# Supplementary material for: Distinct microbial hydrogen and reductant disposal pathways explain interbreed variations in ruminant methane yield
Source: Research Square preprint supplement (doi:10.21203/rs.3.rs-2831003/v1), 2024-04-11
Supplement: Supplementary file 1 [file 07d8cc3f9abc348ff1d10bc0.xlsx]

## Sheet: VFA_production_phylum
phylum	Acetate production		Propionate production		Butyrate production
	Jersey	Holstein	Jersey	Holstein	Jersey	Holstein
Bacteroidetes	92.9175	194.156	148.756	309.121	17.4735	34.8704
Firmicutes	71.2078	98.3026	17.2313	38.9087	36.2936	33.6863
Bacteria_norank	19.3559	17.6722	9.78874	13.1244	5.69515	11.6194
Verrucomicrobia	5.10895	1.59133	0.103886	0.00209408	0	0
Proteobacteria	1.05833	16.7003	0.769085	77.1806	1.05511	0.559059
Fibrobacteres	1.53251	1.80489	1.13173	1.72924	0	0
Spirochaetes	1.14941	2.47573	0.176153	0.575535	1.14138	0.0961039
Euryarchaeota	0.616947	0.743252	0.346456	0.272642	0.424438	0.670069
Others	5.67437	6.9878	0.349219	1.36423	3.00395	1.61673

## Sheet: VFA_production_genus
phylum	Acetate production		Propionate production		Butyrate production
	Jersey	Holstein	Jersey	Holstein	Jersey	Holstein
Prevotella	63.1889	140.596	87.7933	225.191	12.3111	22.127
Bacteria_norank	19.3559	17.6722	9.78874	13.1244	5.69515	11.6194
Bacteroidales_norank	9.72817	19.8636	16.7609	23.3645	0.373219	3.40276
Bacteroides	3.52924	4.84915	15.3852	16.3477	1.20058	4.18743
Prevotellaceae_norank	4.34447	14.8393	13.5176	22.4614	1.46688	2.61863
Clostridiales_norank	16.3864	11.6839	0.343583	0.421881	1.79636	1.42286
Lachnospiraceae_norank	6.03968	16.3104	2.54256	5.83616	8.30703	12.0881
Clostridium	7.75447	16.7462	1.08491	1.93789	4.98692	3.17433
Eubacterium	4.21254	4.20699	1.1674	1.75328	8.43305	1.29559
Firmicutes_norank	6.41819	6.1446	1.36392	1.54699	1.97023	0.943741
Porphyromonadaceae_norank	4.38281	3.68897	3.8778	3.41295	0.879991	1.1513
Ruminococcaceae_norank	5.43676	5.67902	0.885832	1.15945	1.57006	1.59433
Ruminococcus	5.24758	14.2361	1.18003	5.21787	0	0
Oscillibacter	4.34698	3.05932	0	0	1.97125	1.84413
Alistipes	3.88156	3.46005	1.7496	4.34342	0.0344532	0.229732
Rikenellaceae_norank	1.86284	1.6114	2.80241	2.32345	0.858336	0.797247
Verrucomicrobia_norank	4.98055	1.57821	0	0	0	0
Selenomonas	0.511311	3.89779	2.50614	7.2233	0.13946	0.226553
Fibrobacter	1.53251	1.80489	1.13173	1.72924	0	0
Butyrivibrio	0.963469	1.41602	0.450578	0.877231	0.999015	1.71679
Others	24.5173	38.9979	14.3207	24.4329	12.094	17.0245
Succinivibrionaceae_norank	0.0129689	15.2087	0.380172	39.7962	0	0
Glaciecola	0	0	0.00426875	15.0835	0	0
Thalassolituus	0	0	0.00762417	11.0868	0	0
Ruminobacter	0.0721828	0.0412807	0.0331457	10.9842	0	0
Bacteroidia_norank	0.248851	2.3121	0.353326	7.55245	0.0769433	0.0118742

## Sheet: Hydrogenase_phylum
Phylum	Bifurcating hydrogenases				Energy-converting hydrogenases										Fermentative hydrogenases						Methanogenic hydrogenases										Respiratory hydrogenases				Sensory hydrogenases						Hydrogenase-associated diaphorases
	FeFeA3		FeFeA4	FeFeA4	NiFe4c	NiFe4c	NiFe4d	NiFe4d	NiFe4e	NiFe4e	NiFe4f	NiFe4f	NiFe4g	NiFe4g	FeFeA1	FeFeA1	FeFeA2	FeFeA2	FeFeB	FeFeB	Fe	Fe	NiFe3a	NiFe3a	NiFe3c	NiFe3c	NiFe4h	NiFe4h	NiFe4i	NiFe4i	NiFe1b	NiFe1b	NiFe1d	NiFe1d	FeFeC1	FeFeC1	FeFeC2	FeFeC2	FeFeC3	FeFeC3	hydB
	Jersey	Holstein	Jersey	Holstein	Jersey	Holstein	Jersey	Holstein	Jersey	Holstein	Jersey	Holstein	Jersey	Holstein	Jersey	Holstein	Jersey	Holstein	Jersey	Holstein	Jersey	Holstein	Jersey	Holstein	Jersey	Holstein	Jersey	Holstein	Jersey	Holstein	Jersey	Holstein	Jersey	Holstein	Jersey	Holstein	Jersey	Holstein	Jersey	Holstein	Jersey	Holstein
Bacteroidetes	8.67559	8.83262	0	0	0	0	0	0	0	0	0	0	0	0	0	0	0	0	0.0627655	0.0661829	0	0	0	0	0	0	0	0	0	0	0	0	0	0	0	0	0	0	0	0	8.43452	6.20892
Firmicutes	16.14	22.7261	0.346702	0.0405547	0	0	0	0	3.46586	5.54767	1.06126	0.828625	5.54596	3.39636	0.651864	5.67565	2.86243	2.63323	8.4059	9.97809	0	0	0	0	0	0	0	0	0	0	0	0	1.93588	8.00231	0.766112	0.750018	0.864255	2.59325	1.45331	1.34121	53.4808	52.9509
Proteobacteria	0.0727271	0.0561683	0	0	0.197246	0.0384893	0	0	0	0	0	0	0	0	0	0	0.0101957	0	0.0374558	0.063002	0	0	0	0	0	0	0	0	0	0	0.147779	0.0189173	0.0769018	0.0702171	0	0	0	0	0.0481104	0.0056445	0.181573	0.200564
Bacteria_norank	6.86642	3.5077	0	0	0	0	0	0	0	0	0	0	0	0	0.0719999	0.0120104	0	0	0.831002	0.417591	0	0	0	0	0	0	0	0	0	0	0	0	0	0	0	0	0	0	0	0	11.7128	7.72933
Spirochaetes	0.00523492	0.0587052	0	0	0	0	0	0	0	0	0	0	0	0	0	0	0	0	0.179065	0.548325	0	0	0	0	0	0	0	0	0	0	0	0	0	0	0	0	0.0872878	0.495616	0	0.0565722	1.04584	1.7926
Fibrobacteres	0	0	0	0	0	0	0	0	0	0	0	0	0	0	0	0	0	0	0	0	0	0	0	0	0	0	0	0	0	0	0	0	0	0	0	0	0	0	0	0	0	0
Verrucomicrobia	0.89515	0.305284	0	0	0	0	0	0	0	0	0	0	0	0	0	0	0	0	0	0	0	0	0	0	0	0	0	0	0	0	0	0	0	0	0	0	0	0	0	0	2.65547	0.912741
Euryarchaeota	0	0	0	0	0	0	0	0	0	0	0	0	0	0	0	0	0	0	0	0	0.197985	0.025486	0.73917	0.327337	1.124	0.330769	0.446262	0.125982	0.57065	0.134224	0	0	0	0	0	0	0	0	0	0	0	0
Parabasalia	0	0	0	0	0	0	0	0	0	0	0	0	0	0	19.5007	1.16558	0	0	0	0	0	0	0	0	0	0	0	0	0	0	0	0	0	0	0	0	0	0	0	0	0	0
Others	0.376405	0.198753	0	0	0	0	0.0409653	0.272253	0	0	0	0	0	0	0	0	0.0114452	0.12814	0.249457	0.22538	0	0	0	0	0	0	0	0	0	0	0	0	0	0	0	0	0	0	0	0	1.68912	2.15242

## Sheet: Hydrogenase_genus
Genus	Bifurcating hydrogenases				Energy-converting hydrogenases										Fermentative hydrogenases						Methanogenic hydrogenases										Respiratory hydrogenases				Sensory hydrogenases						Hydrogenase-associated diaphorases
	FeFeA3		FeFeA4	FeFeA4	NiFe4c	NiFe4c	NiFe4d	NiFe4d	NiFe4e	NiFe4e	NiFe4f	NiFe4f	NiFe4g	NiFe4g	FeFeA1	FeFeA1	FeFeA2	FeFeA2	FeFeB	FeFeB	Fe	Fe	NiFe3a	NiFe3a	NiFe3c	NiFe3c	NiFe4h	NiFe4h	NiFe4i	NiFe4i	NiFe1b	NiFe1b	NiFe1d	NiFe1d	FeFeC1	FeFeC1	FeFeC2	FeFeC2	FeFeC3	FeFeC3	hydB
	Jersey	Holstein	Jersey	Holstein	Jersey	Holstein	Jersey	Holstein	Jersey	Holstein	Jersey	Holstein	Jersey	Holstein	Jersey	Holstein	Jersey	Holstein	Jersey	Holstein	Jersey	Holstein	Jersey	Holstein	Jersey	Holstein	Jersey	Holstein	Jersey	Holstein	Jersey	Holstein	Jersey	Holstein	Jersey	Holstein	Jersey	Holstein	Jersey	Holstein	Jersey	Holstein
Trichomonas	0	0	0	0	0	0	0	0	0	0	0	0	0	0	19.5007	1.16558	0	0	0	0	0	0	0	0	0	0	0	0	0	0	0	0	0	0	0	0	0	0	0	0	0	0
Bacteria_norank	6.86642	3.5077	0	0	0	0	0	0	0	0	0	0	0	0	0.0719999	0.0120104	0	0	0.831002	0.417591	0	0	0	0	0	0	0	0	0	0	0	0	0	0	0	0	0	0	0	0	11.7128	7.72933
Clostridiales_norank	1.3164	1.17541	0	0	0	0	0	0	0.0649594	0.00920233	0	0	2.9862	0.926153	0.0424918	0.00421333	0.164861	0.101547	1.23764	0.503445	0	0	0	0	0	0	0	0	0	0	0	0	0	0	0	0	0	0	0.194416	0.174152	11.9296	7.034
Ruminococcaceae_norank	2.42919	2.15252	0	0	0	0	0	0	0.0665007	0.0441468	0	0	0	0	0	0	0.28954	0.226394	0.0913519	0.15726	0	0	0	0	0	0	0	0	0	0	0	0	0	0	0.673539	0.376076	0.163528	0.908234	0.377529	0.274556	9.5689	7.7388
Lachnospiraceae_norank	2.18284	3.28684	0	0	0	0	0	0	0.514039	2.56843	0	0	0	0	0	0.0845718	0	0.0455597	3.1753	5.47345	0	0	0	0	0	0	0	0	0	0	0	0	0	0	0.00978383	0.051917	0.233927	0.38651	0.422914	0.593306	6.20826	7.59826
Ruminococcus	1.53102	3.77783	0	0	0	0	0	0	0	0	0	0	0	0	0	0	0	0	0.550075	0.308563	0	0	0	0	0	0	0	0	0	0	0	0	0	0	0	0	0.251521	0.916641	0.296802	0.184531	5.47143	8.96738
Prevotella	6.5315	5.24861	0	0	0	0	0	0	0	0	0	0	0	0	0	0	0	0	0	0	0	0	0	0	0	0	0	0	0	0	0	0	0	0	0	0	0	0	0	0	1.47301	1.13077
Firmicutes_norank	0.793551	0.815976	0	0	0	0	0	0	0	0	0	0	0	0	0	0	0.19762	0.246041	0.934153	0.655938	0	0	0	0	0	0	0	0	0	0	0	0	0	0	0	0	0	0	0.0566892	0.0117637	5.0597	3.38431
Bacteroides	0.570828	0.482133	0	0	0	0	0	0	0	0	0	0	0	0	0	0	0	0	0	0	0	0	0	0	0	0	0	0	0	0	0	0	0	0	0	0	0	0	0	0	5.04782	4.08666
Oscillibacter	1.74513	1.1373	0	0	0	0	0	0	0	0	0	0	0	0	0	0	1.0848	0.776717	0.883599	0.598917	0	0	0	0	0	0	0	0	0	0	0	0	0	0	0	0	0	0	0	0	1.57583	1.01846
Clostridia_norank	0.242497	0.0699155	0	0	0	0	0	0	0.175865	0.028387	0	0	2.47117	2.20517	0	0	0.00416033	0	0	0	0	0	0	0	0	0	0	0	0	0	0	0	0	0	0	0	0	0	0	0	1.26454	0.966278
Clostridium	0.947928	0.814518	0	0	0	0	0	0	0	0	0	0	0	0	0	0.0653767	0.0694302	0.0595958	0.0886091	0.282834	0	0	0	0	0	0	0	0	0	0	0	0	0	0	0	0	0	0	0	0	2.90657	2.75726
Selenomonas	0.669116	5.91504	0	0	0	0	0	0	0	0	0.554019	0.500933	0	0	0.349676	4.75418	0	0	0	0	0	0	0	0	0	0	0	0	0	0	0	0	1.35421	7.19522	0	0	0	0	0	0	0.755475	6.07547
Eubacterium	0.576347	0.920766	0	0	0	0	0	0	0.00730825	0.0903138	0	0	0	0	0	0	0.243281	0.217321	1.01595	0.605951	0	0	0	0	0	0	0	0	0	0	0	0	0	0	0	0	0	0	0.0383098	0.0183872	1.66497	2.02649
Methanobrevibacter	0	0	0	0	0	0	0	0	0	0	0	0	0	0	0	0	0	0	0	0	0.197985	0.025486	0.73917	0.327337	0.945727	0.132251	0.446262	0.125982	0.57065	0.134224	0	0	0	0	0	0	0	0	0	0	0	0
Spartobacteria_norank	0.286593	0.0655772	0	0	0	0	0	0	0	0	0	0	0	0	0	0	0	0	0	0	0	0	0	0	0	0	0	0	0	0	0	0	0	0	0	0	0	0	0	0	2.41768	0.748274
Succiniclasticum	0	0	0	0	0	0	0	0	2.19062	1.46114	0	0	0	0	0	0	0	0	0	0	0	0	0	0	0	0	0	0	0	0	0	0	0	0	0	0	0.212731	0.314458	0	0	0	0
Schwartzia	0.209174	0.226132	0	0	0	0	0	0	0	0	0.100529	0.159731	0	0	0	0	0	0	0	0	0	0	0	0	0	0	0	0	0	0	0	0	0.328838	0.236935	0	0	0	0	0	0	0.867416	0.663253
Coprococcus	1.38742	1.25061	0	0	0	0	0	0	0	0	0	0	0	0	0	0	0.0383937	0.0760641	0	0	0	0	0	0	0	0	0	0	0	0	0	0	0	0	0	0	0	0	0	0	0	0
Bacteroidia_norank	1.19337	2.90583	0	0	0	0	0	0	0	0	0	0	0	0	0	0	0	0	0	0	0	0	0	0	0	0	0	0	0	0	0	0	0	0	0	0	0	0	0	0	0	0
Butyrivibrio	0.15342	0.163228	0	0	0	0	0	0	0.227809	0.241234	0	0	0	0	0	0	0	0	0.152578	0.081732	0	0	0	0	0	0	0	0	0	0	0	0	0	0	0	0	0	0	0.0103813	0.0229523	0.612774	0.811076
Treponema	0	0	0	0	0	0	0	0	0	0	0	0	0	0	0	0	0	0	0.179065	0.548325	0	0	0	0	0	0	0	0	0	0	0	0	0	0	0	0	0.0872878	0.495616	0	0	0.0952157	0.339549
Brachyspira	0	0	0	0	0	0	0	0	0	0	0	0	0	0	0	0	0	0	0	0	0	0	0	0	0	0	0	0	0	0	0	0	0	0	0	0	0	0	0	0	0.229062	1.11885
Others	3.39877	1.76941	0.346702	0.0405547	0.197246	0.0384893	0.0409653	0.272253	0.218753	1.10482	0.406712	0.167962	0.0885942	0.26503	0.259696	0.767309	0.791987	1.01213	0.626324	1.66456	0	0	0	0	0.178275	0.198518	0	0	0	0	0.147779	0.0189173	0.329737	0.640375	0.0827883	0.322025	0.00254733	0.0674118	0.104376	0.123778	10.3391	7.75299

## Sheet: Terminal_phylum
Phylum	Wood-Ljungdahl								Malate dehydrogenase		Succinate dehydrogenase		Lactate dehydrogenase		Butyryl-CoA dehydrogenase		Acetoacetyl-CoA reductase		Crotonoyl-CoA reductase		Methanogenesis						Glutamate synthase						Nitrate reduction				Nitrous oxide reduction		Nitrite reduction to ammonium		Adenylylsulfate reductase		Sulfite reductase				Dimethyl sulfoxide reductase
	CooS	CooS	CODH	codH	fdhA	fdhA	AcsB	AcsB	mdh	mdh	SdhA	SdhA	LDH	LDH	ACADS	ACADS	paaH	paaH	fabV	fabV	McrA	McrA	mer	mer	mtd	mtd	gltD	gltD	gdhA	gdhA	gltB	gltB	napA	napA	narG	narG	nosZ	nosZ	NrfA	NrfA	aprA	aprA	asrA	asrA	DsrA	DsrA	dmsA	dmsA
	Jersey	Holstein	Jersey	Holstein	Jersey	Holstein	Jersey	Holstein	Jersey	Holstein	Jersey	Holstein	Jersey	Holstein	Jersey	Holstein	Jersey	Holstein	Jersey	Holstein	Jersey	Holstein	Jersey	Holstein	Jersey	Holstein	Jersey	Holstein	Jersey	Holstein	Jersey	Holstein	Jersey	Holstein	Jersey	Holstein	Jersey	Holstein	Jersey	Holstein	Jersey	Holstein	Jersey	Holstein	Jersey	Holstein	Jersey	Holstein
Bacteroidetes	1.74453	1.37018	1.60505	1.15972	0	0	0	0	6.21958	0.935936	11.3035	8.90247	0	0	1.89101	3.5631	0.121028	0.126681	0	0	0	0	0	0	0	0	20.2393	56.8018	28.6919	74.4883	5.01945	19.4067	0	0	0.0065665	8.80628	0.166214	0.301098	39.4257	52.7022	0	0	0	0	0	0	0	0
Firmicutes	4.58225	23.7007	1.71722	21.2575	0.382765	0.405942	4.74824	3.85899	0.0365188	0.181063	1.36015	1.19733	1.4236	4.63261	0.723628	1.43368	1.61562	3.65604	0.270444	0.821104	0	0	0	0	0	0	5.90074	11.8252	6.80036	9.73125	1.91331	3.91635	0.284539	0.443454	0.73755	4.57934	0	0	0.689871	1.21079	2.21647	7.0704	2.05398	1.79789	0	0	0	0
Proteobacteria	0.365956	0.232709	0.313033	0.149961	0	0	0	0	0	0	0.145999	18.057	0.02854	0.112023	0	0	0	0	0.147131	16.5767	0	0	0	0	0	0	0.00736667	14.9293	0.0225873	22.061	0.00637775	14.331	0.0994238	0.0472503	0.0454933	0.0316072	0	0	0.108283	0	0.353036	0.0308293	0	0	0.323643	0.0222631	0.0113884	0.0177281
Bacteria_norank	0.113032	0.0319072	0.0715112	0.00319192	0	0	0.0809734	0.0433859	0	0	1.17577	0.285256	1.40145	3.12101	1.44623	1.67561	2.45812	5.31078	0	0	0	0	0	0	0	0	0.593028	0.990456	1.16924	1.05316	0	0	0	0	0	0	0	0	0	0	0	0	0	0	0	0	0	0
Spirochaetes	0.121179	0.176748	0	0	0	0	0.346067	0.327666	0	0	0	0	0.0740651	0.353307	0	0	0	0	1.4	3.29344	0	0	0	0	0	0	0.151161	0.498821	0.954959	1.09188	0	0	0	0	0	0	0	0	0	0	0	0	0	0	0	0	0	0
Fibrobacteres	0	0	0	0	0	0	0	0	0.241582	0.483313	0.816371	1.0657	0	0	0	0	0	0	0.450791	0.630257	0	0	0	0	0	0	0.17715	0.329094	0.00229317	0.0413402	0.0657337	0.194738	0	0	0	0	0	0	0	0	1.21718	0.824774	0	0	0	0	0	0
Verrucomicrobia	0	0	0	0	0	0	0	0	0	0	0	0	0	0	0	0	0	0	0.19935	0.0132823	0	0	0	0	0	0	0.183861	0.0684651	0	0	0.0366559	0.00140917	0	0	0	0	0	0	0	0	0	0	0	0	0	0	0	0
Euryarchaeota	0	0	0	0	0.303052	0.0365195	0	0	0	0	0	0	0	0	0	0	0	0	0	0	1.08752	0.409507	0.0757907	0.00894217	0.188395	0.0467072	0	0	0.0909808	0.0900097	0	0	0	0	0	0	0	0	0	0	0	0	0	0	0	0	0	0
Parabasalia	0	0	0	0	0	0	0	0	0	0	0	0	0	0	0	0	0	0	0	0	0	0	0	0	0	0	0	0	0	0	0	0	0	0	0	0	0	0	0	0	0	0	0	0	0	0	0	0
Others	0	0	0	0	0	0	0	0	0.0387957	0.0710787	0	0.0390588	0.137721	0.404103	0	0	0.432279	0.359053	0	0	0	0	0	0	0	0	0.0369997	0.540464	3.90109	1.04161	0	0	0	0	0	0.087493	0	0	0	0	0	0	0.0756172	0.0322291	0	0	0	0

## Sheet: Terminal_genus
Genus	Wood-Ljungdahl								Malate dehydrogenase		Succinate dehydrogenase		Lactate dehydrogenase		Butyryl-CoA dehydrogenase		Acetoacetyl-CoA reductase		Crotonoyl-CoA reductase		Methanogenesis						Glutamate synthase						Nitrate reduction				Nitrous oxide reduction		Nitrite reduction to ammonium		Adenylylsulfate reductase		Sulfite reductase				Dimethyl sulfoxide reductase
	CooS	CooS	CODH	codH	fdhA	fdhA	AcsB	AcsB	mdh	mdh	SdhA	SdhA	LDH	LDH	ACADS	ACADS	paaH	paaH	fabV	fabV	McrA	McrA	mer	mer	mtd	mtd	gltD	gltD	gdhA	gdhA	gltB	gltB	napA	napA	narG	narG	nosZ	nosZ	NrfA	NrfA	aprA	aprA	asrA	asrA	DsrA	DsrA	dmsA	dmsA
	Jersey	Holstein	Jersey	Holstein	Jersey	Holstein	Jersey	Holstein	Jersey	Holstein	Jersey	Holstein	Jersey	Holstein	Jersey	Holstein	Jersey	Holstein	Jersey	Holstein	Jersey	Holstein	Jersey	Holstein	Jersey	Holstein	Jersey	Holstein	Jersey	Holstein	Jersey	Holstein	Jersey	Holstein	Jersey	Holstein	Jersey	Holstein	Jersey	Holstein	Jersey	Holstein	Jersey	Holstein	Jersey	Holstein	Jersey	Holstein
Prevotella	0	0	0	0	0	0	0	0	0	0	4.77483	4.93461	0	0	0	0	0	0	0	0	0	0	0	0	0	0	15.1922	40.9123	20.7663	51.1295	4.74985	18.0737	0	0	0	0	0.166214	0.301098	38.8916	50.2883	0	0	0	0	0	0	0	0
Bacteroidales_norank	1.74453	1.37018	1.60505	1.15972	0	0	0	0	0.810115	0.0995607	2.41123	1.35953	0	0	0	0	0	0	0	0	0	0	0	0	0	0	1.10101	1.97019	3.04518	3.33488	0.0455287	0.223713	0	0	0	0	0	0	0.00717042	0.261674	0	0	0	0	0	0	0	0
Bacteroides	0	0	0	0	0	0	0	0	2.96309	0.177359	0.803501	0.494346	0	0	0	0	0	0	0	0	0	0	0	0	0	0	1.25317	2.89627	0.299653	0.751586	0.0591546	0.121847	0	0	0	0	0	0	0.411889	0.18887	0	0	0	0	0	0	0	0
Bacteria_norank	0.113032	0.0319072	0.0715112	0.00319192	0	0	0.0809734	0.0433859	0	0	1.17577	0.285256	1.40145	3.12101	1.44623	1.67561	2.45812	5.31078	0	0	0	0	0	0	0	0	0.593028	0.990456	1.16924	1.05316	0	0	0	0	0	0	0	0	0	0	0	0	0	0	0	0	0	0
Lachnospiraceae_norank	0.280628	0.193202	0.212677	0.0338059	0.0128	0.0663423	0.522749	0.165201	0	0	0	0	0.0359652	0.842063	0.192212	0.733155	0.615711	2.05173	0.0225305	0.113559	0	0	0	0	0	0	1.00499	2.84801	0.748853	1.55692	0.0555113	0.743105	0	0	0	0	0	0	0	0	0.0105024	0.138395	1.05736	0.853873	0	0	0	0
Prevotellaceae_norank	0	0	0	0	0	0	0	0	0	0	0	0	0	0	0	0	0	0	0	0	0	0	0	0	0	0	1.77418	8.1289	1.44197	12.4457	0.164908	0.987442	0	0	0.0065665	8.80628	0	0	0.00525058	1.90596	0	0	0	0	0	0	0	0
Clostridiales_norank	0.510696	0.350963	0.171802	0.0889505	0	0	0.507163	0.567112	0	0	0	0	0.00247933	0.0437565	0	0	0.104789	0.072787	0	0	0	0	0	0	0	0	0.236943	0.108286	1.13855	1.09512	0	0	0	0	0	0	0	0	0	0	0	0	0.295038	0.235011	0	0	0	0
Ruminococcus	0.667924	0.87395	0.0719923	0.12965	0	0	0.0219932	0.0212554	0	0	0	0	0.27699	1.24766	0	0	0	0	0.0071485	0.0264496	0	0	0	0	0	0	0.510535	2.49459	0.438637	1.63722	0.17397	0.565535	0	0	0	0	0	0	0	0	0.225816	0.0775241	0	0	0	0	0	0
Alistipes	0	0	0	0	0	0	0	0	0	0	0	0	0	0	0.118894	2.40543	0	0	0	0	0	0	0	0	0	0	0.361966	0.271171	0.0345842	0.0517989	0	0	0	0	0	0	0	0	0	0	0	0	0	0	0	0	0	0
Selenomonas	0.512312	5.84334	0.2362	5.57502	0	0	0	0	0	0.157674	0.368293	0.334385	0	0	0	0	0	0	0	0	0	0	0	0	0	0	0.0338438	0.382872	0.244565	0.544478	0	0	0.284539	0.443454	0.682417	1.56477	0	0	0.610187	0.810456	0.851595	4.70924	0	0	0	0	0	0
Treponema	0.121179	0.176748	0	0	0	0	0.346067	0.327666	0	0	0	0	0.0740651	0.353307	0	0	0	0	1.4	3.29344	0	0	0	0	0	0	0.12673	0.423171	0.954959	1.03855	0	0	0	0	0	0	0	0	0	0	0	0	0	0	0	0	0	0
Fibrobacter	0	0	0	0	0	0	0	0	0.241582	0.483313	0.816371	1.0657	0	0	0	0	0	0	0.450791	0.630257	0	0	0	0	0	0	0.17715	0.329094	0.00229317	0.0413402	0.0657337	0.194738	0	0	0	0	0	0	0	0	1.21718	0.824774	0	0	0	0	0	0
Ruminococcaceae_norank	0.0560101	0.134244	0.019587	0.000684417	0	0	0	0	0	0	0	0	0.100658	0.264312	0	0	0	0	0.190915	0.384258	0	0	0	0	0	0	0.275692	0.61715	0.267776	0.417885	0.00025025	0.115979	0	0	0	0	0	0	0	0	0.416787	0.0601257	0	0	0	0	0	0
Firmicutes_norank	0.562005	0.486856	0.155659	0.252656	0	0	1.31482	1.34021	0	0	0	0	0	0.0378011	0.149482	0.162938	0.114147	0.155632	0	0	0	0	0	0	0	0	0.774997	0.538345	1.22949	0.749373	0.0900361	0.151012	0	0	0	0	0	0	0	0	0	0	0.0483479	0.0709329	0	0	0	0
Succiniclasticum	0	0	0	0	0	0	0	0	0	0	0	0	0	0	0	0	0	0	0	0	0	0	0	0	0	0	0.946941	1.52045	0	0	1.02509	0.765064	0	0	0	0	0	0	0	0	0	0	0	0	0	0	0	0
Entodinium	0	0	0	0	0	0	0	0	0	0	0	0	0	0	0	0	0	0	0	0	0	0	0	0	0	0	0	0	3.77076	0.161815	0	0	0	0	0	0	0	0	0	0	0	0	0	0	0	0	0	0
Rikenellaceae_norank	0	0	0	0	0	0	0	0	0	0	0	0	0	0	0	0	0	0	0	0	0	0	0	0	0	0	0.0522808	0.237333	1.94983	2.79036	0	0	0	0	0	0	0	0	0	0	0	0	0	0	0	0	0	0
Verrucomicrobia_norank	0	0	0	0	0	0	0	0	0	0	0	0	0	0	0	0	0	0	0	0	0	0	0	0	0	0	0.183861	0.0684651	0	0	0.0366559	0.00140917	0	0	0	0	0	0	0	0	0	0	0	0	0	0	0	0
Alloprevotella	0	0	0	0	0	0	0	0	0	0	0	0.127792	0	0	0	0	0	0	0	0	0	0	0	0	0	0	0	0	0.495774	0.283873	0	0	0	0	0	0	0	0	0	0	0	0	0	0	0	0	0	0
Eubacterium	0.00922992	14.6621	0.00922992	14.6621	0.0533608	0.0760149	0.0694498	0.0921862	0	0	0	0	0.222404	0.469402	0	0	0.204424	0.196679	0	0	0	0	0	0	0	0	0.337309	0.409096	0.0904174	0.569184	0.379952	0.119589	0	0	0	0	0	0	0	0	0.281238	0.158303	0	0	0	0	0	0
Aliagarivorans	0	0	0	0	0	0	0	0	0	0	0	0	0	0	0	0	0	0	0	0	0	0	0	0	0	0	0	0	0	0	0	0	0	0	0	0	0	0	0	0	0	0	0	0	0	0	0	0
Succinivibrionaceae_norank	0	0	0	0	0	0	0	0	0	0	0.00944733	18.0079	0	0	0	0	0	0	0.0156717	16.5749	0	0	0	0	0	0	0	0	0.013734	22.0079	0	0	0	0	0	0	0	0	0	0	0	0	0	0	0	0	0	0
Tolumonas	0	0	0	0	0	0	0	0	0	0	0	0	0	0	0	0	0	0	0	0	0	0	0	0	0	0	0	0	0	0	0.00637775	14.331	0	0	0	0	0	0	0	0	0	0	0	0	0	0	0	0
Ruminobacter	0.365956	0.232709	0.313033	0.149961	0	0	0	0	0	0	0	0	0	0	0	0	0	0	0	0	0	0	0	0	0	0	0.00736667	14.9293	0	0	0	0	0	0	0	0	0	0	0	0	0.12823	0	0	0	0	0	0	0
Bacteroidia_norank	0	0	0	0	0	0	0	0	0.24787	0.0977377	1.06259	0.662173	0	0	0	0	0	0	0	0	0	0	0	0	0	0	0.000548667	2.04871	0.0551651	2.50174	0	0	0	0	0	0	0	0	0	0	0	0	0	0	0	0	0	0
Clostridium	0.0636886	0.0353802	0	0	0	0	0.317146	0.143662	0	0	0	0	0.483417	0.315237	0	0.0574121	0.198673	0.197237	0	0.280329	0	0	0	0	0	0	0.122726	0.663956	0.444542	0.421243	0.0832669	0.55272	0	0	0	0	0	0	0	0	0.123323	0.238512	0.0024235	0.0334866	0	0	0	0
Others	1.91976	1.12072	0.840075	0.514716	0.619656	0.300104	1.99492	1.52936	2.27382	0.655747	3.37976	2.2751	0.467947	1.9285	2.15405	1.63784	0.931183	1.46771	0.38066	0.0316391	1.08752	0.409507	0.0757907	0.00894217	0.188395	0.0467072	2.2222	3.19558	3.03115	5.01494	0.105229	0.903347	0.0994238	0.0472502	0.100626	3.13367	0	0	0.297839	0.457711	0.532016	1.71913	0.726431	0.636813	0.323643	0.0222631	0.0113884	0.0177281
