# Supplementary material for: Distinct microbial hydrogen and reductant disposal pathways explain interbreed variations in ruminant methane yield
Source: Research Square preprint supplement (doi:10.21203/rs.3.rs-2831003/v1), 2024-04-11
Supplement: Supplementary file 2 [file 1bc08a30e4ce45e98e566618.xlsx]

## Sheet: quality and tax
Origin Genome ID	New Genome ID	Source	Domain	Phylum	Class	Order	Family	Genus	Species
RGIG1370	China_rumen197	China rumen	Bacteria	Firmicutes	Bacilli	Erysipelotrichales	Erysipelotrichaceae	RUG521
RGIG1344	China_rumen171	China rumen	Bacteria	Bacteroidota	Bacteroidia	Bacteroidales	UBA932	RC9
RGIG1342	China_rumen169	China rumen	Bacteria	Spirochaetota	Spirochaetia	Treponematales	Treponemataceae	Treponema_D	Treponema_D sp002369025
RGIG1349	China_rumen176	China rumen	Bacteria	Bacteroidota	Bacteroidia	Bacteroidales	Muribaculaceae	C941	C941 sp900318065
RGIG1345	China_rumen172	China rumen	Bacteria	Firmicutes_C	Negativicutes	Selenomonadales	Selenomonadaceae	UBA3796
RGIG1346	China_rumen173	China rumen	Bacteria	Firmicutes_A	Clostridia	Lachnospirales	Lachnospiraceae	UBA1201_A
RGIG1347	China_rumen174	China rumen	Bacteria	Firmicutes_A	Clostridia	Peptostreptococcales	Anaerovoracaceae	UBA1764
RGIG1348	China_rumen175	China rumen	Bacteria	Firmicutes_A	Clostridia	Oscillospirales	Ruminococcaceae	Ruminococcus
RGIG1350	China_rumen177	China rumen	Bacteria	Bacteroidota	Bacteroidia	Bacteroidales	Paludibacteraceae	RF16	RF16 sp900321775
RGIG1351	China_rumen178	China rumen	Bacteria	Bacteroidota	Bacteroidia	Bacteroidales	UBA932	RC9	RC9 sp900167925
RGIG1352	China_rumen179	China rumen	Bacteria	Firmicutes_A	Clostridia	Lachnospirales	Lachnospiraceae
RGIG1353	China_rumen180	China rumen	Bacteria	Firmicutes_A	Clostridia	Oscillospirales	Ruminococcaceae	CAG-353
RGIG1354	China_rumen181	China rumen	Bacteria	Firmicutes_A	Clostridia	Peptostreptococcales	Anaerovoracaceae	UBA3738
RGIG1355	China_rumen182	China rumen	Bacteria	Firmicutes_A	Clostridia_A	Christensenellales	CAG-74	SFHK01
RGIG1356	China_rumen183	China rumen	Bacteria	Firmicutes_A	Clostridia	Oscillospirales	Acutalibacteraceae	Ruminococcus_E
RGIG1358	China_rumen185	China rumen	Bacteria	Firmicutes_A	Clostridia	Peptostreptococcales	Anaerovoracaceae	UBA1764
RGIG1357	China_rumen184	China rumen	Bacteria	Firmicutes_A	Clostridia	Lachnospirales	Lachnospiraceae	NC2004	NC2004 sp000621905
RGIG1362	China_rumen189	China rumen	Bacteria	Firmicutes	Bacilli	Erysipelotrichales	Erysipelotrichaceae	RUG521
RGIG1360	China_rumen187	China rumen	Bacteria	Firmicutes_A	Clostridia	Oscillospirales	Acutalibacteraceae	CAG-177
RGIG1361	China_rumen188	China rumen	Bacteria	Firmicutes_A	Clostridia	Oscillospirales	Ruminococcaceae	Ruminococcus_D	Ruminococcus_D sp900319075
RGIG1363	China_rumen190	China rumen	Bacteria	Firmicutes_A	Clostridia	Oscillospirales
RGIG1365	China_rumen192	China rumen	Bacteria	Spirochaetota	GWE2-31-10	GWE2-31-10	GWE2-31-10
RGIG1364	China_rumen191	China rumen	Bacteria	Bacteroidota	Bacteroidia	Bacteroidales	Bacteroidaceae	UBA4334
RGIG1366	China_rumen193	China rumen	Bacteria	Bacteroidota	Bacteroidia	Bacteroidales	Paludibacteraceae	RUG163	RUG163 sp900316995
RGIG1368	China_rumen195	China rumen	Bacteria	Firmicutes_A	Clostridia	Oscillospirales	CAG-272	CAG-448
RGIG1372	China_rumen199	China rumen	Bacteria	Firmicutes_A	Clostridia	Oscillospirales	Ruminococcaceae	CAG-353	CAG-353 sp002395525
RGIG1373	China_rumen200	China rumen	Bacteria	Firmicutes_A	Clostridia	Oscillospirales	CAG-382	UBA1752
RGIG1375	China_rumen202	China rumen	Bacteria	Firmicutes_A	Clostridia	Lachnospirales	Lachnospiraceae	UBA3766
RGIG1377	China_rumen204	China rumen	Bacteria	Firmicutes_A	Clostridia	Oscillospirales	CAG-272	UMGS1225
RGIG1378	China_rumen205	China rumen	Bacteria	Bacteroidota	Bacteroidia	Bacteroidales	UBA932	RC9
RGIG1379	China_rumen206	China rumen	Bacteria	Firmicutes	Bacilli	RFN20	CAG-826	UBA733
RGIG1380	China_rumen207	China rumen	Bacteria	Firmicutes_A	Clostridia	Oscillospirales	Ruminococcaceae	Ruminococcus_D
RGIG1381	China_rumen208	China rumen	Bacteria	Firmicutes_A	Clostridia	Oscillospirales	Ruminococcaceae	Firm-04
RGIG1382	China_rumen209	China rumen	Bacteria	Firmicutes_A	Clostridia_A	Christensenellales	CAG-138	PeH17
RGIG1383	China_rumen210	China rumen	Bacteria	Firmicutes_A	Clostridia	Peptostreptococcales	Anaerovoracaceae	UBA1764
RGIG1384	China_rumen211	China rumen	Bacteria	Elusimicrobiota	Elusimicrobia	Elusimicrobiales	Elusimicrobiaceae
RGIG1385	China_rumen212	China rumen	Bacteria	Firmicutes_A	Clostridia	Oscillospirales	Butyricicoccaceae	UMGS1384
RGIG1386	China_rumen213	China rumen	Bacteria	Bacteroidota	Bacteroidia	Bacteroidales	Bacteroidaceae	Ga6A1	Ga6A1 sp900102385
RGIG1387	China_rumen214	China rumen	Bacteria	Firmicutes_A	Clostridia	Oscillospirales	Ruminococcaceae	Ruminococcus
RGIG1388	China_rumen215	China rumen	Bacteria	Bacteroidota	Bacteroidia	Bacteroidales	UBA932	RC9	RC9 sp002308935
RGIG1390	China_rumen217	China rumen	Bacteria	Firmicutes_A	Clostridia	Lachnospirales	Lachnospiraceae	NK4A144
RGIG1392	China_rumen219	China rumen	Bacteria	Bacteroidota	Bacteroidia	Bacteroidales	Paludibacteraceae	UBA4363
RGIG1394	China_rumen221	China rumen	Bacteria	Firmicutes_A	Clostridia	Oscillospirales	CAG-272	UMGS1696
RGIG1396	China_rumen223	China rumen	Bacteria	Firmicutes_A	Clostridia	Oscillospirales	Acutalibacteraceae	DTU089_A
RGIG1397	China_rumen224	China rumen	Bacteria	Firmicutes_A	Clostridia	UBA1212	UBA1212	UBA1212
RGIG1398	China_rumen225	China rumen	Bacteria	Firmicutes_A	Clostridia	Lachnospirales	Lachnospiraceae	UBA1258
RGIG1399	China_rumen226	China rumen	Bacteria	Firmicutes_A	Clostridia	Lachnospirales	Lachnospiraceae	AC2028
RGIG1400	China_rumen227	China rumen	Bacteria	Firmicutes_A	Clostridia	Oscillospirales	Acutalibacteraceae	UBA1227
RGIG1402	China_rumen229	China rumen	Bacteria	Firmicutes_A	Clostridia	Oscillospirales	Acutalibacteraceae	Eubacterium_R
RGIG1401	China_rumen228	China rumen	Bacteria	Firmicutes_A	Clostridia	Lachnospirales	Lachnospiraceae	Acetatifactor
RGIG1404	China_rumen231	China rumen	Bacteria	Bacteroidota	Bacteroidia	Bacteroidales	Bacteroidaceae	UBA4372
RGIG1405	China_rumen232	China rumen	Bacteria	Firmicutes_A	Clostridia_A	Christensenellales	CAG-138	UBA3857	UBA3857 sp900313585
RGIG1406	China_rumen233	China rumen	Bacteria	Firmicutes_A	Clostridia	UBA1212	UBA1257	UBA1257	UBA1257 sp002308775
RGIG1407	China_rumen234	China rumen	Bacteria	Firmicutes_A	Clostridia_A	Christensenellales	Christensenellaceae	QANA01
RGIG1408	China_rumen235	China rumen	Bacteria	Bacteroidota	Bacteroidia	Bacteroidales	Bacteroidaceae	UBA1786
RGIG1409	China_rumen236	China rumen	Bacteria	Bacteroidota	Bacteroidia	Bacteroidales	WCHB1-69	F23-D06	F23-D06 sp900315705
RGIG1411	China_rumen238	China rumen	Bacteria	Spirochaetota	Spirochaetia	Sphaerochaetales	Sphaerochaetaceae	UBA9732
RGIG1412	China_rumen239	China rumen	Bacteria	Firmicutes_A	Clostridia	Lachnospirales	Lachnospiraceae	1XD42-69
RGIG1414	China_rumen241	China rumen	Bacteria	Firmicutes_A	Clostridia_A	Christensenellales	CAG-138	UBA3857
RGIG1415	China_rumen242	China rumen	Bacteria	Bacteroidota	Bacteroidia	Bacteroidales	WCHB1-69	UBA1756
RGIG1416	China_rumen243	China rumen	Bacteria	Bacteroidota	Bacteroidia	Bacteroidales	Bacteroidaceae	Prevotella	Prevotella sp900315775
RGIG1418	China_rumen245	China rumen	Bacteria	Firmicutes_A	Clostridia	Lachnospirales	Lachnospiraceae	AC2028	AC2028 sp000702685
RGIG1423	China_rumen250	China rumen	Bacteria	Firmicutes_A	Clostridia	Lachnospirales	Lachnospiraceae
RGIG1419	China_rumen246	China rumen	Bacteria	Bacteroidota	Bacteroidia	Bacteroidales	UBA932	RC9	RC9 sp900318955
RGIG1420	China_rumen247	China rumen	Bacteria	Firmicutes_A	Clostridia	Oscillospirales	Ruminococcaceae	Ruminococcus	Ruminococcus sp002394695
RGIG1421	China_rumen248	China rumen	Bacteria	Bacteroidota	Bacteroidia	Bacteroidales	UBA932	RC9
RGIG1422	China_rumen249	China rumen	Bacteria	Bacteroidota	Bacteroidia	Bacteroidales	UBA932	RC9
RGIG1424	China_rumen251	China rumen	Bacteria	Bacteroidota	Bacteroidia	Bacteroidales	Paludibacteraceae	UBA4363	UBA4363 sp002393965
RGIG1425	China_rumen252	China rumen	Bacteria	Myxococcota	Bradimonadia	Bradymonadales	UBA4248	UBA4248
RGIG1426	China_rumen253	China rumen	Bacteria	Firmicutes_A	Clostridia	Oscillospirales	CAG-272	UMGS1696
RGIG1427	China_rumen254	China rumen	Bacteria	Firmicutes_A	Clostridia	Oscillospirales	Oscillospiraceae	CAG-110	CAG-110 sp900315595
RGIG1428	China_rumen255	China rumen	Bacteria	Bacteroidota	Bacteroidia	Bacteroidales	UBA932	RC9
RGIG1429	China_rumen256	China rumen	Bacteria	Firmicutes_A	Clostridia	Oscillospirales	CAG-272
RGIG1430	China_rumen257	China rumen	Bacteria	Firmicutes_A	Clostridia	Lachnospirales	Lachnospiraceae
RGIG1431	China_rumen258	China rumen	Bacteria	Firmicutes_A	Clostridia	Oscillospirales	Ruminococcaceae
RGIG1450	China_rumen277	China rumen	Bacteria	Bacteroidota	Bacteroidia	Bacteroidales	Bacteroidaceae	Prevotella
RGIG1432	China_rumen259	China rumen	Bacteria	Firmicutes_A	Clostridia	Lachnospirales	Lachnospiraceae	CAG-791
RGIG1434	China_rumen261	China rumen	Bacteria	Firmicutes_A	Clostridia	Oscillospirales	CAG-382_A
RGIG1435	China_rumen262	China rumen	Bacteria	Firmicutes_A	Clostridia	Oscillospirales	CAG-272	UBA1248
RGIG1436	China_rumen263	China rumen	Bacteria	Firmicutes_C	Negativicutes	Selenomonadales	Selenomonadaceae	Anaerovibrio
RGIG1437	China_rumen264	China rumen	Bacteria	Firmicutes_A	Clostridia	Oscillospirales	CAG-272	UMGS1696
RGIG1438	China_rumen265	China rumen	Bacteria	Firmicutes_A	Clostridia_A	Christensenellales	Christensenellaceae	QANA01
RGIG1439	China_rumen266	China rumen	Bacteria	Firmicutes_A	Clostridia_A	Christensenellales	UBA1750
RGIG1440	China_rumen267	China rumen	Bacteria	Firmicutes_A	Clostridia	Oscillospirales	Ruminococcaceae	CAG-353
RGIG1441	China_rumen268	China rumen	Bacteria	Firmicutes	Bacilli	Erysipelotrichales	Erysipelotrichaceae
RGIG1442	China_rumen269	China rumen	Bacteria	Firmicutes_A	Clostridia	Oscillospirales	Oscillospiraceae
RGIG1443	China_rumen270	China rumen	Bacteria	Firmicutes_A	Clostridia	Lachnospirales	Lachnospiraceae	XBD2001
RGIG1446	China_rumen273	China rumen	Bacteria	Firmicutes	Bacilli	Acholeplasmatales	Anaeroplasmataceae	Anaeroplasma
RGIG1447	China_rumen274	China rumen	Bacteria	Firmicutes_A	Clostridia	UBA1212	UBA1255	UBA1255
RGIG1448	China_rumen275	China rumen	Bacteria	Firmicutes_C	Negativicutes	Selenomonadales	Selenomonadaceae	Schwartzia	Schwartzia succinivorans
RGIG1449	China_rumen276	China rumen	Bacteria	Bacteroidota	Bacteroidia	Bacteroidales	UBA932	RC9
RGIG1451	China_rumen278	China rumen	Bacteria	Bacteroidota	Bacteroidia	Bacteroidales	P3	UBA1711
RGIG1452	China_rumen279	China rumen	Bacteria	Firmicutes_A	Clostridia	Oscillospirales	Oscillospiraceae	RUG626
RGIG1455	China_rumen282	China rumen	Bacteria	Firmicutes_A	Clostridia	Oscillospirales	CAG-272	UMGS1696
RGIG1453	China_rumen280	China rumen	Bacteria	Firmicutes_A	Clostridia	Lachnospirales	UBA1390	UBA1390
RGIG1454	China_rumen281	China rumen	Bacteria	Firmicutes_A	Clostridia	Oscillospirales
RGIG1456	China_rumen283	China rumen	Bacteria	Firmicutes_A	Clostridia	Lachnospirales	Lachnospiraceae	1XD8-76
RGIG1457	China_rumen284	China rumen	Bacteria	Firmicutes_A	Clostridia	Lachnospirales	Lachnospiraceae	UBA1753
RGIG1458	China_rumen285	China rumen	Bacteria	Firmicutes_A	Clostridia	Lachnospirales	Lachnospiraceae
RGIG1463	China_rumen290	China rumen	Archaea	Thermoplasmatota	Thermoplasmata	Methanomassiliicoccales	Methanomethylophilaceae	Methanomethylophilus
RGIG1459	China_rumen286	China rumen	Bacteria	Bacteroidota	Bacteroidia	Bacteroidales	Bacteroidaceae	UBA3839	UBA3839 sp900321835
RGIG1460	China_rumen287	China rumen	Bacteria	Firmicutes_A	Clostridia	Oscillospirales	Acutalibacteraceae	UBA737
RGIG1461	China_rumen288	China rumen	Bacteria	Firmicutes_A	Clostridia	Peptostreptococcales	Anaerovoracaceae	UBA1764
RGIG1462	China_rumen289	China rumen	Bacteria	Firmicutes_A	Clostridia	Oscillospirales	Acutalibacteraceae	UBA6857
RGIG1464	China_rumen291	China rumen	Bacteria	Bacteroidota	Bacteroidia	Bacteroidales	Bacteroidaceae	UBA4334
RGIG1466	China_rumen293	China rumen	Bacteria	Firmicutes_A	Clostridia	Oscillospirales	UBA644
RGIG1174	China_rumen1	China rumen	Bacteria	Spirochaetota	Spirochaetia	Treponematales	Treponemataceae	Treponema_D	Treponema_D sp002373205
RGIG1175	China_rumen2	China rumen	Bacteria	Firmicutes_A	Clostridia	Oscillospirales	Acutalibacteraceae	Ruminococcus_E
RGIG1176	China_rumen3	China rumen	Archaea	Thermoplasmatota	Thermoplasmata	Methanomassiliicoccales	Methanomethylophilaceae	Methanomethylophilus
RGIG1178	China_rumen5	China rumen	Bacteria	Firmicutes	Bacilli	RFN20	CAG-826	UBA733	UBA733 sp900317295
RGIG1179	China_rumen6	China rumen	Bacteria	Bacteroidota	Bacteroidia	Bacteroidales	Bacteroidaceae	Prevotella	Prevotella sp900314715
RGIG1180	China_rumen7	China rumen	Bacteria	Firmicutes_A	Clostridia	Oscillospirales	Acutalibacteraceae	UBA1227
RGIG1181	China_rumen8	China rumen	Bacteria	Bacteroidota	Bacteroidia	Bacteroidales	F082	F082
RGIG1182	China_rumen9	China rumen	Bacteria	Bacteroidota	Bacteroidia	Bacteroidales	UBA932	RC9
RGIG1183	China_rumen10	China rumen	Bacteria	Bacteroidota	Bacteroidia	Bacteroidales	WCHB1-69	UBA1195	UBA1195 sp002309855
RGIG1184	China_rumen11	China rumen	Bacteria	Firmicutes	Bacilli	Erysipelotrichales	Erysipelotrichaceae	UBA636	UBA636 sp900321955
RGIG1185	China_rumen12	China rumen	Bacteria	Bacteroidota	Bacteroidia	Bacteroidales	UBA932	UBA1232	UBA1232 sp900316795
RGIG1186	China_rumen13	China rumen	Bacteria	Firmicutes_A	Clostridia	Lachnospirales	Lachnospiraceae	XBD2001
RGIG1187	China_rumen14	China rumen	Bacteria	Firmicutes	Bacilli	Erysipelotrichales	Erysipelotrichaceae	UBA636
RGIG1190	China_rumen17	China rumen	Bacteria	Bacteroidota	Bacteroidia	Bacteroidales	P3
RGIG1191	China_rumen18	China rumen	Bacteria	Bacteroidota	Bacteroidia	Bacteroidales	UBA932	RC9	RC9 sp900317925
RGIG1193	China_rumen20	China rumen	Bacteria	Bacteroidota	Bacteroidia	Bacteroidales	WCHB1-69	F23-D06	F23-D06 sp900319925
RGIG1196	China_rumen23	China rumen	Bacteria	Bacteroidota	Bacteroidia	Bacteroidales	Bacteroidaceae	UBA4372	UBA4372 sp900320715
RGIG1197	China_rumen24	China rumen	Bacteria	Bacteroidota	Bacteroidia	Bacteroidales	Muribaculaceae	C941
RGIG1198	China_rumen25	China rumen	Bacteria	Bacteroidota	Bacteroidia	Bacteroidales	Paludibacteraceae	RF16
RGIG1199	China_rumen26	China rumen	Bacteria	Bacteroidota	Bacteroidia	Bacteroidales	Bacteroidaceae	Prevotella	Prevotella sp900314715
RGIG1200	China_rumen27	China rumen	Bacteria	Bacteroidota	Bacteroidia	Bacteroidales	UBA932	RC9	RC9 sp900167925
RGIG1201	China_rumen28	China rumen	Bacteria	Desulfobacterota	Desulfovibrionia	Desulfovibrionales	Desulfovibrionaceae	Desulfovibrio
RGIG1202	China_rumen29	China rumen	Bacteria	Spirochaetota	Spirochaetia	Sphaerochaetales	Sphaerochaetaceae	UBA9732
RGIG1203	China_rumen30	China rumen	Bacteria	Firmicutes_A	Clostridia	Lachnospirales	Lachnospiraceae	XBD2001	XBD2001 sp900116395
RGIG1204	China_rumen31	China rumen	Bacteria	Bacteroidota	Bacteroidia	Bacteroidales	Bacteroidaceae	Prevotella	Prevotella sp002353585
RGIG1205	China_rumen32	China rumen	Bacteria	Spirochaetota	Spirochaetia	Treponematales	Treponemataceae	Treponema_D
RGIG1206	China_rumen33	China rumen	Bacteria	Bacteroidota	Bacteroidia	Bacteroidales	UBA932	RC9
RGIG1207	China_rumen34	China rumen	Bacteria	Bacteroidota	Bacteroidia	Bacteroidales	Bacteroidaceae	UBA4334	UBA4334 sp900316505
RGIG1208	China_rumen35	China rumen	Bacteria	Firmicutes_A	Clostridia	Oscillospirales	Acutalibacteraceae	Ruminococcus_E	Ruminococcus_E sp900316555
RGIG1209	China_rumen36	China rumen	Bacteria	Bacteroidota	Bacteroidia	Bacteroidales	Paludibacteraceae	RF16
RGIG1211	China_rumen38	China rumen	Bacteria	Firmicutes_A	Clostridia	Lachnospirales	Lachnospiraceae	ISDg
RGIG1212	China_rumen39	China rumen	Bacteria	Bacteroidota	Bacteroidia	Bacteroidales	ML635J-15	Bact-19
RGIG1213	China_rumen40	China rumen	Bacteria	Bacteroidota	Bacteroidia	Bacteroidales	P3	UBA1711
RGIG1214	China_rumen41	China rumen	Bacteria	Bacteroidota	Bacteroidia	Bacteroidales	UBA932	RC9
RGIG1215	China_rumen42	China rumen	Bacteria	Firmicutes_A	Clostridia	Oscillospirales	CAG-272	UMGS1696
RGIG1216	China_rumen43	China rumen	Bacteria	Spirochaetota	Spirochaetia	Treponematales	Treponemataceae	Treponema_D
RGIG1217	China_rumen44	China rumen	Bacteria	Bacteroidota	Bacteroidia	Bacteroidales	Muribaculaceae	C941	C941 sp900316835
RGIG1218	China_rumen45	China rumen	Bacteria	Bacteroidota	Bacteroidia	Bacteroidales	UBA932	RC9	RC9 sp900318955
RGIG1219	China_rumen46	China rumen	Bacteria	Planctomycetota	Planctomycetes	Pirellulales	Thermoguttaceae
RGIG1221	China_rumen48	China rumen	Bacteria	Spirochaetota	Spirochaetia	Treponematales	Treponemataceae	Treponema_D
RGIG1223	China_rumen50	China rumen	Bacteria	Fibrobacterota	Fibrobacteria	Fibrobacterales	Fibrobacteraceae	Fibrobacter
RGIG1224	China_rumen51	China rumen	Bacteria	Firmicutes_A	Clostridia	Lachnospirales	Lachnospiraceae	Weimerbacter
RGIG1225	China_rumen52	China rumen	Bacteria	Riflebacteria	Ozemobacteria	Ozemobacterales	Ozemobacteraceae	RUG334
RGIG1226	China_rumen53	China rumen	Bacteria	Firmicutes	Bacilli	Erysipelotrichales	Erysipelotrichaceae	UBA636
RGIG1227	China_rumen54	China rumen	Bacteria	Bacteroidota	Bacteroidia	Bacteroidales	Paludibacteraceae	UBA4363
RGIG1228	China_rumen55	China rumen	Bacteria	Bacteroidota	Bacteroidia	Bacteroidales	Bacteroidaceae	UBA3839
RGIG1229	China_rumen56	China rumen	Bacteria	Firmicutes_A	Clostridia	Lachnospirales	Lachnospiraceae	XBD2001	XBD2001 sp900116395
RGIG1230	China_rumen57	China rumen	Bacteria	Firmicutes_A	Clostridia	Oscillospirales	Acutalibacteraceae	RUG420
RGIG1232	China_rumen59	China rumen	Bacteria	Firmicutes_A	Clostridia	Oscillospirales	Ruminococcaceae	Ruminococcus_D
RGIG1233	China_rumen60	China rumen	Bacteria	Bacteroidota	Bacteroidia	Bacteroidales	ML635J-15	Bact-19
RGIG1234	China_rumen61	China rumen	Bacteria	Bacteroidota	Bacteroidia	Bacteroidales	Bacteroidaceae	Prevotella	Prevotella sp900314715
RGIG1235	China_rumen62	China rumen	Bacteria	Firmicutes	Bacilli	Erysipelotrichales	Erysipelotrichaceae	UBA636
RGIG1236	China_rumen63	China rumen	Bacteria	Bacteroidota	Bacteroidia	Bacteroidales	Bacteroidaceae	UBA4372	UBA4372 sp900320715
RGIG1237	China_rumen64	China rumen	Bacteria	Spirochaetota	Spirochaetia	Treponematales	Treponemataceae	Treponema_D	Treponema_D sp002373205
RGIG1238	China_rumen65	China rumen	Bacteria	Bacteroidota	Bacteroidia	Bacteroidales	UBA932	Bact-11
RGIG1239	China_rumen66	China rumen	Bacteria	Firmicutes_A	Clostridia	Oscillospirales	Oscillospiraceae	UBA1777	UBA1777 sp900317375
RGIG1240	China_rumen67	China rumen	#N/A	Others	Others	Others	Others	Others	Others
RGIG1241	China_rumen68	China rumen	Bacteria	Firmicutes_A	Clostridia	Oscillospirales	Oscillospiraceae	RUG626	RUG626 sp900320765
RGIG1243	China_rumen70	China rumen	Bacteria	Firmicutes_A	Clostridia	Saccharofermentanales	Saccharofermentanaceae	Saccharofermentans
RGIG1244	China_rumen71	China rumen	Bacteria	Firmicutes_A	Clostridia	Lachnospirales	Lachnospiraceae	Butyrivibrio	Butyrivibrio hungatei_B
RGIG1245	China_rumen72	China rumen	Bacteria	Firmicutes_A	Clostridia	Oscillospirales	Oscillospiraceae
RGIG1246	China_rumen73	China rumen	Bacteria	Bacteroidota	Bacteroidia	Bacteroidales	Paludibacteraceae	RF16
RGIG1248	China_rumen75	China rumen	Bacteria	Firmicutes_A	Clostridia_A	Christensenellales	CAG-138	UBA3857
RGIG1249	China_rumen76	China rumen	Bacteria	Firmicutes_C	Negativicutes	Selenomonadales	Selenomonadaceae	Schwartzia	Schwartzia succinivorans
RGIG1251	China_rumen78	China rumen	Bacteria	Bacteroidota	Bacteroidia	Bacteroidales	Bacteroidaceae	Prevotella
RGIG1252	China_rumen79	China rumen	Bacteria	Firmicutes_A	Clostridia	Lachnospirales	Lachnospiraceae	Clostridium_R	Clostridium_R sp003445895
RGIG1253	China_rumen80	China rumen	Bacteria	Desulfobacterota	Desulfovibrionia	Desulfovibrionales	Desulfovibrionaceae	Desulfovibrio
RGIG1254	China_rumen81	China rumen	Bacteria	Planctomycetota	Planctomycetes	Pirellulales	Thermoguttaceae
RGIG1255	China_rumen82	China rumen	Bacteria	Bacteroidota	Bacteroidia	Bacteroidales	Bacteroidaceae	Prevotella	Prevotella sp900314715
RGIG1256	China_rumen83	China rumen	Bacteria	Elusimicrobiota	Endomicrobia	Endomicrobiales	Endomicrobiaceae	RUG658
RGIG1257	China_rumen84	China rumen	Bacteria	Bacteroidota	Bacteroidia	Bacteroidales	UBA932	RC9
RGIG1258	China_rumen85	China rumen	Bacteria	Bacteroidota	Bacteroidia	Bacteroidales	Bacteroidaceae	UBA4372	UBA4372 sp900320715
RGIG1259	China_rumen86	China rumen	Bacteria	Firmicutes_A	Clostridia	Lachnospirales	Lachnospiraceae	UBA1267
RGIG1260	China_rumen87	China rumen	Bacteria	Firmicutes	Bacilli	Erysipelotrichales	Erysipelotrichaceae
RGIG1261	China_rumen88	China rumen	Bacteria	Bacteroidota	Bacteroidia	Bacteroidales	Muribaculaceae	C941
RGIG1262	China_rumen89	China rumen	Bacteria	Bacteroidota	Bacteroidia	Bacteroidales	ML635J-15	Bact-19
RGIG1264	China_rumen91	China rumen	Bacteria	Firmicutes	Bacilli	Erysipelotrichales	Erysipelotrichaceae	UBA636	UBA636 sp900321955
RGIG1265	China_rumen92	China rumen	Bacteria	Bacteroidota	Bacteroidia	Bacteroidales	UBA932	Bact-11
RGIG1266	China_rumen93	China rumen	Bacteria	Firmicutes_A	Clostridia	Oscillospirales	Oscillospiraceae	UBA1777	UBA1777 sp900317375
RGIG1267	China_rumen94	China rumen	Bacteria	Bacteroidota	Bacteroidia	Bacteroidales	Muribaculaceae	C941
RGIG1268	China_rumen95	China rumen	Bacteria	Spirochaetota	Spirochaetia	Treponematales	Treponemataceae	Treponema_D	Treponema_D sp900316905
RGIG1269	China_rumen96	China rumen	Bacteria	Spirochaetota	Spirochaetia	Treponematales	Treponemataceae	Treponema_D	Treponema_D sp002373205
RGIG1270	China_rumen97	China rumen	Bacteria	Bacteroidota	Bacteroidia	Bacteroidales	Bacteroidaceae	Prevotella
RGIG1271	China_rumen98	China rumen	Bacteria	Bacteroidota	Bacteroidia	Bacteroidales	UBA932
RGIG1273	China_rumen100	China rumen	Bacteria	Firmicutes_A	Clostridia	Oscillospirales	Acutalibacteraceae	Ruminococcus_E	Ruminococcus_E sp900317315
RGIG1274	China_rumen101	China rumen	Bacteria	Bacteroidota	Bacteroidia	Bacteroidales	UBA932	RC9
RGIG1275	China_rumen102	China rumen	Bacteria	Firmicutes_A	Clostridia	Peptostreptococcales	Anaerovoracaceae	UBA1764
RGIG1277	China_rumen104	China rumen	Bacteria	Firmicutes	Bacilli	RFN20	CAG-826	UBA733	UBA733 sp900316365
RGIG1278	China_rumen105	China rumen	Bacteria	Bacteroidota	Bacteroidia	Bacteroidales	Paludibacteraceae	RUG163
RGIG1279	China_rumen106	China rumen	Bacteria	Firmicutes_A	Clostridia	Oscillospirales	Acutalibacteraceae	UBA6857
RGIG1280	China_rumen107	China rumen	Bacteria	Planctomycetota	Planctomycetes	Pirellulales	Thermoguttaceae
RGIG1281	China_rumen108	China rumen	Bacteria	Bacteroidota	Bacteroidia	Bacteroidales	Paludibacteraceae	UBA4345	UBA4345 sp002362105
RGIG1282	China_rumen109	China rumen	Bacteria	Bacteroidota	Bacteroidia	Bacteroidales	Bacteroidaceae	Prevotella	Prevotella sp900314715
RGIG1283	China_rumen110	China rumen	Bacteria	Firmicutes	Bacilli	RF39	CAG-1000	UBA11963
RGIG1284	China_rumen111	China rumen	Bacteria	Bacteroidota	Bacteroidia	Bacteroidales	Bacteroidaceae	Prevotella	Prevotella sp002353585
RGIG1285	China_rumen112	China rumen	Bacteria	Firmicutes_A	Clostridia	Lachnospirales	Lachnospiraceae	TWA4
RGIG1286	China_rumen113	China rumen	Bacteria	Firmicutes_A	Clostridia	Lachnospirales	Lachnospiraceae	CAG-791
RGIG1287	China_rumen114	China rumen	Bacteria	Firmicutes_A	Clostridia	Oscillospirales	Acutalibacteraceae	Ruminococcus_E
RGIG1288	China_rumen115	China rumen	Bacteria	Bacteroidota	Bacteroidia	Bacteroidales	ML635J-15	Bact-19
RGIG1289	China_rumen116	China rumen	Bacteria	Spirochaetota	Spirochaetia	Treponematales	Treponemataceae	Treponema_D	Treponema_D sp002448445
RGIG1290	China_rumen117	China rumen	Bacteria	Bacteroidota	Bacteroidia	Bacteroidales	UBA932	RC9
RGIG1292	China_rumen119	China rumen	Bacteria	Firmicutes_A	Clostridia	Lachnospirales	Lachnospiraceae	ISDg
RGIG1293	China_rumen120	China rumen	Bacteria	Firmicutes_A	Clostridia	Oscillospirales	Oscillospiraceae	RUG626	RUG626 sp900317385
RGIG1294	China_rumen121	China rumen	Bacteria	Bacteroidota	Bacteroidia	Bacteroidales	UBA932	RC9
RGIG1295	China_rumen122	China rumen	Bacteria	Bacteroidota	Bacteroidia	Bacteroidales	UBA932	RC9	RC9 sp900167925
RGIG1296	China_rumen123	China rumen	Bacteria	Firmicutes	Bacilli	Erysipelotrichales	Erysipelotrichaceae	UBA636	UBA636 sp900321955
RGIG1297	China_rumen124	China rumen	Bacteria	Firmicutes_A	Clostridia	Oscillospirales	Acutalibacteraceae	RUG420
RGIG1298	China_rumen125	China rumen	Bacteria	Firmicutes_A	Clostridia	Lachnospirales	Lachnospiraceae	UBA2856
RGIG1299	China_rumen126	China rumen	Bacteria	Firmicutes_A	Clostridia	Saccharofermentanales	Saccharofermentanaceae	Saccharofermentans
RGIG1300	China_rumen127	China rumen	Bacteria	Firmicutes_A	Clostridia	Lachnospirales	UBA1390	RUG760	RUG760 sp900322165
RGIG1301	China_rumen128	China rumen	Bacteria	Firmicutes_A	Clostridia	Oscillospirales	Ruminococcaceae
RGIG1302	China_rumen129	China rumen	Bacteria	Bacteroidota	Bacteroidia	Bacteroidales	Paludibacteraceae	RF16
RGIG1303	China_rumen130	China rumen	Bacteria	Bacteroidota	Bacteroidia	Bacteroidales	Bacteroidaceae	UBA4372	UBA4372 sp900320715
RGIG1304	China_rumen131	China rumen	Bacteria	Firmicutes_A	Clostridia	Peptostreptococcales	Anaerovoracaceae	UBA1764
RGIG1305	China_rumen132	China rumen	Bacteria	Bacteroidota	Bacteroidia	Bacteroidales	UBA932	RC9	RC9 sp900321245
RGIG1306	China_rumen133	China rumen	Bacteria	Bacteroidota	Bacteroidia	Bacteroidales	UBA932	RC9
RGIG1307	China_rumen134	China rumen	Bacteria	Verrucomicrobiota	Kiritimatiellae	RFP12	UBA1067	RUG572
RGIG1308	China_rumen135	China rumen	Bacteria	Firmicutes_A	Clostridia	Oscillospirales	CAG-272	UMGS1696
RGIG1309	China_rumen136	China rumen	Bacteria	Firmicutes_C	Negativicutes	Selenomonadales	Selenomonadaceae	Selenomonas_A	Selenomonas_A sp000686945
RGIG1310	China_rumen137	China rumen	Bacteria	Bacteroidota	Bacteroidia	Bacteroidales	UBA932	RC9
RGIG1312	China_rumen139	China rumen	Bacteria	Firmicutes	Bacilli	Mycoplasmatales	Mycoplasmoidaceae
RGIG1313	China_rumen140	China rumen	Bacteria	Planctomycetota	Planctomycetes	Pirellulales	Thermoguttaceae
RGIG1315	China_rumen142	China rumen	Bacteria	Firmicutes_A	Clostridia	Saccharofermentanales	Saccharofermentanaceae	Firm-16
RGIG1316	China_rumen143	China rumen	Bacteria	Bacteroidota	Bacteroidia	Bacteroidales	Bacteroidaceae	Prevotella
RGIG1318	China_rumen145	China rumen	Bacteria	Bacteroidota	Bacteroidia	Bacteroidales	UBA932	RC9
RGIG1319	China_rumen146	China rumen	Bacteria	Bacteroidota	Bacteroidia	Bacteroidales	P3	UBA1217
RGIG1320	China_rumen147	China rumen	Bacteria	Bacteroidota	Bacteroidia	Bacteroidales	F082	F082
RGIG1321	China_rumen148	China rumen	Bacteria	Bacteroidota	Bacteroidia	Bacteroidales	UBA1715	UBA1715	UBA1715 sp002371705
RGIG1322	China_rumen149	China rumen	Bacteria	Firmicutes_A	Clostridia	Oscillospirales	Ruminococcaceae
RGIG1323	China_rumen150	China rumen	Bacteria	Bacteroidota	Bacteroidia	Bacteroidales	UBA932	Bact-11
RGIG1324	China_rumen151	China rumen	Bacteria	Firmicutes_A	Clostridia	Lachnospirales	Lachnospiraceae	Butyrivibrio	Butyrivibrio hungatei_B
RGIG1325	China_rumen152	China rumen	Bacteria	Firmicutes_A	Clostridia	Saccharofermentanales	Saccharofermentanaceae	Saccharofermentans
RGIG1326	China_rumen153	China rumen	Bacteria	Firmicutes_A	Clostridia	Oscillospirales	Oscillospiraceae	RUG626	RUG626 sp900317385
RGIG1327	China_rumen154	China rumen	Bacteria	Elusimicrobiota	Endomicrobia	Endomicrobiales	Endomicrobiaceae	RUG658
RGIG1328	China_rumen155	China rumen	Bacteria	Proteobacteria	Alphaproteobacteria	Paracaedibacterales	UBA11393
RGIG1329	China_rumen156	China rumen	Bacteria	Bacteroidota	Bacteroidia	Bacteroidales	Salinivirgaceae
RGIG1330	China_rumen157	China rumen	Bacteria	Firmicutes_A	Clostridia	Oscillospirales	Ruminococcaceae
RGIG1331	China_rumen158	China rumen	Bacteria	Firmicutes_A	Clostridia	Oscillospirales	Acutalibacteraceae	Ruminococcus_E	Ruminococcus_E sp900316555
RGIG1332	China_rumen159	China rumen	Bacteria	Bacteroidota	Bacteroidia	Bacteroidales	Bacteroidaceae	Prevotella
RGIG1333	China_rumen160	China rumen	Bacteria	Bacteroidota	Bacteroidia	Bacteroidales	Bacteroidaceae	UBA4372
RGIG1334	China_rumen161	China rumen	Bacteria	Bacteroidota	Bacteroidia	Bacteroidales	UBA932	RC9
RGIG1335	China_rumen162	China rumen	Bacteria	Bacteroidota	Bacteroidia	Bacteroidales	Muribaculaceae	C941
RGIG1336	China_rumen163	China rumen	Bacteria	Firmicutes	Bacilli	Erysipelotrichales	Erysipelotrichaceae	UBA636	UBA636 sp900321955
RGIG1337	China_rumen164	China rumen	Bacteria	Firmicutes_A	Clostridia	Oscillospirales	Acutalibacteraceae	Ruminococcus_E	Ruminococcus_E sp900317315
RGIG1338	China_rumen165	China rumen	Bacteria	Firmicutes_A	Clostridia	Oscillospirales	CAG-272	UMGS1696
RGIG1339	China_rumen166	China rumen	Bacteria	Bacteroidota	Bacteroidia	Bacteroidales	Bacteroidaceae	UBA4372	UBA4372 sp900320715
RGIG1340	China_rumen167	China rumen	Bacteria	Firmicutes_A	Clostridia	Peptostreptococcales	Anaerovoracaceae	RUG100
RGIG1341	China_rumen168	China rumen	Bacteria	Bacteroidota	Bacteroidia	Bacteroidales	Muribaculaceae	C941
RGIG3429	China_rumen294	China rumen	Bacteria	Firmicutes_A	Clostridia_A	Christensenellales	CAG-138	RUG472
RGIG3430	China_rumen295	China rumen	Bacteria	Firmicutes	Bacilli	RF39	CAG-822	UBA5578
RGIG3431	China_rumen296	China rumen	Bacteria	Firmicutes_A	Clostridia	Oscillospirales	CAG-272	CAG-448
RGIG3432	China_rumen297	China rumen	Bacteria	Bacteroidota	Bacteroidia	Bacteroidales	Bacteroidaceae	UBA4334	UBA4334 sp900316975
RGIG3433	China_rumen298	China rumen	Bacteria	Synergistota	Synergistia	Synergistales	Aminobacteriaceae
RGIG3434	China_rumen299	China rumen	Bacteria	Bacteroidota	Bacteroidia	Bacteroidales	Bacteroidaceae	UBA4334
RGIG3437	China_rumen302	China rumen	Bacteria	Firmicutes_A	Clostridia	Oscillospirales	CAG-272
RGIG3435	China_rumen300	China rumen	Bacteria	Bacteroidota	Bacteroidia	Bacteroidales	Bacteroidaceae	UBA4372
RGIG3436	China_rumen301	China rumen	Bacteria	Firmicutes_A	Clostridia	Oscillospirales	CAG-272	UMGS1865
RGIG3438	China_rumen303	China rumen	Bacteria	Firmicutes_A	Clostridia	Oscillospirales	CAG-272
RGIG3439	China_rumen304	China rumen	Bacteria	Firmicutes_A	Clostridia	Oscillospirales	Ruminococcaceae	Ruminococcus_D
RGIG3445	China_rumen310	China rumen	Bacteria	Firmicutes_A	Clostridia_A	Christensenellales	CAG-74	RUG756
RGIG3440	China_rumen305	China rumen	Bacteria	Proteobacteria	Alphaproteobacteria	Rs-D84	Rs-D84	Rs-D84
RGIG3441	China_rumen306	China rumen	Bacteria	Spirochaetota	Spirochaetia	Treponematales	Treponemataceae	Treponema_D
RGIG3442	China_rumen307	China rumen	Bacteria	Synergistota	Synergistia	Synergistales	Aminobacteriaceae
RGIG3443	China_rumen308	China rumen	Bacteria	Firmicutes_A	Clostridia	Lachnospirales	Lachnospiraceae	UBA6987
RGIG3444	China_rumen309	China rumen	Bacteria	Firmicutes_A	Clostridia	Lachnospirales	Lachnospiraceae	Pseudobutyrivibrio
RGIG3446	China_rumen311	China rumen	Bacteria	Synergistota	Synergistia	Synergistales	Aminobacteriaceae
RGIG3447	China_rumen312	China rumen	Bacteria	Verrucomicrobiota	Kiritimatiellae	RFP12	UBA1067
RGIG3448	China_rumen313	China rumen	Bacteria	Bacteroidota	Bacteroidia	Bacteroidales	Paludibacteraceae	RF16
RGIG3449	China_rumen314	China rumen	Bacteria	Verrucomicrobiota	Lentisphaeria	Victivallales	Victivallaceae	UBA1784
RGIG3450	China_rumen315	China rumen	Bacteria	Bacteroidota	Bacteroidia	Bacteroidales	UBA932
RGIG3451	China_rumen316	China rumen	Bacteria	Firmicutes_A	Clostridia	Oscillospirales	Acutalibacteraceae	Eubacterium_R
RGIG3452	China_rumen317	China rumen	Bacteria	Bacteroidota	Bacteroidia	Bacteroidales	Muribaculaceae	C941
RGIG3453	China_rumen318	China rumen	Bacteria	Bacteroidota	Bacteroidia	Bacteroidales	Paludibacteraceae	RF16
RGIG3454	China_rumen319	China rumen	Bacteria	Bacteroidota	Bacteroidia	Bacteroidales	Bacteroidaceae	Prevotella
RGIG3456	China_rumen321	China rumen	Bacteria	Verrucomicrobiota	Lentisphaeria	UBA1407	UBA1407
RGIG3455	China_rumen320	China rumen	Bacteria	Bacteroidota	Bacteroidia	Bacteroidales	UBA932	RC9
RGIG3457	China_rumen322	China rumen	Bacteria	Spirochaetota	Spirochaetia	Treponematales	Treponemataceae	Treponema_D
RGIG3458	China_rumen323	China rumen	Bacteria	Proteobacteria	Alphaproteobacteria	UBA3830
RGIG3459	China_rumen324	China rumen	Bacteria	Firmicutes_A	Clostridia	Oscillospirales	Oscillospiraceae	UBA1777	UBA1777 sp900317375
RGIG3460	China_rumen325	China rumen	Bacteria	Firmicutes_A	Clostridia	Lachnospirales	Lachnospiraceae	XBB2008
RGIG3461	China_rumen326	China rumen	Bacteria	Bacteroidota	Bacteroidia	Bacteroidales	Paludibacteraceae	RF16
RGIG3462	China_rumen327	China rumen	Bacteria	Verrucomicrobiota	Lentisphaeria	Victivallales	UBA1829	UBA11452
RGIG3463	China_rumen328	China rumen	Bacteria	Verrucomicrobiota	Lentisphaeria	UBA1407	UBA1407
RGIG3464	China_rumen329	China rumen	Bacteria	Firmicutes_A	Clostridia	Lachnospirales	Lachnospiraceae	Butyrivibrio
RGIG3465	China_rumen330	China rumen	Bacteria	Firmicutes_A	Clostridia	Oscillospirales	Acutalibacteraceae	UBA8612
RGIG3466	China_rumen331	China rumen	Bacteria	Patescibacteria	Saccharimonadia	Saccharimonadales	Saccharimonadaceae	UBA2866
RGIG3467	China_rumen332	China rumen	Bacteria	Bacteroidota	Bacteroidia	Bacteroidales	Muribaculaceae
RGIG3468	China_rumen333	China rumen	Bacteria	Bacteroidota	Bacteroidia	Bacteroidales	UBA3663	UBA3663
RGIG3469	China_rumen334	China rumen	Bacteria	Desulfobacterota	Desulfuromonadia
RGIG3470	China_rumen335	China rumen	Bacteria	Firmicutes_A	Clostridia	Lachnospirales	Lachnospiraceae	UBA3774
RGIG3471	China_rumen336	China rumen	Bacteria	Firmicutes_A	Clostridia	Oscillospirales	Acutalibacteraceae	RUG420
RGIG3472	China_rumen337	China rumen	Bacteria	Firmicutes_A	Clostridia	Lachnospirales	Lachnospiraceae	Eubacterium_F
RGIG3473	China_rumen338	China rumen	Bacteria	Bacteroidota	Bacteroidia	Bacteroidales	UBA4181
RGIG3474	China_rumen339	China rumen	Bacteria	Proteobacteria	Alphaproteobacteria	RF32	CAG-239	UBA1254
RGIG3475	China_rumen340	China rumen	Bacteria	Firmicutes_A	Clostridia	Oscillospirales	Acutalibacteraceae	Ruminococcus_E
RGIG3476	China_rumen341	China rumen	Bacteria	Synergistota	Synergistia	Synergistales	Aminobacteriaceae	Fretibacterium
RGIG3477	China_rumen342	China rumen	Bacteria	Firmicutes_C	Negativicutes	Selenomonadales	Selenomonadaceae	UBA7018
RGIG3478	China_rumen343	China rumen	Bacteria	Bacteroidota	Bacteroidia	Bacteroidales	UBA932
RGIG3479	China_rumen344	China rumen	Bacteria	Firmicutes_A	Clostridia	Oscillospirales	Oscillospiraceae
RGIG3480	China_rumen345	China rumen	Bacteria	Verrucomicrobiota	Kiritimatiellae	LD1-PB3	Lenti-01
RGIG3481	China_rumen346	China rumen	Bacteria	Firmicutes_A	Clostridia	Peptostreptococcales	Anaerovoracaceae	Eubacterium_B
RGIG3482	China_rumen347	China rumen	Bacteria	Proteobacteria	Alphaproteobacteria	Rs-D84	Rs-D84	Rs-D84
RGIG3483	China_rumen348	China rumen	Bacteria	Firmicutes_A	Clostridia	Lachnospirales
RGIG3484	China_rumen349	China rumen	Bacteria	Verrucomicrobiota	Kiritimatiellae	RFP12	UBA1067	UBA1067	UBA1067 sp002395905
RGIG3488	China_rumen353	China rumen	Bacteria	Synergistota	Synergistia	Synergistales	Aminobacteriaceae	Fretibacterium
RGIG3485	China_rumen350	China rumen	Bacteria	Firmicutes	Bacilli	RFN20	CAG-826	UBA733
RGIG3486	China_rumen351	China rumen	Bacteria	Firmicutes	Bacilli	Erysipelotrichales	Erysipelotrichaceae	RUG521
RGIG3487	China_rumen352	China rumen	Bacteria	Synergistota	Synergistia	Synergistales	Aminobacteriaceae	Fretibacterium
RGIG3489	China_rumen354	China rumen	Bacteria	Firmicutes_A	Clostridia_A	Christensenellales	CAG-74	RUG563
RGIG3490	China_rumen355	China rumen	Bacteria	Synergistota	Synergistia	Synergistales	Aminobacteriaceae
RGIG3491	China_rumen356	China rumen	Bacteria	Bacteroidota	Bacteroidia	Bacteroidales	Bacteroidaceae	RUG210
RGIG3492	China_rumen357	China rumen	Bacteria	Firmicutes_A	Clostridia	Oscillospirales	CAG-272	UMGS902
RGIG3493	China_rumen358	China rumen	Bacteria	Firmicutes_A	Clostridia	Oscillospirales	CAG-272	UMGS1815
RGIG3494	China_rumen359	China rumen	Bacteria	Verrucomicrobiota	Kiritimatiellae	RFP12	UBA3636	UBA3636
RGIG3495	China_rumen360	China rumen	Bacteria	Firmicutes_A	Clostridia	TANB77
RGIG3496	China_rumen361	China rumen	Bacteria	Bacteroidota	Bacteroidia	Bacteroidales	Bacteroidaceae	Prevotella	Prevotella sp900320445
RGIG3497	China_rumen362	China rumen	Bacteria	Bacteroidota	Bacteroidia	Bacteroidales	Paludibacteraceae	RF16
RGIG3498	China_rumen363	China rumen	Bacteria	Desulfobacterota	Desulfovibrionia	Desulfovibrionales	Desulfovibrionaceae	Desulfovibrio
RGIG3499	China_rumen364	China rumen	Bacteria	Spirochaetota	Spirochaetia	Treponematales	Treponemataceae	Treponema_D
RGIG3500	China_rumen365	China rumen	Bacteria	Firmicutes	Bacilli	RFN20	CAG-826	UBA733
RGIG3501	China_rumen366	China rumen	Bacteria	Firmicutes_A	Clostridia_A	Christensenellales	CAG-74	SFMI01
RGIG3502	China_rumen367	China rumen	Bacteria	Desulfobacterota	Desulfovibrionia	Desulfovibrionales	Desulfovibrionaceae	Desulfovibrio
RGIG3503	China_rumen368	China rumen	Bacteria	Firmicutes_A	Clostridia	Oscillospirales	Oscillospiraceae	CAG-83
RGIG3505	China_rumen370	China rumen	Bacteria	Bacteroidota	Bacteroidia	Bacteroidales	Paludibacteraceae	RF16
RGIG3504	China_rumen369	China rumen	Bacteria	Firmicutes	Bacilli	RF39	CAG-1000	UBA6985
RGIG3510	China_rumen375	China rumen	Bacteria	Bacteroidota	Bacteroidia	Bacteroidales	UBA932	RC9
RGIG3506	China_rumen371	China rumen	Bacteria	Firmicutes	Bacilli	ML615J-28	CAG-698
RGIG3507	China_rumen372	China rumen	Bacteria	Bacteroidota	Bacteroidia	Bacteroidales	Bacteroidaceae	UBA4372
RGIG3508	China_rumen373	China rumen	Bacteria	Armatimonadota	UBA5829	UBA5829	UBA5829
RGIG3509	China_rumen374	China rumen	Bacteria	Firmicutes_A	Clostridia	Lachnospirales	CAG-274	UBA3680
RGIG3514	China_rumen379	China rumen	Bacteria	Bacteroidota	Bacteroidia	Bacteroidales	UBA932	RC9
RGIG3511	China_rumen376	China rumen	Bacteria	Bacteroidota	Bacteroidia	Bacteroidales	Bacteroidaceae	UBA4372
RGIG3512	China_rumen377	China rumen	#N/A	Others	Others	Others	Others	Others	Others
RGIG3513	China_rumen378	China rumen	Bacteria	Firmicutes_A	Clostridia	Oscillospirales	Butyricicoccaceae
RGIG3515	China_rumen380	China rumen	Bacteria	Firmicutes_A	Clostridia_A	Christensenellales	Borkfalkiaceae
RGIG3516	China_rumen381	China rumen	Bacteria	Firmicutes_A	Clostridia_A	Christensenellales	UMGS1908	UMGS2070
RGIG3517	China_rumen382	China rumen	Bacteria	Firmicutes_C	Negativicutes	Selenomonadales	Selenomonadaceae	UBA7018
RGIG3518	China_rumen383	China rumen	Bacteria	Bacteroidota	Bacteroidia	Bacteroidales	UBA932
RGIG3519	China_rumen384	China rumen	Bacteria	Firmicutes_A	Clostridia	UBA1212	UBA1212	UBA1212
RGIG3520	China_rumen385	China rumen	Bacteria	Firmicutes_A	Clostridia	Oscillospirales	Oscillospiraceae	RUG626
RGIG3521	China_rumen386	China rumen	Bacteria	Bacteroidota	Bacteroidia	Bacteroidales	Paludibacteraceae
RGIG3522	China_rumen387	China rumen	Bacteria	Firmicutes_A	Clostridia_A	Christensenellales	UMGS1908	UMGS2069
RGIG3526	China_rumen391	China rumen	Bacteria	Firmicutes_A	Clostridia	Oscillospirales	CAG-272	UMGS1696
RGIG3523	China_rumen388	China rumen	Bacteria	Bacteroidota	Bacteroidia	Bacteroidales	UBA932	RC9	RC9 sp900316675
RGIG3524	China_rumen389	China rumen	Bacteria	Firmicutes_A	Clostridia	Lachnospirales	Lachnospiraceae	Pseudobutyrivibrio
RGIG3525	China_rumen390	China rumen	Bacteria	Cyanobacteria	Vampirovibrionia	Gastranaerophilales	Gastranaerophilaceae
RGIG3530	China_rumen395	China rumen	Bacteria	Bacteroidota	Bacteroidia	Bacteroidales	Paludibacteraceae	RF16
RGIG3527	China_rumen392	China rumen	Bacteria	Firmicutes_A	Clostridia	Oscillospirales	Oscillospiraceae	UBA1777
RGIG3528	China_rumen393	China rumen	Bacteria	Firmicutes_A	Clostridia	Lachnospirales	Lachnospiraceae
RGIG3529	China_rumen394	China rumen	Bacteria	Firmicutes_C	Negativicutes	Selenomonadales	Selenomonadaceae	UBA7018
RGIG3531	China_rumen396	China rumen	Bacteria	Firmicutes	Bacilli	Acholeplasmatales	Anaeroplasmataceae
RGIG3532	China_rumen397	China rumen	Bacteria	Spirochaetota	Spirochaetia	Sphaerochaetales	Sphaerochaetaceae	UBA9732
RGIG3533	China_rumen398	China rumen	Bacteria	Firmicutes_A	Clostridia	Saccharofermentanales	Saccharofermentanaceae	Saccharofermentans
RGIG3534	China_rumen399	China rumen	Bacteria	Firmicutes_A	Clostridia	Lachnospirales	Lachnospiraceae	NK4A144
RGIG3535	China_rumen400	China rumen	Bacteria	Proteobacteria	Gammaproteobacteria	Burkholderiales	Rhodocyclaceae	UBA2357
RGIG3536	China_rumen401	China rumen	Bacteria	Proteobacteria	Alphaproteobacteria	RF32	CAG-239	RUG410
RGIG3537	China_rumen402	China rumen	Bacteria	Bacteroidota	Bacteroidia	Bacteroidales	Bacteroidaceae	RUG210
RGIG3538	China_rumen403	China rumen	Bacteria	Firmicutes_A	Clostridia	Oscillospirales	Acutalibacteraceae	RUG806
RGIG3539	China_rumen404	China rumen	Bacteria	Bacteroidota	Bacteroidia	Bacteroidales	UBA932	Bact-11
RGIG3541	China_rumen406	China rumen	Bacteria	Firmicutes_A	Clostridia_A	Christensenellales	CAG-1252
RGIG3540	China_rumen405	China rumen	Bacteria	Bacteroidota	Bacteroidia	Bacteroidales	Paludibacteraceae	RF16
RGIG3542	China_rumen407	China rumen	Bacteria	Firmicutes_A	Clostridia	Oscillospirales	CAG-382
RGIG3543	China_rumen408	China rumen	Bacteria	Bacteroidota	Bacteroidia	Bacteroidales	Bacteroidaceae	Prevotella
RGIG3544	China_rumen409	China rumen	Bacteria	Firmicutes_C	Negativicutes	Selenomonadales	Selenomonadaceae	RUG643
RGIG3545	China_rumen410	China rumen	Bacteria	Bacteroidota	Bacteroidia	Bacteroidales	Bacteroidaceae	Prevotella
RGIG3546	China_rumen411	China rumen	Bacteria	UBA3054	UBA3054	UBA3054	UBA3054	UBA3054
RGIG3547	China_rumen412	China rumen	Bacteria	Synergistota	Synergistia	Synergistales	Aminobacteriaceae
RGIG3548	China_rumen413	China rumen	Bacteria	Firmicutes_A	Clostridia	Lachnospirales	Lachnospiraceae
RGIG3549	China_rumen414	China rumen	Bacteria	Firmicutes_C	Negativicutes	Selenomonadales	Selenomonadaceae	UBA3796
RGIG3550	China_rumen415	China rumen	Bacteria	Synergistota	Synergistia	Synergistales	Aminobacteriaceae	Fretibacterium
RGIG3551	China_rumen416	China rumen	Bacteria	Firmicutes_A	Clostridia	Oscillospirales	Acutalibacteraceae	CAG-488
RGIG3584	China_rumen449	China rumen	Bacteria	Proteobacteria	Alphaproteobacteria	UBA3830	UBA3830
RGIG3552	China_rumen417	China rumen	Bacteria	Bacteroidota	Bacteroidia	Bacteroidales	WCHB1-69
RGIG3553	China_rumen418	China rumen	Bacteria	Firmicutes_A	Clostridia	Lachnospirales	Lachnospiraceae
RGIG3554	China_rumen419	China rumen	Bacteria	Firmicutes_C	Negativicutes	Selenomonadales	Selenomonadaceae	UBA7018
RGIG3555	China_rumen420	China rumen	Bacteria	Firmicutes_A	Clostridia	Oscillospirales	Oscillospiraceae
RGIG3556	China_rumen421	China rumen	Bacteria	Proteobacteria	Alphaproteobacteria	Paracaedibacterales	UBA11393
RGIG3557	China_rumen422	China rumen	Bacteria	Armatimonadota	UBA5829	UBA5829	UBA5829
RGIG3558	China_rumen423	China rumen	Bacteria	Eremiobacterota	UBP9	UBA4705	UBA4705
RGIG3559	China_rumen424	China rumen	Bacteria	Bacteroidota	Bacteroidia	Bacteroidales	Bacteroidaceae	UBA4372
RGIG3560	China_rumen425	China rumen	Bacteria	Bacteroidota	Bacteroidia	Bacteroidales	Paludibacteraceae	RF16
RGIG3561	China_rumen426	China rumen	Bacteria	Bacteroidota	Bacteroidia	Bacteroidales	Bacteroidaceae	RUG210
RGIG3565	China_rumen430	China rumen	Bacteria	Eremiobacterota	UBP9	UBA4705	UBA4705
RGIG3562	China_rumen427	China rumen	Bacteria	Proteobacteria	Alphaproteobacteria	Rickettsiales	UBA4311	UBA4311
RGIG3563	China_rumen428	China rumen	Bacteria	Proteobacteria	Alphaproteobacteria	Rickettsiales	UBA4311
RGIG3564	China_rumen429	China rumen	Bacteria	Firmicutes_A	Clostridia	Lachnospirales	Lachnospiraceae	UBA2868
RGIG3566	China_rumen431	China rumen	Bacteria	Firmicutes_A	Clostridia	Oscillospirales	Oscillospiraceae
RGIG3567	China_rumen432	China rumen	Bacteria	Bacteroidota	Bacteroidia	Bacteroidales	Bacteroidaceae	UBA4372
RGIG3568	China_rumen433	China rumen	Bacteria	Synergistota	Synergistia	Synergistales	Aminobacteriaceae
RGIG3569	China_rumen434	China rumen	Bacteria	Synergistota	Synergistia	Synergistales	Aminobacteriaceae
RGIG3570	China_rumen435	China rumen	Bacteria	Synergistota	Synergistia	Synergistales	Aminobacteriaceae
RGIG3571	China_rumen436	China rumen	Bacteria	Firmicutes_A	Clostridia	Monoglobales_A	UBA1381
RGIG3572	China_rumen437	China rumen	Bacteria	Firmicutes_A	Clostridia	Lachnospirales	Lachnospiraceae	NK4A144
RGIG3576	China_rumen441	China rumen	Bacteria	Bacteroidota	Bacteroidia	Bacteroidales	Bacteroidaceae	UBA1786
RGIG3573	China_rumen438	China rumen	Bacteria	Firmicutes_A	Clostridia_A	Christensenellales	UMGS1908	UMGS2070
RGIG3574	China_rumen439	China rumen	Bacteria	Bacteroidota	Bacteroidia	Bacteroidales	UBA932	Bact-11
RGIG3575	China_rumen440	China rumen	Bacteria	Firmicutes_A	Clostridia	Oscillospirales	Acutalibacteraceae	RUG806
RGIG3583	China_rumen448	China rumen	Bacteria	Bacteroidota	Bacteroidia	Bacteroidales	Paludibacteraceae	RF16
RGIG3577	China_rumen442	China rumen	Bacteria	Firmicutes_A	Clostridia	Oscillospirales	Oscillospiraceae	UBA1777
RGIG3578	China_rumen443	China rumen	Bacteria	Bacteroidota	Bacteroidia	Bacteroidales	Muribaculaceae	C941
RGIG3579	China_rumen444	China rumen	Bacteria	Firmicutes_A	Clostridia	Oscillospirales	Oscillospiraceae	Oscillibacter
RGIG3580	China_rumen445	China rumen	Bacteria	Firmicutes_A	Clostridia	Lachnospirales	Lachnospiraceae
RGIG3581	China_rumen446	China rumen	Bacteria	Campylobacterota	Campylobacteria	Campylobacterales	Campylobacteraceae	Campylobacter_B
RGIG3582	China_rumen447	China rumen	Bacteria	Firmicutes_A	Clostridia	Lachnospirales	Lachnospiraceae	Butyrivibrio
RGIG3620	China_rumen485	China rumen	Bacteria	Firmicutes_A	Clostridia	Lachnospirales	Lachnospiraceae	CAG-127
RGIG3585	China_rumen450	China rumen	Bacteria	Firmicutes_A	Clostridia	Lachnospirales	Lachnospiraceae	UBA2868
RGIG3586	China_rumen451	China rumen	Bacteria	Firmicutes_A	Clostridia	UMGS1883	UMGS1883
RGIG3587	China_rumen452	China rumen	Bacteria	Bacteroidota	Bacteroidia	Bacteroidales	P3	UBA1711
RGIG3588	China_rumen453	China rumen	Bacteria	Firmicutes_A	Clostridia	Peptostreptococcales	Anaerovoracaceae	RUG754
RGIG3589	China_rumen454	China rumen	Bacteria	Firmicutes_A	Clostridia	Oscillospirales	Acutalibacteraceae	UBA1425
RGIG3590	China_rumen455	China rumen	Bacteria	Spirochaetota	Spirochaetia	Treponematales	Treponemataceae	Treponema_D	Treponema_D sp002393835
RGIG3591	China_rumen456	China rumen	Bacteria	Firmicutes_A	Clostridia	Lachnospirales	Lachnospiraceae
RGIG3592	China_rumen457	China rumen	Bacteria	Firmicutes_A	Clostridia	Oscillospirales	Acutalibacteraceae	UBA1425
RGIG3593	China_rumen458	China rumen	Bacteria	Bacteroidota	Bacteroidia	Bacteroidales	F082	F082
RGIG3594	China_rumen459	China rumen	Bacteria	Bacteroidota	Bacteroidia	Bacteroidales	Bacteroidaceae	UBA2918
RGIG3597	China_rumen462	China rumen	Bacteria	Firmicutes_A	Clostridia	Oscillospirales	CAG-272	UBA1248
RGIG3595	China_rumen460	China rumen	Bacteria	Firmicutes_C	Negativicutes	Selenomonadales	Selenomonadaceae	UBA7018
RGIG3596	China_rumen461	China rumen	Bacteria	Bacteroidota	Bacteroidia	Bacteroidales	Bacteroidaceae	UBA4372
RGIG3598	China_rumen463	China rumen	Bacteria	Verrucomicrobiota	Lentisphaeria	Victivallales	Victivallaceae	UBA1784
RGIG3599	China_rumen464	China rumen	Bacteria	Bacteroidota	Bacteroidia	Bacteroidales	WCHB1-69
RGIG3600	China_rumen465	China rumen	Bacteria	Spirochaetota	Spirochaetia	Sphaerochaetales	Sphaerochaetaceae	UBA9732
RGIG3601	China_rumen466	China rumen	Bacteria	Bacteroidota	Bacteroidia	Bacteroidales	Bacteroidaceae	Prevotella
RGIG3602	China_rumen467	China rumen	Archaea	Thermoplasmatota	Thermoplasmata	Methanomassiliicoccales	Methanomethylophilaceae	MX-02
RGIG3603	China_rumen468	China rumen	Bacteria	Bacteroidota	Bacteroidia	Bacteroidales	Bacteroidaceae	Prevotella
RGIG3604	China_rumen469	China rumen	Bacteria	Firmicutes_A	Clostridia	Oscillospirales	CAG-272
RGIG3605	China_rumen470	China rumen	Bacteria	Firmicutes_C	Negativicutes	Selenomonadales	Selenomonadaceae	UBA7018
RGIG3606	China_rumen471	China rumen	Bacteria	Synergistota	Synergistia	Synergistales	Aminobacteriaceae	Fretibacterium
RGIG3607	China_rumen472	China rumen	Bacteria	Desulfobacterota	Desulfovibrionia	Desulfovibrionales	Desulfovibrionaceae	Desulfovibrio
RGIG3608	China_rumen473	China rumen	Bacteria	Firmicutes_A	Clostridia	Oscillospirales	CAG-272	CAG-448
RGIG3609	China_rumen474	China rumen	Bacteria	Bacteroidota	Bacteroidia	Bacteroidales	WCHB1-69	UBA1756
RGIG3610	China_rumen475	China rumen	Bacteria	Firmicutes_A	Clostridia	Oscillospirales	Oscillospiraceae	UBA738
RGIG3611	China_rumen476	China rumen	Bacteria	Firmicutes_A	Clostridia	Lachnospirales	Lachnospiraceae	NK4A144
RGIG3612	China_rumen477	China rumen	Bacteria	Verrucomicrobiota	Kiritimatiellae	RFP12
RGIG3613	China_rumen478	China rumen	Bacteria	Firmicutes_A	Clostridia	Oscillospirales	Acutalibacteraceae	Eubacterium_R
RGIG3614	China_rumen479	China rumen	Bacteria	Firmicutes_A	Clostridia	Oscillospirales	Acutalibacteraceae	UBA737
RGIG3615	China_rumen480	China rumen	Bacteria	Firmicutes_A	Clostridia	Lachnospirales	Lachnospiraceae	UBA3633	UBA3633 sp002392345
RGIG3616	China_rumen481	China rumen	Bacteria	Verrucomicrobiota	Lentisphaeria	Victivallales	UBA1829	UBA1732
RGIG3617	China_rumen482	China rumen	Bacteria	Firmicutes_A	Clostridia_A	Christensenellales	CAG-1252	CAG-1252
RGIG3618	China_rumen483	China rumen	Bacteria	Firmicutes_A	Clostridia	Oscillospirales	CAG-272
RGIG3619	China_rumen484	China rumen	Bacteria	Firmicutes_A	Clostridia	Oscillospirales	Oscillospiraceae
RGIG3621	China_rumen486	China rumen	Bacteria	Firmicutes_C	Negativicutes	Selenomonadales	Selenomonadaceae	UBA7018
RGIG3622	China_rumen487	China rumen	Bacteria	Bacteroidota	Bacteroidia	Bacteroidales	UBA932	RC9
RGIG3623	China_rumen488	China rumen	Bacteria	Bacteroidota	Bacteroidia	Bacteroidales	Bacteroidaceae	UBA4372
RGIG3624	China_rumen489	China rumen	Bacteria	Firmicutes_A	Clostridia	Oscillospirales	Butyricicoccaceae	UBA4644
RGIG3625	China_rumen490	China rumen	Bacteria	Firmicutes_A	Clostridia_A	Christensenellales	CAG-74	UBA4263
RGIG3628	China_rumen493	China rumen	Bacteria	Firmicutes_A	Clostridia	Lachnospirales	Lachnospiraceae	UBA2868
RGIG3626	China_rumen491	China rumen	Bacteria	Firmicutes_A	Clostridia	Oscillospirales	Oscillospiraceae	CAG-83
RGIG3627	China_rumen492	China rumen	Bacteria	Firmicutes_A	Clostridia	Oscillospirales	Acutalibacteraceae	Ruminococcus_E
RGIG3629	China_rumen494	China rumen	Bacteria	Firmicutes_A	Clostridia	Lachnospirales	Lachnospiraceae	XBB1006
RGIG3634	China_rumen499	China rumen	Bacteria	Spirochaetota	Spirochaetia	Sphaerochaetales	Sphaerochaetaceae	UBA9732
RGIG3630	China_rumen495	China rumen	Bacteria	Firmicutes_C	Negativicutes	Selenomonadales	Selenomonadaceae	RUG024
RGIG3631	China_rumen496	China rumen	Bacteria	Verrucomicrobiota	Lentisphaeria	UBA1407	UBA1407
RGIG3632	China_rumen497	China rumen	Bacteria	Firmicutes_A	Clostridia	Oscillospirales	Acutalibacteraceae	UBA737
RGIG3633	China_rumen498	China rumen	Bacteria	Firmicutes_A	Clostridia	Oscillospirales	Acutalibacteraceae	Ruminococcus_E
RGIG3635	China_rumen500	China rumen	Bacteria	Firmicutes_A	Clostridia	Oscillospirales	Ruminococcaceae	Ruminiclostridium_E
RGIG3636	China_rumen501	China rumen	Bacteria	Verrucomicrobiota	Kiritimatiellae	LD1-PB3	Lenti-01
RGIG3637	China_rumen502	China rumen	Bacteria	Bacteroidota	Bacteroidia	Bacteroidales	Bacteroidaceae	Ga6A1	Ga6A1 sp900102385
RGIG3638	China_rumen503	China rumen	Bacteria	Bacteroidota	Bacteroidia	Bacteroidales	Bacteroidaceae	UBA6382
RGIG3639	China_rumen504	China rumen	Bacteria	Firmicutes_A	Clostridia	Oscillospirales	CAG-272
RGIG3640	China_rumen505	China rumen	Bacteria	Spirochaetota	Spirochaetia
RGIG3641	China_rumen506	China rumen	Bacteria	Eremiobacterota	UBP9	UBA4705	UBA4705
RGIG3642	China_rumen507	China rumen	Bacteria	Firmicutes_A	Clostridia	Oscillospirales	Oscillospiraceae	Oscillibacter
RGIG3646	China_rumen511	China rumen	Bacteria	Bacteroidota	Bacteroidia	Bacteroidales	Bacteroidaceae	Prevotella
RGIG3643	China_rumen508	China rumen	Bacteria	Armatimonadota	UBA5829	UBA5829	UBA5829
RGIG3644	China_rumen509	China rumen	Bacteria	Firmicutes_A	Clostridia	Lachnospirales	Lachnospiraceae	NK4A144
RGIG3645	China_rumen510	China rumen	Bacteria	Bacteroidota	Bacteroidia	Bacteroidales	Bacteroidaceae	UBA4334
RGIG3647	China_rumen512	China rumen	Bacteria	Firmicutes_A	Clostridia_A	Christensenellales	CAG-74	SFMI01
RGIG3648	China_rumen513	China rumen	Bacteria	Firmicutes_C	Negativicutes	Selenomonadales	Selenomonadaceae	Selenomonas_B	Selenomonas_B ruminantium_A
RGIG3649	China_rumen514	China rumen	Bacteria	Firmicutes_A	Clostridia	Lachnospirales	Lachnospiraceae	UBA3774
RGIG3650	China_rumen515	China rumen	Bacteria	Firmicutes_A	Clostridia	Lachnospirales	Lachnospiraceae	RUG191
RGIG3651	China_rumen516	China rumen	Bacteria	Planctomycetota	Planctomycetes	Pirellulales	Thermoguttaceae	RUG369
RGIG3652	China_rumen517	China rumen	Bacteria	Firmicutes_A	Clostridia	Oscillospirales	Ruminococcaceae	Ruminococcus_D
RGIG3657	China_rumen522	China rumen	Bacteria	Proteobacteria	Alphaproteobacteria	Rhizobiales	Rhizobiaceae	Phyllobacterium	Phyllobacterium sp900539805
RGIG3653	China_rumen518	China rumen	Bacteria	Firmicutes_C	Negativicutes	Selenomonadales	Selenomonadaceae	RUG643
RGIG3654	China_rumen519	China rumen	Bacteria	Firmicutes_A	Clostridia	Oscillospirales	Oscillospiraceae	CAG-110	CAG-110 sp900315595
RGIG3655	China_rumen520	China rumen	Bacteria	Synergistota	Synergistia	Synergistales	Aminobacteriaceae	Fretibacterium
RGIG3656	China_rumen521	China rumen	Bacteria	Bacteroidota	Bacteroidia	Bacteroidales	UBA932	Bact-11
RGIG3658	China_rumen523	China rumen	Bacteria	Firmicutes_A	Clostridia_A	Christensenellales	CAG-1252
RGIG3659	China_rumen524	China rumen	Bacteria	Bacteroidota	Bacteroidia	Bacteroidales	Bacteroidaceae	Prevotella
RGIG3660	China_rumen525	China rumen	Bacteria	Firmicutes_A	Clostridia_A	Christensenellales	CAG-74	SFMI01
RGIG3661	China_rumen526	China rumen	Bacteria	Bacteroidota	Bacteroidia	Bacteroidales	UBA932	RC9
RGIG3662	China_rumen527	China rumen	Bacteria	Firmicutes_A	Clostridia	Oscillospirales	Acutalibacteraceae	CAG-964
RGIG3663	China_rumen528	China rumen	Bacteria	Synergistota	Synergistia	Synergistales	Aminobacteriaceae	Fretibacterium
RGIG3664	China_rumen529	China rumen	Bacteria	Firmicutes_A	Clostridia	Oscillospirales	Acutalibacteraceae	UMGS1487
RGIG3665	China_rumen530	China rumen	Bacteria	Proteobacteria	Gammaproteobacteria	Pseudomonadales	Pseudomonadaceae	Pseudomonas	Pseudomonas aeruginosa
RGIG3666	China_rumen531	China rumen	Bacteria	Firmicutes_A	Clostridia	Oscillospirales	Oscillospiraceae	CAG-83
RGIG3667	China_rumen532	China rumen	Bacteria	Bacteroidota	Bacteroidia	Bacteroidales	P3	UBA1711
RGIG3668	China_rumen533	China rumen	Bacteria	Firmicutes_A	Clostridia	Oscillospirales	CAG-272	CAG-448
RGIG3669	China_rumen534	China rumen	Bacteria	Bacteroidota	Bacteroidia	Bacteroidales	UBA932	RC9
RGIG3670	China_rumen535	China rumen	Bacteria	Patescibacteria	Saccharimonadia	Saccharimonadales	Saccharimonadaceae	UBA2866
RGIG3671	China_rumen536	China rumen	Bacteria	Myxococcota	Bradimonadia	Bradymonadales	UBA4248	UBA4248
RGIG3672	China_rumen537	China rumen	Bacteria	Bacteroidota	Bacteroidia	Bacteroidales	Bacteroidaceae	UBA1179
RGIG3673	China_rumen538	China rumen	Bacteria	Firmicutes_A	Clostridia	Lachnospirales	Lachnospiraceae	UBA2868
RGIG3674	China_rumen539	China rumen	Bacteria	Synergistota	Synergistia	Synergistales	Aminobacteriaceae	Fretibacterium
RGIG3675	China_rumen540	China rumen	Bacteria	Bacteroidota	Bacteroidia	Bacteroidales	UBA932	RC9
RGIG3676	China_rumen541	China rumen	Bacteria	Firmicutes_A	Clostridia_A	Christensenellales	CAG-74	SFHK01
RGIG3677	China_rumen542	China rumen	Bacteria	Firmicutes_A	Clostridia	Oscillospirales	Oscillospiraceae
RGIG3698	China_rumen563	China rumen	Bacteria	Firmicutes_A	Clostridia	Lachnospirales	Lachnospiraceae
RGIG3678	China_rumen543	China rumen	Bacteria	Firmicutes_A	Clostridia	Lachnospirales	Lachnospiraceae
RGIG3679	China_rumen544	China rumen	Bacteria	Synergistota	Synergistia	Synergistales	Aminobacteriaceae
RGIG3680	China_rumen545	China rumen	Bacteria	Synergistota	Synergistia	Synergistales	Dethiosulfovibrionaceae	Pyramidobacter
RGIG3681	China_rumen546	China rumen	Bacteria	Bacteroidota	Bacteroidia	Bacteroidales	WCHB1-69
RGIG3682	China_rumen547	China rumen	Bacteria	Bacteroidota	Bacteroidia	Bacteroidales	UBA932	RC9
RGIG3683	China_rumen548	China rumen	Bacteria	Bacteroidota	Bacteroidia	Bacteroidales	Paludibacteraceae	UBA3747
RGIG3684	China_rumen549	China rumen	Bacteria	Bacteroidota	Bacteroidia	Bacteroidales	Paludibacteraceae	RF16
RGIG3685	China_rumen550	China rumen	Bacteria	Desulfobacterota	Desulfovibrionia	Desulfovibrionales	Desulfovibrionaceae	Desulfovibrio
RGIG3686	China_rumen551	China rumen	Bacteria	Firmicutes_A	Clostridia_A	Christensenellales	CAG-74	GCA-900199385	GCA-900199385 sp900320755
RGIG3687	China_rumen552	China rumen	Bacteria	Firmicutes_A	Clostridia	Oscillospirales	Acutalibacteraceae	UBA8612
RGIG3689	China_rumen554	China rumen	Bacteria	Firmicutes_A	Clostridia	Oscillospirales	CAG-272
RGIG3688	China_rumen553	China rumen	Bacteria	Desulfobacterota	Desulfovibrionia	Desulfovibrionales	Desulfovibrionaceae	Desulfovibrio
RGIG3690	China_rumen555	China rumen	Bacteria	Firmicutes	Bacilli	Erysipelotrichales	Erysipelotrichaceae	UBA636
RGIG3691	China_rumen556	China rumen	Bacteria	Firmicutes_A	Clostridia	Lachnospirales	Lachnospiraceae	NK4A144	NK4A144 sp000621405
RGIG3692	China_rumen557	China rumen	Bacteria	Verrucomicrobiota	Kiritimatiellae	RFP12	UBA1067	UBA1200
RGIG3693	China_rumen558	China rumen	Bacteria	Firmicutes_A	Clostridia	Oscillospirales	Acutalibacteraceae	CAG-488
RGIG3694	China_rumen559	China rumen	Bacteria	Firmicutes_A	Clostridia	Oscillospirales	CAG-272	CAG-390
RGIG3697	China_rumen562	China rumen	Bacteria	Firmicutes_A	Clostridia	Lachnospirales	Lachnospiraceae	UBA1267
RGIG3695	China_rumen560	China rumen	Bacteria	Verrucomicrobiota	Verrucomicrobiae	Pedosphaerales	UBA1412	UBA1412	UBA1412 sp002308515
RGIG3696	China_rumen561	China rumen	Bacteria	Synergistota	Synergistia	Synergistales	Aminobacteriaceae	Fretibacterium
RGIG3702	China_rumen567	China rumen	Bacteria	Proteobacteria	Alphaproteobacteria	UBA3830
RGIG3699	China_rumen564	China rumen	Bacteria	Firmicutes_A	Clostridia	Oscillospirales	Acutalibacteraceae	UBA1213
RGIG3700	China_rumen565	China rumen	Bacteria	Firmicutes_A	Clostridia	Oscillospirales	CAG-272	UBA11512
RGIG3701	China_rumen566	China rumen	Bacteria	Planctomycetota	Planctomycetes	Pirellulales	Thermoguttaceae
RGIG3703	China_rumen568	China rumen	Bacteria	Firmicutes_C	Negativicutes	Selenomonadales	Selenomonadaceae	UBA7018
RGIG3704	China_rumen569	China rumen	Bacteria	Firmicutes_A	Clostridia	Oscillospirales	Acutalibacteraceae	UBA6857
RGIG3705	China_rumen570	China rumen	Bacteria	Firmicutes_A	Clostridia	Oscillospirales	CAG-272	UMGS1696
RGIG3706	China_rumen571	China rumen	Bacteria	Firmicutes_A	Clostridia_A	Christensenellales	UBA4651	RUG666
RGIG3707	China_rumen572	China rumen	Bacteria	Firmicutes_A	Clostridia	Peptostreptococcales	Anaerovoracaceae	UBA3871	UBA3871 sp002392265
RGIG3708	China_rumen573	China rumen	Bacteria	Firmicutes	Bacilli	Acholeplasmatales	Anaeroplasmataceae
RGIG3709	China_rumen574	China rumen	Bacteria	Verrucomicrobiota	Lentisphaeria	UBA1407	UBA1407	UBA1407
RGIG3710	China_rumen575	China rumen	Bacteria	Bacteroidota	Bacteroidia	Bacteroidales	Muribaculaceae	C941
RGIG3711	China_rumen576	China rumen	Bacteria	Bacteroidota	Bacteroidia	Bacteroidales	UBA932	RC9
RGIG3712	China_rumen577	China rumen	Bacteria	Firmicutes	Bacilli	RFN20	CAG-826	UBA733
RGIG3713	China_rumen578	China rumen	Bacteria	Desulfobacterota	Desulfovibrionia	Desulfovibrionales	Desulfovibrionaceae	Desulfovibrio
RGIG3718	China_rumen583	China rumen	Bacteria	Verrucomicrobiota	Lentisphaeria	Victivallales	Victivallaceae	UBA1784
RGIG3714	China_rumen579	China rumen	Bacteria	Firmicutes_A	Clostridia	Oscillospirales	Oscillospiraceae
RGIG3715	China_rumen580	China rumen	Bacteria	Firmicutes_A	Clostridia	Lachnospirales	Lachnospiraceae
RGIG3716	China_rumen581	China rumen	Bacteria	Bacteroidota	Bacteroidia	Bacteroidales	UBA932	RC9
RGIG3717	China_rumen582	China rumen	Bacteria	Bacteroidota	Bacteroidia	Bacteroidales	UBA932	RC9
RGIG3719	China_rumen584	China rumen	Bacteria	Firmicutes_C	Negativicutes	Selenomonadales	Selenomonadaceae	UBA7018
RGIG3720	China_rumen585	China rumen	Bacteria	Bacteroidota	Bacteroidia	Bacteroidales	BBW3
RGIG3721	China_rumen586	China rumen	Bacteria	Firmicutes_A	Clostridia	Oscillospirales	Acutalibacteraceae	Ruminococcus_E
RGIG3722	China_rumen587	China rumen	Bacteria	Bacteroidota	Bacteroidia	Bacteroidales	UBA932	RC9	RC9 sp900317925
RGIG3723	China_rumen588	China rumen	Bacteria	Firmicutes_A	Clostridia	Oscillospirales	CAG-272
RGIG3724	China_rumen589	China rumen	Bacteria	Desulfobacterota	Desulfovibrionia	Desulfovibrionales	Desulfovibrionaceae	Desulfovibrio
RGIG3725	China_rumen590	China rumen	Bacteria	Firmicutes_A	Clostridia	Lachnospirales	Lachnospiraceae	Butyrivibrio
RGIG3726	China_rumen591	China rumen	Bacteria	Firmicutes_A	Clostridia	Oscillospirales	Butyricicoccaceae
RGIG3727	China_rumen592	China rumen	Bacteria	Desulfobacterota	Desulfovibrionia	Desulfovibrionales	Desulfovibrionaceae	Desulfovibrio
RGIG3728	China_rumen593	China rumen	Bacteria	Firmicutes_A	Clostridia	Lachnospirales	Lachnospiraceae	Acetatifactor
RGIG3729	China_rumen594	China rumen	Bacteria	Bacteroidota	Bacteroidia	Bacteroidales	P3
RGIG3730	China_rumen595	China rumen	Bacteria	Firmicutes_A	Clostridia	Oscillospirales	Ruminococcaceae	Ruminiclostridium_E
RGIG3731	China_rumen596	China rumen	Bacteria	Firmicutes_A	Clostridia_A	Christensenellales	Borkfalkiaceae	UBA1259
RGIG3732	China_rumen597	China rumen	Bacteria	Firmicutes_A	Clostridia_A	Christensenellales	Borkfalkiaceae
RGIG3733	China_rumen598	China rumen	Bacteria	Patescibacteria	Saccharimonadia	Saccharimonadales	Saccharimonadaceae	UBA2866
RGIG3734	China_rumen599	China rumen	Bacteria	Firmicutes_A	Clostridia	Lachnospirales	UBA5962
RGIG3735	China_rumen600	China rumen	Bacteria	Firmicutes_A	Clostridia	Lachnospirales	Lachnospiraceae	NK4A144
RGIG3736	China_rumen601	China rumen	Bacteria	Firmicutes_A	Clostridia	Oscillospirales	Ruminococcaceae	Ruminococcus_D	Ruminococcus_D albus_C
RGIG3737	China_rumen602	China rumen	Bacteria	Proteobacteria	Alphaproteobacteria	Rs-D84	Rs-D84	Rs-D84
RGIG3738	China_rumen603	China rumen	Bacteria	Bacteroidota	Bacteroidia	Bacteroidales	P3	UBA1711
RGIG3739	China_rumen604	China rumen	Bacteria	Firmicutes_C	Negativicutes	Selenomonadales	Selenomonadaceae	UBA7018
RGIG3740	China_rumen605	China rumen	Bacteria	Spirochaetota	Spirochaetia	Treponematales	Treponemataceae	GCA-2749205
RGIG3743	China_rumen608	China rumen	Bacteria	Spirochaetota	Spirochaetia	Treponematales	Treponemataceae	Treponema_D
RGIG3741	China_rumen606	China rumen	Bacteria	Firmicutes_A	Clostridia	Lachnospirales	Lachnospiraceae	NK4A144
RGIG3742	China_rumen607	China rumen	Bacteria	Firmicutes_A	Clostridia	Oscillospirales
RGIG3744	China_rumen609	China rumen	Bacteria	Firmicutes_A	Clostridia	Oscillospirales	Acutalibacteraceae	UBA8612
RGIG3745	China_rumen610	China rumen	Bacteria	Patescibacteria	Gracilibacteria	Absconditabacterales	X112	HOT-345
RGIG3746	China_rumen611	China rumen	Bacteria	Synergistota	Synergistia	Synergistales	Aminobacteriaceae	Fretibacterium
RGIG3749	China_rumen614	China rumen	Bacteria	Bacteroidota	Bacteroidia	Bacteroidales	UBA932	RC9
RGIG3747	China_rumen612	China rumen	Bacteria	Firmicutes_A	Clostridia	Lachnospirales	Lachnospiraceae
RGIG3748	China_rumen613	China rumen	Bacteria	Firmicutes_A	Clostridia	Oscillospirales	CAG-382_A
RGIG5023	China_rumen807	China rumen	Bacteria	Bacteroidota	Bacteroidia	Bacteroidales	Muribaculaceae	C941
RGIG5020	China_rumen804	China rumen	Bacteria	Firmicutes	Bacilli	RF39	CAG-1000	UMGS1217
RGIG5021	China_rumen805	China rumen	Bacteria	Firmicutes_A	Clostridia	Lachnospirales	Lachnospiraceae
RGIG5022	China_rumen806	China rumen	Bacteria	Firmicutes_C	Negativicutes	Selenomonadales	Selenomonadaceae	UBA7018
RGIG5025	China_rumen809	China rumen	Bacteria	Firmicutes_A	Clostridia	TANB77	CAG-508	CAG-273
RGIG5024	China_rumen808	China rumen	Bacteria	Bacteroidota	Bacteroidia	Bacteroidales	Paludibacteraceae
RGIG5026	China_rumen810	China rumen	Bacteria	Proteobacteria	Alphaproteobacteria	RF32	CAG-239	RUG410
RGIG5027	China_rumen811	China rumen	Bacteria	Firmicutes_A	Clostridia	Oscillospirales	Ruminococcaceae	Ruminococcus
RGIG5028	China_rumen812	China rumen	Bacteria	Proteobacteria	Gammaproteobacteria	Burkholderiales	Neisseriaceae	QFNR01
RGIG5029	China_rumen813	China rumen	Bacteria	Actinobacteriota	Coriobacteriia	Coriobacteriales	Atopobiaceae	UBA1367
RGIG5030	China_rumen814	China rumen	Bacteria	Bacteroidota	Bacteroidia	Bacteroidales	Bacteroidaceae	Prevotella
RGIG5031	China_rumen815	China rumen	Bacteria	Verrucomicrobiota	Kiritimatiellae	RFP12	UBA3636	UBA3636
RGIG5032	China_rumen816	China rumen	Bacteria	Firmicutes_A	Clostridia	Oscillospirales	Ruminococcaceae	Ruminiclostridium_E
RGIG5033	China_rumen817	China rumen	Bacteria	Bacteroidota	Bacteroidia	Bacteroidales	P3	UBA1711
RGIG5034	China_rumen818	China rumen	Bacteria	Bacteroidota	Bacteroidia	Bacteroidales	Bacteroidaceae	RUG210
RGIG5035	China_rumen819	China rumen	Bacteria	Firmicutes	Bacilli	RFN20	CAG-826	UBA733
RGIG5036	China_rumen820	China rumen	Bacteria	Firmicutes_A	Clostridia	Oscillospirales	Oscillospiraceae	RUG626
RGIG5037	China_rumen821	China rumen	Bacteria	Bacteroidota	Bacteroidia	Bacteroidales	P3	UBA1711
RGIG5038	China_rumen822	China rumen	Bacteria	Firmicutes_A	Clostridia	Lachnospirales	Lachnospiraceae	UBA3633	UBA3633 sp002392345
RGIG5039	China_rumen823	China rumen	Bacteria	Firmicutes_A	Clostridia	Lachnospirales	Lachnospiraceae	1XD8-76
RGIG5040	China_rumen824	China rumen	Bacteria	Firmicutes_A	Clostridia	Oscillospirales	Oscillospiraceae	NK3B98
RGIG5041	China_rumen825	China rumen	Bacteria	Verrucomicrobiota	Verrucomicrobiae	Opitutales	UBA9783	UBA3222
RGIG5042	China_rumen826	China rumen	Bacteria	Firmicutes_A	Clostridia	Lachnospirales	Lachnospiraceae	Acetatifactor
RGIG5043	China_rumen827	China rumen	Bacteria	Bacteroidota	Bacteroidia	Bacteroidales	UBA932	RC9
RGIG5044	China_rumen828	China rumen	Bacteria	Firmicutes_A	Clostridia	Lachnospirales	Lachnospiraceae	AC2028
RGIG5045	China_rumen829	China rumen	Bacteria	Firmicutes_C	Negativicutes	Selenomonadales	Selenomonadaceae	UBA7018
RGIG5046	China_rumen830	China rumen	Bacteria	Patescibacteria	Saccharimonadia	Saccharimonadales	Saccharimonadaceae	UBA2866
RGIG5047	China_rumen831	China rumen	Bacteria	Bacteroidota	Bacteroidia	Bacteroidales	UBA932	RC9
RGIG5048	China_rumen832	China rumen	Bacteria	Firmicutes_A	Clostridia_A	Christensenellales	Borkfalkiaceae
RGIG5049	China_rumen833	China rumen	Bacteria	Firmicutes_A	Clostridia	Lachnospirales	Lachnospiraceae	CAG-590
RGIG5050	China_rumen834	China rumen	Bacteria	Verrucomicrobiota	Kiritimatiellae	RFP12	UBA1067	UBA1731
RGIG5051	China_rumen835	China rumen	Bacteria	Firmicutes_A	Clostridia	Lachnospirales	Lachnospiraceae	Oribacterium
RGIG5052	China_rumen836	China rumen	Bacteria	Bacteroidota	Bacteroidia	Bacteroidales	Bacteroidaceae	Prevotella
RGIG5053	China_rumen837	China rumen	Bacteria	Firmicutes_A	Clostridia	Lachnospirales	Lachnospiraceae	NK4A144
RGIG5054	China_rumen838	China rumen	Bacteria	Firmicutes_A	Clostridia	Oscillospirales	Ruminococcaceae	Ruminococcus_D
RGIG5055	China_rumen839	China rumen	Bacteria	Firmicutes_A	Clostridia	Lachnospirales	Lachnospiraceae	Eubacterium_F	Eubacterium_F sp003453515
RGIG5056	China_rumen840	China rumen	Bacteria	Bacteroidota	Bacteroidia	Bacteroidales	Muribaculaceae	C941
RGIG5057	China_rumen841	China rumen	Bacteria	Firmicutes_A	Clostridia	TANB77	CAG-465
RGIG5058	China_rumen842	China rumen	Archaea	Thermoplasmatota	Thermoplasmata	Methanomassiliicoccales	Methanomethylophilaceae	Methanomethylophilus	Methanomethylophilus sp001560915
RGIG5059	China_rumen843	China rumen	Bacteria	Firmicutes_A	Clostridia_A	Christensenellales	Borkfalkiaceae	UBA4636
RGIG5061	China_rumen845	China rumen	Bacteria	Bacteroidota	Bacteroidia	Bacteroidales	UBA932	RC9
RGIG5062	China_rumen846	China rumen	Bacteria	Bacteroidota	Bacteroidia	Bacteroidales	Paludibacteraceae	RF16
RGIG5063	China_rumen847	China rumen	Bacteria	Firmicutes_A	Clostridia	Lachnospirales	Lachnospiraceae	NK4A144
RGIG5064	China_rumen848	China rumen	Bacteria	Bacteroidota	Bacteroidia	Bacteroidales	Bacteroidaceae	Alloprevotella
RGIG5065	China_rumen849	China rumen	Bacteria	Firmicutes_A	Clostridia_A	Christensenellales	UBA1242	UBA11517
RGIG5066	China_rumen850	China rumen	Bacteria	Cyanobacteria	Vampirovibrionia	Gastranaerophilales	Gastranaerophilaceae	UBA791
RGIG5067	China_rumen851	China rumen	Bacteria	Firmicutes_A	Clostridia	Saccharofermentanales	Saccharofermentanaceae	Saccharofermentans
RGIG5068	China_rumen852	China rumen	Bacteria	Firmicutes_A	Clostridia	Lachnospirales	Lachnospiraceae	UBA2856
RGIG5069	China_rumen853	China rumen	Bacteria	Firmicutes_A	Clostridia	Lachnospirales	Lachnospiraceae	UBA2868
RGIG5070	China_rumen854	China rumen	Bacteria	Synergistota	Synergistia	Synergistales	Dethiosulfovibrionaceae	Pyramidobacter
RGIG5072	China_rumen856	China rumen	Bacteria	Proteobacteria	Alphaproteobacteria	RF32	CAG-239	RUG410
RGIG5073	China_rumen857	China rumen	Bacteria	Firmicutes_A	Clostridia	Oscillospirales	Ruminococcaceae	UBA3855
RGIG5074	China_rumen858	China rumen	Bacteria	Bacteroidota	Bacteroidia	Bacteroidales	Bacteroidaceae	UBA4372	UBA4372 sp002494215
RGIG5075	China_rumen859	China rumen	Bacteria	Firmicutes_A	Clostridia	Lachnospirales	Lachnospiraceae	NK4A144
RGIG5076	China_rumen860	China rumen	Bacteria	Spirochaetota	Spirochaetia	Treponematales	Treponemataceae	Treponema_D
RGIG5078	China_rumen862	China rumen	Bacteria	Proteobacteria	Alphaproteobacteria	RF32	CAG-239	UBA1254
RGIG5077	China_rumen861	China rumen	Bacteria	Verrucomicrobiota	Kiritimatiellae	RFP12	UBA1067	UBA1067
RGIG5079	China_rumen863	China rumen	Bacteria	Spirochaetota	Spirochaetia	Sphaerochaetales	Sphaerochaetaceae	Spiro-01
RGIG5080	China_rumen864	China rumen	Bacteria	Bacteroidota	Bacteroidia	Bacteroidales	Bacteroidaceae	UBA6382
RGIG5081	China_rumen865	China rumen	Bacteria	Firmicutes_A	Clostridia	Lachnospirales	Lachnospiraceae	Acetatifactor
RGIG5083	China_rumen867	China rumen	Bacteria	Bacteroidota	Bacteroidia	Bacteroidales	Muribaculaceae	C941
RGIG5082	China_rumen866	China rumen	Bacteria	Bacteroidota	Bacteroidia	Bacteroidales	Paludibacteraceae	RF16
RGIG5084	China_rumen868	China rumen	Bacteria	Spirochaetota	Spirochaetia	Sphaerochaetales	Sphaerochaetaceae	Spiro-01
RGIG5085	China_rumen869	China rumen	Bacteria	Firmicutes_A	Clostridia_A	Christensenellales	UBA4651	UBA7584
RGIG5086	China_rumen870	China rumen	Bacteria	Bacteroidota	Bacteroidia	Bacteroidales	Paludibacteraceae	RF16	RF16 sp002372135
RGIG5088	China_rumen872	China rumen	Bacteria	Bacteroidota	Bacteroidia	Bacteroidales	UBA932	RC9
RGIG5087	China_rumen871	China rumen	Bacteria	Proteobacteria	Gammaproteobacteria	Enterobacterales	Succinivibrionaceae	Ruminobacter	Ruminobacter sp900315145
RGIG5089	China_rumen873	China rumen	Bacteria	Bacteroidota	Bacteroidia	Bacteroidales	Bacteroidaceae	Prevotella
RGIG5090	China_rumen874	China rumen	Bacteria	Firmicutes	Bacilli	RF39	CAG-611	UBA3789
RGIG5091	China_rumen875	China rumen	Bacteria	Cyanobacteria	Vampirovibrionia	Gastranaerophilales	Gastranaerophilaceae	UBA6984
RGIG5092	China_rumen876	China rumen	Bacteria	Bacteroidota	Bacteroidia	Bacteroidales	Bacteroidaceae	Prevotella
RGIG5093	China_rumen877	China rumen	Bacteria	Bacteroidota	Bacteroidia	Bacteroidales	Bacteroidaceae	UBA2918
RGIG5094	China_rumen878	China rumen	Bacteria	Proteobacteria	Alphaproteobacteria	RF32	CAG-977
RGIG5095	China_rumen879	China rumen	Bacteria	Patescibacteria	Saccharimonadia	Saccharimonadales	Saccharimonadaceae	UBA2834
RGIG5096	China_rumen880	China rumen	Bacteria	Proteobacteria	Alphaproteobacteria	UBA3830
RGIG5097	China_rumen881	China rumen	Bacteria	Firmicutes_C	Negativicutes	Selenomonadales	Selenomonadaceae	UBA3796
RGIG5098	China_rumen882	China rumen	Bacteria	Bacteroidota	Bacteroidia	Bacteroidales	Rikenellaceae	Alistipes	Alistipes senegalensis
RGIG5099	China_rumen883	China rumen	Bacteria	Firmicutes_A	Clostridia	Oscillospirales	Acutalibacteraceae	Eubacterium_R
RGIG5100	China_rumen884	China rumen	Bacteria	Proteobacteria	Alphaproteobacteria	RF32	CAG-239	RUG410
RGIG5101	China_rumen885	China rumen	Bacteria	Proteobacteria	Alphaproteobacteria	Rickettsiales	UBA1997
RGIG5102	China_rumen886	China rumen	Bacteria	Firmicutes_C	Negativicutes	Selenomonadales	Selenomonadaceae	Anaerovibrio
RGIG5103	China_rumen887	China rumen	Bacteria	Bacteroidota	Bacteroidia	Bacteroidales	UBA932	UBA1232
RGIG5104	China_rumen888	China rumen	Archaea	Thermoplasmatota	Thermoplasmata	Methanomassiliicoccales	Methanomethylophilaceae
RGIG5105	China_rumen889	China rumen	Bacteria	Firmicutes_A	Clostridia	Lachnospirales	Lachnospiraceae	NK4A144
RGIG5106	China_rumen890	China rumen	Bacteria	Firmicutes_C	Negativicutes	Acidaminococcales	Acidaminococcaceae	Succiniclasticum
RGIG5107	China_rumen891	China rumen	Bacteria	Synergistota	Synergistia	Synergistales	Aminobacteriaceae
RGIG5108	China_rumen892	China rumen	Bacteria	Firmicutes_A	Clostridia	Lachnospirales	Lachnospiraceae	Eubacterium_H
RGIG5109	China_rumen893	China rumen	Bacteria	Firmicutes_A	Clostridia	Oscillospirales	Acutalibacteraceae	UBA1213
RGIG5110	China_rumen894	China rumen	Bacteria	Firmicutes_C	Negativicutes	Selenomonadales	Selenomonadaceae	UBA7018
RGIG5111	China_rumen895	China rumen	Bacteria	Spirochaetota	Spirochaetia	Sphaerochaetales	Sphaerochaetaceae	UBA9732
RGIG5112	China_rumen896	China rumen	Bacteria	Proteobacteria	Alphaproteobacteria	RF32	CAG-239	CAG-267
RGIG5113	China_rumen897	China rumen	Bacteria	Firmicutes_A	Clostridia_A	Christensenellales	CAG-74	UBA2943
RGIG5114	China_rumen898	China rumen	Bacteria	Proteobacteria	Alphaproteobacteria	Rs-D84	Rs-D84	Rs-D84
RGIG5115	China_rumen899	China rumen	Bacteria	Firmicutes_A	Clostridia	TANB77	CAG-508
RGIG5116	China_rumen900	China rumen	Bacteria	Bacteroidota	Bacteroidia	Bacteroidales	Bacteroidaceae	Prevotella
RGIG5117	China_rumen901	China rumen	Bacteria	Firmicutes_A	Clostridia	Saccharofermentanales	Saccharofermentanaceae	Saccharofermentans
RGIG5118	China_rumen902	China rumen	Bacteria	Proteobacteria	Alphaproteobacteria	RF32	CAG-239	UBA1254
RGIG5119	China_rumen903	China rumen	Bacteria	Firmicutes_A	Clostridia	Oscillospirales	Ruminococcaceae	Ruminococcus_D	Ruminococcus_D sp900318545
RGIG5120	China_rumen904	China rumen	Bacteria	Firmicutes_A	Clostridia	Oscillospirales	Acutalibacteraceae	Eubacterium_R	Eubacterium_R sp900321905
RGIG5121	China_rumen905	China rumen	Bacteria	Firmicutes_A	Clostridia	Lachnospirales	Lachnospiraceae	UBA2868
RGIG5122	China_rumen906	China rumen	Bacteria	Firmicutes_A	Clostridia	Oscillospirales	Ruminococcaceae	Ruminococcus
RGIG5123	China_rumen907	China rumen	Bacteria	Firmicutes	Bacilli	Erysipelotrichales	Erysipelotrichaceae	Bulleidia
RGIG5124	China_rumen908	China rumen	Bacteria	Elusimicrobiota	Elusimicrobia	Elusimicrobiales	Elusimicrobiaceae	UBA1436
RGIG5125	China_rumen909	China rumen	Bacteria	Cyanobacteria	Vampirovibrionia	Gastranaerophilales
RGIG4831	China_rumen615	China rumen	Bacteria	Firmicutes_A	Clostridia	Lachnospirales	CAG-274
RGIG4832	China_rumen616	China rumen	Bacteria	Bacteroidota	Bacteroidia	Bacteroidales	UBA932	RC9
RGIG4833	China_rumen617	China rumen	Bacteria	Firmicutes_A	Clostridia	Oscillospirales	Ruminococcaceae	Ruminococcus	Ruminococcus flavefaciens_R
RGIG4834	China_rumen618	China rumen	Bacteria	Bacteroidota	Bacteroidia	Bacteroidales	Bacteroidaceae	Alloprevotella	Alloprevotella sp900317635
RGIG4835	China_rumen619	China rumen	Bacteria	Synergistota	Synergistia	Synergistales	Aminobacteriaceae	Fretibacterium
RGIG4836	China_rumen620	China rumen	Bacteria	Bacteroidota	Bacteroidia	Bacteroidales	Bacteroidaceae	Prevotella
RGIG4837	China_rumen621	China rumen	Bacteria	Firmicutes_A	Clostridia	Lachnospirales	Lachnospiraceae	1XD8-76
RGIG4838	China_rumen622	China rumen	Bacteria	Proteobacteria	Alphaproteobacteria	Rickettsiales	UBA4311	UBA4311
RGIG4839	China_rumen623	China rumen	Bacteria	Firmicutes_A	Clostridia	Lachnospirales	Lachnospiraceae	UBA2868	UBA2868 sp002350465
RGIG4840	China_rumen624	China rumen	Archaea	Thermoplasmatota	Thermoplasmata	Methanomassiliicoccales	Methanomethylophilaceae	ISO4-G1
RGIG4841	China_rumen625	China rumen	Bacteria	Firmicutes_A	Clostridia	Lachnospirales	Lachnospiraceae	UBA3633
RGIG4842	China_rumen626	China rumen	Bacteria	Firmicutes_A	Clostridia	Oscillospirales	Oscillospiraceae	UBA1777
RGIG4843	China_rumen627	China rumen	Bacteria	Firmicutes_A	Clostridia	Oscillospirales	Ruminococcaceae	UBA3855
RGIG4844	China_rumen628	China rumen	Bacteria	Cyanobacteria	Vampirovibrionia	Gastranaerophilales	Gastranaerophilaceae	UBA2813
RGIG4845	China_rumen629	China rumen	Bacteria	Synergistota	Synergistia	Synergistales	Aminobacteriaceae	Fretibacterium
RGIG4846	China_rumen630	China rumen	Bacteria	Firmicutes_A	Clostridia	Oscillospirales	Acutalibacteraceae	Ruminococcus_E
RGIG4847	China_rumen631	China rumen	Bacteria	Proteobacteria	Alphaproteobacteria	Paracaedibacterales	UBA11393
RGIG4848	China_rumen632	China rumen	Bacteria	Firmicutes_A	Clostridia	Lachnospirales	Lachnospiraceae	NK4A136
RGIG4849	China_rumen633	China rumen	Bacteria	Firmicutes_C	Negativicutes	Acidaminococcales	Acidaminococcaceae	Succiniclasticum
RGIG4850	China_rumen634	China rumen	Bacteria	Bacteroidota	Bacteroidia	Bacteroidales	Paludibacteraceae	RF16
RGIG4851	China_rumen635	China rumen	Bacteria	Bacteroidota	Bacteroidia	Bacteroidales	UBA932	RC9
RGIG4852	China_rumen636	China rumen	Bacteria	Bacteroidota	Bacteroidia	Bacteroidales	Bacteroidaceae	Prevotella
RGIG4853	China_rumen637	China rumen	Bacteria	Bacteroidota	Bacteroidia	Bacteroidales	Bacteroidaceae	Prevotella
RGIG4854	China_rumen638	China rumen	Bacteria	Bacteroidota	Bacteroidia	Bacteroidales	Bacteroidaceae	UBA4372	UBA4372 sp002373535
RGIG4855	China_rumen639	China rumen	Bacteria	Bacteroidota	Bacteroidia	Bacteroidales	Bacteroidaceae	UBA3839
RGIG4856	China_rumen640	China rumen	Bacteria	Firmicutes_A	Clostridia	Lachnospirales	Lachnospiraceae
RGIG4857	China_rumen641	China rumen	Bacteria	Bacteroidota	Bacteroidia	Bacteroidales	Paludibacteraceae	RF16
RGIG4858	China_rumen642	China rumen	Bacteria	Bacteroidota	Bacteroidia	Bacteroidales	Bacteroidaceae	UBA4334	UBA4334 sp900316975
RGIG4859	China_rumen643	China rumen	Bacteria	Bacteroidota	Bacteroidia	Bacteroidales	UBA932	RC9
RGIG4860	China_rumen644	China rumen	Bacteria	Bacteroidota	Bacteroidia	Bacteroidales	Bacteroidaceae	Prevotella
RGIG4861	China_rumen645	China rumen	Bacteria	Bacteroidota	Bacteroidia	Bacteroidales	Muribaculaceae	C941
RGIG4862	China_rumen646	China rumen	Bacteria	Bacteroidota	Bacteroidia	Bacteroidales	Bacteroidaceae	Prevotella
RGIG4863	China_rumen647	China rumen	Bacteria	Bacteroidota	Bacteroidia	Bacteroidales	Bacteroidaceae	UBA4372
RGIG4864	China_rumen648	China rumen	Bacteria	Bacteroidota	Bacteroidia	Bacteroidales	UBA932	RC9	RC9 sp900317925
RGIG4865	China_rumen649	China rumen	Bacteria	Firmicutes_A	Clostridia	Oscillospirales	Oscillospiraceae
RGIG4866	China_rumen650	China rumen	Bacteria	Bacteroidota	Bacteroidia	Bacteroidales	Bacteroidaceae	Prevotella
RGIG4867	China_rumen651	China rumen	Bacteria	Firmicutes_A	Clostridia	Lachnospirales	Lachnospiraceae	Eubacterium_Q
RGIG4868	China_rumen652	China rumen	Bacteria	Bacteroidota	Bacteroidia	Bacteroidales	P3	UBA1711
RGIG4869	China_rumen653	China rumen	Bacteria	Bacteroidota	Bacteroidia	Bacteroidales	Paludibacteraceae	RF16
RGIG4870	China_rumen654	China rumen	Bacteria	Bacteroidota	Bacteroidia	Bacteroidales	F082	F082
RGIG4871	China_rumen655	China rumen	Bacteria	Bacteroidota	Bacteroidia	Bacteroidales	UBA932	RC9
RGIG4872	China_rumen656	China rumen	Bacteria	Bacteroidota	Bacteroidia	Bacteroidales	Bacteroidaceae	Prevotella
RGIG4873	China_rumen657	China rumen	Bacteria	Firmicutes_C	Negativicutes	Acidaminococcales	Acidaminococcaceae	Succiniclasticum	Succiniclasticum sp900315345
RGIG4874	China_rumen658	China rumen	Bacteria	Bacteroidota	Bacteroidia	Bacteroidales	Muribaculaceae
RGIG4875	China_rumen659	China rumen	Bacteria	Bacteroidota	Bacteroidia	Bacteroidales	UBA932	RC9
RGIG4876	China_rumen660	China rumen	Bacteria	Bacteroidota	Bacteroidia	Bacteroidales	Bacteroidaceae	UBA2918
RGIG4877	China_rumen661	China rumen	Bacteria	Firmicutes_A	Clostridia	TANB77	CAG-508
RGIG4878	China_rumen662	China rumen	Bacteria	Spirochaetota	Spirochaetia	Treponematales	Treponemataceae	Treponema_D
RGIG4879	China_rumen663	China rumen	Bacteria	Firmicutes_C	Negativicutes	Selenomonadales	Selenomonadaceae	RUG643
RGIG4880	China_rumen664	China rumen	Bacteria	Bacteroidota	Bacteroidia	Bacteroidales	Muribaculaceae	C941
RGIG4881	China_rumen665	China rumen	Bacteria	Bacteroidota	Bacteroidia	Bacteroidales	Bacteroidaceae	Prevotella
RGIG4882	China_rumen666	China rumen	Bacteria	Bacteroidota	Bacteroidia	Bacteroidales	P3	UBA1711
RGIG4883	China_rumen667	China rumen	Bacteria	Bacteroidota	Bacteroidia	Bacteroidales	Bacteroidaceae	UBA4334
RGIG4884	China_rumen668	China rumen	Bacteria	Bacteroidota	Bacteroidia	Bacteroidales	UBA932	Bact-11
RGIG4885	China_rumen669	China rumen	Bacteria	Bacteroidota	Bacteroidia	Bacteroidales	Bacteroidaceae	Prevotella
RGIG4886	China_rumen670	China rumen	Bacteria	Proteobacteria	Alphaproteobacteria	Rs-D84
RGIG4887	China_rumen671	China rumen	Bacteria	Firmicutes_A	Clostridia	Oscillospirales	Acutalibacteraceae	Ruminococcus_E
RGIG4888	China_rumen672	China rumen	Bacteria	Bacteroidota	Bacteroidia	Bacteroidales	Bacteroidaceae	Prevotella
RGIG4889	China_rumen673	China rumen	Bacteria	Firmicutes_A	Clostridia	Lachnospirales	Lachnospiraceae	NK4A144
RGIG4890	China_rumen674	China rumen	Bacteria	Firmicutes_A	Clostridia	Oscillospirales	Ruminococcaceae	UBA3855
RGIG4891	China_rumen675	China rumen	Bacteria	Firmicutes_A	Clostridia	Oscillospirales	Acutalibacteraceae	Eubacterium_R	Eubacterium_R sp900321905
RGIG4892	China_rumen676	China rumen	Bacteria	Firmicutes_A	Clostridia	Oscillospirales	Ruminococcaceae	UBA3855
RGIG4893	China_rumen677	China rumen	Bacteria	Firmicutes_A	Clostridia	Oscillospirales	Ruminococcaceae	Ruminococcus_D	Ruminococcus_D sp900318545
RGIG4894	China_rumen678	China rumen	Bacteria	Firmicutes_A	Clostridia_A	Christensenellales	CAG-74	UBA2862
RGIG4895	China_rumen679	China rumen	Bacteria	Bacteroidota	Bacteroidia	Bacteroidales	Bacteroidaceae	Prevotella
RGIG4896	China_rumen680	China rumen	Bacteria	Firmicutes_A	Clostridia	Lachnospirales	Lachnospiraceae
RGIG4897	China_rumen681	China rumen	Bacteria	Firmicutes_A	Clostridia	Oscillospirales	Oscillospiraceae	UBA1777
RGIG4898	China_rumen682	China rumen	Bacteria	Bacteroidota	Bacteroidia	Bacteroidales	Paludibacteraceae	RF16
RGIG4899	China_rumen683	China rumen	Bacteria	Bacteroidota	Bacteroidia	Bacteroidales	UBA932	RC9
RGIG4900	China_rumen684	China rumen	Bacteria	Bacteroidota	Bacteroidia	Bacteroidales	UBA932	RC9
RGIG4901	China_rumen685	China rumen	Bacteria	Bacteroidota	Bacteroidia	Bacteroidales	UBA932	RC9
RGIG4902	China_rumen686	China rumen	Bacteria	Bacteroidota	Bacteroidia	Bacteroidales	UBA932	RC9
RGIG4903	China_rumen687	China rumen	Bacteria	Firmicutes_A	Clostridia	Lachnospirales	Lachnospiraceae
RGIG4904	China_rumen688	China rumen	Bacteria	Firmicutes	Bacilli	RFN20	CAG-826	UBA4855
RGIG4905	China_rumen689	China rumen	Bacteria	Firmicutes_C	Negativicutes	Acidaminococcales	Acidaminococcaceae	Succiniclasticum
RGIG4906	China_rumen690	China rumen	Bacteria	Verrucomicrobiota	Kiritimatiellae	RFP12	UBA1067	RUG572
RGIG4907	China_rumen691	China rumen	Bacteria	Bacteroidota	Bacteroidia	Bacteroidales	Bacteroidaceae	Alloprevotella
RGIG4908	China_rumen692	China rumen	Bacteria	Proteobacteria	Alphaproteobacteria	RF32	CAG-239	CAG-495
RGIG4909	China_rumen693	China rumen	Bacteria	Firmicutes_A	Clostridia	Lachnospirales	Lachnospiraceae	CAG-590
RGIG4910	China_rumen694	China rumen	Bacteria	Firmicutes_A	Clostridia_A	Christensenellales	CAG-74	RUG563
RGIG4911	China_rumen695	China rumen	Bacteria	Spirochaetota	Spirochaetia	Sphaerochaetales	Sphaerochaetaceae	UBA9732
RGIG4912	China_rumen696	China rumen	Bacteria	Firmicutes_A	Clostridia_A	Christensenellales	CAG-74	SFMI01
RGIG4913	China_rumen697	China rumen	Bacteria	Bacteroidota	Bacteroidia	Bacteroidales	Bacteroidaceae	Phocaeicola
RGIG4914	China_rumen698	China rumen	Bacteria	Firmicutes_A	Clostridia	Oscillospirales	Ruminococcaceae	Ruminococcus
RGIG4915	China_rumen699	China rumen	Bacteria	Synergistota	Synergistia	Synergistales	Aminobacteriaceae	Fretibacterium
RGIG4916	China_rumen700	China rumen	Bacteria	Firmicutes_C	Negativicutes	Selenomonadales	Selenomonadaceae	UBA7018
RGIG4917	China_rumen701	China rumen	Bacteria	Bacteroidota	Bacteroidia	Bacteroidales	Bacteroidaceae	Prevotella
RGIG4918	China_rumen702	China rumen	Bacteria	Cyanobacteria	Vampirovibrionia	Gastranaerophilales
RGIG4920	China_rumen704	China rumen	Archaea	Methanobacteriota	Methanobacteria	Methanobacteriales	Methanobacteriaceae	Methanobrevibacter_A
RGIG4921	China_rumen705	China rumen	Bacteria	Spirochaetota	Spirochaetia	Treponematales	Treponemataceae	Treponema_D
RGIG4922	China_rumen706	China rumen	Bacteria	Cyanobacteria	Vampirovibrionia	Gastranaerophilales	Gastranaerophilaceae	UBA2813
RGIG4923	China_rumen707	China rumen	Bacteria	Firmicutes_A	Clostridia	Lachnospirales	Lachnospiraceae	Pseudobutyrivibrio
RGIG4924	China_rumen708	China rumen	Bacteria	Firmicutes_A	Clostridia_A	Christensenellales	DTU072	CAG-1782
RGIG4925	China_rumen709	China rumen	Bacteria	Proteobacteria	Alphaproteobacteria	RF32	CAG-239	RUG410
RGIG4926	China_rumen710	China rumen	Bacteria	Verrucomicrobiota	Kiritimatiellae	RFP12	UBA3636	UBA3636
RGIG4927	China_rumen711	China rumen	Bacteria	Firmicutes_A	Clostridia	Lachnospirales	Lachnospiraceae
RGIG4928	China_rumen712	China rumen	Bacteria	Bacteroidota	Bacteroidia	Bacteroidales	Paludibacteraceae	UBA3747
RGIG4929	China_rumen713	China rumen	Bacteria	Bacteroidota	Bacteroidia	Bacteroidales	P3	Phil12
RGIG4930	China_rumen714	China rumen	Bacteria	Firmicutes_A	Clostridia	Lachnospirales	Lachnospiraceae
RGIG4931	China_rumen715	China rumen	Bacteria	Firmicutes_A	Clostridia	Lachnospirales	Lachnospiraceae	Butyrivibrio
RGIG4932	China_rumen716	China rumen	Bacteria	Bacteroidota	Bacteroidia	Bacteroidales	P3
RGIG4933	China_rumen717	China rumen	Bacteria	Firmicutes_C	Negativicutes	Selenomonadales	Selenomonadaceae	UBA7018
RGIG4934	China_rumen718	China rumen	Bacteria	Bacteroidota	Bacteroidia	Bacteroidales	UBA932	RC9	RC9 sp002350615
RGIG4935	China_rumen719	China rumen	Bacteria	Bacteroidota	Bacteroidia	Bacteroidales	UBA932	RC9	RC9 sp900317925
RGIG4936	China_rumen720	China rumen	Bacteria	Spirochaetota	Spirochaetia	Treponematales	Treponemataceae	Treponema_D
RGIG4937	China_rumen721	China rumen	Bacteria	Proteobacteria	Alphaproteobacteria	RF32	CAG-239	51-20
RGIG4938	China_rumen722	China rumen	Bacteria	Firmicutes_A	Clostridia	TANB77	CAG-508	CAG-492
RGIG4939	China_rumen723	China rumen	Bacteria	Firmicutes_A	Clostridia	Lachnospirales	Lachnospiraceae	AC2028
RGIG4940	China_rumen724	China rumen	Bacteria	Bacteroidota	Bacteroidia	Bacteroidales	Bacteroidaceae	Alloprevotella
RGIG4941	China_rumen725	China rumen	Bacteria	Bacteroidota	Bacteroidia	Bacteroidales	Bacteroidaceae	UBA4334
RGIG4942	China_rumen726	China rumen	Bacteria	Firmicutes_C	Negativicutes	Acidaminococcales	Acidaminococcaceae	Succiniclasticum
RGIG4943	China_rumen727	China rumen	Bacteria	Firmicutes_A	Clostridia	Lachnospirales	Lachnospiraceae	Butyrivibrio
RGIG4944	China_rumen728	China rumen	Bacteria	Firmicutes_A	Clostridia	Oscillospirales	Ruminococcaceae	Ruminococcus_D
RGIG4945	China_rumen729	China rumen	Bacteria	Synergistota	Synergistia	Synergistales	Aminobacteriaceae	Fretibacterium
RGIG4946	China_rumen730	China rumen	Bacteria	Bacteroidota	Bacteroidia	Bacteroidales	Bacteroidaceae	Prevotella
RGIG4947	China_rumen731	China rumen	Bacteria	Bacteroidota	Bacteroidia	Bacteroidales	Bacteroidaceae	UBA4372	UBA4372 sp900318115
RGIG4948	China_rumen732	China rumen	Bacteria	Bacteroidota	Bacteroidia	Bacteroidales	Bacteroidaceae	UBA4372
RGIG4949	China_rumen733	China rumen	Bacteria	Bacteroidota	Bacteroidia	Bacteroidales	UBA932	RC9
RGIG4950	China_rumen734	China rumen	Bacteria	Synergistota	Synergistia	Synergistales	Aminobacteriaceae	Fretibacterium
RGIG4951	China_rumen735	China rumen	Bacteria	Firmicutes_A	Clostridia	Lachnospirales	Lachnospiraceae	Eubacterium_Q
RGIG4952	China_rumen736	China rumen	Bacteria	Firmicutes	Bacilli	RF39	CAG-1000	UMGS1217
RGIG4953	China_rumen737	China rumen	Bacteria	Firmicutes_A	Clostridia	Oscillospirales	Oscillospiraceae
RGIG4954	China_rumen738	China rumen	Bacteria	Firmicutes_A	Clostridia_A	Christensenellales	Borkfalkiaceae
RGIG4955	China_rumen739	China rumen	Bacteria	Cyanobacteria	Vampirovibrionia	Gastranaerophilales	Gastranaerophilaceae	UBA6984
RGIG4956	China_rumen740	China rumen	Bacteria	Firmicutes_A	Clostridia_A	Christensenellales	CAG-74	UBA2943
RGIG4957	China_rumen741	China rumen	Bacteria	Firmicutes_C	Negativicutes	Selenomonadales	Selenomonadaceae	Selenomonas_A
RGIG4958	China_rumen742	China rumen	Bacteria	Bacteroidota	Bacteroidia	Bacteroidales	Bacteroidaceae	Prevotella
RGIG4959	China_rumen743	China rumen	Bacteria	Firmicutes_A	Clostridia	Lachnospirales	Lachnospiraceae	CAG-194
RGIG4960	China_rumen744	China rumen	Bacteria	Firmicutes_C	Negativicutes	Selenomonadales	Selenomonadaceae	Anaerovibrio	Anaerovibrio lipolyticus_C
RGIG4962	China_rumen746	China rumen	Bacteria	Bacteroidota	Bacteroidia	Bacteroidales	UBA932	RC9
RGIG4963	China_rumen747	China rumen	Bacteria	Firmicutes	Bacilli	RF39	CAG-822	UBA5026
RGIG4964	China_rumen748	China rumen	Bacteria	Firmicutes_A	Clostridia	Lachnospirales	Lachnospiraceae	Acetatifactor
RGIG4965	China_rumen749	China rumen	Bacteria	Spirochaetota	Spirochaetia	Treponematales	Treponemataceae	Treponema_D
RGIG4966	China_rumen750	China rumen	Bacteria	Bacteroidota	Bacteroidia	Bacteroidales	Paludibacteraceae	RF16	RF16 sp002394335
RGIG4967	China_rumen751	China rumen	Bacteria	Firmicutes_A	Clostridia_A	Christensenellales	CAG-74	UBA4263
RGIG4968	China_rumen752	China rumen	Bacteria	Firmicutes_A	Clostridia	Oscillospirales	Acutalibacteraceae	RUG420
RGIG4969	China_rumen753	China rumen	Bacteria	Bacteroidota	Bacteroidia	Bacteroidales	UBA932	RC9
RGIG4970	China_rumen754	China rumen	Bacteria	Bacteroidota	Bacteroidia	Bacteroidales	Bacteroidaceae	Alloprevotella
RGIG4971	China_rumen755	China rumen	Bacteria	Firmicutes_A	Clostridia	Oscillospirales	Ruminococcaceae	Ruminococcus_D
RGIG4972	China_rumen756	China rumen	Bacteria	Bacteroidota	Bacteroidia	Bacteroidales	Muribaculaceae	C941
RGIG4973	China_rumen757	China rumen	Bacteria	Firmicutes_A	Clostridia	Oscillospirales	Acutalibacteraceae	Ruminococcus_E
RGIG4974	China_rumen758	China rumen	Bacteria	Bacteroidota	Bacteroidia	Bacteroidales	Bacteroidaceae	Phocaeicola
RGIG4975	China_rumen759	China rumen	Bacteria	Spirochaetota	Spirochaetia	Treponematales	Treponemataceae	Treponema_D
RGIG4976	China_rumen760	China rumen	Bacteria	Firmicutes_C	Negativicutes	Selenomonadales	Selenomonadaceae	UBA7018
RGIG4977	China_rumen761	China rumen	Bacteria	Bacteroidota	Bacteroidia	Bacteroidales	Bacteroidaceae	Alloprevotella
RGIG4978	China_rumen762	China rumen	Bacteria	Proteobacteria	Alphaproteobacteria	UBA3830	UBA3830
RGIG4979	China_rumen763	China rumen	Bacteria	Firmicutes_A	Clostridia	Oscillospirales	Acutalibacteraceae	Eubacterium_R
RGIG4980	China_rumen764	China rumen	Bacteria	Cyanobacteria	Vampirovibrionia	Gastranaerophilales	Gastranaerophilaceae	QHMH01
RGIG4981	China_rumen765	China rumen	Bacteria	Firmicutes_A	Clostridia	Lachnospirales	Lachnospiraceae	TF01-11
RGIG4982	China_rumen766	China rumen	Bacteria	Fibrobacterota	Fibrobacteria	Fibrobacterales	Fibrobacteraceae	Fibrobacter
RGIG4983	China_rumen767	China rumen	Bacteria	Firmicutes_A	Clostridia_A	Christensenellales	DTU072	CAG-1782
RGIG4984	China_rumen768	China rumen	Bacteria	Firmicutes_A	Clostridia	Lachnospirales	CAG-274
RGIG4985	China_rumen769	China rumen	Bacteria	Firmicutes_A	Clostridia	Oscillospirales	Ruminococcaceae	Ruminococcus_D
RGIG4986	China_rumen770	China rumen	Bacteria	Proteobacteria	Alphaproteobacteria	RF32	CAG-239	RUG410
RGIG4987	China_rumen771	China rumen	Bacteria	Bacteroidota	Bacteroidia	Bacteroidales	Bacteroidaceae	UBA4372
RGIG4988	China_rumen772	China rumen	Bacteria	Firmicutes_A	Clostridia	Oscillospirales	Ruminococcaceae	Ruminococcus_D
RGIG4989	China_rumen773	China rumen	Bacteria	Firmicutes_C	Negativicutes	Selenomonadales	Selenomonadaceae	RUG643
RGIG4990	China_rumen774	China rumen	Bacteria	Bacteroidota	Bacteroidia	Bacteroidales	Bacteroidaceae	Prevotella
RGIG4991	China_rumen775	China rumen	Bacteria	Firmicutes	Bacilli	RF39	CAG-1000	UMGS1217
RGIG4992	China_rumen776	China rumen	Bacteria	Firmicutes_A	Clostridia	Lachnospirales	Lachnospiraceae
RGIG4993	China_rumen777	China rumen	Bacteria	Bacteroidota	Bacteroidia	Bacteroidales	P3	UBA1711
RGIG4994	China_rumen778	China rumen	Bacteria	Firmicutes_A	Clostridia	Oscillospirales	Ruminococcaceae	Ruminococcus_D
RGIG4995	China_rumen779	China rumen	Bacteria	Firmicutes_A	Clostridia	Lachnospirales	Lachnospiraceae	Acetatifactor
RGIG4996	China_rumen780	China rumen	Bacteria	Bacteroidota	Bacteroidia	Bacteroidales	P3	Phil12
RGIG4997	China_rumen781	China rumen	Bacteria	Firmicutes_A	Clostridia	Lachnospirales	Lachnospiraceae	Eubacterium_Q
RGIG4998	China_rumen782	China rumen	Bacteria	Cyanobacteria	Vampirovibrionia	Gastranaerophilales	Gastranaerophilaceae	CAG-196
RGIG4999	China_rumen783	China rumen	Bacteria	Firmicutes_A	Clostridia	Oscillospirales	Oscillospiraceae	UMGS1766
RGIG5000	China_rumen784	China rumen	Bacteria	Proteobacteria	Alphaproteobacteria	RF32	CAG-977
RGIG5001	China_rumen785	China rumen	Bacteria	Bacteroidota	Bacteroidia	Bacteroidales	UBA932	RC9
RGIG5002	China_rumen786	China rumen	Bacteria	Bacteroidota	Bacteroidia	Bacteroidales	Bacteroidaceae	UBA4372	UBA4372 sp900318115
RGIG5003	China_rumen787	China rumen	Bacteria	Bacteroidota	Bacteroidia	Bacteroidales	UBA932	RC9	RC9 sp002361625
RGIG5004	China_rumen788	China rumen	Bacteria	Bacteroidota	Bacteroidia	Bacteroidales	Paludibacteraceae
RGIG5005	China_rumen789	China rumen	Bacteria	Firmicutes_A	Clostridia	Saccharofermentanales	Saccharofermentanaceae	Saccharofermentans
RGIG5006	China_rumen790	China rumen	Bacteria	Firmicutes_A	Clostridia	Oscillospirales	Acutalibacteraceae	UMGS1224
RGIG5007	China_rumen791	China rumen	Bacteria	Bacteroidota	Bacteroidia	Bacteroidales	P3	Phil12
RGIG5008	China_rumen792	China rumen	Bacteria	Bacteroidota	Bacteroidia	Bacteroidales	P3	UBA1711
RGIG5009	China_rumen793	China rumen	Bacteria	Bacteroidota	Bacteroidia	Bacteroidales	P3	UBA1711
RGIG5010	China_rumen794	China rumen	Bacteria	Bacteroidota	Bacteroidia	Bacteroidales	Bacteroidaceae	UBA4372
RGIG5011	China_rumen795	China rumen	Bacteria	Firmicutes_A	Clostridia	Lachnospirales	Lachnospiraceae	CAG-127
RGIG5012	China_rumen796	China rumen	Bacteria	Bacteroidota	Bacteroidia	Bacteroidales	P3	UBA1711
RGIG5013	China_rumen797	China rumen	Bacteria	Patescibacteria	Saccharimonadia	Saccharimonadales	Saccharimonadaceae	UBA2866
RGIG5014	China_rumen798	China rumen	Bacteria	Firmicutes_A	Clostridia	Oscillospirales	Acutalibacteraceae
RGIG5015	China_rumen799	China rumen	Bacteria	Bacteroidota	Bacteroidia	Bacteroidales	Bacteroidaceae	UBA4372
RGIG5016	China_rumen800	China rumen	Bacteria	Patescibacteria	Saccharimonadia	Saccharimonadales	Saccharimonadaceae	UBA2866
RGIG5017	China_rumen801	China rumen	Bacteria	Firmicutes_A	Clostridia_A	Christensenellales	CAG-74	UBA2862
RGIG5018	China_rumen802	China rumen	Bacteria	Proteobacteria	Alphaproteobacteria	RF32	CAG-239	RUG410
RGIG5019	China_rumen803	China rumen	Bacteria	Firmicutes_A	Clostridia	Oscillospirales	Acutalibacteraceae	RUG420	RUG420 sp900317085
RGIG6931	China_rumen1253	China rumen	Bacteria	Firmicutes_A	Clostridia	Lachnospirales	Lachnospiraceae	UBA1712
RGIG6932	China_rumen1254	China rumen	Bacteria	Spirochaetota	Spirochaetia	Treponematales	Treponemataceae	UBA1240
RGIG6933	China_rumen1255	China rumen	Bacteria	Bacteroidota	Bacteroidia	Bacteroidales	Bacteroidaceae	UBA4372
RGIG6934	China_rumen1256	China rumen	Bacteria	Bacteroidota	Bacteroidia	Bacteroidales	Bacteroidaceae	Prevotella
RGIG6935	China_rumen1257	China rumen	Bacteria	Firmicutes_A	Clostridia	Oscillospirales	CAG-272	UMGS1696
RGIG6936	China_rumen1258	China rumen	Bacteria	Firmicutes_A	Clostridia	Lachnospirales	Lachnospiraceae	NK4A136
RGIG6937	China_rumen1259	China rumen	Bacteria	Bacteroidota	Bacteroidia	Bacteroidales	Muribaculaceae	C941
RGIG6938	China_rumen1260	China rumen	Bacteria	Firmicutes_A	Clostridia	Oscillospirales	Ruminococcaceae	Ruminococcus
RGIG6939	China_rumen1261	China rumen	Bacteria	Firmicutes_A	Clostridia	Oscillospirales	Ruminococcaceae	Firm-04
RGIG6940	China_rumen1262	China rumen	Bacteria	Firmicutes_A	Clostridia	Oscillospirales	CAG-272	UMGS1696
RGIG6941	China_rumen1263	China rumen	Archaea	Thermoplasmatota	Thermoplasmata	Methanomassiliicoccales	Methanomethylophilaceae	ISO4-G1
RGIG6942	China_rumen1264	China rumen	Bacteria	Bacteroidota	Bacteroidia	Bacteroidales	P3	UBA1219
RGIG6943	China_rumen1265	China rumen	Bacteria	Synergistota	Synergistia	Synergistales	Aminobacteriaceae	Fretibacterium
RGIG6944	China_rumen1266	China rumen	Bacteria	Firmicutes_A	Clostridia	Lachnospirales	Lachnospiraceae
RGIG6948	China_rumen1270	China rumen	Bacteria	Firmicutes_A	Clostridia	Lachnospirales	Lachnospiraceae
RGIG6945	China_rumen1267	China rumen	Bacteria	Firmicutes_A	Clostridia	Lachnospirales	Lachnospiraceae	Eubacterium_F
RGIG6946	China_rumen1268	China rumen	Bacteria	Firmicutes	Bacilli	Erysipelotrichales	Erysipelotrichaceae	UBA636
RGIG6947	China_rumen1269	China rumen	Bacteria	Proteobacteria	Alphaproteobacteria	RF32	UBA3637	UBA3637
RGIG6950	China_rumen1272	China rumen	Bacteria	Firmicutes_A	Clostridia	Peptostreptococcales	Anaerovoracaceae	RUG754
RGIG6949	China_rumen1271	China rumen	Bacteria	Spirochaetota	Spirochaetia	Sphaerochaetales	Sphaerochaetaceae	UBA9732
RGIG6951	China_rumen1273	China rumen	Bacteria	Firmicutes_A	Clostridia_A	Christensenellales	Christensenellaceae
RGIG6952	China_rumen1274	China rumen	Bacteria	Firmicutes_A	Clostridia	TANB77	UBA1234
RGIG6953	China_rumen1275	China rumen	Bacteria	Bacteroidota	Bacteroidia	Bacteroidales	Bacteroidaceae	Prevotella	Prevotella sp900315745
RGIG6954	China_rumen1276	China rumen	Bacteria	Firmicutes	Bacilli	Erysipelotrichales	Erysipelotrichaceae
RGIG6955	China_rumen1277	China rumen	Bacteria	Firmicutes_A	Clostridia	Oscillospirales	Oscillospiraceae
RGIG6956	China_rumen1278	China rumen	Bacteria	Firmicutes_A	Clostridia	Peptostreptococcales	Anaerovoracaceae	UBA1764
RGIG6957	China_rumen1279	China rumen	Bacteria	Proteobacteria	Alphaproteobacteria	RF32	CAG-977
RGIG6958	China_rumen1280	China rumen	Bacteria	Firmicutes_A	Clostridia	Peptostreptococcales	Anaerovoracaceae	UBA1764
RGIG6959	China_rumen1281	China rumen	Bacteria	Firmicutes	Bacilli	Erysipelotrichales	Erysipelotrichaceae	Bulleidia
RGIG6960	China_rumen1282	China rumen	Bacteria	Firmicutes_A	Clostridia_A	Christensenellales	UBA1242	UBA9845
RGIG6961	China_rumen1283	China rumen	Bacteria	Verrucomicrobiota	Lentisphaeria	UBA1407	UBA1407
RGIG6964	China_rumen1286	China rumen	Bacteria	Firmicutes_A	Clostridia	Peptostreptococcales	Anaerovoracaceae	UBA1764
RGIG6962	China_rumen1284	China rumen	Bacteria	Firmicutes_A	Clostridia	Lachnospirales	Lachnospiraceae	XBD2001	XBD2001 sp900116395
RGIG6963	China_rumen1285	China rumen	Bacteria	Bacteroidota	Bacteroidia	Bacteroidales	UBA932	RC9
RGIG6965	China_rumen1287	China rumen	Bacteria	Bacteroidota	Bacteroidia	Bacteroidales	W3P20-009
RGIG6966	China_rumen1288	China rumen	Bacteria	Bacteroidota	Bacteroidia	Bacteroidales	Bacteroidaceae	Ga6A1
RGIG6967	China_rumen1289	China rumen	Bacteria	Firmicutes	Bacilli	Acholeplasmatales	Anaeroplasmataceae	Anaeroplasma
RGIG6968	China_rumen1290	China rumen	Bacteria	UBP6	UBA1177	UBA1177	UBA1177	UBA1177	UBA1177 sp002309575
RGIG6969	China_rumen1291	China rumen	Bacteria	Firmicutes_A	Clostridia	Oscillospirales	Oscillospiraceae
RGIG6970	China_rumen1292	China rumen	Bacteria	Firmicutes_A	Clostridia	Saccharofermentanales	Saccharofermentanaceae	Firm-16
RGIG6971	China_rumen1293	China rumen	Bacteria	Firmicutes_A	Clostridia	Lachnospirales	Lachnospiraceae	NK4A136
RGIG6972	China_rumen1294	China rumen	Bacteria	Firmicutes	Bacilli	Erysipelotrichales	Erysipelotrichaceae	UBA636	UBA636 sp900321955
RGIG6973	China_rumen1295	China rumen	Bacteria	Bacteroidota	Bacteroidia	Bacteroidales	Muribaculaceae	C941
RGIG6974	China_rumen1296	China rumen	Bacteria	Firmicutes_A	Clostridia	Lachnospirales	Lachnospiraceae	UBA3774
RGIG6975	China_rumen1297	China rumen	Bacteria	Firmicutes_A	Clostridia	Lachnospirales	Lachnospiraceae	UBA3775
RGIG6976	China_rumen1298	China rumen	Bacteria	Firmicutes_C	Negativicutes	Selenomonadales	Selenomonadaceae	UBA9786	UBA9786 sp003518745
RGIG6977	China_rumen1299	China rumen	Bacteria	Bacteroidota	Bacteroidia	Bacteroidales	F082	F082
RGIG6997	China_rumen1319	China rumen	Bacteria	Firmicutes_A	Clostridia	Oscillospirales	Acutalibacteraceae	UBA6857
RGIG6978	China_rumen1300	China rumen	Bacteria	Bacteroidota	Bacteroidia	Bacteroidales	UBA932	Bact-11
RGIG6979	China_rumen1301	China rumen	Bacteria	Bacteroidota	Bacteroidia	Bacteroidales	Bacteroidaceae	Prevotella
RGIG6980	China_rumen1302	China rumen	Bacteria	Bacteroidota	Bacteroidia	Bacteroidales	UBA932	RC9
RGIG6985	China_rumen1307	China rumen	Bacteria	Bacteroidota	Bacteroidia	Bacteroidales	Paludibacteraceae	RF16
RGIG6981	China_rumen1303	China rumen	Bacteria	Bacteroidota	Bacteroidia	Bacteroidales	P3	UBA1711
RGIG6982	China_rumen1304	China rumen	Bacteria	Cyanobacteria	Vampirovibrionia	Gastranaerophilales
RGIG6983	China_rumen1305	China rumen	Bacteria	Firmicutes_A	Clostridia	Lachnospirales	Lachnospiraceae	AC2028
RGIG6984	China_rumen1306	China rumen	Bacteria	Firmicutes_A	Clostridia_A	Christensenellales	CAG-74	SFMI01
RGIG6986	China_rumen1308	China rumen	Bacteria	Bacteroidota	Bacteroidia	Bacteroidales	UBA932	RC9
RGIG6987	China_rumen1309	China rumen	Bacteria	Firmicutes_A	Clostridia	Lachnospirales	Lachnospiraceae	UBA1258
RGIG6988	China_rumen1310	China rumen	Bacteria	Spirochaetota	Spirochaetia	Treponematales	Treponemataceae	Treponema_D
RGIG6989	China_rumen1311	China rumen	Bacteria	Bacteroidota	Bacteroidia	Bacteroidales	UBA3824	UBA3824
RGIG6990	China_rumen1312	China rumen	Bacteria	Campylobacterota	Campylobacteria	Campylobacterales	Campylobacteraceae	Campylobacter_B
RGIG6991	China_rumen1313	China rumen	Bacteria	Firmicutes_A	Clostridia	Lachnospirales	Lachnospiraceae	UBA6987
RGIG6992	China_rumen1314	China rumen	Bacteria	Bacteroidota	Bacteroidia	Bacteroidales	UBA932	RC9
RGIG6993	China_rumen1315	China rumen	Bacteria	Spirochaetota	Spirochaetia	Treponematales	Treponemataceae	Treponema_D
RGIG6994	China_rumen1316	China rumen	Bacteria	Firmicutes_A	Clostridia	Monoglobales_A	UBA1381	UBA1738
RGIG6995	China_rumen1317	China rumen	Bacteria	Firmicutes_A	Clostridia	Lachnospirales	Lachnospiraceae	UBA2868
RGIG6996	China_rumen1318	China rumen	Bacteria	Verrucomicrobiota	Kiritimatiellae	RFP12	UBA1067
RGIG7010	China_rumen1332	China rumen	Bacteria	Verrucomicrobiota	Lentisphaeria	UBA1407	UBA1407	UBA1407
RGIG6998	China_rumen1320	China rumen	Bacteria	Bacteroidota	Bacteroidia	Bacteroidales	Bacteroidaceae	Prevotella
RGIG6999	China_rumen1321	China rumen	Bacteria	Firmicutes_A	Clostridia	Oscillospirales	Oscillospiraceae
RGIG7000	China_rumen1322	China rumen	Bacteria	Bacteroidota	Bacteroidia	Bacteroidales	Paludibacteraceae	UBA1754
RGIG7001	China_rumen1323	China rumen	Bacteria	Firmicutes_A	Clostridia	Oscillospirales	CAG-272	UMGS1696
RGIG7002	China_rumen1324	China rumen	Bacteria	Firmicutes_A	Clostridia	Lachnospirales	Lachnospiraceae
RGIG7003	China_rumen1325	China rumen	Bacteria	Cyanobacteria	Vampirovibrionia	Gastranaerophilales	Gastranaerophilaceae
RGIG7004	China_rumen1326	China rumen	Bacteria	Firmicutes_A	Clostridia	Lachnospirales	Lachnospiraceae	UBA1753
RGIG7005	China_rumen1327	China rumen	Bacteria	Firmicutes	Bacilli	RF39	CAG-1000	CAG-1000
RGIG7006	China_rumen1328	China rumen	Bacteria	Firmicutes_A	Clostridia	Lachnospirales	Lachnospiraceae	CAG-194
RGIG7007	China_rumen1329	China rumen	Bacteria	Firmicutes_A	Clostridia	Lachnospirales	Lachnospiraceae	UBA1267
RGIG7008	China_rumen1330	China rumen	Bacteria	Proteobacteria	Alphaproteobacteria	RF32	CAG-239	UBA1254
RGIG7009	China_rumen1331	China rumen	Bacteria	Firmicutes_A	Clostridia	Lachnospirales	Lachnospiraceae	AC2028
RGIG7011	China_rumen1333	China rumen	Bacteria	Bacteroidota	Bacteroidia	Bacteroidales	Bacteroidaceae	Alloprevotella	Alloprevotella sp900317635
RGIG7012	China_rumen1334	China rumen	Bacteria	Spirochaetota	Spirochaetia	Treponematales	Treponemataceae	Treponema_D
RGIG7013	China_rumen1335	China rumen	Bacteria	Firmicutes_C	Negativicutes	Selenomonadales	Selenomonadaceae	UBA9786
RGIG7014	China_rumen1336	China rumen	Bacteria	Bacteroidota	Bacteroidia	Bacteroidales	UBA1715	UBA1715
RGIG7015	China_rumen1337	China rumen	Bacteria	Firmicutes_A	Clostridia	Lachnospirales	Lachnospiraceae
RGIG7016	China_rumen1338	China rumen	Bacteria	Firmicutes_A	Clostridia	Lachnospirales	Lachnospiraceae	UBA1753
RGIG7019	China_rumen1341	China rumen	Bacteria	Bacteroidota	Bacteroidia	Bacteroidales	WCHB1-69
RGIG7017	China_rumen1339	China rumen	Bacteria	Bacteroidota	Bacteroidia	Bacteroidales	UBA932	RC9
RGIG7018	China_rumen1340	China rumen	Bacteria	Firmicutes_A	Clostridia	Lachnospirales	Lachnospiraceae	NK4A136	NK4A136 sp002373855
RGIG7020	China_rumen1342	China rumen	Bacteria	Bacteroidota	Bacteroidia	Bacteroidales	UBA932	RC9
RGIG7021	China_rumen1343	China rumen	Bacteria	Firmicutes_A	Clostridia	Oscillospirales	Ruminococcaceae	CAG-353
RGIG7022	China_rumen1344	China rumen	Bacteria	Firmicutes	Bacilli	RF39	CAG-1000	CAG-460
RGIG7023	China_rumen1345	China rumen	Bacteria	Fibrobacterota	Fibrobacteria	Fibrobacterales	Fibrobacteraceae	Fibrobacter
RGIG7024	China_rumen1346	China rumen	Bacteria	Firmicutes_A	Clostridia	Oscillospirales	Ruminococcaceae	Ruminococcus_D
RGIG7025	China_rumen1347	China rumen	Bacteria	Bacteroidota	Bacteroidia	Bacteroidales	WCHB1-69	F23-D06
RGIG7026	China_rumen1348	China rumen	Bacteria	Chloroflexota	Dehalococcoidia	Dehalococcoidales	Dehalococcoidaceae	UBA1222
RGIG7027	China_rumen1349	China rumen	Bacteria	Bacteroidota	Bacteroidia	Bacteroidales	P3	UBA1217
RGIG7028	China_rumen1350	China rumen	Bacteria	Spirochaetota	Spirochaetia	Sphaerochaetales	Sphaerochaetaceae	UBA9732
RGIG7031	China_rumen1353	China rumen	Bacteria	Bacteroidota	Bacteroidia	Bacteroidales	P3	UBA1711	UBA1711 sp900321975
RGIG7029	China_rumen1351	China rumen	Bacteria	Verrucomicrobiota	Lentisphaeria	UBA1407	UBA1407
RGIG7030	China_rumen1352	China rumen	Bacteria	Bacteroidota	Bacteroidia	Bacteroidales	UBA932	Bact-11
RGIG7032	China_rumen1354	China rumen	Bacteria	Firmicutes_A	Clostridia	Oscillospirales	Oscillospiraceae	Oscillibacter
RGIG7033	China_rumen1355	China rumen	Bacteria	Firmicutes_A	Clostridia_A	Christensenellales	CAG-74	SFHK01
RGIG7034	China_rumen1356	China rumen	Archaea	Thermoplasmatota	Thermoplasmata	Methanomassiliicoccales	Methanomethylophilaceae	ISO4-G1
RGIG7035	China_rumen1357	China rumen	Archaea	Thermoplasmatota	Thermoplasmata	Methanomassiliicoccales	Methanomethylophilaceae	ISO4-G1
RGIG7036	China_rumen1358	China rumen	Bacteria	Bacteroidota	Bacteroidia	Bacteroidales	UBA932	RC9	RC9 sp900167925
RGIG7037	China_rumen1359	China rumen	Bacteria	Bacteroidota	Bacteroidia	Bacteroidales	Bacteroidaceae	Ga6A1	Ga6A1 sp900102385
RGIG7038	China_rumen1360	China rumen	Bacteria	Firmicutes_A	Clostridia	Oscillospirales	Acutalibacteraceae	CAG-177
RGIG7039	China_rumen1361	China rumen	Bacteria	Bacteroidota	Bacteroidia	Bacteroidales	Bacteroidaceae	Alloprevotella
RGIG7041	China_rumen1363	China rumen	Bacteria	Firmicutes_A	Clostridia	Peptostreptococcales	Anaerovoracaceae	UBA1764
RGIG7040	China_rumen1362	China rumen	Bacteria	Proteobacteria	Alphaproteobacteria	RF32	CAG-239	RUG410
RGIG7042	China_rumen1364	China rumen	Bacteria	Bacteroidota	Bacteroidia	Bacteroidales	UBA3824	UBA3824
RGIG7043	China_rumen1365	China rumen	Bacteria	Firmicutes_A	Clostridia	Oscillospirales	Oscillospiraceae
RGIG7044	China_rumen1366	China rumen	Bacteria	Bacteroidota	Bacteroidia	Bacteroidales	UBA932	RC9
RGIG7045	China_rumen1367	China rumen	Bacteria	Firmicutes_A	Clostridia	Oscillospirales	Acutalibacteraceae	Eubacterium_R
RGIG7046	China_rumen1368	China rumen	Bacteria	Bacteroidota	Bacteroidia	Bacteroidales	Bacteroidaceae	UBA4372
RGIG7047	China_rumen1369	China rumen	Bacteria	Firmicutes_A	Clostridia	Lachnospirales	Lachnospiraceae	UBA3212
RGIG7048	China_rumen1370	China rumen	Bacteria	Bacteroidota	Bacteroidia	Bacteroidales	UBA3824	UBA3824
RGIG7049	China_rumen1371	China rumen	Bacteria	Bacteroidota	Bacteroidia	Bacteroidales	Paludibacteraceae	RF16
RGIG7050	China_rumen1372	China rumen	Bacteria	Fibrobacterota	Fibrobacteria	Fibrobacterales	Fibrobacteraceae	Fibrobacter
RGIG7051	China_rumen1373	China rumen	Bacteria	Firmicutes_A	Clostridia	Oscillospirales	Ruminococcaceae	Ruminococcus
RGIG7052	China_rumen1374	China rumen	Bacteria	Firmicutes_A	Clostridia	Oscillospirales	Acutalibacteraceae	CAG-177
RGIG7053	China_rumen1375	China rumen	Bacteria	Firmicutes_A	Clostridia	Oscillospirales	Oscillospiraceae	CAG-110
RGIG7055	China_rumen1377	China rumen	Bacteria	Firmicutes_A	Clostridia	Lachnospirales	Lachnospiraceae	AC2028
RGIG7054	China_rumen1376	China rumen	Bacteria	Firmicutes_A	Clostridia	Lachnospirales	Lachnospiraceae	UBA1066	UBA1066 sp900317515
RGIG7056	China_rumen1378	China rumen	Bacteria	Proteobacteria	Alphaproteobacteria	Rs-D84	Rs-D84	Rs-D84
RGIG7057	China_rumen1379	China rumen	Bacteria	Firmicutes_A	Clostridia	Lachnospirales	Lachnospiraceae
RGIG7072	China_rumen1394	China rumen	Bacteria	Bacteroidota	Bacteroidia	Bacteroidales	Bacteroidaceae	UBA1179
RGIG7058	China_rumen1380	China rumen	Bacteria	Firmicutes_A	Clostridia	Lachnospirales	Lachnospiraceae	UBA1201
RGIG7059	China_rumen1381	China rumen	Bacteria	Firmicutes_A	Clostridia	Lachnospirales	Lachnospiraceae
RGIG7060	China_rumen1382	China rumen	Bacteria	Firmicutes_A	Clostridia	Oscillospirales	Acutalibacteraceae	Eubacterium_R
RGIG7061	China_rumen1383	China rumen	Bacteria	Firmicutes_A	Clostridia	Oscillospirales	Ruminococcaceae	Ruminococcus
RGIG7062	China_rumen1384	China rumen	Bacteria	Planctomycetota	Planctomycetes	Pirellulales	Thermoguttaceae
RGIG7063	China_rumen1385	China rumen	Bacteria	Verrucomicrobiota	Verrucomicrobiae	Opitutales	CAG-312	UMGS1490
RGIG7064	China_rumen1386	China rumen	Bacteria	Firmicutes_A	Clostridia	Lachnospirales	Lachnospiraceae	XBB2008
RGIG7065	China_rumen1387	China rumen	Bacteria	Firmicutes_A	Clostridia	Lachnospirales	CAG-274
RGIG7066	China_rumen1388	China rumen	Bacteria	Firmicutes_A	Clostridia	Lachnospirales	Lachnospiraceae	UBA1267
RGIG7067	China_rumen1389	China rumen	Bacteria	Firmicutes_A	Clostridia	Oscillospirales	Acutalibacteraceae
RGIG7068	China_rumen1390	China rumen	Bacteria	Verrucomicrobiota	Lentisphaeria	UBA1407	UBA1407
RGIG7069	China_rumen1391	China rumen	Bacteria	Firmicutes_A	Clostridia	Oscillospirales	Oscillospiraceae	CAG-110
RGIG7071	China_rumen1393	China rumen	Bacteria	Proteobacteria	Alphaproteobacteria	RF32	CAG-239	UBA1254
RGIG7070	China_rumen1392	China rumen	Bacteria	Bacteroidota	Bacteroidia	Bacteroidales	UBA932	RC9
RGIG7073	China_rumen1395	China rumen	Bacteria	Firmicutes_A	Clostridia	Oscillospirales	Oscillospiraceae	UBA1777
RGIG7074	China_rumen1396	China rumen	Bacteria	Bacteroidota	Bacteroidia	Bacteroidales	Paludibacteraceae	RF16
RGIG7076	China_rumen1398	China rumen	Bacteria	Firmicutes_A	Clostridia	Oscillospirales	CAG-272
RGIG7078	China_rumen1400	China rumen	Bacteria	Spirochaetota	Spirochaetia	Treponematales	Treponemataceae	Treponema_D	Treponema_D sp003447785
RGIG7077	China_rumen1399	China rumen	Bacteria	Firmicutes_A	Clostridia	Oscillospirales	Oscillospiraceae
RGIG7079	China_rumen1401	China rumen	Bacteria	Firmicutes_A	Clostridia_A	Christensenellales	CAG-74
RGIG7080	China_rumen1402	China rumen	Bacteria	Firmicutes	Bacilli	Erysipelotrichales	Erysipelotrichaceae	Bulleidia
RGIG7081	China_rumen1403	China rumen	Bacteria	Bacteroidota	Bacteroidia	Bacteroidales	WCHB1-69	UBA1205
RGIG7082	China_rumen1404	China rumen	Bacteria	Firmicutes_A	Clostridia	Oscillospirales	CAG-382	UBA1752
RGIG7083	China_rumen1405	China rumen	Bacteria	Firmicutes_A	Clostridia	Oscillospirales	CAG-272	CAG-448
RGIG7084	China_rumen1406	China rumen	Bacteria	Bacteroidota	Bacteroidia	Bacteroidales	P3	UBA1217
RGIG7085	China_rumen1407	China rumen	Bacteria	Firmicutes	Bacilli	Erysipelotrichales	Erysipelotrichaceae	Bulleidia
RGIG7086	China_rumen1408	China rumen	Bacteria	UBA3054	UBA3054	UBA3054	UBA3054	UBA3054
RGIG7087	China_rumen1409	China rumen	Bacteria	Firmicutes_A	Clostridia	Oscillospirales	Acutalibacteraceae	CAG-177
RGIG7088	China_rumen1410	China rumen	Bacteria	Spirochaetota	Spirochaetia	Treponematales	Treponemataceae	Treponema_D	Treponema_D sp002369025
RGIG7089	China_rumen1411	China rumen	Bacteria	Proteobacteria	Alphaproteobacteria	RF32	UBA3637
RGIG7090	China_rumen1412	China rumen	Bacteria	Firmicutes_A	Clostridia	Oscillospirales	Ruminococcaceae	Firm-04
RGIG7091	China_rumen1413	China rumen	Bacteria	Firmicutes_A	Clostridia_A	Christensenellales	CAG-138	UBA3857
RGIG6588	China_rumen910	China rumen	#N/A	Others	Others	Others	Others	Others	Others
RGIG6589	China_rumen911	China rumen	Archaea	Thermoplasmatota	Thermoplasmata	Methanomassiliicoccales	Methanomethylophilaceae	ISO4-G1
RGIG6590	China_rumen912	China rumen	Bacteria	Elusimicrobiota	Endomicrobia	Endomicrobiales	Endomicrobiaceae	RUG658
RGIG6591	China_rumen913	China rumen	Bacteria	Firmicutes_C	Negativicutes	Selenomonadales	Selenomonadaceae	UBA7018
RGIG6592	China_rumen914	China rumen	Bacteria	Bacteroidota	Bacteroidia	Bacteroidales	Bacteroidaceae	UBA4334
RGIG6593	China_rumen915	China rumen	Bacteria	Firmicutes_A	Clostridia	Lachnospirales	Lachnospiraceae	UBA3766
RGIG6594	China_rumen916	China rumen	Bacteria	Firmicutes	Bacilli	Acholeplasmatales	Anaeroplasmataceae
RGIG6595	China_rumen917	China rumen	Bacteria	Firmicutes_A	Clostridia	Lachnospirales	Lachnospiraceae	UBA1712-A
RGIG6596	China_rumen918	China rumen	Bacteria	Bacteroidota	Bacteroidia	Bacteroidales	Bacteroidaceae	UBA2918
RGIG6597	China_rumen919	China rumen	Bacteria	Elusimicrobiota	Elusimicrobia	Elusimicrobiales	Elusimicrobiaceae
RGIG6598	China_rumen920	China rumen	Bacteria	Firmicutes_A	Clostridia	Oscillospirales	CAG-272	UMGS1696
RGIG6599	China_rumen921	China rumen	Bacteria	Bacteroidota	Bacteroidia	Bacteroidales	Bacteroidaceae	UBA6382
RGIG6600	China_rumen922	China rumen	Bacteria	Verrucomicrobiota	Lentisphaeria	UBA1407	UBA1407	UBA1407
RGIG6601	China_rumen923	China rumen	Bacteria	Firmicutes_A	Clostridia	Oscillospirales	Oscillospiraceae	Oscillibacter
RGIG6602	China_rumen924	China rumen	Bacteria	Firmicutes_A	Clostridia	Lachnospirales	Lachnospiraceae
RGIG6603	China_rumen925	China rumen	Bacteria	Firmicutes_A	Clostridia	Oscillospirales	Ruminococcaceae	UBA3855
RGIG6604	China_rumen926	China rumen	Bacteria	Firmicutes_A	Clostridia	Oscillospirales	Acutalibacteraceae	CAG-177
RGIG6605	China_rumen927	China rumen	Bacteria	Firmicutes_A	Clostridia	Lachnospirales	Lachnospiraceae
RGIG6606	China_rumen928	China rumen	Bacteria	Bacteroidota	Bacteroidia	Bacteroidales	Bacteroidaceae	Prevotella	Prevotella sp900318395
RGIG6607	China_rumen929	China rumen	Bacteria	Bacteroidota	Bacteroidia	Bacteroidales	Paludibacteraceae	RF16
RGIG6608	China_rumen930	China rumen	Bacteria	Bacteroidota	Bacteroidia	Bacteroidales	UBA932	RC9
RGIG6609	China_rumen931	China rumen	Bacteria	Bacteroidota	Bacteroidia	Bacteroidales	Bacteroidaceae	UBA1179
RGIG6610	China_rumen932	China rumen	Bacteria	Elusimicrobiota	Endomicrobia	Endomicrobiales	Endomicrobiaceae	RUG658
RGIG6611	China_rumen933	China rumen	Bacteria	Firmicutes	Bacilli	RF39	CAG-611	RUG591
RGIG6612	China_rumen934	China rumen	Bacteria	Desulfobacterota	Desulfovibrionia	Desulfovibrionales	Desulfovibrionaceae	Desulfovibrio
RGIG6613	China_rumen935	China rumen	Bacteria	Firmicutes_A	Clostridia	TANB77	CAG-508	CAG-492
RGIG6614	China_rumen936	China rumen	Bacteria	Firmicutes_A	Clostridia	Oscillospirales	Ruminococcaceae	Ruminococcus
RGIG6615	China_rumen937	China rumen	Bacteria	Proteobacteria	Alphaproteobacteria	RF32	CAG-239	RUG410
RGIG6616	China_rumen938	China rumen	Bacteria	Spirochaetota	Spirochaetia
RGIG6617	China_rumen939	China rumen	Bacteria	Firmicutes	Bacilli	RFN20	CAG-826	UBA4951
RGIG6618	China_rumen940	China rumen	Bacteria	Fibrobacterota	Fibrobacteria	Fibrobacterales	Fibrobacteraceae	Fibrobacter
RGIG6619	China_rumen941	China rumen	Bacteria	Proteobacteria	Alphaproteobacteria	RF32	CAG-239	RUG410
RGIG6620	China_rumen942	China rumen	Bacteria	Firmicutes_A	Clostridia	Oscillospirales	Acutalibacteraceae	UBA6857
RGIG6621	China_rumen943	China rumen	Bacteria	Proteobacteria	Alphaproteobacteria	Rs-D84	Rs-D84	Rs-D84
RGIG6622	China_rumen944	China rumen	Bacteria	Firmicutes_A	Clostridia	TANB77	CAG-508
RGIG6623	China_rumen945	China rumen	Bacteria	Bacteroidota	Bacteroidia	Bacteroidales	Bacteroidaceae	Prevotella
RGIG6624	China_rumen946	China rumen	Bacteria	Firmicutes_A	Clostridia	Oscillospirales	Oscillospiraceae	UBA738
RGIG6625	China_rumen947	China rumen	Bacteria	Bacteroidota	Bacteroidia	Bacteroidales	Paludibacteraceae	UBA1181
RGIG6626	China_rumen948	China rumen	Bacteria	Bacteroidota	Bacteroidia	Bacteroidales	WCHB1-69	F23-D06
RGIG6627	China_rumen949	China rumen	Bacteria	Firmicutes_A	Clostridia	Lachnospirales	Lachnospiraceae	Eubacterium_Q
RGIG6628	China_rumen950	China rumen	Bacteria	Firmicutes_A	Clostridia	Saccharofermentanales	Saccharofermentanaceae	Saccharofermentans
RGIG6629	China_rumen951	China rumen	Bacteria	Firmicutes_A	Clostridia	Oscillospirales	Oscillospiraceae
RGIG6630	China_rumen952	China rumen	Bacteria	Spirochaetota	Spirochaetia	Treponematales	Treponemataceae	Treponema_D	Treponema_D sp900316905
RGIG6631	China_rumen953	China rumen	Bacteria	Bacteroidota	Bacteroidia	Bacteroidales	Bacteroidaceae	UBA3839
RGIG6632	China_rumen954	China rumen	Bacteria	Bacteroidota	Bacteroidia	Bacteroidales	P3
RGIG6633	China_rumen955	China rumen	Bacteria	Firmicutes_A	Clostridia	Oscillospirales	Ruminococcaceae	HUN007
RGIG6634	China_rumen956	China rumen	Bacteria	Bacteroidota	Bacteroidia	Bacteroidales	Bacteroidaceae	UBA4372
RGIG6635	China_rumen957	China rumen	Bacteria	Firmicutes	Bacilli	RF39	CAG-822	UBA5578
RGIG6636	China_rumen958	China rumen	Bacteria	Bacteroidota	Bacteroidia	Bacteroidales	UBA932
RGIG6637	China_rumen959	China rumen	Bacteria	Firmicutes_A	Clostridia	Oscillospirales	Oscillospiraceae	UBA1774
RGIG6638	China_rumen960	China rumen	Bacteria	Spirochaetota	Spirochaetia	Treponematales	Treponemataceae	Treponema_D	Treponema_D sp002448445
RGIG6639	China_rumen961	China rumen	Bacteria	Bacteroidota	Bacteroidia	Bacteroidales	Paludibacteraceae
RGIG6640	China_rumen962	China rumen	Bacteria	Firmicutes_A	Clostridia_A	Christensenellales	Christensenellaceae	QANA01
RGIG6641	China_rumen963	China rumen	Bacteria	Bacteroidota	Bacteroidia	Bacteroidales	UBA932	RC9
RGIG6642	China_rumen964	China rumen	Bacteria	Bacteroidota	Bacteroidia	Bacteroidales	Salinivirgaceae
RGIG6643	China_rumen965	China rumen	Bacteria	Firmicutes_A	Clostridia	Lachnospirales	Lachnospiraceae
RGIG6644	China_rumen966	China rumen	Bacteria	Firmicutes_A	Clostridia	Oscillospirales	Oscillospiraceae	Oscillibacter
RGIG6645	China_rumen967	China rumen	Bacteria	Firmicutes_A	Clostridia	Lachnospirales	Lachnospiraceae	AC2028
RGIG6646	China_rumen968	China rumen	Bacteria	Bacteroidota	Bacteroidia	Bacteroidales	WCHB1-69	UBA1756
RGIG6647	China_rumen969	China rumen	Bacteria	Bacteroidota	Bacteroidia	Bacteroidales	WCHB1-69	F23-D06	F23-D06 sp002392325
RGIG6648	China_rumen970	China rumen	Bacteria	Firmicutes_A	Clostridia	Oscillospirales	Oscillospiraceae	UBA1777
RGIG6649	China_rumen971	China rumen	Bacteria	Verrucomicrobiota	Kiritimatiellae	LD1-PB3	Lenti-01
RGIG6650	China_rumen972	China rumen	Bacteria	Verrucomicrobiota	Lentisphaeria	Victivallales	UBA1829	UBA1732
RGIG6651	China_rumen973	China rumen	Bacteria	Firmicutes_A	Clostridia	Lachnospirales	Lachnospiraceae	Acetatifactor
RGIG6652	China_rumen974	China rumen	Bacteria	Bacteroidota	Bacteroidia	Bacteroidales	UBA932	RC9	RC9 sp900319375
RGIG6653	China_rumen975	China rumen	Bacteria	Firmicutes_C	Negativicutes	Selenomonadales	Selenomonadaceae	UBA7018
RGIG6654	China_rumen976	China rumen	Bacteria	Proteobacteria	Alphaproteobacteria	RF32	CAG-239	RUG410
RGIG6655	China_rumen977	China rumen	Bacteria	Firmicutes_A	Clostridia_A	Christensenellales	CAG-74	Firm-10
RGIG6656	China_rumen978	China rumen	Bacteria	Bacteroidota	Bacteroidia	Bacteroidales	UBA3663	UBA3663	UBA3663 sp900319235
RGIG6657	China_rumen979	China rumen	Bacteria	Bacteroidota	Bacteroidia	Bacteroidales	WCHB1-69	F23-D06
RGIG6658	China_rumen980	China rumen	Bacteria	Firmicutes_A	Clostridia	Lachnospirales	Lachnospiraceae	NK4A136
RGIG6659	China_rumen981	China rumen	Bacteria	Firmicutes_A	Clostridia	Lachnospirales	Lachnospiraceae	NK4A136
RGIG6660	China_rumen982	China rumen	Bacteria	Bacteroidota	Bacteroidia	Bacteroidales	Bacteroidaceae	UBA4372
RGIG6661	China_rumen983	China rumen	Bacteria	Firmicutes_A	Clostridia	Oscillospirales	Oscillospiraceae	UBA1777
RGIG6662	China_rumen984	China rumen	Bacteria	Firmicutes_A	Clostridia	Oscillospirales	Oscillospiraceae	Oscillibacter
RGIG6663	China_rumen985	China rumen	Bacteria	Firmicutes_A	Clostridia	Saccharofermentanales	Saccharofermentanaceae	Saccharofermentans
RGIG6664	China_rumen986	China rumen	Bacteria	Firmicutes_A	Clostridia	Lachnospirales	Lachnospiraceae	UBA2868
RGIG6665	China_rumen987	China rumen	Bacteria	Bacteroidota	Bacteroidia	Bacteroidales	Bacteroidaceae	Prevotella	Prevotella sp900320445
RGIG6666	China_rumen988	China rumen	#N/A	Others	Others	Others	Others	Others	Others
RGIG6667	China_rumen989	China rumen	Bacteria	Riflebacteria	Ozemobacteria	Ozemobacterales	Ozemobacteraceae	RUG334
RGIG6668	China_rumen990	China rumen	Bacteria	Bacteroidota	Bacteroidia	Bacteroidales	Bacteroidaceae	RUG210	RUG210 sp900316575
RGIG6669	China_rumen991	China rumen	Bacteria	Fibrobacterota	Fibrobacteria	Fibrobacterales	Fibrobacteraceae	Fibrobacter
RGIG6670	China_rumen992	China rumen	Bacteria	Firmicutes_A	Clostridia	Oscillospirales	Oscillospiraceae	UBA738
RGIG6671	China_rumen993	China rumen	Bacteria	Bacteroidota	Bacteroidia	Bacteroidales	F082	F082
RGIG6672	China_rumen994	China rumen	Bacteria	Bacteroidota	Bacteroidia	Bacteroidales	UBA932	RC9	RC9 sp900321245
RGIG6673	China_rumen995	China rumen	Bacteria	Firmicutes_A	Clostridia_A	Christensenellales	CAG-74	GCA-900199385
RGIG6674	China_rumen996	China rumen	Bacteria	Bacteroidota	Bacteroidia	Bacteroidales	Paludibacteraceae	RF16
RGIG6675	China_rumen997	China rumen	Bacteria	Firmicutes_A	Clostridia	Oscillospirales	Ruminococcaceae	Ruminococcus_D
RGIG6676	China_rumen998	China rumen	Bacteria	Bacteroidota	Bacteroidia	Bacteroidales	Bacteroidaceae	Prevotella
RGIG6677	China_rumen999	China rumen	Bacteria	Bacteroidota	Bacteroidia	Bacteroidales	UBA932	RC9
RGIG6678	China_rumen1000	China rumen	Bacteria	Firmicutes_A	Clostridia	Lachnospirales	Lachnospiraceae	UBA1201_A
RGIG6679	China_rumen1001	China rumen	Bacteria	Bacteroidota	Bacteroidia	Bacteroidales	UBA932	RC9	RC9 sp900321715
RGIG6680	China_rumen1002	China rumen	Bacteria	Firmicutes_A	Clostridia	Lachnospirales	Lachnospiraceae	UBA3766
RGIG6681	China_rumen1003	China rumen	Bacteria	Bacteroidota	Bacteroidia	Bacteroidales	Bacteroidaceae	UBA1179
RGIG6682	China_rumen1004	China rumen	Bacteria	Bacteroidota	Bacteroidia	Bacteroidales	ML635J-15	Bact-19
RGIG6683	China_rumen1005	China rumen	Bacteria	Elusimicrobiota	Elusimicrobia	Elusimicrobiales	Elusimicrobiaceae	UBA1436
RGIG6684	China_rumen1006	China rumen	Bacteria	Bacteroidota	Bacteroidia	Bacteroidales	Bacteroidaceae	UBA1786
RGIG6685	China_rumen1007	China rumen	Bacteria	Bacteroidota	Bacteroidia	Bacteroidales	Bacteroidaceae	Prevotella	Prevotella sp900315095
RGIG6686	China_rumen1008	China rumen	Bacteria	Firmicutes	Bacilli	Erysipelotrichales	Erysipelotrichaceae	UBA636	UBA636 sp900321955
RGIG6687	China_rumen1009	China rumen	Bacteria	Spirochaetota	Spirochaetia	Treponematales	Treponemataceae	Treponema_D
RGIG6688	China_rumen1010	China rumen	Bacteria	Verrucomicrobiota	Kiritimatiellae	RFP12
RGIG6689	China_rumen1011	China rumen	Bacteria	Firmicutes_A	Clostridia	Lachnospirales	Lachnospiraceae	Acetatifactor
RGIG6690	China_rumen1012	China rumen	Bacteria	Verrucomicrobiota	Verrucomicrobiae	Opitutales	CAG-312	UMGS1490
RGIG6691	China_rumen1013	China rumen	Bacteria	Verrucomicrobiota	Kiritimatiellae	RFP12	UBA1067	UBA1067
RGIG6692	China_rumen1014	China rumen	Bacteria	Firmicutes_A	Clostridia	Oscillospirales	Ruminococcaceae	Ruminococcus_D
RGIG6693	China_rumen1015	China rumen	Bacteria	Firmicutes_A	Clostridia_A	Christensenellales	Christensenellaceae	QANA01
RGIG6694	China_rumen1016	China rumen	Bacteria	Bacteroidota	Bacteroidia	Bacteroidales	Salinivirgaceae
RGIG6695	China_rumen1017	China rumen	Bacteria	Firmicutes_A	Clostridia	Oscillospirales	Ruminococcaceae	Ruminococcus
RGIG6696	China_rumen1018	China rumen	Bacteria	Elusimicrobiota	Endomicrobia	Endomicrobiales	Endomicrobiaceae	RUG658
RGIG6697	China_rumen1019	China rumen	Bacteria	Firmicutes	Bacilli	RF39	CAG-611	CAG-417
RGIG6698	China_rumen1020	China rumen	Bacteria	Patescibacteria	Gracilibacteria	Absconditabacterales	X112	UBA3291
RGIG6699	China_rumen1021	China rumen	Bacteria	Firmicutes_A	Clostridia_A	Christensenellales	CAG-138	PeH17
RGIG6700	China_rumen1022	China rumen	Bacteria	Firmicutes_A	Clostridia_A	Christensenellales	CAG-74	RUG563
RGIG6701	China_rumen1023	China rumen	Bacteria	Firmicutes_A	Clostridia	Lachnospirales	Lachnospiraceae	NK4A136
RGIG6702	China_rumen1024	China rumen	Bacteria	Firmicutes_A	Clostridia	Lachnospirales	Lachnospiraceae	SZUA-448
RGIG6703	China_rumen1025	China rumen	Bacteria	Verrucomicrobiota	Kiritimatiellae	RFP12	UBA1067
RGIG6704	China_rumen1026	China rumen	Bacteria	Proteobacteria	Alphaproteobacteria	Rs-D84	Rs-D84	Rs-D84
RGIG6705	China_rumen1027	China rumen	Bacteria	Spirochaetota	Spirochaetia	Treponematales	Treponemataceae	Treponema_D
RGIG6706	China_rumen1028	China rumen	Bacteria	Bacteroidota	Bacteroidia	Bacteroidales	Bacteroidaceae	Prevotella
RGIG6707	China_rumen1029	China rumen	Bacteria	Bacteroidota	Bacteroidia	Bacteroidales	WCHB1-69	UBA1195
RGIG6709	China_rumen1031	China rumen	Bacteria	Firmicutes_A	Clostridia	Lachnospirales	Lachnospiraceae	CAG-127
RGIG6710	China_rumen1032	China rumen	Bacteria	Bacteroidota	Bacteroidia	Bacteroidales	WCHB1-69
RGIG6711	China_rumen1033	China rumen	Bacteria	Bacteroidota	Bacteroidia	Bacteroidales	Paludibacteraceae	RF16
RGIG6712	China_rumen1034	China rumen	Bacteria	Verrucomicrobiota	Kiritimatiellae	RFP12	UBA1067	UBA1067
RGIG6713	China_rumen1035	China rumen	Bacteria	Verrucomicrobiota	Lentisphaeria	UBA1407	UBA1407
RGIG6714	China_rumen1036	China rumen	Bacteria	Bacteroidota	Bacteroidia	Bacteroidales	Paludibacteraceae	RF16
RGIG6715	China_rumen1037	China rumen	Bacteria	Bacteroidota	Bacteroidia	Bacteroidales	Bacteroidaceae	UBA6382
RGIG6716	China_rumen1038	China rumen	Bacteria	Firmicutes_A	Clostridia	Oscillospirales	Oscillospiraceae	CAG-110
RGIG6717	China_rumen1039	China rumen	Bacteria	Firmicutes_C	Negativicutes	Acidaminococcales	Acidaminococcaceae	Succiniclasticum	Succiniclasticum sp900315925
RGIG6718	China_rumen1040	China rumen	Bacteria	UBP6	UBA1177	UBA1177	UBA1177	UBA1177
RGIG6719	China_rumen1041	China rumen	Bacteria	Bacteroidota	Bacteroidia	Bacteroidales	Bacteroidaceae	UBA4372
RGIG6720	China_rumen1042	China rumen	Bacteria	Verrucomicrobiota	Kiritimatiellae	RFP12	UBA1067	UBA1731
RGIG6721	China_rumen1043	China rumen	Bacteria	Bacteroidota	Bacteroidia	Bacteroidales	Bacteroidaceae	UBA4372
RGIG6722	China_rumen1044	China rumen	Bacteria	Firmicutes_C	Negativicutes	Selenomonadales	Selenomonadaceae	UBA7018
RGIG6723	China_rumen1045	China rumen	Bacteria	Bacteroidota	Bacteroidia	Bacteroidales	WCHB1-69	F23-D06
RGIG6724	China_rumen1046	China rumen	Bacteria	Firmicutes_A	Clostridia	Lachnospirales	Lachnospiraceae	Butyrivibrio
RGIG6725	China_rumen1047	China rumen	Bacteria	Bacteroidota	Bacteroidia	Bacteroidales	UBA932	Bact-11
RGIG6726	China_rumen1048	China rumen	Bacteria	Firmicutes	Bacilli	RF39	CAG-611	CAG-710
RGIG6727	China_rumen1049	China rumen	Bacteria	Firmicutes_A	Clostridia	Lachnospirales	Lachnospiraceae	Butyrivibrio	Butyrivibrio hungatei_B
RGIG6728	China_rumen1050	China rumen	Bacteria	Firmicutes_A	Clostridia	Lachnospirales	Lachnospiraceae
RGIG6729	China_rumen1051	China rumen	Bacteria	Bacteroidota	Bacteroidia	Bacteroidales	WCHB1-69	F23-D06	F23-D06 sp900319925
RGIG6730	China_rumen1052	China rumen	Bacteria	Bacteroidota	Bacteroidia	Bacteroidales	Bacteroidaceae	Prevotella
RGIG6731	China_rumen1053	China rumen	Bacteria	Firmicutes_A	Clostridia	Oscillospirales	Oscillospiraceae	UBA1777
RGIG6732	China_rumen1054	China rumen	Bacteria	Firmicutes_A	Clostridia	Lachnospirales	Lachnospiraceae	Butyrivibrio
RGIG6733	China_rumen1055	China rumen	Bacteria	Bacteroidota	Bacteroidia	Bacteroidales	Bacteroidaceae	UBA4372
RGIG6734	China_rumen1056	China rumen	Bacteria	Bacteroidota	Bacteroidia	Bacteroidales	Bacteroidaceae	Prevotella
RGIG6735	China_rumen1057	China rumen	Bacteria	Verrucomicrobiota	Kiritimatiellae	RFP12	UBA1067	UBA1067
RGIG6736	China_rumen1058	China rumen	Bacteria	Bacteroidota	Bacteroidia	Bacteroidales	UBA932	RC9	RC9 sp900321245
RGIG6737	China_rumen1059	China rumen	Bacteria	Bacteroidota	Bacteroidia	Bacteroidales	WCHB1-69	UBA1756
RGIG6738	China_rumen1060	China rumen	Bacteria	Bacteroidota	Bacteroidia	Bacteroidales	UBA1715	UBA1715	UBA1715 sp002371705
RGIG6739	China_rumen1061	China rumen	Bacteria	Firmicutes_A	Clostridia	Oscillospirales	Oscillospiraceae	UBA1774
RGIG6740	China_rumen1062	China rumen	Bacteria	Firmicutes_A	Clostridia	Oscillospirales	CAG-272	UMGS1696
RGIG6741	China_rumen1063	China rumen	Bacteria	Verrucomicrobiota	Lentisphaeria	Victivallales	UBA1829	UBA11452
RGIG6742	China_rumen1064	China rumen	Bacteria	Firmicutes_C	Negativicutes	Selenomonadales	Selenomonadaceae	UBA3796
RGIG6743	China_rumen1065	China rumen	Bacteria	Spirochaetota	Spirochaetia
RGIG6745	China_rumen1067	China rumen	Bacteria	Firmicutes	Bacilli	Erysipelotrichales	Erysipelotrichaceae	UBA636
RGIG6746	China_rumen1068	China rumen	Bacteria	Bacteroidota	Bacteroidia	Bacteroidales	WCHB1-69	UBA1195
RGIG6747	China_rumen1069	China rumen	Bacteria	Bacteroidota	Bacteroidia	Bacteroidales	UBA3824	UBA3824
RGIG6748	China_rumen1070	China rumen	Bacteria	Verrucomicrobiota	Lentisphaeria	UBA1407	UBA1407
RGIG6749	China_rumen1071	China rumen	Bacteria	Bacteroidota	Bacteroidia	Bacteroidales	UBA932	RC9
RGIG6750	China_rumen1072	China rumen	Bacteria	Bacteroidota	Bacteroidia	Bacteroidales	Paludibacteraceae	RF16
RGIG6751	China_rumen1073	China rumen	Bacteria	Fibrobacterota	Fibrobacteria	Fibrobacterales	Fibrobacteraceae	Fibrobacter	Fibrobacter sp002210295
RGIG6752	China_rumen1074	China rumen	Archaea	Thermoplasmatota	Thermoplasmata	Methanomassiliicoccales	Methanomethylophilaceae	ISO4-G1
RGIG6753	China_rumen1075	China rumen	Bacteria	Proteobacteria	Alphaproteobacteria	Rs-D84	Rs-D84	Rs-D84
RGIG6754	China_rumen1076	China rumen	Bacteria	Elusimicrobiota	Elusimicrobia	Elusimicrobiales	Elusimicrobiaceae	UBA1436
RGIG6755	China_rumen1077	China rumen	Bacteria	Firmicutes	Bacilli	RF39	CAG-1000	UBA11963
RGIG6756	China_rumen1078	China rumen	Bacteria	Bacteroidota	Bacteroidia	Bacteroidales	UBA1715	UBA1715	UBA1715 sp002371705
RGIG6757	China_rumen1079	China rumen	Bacteria	Verrucomicrobiota	Lentisphaeria	Victivallales	UBA1829	UBA1732
RGIG6758	China_rumen1080	China rumen	Bacteria	Firmicutes_A	Clostridia_A	Christensenellales	CAG-74
RGIG6759	China_rumen1081	China rumen	Bacteria	Bacteroidota	Bacteroidia	Bacteroidales	Paludibacteraceae	RF16
RGIG6760	China_rumen1082	China rumen	Bacteria	Firmicutes	Bacilli	Acholeplasmatales	Anaeroplasmataceae
RGIG6761	China_rumen1083	China rumen	Bacteria	UBP6	UBA1177	UBA1177	UBA1177	UBA1177
RGIG6762	China_rumen1084	China rumen	Bacteria	Firmicutes_A	Clostridia	Saccharofermentanales	Saccharofermentanaceae	Saccharofermentans
RGIG6763	China_rumen1085	China rumen	Bacteria	Bacteroidota	Bacteroidia	Bacteroidales	UBA932	RC9
RGIG6764	China_rumen1086	China rumen	Bacteria	Bacteroidota	Bacteroidia	Bacteroidales	Bacteroidaceae	Prevotella
RGIG6765	China_rumen1087	China rumen	Bacteria	Firmicutes_A	Clostridia	Oscillospirales	Oscillospiraceae	UBA1774
RGIG6766	China_rumen1088	China rumen	Archaea	Thermoplasmatota	Thermoplasmata	Methanomassiliicoccales	Methanomethylophilaceae	ISO4-G1
RGIG6767	China_rumen1089	China rumen	Bacteria	Firmicutes_A	Clostridia	Oscillospirales	Oscillospiraceae	CAG-110
RGIG6768	China_rumen1090	China rumen	Archaea	Thermoplasmatota	Thermoplasmata	Methanomassiliicoccales	Methanomethylophilaceae
RGIG6769	China_rumen1091	China rumen	Bacteria	Bacteroidota	Bacteroidia	Bacteroidales	P3	UBA1711
RGIG6770	China_rumen1092	China rumen	Bacteria	Firmicutes_A	Clostridia_A	Christensenellales	CAG-74	RUG756
RGIG6771	China_rumen1093	China rumen	Bacteria	Elusimicrobiota	Elusimicrobia	Elusimicrobiales	Elusimicrobiaceae	UBA1174
RGIG6772	China_rumen1094	China rumen	Bacteria	Proteobacteria	Alphaproteobacteria	Rs-D84	Rs-D84	Rs-D84
RGIG6773	China_rumen1095	China rumen	Bacteria	Firmicutes_A	Clostridia	Oscillospirales	Ruminococcaceae	Ruminococcus	Ruminococcus flavefaciens_N
RGIG6774	China_rumen1096	China rumen	Bacteria	Firmicutes_A	Clostridia_A	Christensenellales	CAG-138	UBA3857
RGIG6775	China_rumen1097	China rumen	Bacteria	Bacteroidota	Bacteroidia	Bacteroidales	Paludibacteraceae	UBA1181
RGIG6776	China_rumen1098	China rumen	Bacteria	Firmicutes_A	Clostridia	TANB77	CAG-508	UMGS1754
RGIG6777	China_rumen1099	China rumen	Bacteria	Firmicutes_A	Clostridia	Lachnospirales	Lachnospiraceae	Pseudobutyrivibrio
RGIG6778	China_rumen1100	China rumen	Bacteria	Bacteroidota	Bacteroidia	Bacteroidales	Bacteroidaceae	UBA4372
RGIG6779	China_rumen1101	China rumen	Bacteria	Firmicutes_A	Clostridia	Lachnospirales	Lachnospiraceae	UBA2868
RGIG6780	China_rumen1102	China rumen	Bacteria	Firmicutes_A	Clostridia_A	Christensenellales	CAG-74	RUG563
RGIG6781	China_rumen1103	China rumen	Bacteria	Bacteroidota	Bacteroidia	Bacteroidales	Bacteroidaceae	Prevotella
RGIG6782	China_rumen1104	China rumen	Bacteria	Bacteroidota	Bacteroidia	Bacteroidales	P3	UBA1217
RGIG6783	China_rumen1105	China rumen	Bacteria	Proteobacteria	Alphaproteobacteria	Rs-D84	Rs-D84	Rs-D84
RGIG6784	China_rumen1106	China rumen	Bacteria	Bacteroidota	Bacteroidia	Bacteroidales	Bacteroidaceae	UBA4372
RGIG6785	China_rumen1107	China rumen	Bacteria	Bacteroidota	Bacteroidia	Bacteroidales	Paludibacteraceae	UBA4345	UBA4345 sp002362105
RGIG6786	China_rumen1108	China rumen	Bacteria	Firmicutes_A	Clostridia_A	Christensenellales	CAG-138	UBA3792
RGIG6787	China_rumen1109	China rumen	Bacteria	Bacteroidota	Bacteroidia	Bacteroidales	Paludibacteraceae	RF16
RGIG6788	China_rumen1110	China rumen	Bacteria	Firmicutes_A	Clostridia_A	Christensenellales	CAG-74
RGIG6789	China_rumen1111	China rumen	Bacteria	Bacteroidota	Bacteroidia	Bacteroidales	Bacteroidaceae	UBA4334
RGIG6790	China_rumen1112	China rumen	Bacteria	Firmicutes_A	Clostridia	Oscillospirales	Ruminococcaceae	Ruminococcus
RGIG6791	China_rumen1113	China rumen	Bacteria	Bacteroidota	Bacteroidia	Bacteroidales	Bacteroidaceae	43-108
RGIG6792	China_rumen1114	China rumen	Bacteria	Bacteroidota	Bacteroidia	Bacteroidales	Bacteroidaceae	UBA4372
RGIG6793	China_rumen1115	China rumen	Bacteria	Bacteroidota	Bacteroidia	Bacteroidales	ML635J-15	Bact-19
RGIG6794	China_rumen1116	China rumen	Bacteria	Bacteroidota	Bacteroidia	Bacteroidales	UBA932	RC9
RGIG6795	China_rumen1117	China rumen	Bacteria	Firmicutes_A	Clostridia	Oscillospirales	Ruminococcaceae	Ruminococcus_D
RGIG6796	China_rumen1118	China rumen	Bacteria	Bacteroidota	Bacteroidia	Bacteroidales	Bacteroidaceae	UBA2918
RGIG6797	China_rumen1119	China rumen	Bacteria	Spirochaetota	Spirochaetia	Treponematales	Treponemataceae	Treponema_D
RGIG6798	China_rumen1120	China rumen	Bacteria	Firmicutes	Bacilli	RFN20	CAG-826	UBA3207
RGIG6799	China_rumen1121	China rumen	Bacteria	Spirochaetota	Spirochaetia	Treponematales	Treponemataceae	Treponema_D
RGIG6800	China_rumen1122	China rumen	Bacteria	Bacteroidota	Bacteroidia	Bacteroidales	Bacteroidaceae	Prevotella
RGIG6801	China_rumen1123	China rumen	Archaea	Thermoplasmatota	Thermoplasmata	Methanomassiliicoccales	Methanomethylophilaceae
RGIG6802	China_rumen1124	China rumen	Bacteria	Bacteroidota	Bacteroidia	Bacteroidales	WCHB1-69
RGIG6803	China_rumen1125	China rumen	Bacteria	Firmicutes_A	Clostridia	Oscillospirales	CAG-272	UBA1740
RGIG6804	China_rumen1126	China rumen	Bacteria	Firmicutes	Bacilli	RFN20	CAG-826	UBA4951
RGIG6805	China_rumen1127	China rumen	Bacteria	Bacteroidota	Bacteroidia	Bacteroidales	Paludibacteraceae	RF16
RGIG6806	China_rumen1128	China rumen	Bacteria	Verrucomicrobiota	Lentisphaeria	UBA1407	UBA1407	UBA1407
RGIG6807	China_rumen1129	China rumen	Bacteria	Bacteroidota	Bacteroidia	Bacteroidales	Bacteroidaceae	Prevotella	Prevotella sp002353585
RGIG6808	China_rumen1130	China rumen	Bacteria	Spirochaetota	Spirochaetia	Treponematales	Treponemataceae	Treponema_D
RGIG6809	China_rumen1131	China rumen	Bacteria	Spirochaetota	Spirochaetia	Sphaerochaetales	Sphaerochaetaceae	UBA9732
RGIG6810	China_rumen1132	China rumen	Bacteria	Bacteroidota	Bacteroidia	Bacteroidales	Salinivirgaceae
RGIG6811	China_rumen1133	China rumen	Bacteria	Bacteroidota	Bacteroidia	Bacteroidales	Paludibacteraceae	UBA4363
RGIG6812	China_rumen1134	China rumen	Bacteria	Firmicutes_C	Negativicutes	Selenomonadales	Selenomonadaceae	UBA7018
RGIG6813	China_rumen1135	China rumen	Bacteria	Proteobacteria	Alphaproteobacteria	Rs-D84
RGIG6814	China_rumen1136	China rumen	Bacteria	Firmicutes_A	Clostridia	Lachnospirales	Lachnospiraceae	UBA3633
RGIG6815	China_rumen1137	China rumen	Bacteria	Spirochaetota	GWE2-31-10	GWE2-31-10
RGIG6816	China_rumen1138	China rumen	Bacteria	Firmicutes_A	Clostridia	Oscillospirales	CAG-272	CAG-724
RGIG6817	China_rumen1139	China rumen	Bacteria	Firmicutes_A	Clostridia	Oscillospirales	Ruminococcaceae	UBA3855
RGIG6818	China_rumen1140	China rumen	Bacteria	Spirochaetota	Spirochaetia	Treponematales	Treponemataceae	Treponema_D
RGIG6819	China_rumen1141	China rumen	Bacteria	Riflebacteria	Ozemobacteria	Ozemobacterales	Ozemobacteraceae	RUG334
RGIG6820	China_rumen1142	China rumen	Bacteria	Firmicutes_A	Clostridia_A	Christensenellales	CAG-74	RUG563
RGIG6821	China_rumen1143	China rumen	Bacteria	Bacteroidota	Bacteroidia	Bacteroidales	UBA3824	UBA3824
RGIG6822	China_rumen1144	China rumen	Bacteria	Firmicutes_A	Clostridia	Oscillospirales	CAG-272
RGIG6823	China_rumen1145	China rumen	Bacteria	Firmicutes_A	Clostridia	Oscillospirales	Ruminococcaceae	CAG-353
RGIG6824	China_rumen1146	China rumen	Bacteria	Firmicutes	Bacilli	RF39	CAG-1000	UBA6985
RGIG6825	China_rumen1147	China rumen	Bacteria	Firmicutes	Bacilli	Acholeplasmatales	Anaeroplasmataceae	Anaeroplasma
RGIG6826	China_rumen1148	China rumen	Bacteria	Firmicutes_A	Clostridia	Oscillospirales	Ruminococcaceae	Ruminococcus
RGIG6827	China_rumen1149	China rumen	Bacteria	Firmicutes	Bacilli	RF39	CAG-822
RGIG6828	China_rumen1150	China rumen	#N/A	Others	Others	Others	Others	Others	Others
RGIG6829	China_rumen1151	China rumen	Bacteria	Bacteroidota	Bacteroidia	Bacteroidales	Paludibacteraceae	UBA4345	UBA4345 sp002396385
RGIG6830	China_rumen1152	China rumen	Bacteria	Firmicutes_A	Clostridia	Oscillospirales	Oscillospiraceae
RGIG6831	China_rumen1153	China rumen	Bacteria	Bacteroidota	Bacteroidia	Bacteroidales	P3	UBA1711
RGIG6832	China_rumen1154	China rumen	Bacteria	Bacteroidota	Bacteroidia	Bacteroidales	Bacteroidaceae	Prevotella
RGIG6833	China_rumen1155	China rumen	Bacteria	Cyanobacteria	Vampirovibrionia	Gastranaerophilales	Gastranaerophilaceae	UBA1221
RGIG6834	China_rumen1156	China rumen	Bacteria	Chloroflexota	Anaerolineae	Anaerolineales	Anaerolineaceae
RGIG6835	China_rumen1157	China rumen	Bacteria	Verrucomicrobiota	Lentisphaeria	UBA1407	UBA1407	UBA1407
RGIG6836	China_rumen1158	China rumen	Bacteria	Firmicutes_A	Clostridia	Lachnospirales	Lachnospiraceae
RGIG6837	China_rumen1159	China rumen	Bacteria	Bacteroidota	Bacteroidia	Bacteroidales	WCHB1-69	UBA1195
RGIG6838	China_rumen1160	China rumen	Bacteria	Fibrobacterota	Fibrobacteria	Fibrobacterales	Fibrobacteraceae	Fibrobacter	Fibrobacter sp002210285
RGIG6839	China_rumen1161	China rumen	Bacteria	Bacteroidota	Bacteroidia	Bacteroidales	Bacteroidaceae	UBA1189
RGIG6840	China_rumen1162	China rumen	Bacteria	Firmicutes_A	Clostridia	Lachnospirales	Lachnospiraceae	UBA3766	UBA3766 sp002494135
RGIG6841	China_rumen1163	China rumen	Bacteria	Bacteroidota	Bacteroidia	Bacteroidales	Paludibacteraceae	RF16	RF16 sp002371785
RGIG6842	China_rumen1164	China rumen	Bacteria	Patescibacteria	Saccharimonadia	Saccharimonadales	Saccharimonadaceae	UBA2834
RGIG6843	China_rumen1165	China rumen	Bacteria	Firmicutes_A	Clostridia	Oscillospirales	Ruminococcaceae	Ruminococcus_D
RGIG6845	China_rumen1167	China rumen	Bacteria	Verrucomicrobiota	Kiritimatiellae	RFP12	UBA1067	UBA1067
RGIG6846	China_rumen1168	China rumen	Bacteria	Firmicutes	Bacilli	RF39	CAG-433
RGIG6847	China_rumen1169	China rumen	Bacteria	Bacteroidota	Bacteroidia	Bacteroidales	UBA1715	UBA1715
RGIG6848	China_rumen1170	China rumen	Bacteria	Firmicutes_A	Clostridia	Lachnospirales	Lachnospiraceae	Butyrivibrio	Butyrivibrio hungatei_B
RGIG6849	China_rumen1171	China rumen	Bacteria	Bacteroidota	Bacteroidia	Bacteroidales	UBA932	Bact-11	Bact-11 sp002361615
RGIG6850	China_rumen1172	China rumen	Bacteria	Firmicutes	Bacilli	Izemoplasmatales	UBA1188	UBA1188
RGIG6851	China_rumen1173	China rumen	Bacteria	Bacteroidota	Bacteroidia	Bacteroidales	Bacteroidaceae	Prevotella
RGIG6852	China_rumen1174	China rumen	Bacteria	Firmicutes_A	Clostridia	Oscillospirales	Oscillospiraceae	CAG-110
RGIG6853	China_rumen1175	China rumen	Bacteria	Bacteroidota	Bacteroidia	Bacteroidales	Bacteroidaceae	Prevotella
RGIG6854	China_rumen1176	China rumen	Bacteria	Firmicutes	Bacilli	RF39	CAG-611	UBA3789
RGIG6855	China_rumen1177	China rumen	Bacteria	Bacteroidota	Bacteroidia	Bacteroidales	Bacteroidaceae	UBA4372
RGIG6856	China_rumen1178	China rumen	Bacteria	Bacteroidota	Bacteroidia	Bacteroidales	Paludibacteraceae	UBA1723	UBA1723 sp002371265
RGIG6857	China_rumen1179	China rumen	Bacteria	Bacteroidota	Bacteroidia	Bacteroidales	F082	F082
RGIG6858	China_rumen1180	China rumen	Bacteria	Firmicutes_A	Clostridia	Oscillospirales	Oscillospiraceae	UBA738
RGIG6859	China_rumen1181	China rumen	Bacteria	Bacteroidota	Bacteroidia	Bacteroidales	Paludibacteraceae	RF16
RGIG6860	China_rumen1182	China rumen	Bacteria	Bacteroidota	Bacteroidia	Bacteroidales	Bacteroidaceae	Prevotella	Prevotella sp900315095
RGIG6861	China_rumen1183	China rumen	Bacteria	Spirochaetota	Spirochaetia	Treponematales	Treponemataceae	Treponema_D
RGIG6862	China_rumen1184	China rumen	Archaea	Thermoplasmatota	Thermoplasmata	Methanomassiliicoccales	Methanomethylophilaceae	ISO4-G1
RGIG6863	China_rumen1185	China rumen	Bacteria	Verrucomicrobiota	Kiritimatiellae	LD1-PB3	Lenti-01
RGIG6864	China_rumen1186	China rumen	Bacteria	Verrucomicrobiota	Lentisphaeria	Victivallales	UBA1829	UBA1732
RGIG6865	China_rumen1187	China rumen	Bacteria	Verrucomicrobiota	Kiritimatiellae	RFP12	UBA1067	UBA1067
RGIG6866	China_rumen1188	China rumen	Bacteria	Firmicutes_A	Clostridia	Oscillospirales	CAG-272	UBA1248
RGIG6867	China_rumen1189	China rumen	Bacteria	Patescibacteria	Saccharimonadia	Saccharimonadales	Saccharimonadaceae	UBA2866
RGIG6868	China_rumen1190	China rumen	Bacteria	Bacteroidota	Bacteroidia	Bacteroidales	WCHB1-69	F23-D06
RGIG6869	China_rumen1191	China rumen	Bacteria	Cyanobacteria	Vampirovibrionia	Gastranaerophilales	Gastranaerophilaceae	CAG-196
RGIG6870	China_rumen1192	China rumen	Bacteria	Firmicutes_A	Clostridia_A	Christensenellales	Christensenellaceae	QANA01
RGIG6871	China_rumen1193	China rumen	Bacteria	Spirochaetota	Spirochaetia	Treponematales	Treponemataceae	Treponema_D
RGIG6872	China_rumen1194	China rumen	Bacteria	Verrucomicrobiota	Verrucomicrobiae	Pedosphaerales	UBA1412	UBA1412
RGIG6873	China_rumen1195	China rumen	Bacteria	Firmicutes_A	Clostridia	Lachnospirales	Lachnospiraceae	Acetatifactor
RGIG6874	China_rumen1196	China rumen	Bacteria	Cyanobacteria	Vampirovibrionia	Gastranaerophilales	Gastranaerophilaceae
RGIG6875	China_rumen1197	China rumen	Bacteria	Firmicutes_A	Clostridia	Lachnospirales	Lachnospiraceae	NK4A136
RGIG6876	China_rumen1198	China rumen	Bacteria	Firmicutes_A	Clostridia	Lachnospirales	Lachnospiraceae	AC2028
RGIG6877	China_rumen1199	China rumen	Bacteria	Firmicutes	Bacilli	RF39	CAG-1000	UBA11963
RGIG6878	China_rumen1200	China rumen	Bacteria	Bacteroidota	Bacteroidia	Bacteroidales	UBA3824	UBA3824
RGIG6879	China_rumen1201	China rumen	Bacteria	Firmicutes_A	Clostridia_A	Christensenellales	UBA4651	UBA7867
RGIG6880	China_rumen1202	China rumen	Bacteria	Bacteroidota	Bacteroidia	Bacteroidales	Bacteroidaceae	Prevotella
RGIG6881	China_rumen1203	China rumen	Bacteria	Firmicutes_A	Clostridia	TANB77	CAG-508	CAG-492
RGIG6882	China_rumen1204	China rumen	Bacteria	Firmicutes	Bacilli	RFN20	CAG-826	UBA4951
RGIG6883	China_rumen1205	China rumen	Bacteria	Firmicutes	Bacilli	RF39	CAG-611	CAG-710
RGIG6884	China_rumen1206	China rumen	Bacteria	Firmicutes_A	Clostridia_A	Christensenellales	CAG-138	UBA3857
RGIG6885	China_rumen1207	China rumen	Bacteria	Bacteroidota	Bacteroidia	Bacteroidales	Bacteroidaceae	UBA4372
RGIG6886	China_rumen1208	China rumen	Bacteria	Patescibacteria	Saccharimonadia	Saccharimonadales	Saccharimonadaceae	UBA2834
RGIG6887	China_rumen1209	China rumen	Bacteria	Firmicutes_A	Clostridia	Oscillospirales	Ruminococcaceae	Firm-04
RGIG6888	China_rumen1210	China rumen	Bacteria	Firmicutes_A	Clostridia	Lachnospirales	Lachnospiraceae	UBA2868
RGIG6889	China_rumen1211	China rumen	Bacteria	Firmicutes_A	Clostridia_A	Christensenellales	CAG-74	RUG563
RGIG6890	China_rumen1212	China rumen	Bacteria	Bacteroidota	Bacteroidia	Bacteroidales	Paludibacteraceae	RF16	RF16 sp900321775
RGIG6891	China_rumen1213	China rumen	Bacteria	Spirochaetota	Spirochaetia	Treponematales	Treponemataceae	Treponema_D
RGIG6892	China_rumen1214	China rumen	Bacteria	Firmicutes_A	Clostridia	Lachnospirales	Lachnospiraceae	UBA1712-A
RGIG6893	China_rumen1215	China rumen	Bacteria	Firmicutes_A	Clostridia_A	Christensenellales	CAG-74	GCA-900199385
RGIG6894	China_rumen1216	China rumen	Bacteria	Bacteroidota	Bacteroidia	Bacteroidales	UBA3824	UBA3824
RGIG6895	China_rumen1217	China rumen	Bacteria	Bacteroidota	Bacteroidia	Bacteroidales	Bacteroidaceae	Prevotella
RGIG6896	China_rumen1218	China rumen	Bacteria	Bacteroidota	Bacteroidia	Bacteroidales	Paludibacteraceae	RF16
RGIG6897	China_rumen1219	China rumen	Bacteria	Firmicutes_A	Clostridia	Lachnospirales	Lachnospiraceae	Eubacterium_Q
RGIG6898	China_rumen1220	China rumen	Bacteria	Bacteroidota	Bacteroidia	Bacteroidales	Paludibacteraceae	RF16
RGIG6899	China_rumen1221	China rumen	Bacteria	Bacteroidota	Bacteroidia	Bacteroidales	Bacteroidaceae	UBA4372
RGIG6900	China_rumen1222	China rumen	Bacteria	Bacteroidota	Bacteroidia	Bacteroidales	WCHB1-69	F23-D06	F23-D06 sp900319925
RGIG6901	China_rumen1223	China rumen	Bacteria	Bacteroidota	Bacteroidia	Bacteroidales	P3	UBA1217
RGIG6902	China_rumen1224	China rumen	Bacteria	Firmicutes_A	Clostridia	Oscillospirales	Oscillospiraceae	CAG-110
RGIG6903	China_rumen1225	China rumen	Bacteria	Verrucomicrobiota	Kiritimatiellae	LD1-PB3	Lenti-01
RGIG6904	China_rumen1226	China rumen	Bacteria	Firmicutes_A	Clostridia	Lachnospirales	Lachnospiraceae	Eubacterium_J
RGIG6905	China_rumen1227	China rumen	Archaea	Thermoplasmatota	Thermoplasmata	Methanomassiliicoccales	Methanomethylophilaceae	ISO4-G1
RGIG6906	China_rumen1228	China rumen	Bacteria	Bacteroidota	Bacteroidia	Bacteroidales	Bacteroidaceae	Prevotella
RGIG6907	China_rumen1229	China rumen	Bacteria	Bacteroidota	Bacteroidia	Bacteroidales	Bacteroidaceae	Prevotella
RGIG6908	China_rumen1230	China rumen	Archaea	Thermoplasmatota	Thermoplasmata	Methanomassiliicoccales	Methanomethylophilaceae	ISO4-G1
RGIG6909	China_rumen1231	China rumen	Bacteria	Spirochaetota	GWE2-31-10	GWE2-31-10	GWE2-31-10
RGIG6910	China_rumen1232	China rumen	Bacteria	Bacteroidota	Bacteroidia	Bacteroidales	Bacteroidaceae	UBA4334
RGIG6912	China_rumen1234	China rumen	Bacteria	Bacteroidota	Bacteroidia	Bacteroidales	UBA932	RC9
RGIG6913	China_rumen1235	China rumen	Bacteria	Patescibacteria	Saccharimonadia	Saccharimonadales	Saccharimonadaceae	UBA2834
RGIG6914	China_rumen1236	China rumen	Bacteria	Spirochaetota	Spirochaetia	Treponematales	Treponemataceae	Treponema_D
RGIG6915	China_rumen1237	China rumen	Archaea	Thermoplasmatota	Thermoplasmata	Methanomassiliicoccales	Methanomethylophilaceae	ISO4-G1
RGIG6916	China_rumen1238	China rumen	Bacteria	Bacteroidota	Bacteroidia	Bacteroidales	Bacteroidaceae	Prevotella
RGIG6917	China_rumen1239	China rumen	Bacteria	Firmicutes_A	Clostridia	Oscillospirales	Oscillospiraceae	UBA738
RGIG6918	China_rumen1240	China rumen	Bacteria	Bacteroidota	Bacteroidia	Bacteroidales	UBA3824	UBA3824
RGIG6919	China_rumen1241	China rumen	Bacteria	Firmicutes_A	Clostridia	Lachnospirales	Lachnospiraceae
RGIG6920	China_rumen1242	China rumen	Bacteria	Bacteroidota	Bacteroidia	Bacteroidales	Bacteroidaceae	UBA4334
RGIG6921	China_rumen1243	China rumen	Bacteria	Firmicutes_A	Clostridia	Oscillospirales	Oscillospiraceae	RUG678
RGIG6922	China_rumen1244	China rumen	Bacteria	Patescibacteria	Saccharimonadia	Saccharimonadales	Saccharimonadaceae	UBA2834
RGIG6923	China_rumen1245	China rumen	Bacteria	Bacteroidota	Bacteroidia	Bacteroidales	WCHB1-69	F23-D06
RGIG6924	China_rumen1246	China rumen	Bacteria	Bacteroidota	Bacteroidia	Bacteroidales	UBA932	RC9	RC9 sp900167895
RGIG6926	China_rumen1248	China rumen	Bacteria	Firmicutes	Bacilli	RFN20	CAG-826	UBA4951
RGIG6927	China_rumen1249	China rumen	Bacteria	Bacteroidota	Bacteroidia	Bacteroidales	F082	F082
RGIG6928	China_rumen1250	China rumen	Bacteria	Firmicutes_A	Clostridia_A	Christensenellales	CAG-74	UBA2862
RGIG6929	China_rumen1251	China rumen	Bacteria	Firmicutes_A	Clostridia	Saccharofermentanales	Saccharofermentanaceae	Saccharofermentans
RGIG6930	China_rumen1252	China rumen	Bacteria	Verrucomicrobiota	Lentisphaeria	Victivallales	UBA1829	UBA1732
RGIG8293	China_rumen1784	China rumen	Bacteria	Spirochaetota	Spirochaetia	Treponematales	Treponemataceae	Treponema_D
RGIG8288	China_rumen1779	China rumen	Bacteria	Firmicutes_A	Clostridia_A	Christensenellales	UBA1242	UMGS687
RGIG8289	China_rumen1780	China rumen	Bacteria	Spirochaetota	Spirochaetia	Sphaerochaetales	Sphaerochaetaceae	UBA9732
RGIG8290	China_rumen1781	China rumen	Bacteria	Firmicutes_A	Clostridia	Lachnospirales	Lachnospiraceae	UBA1267
RGIG8292	China_rumen1783	China rumen	Bacteria	Firmicutes_A	Clostridia	Lachnospirales	Lachnospiraceae
RGIG8291	China_rumen1782	China rumen	Bacteria	Firmicutes_A	Clostridia	Oscillospirales	QAMX01
RGIG8294	China_rumen1785	China rumen	Bacteria	Firmicutes_A	Clostridia	Saccharofermentanales	Saccharofermentanaceae	Saccharofermentans
RGIG8295	China_rumen1786	China rumen	Bacteria	Firmicutes_A	Clostridia	Oscillospirales	CAG-272
RGIG8296	China_rumen1787	China rumen	Bacteria	Bacteroidota	Bacteroidia	Bacteroidales	WCHB1-69	UBA1195
RGIG8297	China_rumen1788	China rumen	Bacteria	Proteobacteria	Alphaproteobacteria	UBA3830	UBA3830	UBA3830
RGIG8298	China_rumen1789	China rumen	Bacteria	Firmicutes_C	Negativicutes	Selenomonadales	Selenomonadaceae	UBA7018
RGIG8299	China_rumen1790	China rumen	Bacteria	Firmicutes_A	Clostridia	Lachnospirales	Lachnospiraceae	ISDg
RGIG8300	China_rumen1791	China rumen	Bacteria	Firmicutes_A	Clostridia	Oscillospirales	UBA644
RGIG8301	China_rumen1792	China rumen	Bacteria	Bacteroidota	Bacteroidia	Bacteroidales	Bacteroidaceae	UBA1786
RGIG8304	China_rumen1795	China rumen	Bacteria	Spirochaetota	Spirochaetia	Sphaerochaetales	Sphaerochaetaceae
RGIG8302	China_rumen1793	China rumen	Bacteria	Firmicutes_A	Clostridia	Lachnospirales	Lachnospiraceae	Eubacterium_F
RGIG8303	China_rumen1794	China rumen	Bacteria	Spirochaetota	Spirochaetia	Sphaerochaetales	Sphaerochaetaceae	UBA9732
RGIG8305	China_rumen1796	China rumen	Bacteria	Firmicutes_A	Clostridia_A	Christensenellales	CAG-138	UBA3857
RGIG8306	China_rumen1797	China rumen	Bacteria	Firmicutes_A	Clostridia	Lachnospirales	Lachnospiraceae
RGIG8307	China_rumen1798	China rumen	Bacteria	Spirochaetota	Spirochaetia	Treponematales	Treponemataceae	Treponema_D
RGIG8308	China_rumen1799	China rumen	Bacteria	Bacteroidota	Bacteroidia	Bacteroidales	Muribaculaceae
RGIG8309	China_rumen1800	China rumen	Bacteria	Firmicutes_A	Clostridia	Oscillospirales	Acutalibacteraceae	RUG420
RGIG8310	China_rumen1801	China rumen	Bacteria	Firmicutes_A	Clostridia_A	Christensenellales	CAG-917	CAG-475
RGIG8311	China_rumen1802	China rumen	Bacteria	Bacteroidota	Bacteroidia	Bacteroidales	WCHB1-69	F23-D06
RGIG8312	China_rumen1803	China rumen	Bacteria	Firmicutes_A	Clostridia_A	Christensenellales	CAG-74	SFMI01
RGIG8316	China_rumen1807	China rumen	Bacteria	Bacteroidota	Bacteroidia	Bacteroidales	UBA3824	UBA3824
RGIG8313	China_rumen1804	China rumen	Bacteria	Firmicutes_A	Clostridia	Lachnospirales	Lachnospiraceae	G11
RGIG8314	China_rumen1805	China rumen	Bacteria	Bacteroidota	Bacteroidia	Bacteroidales	Paludibacteraceae	RUG163
RGIG8315	China_rumen1806	China rumen	Bacteria	Firmicutes_A	Clostridia	Lachnospirales	Lachnospiraceae	NK4A144
RGIG8317	China_rumen1808	China rumen	Bacteria	Desulfobacterota	Desulfovibrionia	Desulfovibrionales	Desulfovibrionaceae	Desulfovibrio
RGIG8318	China_rumen1809	China rumen	Bacteria	Firmicutes_A	Clostridia	Oscillospirales	CAG-382	UBA1752
RGIG8319	China_rumen1810	China rumen	Bacteria	Firmicutes_A	Clostridia_A	Christensenellales	CAG-74	UBA1224
RGIG8320	China_rumen1811	China rumen	Bacteria	Firmicutes	Bacilli	Erysipelotrichales	Erysipelotrichaceae	UBA636
RGIG8321	China_rumen1812	China rumen	Bacteria	Firmicutes_A	Clostridia	UBA1212	UBA1212	UBA1212	UBA1212 sp002309655
RGIG8322	China_rumen1813	China rumen	Bacteria	Bacteroidota	Bacteroidia	Bacteroidales	Paludibacteraceae	RF16	RF16 sp002310195
RGIG8323	China_rumen1814	China rumen	Bacteria	Actinobacteriota	Coriobacteriia	Coriobacteriales	Eggerthellaceae	W1P20-047
RGIG8324	China_rumen1815	China rumen	Bacteria	Firmicutes_A	Clostridia	Eubacteriales	Anaerofustaceae
RGIG8327	China_rumen1818	China rumen	Bacteria	Firmicutes_A	Clostridia	Oscillospirales
RGIG8325	China_rumen1816	China rumen	Archaea	Thermoplasmatota	Thermoplasmata	Methanomassiliicoccales	Methanomethylophilaceae	ISO4-G1
RGIG8328	China_rumen1819	China rumen	Archaea	Thermoplasmatota	Thermoplasmata	Methanomassiliicoccales	Methanomethylophilaceae
RGIG8329	China_rumen1820	China rumen	Bacteria	Myxococcota	Bradimonadia	Bradymonadales	UBA4248	UBA4248
RGIG8330	China_rumen1821	China rumen	Bacteria	Actinobacteriota	Coriobacteriia	Coriobacteriales	Eggerthellaceae
RGIG8340	China_rumen1831	China rumen	Bacteria	Firmicutes_A	Clostridia	Lachnospirales	Lachnospiraceae	CAG-194
RGIG8332	China_rumen1823	China rumen	Bacteria	Firmicutes_A	Clostridia	Oscillospirales	CAG-382	UMGS882
RGIG8333	China_rumen1824	China rumen	Bacteria	Firmicutes_A	Clostridia	Oscillospirales	Acutalibacteraceae	CAG-177
RGIG8334	China_rumen1825	China rumen	Bacteria	Firmicutes_A	Clostridia	Lachnospirales	Lachnospiraceae	UBA3766
RGIG8335	China_rumen1826	China rumen	Bacteria	Verrucomicrobiota	Lentisphaeria	UBA1407	UBA1407
RGIG8336	China_rumen1827	China rumen	Bacteria	Firmicutes_A	Clostridia	Oscillospirales	Acutalibacteraceae
RGIG8339	China_rumen1830	China rumen	Bacteria	Firmicutes_A	Clostridia_A	Christensenellales	Borkfalkiaceae
RGIG8337	China_rumen1828	China rumen	Bacteria	Bacteroidota	Bacteroidia	Bacteroidales	UBA932	RC9
RGIG8338	China_rumen1829	China rumen	Bacteria	Desulfobacterota	Desulfovibrionia	Desulfovibrionales	Desulfovibrionaceae	Desulfovibrio
RGIG8341	China_rumen1832	China rumen	Bacteria	Proteobacteria	Gammaproteobacteria	Burkholderiales	Rhodocyclaceae	UBA2357
RGIG8344	China_rumen1835	China rumen	Bacteria	Bacteroidota	Bacteroidia	Bacteroidales	F082	F082
RGIG8342	China_rumen1833	China rumen	Bacteria	Bacteroidota	Bacteroidia	Bacteroidales	Paludibacteraceae	UBA4345	UBA4345 sp002396385
RGIG8343	China_rumen1834	China rumen	Bacteria	Firmicutes_A	Clostridia	Lachnospirales	Lachnospiraceae	ISDg
RGIG8345	China_rumen1836	China rumen	Bacteria	Firmicutes_A	Clostridia	UBA1212	UBA1255	UBA1255
RGIG8346	China_rumen1837	China rumen	Bacteria	Firmicutes_A	Clostridia	Oscillospirales	Ruminococcaceae	UBA3855
RGIG8347	China_rumen1838	China rumen	Bacteria	Firmicutes_A	Clostridia	Oscillospirales	Oscillospiraceae	UBA1246
RGIG8348	China_rumen1839	China rumen	Bacteria	Firmicutes_A	Clostridia	Oscillospirales	CAG-272	CAG-390
RGIG8349	China_rumen1840	China rumen	Bacteria	Spirochaetota	Spirochaetia	Treponematales	Treponemataceae	Treponema_D
RGIG8354	China_rumen1845	China rumen	Bacteria	Desulfobacterota	Desulfovibrionia	Desulfovibrionales	Desulfovibrionaceae	Desulfovibrio
RGIG8350	China_rumen1841	China rumen	Bacteria	Desulfobacterota	Desulfovibrionia	Desulfovibrionales	Desulfovibrionaceae
RGIG8351	China_rumen1842	China rumen	Bacteria	Firmicutes_A	Clostridia	Lachnospirales	Lachnospiraceae	UBA3766
RGIG8352	China_rumen1843	China rumen	Bacteria	Bacteroidota	Bacteroidia	Bacteroidales	Bacteroidaceae	Prevotella
RGIG8353	China_rumen1844	China rumen	Bacteria	Desulfobacterota	Desulfovibrionia	Desulfovibrionales	Desulfovibrionaceae	Mailhella
RGIG8367	China_rumen1858	China rumen	Bacteria	Firmicutes_A	Clostridia	Oscillospirales	Ruminococcaceae
RGIG8355	China_rumen1846	China rumen	Bacteria	Firmicutes_A	Clostridia	Oscillospirales	Ruminococcaceae	HUN007
RGIG8356	China_rumen1847	China rumen	Bacteria	Bacteroidota	Bacteroidia	Bacteroidales	P3
RGIG8357	China_rumen1848	China rumen	Bacteria	Firmicutes_A	Clostridia	Oscillospirales	CAG-272	UMGS1865
RGIG8358	China_rumen1849	China rumen	Archaea	Halobacteriota	Methanosarcinia	Methanosarcinales	Methanosarcinaceae	Methanimicrococcus
RGIG8359	China_rumen1850	China rumen	Bacteria	Firmicutes_A	Clostridia_A	Christensenellales	CAG-138	UBA3857
RGIG8360	China_rumen1851	China rumen	Bacteria	Firmicutes_A	Clostridia	TANB77	CAG-508	CAG-269
RGIG8361	China_rumen1852	China rumen	Bacteria	Desulfobacterota	Desulfovibrionia	Desulfovibrionales	Desulfovibrionaceae	Desulfovibrio
RGIG8362	China_rumen1853	China rumen	Bacteria	Verrucomicrobiota	Lentisphaeria	Victivallales	UBA1829	UBA11452
RGIG8363	China_rumen1854	China rumen	Bacteria	Desulfobacterota	Desulfovibrionia	Desulfovibrionales	Desulfovibrionaceae	Desulfovibrio
RGIG8364	China_rumen1855	China rumen	Bacteria	Firmicutes_A	Clostridia	Lachnospirales	Lachnospiraceae	UBA3774
RGIG8365	China_rumen1856	China rumen	Bacteria	Firmicutes_A	Clostridia_A	Christensenellales	CAG-74	Firm-10
RGIG8366	China_rumen1857	China rumen	Bacteria	Firmicutes	Bacilli	RFN20	CAG-826
RGIG8368	China_rumen1859	China rumen	Bacteria	Verrucomicrobiota	Kiritimatiellae	RFP12	UBA1067
RGIG8369	China_rumen1860	China rumen	Bacteria	Proteobacteria	Alphaproteobacteria	RF32	CAG-239	UBA1254
RGIG8370	China_rumen1861	China rumen	Bacteria	Patescibacteria	Saccharimonadia	Saccharimonadales	Saccharimonadaceae	UBA2866
RGIG8371	China_rumen1862	China rumen	Bacteria	Firmicutes_A	Clostridia	Lachnospirales	Lachnospiraceae	Acetatifactor
RGIG8372	China_rumen1863	China rumen	Bacteria	Proteobacteria	Alphaproteobacteria	RF32	CAG-239	UBA1254
RGIG8373	China_rumen1864	China rumen	Bacteria	Bacteroidota	Bacteroidia	Bacteroidales	WCHB1-69	UBA1195
RGIG8374	China_rumen1865	China rumen	Bacteria	Firmicutes_A	Clostridia	Oscillospirales	CAG-382	UBA1752
RGIG8375	China_rumen1866	China rumen	Bacteria	Firmicutes_A	Clostridia	Lachnospirales	Lachnospiraceae	ISDg
RGIG8376	China_rumen1867	China rumen	Bacteria	Spirochaetota	Spirochaetia	Sphaerochaetales	Sphaerochaetaceae	UBA9732
RGIG8384	China_rumen1875	China rumen	Bacteria	Firmicutes_A	Clostridia	Oscillospirales	CAG-272
RGIG8377	China_rumen1868	China rumen	Bacteria	Firmicutes_A	Clostridia	Oscillospirales	CAG-272	UBA1740
RGIG8378	China_rumen1869	China rumen	Bacteria	Firmicutes_A	Clostridia	Oscillospirales	CAG-272
RGIG8379	China_rumen1870	China rumen	Bacteria	Firmicutes_A	Clostridia	Oscillospirales	Oscillospiraceae	CAG-110
RGIG8381	China_rumen1872	China rumen	Bacteria	Patescibacteria	Gracilibacteria	Absconditabacterales	X112	UBA3291
RGIG8380	China_rumen1871	China rumen	Bacteria	Firmicutes_A	Clostridia_A	Christensenellales	Borkfalkiaceae	UBA1259
RGIG8382	China_rumen1873	China rumen	Bacteria	Bacteroidota	Bacteroidia	Bacteroidales	Bacteroidaceae	UBA1179
RGIG8383	China_rumen1874	China rumen	Bacteria	Bacteroidota	Bacteroidia	Bacteroidales	WCHB1-69
RGIG8388	China_rumen1879	China rumen	Bacteria	Bacteroidota	Bacteroidia	Bacteroidales	Paludibacteraceae	RF16
RGIG8385	China_rumen1876	China rumen	Bacteria	Bacteroidota	Bacteroidia	Bacteroidales	UBA3824	UBA3824
RGIG8386	China_rumen1877	China rumen	Bacteria	Firmicutes	Bacilli	RF39	CAG-1000
RGIG8387	China_rumen1878	China rumen	Bacteria	Firmicutes_A	Clostridia	Lachnospirales	Lachnospiraceae	XBB1006
RGIG8389	China_rumen1880	China rumen	Bacteria	Bacteroidota	Bacteroidia	Bacteroidales	UBA932	RC9
RGIG8391	China_rumen1882	China rumen	Bacteria	Bacteroidota	Bacteroidia	Bacteroidales	UBA932	RC9
RGIG8390	China_rumen1881	China rumen	Bacteria	Firmicutes_A	Clostridia	Saccharofermentanales	Saccharofermentanaceae	Saccharofermentans
RGIG8393	China_rumen1884	China rumen	Bacteria	Firmicutes_A	Clostridia_A	Christensenellales	Borkfalkiaceae	UBA10281
RGIG8392	China_rumen1883	China rumen	Bacteria	Bacteroidota	Bacteroidia	Bacteroidales	Bacteroidaceae	UBA4334
RGIG8394	China_rumen1885	China rumen	Bacteria	Firmicutes	Bacilli	Erysipelotrichales	Erysipelotrichaceae	UBA1783
RGIG8395	China_rumen1886	China rumen	Bacteria	Firmicutes_A	Clostridia	Oscillospirales	CAG-272	UMGS1225
RGIG8396	China_rumen1887	China rumen	Bacteria	Firmicutes_A	Clostridia	Peptostreptococcales	Anaerovoracaceae
RGIG8400	China_rumen1891	China rumen	Bacteria	Firmicutes_A	Clostridia	Lachnospirales	Lachnospiraceae	UBA2868
RGIG8397	China_rumen1888	China rumen	Bacteria	Firmicutes_A	Clostridia	Oscillospirales	CAG-272	UMGS1002
RGIG8398	China_rumen1889	China rumen	Bacteria	Firmicutes_A	Clostridia	UBA1212	UBA1212	UBA1212	UBA1212 sp002308595
RGIG8399	China_rumen1890	China rumen	Bacteria	Firmicutes_A	Clostridia	Oscillospirales	CAG-272
RGIG7923	China_rumen1414	China rumen	Bacteria	Bacteroidota	Bacteroidia	Bacteroidales	Bacteroidaceae	Prevotella
RGIG7924	China_rumen1415	China rumen	Bacteria	Bacteroidota	Bacteroidia	Bacteroidales	UBA932	RC9
RGIG7925	China_rumen1416	China rumen	Bacteria	Planctomycetota	Planctomycetes	Pirellulales	Thermoguttaceae
RGIG7926	China_rumen1417	China rumen	Bacteria	Firmicutes_A	Clostridia	Lachnospirales	Lachnospiraceae	CAG-194
RGIG7927	China_rumen1418	China rumen	Bacteria	Desulfobacterota	Desulfovibrionia	Desulfovibrionales	Desulfovibrionaceae	Desulfovibrio
RGIG7928	China_rumen1419	China rumen	Bacteria	Firmicutes_A	Clostridia	Oscillospirales	Acutalibacteraceae	CAG-177
RGIG7929	China_rumen1420	China rumen	Bacteria	Firmicutes_A	Clostridia	Lachnospirales	Lachnospiraceae	Acetatifactor
RGIG7930	China_rumen1421	China rumen	Bacteria	Firmicutes_A	Clostridia	Oscillospirales	Oscillospiraceae	RUG678
RGIG7931	China_rumen1422	China rumen	Bacteria	Armatimonadota	UBA5829	UBA5829	UBA5829
RGIG7932	China_rumen1423	China rumen	Bacteria	Bacteroidota	Bacteroidia	Bacteroidales	Bacteroidaceae	UBA4372
RGIG7933	China_rumen1424	China rumen	Bacteria	Firmicutes_A	Clostridia	Oscillospirales	Acutalibacteraceae	CAG-177
RGIG7934	China_rumen1425	China rumen	Bacteria	Firmicutes_A	Clostridia	Oscillospirales	Acutalibacteraceae	UBA737
RGIG7935	China_rumen1426	China rumen	Bacteria	Firmicutes_A	Clostridia	Lachnospirales	Lachnospiraceae	CAG-791	CAG-791 sp900320325
RGIG7936	China_rumen1427	China rumen	Bacteria	Firmicutes_A	Clostridia	Lachnospirales	Lachnospiraceae	UBA1267
RGIG7937	China_rumen1428	China rumen	Bacteria	Proteobacteria	Gammaproteobacteria	Burkholderiales	Burkholderiaceae	Oxalobacter
RGIG7938	China_rumen1429	China rumen	Bacteria	Firmicutes_A	Clostridia	Oscillospirales	CAG-272	UBA1740
RGIG7939	China_rumen1430	China rumen	Bacteria	Spirochaetota	Spirochaetia	Sphaerochaetales	Sphaerochaetaceae	UBA9732
RGIG7940	China_rumen1431	China rumen	Bacteria	Bacteroidota	Bacteroidia	Bacteroidales	Muribaculaceae	C941
RGIG7941	China_rumen1432	China rumen	Bacteria	Firmicutes_A	Clostridia	Oscillospirales	Ruminococcaceae	Ruminiclostridium_E
RGIG7942	China_rumen1433	China rumen	Bacteria	Spirochaetota	Spirochaetia	Treponematales	Treponemataceae	Treponema_D
RGIG7943	China_rumen1434	China rumen	Bacteria	Firmicutes_A	Clostridia	Oscillospirales	Oscillospiraceae	UBA1777
RGIG7944	China_rumen1435	China rumen	Bacteria	Firmicutes_A	Clostridia	Lachnospirales	Lachnospiraceae
RGIG7945	China_rumen1436	China rumen	Bacteria	Firmicutes_A	Clostridia	Oscillospirales	Acutalibacteraceae	CAG-177
RGIG7946	China_rumen1437	China rumen	Bacteria	Bacteroidota	Bacteroidia	Bacteroidales	UBA932	RC9
RGIG7947	China_rumen1438	China rumen	Bacteria	Firmicutes_A	Clostridia_A	Christensenellales	CAG-74	RUG563
RGIG7948	China_rumen1439	China rumen	Bacteria	Bacteroidota	Bacteroidia	Bacteroidales	Muribaculaceae	C941
RGIG7949	China_rumen1440	China rumen	Bacteria	Firmicutes_A	Clostridia	Oscillospirales	Oscillospiraceae
RGIG7950	China_rumen1441	China rumen	Bacteria	Spirochaetota	Spirochaetia	Treponematales	Treponemataceae	Treponema_D
RGIG7951	China_rumen1442	China rumen	Bacteria	Bacteroidota	Bacteroidia	Bacteroidales	UBA932	UBA1232
RGIG7952	China_rumen1443	China rumen	Bacteria	Firmicutes_A	Clostridia	Oscillospirales	Acutalibacteraceae	RUG806
RGIG7953	China_rumen1444	China rumen	Bacteria	Planctomycetota	Planctomycetes	Pirellulales	Thermoguttaceae	RUG695
RGIG7954	China_rumen1445	China rumen	Bacteria	Firmicutes_A	Clostridia	Saccharofermentanales	Saccharofermentanaceae	Firm-16
RGIG7955	China_rumen1446	China rumen	Bacteria	Firmicutes_A	Clostridia	Oscillospirales	Ruminococcaceae	Firm-04
RGIG7956	China_rumen1447	China rumen	Bacteria	Firmicutes_A	Clostridia	Oscillospirales	Acutalibacteraceae	RUG806
RGIG7957	China_rumen1448	China rumen	Bacteria	Firmicutes_A	Clostridia	Saccharofermentanales	Saccharofermentanaceae	Firm-16
RGIG7958	China_rumen1449	China rumen	Bacteria	Patescibacteria	Saccharimonadia	Saccharimonadales	Saccharimonadaceae	UBA2834
RGIG7959	China_rumen1450	China rumen	Bacteria	Firmicutes_A	Clostridia	Lachnospirales	Lachnospiraceae	UBA2868
RGIG7960	China_rumen1451	China rumen	Bacteria	Patescibacteria	Saccharimonadia	Saccharimonadales	Saccharimonadaceae	UBA2866
RGIG7961	China_rumen1452	China rumen	Bacteria	Bacteroidota	Bacteroidia	Bacteroidales	UBA932	RC9
RGIG7962	China_rumen1453	China rumen	Bacteria	Fibrobacterota	Fibrobacteria	Fibrobacterales	Fibrobacteraceae	Fibrobacter
RGIG7963	China_rumen1454	China rumen	Bacteria	Firmicutes_A	Clostridia	Lachnospirales	Lachnospiraceae	NK4A136
RGIG7964	China_rumen1455	China rumen	Bacteria	Firmicutes_B	Dehalobacteriia	UBA4068	UBA4068
RGIG7965	China_rumen1456	China rumen	Bacteria	Bacteroidota	Bacteroidia	Bacteroidales	UBA1715	UBA1715
RGIG7966	China_rumen1457	China rumen	Bacteria	Firmicutes_A	Clostridia	Oscillospirales	Acutalibacteraceae
RGIG7967	China_rumen1458	China rumen	Bacteria	Bacteroidota	Bacteroidia	Bacteroidales	UBA932	RC9
RGIG7968	China_rumen1459	China rumen	Bacteria	Bacteroidota	Bacteroidia	Bacteroidales	Muribaculaceae
RGIG7969	China_rumen1460	China rumen	Bacteria	Firmicutes_A	Clostridia	Lachnospirales	Lachnospiraceae	UBA1258
RGIG7970	China_rumen1461	China rumen	Bacteria	Proteobacteria	Alphaproteobacteria	Rs-D84	Rs-D84	Rs-D84
RGIG7971	China_rumen1462	China rumen	Bacteria	Firmicutes_A	Clostridia	Lachnospirales	Lachnospiraceae	UBA1712
RGIG7972	China_rumen1463	China rumen	Bacteria	Bacteroidota	Bacteroidia	Bacteroidales	Bacteroidaceae	Prevotella
RGIG7973	China_rumen1464	China rumen	Bacteria	Firmicutes_A	Clostridia	Lachnospirales	Lachnospiraceae	UBA1201
RGIG7974	China_rumen1465	China rumen	Bacteria	Bacteroidota	Bacteroidia	Bacteroidales	P3	UBA1711
RGIG7975	China_rumen1466	China rumen	Bacteria	Firmicutes_A	Clostridia_A	Christensenellales	CAG-74
RGIG7976	China_rumen1467	China rumen	Bacteria	Firmicutes_A	Clostridia	Saccharofermentanales	Saccharofermentanaceae	Saccharofermentans
RGIG7977	China_rumen1468	China rumen	Bacteria	Desulfobacterota	Desulfuromonadia
RGIG7978	China_rumen1469	China rumen	Bacteria	Firmicutes_A	Clostridia	Oscillospirales	Ruminococcaceae	Firm-04
RGIG7979	China_rumen1470	China rumen	Bacteria	Bacteroidota	Bacteroidia	Bacteroidales	Paludibacteraceae	UBA1181
RGIG7980	China_rumen1471	China rumen	Bacteria	Firmicutes_A	Clostridia	Oscillospirales	CAG-272	UMGS1696
RGIG7981	China_rumen1472	China rumen	Bacteria	Firmicutes_A	Clostridia_A	Christensenellales	CAG-74	SFMI01
RGIG7982	China_rumen1473	China rumen	Bacteria	Firmicutes_A	Clostridia	Oscillospirales	Ruminococcaceae	Firm-04
RGIG7983	China_rumen1474	China rumen	Bacteria	Bacteroidota	Bacteroidia	Bacteroidales	F082	F082
RGIG7984	China_rumen1475	China rumen	Bacteria	Firmicutes_A	Clostridia	Oscillospirales	Oscillospiraceae
RGIG7985	China_rumen1476	China rumen	Bacteria	Firmicutes	Bacilli	RF39	CAG-611	UBA3789
RGIG7986	China_rumen1477	China rumen	Bacteria	Firmicutes_A	Clostridia	Lachnospirales	Lachnospiraceae
RGIG7987	China_rumen1478	China rumen	Bacteria	Firmicutes_A	Clostridia	Lachnospirales	Lachnospiraceae	NK4A144
RGIG7988	China_rumen1479	China rumen	Bacteria	Firmicutes_A	Clostridia_A	Christensenellales	CAG-74	SFHK01
RGIG7989	China_rumen1480	China rumen	Bacteria	Firmicutes_A	Clostridia	Oscillospirales	Butyricicoccaceae	UBA4644
RGIG7990	China_rumen1481	China rumen	Bacteria	Firmicutes_A	Clostridia	Saccharofermentanales	Saccharofermentanaceae	Saccharofermentans
RGIG7991	China_rumen1482	China rumen	Bacteria	Bacteroidota	Bacteroidia	Bacteroidales	UBA932	RC9
RGIG7992	China_rumen1483	China rumen	Bacteria	Bacteroidota	Bacteroidia	Bacteroidales	Bacteroidaceae	UBA4372
RGIG7993	China_rumen1484	China rumen	Bacteria	Bacteroidota	Bacteroidia	Bacteroidales	UBA932	RC9	RC9 sp900319685
RGIG7994	China_rumen1485	China rumen	Bacteria	Patescibacteria	Saccharimonadia	Saccharimonadales	Saccharimonadaceae	UBA2866
RGIG7995	China_rumen1486	China rumen	Bacteria	Firmicutes_A	Clostridia_A	Christensenellales	Borkfalkiaceae	UBA1259	UBA1259 sp002308755
RGIG7996	China_rumen1487	China rumen	Bacteria	Bacteroidota	Bacteroidia	Bacteroidales	Bacteroidaceae	Prevotella
RGIG7997	China_rumen1488	China rumen	Bacteria	Firmicutes_A	Clostridia	Oscillospirales	Oscillospiraceae	UBA1777
RGIG7998	China_rumen1489	China rumen	Bacteria	Firmicutes_A	Clostridia	Lachnospirales	Lachnospiraceae	UBA1267
RGIG7999	China_rumen1490	China rumen	Bacteria	Firmicutes	Bacilli	Erysipelotrichales	Erysipelotrichaceae	UBA636
RGIG8000	China_rumen1491	China rumen	Bacteria	Firmicutes_A	Clostridia	Lachnospirales	Lachnospiraceae
RGIG8001	China_rumen1492	China rumen	Bacteria	Firmicutes_A	Clostridia	Saccharofermentanales	Saccharofermentanaceae	Firm-16
RGIG8002	China_rumen1493	China rumen	Bacteria	Firmicutes_A	Clostridia	Oscillospirales
RGIG8003	China_rumen1494	China rumen	Bacteria	Firmicutes_A	Clostridia_A	Christensenellales	CAG-74	RUG563
RGIG8004	China_rumen1495	China rumen	Bacteria	Firmicutes	Bacilli	Erysipelotrichales	Erysipelotrichaceae	UBA636
RGIG8005	China_rumen1496	China rumen	Bacteria	Bacteroidota	Bacteroidia	Bacteroidales	UBA932	RC9
RGIG8006	China_rumen1497	China rumen	Bacteria	Firmicutes_A	Clostridia	Lachnospirales	Lachnospiraceae
RGIG8007	China_rumen1498	China rumen	Bacteria	Bacteroidota	Bacteroidia	Bacteroidales	UBA932	RC9
RGIG8008	China_rumen1499	China rumen	Bacteria	Firmicutes_A	Clostridia	Lachnospirales	Lachnospiraceae	UBA2868
RGIG8009	China_rumen1500	China rumen	Bacteria	Firmicutes_A	Clostridia	Oscillospirales	Oscillospiraceae
RGIG8010	China_rumen1501	China rumen	Bacteria	Bacteroidota	Bacteroidia	Bacteroidales	Bacteroidaceae	UBA4372
RGIG8011	China_rumen1502	China rumen	Bacteria	Firmicutes_A	Clostridia	Lachnospirales	Lachnospiraceae	AC2028
RGIG8012	China_rumen1503	China rumen	Bacteria	Firmicutes_A	Clostridia	Lachnospirales	Lachnospiraceae	Butyrivibrio
RGIG8013	China_rumen1504	China rumen	Bacteria	Firmicutes_A	Clostridia	Lachnospirales	Lachnospiraceae	UBA2868
RGIG8014	China_rumen1505	China rumen	Bacteria	Bacteroidota	Bacteroidia	Bacteroidales	Bacteroidaceae	Prevotella	Prevotella ruminicola
RGIG8015	China_rumen1506	China rumen	Bacteria	Firmicutes_A	Clostridia	Oscillospirales	Acutalibacteraceae	CAG-177
RGIG8016	China_rumen1507	China rumen	Bacteria	Firmicutes_A	Clostridia	UMGS1883	UMGS1883	UMGS1540
RGIG8017	China_rumen1508	China rumen	Bacteria	Firmicutes_A	Clostridia	Lachnospirales	Lachnospiraceae	XBB2008
RGIG8018	China_rumen1509	China rumen	Bacteria	Firmicutes_A	Clostridia	Lachnospirales	UBA1390
RGIG8019	China_rumen1510	China rumen	Bacteria	Firmicutes_A	Clostridia	Lachnospirales	Lachnospiraceae	AC2028
RGIG8020	China_rumen1511	China rumen	Bacteria	Firmicutes_A	Clostridia_A	Christensenellales	CAG-74	Firm-10
RGIG8021	China_rumen1512	China rumen	Bacteria	Bacteroidota	Bacteroidia	Bacteroidales	Bacteroidaceae	Prevotella
RGIG8022	China_rumen1513	China rumen	Bacteria	Firmicutes_A	Clostridia	Lachnospirales	Lachnospiraceae	UBA2868
RGIG8023	China_rumen1514	China rumen	Bacteria	Bacteroidota	Bacteroidia	Bacteroidales	ML635J-15	Bact-19
RGIG8024	China_rumen1515	China rumen	Bacteria	Firmicutes_A	Clostridia	Oscillospirales	Ruminococcaceae	Ruminococcus
RGIG8025	China_rumen1516	China rumen	Bacteria	Firmicutes_A	Clostridia	Peptostreptococcales	Anaerovoracaceae	UBA1764
RGIG8026	China_rumen1517	China rumen	Bacteria	Firmicutes_A	Clostridia	Lachnospirales	Lachnospiraceae	UBA6987
RGIG8027	China_rumen1518	China rumen	Bacteria	Firmicutes_A	Clostridia_A	Christensenellales	CAG-138	PeH17
RGIG8028	China_rumen1519	China rumen	Bacteria	Bacteroidota	Bacteroidia	Bacteroidales	Muribaculaceae	C941
RGIG8029	China_rumen1520	China rumen	Bacteria	Firmicutes_A	Clostridia	Peptostreptococcales	Anaerovoracaceae	UBA1764
RGIG8030	China_rumen1521	China rumen	Bacteria	Firmicutes_A	Clostridia	Oscillospirales	Ruminococcaceae	Ruminococcus_D	Ruminococcus_D albus_B
RGIG8031	China_rumen1522	China rumen	Bacteria	Firmicutes_A	Clostridia	Oscillospirales	CAG-272	UBA1248
RGIG8032	China_rumen1523	China rumen	Bacteria	Firmicutes_A	Clostridia	Lachnospirales	Lachnospiraceae	Eubacterium_Q
RGIG8033	China_rumen1524	China rumen	Bacteria	Firmicutes_A	Clostridia	Oscillospirales	CAG-382	UBA1206	UBA1206 sp002310055
RGIG8034	China_rumen1525	China rumen	Bacteria	Spirochaetota	Spirochaetia	Treponematales	Treponemataceae	Treponema_D
RGIG8035	China_rumen1526	China rumen	Bacteria	Patescibacteria	Saccharimonadia	Saccharimonadales	Saccharimonadaceae	UBA2834
RGIG8036	China_rumen1527	China rumen	Bacteria	Firmicutes	Bacilli	RFN20	CAG-826
RGIG8037	China_rumen1528	China rumen	Bacteria	Firmicutes_A	Clostridia	Oscillospirales	Oscillospiraceae	CAG-83
RGIG8038	China_rumen1529	China rumen	Bacteria	Firmicutes_A	Clostridia_A	Christensenellales	CAG-138	UBA3857
RGIG8039	China_rumen1530	China rumen	Bacteria	Bacteroidota	Bacteroidia	Bacteroidales	Bacteroidaceae	Prevotella
RGIG8040	China_rumen1531	China rumen	Bacteria	Bacteroidota	Bacteroidia	Bacteroidales	UBA932	Bact-11
RGIG8041	China_rumen1532	China rumen	Bacteria	Firmicutes_C	Negativicutes	Selenomonadales	Selenomonadaceae	RUG643
RGIG8042	China_rumen1533	China rumen	Bacteria	Bacteroidota	Bacteroidia	Bacteroidales	UBA932	RC9
RGIG8043	China_rumen1534	China rumen	Bacteria	Firmicutes_A	Clostridia	Lachnospirales	Lachnospiraceae	UBA6987
RGIG8044	China_rumen1535	China rumen	Bacteria	Firmicutes_A	Clostridia	Lachnospirales	Lachnospiraceae	UBA1712-A
RGIG8045	China_rumen1536	China rumen	Bacteria	Bacteroidota	Bacteroidia	Bacteroidales	Bacteroidaceae	UBA4372
RGIG8046	China_rumen1537	China rumen	Bacteria	Firmicutes_A	Clostridia_A	Christensenellales	CAG-74	SFMI01
RGIG8047	China_rumen1538	China rumen	Bacteria	Firmicutes_A	Clostridia	Lachnospirales	Lachnospiraceae
RGIG8048	China_rumen1539	China rumen	Bacteria	Firmicutes_A	Clostridia	Oscillospirales	Oscillospiraceae	RUG678
RGIG8049	China_rumen1540	China rumen	Bacteria	Fibrobacterota	Fibrobacteria	Fibrobacterales	Fibrobacteraceae	Fibrobacter	Fibrobacter sp002210345
RGIG8050	China_rumen1541	China rumen	Bacteria	Firmicutes_A	Clostridia_A	Christensenellales	UBA4651
RGIG8051	China_rumen1542	China rumen	Bacteria	Firmicutes_A	Clostridia	TANB77	CAG-508	CAG-452
RGIG8052	China_rumen1543	China rumen	Bacteria	Firmicutes_A	Clostridia	Lachnospirales	Lachnospiraceae	UBA1258
RGIG8053	China_rumen1544	China rumen	Bacteria	Bacteroidota	Bacteroidia	Bacteroidales	Bacteroidaceae	Prevotella
RGIG8054	China_rumen1545	China rumen	Bacteria	Bacteroidota	Bacteroidia	Bacteroidales	UBA932	RC9	RC9 sp900167925
RGIG8055	China_rumen1546	China rumen	Bacteria	Firmicutes_A	Clostridia	UBA1212	UBA1255	UBA1255
RGIG8056	China_rumen1547	China rumen	Bacteria	Bacteroidota	Bacteroidia	Bacteroidales	Bacteroidaceae	Prevotella
RGIG8057	China_rumen1548	China rumen	Bacteria	Firmicutes_A	Clostridia	Peptostreptococcales	Anaerovoracaceae	UBA1764
RGIG8058	China_rumen1549	China rumen	Bacteria	Patescibacteria	Saccharimonadia	Saccharimonadales	Saccharimonadaceae	UBA2866
RGIG8059	China_rumen1550	China rumen	Bacteria	Bacteroidota	Bacteroidia	Bacteroidales	Muribaculaceae	C941
RGIG8060	China_rumen1551	China rumen	Bacteria	Bacteroidota	Bacteroidia	Bacteroidales	Bacteroidaceae	UBA4372
RGIG8061	China_rumen1552	China rumen	Bacteria	Firmicutes_A	Clostridia	Lachnospirales	Lachnospiraceae	G11
RGIG8062	China_rumen1553	China rumen	Bacteria	Bacteroidota	Bacteroidia	Bacteroidales	Bacteroidaceae	Prevotella
RGIG8063	China_rumen1554	China rumen	Bacteria	Bacteroidota	Bacteroidia	Bacteroidales	Muribaculaceae	C941
RGIG8064	China_rumen1555	China rumen	Bacteria	Firmicutes_A	Clostridia	Lachnospirales	Lachnospiraceae
RGIG8065	China_rumen1556	China rumen	Archaea	Thermoplasmatota	Thermoplasmata	Methanomassiliicoccales	Methanomethylophilaceae	ISO4-G1
RGIG8066	China_rumen1557	China rumen	Bacteria	Bacteroidota	Bacteroidia	Bacteroidales	Paludibacteraceae	UBA1181
RGIG8067	China_rumen1558	China rumen	Bacteria	Verrucomicrobiota	Verrucomicrobiae	Pedosphaerales	UBA1412	UBA1412
RGIG8068	China_rumen1559	China rumen	Bacteria	Firmicutes_A	Clostridia	Lachnospirales	Lachnospiraceae	ISDg
RGIG8069	China_rumen1560	China rumen	Bacteria	Desulfobacterota	Desulfovibrionia
RGIG8070	China_rumen1561	China rumen	Bacteria	Firmicutes_A	Clostridia	Oscillospirales	CAG-382	UBA1206	UBA1206 sp002310055
RGIG8071	China_rumen1562	China rumen	Bacteria	Proteobacteria	Gammaproteobacteria	Burkholderiales	Burkholderiaceae	Oxalobacter
RGIG8072	China_rumen1563	China rumen	Bacteria	Bacteroidota	Bacteroidia	Bacteroidales	Bacteroidaceae	Prevotella
RGIG8073	China_rumen1564	China rumen	Bacteria	Firmicutes_A	Clostridia	Oscillospirales	CAG-272	CAG-390	CAG-390 sp900321265
RGIG8074	China_rumen1565	China rumen	Bacteria	Firmicutes_C	Negativicutes	Selenomonadales	Selenomonadaceae	UBA7018
RGIG8075	China_rumen1566	China rumen	Bacteria	Firmicutes_A	Clostridia	Lachnospirales	Lachnospiraceae	UBA3766
RGIG8076	China_rumen1567	China rumen	Bacteria	Firmicutes_A	Clostridia	Lachnospirales	Lachnospiraceae
RGIG8077	China_rumen1568	China rumen	Bacteria	Bacteroidota	Bacteroidia	Bacteroidales	UBA1715	UBA1715
RGIG8078	China_rumen1569	China rumen	Bacteria	Bacteroidota	Bacteroidia	Bacteroidales	WCHB1-69	UBA1195	UBA1195 sp002309855
RGIG8079	China_rumen1570	China rumen	Bacteria	Bacteroidota	Bacteroidia	Bacteroidales	UBA3824	UBA3824
RGIG8080	China_rumen1571	China rumen	Bacteria	Firmicutes_A	Clostridia	Lachnospirales	Lachnospiraceae	ISDg
RGIG8081	China_rumen1572	China rumen	Bacteria	Bacteroidota	Bacteroidia	Bacteroidales	UBA932	Bact-11
RGIG8082	China_rumen1573	China rumen	Bacteria	Firmicutes_A	Clostridia	Lachnospirales	Lachnospiraceae	UBA3766
RGIG8083	China_rumen1574	China rumen	Bacteria	Firmicutes_A	Clostridia	Lachnospirales	Lachnospiraceae
RGIG8084	China_rumen1575	China rumen	Bacteria	Bacteroidota	Bacteroidia	Bacteroidales	UBA932
RGIG8085	China_rumen1576	China rumen	Bacteria	Firmicutes_A	Clostridia	Oscillospirales	CAG-272
RGIG8086	China_rumen1577	China rumen	Bacteria	Bacteroidota	Bacteroidia	Bacteroidales	UBA932	RC9
RGIG8087	China_rumen1578	China rumen	Archaea	Thermoplasmatota	Thermoplasmata	Methanomassiliicoccales	Methanomethylophilaceae
RGIG8088	China_rumen1579	China rumen	Bacteria	Spirochaetota	Spirochaetia	Treponematales	Treponemataceae	UBA1240
RGIG8089	China_rumen1580	China rumen	Bacteria	Bacteroidota	Bacteroidia	Bacteroidales	UBA3663	UBA3663
RGIG8090	China_rumen1581	China rumen	Bacteria	Bacteroidota	Bacteroidia	Bacteroidales	UBA932	RC9
RGIG8091	China_rumen1582	China rumen	Bacteria	Bacteroidota	Bacteroidia	Bacteroidales	UBA932	RC9
RGIG8092	China_rumen1583	China rumen	Bacteria	Bacteroidota	Bacteroidia	Bacteroidales	P3
RGIG8093	China_rumen1584	China rumen	Bacteria	Bacteroidota	Bacteroidia	Bacteroidales	UBA932	RC9
RGIG8094	China_rumen1585	China rumen	Bacteria	Firmicutes_A	Clostridia	Lachnospirales	Lachnospiraceae	Acetatifactor
RGIG8095	China_rumen1586	China rumen	Bacteria	Firmicutes_A	Clostridia	Saccharofermentanales	Saccharofermentanaceae	Firm-16
RGIG8096	China_rumen1587	China rumen	Bacteria	Proteobacteria	Alphaproteobacteria	Rs-D84	Rs-D84	Rs-D84
RGIG8097	China_rumen1588	China rumen	Bacteria	Bacteroidota	Bacteroidia	Bacteroidales	BM520
RGIG8098	China_rumen1589	China rumen	Bacteria	Bacteroidota	Bacteroidia	Bacteroidales	Bacteroidaceae	UBA6382
RGIG8099	China_rumen1590	China rumen	Bacteria	Bacteroidota	Bacteroidia	Bacteroidales	P3	UBA1219
RGIG8100	China_rumen1591	China rumen	Bacteria	Firmicutes	Bacilli	RFN20	CAG-826	UBA4951
RGIG8101	China_rumen1592	China rumen	Bacteria	Firmicutes_A	Clostridia	Oscillospirales	Acutalibacteraceae	UBA737
RGIG8102	China_rumen1593	China rumen	Bacteria	Firmicutes_A	Clostridia_A	Christensenellales	UBA4651
RGIG8103	China_rumen1594	China rumen	Bacteria	Spirochaetota	Spirochaetia	Treponematales	Treponemataceae	UBA1240	UBA1240 sp002308875
RGIG8104	China_rumen1595	China rumen	Bacteria	Bacteroidota	Bacteroidia	Bacteroidales	WCHB1-69
RGIG8105	China_rumen1596	China rumen	Bacteria	Spirochaetota	Spirochaetia	Treponematales	Treponemataceae	UBA1240
RGIG8106	China_rumen1597	China rumen	Bacteria	Bacteroidota	Bacteroidia	Bacteroidales	Paludibacteraceae	UBA1723
RGIG8107	China_rumen1598	China rumen	Bacteria	Firmicutes_A	Clostridia	Peptostreptococcales	Anaerovoracaceae	UBA3871
RGIG8108	China_rumen1599	China rumen	Bacteria	Bacteroidota	Bacteroidia	Bacteroidales	Muribaculaceae	C941
RGIG8109	China_rumen1600	China rumen	Bacteria	Verrucomicrobiota	Verrucomicrobiae	Pedosphaerales	UBA1412	UBA1412
RGIG8110	China_rumen1601	China rumen	Bacteria	Spirochaetota	Spirochaetia	Sphaerochaetales	Sphaerochaetaceae	UBA9732
RGIG8111	China_rumen1602	China rumen	Bacteria	Bacteroidota	Bacteroidia	Bacteroidales	Bacteroidaceae	UBA1179
RGIG8112	China_rumen1603	China rumen	Bacteria	Fibrobacterota	Fibrobacteria	Fibrobacterales	Fibrobacteraceae	Fibrobacter
RGIG8113	China_rumen1604	China rumen	Bacteria	Elusimicrobiota	Elusimicrobia	Elusimicrobiales	Elusimicrobiaceae
RGIG8114	China_rumen1605	China rumen	Bacteria	UBP6	UBA1177	UBA1177	UBA1177	UBA1177
RGIG8115	China_rumen1606	China rumen	Bacteria	Bacteroidota	Bacteroidia	Bacteroidales	Bacteroidaceae	Prevotella
RGIG8116	China_rumen1607	China rumen	Bacteria	Proteobacteria	Alphaproteobacteria	Rs-D84	Rs-D84	Rs-D84
RGIG8117	China_rumen1608	China rumen	Bacteria	Firmicutes	Bacilli	RFN20	CAG-826
RGIG8118	China_rumen1609	China rumen	Bacteria	Firmicutes_A	Clostridia	Oscillospirales	Acutalibacteraceae	UBA737
RGIG8119	China_rumen1610	China rumen	Bacteria	Firmicutes_A	Clostridia	Lachnospirales	Lachnospiraceae	ISDg
RGIG8120	China_rumen1611	China rumen	Bacteria	Bacteroidota	Bacteroidia	Bacteroidales	UBA932	UBA1232
RGIG8121	China_rumen1612	China rumen	Bacteria	Firmicutes_A	Clostridia	Lachnospirales	Lachnospiraceae	UBA3766
RGIG8122	China_rumen1613	China rumen	Bacteria	UBP6	UBA1177	UBA1177	UBA1177	UBA1177
RGIG8123	China_rumen1614	China rumen	Bacteria	Verrucomicrobiota	Kiritimatiellae	RFP12	UBA1067	UBA1067
RGIG8124	China_rumen1615	China rumen	Bacteria	Firmicutes_A	Clostridia_A	Christensenellales	CAG-917
RGIG8125	China_rumen1616	China rumen	Bacteria	Spirochaetota	Spirochaetia	Treponematales	Treponemataceae
RGIG8126	China_rumen1617	China rumen	Bacteria	Bacteroidota	Bacteroidia	Bacteroidales	Paludibacteraceae	RF16
RGIG8127	China_rumen1618	China rumen	Bacteria	Firmicutes_A	Clostridia	Saccharofermentanales	Saccharofermentanaceae	Firm-16
RGIG8128	China_rumen1619	China rumen	Bacteria	Firmicutes_A	Clostridia	Saccharofermentanales	Saccharofermentanaceae	Saccharofermentans
RGIG8129	China_rumen1620	China rumen	Bacteria	Proteobacteria	Alphaproteobacteria	Rs-D84	Rs-D84	Rs-D84
RGIG8130	China_rumen1621	China rumen	Bacteria	Proteobacteria	Alphaproteobacteria	Rs-D84	Rs-D84	Rs-D84
RGIG8131	China_rumen1622	China rumen	Bacteria	Firmicutes	Bacilli	ML615J-28	CAG-698	CAG-698
RGIG8132	China_rumen1623	China rumen	Bacteria	Elusimicrobiota	Elusimicrobia	Elusimicrobiales	Elusimicrobiaceae	UBA1436
RGIG8133	China_rumen1624	China rumen	Bacteria	Desulfobacterota	Desulfovibrionia	Desulfovibrionales	Desulfovibrionaceae	Desulfovibrio
RGIG8134	China_rumen1625	China rumen	Bacteria	Firmicutes_A	Clostridia	Lachnospirales	Lachnospiraceae	UBA1258
RGIG8135	China_rumen1626	China rumen	Bacteria	Firmicutes_A	Clostridia	Oscillospirales	Oscillospiraceae	UBA1774
RGIG8136	China_rumen1627	China rumen	Bacteria	Bacteroidota	Bacteroidia	Bacteroidales	Bacteroidaceae	UBA4334
RGIG8137	China_rumen1628	China rumen	Bacteria	Firmicutes	Bacilli	RFN20	CAG-826
RGIG8138	China_rumen1629	China rumen	Bacteria	Firmicutes_A	Clostridia	Lachnospirales	Lachnospiraceae	ISDg
RGIG8139	China_rumen1630	China rumen	Bacteria	Bacteroidota	Bacteroidia	Bacteroidales	UBA932	RC9
RGIG8140	China_rumen1631	China rumen	Bacteria	Bacteroidota	Bacteroidia	Bacteroidales	Bacteroidaceae	Prevotella
RGIG8141	China_rumen1632	China rumen	Bacteria	Bacteroidota	Bacteroidia	Bacteroidales	WCHB1-69
RGIG8142	China_rumen1633	China rumen	Bacteria	Firmicutes_A	Clostridia	Lachnospirales	Lachnospiraceae	ISDg
RGIG8143	China_rumen1634	China rumen	Bacteria	Bacteroidota	Bacteroidia	Bacteroidales	UBA932
RGIG8144	China_rumen1635	China rumen	Bacteria	Bacteroidota	Bacteroidia	Bacteroidales	Bacteroidaceae	Prevotella
RGIG8145	China_rumen1636	China rumen	Bacteria	Bacteroidota	Bacteroidia	Bacteroidales	Bacteroidaceae	UBA4372
RGIG8146	China_rumen1637	China rumen	Bacteria	Bacteroidota	Bacteroidia	Bacteroidales	Paludibacteraceae	RF16
RGIG8147	China_rumen1638	China rumen	Bacteria	Bacteroidota	Bacteroidia	Bacteroidales	Bacteroidaceae	UBA4334
RGIG8148	China_rumen1639	China rumen	Bacteria	Firmicutes_A	Clostridia	Lachnospirales	Lachnospiraceae	ISDg
RGIG8149	China_rumen1640	China rumen	Bacteria	Firmicutes_A	Clostridia	Saccharofermentanales	Saccharofermentanaceae	Firm-16
RGIG8150	China_rumen1641	China rumen	Bacteria	Verrucomicrobiota	Lentisphaeria	Victivallales	UBA1829	UBA11452
RGIG8151	China_rumen1642	China rumen	Bacteria	Bacteroidota	Bacteroidia	Bacteroidales	UBA932	RC9
RGIG8152	China_rumen1643	China rumen	Bacteria	Bacteroidota	Bacteroidia	Bacteroidales	UBA932	RC9
RGIG8153	China_rumen1644	China rumen	Bacteria	Bacteroidota	Bacteroidia	Bacteroidales	WCHB1-69	UBA1756
RGIG8154	China_rumen1645	China rumen	Bacteria	Firmicutes	Bacilli	RF39	CAG-1000
RGIG8155	China_rumen1646	China rumen	Bacteria	Firmicutes_A	Clostridia	Lachnospirales	Lachnospiraceae	ISDg
RGIG8156	China_rumen1647	China rumen	Bacteria	Verrucomicrobiota	Lentisphaeria	UBA1407	UBA1407
RGIG8157	China_rumen1648	China rumen	Bacteria	Bacteroidota	Bacteroidia	Bacteroidales	Salinivirgaceae
RGIG8158	China_rumen1649	China rumen	Bacteria	Bacteroidota	Bacteroidia	Bacteroidales	Paludibacteraceae	RF16
RGIG8159	China_rumen1650	China rumen	Bacteria	Bacteroidota	Bacteroidia	Bacteroidales	Bacteroidaceae	UBA4372
RGIG8160	China_rumen1651	China rumen	Bacteria	Bacteroidota	Bacteroidia	Bacteroidales	P3	UBA1711
RGIG8161	China_rumen1652	China rumen	Bacteria	Bacteroidota	Bacteroidia	Bacteroidales	Bacteroidaceae	Ga6A1
RGIG8162	China_rumen1653	China rumen	Bacteria	Firmicutes_A	Clostridia	Saccharofermentanales	Saccharofermentanaceae	Saccharofermentans
RGIG8163	China_rumen1654	China rumen	Bacteria	Proteobacteria	Alphaproteobacteria	RF32	CAG-977
RGIG8164	China_rumen1655	China rumen	Bacteria	Firmicutes	Bacilli	ML615J-28	CAG-698
RGIG8165	China_rumen1656	China rumen	Bacteria	Bacteroidota	Bacteroidia	Bacteroidales	Bacteroidaceae	UBA4372
RGIG8166	China_rumen1657	China rumen	Bacteria	Firmicutes_A	Clostridia	Saccharofermentanales	Saccharofermentanaceae	Saccharofermentans
RGIG8167	China_rumen1658	China rumen	Bacteria	Bacteroidota	Bacteroidia	Bacteroidales	Bacteroidaceae	Prevotella
RGIG8168	China_rumen1659	China rumen	Bacteria	Bacteroidota	Bacteroidia	Bacteroidales	UBA932	RC9
RGIG8169	China_rumen1660	China rumen	Bacteria	Verrucomicrobiota	Lentisphaeria	Victivallales	UBA1829	UBA11452
RGIG8170	China_rumen1661	China rumen	Bacteria	Bacteroidota	Bacteroidia	Bacteroidales	UBA932	RC9
RGIG8171	China_rumen1662	China rumen	Bacteria	Firmicutes_A	Clostridia	Lachnospirales	Lachnospiraceae	AC2028
RGIG8172	China_rumen1663	China rumen	Bacteria	Spirochaetota	Spirochaetia	Treponematales	Treponemataceae	Treponema_D
RGIG8173	China_rumen1664	China rumen	Bacteria	Bacteroidota	Bacteroidia	Bacteroidales	ML635J-15	Bact-19
RGIG8174	China_rumen1665	China rumen	Bacteria	Firmicutes_A	Clostridia	Lachnospirales	Lachnospiraceae	UBA1258
RGIG8175	China_rumen1666	China rumen	Bacteria	Spirochaetota	Spirochaetia	Treponematales	Treponemataceae	Treponema_D
RGIG8176	China_rumen1667	China rumen	Bacteria	Bacteroidota	Bacteroidia	Bacteroidales	UBA932	RC9
RGIG8177	China_rumen1668	China rumen	Bacteria	Proteobacteria	Alphaproteobacteria	Rs-D84	Rs-D84	Rs-D84
RGIG8178	China_rumen1669	China rumen	Bacteria	Firmicutes_A	Clostridia	Lachnospirales	Lachnospiraceae	Eubacterium_Q
RGIG8179	China_rumen1670	China rumen	Bacteria	Bacteroidota	Bacteroidia	Bacteroidales	P3
RGIG8180	China_rumen1671	China rumen	Bacteria	Bacteroidota	Bacteroidia	Bacteroidales	Bacteroidaceae	UBA6382
RGIG8181	China_rumen1672	China rumen	Bacteria	Firmicutes_A	Clostridia_A	Christensenellales	Borkfalkiaceae
RGIG8182	China_rumen1673	China rumen	Bacteria	Bacteroidota	Bacteroidia	Bacteroidales	Bacteroidaceae	UBA1189
RGIG8183	China_rumen1674	China rumen	Bacteria	Firmicutes_A	Clostridia	Oscillospirales
RGIG8184	China_rumen1675	China rumen	Bacteria	Bacteroidota	Bacteroidia	Bacteroidales	P3	UBA1711
RGIG8185	China_rumen1676	China rumen	Bacteria	Proteobacteria	Alphaproteobacteria	Rs-D84	Rs-D84	Rs-D84
RGIG8186	China_rumen1677	China rumen	Bacteria	Bacteroidota	Bacteroidia	Bacteroidales	UBA932	RC9
RGIG8187	China_rumen1678	China rumen	Bacteria	Bacteroidota	Bacteroidia	Bacteroidales	WCHB1-69	UBA1205
RGIG8188	China_rumen1679	China rumen	Bacteria	Firmicutes_A	Clostridia_A	Christensenellales	Borkfalkiaceae	UBA4636
RGIG8189	China_rumen1680	China rumen	Bacteria	Firmicutes_A	Clostridia	Saccharofermentanales	Saccharofermentanaceae	Saccharofermentans
RGIG8190	China_rumen1681	China rumen	Bacteria	Bacteroidota	Bacteroidia	Bacteroidales	F082	F082
RGIG8191	China_rumen1682	China rumen	Bacteria	Firmicutes_A	Clostridia_A	Christensenellales	UMGS1908	UMGS2070
RGIG8192	China_rumen1683	China rumen	Bacteria	Bacteroidota	Bacteroidia	Bacteroidales	F082	F082
RGIG8193	China_rumen1684	China rumen	Bacteria	Bacteroidota	Bacteroidia	Bacteroidales	Paludibacteraceae	RF16
RGIG8194	China_rumen1685	China rumen	Bacteria	Proteobacteria	Gammaproteobacteria	Burkholderiales	Neisseriaceae	QFNR01
RGIG8195	China_rumen1686	China rumen	Bacteria	Bacteroidota	Bacteroidia	Bacteroidales	UBA932	Bact-11
RGIG8196	China_rumen1687	China rumen	Bacteria	Bacteroidota	Bacteroidia	Bacteroidales	UBA932	RC9
RGIG8197	China_rumen1688	China rumen	Archaea	Thermoplasmatota	Thermoplasmata	Methanomassiliicoccales	Methanomethylophilaceae	ISO4-G1
RGIG8198	China_rumen1689	China rumen	Bacteria	Bacteroidota	Bacteroidia	Bacteroidales	Bacteroidaceae	UBA1179
RGIG8199	China_rumen1690	China rumen	Bacteria	Firmicutes_A	Clostridia	Oscillospirales	Ruminococcaceae	Firm-04
RGIG8200	China_rumen1691	China rumen	Bacteria	UBA3054	UBA3054	UBA3054	UBA3054	UBA3054
RGIG8201	China_rumen1692	China rumen	Bacteria	Firmicutes_A	Clostridia	Lachnospirales	Lachnospiraceae
RGIG8202	China_rumen1693	China rumen	Bacteria	Firmicutes_A	Clostridia_A	Christensenellales	CAG-917	CAG-475
RGIG8203	China_rumen1694	China rumen	Bacteria	Firmicutes_A	Clostridia_A	Christensenellales	CAG-138	UBA3857
RGIG8204	China_rumen1695	China rumen	Bacteria	Bacteroidota	Bacteroidia	Bacteroidales	UBA932
RGIG8205	China_rumen1696	China rumen	Bacteria	Bacteroidota	Bacteroidia	Bacteroidales	Bacteroidaceae	UBA1786
RGIG8206	China_rumen1697	China rumen	Archaea	Thermoplasmatota	Thermoplasmata	Methanomassiliicoccales	Methanomethylophilaceae	MX-02
RGIG8207	China_rumen1698	China rumen	Bacteria	Elusimicrobiota	Elusimicrobia	Elusimicrobiales	UBA9959
RGIG8208	China_rumen1699	China rumen	Bacteria	Armatimonadota	UBA5829	UBA5829
RGIG8209	China_rumen1700	China rumen	Bacteria	Spirochaetota	Spirochaetia	Treponematales	Treponemataceae	Treponema_D
RGIG8210	China_rumen1701	China rumen	Bacteria	Bacteroidota	Bacteroidia	Bacteroidales	WCHB1-69	UBA1205
RGIG8211	China_rumen1702	China rumen	Bacteria	Bacteroidota	Bacteroidia	Bacteroidales	UBA932	Bact-11
RGIG8212	China_rumen1703	China rumen	Bacteria	Verrucomicrobiota	Verrucomicrobiae	Pedosphaerales	UBA1412	UBA1412
RGIG8213	China_rumen1704	China rumen	Bacteria	Bacteroidota	Bacteroidia	Bacteroidales	Bacteroidaceae	UBA4372
RGIG8214	China_rumen1705	China rumen	Bacteria	Firmicutes_A	Clostridia_A	Christensenellales	DTU072	CAG-1782
RGIG8215	China_rumen1706	China rumen	Bacteria	Firmicutes	Bacilli	RFN20	CAG-826	UBA733
RGIG8217	China_rumen1708	China rumen	Bacteria	Firmicutes_A	Clostridia_A	Christensenellales	CAG-1252
RGIG8218	China_rumen1709	China rumen	Bacteria	Spirochaetota	Spirochaetia	Treponematales	Treponemataceae	Treponema_D
RGIG8219	China_rumen1710	China rumen	Bacteria	Bacteroidota	Bacteroidia	Bacteroidales	Paludibacteraceae	UBA1181
RGIG8220	China_rumen1711	China rumen	Bacteria	Bacteroidota	Bacteroidia	Bacteroidales	UBA932	RC9
RGIG8221	China_rumen1712	China rumen	Archaea	Halobacteriota	Methanomicrobia	Methanomicrobiales	Methanomicrobiaceae	Methanomicrobium
RGIG8222	China_rumen1713	China rumen	#N/A	Others	Others	Others	Others	Others	Others
RGIG8223	China_rumen1714	China rumen	Bacteria	Bacteroidota	Bacteroidia	Bacteroidales	Paludibacteraceae	RF16
RGIG8224	China_rumen1715	China rumen	Bacteria	Firmicutes_A	Clostridia	Oscillospirales	Ruminococcaceae	Ruminococcus
RGIG8225	China_rumen1716	China rumen	Bacteria	Proteobacteria	Alphaproteobacteria	RF32	CAG-977
RGIG8226	China_rumen1717	China rumen	Bacteria	Firmicutes_A	Clostridia_A	Christensenellales	Borkfalkiaceae	UBA1259
RGIG8227	China_rumen1718	China rumen	Bacteria	Verrucomicrobiota	Lentisphaeria	UBA1407	UBA1407	UBA1407
RGIG8228	China_rumen1719	China rumen	Bacteria	Firmicutes_A	Clostridia	Lachnospirales	Lachnospiraceae
RGIG8229	China_rumen1720	China rumen	Bacteria	Firmicutes_A	Clostridia	Lachnospirales	Lachnospiraceae	Acetatifactor
RGIG8230	China_rumen1721	China rumen	Bacteria	Verrucomicrobiota	Lentisphaeria	UBA1407	UBA1407
RGIG8231	China_rumen1722	China rumen	Bacteria	Firmicutes_A	Clostridia	Oscillospirales	CAG-382	UBA1206
RGIG8232	China_rumen1723	China rumen	Bacteria	Firmicutes_A	Clostridia	Lachnospirales	Lachnospiraceae
RGIG8233	China_rumen1724	China rumen	Bacteria	Spirochaetota	Spirochaetia	Treponematales	Treponemataceae
RGIG8234	China_rumen1725	China rumen	Archaea	Thermoplasmatota	Thermoplasmata	Methanomassiliicoccales	Methanomethylophilaceae	Methanomethylophilus
RGIG8235	China_rumen1726	China rumen	Bacteria	Bacteroidota	Bacteroidia	Bacteroidales	Bacteroidaceae	UBA1179
RGIG8236	China_rumen1727	China rumen	Bacteria	Firmicutes_A	Clostridia	Lachnospirales	Lachnospiraceae
RGIG8237	China_rumen1728	China rumen	Bacteria	Bacteroidota	Bacteroidia	Bacteroidales	WCHB1-69	F23-D06
RGIG8238	China_rumen1729	China rumen	Bacteria	Firmicutes_A	Clostridia	Oscillospirales	Ruminococcaceae	Ruminococcus
RGIG8239	China_rumen1730	China rumen	Bacteria	Firmicutes_A	Clostridia	Saccharofermentanales	Saccharofermentanaceae	Firm-16
RGIG8240	China_rumen1731	China rumen	Bacteria	Bacteroidota	Bacteroidia	Bacteroidales	WCHB1-69
RGIG8241	China_rumen1732	China rumen	Bacteria	Firmicutes_A	Clostridia	Lachnospirales	Lachnospiraceae	ISDg
RGIG8242	China_rumen1733	China rumen	Bacteria	Bacteroidota	Bacteroidia	Bacteroidales	Bacteroidaceae	Prevotella
RGIG8243	China_rumen1734	China rumen	Bacteria	Bacteroidota	Bacteroidia	Bacteroidales	Bacteroidaceae	UBA6382
RGIG8244	China_rumen1735	China rumen	Bacteria	Verrucomicrobiota	Lentisphaeria	Victivallales	UBA1829
RGIG8245	China_rumen1736	China rumen	Bacteria	Proteobacteria	Alphaproteobacteria	Rs-D84	Rs-D84	Rs-D84
RGIG8246	China_rumen1737	China rumen	Bacteria	Bacteroidota	Bacteroidia	Bacteroidales	WCHB1-69	F23-D06
RGIG8247	China_rumen1738	China rumen	Bacteria	Bacteroidota	Bacteroidia	Bacteroidales	Bacteroidaceae	Prevotella
RGIG8248	China_rumen1739	China rumen	Bacteria	Firmicutes_A	Clostridia	Oscillospirales	Ruminococcaceae
RGIG8249	China_rumen1740	China rumen	Bacteria	Bacteroidota	Bacteroidia	Bacteroidales	UBA932	RC9
RGIG8250	China_rumen1741	China rumen	Bacteria	Firmicutes_A	Clostridia_A	Christensenellales	CAG-1252	CAG-1252
RGIG8251	China_rumen1742	China rumen	Bacteria	Firmicutes_A	Clostridia	Lachnospirales	Lachnospiraceae	UBA1201
RGIG8252	China_rumen1743	China rumen	Bacteria	Firmicutes_A	Clostridia	Saccharofermentanales	Saccharofermentanaceae
RGIG8253	China_rumen1744	China rumen	Bacteria	Firmicutes_A	Clostridia_A	Christensenellales	CAG-1252	CAG-1252
RGIG8254	China_rumen1745	China rumen	Bacteria	Firmicutes_A	Clostridia	Oscillospirales	Ruminococcaceae	Firm-04
RGIG8255	China_rumen1746	China rumen	Bacteria	Firmicutes_A	Clostridia_A	Christensenellales	CAG-74	GCA-900199385
RGIG8256	China_rumen1747	China rumen	Bacteria	Bacteroidota	Bacteroidia	Bacteroidales	UBA932	RC9
RGIG8257	China_rumen1748	China rumen	Bacteria	Firmicutes_A	Clostridia	Oscillospirales	Acutalibacteraceae	UBA737
RGIG8258	China_rumen1749	China rumen	Bacteria	Bacteroidota	Bacteroidia	Bacteroidales	UBA932	RC9
RGIG8259	China_rumen1750	China rumen	Bacteria	Bacteroidota	Bacteroidia	Bacteroidales	UBA932	RC9
RGIG8260	China_rumen1751	China rumen	Bacteria	Firmicutes_A	Clostridia	Lachnospirales	Lachnospiraceae	XBB1006
RGIG8261	China_rumen1752	China rumen	Bacteria	Firmicutes_A	Clostridia	Saccharofermentanales	Saccharofermentanaceae	Saccharofermentans
RGIG8262	China_rumen1753	China rumen	Bacteria	Bacteroidota	Bacteroidia	Bacteroidales	Bacteroidaceae	Prevotella
RGIG8263	China_rumen1754	China rumen	Bacteria	Bacteroidota	Bacteroidia	Bacteroidales	Paludibacteraceae	RF16
RGIG8264	China_rumen1755	China rumen	Bacteria	Bacteroidota	Bacteroidia	Bacteroidales	Bacteroidaceae	UBA1786
RGIG8265	China_rumen1756	China rumen	Bacteria	Firmicutes_A	Clostridia	Oscillospirales	CAG-382	UBA1752
RGIG8266	China_rumen1757	China rumen	Bacteria	Bacteroidota	Bacteroidia	Bacteroidales	UBA932	RC9
RGIG8267	China_rumen1758	China rumen	Bacteria	Firmicutes_A	Clostridia	Lachnospirales	Lachnospiraceae	Butyrivibrio
RGIG8268	China_rumen1759	China rumen	Bacteria	Firmicutes_A	Clostridia	Oscillospirales	Acutalibacteraceae	UBA1227
RGIG8269	China_rumen1760	China rumen	Bacteria	Verrucomicrobiota	Kiritimatiellae	RFP12	UBA1067	UBA1067
RGIG8270	China_rumen1761	China rumen	Bacteria	Firmicutes_A	Clostridia	Saccharofermentanales	Saccharofermentanaceae	Saccharofermentans
RGIG8271	China_rumen1762	China rumen	Bacteria	Bacteroidota	Bacteroidia	Bacteroidales	Bacteroidaceae	UBA1189
RGIG8272	China_rumen1763	China rumen	Bacteria	UBP6	UBA1177	UBA1177	UBA1177	UBA1177
RGIG8273	China_rumen1764	China rumen	Bacteria	Bacteroidota	Bacteroidia	Bacteroidales	UBA932	RC9
RGIG8274	China_rumen1765	China rumen	Bacteria	Bacteroidota	Bacteroidia	Bacteroidales	Bacteroidaceae	UBA1179	UBA1179 sp900319225
RGIG8275	China_rumen1766	China rumen	Bacteria	Fibrobacterota	Fibrobacteria	Fibrobacterales	Fibrobacteraceae	Fibrobacter
RGIG8276	China_rumen1767	China rumen	Bacteria	Spirochaetota	Spirochaetia	Treponematales	Treponemataceae	UBA1240
RGIG8277	China_rumen1768	China rumen	Bacteria	Bacteroidota	Bacteroidia	Bacteroidales	UBA932	RC9
RGIG8278	China_rumen1769	China rumen	Bacteria	Bacteroidota	Bacteroidia	Bacteroidales	Bacteroidaceae	UBA4334
RGIG8279	China_rumen1770	China rumen	Bacteria	Firmicutes_A	Clostridia	Oscillospirales	CAG-272
RGIG8280	China_rumen1771	China rumen	Bacteria	Firmicutes_A	Clostridia	Oscillospirales	Acutalibacteraceae	UBA737
RGIG8281	China_rumen1772	China rumen	Bacteria	Firmicutes_A	Clostridia	Saccharofermentanales	Saccharofermentanaceae	Saccharofermentans
RGIG8282	China_rumen1773	China rumen	Bacteria	Bacteroidota	Bacteroidia	Bacteroidales	UBA932	RC9
RGIG8283	China_rumen1774	China rumen	Bacteria	Firmicutes_A	Clostridia	Lachnospirales	Lachnospiraceae
RGIG8284	China_rumen1775	China rumen	Bacteria	Spirochaetota	Spirochaetia	Sphaerochaetales	Sphaerochaetaceae	UBA9732
RGIG8285	China_rumen1776	China rumen	Bacteria	Firmicutes_A	Clostridia	Oscillospirales	CAG-272	UBA1248
RGIG8286	China_rumen1777	China rumen	Bacteria	Firmicutes_A	Clostridia	Oscillospirales	Oscillospiraceae	CAG-110
RGIG8287	China_rumen1778	China rumen	Bacteria	Bacteroidota	Bacteroidia	Bacteroidales	UBA932
RGIG9260	China_rumen1951	China rumen	Bacteria	Spirochaetota	Spirochaetia	Treponematales	Treponemataceae	Treponema_D
RGIG9261	China_rumen1952	China rumen	Bacteria	Firmicutes_C	Negativicutes	Selenomonadales	Selenomonadaceae	UBA3796
RGIG9262	China_rumen1953	China rumen	Bacteria	Bacteroidota	Bacteroidia	Flavobacteriales	Weeksellaceae	Chryseobacterium
RGIG9263	China_rumen1954	China rumen	Bacteria	Cyanobacteria	Vampirovibrionia	Gastranaerophilales	Gastranaerophilaceae	UBA2813
RGIG9264	China_rumen1955	China rumen	Bacteria	Verrucomicrobiota	Kiritimatiellae	RFP12	UBA1067	UBA1067	UBA1067 sp002371755
RGIG9266	China_rumen1957	China rumen	Bacteria	Bacteroidota	Bacteroidia	Bacteroidales	UBA932	RC9
RGIG9265	China_rumen1956	China rumen	Bacteria	Desulfobacterota	Desulfovibrionia	Desulfovibrionales	Desulfovibrionaceae	Desulfovibrio
RGIG9267	China_rumen1958	China rumen	Bacteria	Firmicutes_A	Clostridia	Lachnospirales	UBA1390
RGIG9268	China_rumen1959	China rumen	Bacteria	Firmicutes_A	Clostridia	Lachnospirales	Lachnospiraceae	UBA3305
RGIG9269	China_rumen1960	China rumen	Bacteria	Firmicutes_A	Clostridia	Lachnospirales	Lachnospiraceae	Eubacterium_Q
RGIG9270	China_rumen1961	China rumen	Bacteria	Bacteroidota	Bacteroidia	Bacteroidales	UBA932	RC9
RGIG9271	China_rumen1962	China rumen	Bacteria	Firmicutes_A	Clostridia	Lachnospirales	Lachnospiraceae	Eubacterium_Q
RGIG9272	China_rumen1963	China rumen	Bacteria	Proteobacteria	Gammaproteobacteria	Pseudomonadales	Moraxellaceae	Acinetobacter	Acinetobacter bohemicus
RGIG9273	China_rumen1964	China rumen	Bacteria	Firmicutes_A	Clostridia	Oscillospirales	Acutalibacteraceae	RUG420	RUG420 sp900317085
RGIG9274	China_rumen1965	China rumen	Bacteria	Firmicutes_A	Clostridia	Lachnospirales	Lachnospiraceae
RGIG9275	China_rumen1966	China rumen	Bacteria	Firmicutes_A	Clostridia	Lachnospirales	Lachnospiraceae	Clostridium_R
RGIG9277	China_rumen1968	China rumen	Bacteria	Firmicutes	Bacilli	RF39	CAG-433	CAG-433
RGIG9278	China_rumen1969	China rumen	Bacteria	Firmicutes_A	Clostridia	Lachnospirales	Lachnospiraceae	NK4A144
RGIG9279	China_rumen1970	China rumen	Bacteria	Bacteroidota	Bacteroidia	Bacteroidales	Bacteroidaceae	Prevotella
RGIG9280	China_rumen1971	China rumen	Bacteria	Firmicutes_A	Clostridia	Oscillospirales	Ruminococcaceae	Ruminococcus_D
RGIG9281	China_rumen1972	China rumen	Bacteria	Firmicutes_A	Clostridia	Lachnospirales	Lachnospiraceae	NK4A144
RGIG9283	China_rumen1974	China rumen	Bacteria	Firmicutes_A	Clostridia	Lachnospirales	Lachnospiraceae	NK4A144
RGIG9282	China_rumen1973	China rumen	Bacteria	Firmicutes_A	Clostridia	Lachnospirales	Lachnospiraceae	UBA3633	UBA3633 sp002374095
RGIG9284	China_rumen1975	China rumen	Bacteria	Firmicutes_A	Clostridia	Lachnospirales	Lachnospiraceae	Lachnospira	Lachnospira sp000437735
RGIG9286	China_rumen1977	China rumen	Bacteria	Fibrobacterota	Fibrobacteria	Fibrobacterales	Fibrobacteraceae	Fibrobacter	Fibrobacter sp900143055
RGIG9287	China_rumen1978	China rumen	Bacteria	Firmicutes_A	Clostridia	Oscillospirales	Acutalibacteraceae
RGIG9288	China_rumen1979	China rumen	Bacteria	Firmicutes_A	Clostridia	Lachnospirales	Lachnospiraceae	NK4A144
RGIG9289	China_rumen1980	China rumen	Bacteria	Bacteroidota	Bacteroidia	Bacteroidales	Bacteroidaceae	UBA4372	UBA4372 sp002494215
RGIG9290	China_rumen1981	China rumen	Bacteria	Spirochaetota	Spirochaetia	Treponematales	Treponemataceae	Treponema_D
RGIG9292	China_rumen1983	China rumen	Bacteria	Firmicutes_A	Clostridia	Lachnospirales	Lachnospiraceae	UBA3633
RGIG9293	China_rumen1984	China rumen	Archaea	Methanobacteriota	Methanobacteria	Methanobacteriales	Methanobacteriaceae	Methanobrevibacter_A
RGIG9294	China_rumen1985	China rumen	Bacteria	Firmicutes_A	Clostridia	Lachnospirales	Lachnospiraceae	Pseudobutyrivibrio
RGIG9295	China_rumen1986	China rumen	Bacteria	Bacteroidota	Bacteroidia	Bacteroidales	P3	Phil12
RGIG9296	China_rumen1987	China rumen	Bacteria	Verrucomicrobiota	Kiritimatiellae	RFP12	UBA1067	UBA1067
RGIG9297	China_rumen1988	China rumen	Bacteria	Firmicutes_A	Clostridia	Lachnospirales	Lachnospiraceae	CAG-127
RGIG9298	China_rumen1989	China rumen	Bacteria	Firmicutes_A	Clostridia	Lachnospirales	Lachnospiraceae
RGIG9299	China_rumen1990	China rumen	Bacteria	Firmicutes_A	Clostridia	Lachnospirales	Lachnospiraceae	NK4A144
RGIG9300	China_rumen1991	China rumen	Bacteria	Firmicutes_A	Clostridia	Lachnospirales	Lachnospiraceae	Eubacterium_F
RGIG9301	China_rumen1992	China rumen	Archaea	Methanobacteriota	Methanobacteria	Methanobacteriales	Methanobacteriaceae	Methanobrevibacter_A
RGIG9201	China_rumen1892	China rumen	Bacteria	Firmicutes_C	Negativicutes	Selenomonadales	Selenomonadaceae	UBA7018
RGIG9202	China_rumen1893	China rumen	Bacteria	Synergistota	Synergistia	Synergistales	Dethiosulfovibrionaceae
RGIG9203	China_rumen1894	China rumen	Bacteria	Firmicutes_A	Clostridia	Lachnospirales	Lachnospiraceae	Pseudobutyrivibrio
RGIG9204	China_rumen1895	China rumen	Bacteria	Proteobacteria	Gammaproteobacteria	Pseudomonadales	Pseudomonadaceae	Pseudomonas_E	Pseudomonas_E fragi_B
RGIG9205	China_rumen1896	China rumen	Bacteria	Firmicutes_C	Negativicutes	Acidaminococcales	Acidaminococcaceae	Succiniclasticum	Succiniclasticum sp900315345
RGIG9206	China_rumen1897	China rumen	Bacteria	Proteobacteria	Alphaproteobacteria	RF32	CAG-239	RUG410
RGIG9207	China_rumen1898	China rumen	Bacteria	Firmicutes_A	Clostridia	Lachnospirales	Lachnospiraceae	Clostridium_R
RGIG9208	China_rumen1899	China rumen	Bacteria	Firmicutes	Bacilli	RFN20	CAG-826	UBA733
RGIG9209	China_rumen1900	China rumen	Bacteria	Firmicutes_A	Clostridia	Lachnospirales	Lachnospiraceae	NK4A136
RGIG9210	China_rumen1901	China rumen	Bacteria	Bacteroidota	Bacteroidia	Bacteroidales	Bacteroidaceae	Prevotella	Prevotella sp900315545
RGIG9211	China_rumen1902	China rumen	Bacteria	Bacteroidota	Bacteroidia	Bacteroidales	Paludibacteraceae	RF16
RGIG9212	China_rumen1903	China rumen	Bacteria	Firmicutes_A	Clostridia	Oscillospirales	Ruminococcaceae	Ruminiclostridium_E
RGIG9213	China_rumen1904	China rumen	Bacteria	Firmicutes_A	Clostridia	Lachnospirales	Lachnospiraceae	Oribacterium
RGIG9214	China_rumen1905	China rumen	Bacteria	Bacteroidota	Bacteroidia	Bacteroidales	Bacteroidaceae	Prevotella
RGIG9215	China_rumen1906	China rumen	Bacteria	Firmicutes_A	Clostridia	Oscillospirales	Ruminococcaceae	CAG-353	CAG-353 sp002395525
RGIG9216	China_rumen1907	China rumen	Bacteria	Firmicutes	Bacilli	RFN20	CAG-826	UBA2450
RGIG9217	China_rumen1908	China rumen	Bacteria	Proteobacteria	Alphaproteobacteria	RF32	CAG-239	RUG410
RGIG9219	China_rumen1910	China rumen	Bacteria	Firmicutes_C	Negativicutes	Selenomonadales	Selenomonadaceae	Selenomonas_B
RGIG9220	China_rumen1911	China rumen	Archaea	Methanobacteriota	Methanobacteria	Methanobacteriales	Methanobacteriaceae	Methanobrevibacter_A
RGIG9221	China_rumen1912	China rumen	Bacteria	Firmicutes_C	Negativicutes	Selenomonadales	Selenomonadaceae	RUG643
RGIG9222	China_rumen1913	China rumen	Bacteria	Firmicutes_A	Clostridia_A	Christensenellales	Borkfalkiaceae
RGIG9223	China_rumen1914	China rumen	Bacteria	Firmicutes	Bacilli	RFN20	CAG-826
RGIG9224	China_rumen1915	China rumen	Bacteria	Proteobacteria	Gammaproteobacteria	Enterobacterales	Succinivibrionaceae	Succinivibrio
RGIG9225	China_rumen1916	China rumen	Bacteria	Firmicutes_A	Clostridia	Lachnospirales	Lachnospiraceae	NK4A136
RGIG9227	China_rumen1918	China rumen	Bacteria	Bacteroidota	Bacteroidia	Bacteroidales	UBA932	RC9
RGIG9228	China_rumen1919	China rumen	Bacteria	Bacteroidota	Bacteroidia	Bacteroidales	Muribaculaceae	C941	C941 sp900318865
RGIG9229	China_rumen1920	China rumen	Bacteria	Firmicutes_C	Negativicutes	Selenomonadales	Selenomonadaceae	Anaerovibrio	Anaerovibrio lipolyticus
RGIG9230	China_rumen1921	China rumen	Bacteria	Firmicutes_A	Clostridia	TANB77	CAG-508	CAG-269
RGIG9231	China_rumen1922	China rumen	Bacteria	Bacteroidota	Bacteroidia	Bacteroidales	Bacteroidaceae	UBA2918
RGIG9232	China_rumen1923	China rumen	Bacteria	Firmicutes_A	Clostridia	Lachnospirales	Lachnospiraceae	Butyrivibrio
RGIG9233	China_rumen1924	China rumen	Bacteria	Firmicutes_C	Negativicutes	Selenomonadales	Selenomonadaceae	RUG643
RGIG9234	China_rumen1925	China rumen	Bacteria	Bacteroidota	Bacteroidia	Bacteroidales	UBA932	RC9
RGIG9235	China_rumen1926	China rumen	Bacteria	Bacteroidota	Bacteroidia	Bacteroidales	Bacteroidaceae	Prevotella	Prevotella sp002353585
RGIG9236	China_rumen1927	China rumen	Bacteria	Firmicutes_A	Clostridia	TANB77	CAG-508	CAG-269
RGIG9237	China_rumen1928	China rumen	Bacteria	Bacteroidota	Bacteroidia	Bacteroidales	UBA932	RC9
RGIG9238	China_rumen1929	China rumen	Bacteria	Firmicutes_A	Clostridia	Oscillospirales	Ruminococcaceae	Ruminiclostridium_E
RGIG9239	China_rumen1930	China rumen	Bacteria	Bacteroidota	Bacteroidia	Bacteroidales	UBA932	UBA1232
RGIG9240	China_rumen1931	China rumen	Bacteria	Proteobacteria	Gammaproteobacteria	Enterobacterales	Shewanellaceae	Shewanella	Shewanella baltica
RGIG9241	China_rumen1932	China rumen	Bacteria	Proteobacteria	Gammaproteobacteria	Pseudomonadales	Moraxellaceae	Psychrobacter	Psychrobacter alimentarius
RGIG9242	China_rumen1933	China rumen	Bacteria	Bacteroidota	Bacteroidia	Bacteroidales	Bacteroidaceae	Prevotella
RGIG9243	China_rumen1934	China rumen	Bacteria	Firmicutes_A	Clostridia	Lachnospirales	Lachnospiraceae	XBD2001
RGIG9244	China_rumen1935	China rumen	Bacteria	Firmicutes_C	Negativicutes	Selenomonadales	Selenomonadaceae	RUG643
RGIG9245	China_rumen1936	China rumen	Bacteria	Bacteroidota	Bacteroidia	Flavobacteriales	Weeksellaceae	Algoriella	Algoriella xinjiangensis
RGIG9246	China_rumen1937	China rumen	Bacteria	Spirochaetota	Spirochaetia	Treponematales	Treponemataceae	Treponema_D	Treponema_D sp002368605
RGIG9247	China_rumen1938	China rumen	Bacteria	Firmicutes_A	Clostridia	Lachnospirales	Lachnospiraceae	NK4A136
RGIG9248	China_rumen1939	China rumen	Bacteria	Firmicutes	Bacilli	RF39	CAG-433
RGIG9249	China_rumen1940	China rumen	Bacteria	Firmicutes_C	Negativicutes	Selenomonadales	Selenomonadaceae	Selenomonas_A
RGIG9250	China_rumen1941	China rumen	Bacteria	Firmicutes_A	Clostridia	Saccharofermentanales	Saccharofermentanaceae	Saccharofermentans	Saccharofermentans sp900314745
RGIG9251	China_rumen1942	China rumen	Bacteria	Proteobacteria	Gammaproteobacteria	Pseudomonadales	Moraxellaceae	Psychrobacter	Psychrobacter sp001652315
RGIG9252	China_rumen1943	China rumen	Bacteria	Bacteroidota	Bacteroidia	Bacteroidales	Bacteroidaceae	Alloprevotella	Alloprevotella sp900317635
RGIG9253	China_rumen1944	China rumen	Bacteria	Firmicutes_A	Clostridia	Lachnospirales	Lachnospiraceae	Butyrivibrio
RGIG9254	China_rumen1945	China rumen	Bacteria	Bacteroidota	Bacteroidia	Bacteroidales	Bacteroidaceae	Prevotella
RGIG9255	China_rumen1946	China rumen	Bacteria	Bacteroidota	Bacteroidia	Flavobacteriales	Weeksellaceae	Epilithonimonas	Epilithonimonas sp001643375
RGIG9256	China_rumen1947	China rumen	Bacteria	Bacteroidota	Bacteroidia	Bacteroidales	Bacteroidaceae	Prevotella
RGIG9258	China_rumen1949	China rumen	Bacteria	Firmicutes_C	Negativicutes	Acidaminococcales	Acidaminococcaceae	Succiniclasticum	Succiniclasticum sp900315345
RGIG9259	China_rumen1950	China rumen	Bacteria	Bacteroidota	Bacteroidia	Bacteroidales	UBA932	RC9
RGIG10261	China_rumen2210	China rumen	Bacteria	Verrucomicrobiota	Kiritimatiellae	RFP12	UBA1067	UBA1211
RGIG10262	China_rumen2211	China rumen	Bacteria	Bacteroidota	Bacteroidia	Bacteroidales	Paludibacteraceae	RUG163
RGIG10263	China_rumen2212	China rumen	Bacteria	Bacteroidota	Bacteroidia	Bacteroidales	Muribaculaceae
RGIG10264	China_rumen2213	China rumen	Bacteria	Actinobacteriota	Coriobacteriia	Coriobacteriales	Eggerthellaceae
RGIG10265	China_rumen2214	China rumen	Bacteria	Firmicutes_A	Clostridia_A	Christensenellales	Borkfalkiaceae
RGIG10269	China_rumen2218	China rumen	Bacteria	Firmicutes_A	Clostridia	Lachnospirales	Lachnospiraceae
RGIG10266	China_rumen2215	China rumen	Bacteria	Firmicutes_A	Clostridia	UBA1212	UBA1212	UBA1212
RGIG10267	China_rumen2216	China rumen	Bacteria	Firmicutes_A	Clostridia	Oscillospirales	Acutalibacteraceae	UMGS1487
RGIG10268	China_rumen2217	China rumen	Bacteria	Bacteroidota	Bacteroidia	Bacteroidales	Paludibacteraceae	UBA4363
RGIG10270	China_rumen2219	China rumen	Bacteria	Firmicutes	Bacilli	RFN20	CAG-826	UBA1719
RGIG10271	China_rumen2220	China rumen	Bacteria	Bacteroidota	Bacteroidia	Bacteroidales	UBA932
RGIG10272	China_rumen2221	China rumen	Bacteria	Verrucomicrobiota	Lentisphaeria	UBA1407	UBA1407
RGIG10274	China_rumen2223	China rumen	Bacteria	Bacteroidota	Bacteroidia	Bacteroidales	Paludibacteraceae	RF16
RGIG10275	China_rumen2224	China rumen	Bacteria	Firmicutes_A	Clostridia	Lachnospirales	Lachnospiraceae	G11
RGIG10276	China_rumen2225	China rumen	Bacteria	Firmicutes_A	Clostridia	Lachnospirales	Lachnospiraceae	UBA3305
RGIG10277	China_rumen2226	China rumen	Bacteria	Bdellovibrionota	Bacteriovoracia	Bacteriovoracales	Bacteriovoracaceae
RGIG10278	China_rumen2227	China rumen	Bacteria	Firmicutes_A	Clostridia	Oscillospirales	CAG-382_A
RGIG10279	China_rumen2228	China rumen	Bacteria	Firmicutes_A	Clostridia	Oscillospirales	CAG-272	CAG-448
RGIG10280	China_rumen2229	China rumen	Bacteria	Firmicutes_A	Clostridia	Lachnospirales	Lachnospiraceae	UBA1267
RGIG10281	China_rumen2230	China rumen	Bacteria	Elusimicrobiota	Elusimicrobia	Elusimicrobiales	UBA9959
RGIG10282	China_rumen2231	China rumen	Bacteria	Verrucomicrobiota	Kiritimatiellae	RFP12	UBA1067	UBA1067
RGIG10283	China_rumen2232	China rumen	Bacteria	Spirochaetota	Spirochaetia	Treponematales	Treponemataceae	Treponema_D	Treponema_D sp002394465
RGIG10284	China_rumen2233	China rumen	Bacteria	Armatimonadota	UBA5829	UBA5829	UBA5829
RGIG10285	China_rumen2234	China rumen	Bacteria	Firmicutes	Bacilli	Erysipelotrichales	Erysipelotrichaceae	UBA636
RGIG10290	China_rumen2239	China rumen	Bacteria	Firmicutes_A	Clostridia	Oscillospirales	CAG-272	CAG-390
RGIG10287	China_rumen2236	China rumen	Bacteria	Firmicutes_A	Clostridia	Lachnospirales	Lachnospiraceae	Acetatifactor
RGIG10288	China_rumen2237	China rumen	Bacteria	Bacteroidota	Bacteroidia	Bacteroidales	Bacteroidaceae	Prevotella
RGIG10289	China_rumen2238	China rumen	Bacteria	Firmicutes_A	Clostridia	Lachnospirales	Lachnospiraceae	XBD2001
RGIG10291	China_rumen2240	China rumen	Bacteria	Firmicutes_A	Clostridia	Oscillospirales	Acutalibacteraceae	RUG420
RGIG10293	China_rumen2242	China rumen	Bacteria	Firmicutes_A	Clostridia	Oscillospirales	Ruminococcaceae	Firm-04
RGIG10292	China_rumen2241	China rumen	Bacteria	Firmicutes_A	Clostridia	Oscillospirales	Ruminococcaceae	Ruminococcus_D	Ruminococcus_D albus_A
RGIG10294	China_rumen2243	China rumen	Bacteria	Firmicutes_A	Clostridia	Lachnospirales	Lachnospiraceae	Acetatifactor
RGIG10296	China_rumen2245	China rumen	Bacteria	Bacteroidota	Bacteroidia	Bacteroidales	Paludibacteraceae	RUG163
RGIG10297	China_rumen2246	China rumen	Bacteria	Firmicutes_A	Clostridia	Oscillospirales	CAG-272
RGIG10298	China_rumen2247	China rumen	Bacteria	Bacteroidota	Bacteroidia	Bacteroidales	Bacteroidaceae	Prevotella
RGIG10299	China_rumen2248	China rumen	Bacteria	Firmicutes_A	Clostridia	Saccharofermentanales	Saccharofermentanaceae	Saccharofermentans
RGIG10300	China_rumen2249	China rumen	Bacteria	Firmicutes_A	Clostridia	Lachnospirales	Lachnospiraceae	UBA1267
RGIG10301	China_rumen2250	China rumen	Bacteria	Firmicutes_A	Clostridia	UBA1212	UBA1212
RGIG10302	China_rumen2251	China rumen	Bacteria	Spirochaetota	Spirochaetia	Treponematales	Treponemataceae	Treponema_D
RGIG10303	China_rumen2252	China rumen	Bacteria	Firmicutes_A	Clostridia	Oscillospirales	Ruminococcaceae
RGIG10304	China_rumen2253	China rumen	Bacteria	Firmicutes_A	Clostridia	Lachnospirales	Lachnospiraceae	AC2028
RGIG10305	China_rumen2254	China rumen	Bacteria	Firmicutes_A	Clostridia_A	Christensenellales	Borkfalkiaceae
RGIG10306	China_rumen2255	China rumen	Bacteria	Firmicutes_A	Clostridia	Lachnospirales	Lachnospiraceae
RGIG10307	China_rumen2256	China rumen	Bacteria	Fibrobacterota	Fibrobacteria	Fibrobacterales	Fibrobacteraceae	Fibrobacter_A
RGIG10308	China_rumen2257	China rumen	Bacteria	Firmicutes_A	Clostridia	Oscillospirales	CAG-382	UMGS882
RGIG10309	China_rumen2258	China rumen	Bacteria	Bacteroidota	Bacteroidia	Bacteroidales	P3	UBA1219
RGIG10310	China_rumen2259	China rumen	Bacteria	Firmicutes_A	Clostridia	Oscillospirales	Oscillospiraceae	UBA1777
RGIG10311	China_rumen2260	China rumen	Bacteria	Proteobacteria	Gammaproteobacteria	Enterobacterales	Succinivibrionaceae	Succinivibrio
RGIG10312	China_rumen2261	China rumen	Bacteria	Firmicutes_A	Clostridia	Oscillospirales	CAG-382	UBA1206	UBA1206 sp002310055
RGIG10313	China_rumen2262	China rumen	Bacteria	Bacteroidota	Bacteroidia	Bacteroidales	UBA932	RC9	RC9 sp900167925
RGIG10314	China_rumen2263	China rumen	Bacteria	Firmicutes_A	Clostridia	Oscillospirales	CAG-272
RGIG10315	China_rumen2264	China rumen	Bacteria	Firmicutes_A	Clostridia	Lachnospirales	Lachnospiraceae	Acetatifactor
RGIG10316	China_rumen2265	China rumen	Bacteria	Firmicutes_A	Clostridia	Oscillospirales	CAG-382	UBA1752
RGIG10317	China_rumen2266	China rumen	Bacteria	Planctomycetota	SZUA-567	SZUA-567	SZUA-567
RGIG10318	China_rumen2267	China rumen	Bacteria	Bacteroidota	Bacteroidia	Bacteroidales	UBA932	UBA1232
RGIG10319	China_rumen2268	China rumen	Bacteria	Verrucomicrobiota	Kiritimatiellae	RFP12	UBA1067	UBA1211	UBA1211 sp002309585
RGIG10320	China_rumen2269	China rumen	Bacteria	Bacteroidota	Bacteroidia	Bacteroidales	UBA932	RC9
RGIG10321	China_rumen2270	China rumen	Bacteria	Firmicutes_A	Clostridia	Lachnospirales	Lachnospiraceae	UBA1267
RGIG10322	China_rumen2271	China rumen	Bacteria	Firmicutes	Bacilli	RFN20	CAG-826	UBA733
RGIG10323	China_rumen2272	China rumen	Bacteria	Proteobacteria	Alphaproteobacteria	RF32	CAG-239	RUG410
RGIG10324	China_rumen2273	China rumen	Bacteria	Bacteroidota	Bacteroidia	Bacteroidales	Bacteroidaceae	Ga6A1	Ga6A1 sp900102385
RGIG10325	China_rumen2274	China rumen	Bacteria	Synergistota	Synergistia	Synergistales	Dethiosulfovibrionaceae	Pyramidobacter
RGIG10326	China_rumen2275	China rumen	Bacteria	Firmicutes_A	Clostridia	Oscillospirales	CAG-272	UBA1740
RGIG10327	China_rumen2276	China rumen	Bacteria	Firmicutes_A	Clostridia	Oscillospirales	Ruminococcaceae	Firm-04
RGIG10329	China_rumen2278	China rumen	Archaea	Thermoplasmatota	Thermoplasmata	Methanomassiliicoccales	Methanomethylophilaceae
[truncated: 5,652 more rows]

## Sheet: gene annotation
Genome ID	Acetoacetyl-CoA reductase	Butyryl-CoA dehydrogenase	Crotonoyl-CoA reductase	Lactate dehydrogenase	Malate dehydrogenase	Glutamate synthase			Succinate dehydrogenase		Bifurcating hydrogenases		Fermentative hydrogenases			Sensory hydrogenases			Energy-converting hydrogenases										Methanogenic hydrogenases						Respiratory hydrogenases						Hydrogenase-associated diaphorases	Methanogenesis			Reductive acetogenesis				Nitrate reduction
	PaaH	ACADS	FabV	LDH	Mdh	GdhA	GltB	GltD	FrdA	SdhA	FeFeA3	FeFeA4	FeFeB	FeFeA1	FeFeA2	FeFeC1	FeFeC2	FeFeC3	NiFe1a	NiFe1h	NiFe3b	NiFe3d	NiFe4a	NiFe4c	NiFe4d	NiFe4e	NiFe4f	NiFe4g	Fe	NiFe3a	NiFe3c	NiFe4h	NiFe4i	NiFe1k	NiFe1b	NiFe1c	NiFe1d	NiFe1f	NiFe1i	NiFe2d	HydB	Mtd	Mer	McrA	CooS	CodH	FdhA	AcsB	NapA
China_rumen1	0	0	1	0	0	1	0	2	0	0	0	0	0	0	0	0	0	0	0	0	0	0	0	0	0	0	0	0	0	0	0	0	0	0	0	0	0	0	0	0	0	0	0	0	0	0	0	0	0
China_rumen10	0	0	0	0	0	1	0	1	0	0	0	0	0	0	0	0	0	0	0	0	0	0	0	0	0	0	0	0	0	0	0	0	0	0	0	0	0	0	0	0	1	0	0	0	0	0	0	0	0
China_rumen100	0	0	0	1	0	2	0	2	0	0	0	0	0	0	0	0	0	0	0	0	0	0	0	0	0	0	0	0	0	0	0	0	0	0	0	0	0	0	0	0	1	0	0	0	0	0	0	0	0
China_rumen1000	1	1	0	0	0	1	1	2	0	0	1	0	1	0	0	0	0	0	0	0	0	0	0	0	0	0	0	0	0	0	0	0	0	0	0	0	0	0	0	0	1	0	0	0	0	0	1	0	0
China_rumen1001	0	0	0	0	0	1	0	0	1	0	1	0	0	0	0	0	0	0	0	0	0	0	0	0	0	0	0	0	0	0	0	0	0	0	0	0	0	0	0	0	1	0	0	0	0	0	0	0	0
China_rumen1002	0	0	0	0	0	0	1	2	0	0	0	0	0	0	0	1	0	0	0	0	0	0	0	0	0	0	0	0	0	0	0	0	0	0	0	0	0	0	0	0	0	0	0	0	0	0	0	0	0
China_rumen1003	0	0	0	0	0	0	0	0	1	0	0	0	0	0	0	0	0	0	0	0	0	0	0	0	0	0	0	0	0	0	0	0	0	0	0	0	0	0	0	0	0	0	0	0	0	0	0	0	0
China_rumen1004	0	1	0	0	0	1	0	1	0	0	1	0	0	0	0	0	0	0	0	0	0	0	0	0	0	0	0	0	0	0	0	0	0	0	0	0	0	0	0	0	1	0	0	0	0	0	0	0	0
China_rumen1005	0	0	0	0	0	1	0	1	0	0	0	0	0	0	0	0	0	0	0	0	0	0	0	0	0	0	0	0	0	0	0	0	0	0	0	0	0	0	0	0	1	0	0	0	0	0	0	0	0
China_rumen1006	0	0	0	0	0	0	0	2	1	0	0	0	0	0	0	0	0	0	0	0	0	0	0	0	0	0	0	0	0	0	0	0	0	0	0	0	0	0	0	0	0	0	0	0	0	0	0	0	0
China_rumen1007	0	0	0	0	0	0	0	1	0	0	0	0	0	0	0	0	0	0	0	0	0	0	0	0	0	0	0	0	0	0	0	0	0	0	0	0	0	0	0	0	0	0	0	0	0	0	0	0	0
China_rumen1008	0	0	0	0	0	1	0	1	0	0	1	0	1	0	0	0	0	0	0	0	0	0	0	0	0	0	0	0	0	0	0	0	0	0	0	0	0	0	0	0	1	0	0	0	0	0	0	0	0
China_rumen1009	0	0	1	0	0	0	0	1	0	0	0	0	0	0	0	0	1	0	0	0	0	0	0	0	0	0	0	0	0	0	0	0	0	0	0	0	0	0	0	0	0	0	0	0	0	0	0	0	0
China_rumen101	0	0	0	0	0	2	0	1	1	0	0	0	0	0	0	0	0	0	0	0	0	0	0	0	0	0	0	0	0	0	0	0	0	0	0	0	0	0	0	0	0	0	0	0	0	0	0	0	0
China_rumen1010	0	0	0	0	0	0	0	1	0	0	1	0	0	0	0	0	0	0	0	0	0	0	0	0	0	0	0	0	0	0	0	0	0	0	0	0	0	0	0	0	0	0	0	0	0	0	0	0	0
China_rumen1011	0	0	0	0	0	1	1	2	0	0	0	0	0	0	1	0	0	0	0	0	0	0	0	0	0	0	0	0	0	0	0	0	0	0	0	0	0	0	0	0	0	0	0	0	0	0	1	0	0
China_rumen1012	0	0	1	0	1	1	0	1	0	2	0	0	0	0	0	0	0	0	0	0	0	0	0	0	0	0	0	0	0	0	0	0	0	0	0	0	0	0	0	0	1	0	0	0	0	0	0	0	0
China_rumen1013	0	0	0	0	0	0	0	1	0	0	1	0	0	0	0	0	0	0	0	0	0	0	0	0	0	0	0	0	0	0	0	0	0	0	0	0	0	0	0	0	1	0	0	0	0	0	0	0	0
China_rumen1014	0	0	0	1	0	0	0	0	0	0	0	0	0	0	0	0	0	0	0	0	0	0	0	0	0	0	0	0	0	0	0	0	0	0	0	0	0	0	0	0	0	0	0	0	0	0	0	0	0
China_rumen1015	0	0	0	0	0	0	0	1	0	0	0	0	0	0	0	0	0	0	0	0	0	0	0	0	0	0	0	0	0	0	0	0	0	0	0	0	0	0	0	0	0	0	0	0	0	0	0	0	0
China_rumen1016	0	0	0	0	1	1	1	2	1	0	0	0	0	0	0	0	0	0	0	0	0	0	0	0	0	0	0	0	0	0	0	0	0	0	0	0	0	0	0	0	0	0	0	0	0	0	0	0	0
China_rumen1017	0	0	0	1	0	1	1	2	0	0	1	0	0	0	0	0	1	0	0	0	0	0	0	0	0	0	0	0	0	0	0	0	0	0	0	0	0	0	0	0	1	0	0	0	0	0	0	0	0
China_rumen1018	0	0	0	1	0	1	0	1	0	0	1	0	0	0	0	0	0	0	0	0	0	0	0	0	0	0	0	0	0	0	0	0	0	0	0	0	0	0	0	0	2	0	0	0	0	0	0	0	0
China_rumen102	0	0	0	0	0	1	0	0	0	0	1	0	0	0	0	0	0	0	0	0	0	0	0	0	0	0	0	1	0	0	0	0	0	0	0	0	0	0	0	0	1	0	0	0	0	0	0	0	0
China_rumen1020	0	0	0	0	0	0	0	0	0	0	0	0	0	0	0	0	0	0	0	0	0	0	0	0	0	0	0	0	0	0	0	0	0	0	0	0	0	0	0	0	0	0	0	0	0	0	0	0	0
China_rumen1021	1	1	0	0	0	1	0	1	0	0	1	0	0	0	0	0	0	0	0	0	0	0	0	0	0	0	0	0	0	0	0	0	0	0	0	0	0	0	0	0	1	0	0	0	0	0	0	0	0
China_rumen1022	0	0	0	0	0	1	0	1	0	0	1	0	1	0	0	1	0	1	0	0	0	0	0	0	0	0	0	0	0	0	0	0	0	0	0	0	0	0	0	0	1	0	0	0	0	0	0	0	0
China_rumen1023	0	1	0	0	0	1	1	2	0	0	0	0	1	0	0	0	1	0	0	0	0	0	0	0	0	0	0	0	0	0	0	0	0	0	0	0	0	0	0	0	0	0	0	0	0	0	0	0	0
China_rumen1024	0	0	0	0	0	1	1	2	0	0	0	0	0	0	0	0	0	0	0	0	0	0	0	0	0	0	0	0	0	0	0	0	0	0	0	0	0	0	0	0	0	0	0	0	0	0	0	0	0
China_rumen1025	0	0	0	0	0	2	0	1	2	0	0	0	0	0	0	0	0	0	0	0	0	0	0	0	0	0	0	0	0	0	0	0	0	0	0	0	0	0	0	0	0	0	0	0	0	0	0	0	0
China_rumen1026	0	0	0	1	0	0	0	0	0	0	0	0	0	0	0	0	0	0	0	0	0	0	0	0	0	0	0	0	0	0	0	0	0	0	0	0	0	0	0	0	0	0	0	0	0	0	0	0	0
China_rumen1027	0	0	1	1	0	1	0	0	0	0	0	0	1	0	0	0	0	0	0	0	0	0	0	0	0	0	0	0	0	0	0	0	0	0	0	0	0	0	0	0	0	0	0	0	0	0	0	0	0
China_rumen1028	0	0	0	0	0	1	0	1	1	0	0	0	0	0	0	0	0	0	0	0	0	0	0	0	0	0	0	0	0	0	0	0	0	0	0	0	0	0	0	0	0	0	0	0	0	0	0	0	0
China_rumen1029	1	1	0	0	0	1	0	1	0	0	1	0	0	0	0	0	0	0	0	0	0	0	0	0	0	0	0	0	0	0	0	0	0	0	0	0	0	0	0	0	1	0	0	0	0	0	0	0	0
China_rumen1031	1	1	0	1	0	1	1	2	0	0	1	0	1	0	0	0	0	0	0	0	0	0	0	0	0	0	0	0	0	0	0	0	0	0	0	0	0	0	0	0	1	0	0	0	0	0	2	0	0
China_rumen1032	0	1	0	0	0	0	0	1	0	0	1	0	0	0	0	0	0	0	0	0	0	0	0	0	0	0	0	0	0	0	0	0	0	0	0	0	0	0	0	0	1	0	0	0	0	0	0	0	0
China_rumen1033	0	0	0	0	0	1	0	1	1	0	0	0	0	0	0	0	0	0	0	0	0	0	0	0	0	0	0	0	0	0	0	0	0	0	0	0	0	0	0	0	0	0	0	0	0	0	0	0	0
China_rumen1034	0	0	0	0	0	1	0	0	0	0	1	0	0	0	0	0	0	0	0	0	0	0	0	0	0	0	0	0	0	0	0	0	0	0	0	0	0	0	0	0	1	0	0	0	0	0	0	0	0
China_rumen1035	0	0	0	0	0	1	0	1	0	0	0	0	0	0	0	0	0	0	0	0	0	0	0	0	0	0	0	0	0	0	0	0	0	0	0	0	0	0	0	0	1	0	0	0	0	0	0	0	0
China_rumen1036	0	0	0	0	0	2	0	1	1	0	0	0	0	0	0	0	0	0	0	0	0	0	0	0	0	0	0	0	0	0	0	0	0	0	0	0	0	0	0	0	0	0	0	0	0	0	0	0	0
China_rumen1037	0	0	0	0	0	1	0	1	1	0	0	0	0	0	0	0	0	0	0	0	0	0	0	0	0	0	0	0	0	0	0	0	0	0	0	0	0	0	0	0	0	0	0	0	0	0	0	0	0
China_rumen1038	0	0	0	0	0	1	0	1	0	0	1	0	0	0	0	0	0	1	0	0	0	0	0	0	0	0	0	0	0	0	0	0	0	0	0	0	0	0	0	0	1	0	0	0	0	0	0	0	0
China_rumen1039	0	0	0	0	0	0	0	1	0	0	0	0	0	0	1	0	1	0	0	0	0	0	0	0	0	1	0	0	0	0	0	0	0	0	0	0	0	0	0	0	0	0	0	0	0	0	0	0	0
China_rumen104	0	0	0	0	0	0	0	0	0	0	1	0	1	0	0	0	0	0	0	0	0	0	0	0	0	0	0	0	0	0	0	0	0	0	0	0	0	0	0	0	1	0	0	0	0	0	0	0	0
China_rumen1040	0	0	0	0	0	1	0	1	0	0	1	0	0	0	0	0	0	0	0	0	0	0	0	0	0	0	0	0	0	0	0	0	0	0	0	0	0	0	0	0	1	0	0	0	0	0	0	0	0
China_rumen1041	0	0	0	0	0	1	0	1	1	0	0	0	0	0	0	0	0	0	0	0	0	0	0	0	0	0	0	0	0	0	0	0	0	0	0	0	0	0	0	0	0	0	0	0	0	0	0	0	0
China_rumen1042	0	0	0	0	0	1	0	0	0	0	0	0	0	0	0	0	0	0	0	0	0	0	0	0	0	0	0	0	0	0	0	0	0	0	0	0	0	0	0	0	2	0	0	0	0	0	0	0	0
China_rumen1043	0	0	0	0	0	2	1	2	1	0	0	0	0	0	0	0	0	0	0	0	0	0	0	0	0	0	0	0	0	0	0	0	0	0	0	0	0	0	0	0	0	0	0	0	0	0	0	0	0
China_rumen1044	0	0	0	0	1	0	0	0	0	1	0	0	0	0	0	0	0	0	0	0	0	0	0	0	0	0	0	0	0	0	0	0	0	0	0	0	1	0	0	0	0	0	0	0	0	0	0	0	0
China_rumen1045	1	0	0	0	0	1	0	1	0	0	1	0	1	0	0	0	0	0	0	0	0	0	0	0	0	0	0	0	0	0	0	0	0	0	0	0	0	0	0	0	1	0	0	0	0	0	0	0	0
China_rumen1046	1	0	0	1	0	0	1	1	0	0	0	0	0	0	0	0	0	0	0	0	0	0	0	0	0	1	0	0	0	0	0	0	0	0	0	0	0	0	0	0	0	0	0	0	0	0	0	0	0
China_rumen1047	0	0	0	0	0	1	0	1	0	0	1	0	0	0	0	0	0	0	0	0	0	0	0	0	0	0	0	0	0	0	0	0	0	0	0	0	0	0	0	0	1	0	0	0	0	0	0	0	0
China_rumen1048	0	0	0	0	0	0	0	1	0	0	0	0	0	0	0	0	0	0	0	0	0	0	0	0	0	0	0	0	0	0	0	0	0	0	0	0	0	0	0	0	0	0	0	0	0	0	0	0	0
China_rumen1049	0	0	0	1	0	1	0	2	0	0	0	0	1	0	0	0	0	0	0	0	0	0	0	0	0	1	0	0	0	0	0	0	0	0	0	0	0	0	0	0	0	0	0	0	1	1	0	0	0
China_rumen105	0	0	0	0	1	0	1	0	2	0	0	0	0	0	0	0	0	0	0	0	0	0	0	0	0	0	0	0	0	0	0	0	0	0	0	0	0	0	0	0	0	0	0	0	0	0	0	0	0
China_rumen1050	0	0	0	0	0	1	1	2	0	0	1	0	0	0	0	0	1	0	0	0	0	0	0	0	0	0	0	0	0	0	0	0	0	0	0	0	0	0	0	0	1	0	0	0	0	0	0	0	0
China_rumen1051	1	1	0	0	0	2	0	1	0	0	0	0	0	0	0	0	0	0	0	0	0	0	0	0	0	0	0	0	0	0	0	0	0	0	0	0	0	0	0	0	0	0	0	0	0	0	0	0	0
China_rumen1052	0	0	0	0	0	0	0	2	1	0	0	0	0	0	0	0	0	0	0	0	0	0	0	0	0	0	0	0	0	0	0	0	0	0	0	0	0	0	0	0	0	0	0	0	0	0	0	0	0
China_rumen1053	0	0	0	0	0	1	0	1	0	0	1	0	0	0	0	0	0	0	0	0	0	0	0	0	0	0	0	1	0	0	0	0	0	0	0	0	0	0	0	0	1	0	0	0	0	0	0	0	0
China_rumen1054	0	1	0	1	0	0	1	2	0	0	0	0	1	0	0	0	0	0	0	0	0	0	0	0	0	1	0	0	0	0	0	0	0	0	0	0	0	0	0	0	0	0	0	0	1	1	0	0	0
China_rumen1055	0	0	0	0	0	2	1	0	0	0	0	0	0	0	0	0	0	0	0	0	0	0	0	0	0	0	0	0	0	0	0	0	0	0	0	0	0	0	0	0	0	0	0	0	0	0	0	0	0
China_rumen1056	0	0	0	0	0	1	1	1	1	0	0	0	0	0	0	0	0	0	0	0	0	0	0	0	0	0	0	0	0	0	0	0	0	0	0	0	0	0	0	0	0	0	0	0	0	0	0	0	0
China_rumen1058	0	0	0	0	0	3	1	1	0	0	0	0	0	0	0	0	0	0	0	0	0	0	0	0	0	0	0	0	0	0	0	0	0	0	0	0	0	0	0	0	0	0	0	0	0	0	0	0	0
China_rumen1059	1	1	0	0	1	1	0	1	0	0	1	0	0	0	0	0	0	0	0	0	0	0	0	0	0	0	0	0	0	0	0	0	0	0	0	0	0	0	0	0	1	0	0	0	0	0	0	0	0
China_rumen106	0	0	0	0	0	2	0	0	0	0	0	0	0	0	0	1	0	0	0	0	0	0	0	0	0	0	0	0	0	0	0	0	0	0	0	0	0	0	0	0	0	0	0	0	0	0	0	0	0
China_rumen1060	0	0	0	0	1	1	1	2	1	0	0	0	0	0	0	0	0	0	0	0	0	0	0	0	0	0	0	0	0	0	0	0	0	0	0	0	0	0	0	0	0	0	0	0	0	0	0	0	0
China_rumen1061	0	0	0	0	0	0	0	1	0	0	0	0	0	0	1	0	0	0	0	0	0	0	0	0	0	0	0	0	0	0	0	0	0	0	0	0	0	0	0	0	0	0	0	0	1	1	1	1	0
China_rumen1062	0	0	0	0	0	0	0	1	0	0	0	0	0	0	0	0	0	0	0	0	0	0	0	0	0	0	0	0	0	0	0	0	0	0	0	0	0	0	0	0	1	0	0	0	0	0	0	0	0
China_rumen1063	0	0	0	0	0	1	1	1	0	0	1	0	0	0	0	0	0	0	0	0	0	0	0	0	0	0	0	0	0	0	0	0	0	0	0	0	0	0	0	0	2	0	0	0	0	0	0	0	0
China_rumen1064	0	0	0	1	1	1	0	0	0	1	1	0	0	0	0	0	0	0	0	0	0	0	0	0	0	0	0	0	0	0	0	0	0	0	0	0	1	0	0	0	1	0	0	0	0	0	0	0	1
China_rumen1065	0	0	0	0	0	1	0	0	0	0	1	0	0	0	0	0	0	0	0	0	0	0	0	0	0	0	0	0	0	0	0	0	0	0	0	0	0	0	0	0	2	0	0	0	0	0	0	0	0
China_rumen1067	0	0	0	0	0	2	0	0	0	0	1	0	0	0	0	0	0	0	0	0	0	0	0	0	0	0	0	0	0	0	0	0	0	0	0	0	0	0	0	0	1	0	0	0	0	0	0	0	0
China_rumen1068	1	1	0	0	0	1	0	1	0	0	1	0	0	0	0	0	0	0	0	0	0	0	0	0	0	0	0	0	0	0	0	0	0	0	0	0	0	0	0	0	2	0	0	0	0	0	0	0	0
China_rumen1069	0	0	0	0	1	1	1	2	0	1	0	0	0	0	0	0	0	0	0	0	0	0	0	0	0	0	0	0	0	0	0	0	0	0	0	0	0	0	0	0	0	0	0	0	0	0	0	0	0
China_rumen107	0	0	0	0	1	0	0	0	1	0	0	0	0	0	1	0	0	0	0	0	0	0	0	0	0	0	0	0	0	0	0	0	0	0	0	0	0	0	0	0	0	0	0	0	0	0	0	0	0
China_rumen1070	0	0	0	0	0	1	1	1	0	0	1	0	0	0	0	0	0	0	0	0	0	0	0	0	0	0	0	0	0	0	0	0	0	0	0	0	0	0	0	0	1	0	0	0	0	0	0	0	0
China_rumen1071	0	0	0	0	0	2	0	0	1	0	1	0	0	0	0	0	0	0	0	0	0	0	0	0	0	0	0	0	0	0	0	0	0	0	0	0	0	0	0	0	2	0	0	0	0	0	0	0	0
China_rumen1072	0	0	0	0	1	3	0	2	0	1	0	0	0	0	0	0	0	0	0	0	0	0	0	0	0	0	0	0	0	0	0	0	0	0	0	0	0	0	0	0	0	0	0	0	0	0	0	0	0
China_rumen1073	0	0	1	0	0	0	0	0	1	0	0	0	0	0	0	0	0	0	0	0	0	0	0	0	0	0	0	0	0	0	0	0	0	0	0	0	0	0	0	0	0	0	0	0	0	0	0	0	0
China_rumen1074	0	0	0	0	0	1	0	0	0	0	0	0	0	0	0	0	0	0	0	0	0	0	0	0	0	0	0	0	0	0	1	0	0	0	0	0	0	0	0	0	0	0	0	2	0	0	0	0	0
China_rumen1075	0	0	0	1	0	0	0	0	0	0	0	0	0	0	0	0	0	0	0	0	0	0	0	0	0	0	0	0	0	0	0	0	0	0	0	0	0	0	0	0	0	0	0	0	0	0	0	0	0
China_rumen1076	0	0	0	1	0	1	0	1	0	0	1	0	0	0	0	0	0	0	0	0	0	0	0	0	0	0	0	0	0	0	0	0	0	0	0	0	0	0	0	0	1	0	0	0	0	0	0	0	0
China_rumen1077	0	0	0	0	0	0	0	1	0	0	0	0	0	0	0	0	0	0	0	0	0	0	0	0	0	0	0	0	0	0	0	0	0	0	0	0	0	0	0	0	0	0	0	0	0	0	0	0	0
China_rumen1078	0	0	0	0	1	1	1	2	1	0	0	0	0	0	0	0	0	0	0	0	0	0	0	0	0	0	0	0	0	0	0	0	0	0	0	0	0	0	0	0	0	0	0	0	0	0	0	0	0
China_rumen1079	0	0	0	0	0	1	0	1	0	0	2	0	0	0	0	0	0	0	0	0	0	0	0	0	0	0	0	0	0	0	0	0	0	0	0	0	0	0	0	0	3	0	0	0	0	0	0	0	0
China_rumen108	0	0	0	0	0	1	0	1	3	0	0	0	0	0	0	0	0	0	0	0	0	0	0	0	0	0	0	0	0	0	0	0	0	0	0	0	0	0	0	0	0	0	0	0	0	0	0	0	0
China_rumen1080	0	0	0	0	0	2	0	1	0	0	1	0	0	0	0	1	0	0	0	0	0	0	0	0	0	0	0	0	0	0	0	0	0	0	0	0	0	0	0	0	1	0	0	0	0	0	0	0	0
China_rumen1081	0	0	0	0	0	1	0	1	0	1	0	0	0	0	0	0	0	0	0	0	0	0	0	0	0	0	0	0	0	0	0	0	0	0	0	0	0	0	0	0	0	0	0	0	0	0	0	0	0
China_rumen1082	0	0	0	0	0	1	1	0	0	0	1	0	1	0	0	0	0	0	0	0	0	0	0	0	0	0	0	0	0	0	0	0	0	0	0	0	0	0	0	0	1	0	0	0	0	0	0	0	0
China_rumen1084	0	0	0	1	0	1	1	2	0	0	0	0	1	0	1	0	0	0	0	0	0	0	0	0	0	0	0	0	0	0	0	0	0	0	0	0	0	0	0	0	0	0	0	0	0	0	1	0	0
China_rumen1085	0	0	0	0	0	1	1	1	1	0	0	0	0	0	0	0	0	0	0	0	0	0	0	0	0	0	0	0	0	0	0	0	0	0	0	0	0	0	0	0	0	0	0	0	0	0	0	0	0
China_rumen1086	0	0	0	0	0	1	0	2	0	0	0	0	0	0	0	0	0	0	0	0	0	0	0	0	0	0	0	0	0	0	0	0	0	0	0	0	0	0	0	0	0	0	0	0	0	0	0	0	0
China_rumen1087	0	0	0	0	0	1	0	0	0	0	1	0	0	0	0	0	0	0	0	0	0	0	0	0	0	0	0	0	0	0	0	0	0	0	0	0	0	0	0	0	1	0	0	0	0	0	1	0	0
China_rumen1088	0	0	0	0	0	1	0	0	0	0	0	0	0	0	0	0	0	0	0	0	0	0	0	0	0	0	0	0	0	0	1	0	0	0	0	0	0	0	0	0	0	0	0	2	0	0	0	0	0
China_rumen1089	0	0	0	0	0	1	0	0	0	0	1	0	1	0	0	0	0	0	0	0	0	0	0	0	0	0	0	0	0	0	0	0	0	0	0	0	0	0	0	0	1	0	0	0	0	0	0	0	0
China_rumen109	0	0	0	0	0	2	0	0	1	0	0	0	0	0	0	0	0	0	0	0	0	0	0	0	0	0	0	0	0	0	0	0	0	0	0	0	0	0	0	0	0	0	0	0	0	0	0	0	0
China_rumen1090	0	0	0	0	0	1	0	0	0	0	0	0	0	0	0	0	0	0	0	0	0	0	0	0	0	0	0	0	0	0	1	0	0	0	0	0	0	0	0	0	0	0	0	2	0	0	0	0	0
China_rumen1091	1	0	0	0	0	1	0	0	1	0	0	0	0	0	0	0	0	0	0	0	0	0	0	0	0	0	0	0	0	0	0	0	0	0	0	0	0	0	0	0	0	0	0	0	0	0	0	0	0
China_rumen1092	0	0	0	0	0	1	0	1	0	0	1	0	1	0	0	1	0	1	0	0	0	0	0	0	0	0	0	0	0	0	0	0	0	0	0	0	0	0	0	0	1	0	0	0	0	0	0	0	0
China_rumen1093	0	0	0	0	0	1	0	1	0	0	1	0	0	0	0	0	0	0	0	0	0	0	0	0	0	0	0	0	0	0	0	0	0	0	0	0	0	0	0	0	1	0	0	0	0	0	0	0	0
China_rumen1095	0	0	0	2	0	0	0	2	0	0	1	0	0	0	0	0	2	0	0	0	0	0	0	0	0	0	0	0	0	0	0	0	0	0	0	0	0	0	0	0	1	0	0	0	0	0	0	0	0
China_rumen1096	1	1	0	0	0	1	0	2	0	0	1	0	0	0	0	0	0	1	0	0	0	0	0	0	0	0	0	0	0	0	0	0	0	0	0	0	0	0	0	0	2	0	0	0	0	0	0	0	0
China_rumen1097	0	0	0	0	0	1	0	1	0	0	0	0	0	0	0	0	0	0	0	0	0	0	0	0	0	0	0	0	0	0	0	0	0	0	0	0	0	0	0	0	0	0	0	0	0	0	0	0	0
China_rumen1098	0	0	0	0	0	0	0	0	0	0	1	0	0	0	0	0	0	0	0	0	0	0	0	0	0	0	0	0	0	0	0	0	0	0	0	0	0	0	0	0	1	0	0	0	0	0	0	0	0
China_rumen1099	0	0	0	0	0	1	0	1	0	0	0	0	0	0	0	0	0	0	0	0	0	0	0	0	0	1	0	0	0	0	0	0	0	0	0	0	0	0	0	0	0	0	0	0	0	0	0	0	0
China_rumen11	0	0	0	0	0	1	0	1	0	0	1	0	1	0	0	0	0	0	0	0	0	0	0	0	0	0	0	0	0	0	0	0	0	0	0	0	0	0	0	0	1	0	0	0	0	0	0	0	0
China_rumen110	0	0	0	1	0	0	0	1	0	0	0	0	0	0	0	0	0	0	0	0	0	0	0	0	0	0	0	0	0	0	0	0	0	0	0	0	0	0	0	0	0	0	0	0	0	0	0	0	0
China_rumen1100	0	0	0	0	0	1	1	2	1	0	0	0	0	0	0	0	0	0	0	0	0	0	0	0	0	0	0	0	0	0	0	0	0	0	0	0	0	0	0	0	0	0	0	0	0	0	0	0	0
China_rumen1101	0	1	0	0	0	1	0	0	0	0	0	0	1	0	0	0	1	0	0	0	0	0	0	0	0	0	0	0	0	0	0	0	0	0	0	0	0	0	0	0	0	0	0	0	0	0	1	0	0
China_rumen1102	0	0	0	1	0	1	0	1	0	0	1	0	0	0	0	0	0	0	0	0	0	0	0	0	0	0	0	0	0	0	0	0	0	0	0	0	0	0	0	0	1	0	0	0	0	0	0	0	0
China_rumen1103	0	0	0	0	0	2	0	1	1	0	0	0	0	0	0	0	0	0	0	0	0	0	0	0	0	0	0	0	0	0	0	0	0	0	0	0	0	0	0	0	0	0	0	0	0	0	0	0	0
China_rumen1104	1	0	0	0	0	0	0	0	1	0	1	0	0	0	0	0	0	0	0	0	0	0	0	0	0	0	0	0	0	0	0	0	0	0	0	0	0	0	0	0	2	0	0	0	0	0	0	0	0
China_rumen1105	0	0	0	1	0	0	0	0	0	0	0	0	0	0	0	0	0	0	0	0	0	0	0	0	0	0	0	0	0	0	0	0	0	0	0	0	0	0	0	0	0	0	0	0	0	0	0	0	0
China_rumen1106	0	0	0	0	0	2	1	1	0	1	0	0	0	0	0	0	0	0	0	0	0	0	0	0	0	0	0	0	0	0	0	0	0	0	0	0	0	0	0	0	0	0	0	0	0	0	0	0	0
China_rumen1107	0	0	0	0	0	1	1	1	1	0	0	0	0	0	0	0	0	0	0	0	0	0	0	0	0	0	0	0	0	0	0	0	0	0	0	0	0	0	0	0	0	0	0	0	0	0	0	0	0
China_rumen1108	1	0	0	0	0	1	0	2	0	0	1	0	0	0	0	0	0	0	0	0	0	0	0	0	0	0	0	0	0	0	0	0	0	0	0	0	0	0	0	0	2	0	0	0	0	0	0	0	0
China_rumen1109	0	0	0	0	1	1	0	1	1	0	0	0	0	0	0	0	0	0	0	0	0	0	0	0	0	0	0	0	0	0	0	0	0	0	0	0	0	0	0	0	0	0	0	0	0	0	0	0	0
China_rumen111	0	0	0	0	0	0	0	1	1	0	0	0	0	0	0	0	0	0	0	0	0	0	0	0	0	0	0	0	0	0	0	0	0	0	0	0	0	0	0	0	0	0	0	0	0	0	0	0	0
China_rumen1110	0	0	0	0	0	1	0	1	0	0	1	0	1	0	0	1	0	0	0	0	0	0	0	0	0	0	0	0	0	0	0	0	0	0	0	0	0	0	0	0	1	0	0	0	0	0	0	0	0
China_rumen1111	0	0	0	0	0	1	1	2	0	1	0	0	0	0	0	0	0	0	0	0	0	0	0	0	0	0	0	0	0	0	0	0	0	0	0	0	0	0	0	0	0	0	0	0	0	0	0	0	0
China_rumen1112	0	0	0	2	0	0	1	2	0	0	1	0	0	0	0	0	1	0	0	0	0	0	0	0	0	0	0	0	0	0	0	0	0	0	0	0	0	0	0	0	1	0	0	0	0	0	0	0	0
China_rumen1113	0	0	0	0	0	2	1	1	1	0	0	0	0	0	0	0	0	0	0	0	0	0	0	0	0	0	0	0	0	0	0	0	0	0	0	0	0	0	0	0	0	0	0	0	0	0	0	0	0
China_rumen1114	0	0	0	0	0	2	0	1	1	0	0	0	0	0	0	0	0	0	0	0	0	0	0	0	0	0	0	0	0	0	0	0	0	0	0	0	0	0	0	0	0	0	0	0	0	0	0	0	0
China_rumen1115	0	1	0	0	0	1	0	1	0	0	1	0	0	0	0	0	0	0	0	0	0	0	0	0	0	0	0	0	0	0	0	0	0	0	0	0	0	0	0	0	1	0	0	0	0	0	0	0	0
China_rumen1116	0	0	0	0	0	2	0	1	1	0	1	0	0	0	0	0	0	0	0	0	0	0	0	0	0	0	0	0	0	0	0	0	0	0	0	0	0	0	0	0	1	0	0	0	0	0	0	0	0
China_rumen1117	0	0	0	1	0	2	0	1	0	0	1	0	0	0	0	0	1	0	0	0	0	0	0	0	0	0	0	0	0	0	0	0	0	0	0	0	0	0	0	0	1	0	0	0	0	0	0	0	0
China_rumen1118	0	0	0	0	0	2	1	2	1	0	0	0	0	0	0	0	0	0	0	0	0	0	0	0	0	0	0	0	0	0	0	0	0	0	0	0	0	0	0	0	0	0	0	0	0	0	0	0	0
China_rumen1119	0	0	1	1	0	1	0	0	0	0	0	0	1	0	0	0	0	0	0	0	0	0	0	0	0	0	0	0	0	0	0	0	0	0	0	0	0	0	0	0	0	0	0	0	0	0	0	0	0
China_rumen112	0	0	0	0	0	1	1	2	0	0	0	0	1	0	1	0	0	0	0	0	0	0	0	0	0	0	0	0	0	0	0	0	0	0	0	0	0	0	0	0	1	0	0	0	1	0	0	1	0
China_rumen1120	0	0	0	0	0	1	0	0	0	0	1	0	0	0	0	0	0	0	0	0	0	0	0	0	0	0	0	0	0	0	0	0	0	0	0	0	0	0	0	0	1	0	0	0	0	0	0	0	0
China_rumen1121	0	0	1	1	0	1	1	2	0	0	0	0	0	0	0	0	0	0	0	0	0	0	0	0	0	0	0	0	0	0	0	0	0	0	0	0	0	0	0	0	0	0	0	0	0	0	0	0	0
China_rumen1122	0	0	0	0	0	2	0	1	1	0	0	0	0	0	0	0	0	0	0	0	0	0	0	0	0	0	0	0	0	0	0	0	0	0	0	0	0	0	0	0	0	0	0	0	0	0	0	0	0
China_rumen1123	0	0	0	0	0	0	0	0	0	0	0	0	0	0	0	0	0	0	0	0	0	0	0	0	0	0	0	0	0	0	1	0	0	0	0	0	0	0	0	0	0	0	0	1	0	0	0	0	0
China_rumen1124	1	1	0	0	1	1	0	1	0	0	1	0	0	0	0	0	0	0	0	0	0	0	0	0	0	0	0	0	0	0	0	0	0	0	0	0	0	0	0	0	1	0	0	0	0	0	0	0	0
China_rumen1125	0	0	0	0	0	1	0	0	0	0	1	0	0	0	0	0	0	0	0	0	0	0	0	0	0	0	0	0	0	0	0	0	0	0	0	0	0	0	0	0	1	0	0	0	0	0	0	0	0
China_rumen1126	0	0	0	0	0	0	0	0	0	0	1	0	0	0	0	0	0	0	0	0	0	0	0	0	0	0	0	0	0	0	0	0	0	0	0	0	0	0	0	0	1	0	0	0	0	0	0	0	0
China_rumen1127	0	0	0	0	2	2	0	1	0	0	0	0	0	0	0	0	0	0	0	0	0	0	0	0	0	0	0	0	0	0	0	0	0	0	0	0	0	0	0	0	0	0	0	0	0	0	0	0	0
China_rumen1128	0	0	0	0	0	1	1	1	0	0	1	0	0	0	0	0	0	0	0	0	0	0	0	0	0	0	0	0	0	0	0	0	0	0	0	0	0	0	0	0	1	0	0	0	0	0	0	0	0
China_rumen1129	0	0	0	0	0	0	1	1	1	0	0	0	0	0	0	0	0	0	0	0	0	0	0	0	0	0	0	0	0	0	0	0	0	0	0	0	0	0	0	0	0	0	0	0	0	0	0	0	0
China_rumen113	0	0	0	1	0	0	0	2	0	0	1	0	0	0	0	0	0	0	0	0	0	0	0	0	0	0	0	0	0	0	0	0	0	0	0	0	0	0	0	0	0	0	0	0	0	0	0	0	0
China_rumen1130	0	0	1	1	0	1	1	2	0	0	0	0	1	0	0	0	1	0	0	0	0	0	0	0	0	0	0	0	0	0	0	0	0	0	0	0	0	0	0	0	0	0	0	0	0	0	0	0	0
China_rumen1131	0	0	0	0	0	3	0	1	0	0	1	0	0	0	0	0	0	0	0	0	0	0	0	0	0	0	0	0	0	0	0	0	0	0	0	0	0	0	0	0	1	0	0	0	0	0	0	0	0
China_rumen1132	0	0	0	0	1	0	0	0	1	0	0	0	0	0	0	0	0	0	0	0	0	0	0	0	0	0	0	0	0	0	0	0	0	0	0	0	0	0	0	0	0	0	0	0	0	0	0	0	0
China_rumen1133	0	0	0	0	1	1	0	1	1	0	0	0	0	0	0	0	0	0	0	0	0	0	0	0	0	0	0	0	0	0	0	0	0	0	0	0	0	0	0	0	0	0	0	0	0	0	0	0	0
China_rumen1134	0	0	0	0	0	1	0	0	0	1	0	0	0	0	0	0	0	0	0	0	0	0	0	0	0	0	0	0	0	0	0	0	0	0	0	0	2	0	0	0	0	0	0	0	0	0	0	0	0
China_rumen1135	0	0	0	0	0	0	0	0	0	0	0	0	0	0	0	0	0	0	0	0	0	0	0	0	0	0	0	0	0	0	0	0	0	0	0	0	0	0	0	0	0	0	0	0	0	0	0	0	0
China_rumen1136	0	0	0	0	0	0	0	1	0	0	1	0	1	0	0	0	0	0	0	0	0	0	0	0	0	0	0	0	0	0	0	0	0	0	0	0	0	0	0	0	1	0	0	0	0	0	1	0	0
China_rumen1137	0	0	0	0	0	0	0	0	0	0	1	0	0	0	0	0	0	0	0	0	0	0	0	0	0	0	0	0	0	0	0	0	0	0	0	0	0	0	0	0	2	0	0	0	0	0	0	0	0
China_rumen1138	0	0	0	0	0	0	0	0	0	0	1	0	0	0	0	0	0	1	0	0	0	0	0	0	0	0	0	0	0	0	0	0	0	0	0	0	0	0	0	0	1	0	0	0	0	0	0	0	0
China_rumen1139	0	0	0	0	0	1	1	0	0	0	1	0	0	0	0	0	0	0	0	0	0	0	0	0	0	0	0	0	0	0	0	0	0	0	0	0	0	0	0	0	0	0	0	0	0	0	0	0	0
China_rumen114	0	0	0	1	0	1	1	1	0	0	1	0	0	0	0	1	0	0	0	0	0	0	0	0	0	0	0	0	0	0	0	0	0	0	0	0	0	0	0	0	3	0	0	0	0	0	0	0	0
China_rumen1140	0	0	1	0	0	1	0	0	0	0	0	0	1	0	0	0	1	0	0	0	0	0	0	0	0	0	0	0	0	0	0	0	0	0	0	0	0	0	0	0	0	0	0	0	0	0	0	0	0
China_rumen1141	0	0	0	1	0	1	0	0	0	0	1	0	0	0	0	0	0	1	0	0	0	0	0	0	0	0	0	0	0	0	0	0	0	0	0	0	0	0	0	0	1	0	0	0	0	0	0	0	0
China_rumen1142	0	0	0	0	0	1	0	1	0	0	1	0	2	0	0	0	0	1	0	0	0	0	0	0	0	0	0	0	0	0	0	0	0	0	0	0	0	0	0	0	1	0	0	0	0	0	0	0	0
China_rumen1143	0	0	0	0	0	0	0	0	0	2	0	0	0	0	0	0	0	0	0	0	0	0	0	0	0	0	0	0	0	0	0	0	0	0	0	0	0	0	0	0	0	0	0	0	0	0	0	0	0
China_rumen1144	0	0	0	0	0	1	0	1	0	0	0	0	0	0	0	0	0	0	0	0	0	0	0	0	0	0	0	0	0	0	0	0	0	0	0	0	0	0	0	0	1	0	0	0	0	0	0	0	0
China_rumen1145	0	0	0	2	0	1	1	2	0	0	0	0	1	0	0	0	0	0	0	0	0	0	0	0	0	0	0	0	0	0	0	0	0	0	0	0	0	0	0	0	0	0	0	0	0	0	0	0	0
China_rumen1146	0	0	0	1	0	0	0	0	0	0	0	0	0	0	0	0	0	0	0	0	0	0	0	0	0	0	0	0	0	0	0	0	0	0	0	0	0	0	0	0	0	0	0	0	0	0	0	0	0
China_rumen1147	0	0	0	0	0	1	1	1	0	0	1	0	1	0	0	0	0	0	0	0	0	0	0	0	0	0	0	0	0	0	0	0	0	0	0	0	0	0	0	0	1	0	0	0	0	0	0	0	0
China_rumen1148	0	0	0	2	0	1	1	2	0	0	1	0	0	0	0	0	0	0	0	0	0	0	0	0	0	0	0	0	0	0	0	0	0	0	0	0	0	0	0	0	1	0	0	0	0	0	0	0	0
China_rumen1149	0	0	0	1	0	0	0	0	0	0	0	0	0	0	0	0	0	0	0	0	0	0	0	0	0	0	0	0	0	0	0	0	0	0	0	0	0	0	0	0	0	0	0	0	0	0	0	0	0
China_rumen115	0	1	0	0	0	1	0	1	1	0	0	0	0	0	0	0	0	0	0	0	0	0	0	0	0	0	0	0	0	0	0	0	0	0	0	0	0	0	0	0	0	0	0	0	0	0	0	0	0
China_rumen1150	0	0	0	0	0	0	0	0	0	0	0	0	0	0	0	0	0	0	0	0	0	0	0	0	0	0	0	0	0	0	0	0	0	0	0	0	0	0	0	0	0	0	0	0	0	0	0	0	0
China_rumen1151	0	0	0	0	0	1	1	1	1	0	0	0	0	0	0	0	0	0	0	0	0	0	0	0	0	0	0	0	0	0	0	0	0	0	0	0	0	0	0	0	0	0	0	0	0	0	0	0	0
China_rumen1152	1	2	0	1	0	1	0	0	0	0	0	0	0	0	0	0	0	0	0	0	0	0	0	0	0	0	0	0	0	0	0	0	0	0	0	0	0	0	0	0	1	0	0	0	0	0	0	0	0
China_rumen1153	1	0	0	0	0	1	0	0	0	0	0	0	0	0	0	0	0	0	0	0	0	0	0	0	0	0	0	0	0	0	0	0	0	0	0	0	0	0	0	0	1	0	0	0	0	0	0	0	0
China_rumen1154	0	0	0	0	0	1	1	2	1	0	0	0	0	0	0	0	0	0	0	0	0	0	0	0	0	0	0	0	0	0	0	0	0	0	0	0	0	0	0	0	0	0	0	0	1	1	0	0	0
China_rumen1155	0	0	0	0	0	0	0	1	0	0	0	0	0	0	0	0	0	0	0	0	0	0	0	0	0	0	0	0	0	0	0	0	0	0	0	0	0	0	0	0	1	0	0	0	0	0	0	0	0
China_rumen1156	1	1	0	0	0	1	0	1	0	0	1	0	1	0	0	0	0	0	0	0	0	0	0	0	0	0	0	0	0	0	0	0	0	0	0	0	0	0	0	0	1	0	0	0	0	0	0	0	0
China_rumen1157	0	0	0	0	0	1	0	1	0	0	1	0	0	0	0	0	0	0	0	0	0	0	0	0	0	0	0	0	0	0	0	0	0	0	0	0	0	0	0	0	1	0	0	0	0	0	0	0	0
China_rumen1158	0	0	0	0	0	1	1	2	0	0	1	0	1	0	0	1	0	1	0	0	0	0	0	0	0	0	0	0	0	0	0	0	0	0	0	0	0	0	0	0	2	0	0	0	0	0	0	0	0
China_rumen1159	1	1	0	0	0	0	0	1	0	0	0	0	0	0	0	0	0	0	0	0	0	0	0	0	0	0	0	0	0	0	0	0	0	0	0	0	0	0	0	0	1	0	0	0	0	0	0	0	0
China_rumen116	0	0	1	0	0	0	0	1	0	0	0	0	0	0	0	0	0	0	0	0	0	0	0	0	0	0	0	0	0	0	0	0	0	0	0	0	0	0	0	0	0	0	0	0	0	0	0	0	0
China_rumen1160	0	0	0	0	1	0	0	0	1	0	0	0	0	0	0	0	0	0	0	0	0	0	0	0	0	0	0	0	0	0	0	0	0	0	0	0	0	0	0	0	0	0	0	0	0	0	0	0	0
China_rumen1161	0	0	0	0	0	2	1	1	1	0	0	0	0	0	0	0	0	0	0	0	0	0	0	0	0	0	0	0	0	0	0	0	0	0	0	0	0	0	0	0	0	0	0	0	0	0	0	0	0
China_rumen1162	0	0	0	0	0	1	1	2	0	0	1	0	0	0	0	1	0	0	0	0	0	0	0	0	0	0	0	0	0	0	0	0	0	0	0	0	0	0	0	0	1	0	0	0	0	0	0	0	0
China_rumen1163	0	0	0	0	1	2	0	1	1	0	0	0	0	0	0	0	0	0	0	0	0	0	0	0	0	0	0	0	0	0	0	0	0	0	0	0	0	0	0	0	0	0	0	0	0	0	0	0	0
China_rumen1164	0	0	0	1	0	0	0	0	0	0	0	0	0	0	0	0	0	0	0	0	0	0	0	0	0	0	0	0	0	0	0	0	0	0	0	0	0	0	0	0	0	0	0	0	0	0	0	0	0
China_rumen1165	0	0	0	1	0	2	0	1	0	0	1	0	0	0	0	0	1	0	0	0	0	0	0	0	0	0	0	0	0	0	0	0	0	0	0	0	0	0	0	0	1	0	0	0	0	0	0	0	0
China_rumen1167	0	0	0	0	0	0	0	0	0	0	1	0	0	0	0	0	0	0	0	0	0	0	0	0	0	0	0	0	0	0	0	0	0	0	0	0	0	0	0	0	1	0	0	0	0	0	0	0	0
China_rumen1169	0	0	0	0	0	0	0	0	0	0	0	0	0	0	0	0	0	0	0	0	0	0	0	0	0	0	0	0	0	0	0	0	0	0	0	0	0	0	0	0	0	0	0	0	0	0	0	0	0
China_rumen117	0	0	0	0	0	1	0	0	2	0	0	0	0	0	0	0	0	0	0	0	0	0	0	0	0	0	0	0	0	0	0	0	0	0	0	0	0	0	0	0	1	0	0	0	0	0	0	0	0
China_rumen1170	0	0	0	1	0	1	1	2	0	0	0	0	1	0	0	0	0	0	0	0	0	0	0	0	0	1	0	0	0	0	0	0	0	0	0	0	0	0	0	0	0	0	0	0	1	1	0	0	0
China_rumen1171	1	1	0	0	1	1	0	1	1	0	1	0	1	0	0	0	0	0	0	0	0	0	0	0	0	0	0	0	0	0	0	0	0	0	0	0	0	0	0	0	1	0	0	0	0	0	0	0	0
China_rumen1172	0	0	0	0	0	1	0	0	0	0	1	0	0	0	0	0	0	0	0	0	0	0	0	0	0	0	0	0	0	0	0	0	0	0	0	0	0	0	0	0	1	0	0	0	0	0	0	0	0
China_rumen1173	0	0	0	0	0	3	1	2	1	0	0	0	0	0	0	0	0	0	0	0	0	0	0	0	0	0	0	0	0	0	0	0	0	0	0	0	0	0	0	0	0	0	0	0	0	0	0	0	0
China_rumen1174	0	0	0	0	0	1	0	1	0	0	1	0	0	0	0	0	0	1	0	0	0	0	0	0	0	0	0	0	0	0	0	0	0	0	0	0	0	0	0	0	2	0	0	0	0	0	0	0	0
China_rumen1175	0	0	0	0	0	0	1	1	1	0	0	0	0	0	0	0	0	0	0	0	0	0	0	0	0	0	0	0	0	0	0	0	0	0	0	0	0	0	0	0	0	0	0	0	0	0	0	0	0
China_rumen1176	0	0	0	0	0	0	0	1	0	0	0	0	0	0	0	0	0	0	0	0	0	0	0	0	0	0	0	0	0	0	0	0	0	0	0	0	0	0	0	0	0	0	0	0	0	0	0	0	0
China_rumen1177	0	0	0	0	0	2	0	2	2	0	0	0	0	0	0	0	0	0	0	0	0	0	0	0	0	0	0	0	0	0	0	0	0	0	0	0	0	0	0	0	0	0	0	0	0	0	0	0	0
China_rumen1178	0	0	0	0	0	1	1	1	0	1	0	0	0	0	0	0	0	0	0	0	0	0	0	0	0	0	0	0	0	0	0	0	0	0	0	0	0	0	0	0	0	0	0	0	0	0	0	0	0
China_rumen1179	1	1	0	0	0	1	0	1	0	1	1	0	0	0	0	0	0	0	0	0	0	0	0	0	0	0	0	0	0	0	0	0	0	0	0	0	0	0	0	0	1	0	0	0	0	0	0	0	0
China_rumen1180	0	0	0	0	0	1	1	2	0	0	0	0	0	0	0	0	0	0	0	0	0	0	0	0	0	0	0	0	0	0	0	0	0	0	0	0	0	0	0	0	0	0	0	0	1	1	0	2	0
China_rumen1181	0	0	0	0	1	2	0	1	0	1	0	0	0	0	0	0	0	0	0	0	0	0	0	0	0	0	0	0	0	0	0	0	0	0	0	0	0	0	0	0	0	0	0	0	0	0	0	0	0
China_rumen1182	0	0	0	0	0	1	1	1	1	0	0	0	0	0	0	0	0	0	0	0	0	0	0	0	0	0	0	0	0	0	0	0	0	0	0	0	0	0	0	0	0	0	0	0	0	0	0	0	0
China_rumen1183	0	0	1	1	0	1	1	2	0	0	0	0	0	0	0	0	0	0	0	0	0	0	0	0	0	0	0	0	0	0	0	0	0	0	0	0	0	0	0	0	0	0	0	0	0	0	0	0	0
China_rumen1184	0	0	0	0	0	1	0	0	0	0	0	0	0	0	0	0	0	0	0	0	0	0	0	0	0	0	0	0	0	0	1	0	0	0	0	0	0	0	0	0	0	0	0	2	0	0	0	0	0
China_rumen1185	0	0	0	0	0	1	0	1	0	0	1	0	0	0	0	0	0	0	0	0	0	0	0	0	1	0	0	0	0	0	0	0	0	0	0	0	0	0	0	0	1	0	0	0	0	0	0	0	0
China_rumen1186	0	0	0	0	0	1	1	1	0	0	1	0	0	0	0	0	0	0	0	0	0	0	0	0	0	0	0	0	0	0	0	0	0	0	0	0	0	0	0	0	3	0	0	0	0	0	0	0	0
China_rumen1187	0	0	0	0	0	1	0	2	0	0	0	0	0	0	0	0	0	0	0	0	0	0	0	0	0	0	0	0	0	0	0	0	0	0	0	0	0	0	0	0	1	0	0	0	0	0	0	0	0
China_rumen1188	0	0	0	1	0	0	0	0	0	0	2	0	0	0	0	0	0	0	0	0	0	0	0	0	0	0	0	0	0	0	0	0	0	0	0	0	0	0	0	0	3	0	0	0	0	0	0	0	0
China_rumen1189	0	0	0	1	0	0	0	0	0	0	0	0	0	0	0	0	0	0	0	0	0	0	0	0	0	0	0	0	0	0	0	0	0	0	0	0	0	0	0	0	0	0	0	0	0	0	0	0	0
China_rumen119	0	0	0	0	0	0	0	0	0	0	1	0	0	0	0	0	0	0	0	0	0	0	0	0	0	0	0	0	0	0	0	0	0	0	0	0	0	0	0	0	1	0	0	0	0	0	0	0	0
China_rumen1190	1	1	0	0	0	0	0	1	1	0	1	0	0	0	0	0	0	0	0	0	0	0	0	0	0	0	0	0	0	0	0	0	0	0	0	0	0	0	0	0	1	0	0	0	0	0	0	0	0
China_rumen1191	0	0	0	0	0	0	0	0	0	0	0	0	0	0	0	0	0	0	0	0	0	0	0	0	0	0	0	0	0	0	0	0	0	0	0	0	0	0	0	0	0	0	0	0	0	0	0	0	0
China_rumen1192	0	0	0	1	0	1	0	1	0	0	1	0	0	0	0	0	0	0	0	0	0	0	0	0	0	0	0	0	0	0	0	0	0	0	0	0	0	0	0	0	1	0	0	0	0	0	0	0	0
China_rumen1193	0	0	1	1	0	0	1	1	0	0	0	0	0	0	0	0	0	0	0	0	0	0	0	0	0	0	0	0	0	0	0	0	0	0	0	0	0	0	0	0	0	0	0	0	0	0	0	0	0
China_rumen1194	0	0	0	1	0	0	0	0	0	1	0	0	1	0	0	0	0	0	0	0	0	0	0	0	0	0	0	0	0	0	0	0	0	0	0	0	0	0	0	0	0	0	0	0	0	0	0	0	0
China_rumen1195	1	0	0	0	0	1	1	2	0	0	0	0	1	0	1	0	0	0	0	0	0	0	0	0	0	0	0	0	0	0	0	0	0	0	0	0	0	0	0	0	0	0	0	0	0	0	1	0	0
China_rumen1196	0	0	0	1	0	1	0	1	0	0	0	0	0	0	0	0	0	0	0	0	0	0	0	0	0	0	0	0	0	0	0	0	0	0	0	0	0	0	0	0	1	0	0	0	0	0	0	0	0
China_rumen1197	0	0	0	0	0	1	0	2	0	0	0	0	1	0	0	0	0	0	0	0	0	0	0	0	0	0	0	0	0	0	0	0	0	0	0	0	0	0	0	0	0	0	0	0	0	0	1	0	0
China_rumen1198	0	0	0	0	0	0	0	0	0	0	0	0	1	0	0	0	1	0	0	0	0	0	0	0	0	0	0	0	0	0	0	0	0	0	0	0	0	0	0	0	0	0	0	0	0	0	0	0	0
China_rumen1199	0	0	0	0	0	0	0	0	0	0	0	0	0	0	0	0	0	0	0	0	0	0	0	0	0	0	0	0	0	0	0	0	0	0	0	0	0	0	0	0	0	0	0	0	0	0	0	0	0
China_rumen12	0	1	0	0	1	0	0	0	3	0	1	0	1	0	0	0	0	0	0	0	0	0	0	0	0	0	0	0	0	0	0	0	0	0	0	0	0	0	0	0	1	0	0	0	0	0	0	0	0
China_rumen120	0	0	0	0	0	1	0	1	0	0	1	0	0	0	0	0	0	0	0	0	0	0	0	0	0	0	0	0	0	0	0	0	0	0	0	0	0	0	0	0	1	0	0	0	0	0	0	0	0
China_rumen1200	0	0	0	0	1	1	0	1	0	1	0	0	0	0	0	0	0	0	0	0	0	0	0	0	0	0	0	0	0	0	0	0	0	0	0	0	0	0	0	0	0	0	0	0	0	0	0	0	0
China_rumen1202	0	0	0	0	0	1	2	2	0	0	0	0	0	0	0	0	0	0	0	0	0	0	0	0	0	0	0	0	0	0	0	0	0	0	0	0	0	0	0	0	0	0	0	0	1	1	0	0	0
China_rumen1203	0	0	0	0	0	0	0	0	0	0	0	0	0	0	0	0	0	0	0	0	0	0	0	0	0	0	0	0	0	0	0	0	0	0	0	0	0	0	0	0	1	0	0	0	0	0	0	0	0
China_rumen1204	0	0	0	0	0	0	0	1	0	0	0	0	0	0	0	0	0	0	0	0	0	0	0	0	0	0	0	0	0	0	0	0	0	0	0	0	0	0	0	0	1	0	0	0	0	0	0	0	0
China_rumen1205	0	0	0	1	0	0	0	1	0	0	0	0	0	0	0	0	0	0	0	0	0	0	0	0	0	0	0	0	0	0	0	0	0	0	0	0	0	0	0	0	0	0	0	0	0	0	0	0	0
China_rumen1206	1	1	0	0	0	1	0	1	0	0	1	0	0	0	0	0	0	0	0	0	0	0	0	0	0	0	0	0	0	0	0	0	0	0	0	0	0	0	0	0	1	0	0	0	0	0	0	0	0
China_rumen1207	0	0	0	0	0	3	0	1	0	1	0	0	0	0	0	0	0	0	0	0	0	0	0	0	0	0	0	0	0	0	0	0	0	0	0	0	0	0	0	0	0	0	0	0	0	0	0	0	0
China_rumen1208	0	0	0	1	0	0	0	0	0	0	0	0	0	0	0	0	0	0	0	0	0	0	0	0	0	0	0	0	0	0	0	0	0	0	0	0	0	0	0	0	0	0	0	0	0	0	0	0	0
China_rumen1209	0	0	0	0	0	2	0	0	0	0	1	0	0	0	0	0	0	0	0	0	0	0	0	0	0	0	0	0	0	0	0	0	0	0	0	0	0	0	0	0	2	0	0	0	0	0	0	0	0
China_rumen121	0	0	0	0	0	1	0	0	1	0	1	0	0	0	0	0	0	0	0	0	0	0	0	0	0	0	0	0	0	0	0	0	0	0	0	0	0	0	0	0	1	0	0	0	0	0	0	0	0
China_rumen1210	0	0	0	0	0	2	0	0	0	0	1	0	0	0	0	0	1	0	0	0	0	0	0	0	0	0	0	0	0	0	0	0	0	0	0	0	0	0	0	0	1	0	0	0	0	0	0	0	0
China_rumen1211	0	0	0	0	0	0	0	1	0	0	1	0	1	0	0	1	0	0	0	0	0	0	0	0	0	0	0	0	0	0	0	0	0	0	0	0	0	0	0	0	0	0	0	0	0	0	0	0	0
China_rumen1212	0	0	0	0	1	1	0	2	0	0	0	0	0	0	0	0	0	0	0	0	0	0	0	0	0	0	0	0	0	0	0	0	0	0	0	0	0	0	0	0	0	0	0	0	0	0	0	0	0
China_rumen1213	0	0	1	1	0	2	0	2	0	0	0	0	0	0	0	0	0	0	0	0	0	0	0	0	0	0	0	0	0	0	0	0	0	0	0	0	0	0	0	0	0	0	0	0	0	0	0	0	0
China_rumen1214	1	1	0	0	0	1	1	2	0	0	1	0	1	0	0	0	1	1	0	0	0	0	0	0	0	0	0	0	0	0	0	0	0	0	0	0	0	0	0	0	1	0	0	0	0	0	0	0	0
China_rumen1215	0	0	0	0	0	1	0	1	0	0	0	0	0	0	0	0	0	0	0	0	0	0	0	0	0	0	0	0	0	0	0	0	0	0	0	0	0	0	0	0	0	0	0	0	0	0	0	0	0
China_rumen1216	0	0	0	0	1	1	1	1	0	1	0	0	0	0	0	0	0	0	0	0	0	0	0	0	0	0	0	0	0	0	0	0	0	0	0	0	0	0	0	0	0	0	0	0	0	0	0	0	0
China_rumen1217	0	0	0	0	0	0	1	1	0	0	0	0	0	0	0	0	0	0	0	0	0	0	0	0	0	0	0	0	0	0	0	0	0	0	0	0	0	0	0	0	0	0	0	0	0	0	0	0	0
China_rumen1218	0	0	0	0	1	2	0	1	0	0	0	0	0	0	0	0	0	0	0	0	0	0	0	0	0	0	0	0	0	0	0	0	0	0	0	0	0	0	0	0	0	0	0	0	0	0	0	0	0
China_rumen1219	0	0	0	1	0	0	0	3	0	0	1	0	1	0	0	0	0	0	0	0	0	0	0	0	0	0	0	0	0	0	0	0	0	0	0	0	0	0	0	0	1	0	0	0	0	0	1	0	0
China_rumen122	0	0	0	0	0	2	0	0	0	0	0	0	0	0	0	0	0	0	0	0	0	0	0	0	0	0	0	0	0	0	0	0	0	0	0	0	0	0	0	0	0	0	0	0	0	0	0	0	0
China_rumen1220	0	0	0	0	1	2	0	1	1	0	0	0	0	0	0	0	0	0	0	0	0	0	0	0	0	0	0	0	0	0	0	0	0	0	0	0	0	0	0	0	0	0	0	0	0	0	0	0	0
China_rumen1221	0	0	0	0	0	2	1	2	1	0	0	0	0	0	0	0	0	0	0	0	0	0	0	0	0	0	0	0	0	0	0	0	0	0	0	0	0	0	0	0	0	0	0	0	0	0	0	0	0
China_rumen1222	1	1	0	0	0	1	0	1	0	0	0	0	1	0	0	0	0	0	0	0	0	0	0	0	0	0	0	0	0	0	0	0	0	0	0	0	0	0	0	0	0	0	0	0	0	0	0	0	0
China_rumen1223	1	0	0	0	0	1	0	1	1	0	0	0	0	0	0	0	0	0	0	0	0	0	0	0	0	0	0	0	0	0	0	0	0	0	0	0	0	0	0	0	1	0	0	0	0	0	0	0	0
China_rumen1224	0	0	0	0	0	0	0	1	0	0	3	0	1	0	0	0	0	2	0	0	0	0	0	0	0	0	0	0	0	0	0	0	0	0	0	0	0	0	0	0	4	0	0	0	0	0	0	0	0
China_rumen1225	0	0	0	0	0	1	0	1	0	0	1	0	0	0	0	0	0	0	0	0	0	0	0	0	1	0	0	0	0	0	0	0	0	0	0	0	0	0	0	0	1	0	0	0	0	0	0	0	0
China_rumen1226	1	1	0	0	0	0	0	2	0	0	0	0	0	0	0	0	0	0	0	0	0	0	0	0	0	0	0	0	0	0	0	0	0	0	0	0	0	0	0	0	0	0	0	0	0	0	0	0	0
China_rumen1227	0	0	0	0	0	0	0	0	0	0	0	0	0	0	0	0	0	0	0	0	0	0	0	0	0	0	0	0	0	0	1	0	0	0	0	0	0	0	0	0	0	0	0	0	0	0	0	0	0
China_rumen1228	0	0	0	0	0	1	1	0	1	0	0	0	0	0	0	0	0	0	0	0	0	0	0	0	0	0	0	0	0	0	0	0	0	0	0	0	0	0	0	0	0	0	0	0	0	0	0	0	0
China_rumen1229	0	0	0	0	0	1	1	1	1	0	0	0	0	0	0	0	0	0	0	0	0	0	0	0	0	0	0	0	0	0	0	0	0	0	0	0	0	0	0	0	0	0	0	0	0	0	0	0	0
China_rumen123	0	0	0	0	0	2	0	0	0	0	0	0	1	0	0	0	0	0	0	0	0	0	0	0	0	0	0	0	0	0	0	0	0	0	0	0	0	0	0	0	1	0	0	0	0	0	0	0	0
China_rumen1230	0	0	0	0	0	1	0	0	0	0	0	0	0	0	0	0	0	0	0	0	0	0	0	0	0	0	0	0	0	0	1	0	0	0	0	0	0	0	0	0	0	0	0	3	0	0	0	0	0
China_rumen1231	0	0	0	0	0	1	1	1	0	0	1	0	0	0	0	0	0	0	0	0	0	0	0	0	0	0	0	0	0	0	0	0	0	0	0	0	0	0	0	0	2	0	0	0	1	1	0	0	0
China_rumen1232	0	0	0	0	0	1	0	1	1	0	0	0	0	0	0	0	0	0	0	0	0	0	0	0	0	0	0	0	0	0	0	0	0	0	0	0	0	0	0	0	0	0	0	0	0	0	0	0	0
China_rumen1234	0	0	0	0	0	2	0	1	1	0	0	0	0	0	0	0	0	0	0	0	0	0	0	0	0	0	0	0	0	0	0	0	0	0	0	0	0	0	0	0	0	0	0	0	0	0	0	0	0
China_rumen1235	0	0	0	1	0	0	0	0	0	0	0	0	0	0	0	0	0	0	0	0	0	0	0	0	0	0	0	0	0	0	0	0	0	0	0	0	0	0	0	0	0	0	0	0	0	0	0	0	0
China_rumen1236	0	0	0	1	0	0	0	0	0	0	0	0	1	0	0	0	1	0	0	0	0	0	0	0	0	0	0	0	0	0	0	0	0	0	0	0	0	0	0	0	0	0	0	0	0	0	0	0	0
China_rumen1237	0	0	0	0	0	1	1	0	0	0	0	0	0	0	0	0	0	0	0	0	0	0	0	0	0	0	0	0	0	0	0	0	0	0	0	0	0	0	0	0	0	0	0	3	0	0	0	0	0
China_rumen1238	0	0	0	0	0	0	0	1	1	0	0	0	0	0	0	0	0	0	0	0	0	0	0	0	0	0	0	0	0	0	0	0	0	0	0	0	0	0	0	0	0	0	0	0	0	0	0	0	0
China_rumen1239	0	0	0	0	0	2	1	2	0	0	0	0	1	0	1	0	0	0	0	0	0	0	0	0	0	0	0	0	0	0	0	0	0	0	0	0	0	0	0	0	0	0	0	0	0	0	0	0	0
China_rumen124	0	0	0	1	0	1	0	1	0	0	0	0	0	0	0	0	0	0	0	0	0	0	0	0	0	0	0	0	0	0	0	0	0	0	0	0	0	0	0	0	1	0	0	0	0	0	0	0	0
China_rumen1240	0	0	0	0	1	1	0	1	0	1	0	0	0	0	0	0	0	0	0	0	0	0	0	0	0	0	0	0	0	0	0	0	0	0	0	0	0	0	0	0	0	0	0	0	0	0	0	0	0
China_rumen1241	1	1	0	0	0	0	1	2	0	0	0	0	1	0	0	0	0	0	0	0	0	0	0	0	0	0	0	0	0	0	0	0	0	0	0	0	0	0	0	0	0	0	0	0	0	0	0	0	0
China_rumen1242	0	0	0	0	0	2	1	2	1	0	0	0	0	0	0	0	0	0	0	0	0	0	0	0	0	0	0	0	0	0	0	0	0	0	0	0	0	0	0	0	0	0	0	0	0	0	0	0	0
China_rumen1243	0	0	0	0	0	1	0	0	0	0	0	0	0	0	0	0	0	0	0	0	0	0	0	0	0	0	0	0	0	0	0	0	0	0	0	0	0	0	0	0	0	0	0	0	1	1	1	2	0
China_rumen1245	1	1	0	0	0	1	0	1	0	0	1	0	0	0	0	0	0	0	0	0	0	0	0	0	0	0	0	0	0	0	0	0	0	0	0	0	0	0	0	0	1	0	0	0	0	0	0	0	0
China_rumen1246	0	0	0	0	0	2	0	1	1	0	0	0	0	0	0	0	0	0	0	0	0	0	0	0	0	0	0	0	0	0	0	0	0	0	0	0	0	0	0	0	0	0	0	0	0	0	0	0	0
China_rumen1248	0	0	0	0	0	1	0	1	0	0	1	0	0	0	0	0	0	0	0	0	0	0	0	0	0	0	0	0	0	0	0	0	0	0	0	0	0	0	0	0	1	0	0	0	0	0	0	0	0
China_rumen1249	0	0	0	0	0	1	0	1	0	0	0	0	0	0	0	0	0	0	0	0	0	0	0	0	0	0	0	0	0	0	0	0	0	0	0	0	0	0	0	0	0	0	0	0	0	0	0	0	0
China_rumen125	0	0	0	0	0	2	0	1	0	0	0	0	1	0	0	0	0	0	0	0	0	0	0	0	0	0	0	0	0	0	0	0	0	0	0	0	0	0	0	0	2	0	0	0	0	0	0	0	0
China_rumen1250	0	0	0	0	0	0	0	0	0	0	1	0	0	0	1	1	0	0	0	0	0	0	0	0	0	0	0	0	0	0	0	0	0	0	0	0	0	0	0	0	1	0	0	0	0	0	0	0	0
China_rumen1251	0	0	0	1	0	1	1	2	0	0	1	0	0	0	0	0	0	0	0	0	0	0	0	0	0	0	0	0	0	0	0	0	0	0	0	0	0	0	0	0	1	0	0	0	0	0	0	0	0
China_rumen1252	0	0	0	0	0	1	0	1	0	0	2	0	0	0	0	0	0	0	0	0	0	0	0	0	0	0	0	0	0	0	0	0	0	0	0	0	0	0	0	0	4	0	0	0	0	0	0	0	0
China_rumen1253	0	0	0	0	0	0	0	2	0	0	0	0	1	0	0	0	1	0	0	0	0	0	0	0	0	0	0	0	0	0	0	0	0	0	0	0	0	0	0	0	0	0	0	0	0	0	0	0	0
China_rumen1254	0	0	1	0	0	0	0	1	0	0	1	0	1	0	0	0	1	1	0	0	0	0	0	0	0	0	0	0	0	0	0	0	0	0	0	0	0	0	0	0	2	0	0	0	0	0	0	0	0
China_rumen1255	0	0	0	0	0	1	0	0	1	0	0	0	0	0	0	0	0	0	0	0	0	0	0	0	0	0	0	0	0	0	0	0	0	0	0	0	0	0	0	0	0	0	0	0	0	0	0	0	0
China_rumen1256	0	0	0	0	0	1	0	1	1	0	0	0	0	0	0	0	0	0	0	0	0	0	0	0	0	0	0	0	0	0	0	0	0	0	0	0	0	0	0	0	0	0	0	0	0	0	0	0	0
China_rumen1257	0	0	0	1	0	1	0	1	0	0	0	0	0	0	0	0	0	0	0	0	0	0	0	0	0	0	0	0	0	0	0	0	0	0	0	0	0	0	0	0	1	0	0	0	0	0	0	0	0
China_rumen1258	1	1	0	0	0	1	0	1	0	0	0	0	1	0	0	0	0	0	0	0	0	0	0	0	0	1	0	0	0	0	0	0	0	0	0	0	0	0	0	0	0	0	0	0	0	0	0	0	0
China_rumen1259	1	1	0	0	0	1	0	1	1	0	1	0	0	0	0	0	0	0	0	0	0	0	0	0	0	0	0	0	0	0	0	0	0	0	0	0	0	0	0	0	1	0	0	0	0	0	0	0	0
China_rumen126	0	0	0	0	0	0	0	1	0	0	1	0	0	0	0	0	0	0	0	0	0	0	0	0	0	0	0	0	0	0	0	0	0	0	0	0	0	0	0	0	1	0	0	0	0	0	0	0	0
China_rumen1260	0	0	0	3	0	0	0	2	0	0	0	0	0	0	0	0	1	0	0	0	0	0	0	0	0	0	0	0	0	0	0	0	0	0	0	0	0	0	0	0	0	0	0	0	0	0	0	0	0
China_rumen1261	0	0	0	0	0	0	0	0	0	0	1	0	0	0	0	0	0	0	0	0	0	0	0	0	0	0	0	0	0	0	0	0	0	0	0	0	0	0	0	0	2	0	0	0	0	0	0	0	0
China_rumen1262	0	0	0	1	0	1	0	1	0	0	1	0	0	0	0	0	0	0	0	0	0	0	0	0	0	0	0	0	0	0	0	0	0	0	0	0	0	0	0	0	1	0	0	0	0	0	0	0	0
China_rumen1263	0	0	0	0	0	1	0	0	0	0	0	0	0	0	0	0	0	0	0	0	0	0	0	0	0	0	0	0	0	0	0	0	0	0	0	0	0	0	0	0	0	0	0	2	0	0	0	0	0
China_rumen1264	1	1	0	0	0	1	0	1	1	0	1	0	0	0	0	0	0	0	0	0	0	0	0	0	0	0	0	0	0	0	0	0	0	0	0	0	0	0	0	0	1	0	0	0	0	0	0	0	0
China_rumen1265	0	0	0	0	0	0	0	1	0	0	0	0	1	0	1	0	0	0	0	0	0	0	0	0	0	0	0	0	0	0	0	0	0	0	0	0	0	0	0	0	0	0	0	0	0	0	0	0	0
China_rumen1266	1	1	0	1	0	1	1	2	0	0	0	0	0	0	0	0	0	0	0	0	0	0	0	0	0	0	0	1	0	0	0	0	0	0	0	0	0	0	0	0	0	0	0	0	0	0	0	0	0
China_rumen1267	0	0	1	0	0	1	1	2	0	0	0	0	1	0	0	0	1	0	0	0	0	0	0	0	0	0	0	0	0	0	0	0	0	0	0	0	0	0	0	0	0	0	0	0	0	0	1	0	0
China_rumen1268	0	0	0	0	0	1	0	1	0	0	0	0	1	0	0	0	0	1	0	0	0	0	0	0	0	0	0	0	0	0	0	0	0	0	0	0	0	0	0	0	1	0	0	0	0	0	0	0	0
China_rumen127	0	0	0	0	0	0	0	1	0	0	0	0	0	0	0	0	0	1	0	0	0	0	0	0	0	0	0	0	0	0	0	0	0	0	0	0	0	0	0	0	0	0	0	0	0	0	0	0	0
China_rumen1270	0	0	0	0	0	0	1	2	0	0	0	0	0	0	0	0	0	0	0	0	0	0	0	0	0	0	0	0	0	0	0	0	0	0	0	0	0	0	0	0	0	0	0	0	1	0	0	1	0
China_rumen1271	0	0	0	0	0	2	0	0	0	0	1	0	0	0	0	0	0	0	0	0	0	0	0	0	0	0	0	0	0	0	0	0	0	0	0	0	0	0	0	0	1	0	0	0	0	0	0	0	0
China_rumen1272	0	1	0	0	0	1	0	0	0	0	0	0	1	0	1	0	0	0	0	0	0	0	0	0	0	0	0	0	0	0	0	0	0	0	0	0	0	0	0	0	1	0	0	0	0	0	0	0	0
China_rumen1273	0	0	0	0	0	0	0	0	0	0	1	0	1	0	0	0	0	0	0	0	0	0	0	0	0	0	0	0	0	0	0	0	0	0	0	0	0	0	0	0	1	0	0	0	0	0	0	0	0
China_rumen1274	0	0	0	0	0	0	0	0	0	0	1	0	0	0	0	0	0	0	0	0	0	0	0	0	0	0	0	0	0	0	0	0	0	0	0	0	0	0	0	0	1	0	0	0	0	0	0	0	0
China_rumen1275	0	0	0	0	0	2	1	0	1	0	0	0	0	0	0	0	0	0	0	0	0	0	0	0	0	0	0	0	0	0	0	0	0	0	0	0	0	0	0	0	0	0	0	0	0	0	0	0	0
China_rumen1276	0	0	0	0	0	0	0	0	0	0	1	0	0	0	0	0	0	0	0	0	0	0	0	0	0	0	0	0	0	0	0	0	0	0	0	0	0	0	0	0	1	0	0	0	0	0	0	0	0
China_rumen1278	1	1	0	0	0	1	0	0	0	0	0	0	1	0	0	0	0	0	0	0	0	0	0	0	0	0	0	1	0	0	0	0	0	0	0	0	0	0	0	0	0	0	0	0	0	0	0	0	0
China_rumen1279	0	0	0	1	0	0	1	0	0	0	1	0	1	0	0	0	0	0	0	0	0	0	0	0	0	0	0	0	0	0	0	0	0	0	0	0	0	0	0	0	1	0	0	0	0	0	0	0	0
China_rumen128	0	0	0	0	0	1	0	0	0	0	0	0	1	0	0	0	0	0	0	0	0	0	0	0	0	0	0	0	0	0	0	0	0	0	0	0	0	0	0	0	0	0	0	0	0	0	0	1	0
China_rumen1280	0	0	0	0	0	1	0	1	0	0	0	0	1	0	1	0	0	0	0	0	0	0	0	0	0	0	0	0	0	0	0	0	0	0	0	0	0	0	0	0	1	0	0	0	0	0	0	1	0
China_rumen1281	0	0	0	0	0	0	0	2	0	0	1	0	1	0	0	0	0	0	0	0	0	0	0	0	0	0	0	0	0	0	0	0	0	0	0	0	0	0	0	0	0	0	0	0	0	0	0	0	0
China_rumen1282	0	0	0	1	0	0	0	0	0	0	0	0	0	0	0	0	0	0	0	0	0	0	0	0	0	0	0	0	0	0	0	0	0	0	0	0	0	0	0	0	0	0	0	0	0	0	0	0	0
China_rumen1283	0	0	0	0	0	0	0	0	0	0	0	0	0	0	0	0	0	0	0	0	0	0	0	0	0	0	0	0	0	0	0	0	0	0	0	0	0	0	0	0	0	0	0	0	0	0	0	0	0
China_rumen1284	0	0	0	1	0	0	0	2	0	0	0	0	0	0	0	0	0	0	0	0	0	0	0	0	0	1	0	0	0	0	0	0	0	0	0	0	0	0	0	0	0	0	0	0	0	0	0	0	0
China_rumen1285	0	0	0	0	0	2	0	0	1	0	1	0	0	0	0	0	0	0	0	0	0	0	0	0	0	0	0	0	0	0	0	0	0	0	0	0	0	0	0	0	1	0	0	0	0	0	0	0	0
China_rumen1286	0	0	0	0	0	0	0	0	0	0	0	0	0	0	0	0	0	0	0	0	0	0	0	0	0	0	0	0	0	0	0	0	0	0	0	0	0	0	0	0	3	0	0	0	2	2	0	1	0
China_rumen1287	0	0	0	0	1	2	1	2	1	0	0	0	0	0	0	0	0	0	0	0	0	0	0	0	0	0	0	0	0	0	0	0	0	0	0	0	0	0	0	0	0	0	0	0	0	0	0	0	0
China_rumen1288	0	0	0	0	0	2	0	0	0	0	0	0	0	0	0	0	0	0	0	0	0	0	0	0	0	0	0	0	0	0	0	0	0	0	0	0	0	0	0	0	0	0	0	0	0	0	0	0	0
China_rumen1289	0	0	0	0	0	1	1	0	0	0	1	0	0	0	0	0	0	0	0	0	0	0	0	0	0	0	0	0	0	0	0	0	0	0	0	0	0	0	0	0	1	0	0	0	0	0	0	0	0
China_rumen129	0	0	0	0	1	1	0	1	1	1	0	0	0	0	0	0	0	0	0	0	0	0	0	0	0	0	0	0	0	0	0	0	0	0	0	0	0	0	0	0	0	0	0	0	0	0	0	0	0
China_rumen1290	0	0	0	0	0	1	0	1	0	0	0	0	0	0	0	0	0	0	0	0	0	0	0	0	0	0	0	0	0	0	0	0	0	0	0	0	0	0	0	0	1	0	0	0	0	0	0	0	0
China_rumen1291	0	0	0	0	0	1	0	1	0	0	0	0	0	0	0	0	0	0	0	0	0	0	0	0	0	0	0	0	0	0	0	0	0	0	0	0	0	0	0	0	1	0	0	0	0	0	0	0	0
China_rumen1292	0	0	0	0	0	0	1	2	0	0	2	0	0	0	0	0	0	0	0	0	0	0	0	0	0	0	0	0	0	0	0	0	0	0	0	0	0	0	0	0	2	0	0	0	0	0	0	0	0
China_rumen1293	0	0	0	0	0	1	1	2	0	0	0	0	1	0	0	0	1	0	0	0	0	0	0	0	0	0	0	0	0	0	0	0	0	0	0	0	0	0	0	0	0	0	0	0	0	0	0	0	0
China_rumen1294	0	0	0	0	0	2	0	0	0	0	1	0	1	0	0	0	0	0	0	0	0	0	0	0	0	0	0	0	0	0	0	0	0	0	0	0	0	0	0	0	1	0	0	0	0	0	0	0	0
China_rumen1295	1	1	0	0	0	1	0	1	0	1	1	0	0	0	0	0	0	0	0	0	0	0	0	0	0	0	0	0	0	0	0	0	0	0	0	0	0	0	0	0	1	0	0	0	0	0	0	0	0
China_rumen1296	0	0	0	0	0	1	0	1	0	0	1	0	0	0	0	0	0	0	0	0	0	0	0	0	0	0	0	1	0	0	0	0	0	0	0	0	0	0	0	0	1	0	0	0	0	0	0	0	0
China_rumen1297	0	0	0	1	0	0	1	3	0	0	0	0	0	0	0	0	0	0	0	0	0	0	0	0	0	1	0	0	0	0	0	0	0	0	0	0	0	0	0	0	0	0	0	0	0	0	1	0	0
China_rumen1298	0	0	0	0	1	0	0	0	0	0	1	0	0	0	0	0	0	0	0	0	0	0	0	0	0	0	0	0	0	0	0	0	0	0	0	0	0	0	0	0	1	0	0	0	0	0	0	0	0
China_rumen1299	0	0	0	0	0	0	0	0	0	0	0	0	0	0	0	0	0	0	0	0	0	0	0	0	0	0	0	0	0	0	0	0	0	0	0	0	0	0	0	0	0	0	0	0	0	0	0	0	0
China_rumen13	0	0	0	1	0	1	0	2	0	0	0	0	0	0	0	0	0	0	0	0	0	0	0	0	0	1	0	0	0	0	0	0	0	0	0	0	0	0	0	0	0	0	0	0	0	0	0	0	0
China_rumen130	0	0	0	0	0	2	1	1	0	0	0	0	0	0	0	0	0	0	0	0	0	0	0	0	0	0	0	0	0	0	0	0	0	0	0	0	0	0	0	0	0	0	0	0	0	0	0	0	0
China_rumen1300	0	0	0	0	0	0	0	0	2	0	0	0	0	0	0	0	0	0	0	0	0	0	0	0	0	0	0	0	0	0	0	0	0	0	0	0	0	0	0	0	0	0	0	0	0	0	0	0	0
China_rumen1301	0	0	0	0	0	2	0	0	0	0	0	0	0	0	0	0	0	0	0	0	0	0	0	0	0	0	0	0	0	0	0	0	0	0	0	0	0	0	0	0	0	0	0	0	0	0	0	0	0
China_rumen1302	0	0	0	0	0	1	0	1	2	0	0	0	0	0	0	0	0	0	0	0	0	0	0	0	0	0	0	0	0	0	0	0	0	0	0	0	0	0	0	0	0	0	0	0	0	0	0	0	0
China_rumen1303	0	0	0	0	0	0	0	0	1	0	0	0	0	0	0	0	0	0	0	0	0	0	0	0	0	0	0	0	0	0	0	0	0	0	0	0	0	0	0	0	1	0	0	0	0	0	0	0	0
China_rumen1304	0	0	0	1	0	0	0	0	0	0	0	0	0	0	0	0	0	0	0	0	0	0	0	0	0	0	0	0	0	0	0	0	0	0	0	0	0	0	0	0	0	0	0	0	0	0	0	0	0
China_rumen1305	0	1	0	0	0	1	1	1	0	0	0	0	1	0	0	0	1	0	0	0	0	0	0	0	0	0	0	0	0	0	0	0	0	0	0	0	0	0	0	0	0	0	0	0	0	0	0	0	0
China_rumen1306	0	0	0	0	0	1	0	1	0	0	2	0	0	0	0	0	0	0	0	0	0	0	0	0	0	0	0	0	0	0	0	0	0	0	0	0	0	0	0	0	2	0	0	0	0	0	0	0	0
China_rumen1307	0	0	0	0	0	1	0	1	0	1	0	0	0	0	0	0	0	0	0	0	0	0	0	0	0	0	0	0	0	0	0	0	0	0	0	0	0	0	0	0	0	0	0	0	0	0	0	0	0
China_rumen1308	0	0	0	0	0	1	0	0	1	0	1	0	0	0	0	0	0	0	0	0	0	0	0	0	0	0	0	0	0	0	0	0	0	0	0	0	0	0	0	0	1	0	0	0	0	0	0	0	0
China_rumen1309	1	0	0	0	0	1	1	2	0	0	1	0	0	0	0	0	1	0	0	0	0	0	0	0	0	0	0	0	0	0	0	0	0	0	0	0	0	0	0	0	1	0	0	0	0	0	0	0	0
China_rumen131	0	2	0	0	0	0	0	0	0	0	0	0	1	0	0	0	0	0	0	0	0	0	0	0	0	0	0	0	0	0	0	0	0	0	0	0	0	0	0	0	1	0	0	0	0	0	0	0	0
China_rumen1310	0	0	1	1	0	1	1	2	0	0	0	0	1	0	0	0	1	0	0	0	0	0	0	0	0	0	0	0	0	0	0	0	0	0	0	0	0	0	0	0	0	0	0	0	0	0	0	0	0
China_rumen1311	0	0	0	0	2	1	0	0	0	0	0	0	0	0	0	0	0	0	0	0	0	0	0	0	0	0	0	0	0	0	0	0	0	0	0	0	0	0	0	0	0	0	0	0	0	0	0	0	0
China_rumen1312	0	0	0	0	0	1	0	0	0	1	0	0	0	0	0	0	0	0	0	0	0	0	1	0	0	0	0	0	0	0	0	0	0	0	1	0	0	0	0	0	0	0	0	0	0	0	0	0	1
China_rumen1313	1	0	0	0	0	2	0	0	0	0	2	0	0	0	0	0	0	0	0	0	0	0	0	0	0	0	0	1	0	0	0	0	0	0	0	0	0	0	0	0	1	0	0	0	0	0	0	0	0
China_rumen1314	0	0	0	0	0	2	0	1	1	0	1	0	0	0	0	0	0	0	0	0	0	0	0	0	0	0	0	0	0	0	0	0	0	0	0	0	0	0	0	0	1	0	0	0	0	0	0	0	0
China_rumen1315	0	0	0	0	0	0	0	1	0	0	0	0	0	0	0	0	1	0	0	0	0	0	0	0	0	0	0	0	0	0	0	0	0	0	0	0	0	0	0	0	0	0	0	0	0	0	0	0	0
China_rumen1316	0	0	0	0	0	1	0	1	0	0	1	0	0	0	0	1	0	0	0	0	0	0	0	0	0	0	0	0	0	0	0	0	0	0	0	0	0	0	0	0	0	0	0	0	0	0	0	0	0
China_rumen1317	0	0	0	0	0	0	0	2	0	0	1	0	0	0	0	1	1	0	0	0	0	0	0	0	0	0	0	0	0	0	0	0	0	0	0	0	0	0	0	0	1	0	0	0	0	0	0	0	0
China_rumen1318	0	0	0	0	0	1	0	0	0	0	0	0	0	0	0	0	0	0	0	0	0	0	0	0	0	0	0	0	0	0	0	0	0	0	0	0	0	0	0	0	1	0	0	0	0	0	0	0	0
China_rumen1319	0	0	0	0	0	1	0	0	0	0	1	0	0	0	1	0	0	0	0	0	0	0	0	0	0	0	0	0	0	0	0	0	0	0	0	0	0	0	0	0	2	0	0	0	0	0	0	0	0
China_rumen132	0	0	0	0	0	1	0	0	1	0	0	0	0	0	0	0	0	0	0	0	0	0	0	0	0	0	0	0	0	0	0	0	0	0	0	0	0	0	0	0	0	0	0	0	0	0	0	0	0
China_rumen1320	0	0	0	0	0	2	0	1	1	0	0	0	0	0	0	0	0	0	0	0	0	0	0	0	0	0	0	0	0	0	0	0	0	0	0	0	0	0	0	0	0	0	0	0	0	0	0	0	0
China_rumen1321	0	0	0	0	0	0	0	0	0	0	0	0	0	0	1	0	0	0	0	0	0	0	0	0	0	0	0	0	0	0	0	0	0	0	0	0	0	0	0	0	1	0	0	0	0	0	0	2	0
China_rumen1322	0	0	0	0	1	1	1	2	1	0	0	0	0	0	0	0	0	0	0	0	0	0	0	0	0	0	0	0	0	0	0	0	0	0	0	0	0	0	0	0	0	0	0	0	0	0	0	0	0
China_rumen1323	0	0	0	0	0	0	0	0	0	0	0	0	0	0	0	0	0	0	0	0	0	0	0	0	0	0	0	0	0	0	0	0	0	0	0	0	0	0	0	0	0	0	0	0	0	0	0	0	0
China_rumen1324	0	0	0	0	0	1	0	1	0	0	0	0	0	0	0	1	0	0	0	0	0	0	0	0	0	0	0	0	0	0	0	0	0	0	0	0	0	0	0	0	1	0	0	0	0	0	0	0	0
China_rumen1325	0	0	0	0	0	1	0	1	0	0	0	0	0	0	0	0	0	0	0	0	0	0	0	0	0	0	0	0	0	0	0	0	0	0	0	0	0	0	0	0	0	0	0	0	0	0	0	0	0
China_rumen1326	0	0	0	0	0	1	0	3	0	0	0	0	1	0	0	0	0	0	0	0	0	0	0	0	0	0	0	0	0	0	0	0	0	0	0	0	0	0	0	0	0	0	0	0	0	0	1	0	0
China_rumen1327	0	0	0	1	0	0	0	1	0	0	0	0	0	0	0	0	0	0	0	0	0	0	0	0	0	0	0	0	0	0	0	0	0	0	0	0	0	0	0	0	0	0	0	0	0	0	0	0	0
China_rumen1328	0	0	0	0	0	0	0	1	0	0	1	0	1	0	0	0	0	1	0	0	0	0	0	0	0	0	0	0	0	0	0	0	0	0	0	0	0	0	0	0	1	0	0	0	0	0	1	0	0
China_rumen1329	0	0	0	1	0	0	0	0	0	0	0	0	0	0	0	0	0	0	0	0	0	0	0	0	0	0	0	0	0	0	0	0	0	0	0	0	0	0	0	0	0	0	0	0	1	0	0	1	0
China_rumen133	0	0	0	0	0	0	0	1	1	0	0	0	0	0	0	0	0	0	0	0	0	0	0	0	0	0	0	0	0	0	0	0	0	0	0	0	0	0	0	0	0	0	0	0	0	0	0	0	0
China_rumen1331	1	1	0	1	0	1	1	2	0	0	0	0	1	0	0	0	1	0	0	0	0	0	0	0	0	0	0	0	0	0	0	0	0	0	0	0	0	0	0	0	0	0	0	0	0	0	0	0	0
China_rumen1333	0	0	0	0	0	1	0	0	2	0	0	0	0	0	0	0	0	0	0	0	0	0	0	0	0	0	0	0	0	0	0	0	0	0	0	0	0	0	0	0	0	0	0	0	0	0	0	0	0
China_rumen1334	0	0	0	0	0	0	0	0	0	0	0	0	0	0	0	0	1	0	0	0	0	0	0	0	0	0	0	0	0	0	0	0	0	0	0	0	0	0	0	0	0	0	0	0	0	0	0	0	0
China_rumen1335	0	0	0	0	0	1	0	0	0	1	0	0	0	0	0	0	0	0	0	0	0	0	0	0	0	0	0	0	0	0	0	0	0	0	0	0	1	0	0	0	0	0	0	0	0	0	0	0	0
China_rumen1336	0	0	0	0	1	0	0	0	0	0	0	0	0	0	0	0	0	0	0	0	0	0	0	0	0	0	0	0	0	0	0	0	0	0	0	0	0	0	0	0	0	0	0	0	0	0	0	0	0
China_rumen1337	0	0	0	0	0	1	0	0	0	0	1	0	0	0	0	0	0	0	0	0	0	0	0	0	0	0	0	0	0	0	0	0	0	0	0	0	0	0	0	0	4	0	0	0	0	0	0	1	0
China_rumen1338	1	1	0	0	0	1	0	2	0	0	0	0	1	0	0	0	0	0	0	0	0	0	0	0	0	0	0	0	0	0	0	0	0	0	0	0	0	0	0	0	0	0	0	0	0	0	1	0	0
China_rumen1339	0	0	0	0	0	2	0	0	1	0	0	0	0	0	0	0	0	0	0	0	0	0	0	0	0	0	0	0	0	0	0	0	0	0	0	0	0	0	0	0	0	0	0	0	0	0	0	0	0
China_rumen134	0	0	0	0	0	1	0	1	0	0	1	0	0	0	0	0	0	0	0	0	0	0	0	0	0	0	0	0	0	0	0	0	0	0	0	0	0	0	0	0	1	0	0	0	0	0	0	0	0
China_rumen1340	0	0	0	0	0	0	0	2	0	0	0	0	1	0	0	0	0	0	0	0	0	0	0	0	0	0	0	0	0	0	0	0	0	0	0	0	0	0	0	0	0	0	0	0	0	0	0	0	0
China_rumen1341	0	0	0	0	0	1	0	1	1	0	1	0	0	0	0	0	0	0	0	0	0	0	0	0	0	0	0	0	0	0	0	0	0	0	0	0	0	0	0	0	1	0	0	0	0	0	0	0	0
China_rumen1342	0	0	0	0	0	0	0	1	0	0	0	0	0	0	0	0	0	0	0	0	0	0	0	0	0	0	0	0	0	0	0	0	0	0	0	0	0	0	0	0	0	0	0	0	0	0	0	0	0
China_rumen1343	0	0	0	1	0	0	1	2	0	0	0	0	1	0	0	0	1	0	0	0	0	0	0	0	0	0	0	0	0	0	0	0	0	0	0	0	0	0	0	0	0	0	0	0	0	0	1	0	0
China_rumen1345	0	0	0	0	1	0	2	0	0	0	0	0	0	0	0	0	0	0	0	0	0	0	0	0	0	0	0	0	0	0	0	0	0	0	0	0	0	0	0	0	0	0	0	0	0	0	0	0	0
China_rumen1346	0	0	0	1	0	2	0	1	0	0	0	0	0	0	0	0	1	0	0	0	0	0	0	0	0	0	0	0	0	0	0	0	0	0	0	0	0	0	0	0	1	0	0	0	0	0	0	0	0
China_rumen1347	0	0	0	0	0	0	0	1	1	0	1	0	0	0	0	0	0	0	0	0	0	0	0	0	0	0	0	0	0	0	0	0	0	0	0	0	0	0	0	0	0	0	0	0	0	0	0	0	0
China_rumen1348	0	0	0	0	0	0	0	1	0	0	0	0	0	0	0	0	0	0	0	0	0	0	0	0	0	0	0	0	0	0	0	0	0	0	0	0	0	0	0	0	0	0	0	0	0	0	1	0	0
China_rumen1349	0	0	0	0	0	1	0	1	0	0	0	0	0	0	0	0	0	0	0	0	0	0	0	0	0	0	0	0	0	0	0	0	0	0	0	0	0	0	0	0	0	0	0	0	0	0	0	0	0
China_rumen135	0	0	0	1	0	0	0	0	0	0	0	0	0	0	0	0	0	0	0	0	0	0	0	0	0	0	0	0	0	0	0	0	0	0	0	0	0	0	0	0	0	0	0	0	0	0	0	0	0
China_rumen1350	0	0	0	0	0	1	0	1	0	0	0	0	1	0	1	0	0	0	0	0	0	0	0	0	0	0	0	0	0	0	0	0	0	0	0	0	0	0	0	0	0	0	0	0	0	0	0	0	0
China_rumen1351	0	0	0	0	0	2	1	1	0	0	0	0	0	0	1	0	0	0	0	0	0	0	0	0	0	0	0	0	0	0	0	0	0	0	0	0	0	0	0	0	0	0	0	0	0	0	0	0	0
China_rumen1352	0	0	0	0	0	1	0	1	0	0	0	0	0	0	0	0	0	0	0	0	0	0	0	0	0	0	0	0	0	0	0	0	0	0	0	0	0	0	0	0	1	0	0	0	0	0	0	0	0
China_rumen1353	0	0	0	0	0	0	0	1	1	0	0	0	0	0	0	0	0	0	0	0	0	0	0	0	0	0	0	0	0	0	0	0	0	0	0	0	0	0	0	0	0	0	0	0	0	0	0	0	0
China_rumen1354	0	1	0	0	0	0	0	0	0	0	0	0	1	0	0	0	0	0	0	0	0	0	0	0	0	0	0	0	0	0	0	0	0	0	0	0	0	0	0	0	0	0	0	0	0	0	0	0	0
China_rumen1355	0	0	0	1	0	1	0	1	0	0	1	0	0	0	0	1	0	0	0	0	0	0	0	0	0	0	0	0	0	0	0	0	0	0	0	0	0	0	0	0	1	0	0	0	0	0	0	0	0
China_rumen1356	0	0	0	0	0	0	0	0	0	0	0	0	0	0	0	0	0	0	0	0	0	0	0	0	0	0	0	0	0	0	2	0	0	0	0	0	0	0	0	0	0	0	0	1	0	0	0	0	0
China_rumen1357	0	0	0	0	0	0	0	0	0	0	0	0	0	0	0	0	0	0	0	0	0	0	0	0	0	0	0	0	0	0	1	0	0	0	0	0	0	0	0	0	0	0	0	3	0	0	0	0	0
China_rumen1358	0	0	0	0	0	2	1	0	1	0	0	0	0	0	0	0	0	0	0	0	0	0	0	0	0	0	0	0	0	0	0	0	0	0	0	0	0	0	0	0	0	0	0	0	0	0	0	0	0
China_rumen1359	0	0	0	0	0	1	1	1	2	0	0	0	0	0	0	0	0	0	0	0	0	0	0	0	0	0	0	0	0	0	0	0	0	0	0	0	0	0	0	0	0	0	0	0	0	0	0	0	0
China_rumen136	0	0	0	0	0	1	0	0	0	2	0	0	0	1	0	0	0	0	0	0	0	0	0	0	0	0	1	0	0	0	0	0	0	0	0	0	2	0	0	0	1	0	0	0	1	0	0	0	0
China_rumen1360	0	0	0	0	0	2	0	0	0	0	0	0	0	0	0	0	0	0	0	0	0	0	0	0	0	0	0	0	0	0	0	0	0	0	0	0	0	0	0	0	1	0	0	0	0	0	0	0	0
China_rumen1361	0	0	0	0	0	2	0	1	1	0	0	0	0	0	0	0	0	0	0	0	0	0	0	0	0	0	0	0	0	0	0	0	0	0	0	0	0	0	0	0	0	0	0	0	0	0	0	0	0
China_rumen1362	0	0	0	1	0	0	0	0	0	0	1	0	0	0	0	0	0	0	0	0	0	0	0	0	0	0	0	0	0	0	0	0	0	0	0	0	0	0	0	0	0	0	0	0	0	0	0	0	0
China_rumen1363	1	1	0	0	0	0	0	2	0	0	0	0	0	0	0	0	0	0	0	0	0	0	0	0	0	0	0	1	0	0	0	0	0	0	0	0	0	0	0	0	0	0	0	0	0	0	0	0	0
China_rumen1364	0	0	0	0	1	1	0	0	0	0	0	0	0	0	0	0	0	0	0	0	0	0	0	0	0	0	0	0	0	0	0	0	0	0	0	0	0	0	0	0	0	0	0	0	0	0	0	0	0
China_rumen1365	0	0	0	0	0	1	0	0	0	0	1	0	0	0	0	0	0	0	0	0	0	0	0	0	0	0	0	0	0	0	0	0	0	0	0	0	0	0	0	0	1	0	0	0	0	0	0	0	0
China_rumen1366	0	0	0	0	0	0	0	0	1	0	1	0	0	0	0	0	0	0	0	0	0	0	0	0	0	0	0	0	0	0	0	0	0	0	0	0	0	0	0	0	1	0	0	0	0	0	0	0	0
China_rumen1367	0	0	0	1	0	0	0	0	0	0	0	0	0	0	0	0	0	0	0	0	0	0	0	0	0	0	0	0	0	0	0	0	0	0	0	0	0	0	0	0	2	0	0	0	0	0	0	0	0
China_rumen1368	0	0	0	0	0	1	1	1	0	0	0	0	0	0	0	0	0	0	0	0	0	0	0	0	0	0	0	0	0	0	0	0	0	0	0	0	0	0	0	0	0	0	0	0	0	0	0	0	0
China_rumen1369	1	1	0	0	0	0	0	0	0	0	1	0	0	0	0	0	0	0	0	0	0	0	0	0	0	0	0	0	0	0	0	0	0	0	0	0	0	0	0	0	3	0	0	0	1	1	0	1	0
China_rumen137	0	0	0	0	0	2	0	0	1	0	0	0	0	0	0	0	0	0	0	0	0	0	0	0	0	0	0	0	0	0	0	0	0	0	0	0	0	0	0	0	0	0	0	0	0	0	0	0	0
China_rumen1370	0	0	0	0	1	1	0	0	0	0	0	0	0	0	0	0	0	0	0	0	0	0	0	0	0	0	0	0	0	0	0	0	0	0	0	0	0	0	0	0	0	0	0	0	0	0	0	0	0
China_rumen1371	0	1	0	0	1	1	0	1	0	0	0	0	0	0	0	0	0	0	0	0	0	0	0	0	0	0	0	0	0	0	0	0	0	0	0	0	0	0	0	0	0	0	0	0	0	0	0	0	0
China_rumen1372	0	0	0	0	0	0	0	0	0	0	0	0	0	0	0	0	0	0	0	0	0	0	0	0	0	0	0	0	0	0	0	0	0	0	0	0	0	0	0	0	0	0	0	0	0	0	0	0	0
China_rumen1373	0	0	0	2	0	1	0	2	0	0	1	0	0	0	0	0	1	0	0	0	0	0	0	0	0	0	0	0	0	0	0	0	0	0	0	0	0	0	0	0	1	0	0	0	0	0	0	0	0
China_rumen1374	0	0	0	0	0	1	0	0	0	0	0	0	0	0	1	0	0	0	0	0	0	0	0	0	0	0	0	0	0	0	0	0	0	0	0	0	0	0	0	0	0	0	0	0	0	0	0	0	0
China_rumen1375	0	0	0	0	0	0	0	0	0	0	0	0	0	0	0	0	0	1	0	0	0	0	0	0	0	0	0	0	0	0	0	0	0	0	0	0	0	0	0	0	0	0	0	0	0	0	0	0	0
China_rumen1376	0	0	0	0	0	0	0	1	0	0	0	0	2	0	0	0	0	0	0	0	0	0	0	0	0	0	0	1	0	0	0	0	0	0	0	0	0	0	0	0	0	0	0	0	0	0	0	0	0
China_rumen1377	0	0	0	0	0	0	1	0	0	0	0	0	1	0	0	0	1	0	0	0	0	0	0	0	0	0	0	0	0	0	0	0	0	0	0	0	0	0	0	0	0	0	0	0	0	0	0	0	0
China_rumen1378	0	0	0	1	0	0	0	0	0	0	0	0	0	0	0	0	0	0	0	0	0	0	0	0	0	0	0	0	0	0	0	0	0	0	0	0	0	0	0	0	0	0	0	0	0	0	0	0	0
China_rumen1379	0	0	0	0	0	0	0	0	0	0	0	0	0	0	0	1	0	0	0	0	0	0	0	0	0	0	0	0	0	0	0	0	0	0	0	0	0	0	0	0	0	0	0	0	0	0	0	0	0
China_rumen1380	1	1	0	1	0	1	0	1	0	0	1	0	1	0	0	0	0	0	0	0	0	0	0	0	0	0	0	0	0	0	0	0	0	0	0	0	0	0	0	0	1	0	0	0	0	0	0	0	0
China_rumen1381	0	0	0	0	0	0	0	1	0	0	0	0	0	0	0	0	1	0	0	0	0	0	0	0	0	0	0	0	0	0	0	0	0	0	0	0	0	0	0	0	1	0	0	0	0	0	0	0	0
China_rumen1382	0	0	0	0	0	2	0	0	0	0	1	0	0	0	1	0	0	0	0	0	0	0	0	0	0	0	0	0	0	0	0	0	0	0	0	0	0	0	0	0	1	0	0	0	0	0	0	0	0
China_rumen1383	0	0	0	1	0	0	0	2	0	0	1	0	0	0	0	0	0	0	0	0	0	0	0	0	0	0	0	0	0	0	0	0	0	0	0	0	0	0	0	0	3	0	0	0	0	0	0	0	0
China_rumen1384	0	0	0	0	1	0	0	0	1	0	0	0	0	0	0	0	0	0	0	0	0	0	0	0	0	0	0	0	0	0	0	0	0	0	0	0	0	0	0	0	0	0	0	0	0	0	0	0	0
China_rumen1385	0	0	1	0	1	1	1	1	0	0	0	0	0	0	0	0	0	0	0	0	0	0	0	0	0	0	0	0	0	0	0	0	0	0	0	0	0	0	0	0	0	0	0	0	0	0	0	0	0
China_rumen1386	0	0	0	0	0	0	0	2	0	0	0	0	1	0	0	0	1	0	0	0	0	0	0	0	0	0	0	0	0	0	0	0	0	0	0	0	0	0	0	0	0	0	0	0	0	0	1	0	0
China_rumen1387	0	0	0	0	0	1	0	1	0	0	2	0	1	0	0	0	0	1	0	0	0	0	0	0	0	1	0	0	0	0	0	0	0	0	0	0	0	0	0	0	2	0	0	0	0	0	0	0	0
China_rumen1388	0	0	0	0	0	1	0	0	0	0	1	0	0	0	0	0	0	0	0	0	0	0	0	0	0	0	0	0	0	0	0	0	0	0	0	0	0	0	0	0	1	0	0	0	1	1	0	1	0
China_rumen1389	0	0	0	0	0	2	0	0	0	0	1	0	0	0	0	0	0	0	0	0	0	0	0	0	0	0	0	0	0	0	0	0	0	0	0	0	0	0	0	0	2	0	0	0	0	0	0	0	0
China_rumen1390	0	0	0	0	0	2	0	1	0	0	1	0	0	0	0	0	0	0	0	0	0	0	0	0	0	0	0	0	0	0	0	0	0	0	0	0	0	0	0	0	1	0	0	0	0	0	0	0	0
China_rumen1391	0	0	0	0	0	1	0	0	0	0	0	0	1	0	0	0	0	0	0	0	0	0	0	0	0	0	0	0	0	0	0	0	0	0	0	0	0	0	0	0	0	0	0	0	0	0	0	0	0
China_rumen1392	0	0	0	0	0	2	1	1	2	0	0	0	0	0	0	0	0	0	0	0	0	0	0	0	0	0	0	0	0	0	0	0	0	0	0	0	0	0	0	0	0	0	0	0	0	0	0	0	0
China_rumen1393	0	0	0	1	0	0	0	0	0	0	1	0	0	0	0	0	0	0	0	0	0	0	0	0	0	0	0	0	0	0	0	0	0	0	0	0	0	0	0	0	1	0	0	0	0	0	0	0	0
China_rumen1394	0	0	0	0	0	1	0	0	1	0	0	0	0	0	0	0	0	0	0	0	0	0	0	0	0	0	0	0	0	0	0	0	0	0	0	0	0	0	0	0	0	0	0	0	0	0	0	0	0
China_rumen1395	0	0	0	0	0	0	0	2	0	0	0	0	0	0	0	0	0	0	0	0	0	0	0	0	0	0	0	1	0	0	0	0	0	0	0	0	0	0	0	0	0	0	0	0	2	2	0	2	0
China_rumen1396	0	0	0	0	1	1	0	0	1	0	0	0	0	0	0	0	0	0	0	0	0	0	0	0	0	0	0	0	0	0	0	0	0	0	0	0	0	0	0	0	0	0	0	0	0	0	0	0	0
China_rumen1398	0	0	0	0	0	0	0	0	0	0	1	0	0	0	0	0	0	0	0	0	0	0	0	0	0	0	0	0	0	0	0	0	0	0	0	0	0	0	0	0	0	0	0	0	0	0	0	0	0
China_rumen1399	0	0	0	1	0	1	0	0	0	0	1	0	0	0	0	0	0	0	0	0	0	0	0	0	0	0	0	0	0	0	0	0	0	0	0	0	0	0	0	0	1	0	0	0	0	0	0	0	0
China_rumen14	0	0	0	0	0	0	0	1	0	0	0	0	0	0	0	0	0	0	0	0	0	0	0	0	0	0	0	0	0	0	0	0	0	0	0	0	0	0	0	0	1	0	0	0	0	0	0	0	0
China_rumen140	0	0	0	0	1	0	0	0	2	0	0	0	0	0	0	0	0	0	0	0	0	0	0	0	0	0	0	0	0	0	0	0	0	0	0	0	0	0	0	0	0	0	0	0	0	0	0	0	0
China_rumen1400	0	0	1	0	0	1	0	0	0	0	1	0	1	0	0	0	1	0	0	0	0	0	0	0	0	0	0	0	0	0	0	0	0	0	0	0	0	0	0	0	1	0	0	0	0	0	0	0	0
China_rumen1401	0	0	0	0	0	0	0	1	0	0	1	0	1	0	0	1	0	0	0	0	0	0	0	0	0	0	0	0	0	0	0	0	0	0	0	0	0	0	0	0	2	0	0	0	0	0	0	0	0
China_rumen1402	0	0	0	1	0	1	1	2	0	0	1	0	0	0	0	0	0	0	0	0	0	0	0	0	0	0	0	0	0	0	0	0	0	0	0	0	0	0	0	0	1	0	0	0	0	0	0	0	0
China_rumen1403	1	1	0	0	0	1	0	1	0	0	1	0	0	0	0	0	0	0	0	0	0	0	0	0	0	0	0	0	0	0	0	0	0	0	0	0	0	0	0	0	1	0	0	0	0	0	0	0	0
China_rumen1404	0	0	0	0	0	0	0	1	0	0	1	0	0	0	0	0	0	0	0	0	0	0	0	0	0	0	0	0	0	0	0	0	0	0	0	0	0	0	0	0	0	0	0	0	0	0	0	0	0
China_rumen1405	0	0	0	0	0	1	0	1	0	0	1	0	0	0	0	0	0	0	0	0	0	0	0	0	0	0	0	0	0	0	0	0	0	0	0	0	0	0	0	0	1	0	0	0	0	0	0	0	0
China_rumen1406	0	0	0	0	0	0	0	0	1	0	0	0	0	0	0	0	0	0	0	0	0	0	0	0	0	0	0	0	0	0	0	0	0	0	0	0	0	0	0	0	0	0	0	0	0	0	0	0	0
China_rumen1407	0	0	0	0	0	1	0	1	0	0	1	0	1	0	0	0	0	0	0	0	0	0	0	0	0	0	0	0	0	0	0	0	0	0	0	0	0	0	0	0	1	0	0	0	0	0	0	0	0
China_rumen1408	0	0	0	0	0	1	0	1	0	0	0	0	0	0	0	0	0	0	0	0	0	0	0	0	0	0	0	0	0	0	0	0	0	0	0	0	0	0	0	0	1	0	0	0	0	0	0	0	0
China_rumen1409	0	0	0	0	0	2	0	0	0	0	1	0	0	0	1	0	0	0	0	0	0	0	0	0	0	0	0	0	0	0	0	0	0	0	0	0	0	0	0	0	1	0	0	0	0	0	0	0	0
China_rumen1410	0	0	1	0	0	2	0	0	0	0	0	0	1	0	0	0	1	0	0	0	0	0	0	0	0	0	0	0	0	0	0	0	0	0	0	0	0	0	0	0	0	0	0	0	0	0	0	0	0
China_rumen1411	0	0	0	0	0	0	0	0	0	0	1	0	0	0	0	0	0	0	0	0	0	0	0	0	0	0	0	0	0	0	0	0	0	0	0	0	0	0	0	0	1	0	0	0	0	0	0	0	0
China_rumen1412	0	0	0	0	0	2	0	0	0	0	1	0	0	0	0	0	0	0	0	0	0	0	0	0	0	0	0	0	0	0	0	0	0	0	0	0	0	0	0	0	2	0	0	0	0	0	0	0	0
China_rumen1413	1	1	0	0	0	1	0	1	0	0	0	0	0	0	0	0	0	0	0	0	0	0	0	0	0	0	0	0	0	0	0	0	0	0	0	0	0	0	0	0	0	0	0	0	0	0	0	0	0
China_rumen1414	0	0	0	0	0	1	1	1	0	0	0	0	0	0	0	0	0	0	0	0	0	0	0	0	0	0	0	0	0	0	0	0	0	0	0	0	0	0	0	0	0	0	0	0	0	0	0	0	0
China_rumen1415	0	0	0	0	0	1	0	0	1	0	0	0	0	0	0	0	0	0	0	0	0	0	0	0	0	0	0	0	0	0	0	0	0	0	0	0	0	0	0	0	0	0	0	0	0	0	0	0	0
China_rumen1416	0	0	0	0	0	0	0	0	1	0	1	0	1	0	1	0	0	0	0	0	0	0	0	0	0	0	0	0	0	0	0	0	0	0	0	0	0	0	0	0	1	0	0	0	0	0	0	0	0
China_rumen1417	1	1	0	0	0	1	0	1	0	0	1	0	0	0	0	0	1	0	0	0	0	0	0	0	0	0	0	0	0	0	0	0	0	0	0	0	0	0	0	0	1	0	0	0	0	0	0	0	0
China_rumen1418	0	0	0	0	0	0	0	0	0	0	0	0	0	0	0	0	0	0	0	0	0	0	0	1	0	0	0	0	0	0	0	0	0	0	0	0	0	0	0	0	0	0	0	0	0	0	0	0	0
China_rumen1419	0	0	0	0	0	0	0	0	0	0	1	0	0	0	1	0	0	0	0	0	0	0	0	0	0	0	0	0	0	0	0	0	0	0	0	0	0	0	0	0	2	0	0	0	0	0	0	0	0
China_rumen142	0	0	0	1	0	1	1	2	0	0	1	0	0	0	0	0	0	0	0	0	0	0	0	0	0	0	0	0	0	0	0	0	0	0	0	0	0	0	0	0	0	0	0	0	0	0	0	0	0
China_rumen1420	1	1	0	0	0	1	1	2	0	0	0	0	1	0	1	0	0	0	0	0	0	0	0	0	0	0	0	0	0	0	0	0	0	0	0	0	0	0	0	0	0	0	0	0	0	0	0	0	0
China_rumen1421	0	0	0	0	0	0	0	1	0	0	0	0	0	0	0	0	0	0	0	0	0	0	0	0	0	0	0	0	0	0	0	0	0	0	0	0	0	0	0	0	0	0	0	0	1	1	0	2	0
China_rumen1422	0	0	0	0	1	0	0	1	0	0	0	0	0	0	0	0	0	0	0	0	0	0	0	0	0	1	0	0	0	0	0	0	0	0	0	0	0	0	0	0	1	0	0	0	0	0	0	0	0
China_rumen1423	0	0	0	0	0	0	0	0	1	0	0	0	0	0	0	0	0	0	0	0	0	0	0	0	0	0	0	0	0	0	0	0	0	0	0	0	0	0	0	0	0	0	0	0	0	0	0	0	0
China_rumen1424	0	0	0	0	0	1	0	0	0	0	0	0	0	0	1	0	0	0	0	0	0	0	0	0	0	0	0	0	0	0	0	0	0	0	0	0	0	0	0	0	1	0	0	0	0	0	0	0	0
China_rumen1425	0	0	0	0	0	1	0	0	0	0	1	0	0	0	0	0	0	0	0	0	0	0	0	0	0	0	0	0	0	0	0	0	0	0	0	0	0	0	0	0	1	0	0	0	0	0	0	0	0
China_rumen1426	0	1	0	0	0	1	0	2	0	0	1	0	1	0	0	0	0	0	0	0	0	0	0	0	0	0	0	0	0	0	0	0	0	0	0	0	0	0	0	0	1	0	0	0	0	0	0	0	0
China_rumen1427	0	0	0	0	0	2	0	0	0	0	0	0	0	0	0	0	0	0	0	0	0	0	0	0	0	0	0	0	0	0	0	0	0	0	0	0	0	0	0	0	1	0	0	0	0	0	0	0	0
China_rumen1428	0	0	0	0	0	1	0	1	0	0	0	0	0	0	0	0	0	0	0	0	0	0	0	0	0	0	0	0	0	0	0	0	0	0	0	0	0	0	0	0	0	0	0	0	0	0	0	0	0
China_rumen1429	0	0	0	0	0	1	0	1	0	0	1	0	0	0	0	0	0	0	0	0	0	0	0	0	0	0	0	0	0	0	0	0	0	0	0	0	0	0	0	0	2	0	0	0	0	0	0	0	0
China_rumen143	0	0	0	0	0	2	0	1	0	0	0	0	0	0	0	0	0	0	0	0	0	0	0	0	0	0	0	0	0	0	0	0	0	0	0	0	0	0	0	0	0	0	0	0	0	0	0	0	0
China_rumen1430	0	0	0	0	0	2	0	0	0	0	1	0	0	0	0	0	0	0	0	0	0	0	0	0	0	0	0	0	0	0	0	0	0	0	0	0	0	0	0	0	2	0	0	0	0	0	0	0	0
China_rumen1431	0	0	0	0	0	0	0	1	1	0	0	0	0	0	0	0	0	0	0	0	0	0	0	0	0	0	0	0	0	0	0	0	0	0	0	0	0	0	0	0	0	0	0	0	0	0	0	0	0
China_rumen1432	0	0	0	0	0	2	0	0	0	0	1	0	0	0	0	0	1	0	0	0	0	0	0	0	0	0	0	0	0	0	0	0	0	0	0	0	0	0	0	0	2	0	0	0	0	0	0	0	0
China_rumen1433	0	0	0	0	0	1	1	1	0	0	0	0	0	0	0	0	0	0	0	0	0	0	0	0	0	0	0	0	0	0	0	0	0	0	0	0	0	0	0	0	0	0	0	0	0	0	0	0	0
China_rumen1434	0	0	0	0	0	0	0	0	0	0	0	0	0	0	0	0	0	0	0	0	0	0	0	0	0	0	0	2	0	0	0	0	0	0	0	0	0	0	0	0	0	0	0	0	0	0	0	0	0
China_rumen1435	0	0	0	0	0	1	0	1	0	0	0	0	0	0	0	0	0	0	0	0	0	0	0	0	0	1	0	0	0	0	0	0	0	0	0	0	0	0	0	0	0	0	0	0	0	0	0	0	0
China_rumen1436	0	0	0	0	0	1	0	0	0	0	1	0	0	0	1	0	0	0	0	0	0	0	0	0	0	0	0	0	0	0	0	0	0	0	0	0	0	0	0	0	2	0	0	0	0	0	0	0	0
China_rumen1437	0	0	0	0	0	1	1	1	1	0	1	0	0	0	0	0	0	0	0	0	0	0	0	0	0	0	0	0	0	0	0	0	0	0	0	0	0	0	0	0	2	0	0	0	0	0	0	0	0
China_rumen1438	0	0	0	0	0	1	0	2	0	0	1	0	1	0	0	1	0	0	0	0	0	0	0	0	0	0	0	0	0	0	0	0	0	0	0	0	0	0	0	0	1	0	0	0	0	0	0	0	0
China_rumen1439	1	1	0	0	0	2	0	1	2	0	1	0	0	0	0	0	0	0	0	0	0	0	0	0	0	0	0	0	0	0	0	0	0	0	0	0	0	0	0	0	1	0	0	0	0	0	0	0	0
China_rumen1440	0	0	0	0	0	1	0	0	0	0	0	0	0	0	1	0	0	0	0	0	0	0	0	0	0	0	0	0	0	0	0	0	0	0	0	0	0	0	0	0	1	0	0	0	0	0	0	1	0
China_rumen1441	0	0	0	0	0	1	1	1	0	0	1	0	0	0	0	0	0	0	0	0	0	0	0	0	0	0	0	0	0	0	0	0	0	0	0	0	0	0	0	0	0	0	0	0	0	0	0	0	0
China_rumen1442	1	1	0	0	1	1	0	1	1	0	1	0	1	0	0	0	0	0	0	0	0	0	0	0	0	0	0	0	0	0	0	0	0	0	0	0	0	0	0	0	1	0	0	0	0	0	0	0	0
China_rumen1443	0	0	0	0	0	1	0	0	0	0	1	0	0	0	0	0	0	0	0	0	0	0	0	0	0	0	0	0	0	0	0	0	0	0	0	0	0	0	0	0	2	0	0	0	0	0	0	0	0
China_rumen1444	0	0	0	0	1	0	1	1	0	0	1	0	0	0	0	0	0	0	0	0	0	0	0	0	0	0	0	0	0	0	0	0	0	0	0	0	0	0	0	0	1	0	0	0	1	1	0	0	0
China_rumen1445	0	0	0	1	0	1	1	2	0	0	0	0	0	0	0	0	0	0	0	0	0	0	0	0	0	0	0	0	0	0	0	0	0	0	0	0	0	0	0	0	0	0	0	0	0	0	0	0	0
China_rumen1446	0	0	0	0	0	2	0	1	0	0	1	0	0	0	0	0	0	0	0	0	0	0	0	0	0	0	0	0	0	0	0	0	0	0	0	0	0	0	0	0	2	0	0	0	0	0	0	0	0
China_rumen1447	0	0	0	0	0	2	0	0	0	0	1	0	0	0	1	0	0	0	0	0	0	0	0	0	0	0	0	0	0	0	0	0	0	0	0	0	0	0	0	0	1	0	0	0	0	0	0	0	0
China_rumen1448	0	0	0	0	0	0	0	2	0	0	0	0	0	0	0	0	0	0	0	0	0	0	0	0	0	0	0	0	0	0	0	0	0	0	0	0	0	0	0	0	0	0	0	0	0	0	0	0	0
China_rumen1449	0	0	0	1	0	0	0	0	0	0	0	0	0	0	0	0	0	0	0	0	0	0	0	0	0	0	0	0	0	0	0	0	0	0	0	0	0	0	0	0	0	0	0	0	0	0	0	0	0
China_rumen145	0	0	0	0	0	3	0	0	1	0	1	0	0	0	0	0	0	0	0	0	0	0	0	0	0	0	0	0	0	0	0	0	0	0	0	0	0	0	0	0	1	0	0	0	0	0	0	0	0
China_rumen1450	0	1	0	0	0	1	1	2	0	0	1	0	0	0	0	0	1	0	0	0	0	0	0	0	0	0	0	0	0	0	0	0	0	0	0	0	0	0	0	0	1	0	0	0	0	0	1	0	0
China_rumen1451	0	0	0	1	0	0	0	0	0	0	0	0	0	0	0	0	0	0	0	0	0	0	0	0	0	0	0	0	0	0	0	0	0	0	0	0	0	0	0	0	0	0	0	0	0	0	0	0	0
China_rumen1452	0	0	0	0	0	1	0	0	1	0	1	0	0	0	0	0	0	0	0	0	0	0	0	0	0	0	0	0	0	0	0	0	0	0	0	0	0	0	0	0	1	0	0	0	0	0	0	0	0
China_rumen1453	0	0	1	0	0	0	0	0	1	0	0	0	0	0	0	0	0	0	0	0	0	0	0	0	0	0	0	0	0	0	0	0	0	0	0	0	0	0	0	0	0	0	0	0	0	0	0	0	0
China_rumen1454	0	1	0	0	0	1	0	2	0	0	0	0	1	0	0	0	1	0	0	0	0	0	0	0	0	0	0	0	0	0	0	0	0	0	0	0	0	0	0	0	0	0	0	0	0	0	0	0	0
China_rumen1455	1	1	0	0	0	1	0	1	0	0	1	0	0	0	0	0	0	0	0	0	0	0	0	0	0	0	0	1	0	0	0	0	0	0	0	0	0	0	0	0	1	0	0	0	0	0	0	0	0
China_rumen1456	0	0	0	0	1	1	1	2	1	0	0	0	0	0	0	0	0	0	0	0	0	0	0	0	0	0	0	0	0	0	0	0	0	0	0	0	0	0	0	0	0	0	0	0	0	0	0	0	0
China_rumen1457	0	0	0	0	0	0	0	0	0	0	0	0	0	0	0	0	0	0	0	0	0	0	0	0	0	0	0	0	0	0	0	0	0	0	0	0	0	0	0	0	0	0	0	0	0	0	0	0	0
China_rumen1458	0	0	0	0	0	1	1	1	0	0	0	0	0	0	0	0	0	0	0	0	0	0	0	0	0	0	0	0	0	0	0	0	0	0	0	0	0	0	0	0	0	0	0	0	0	0	0	0	0
China_rumen1459	0	0	0	0	1	2	0	1	0	0	0	0	0	0	0	0	0	0	0	0	0	0	0	0	0	0	0	0	0	0	0	0	0	0	0	0	0	0	0	0	0	0	0	0	0	0	0	0	0
China_rumen146	1	0	0	0	0	0	0	0	1	0	0	0	0	0	0	0	0	0	0	0	0	0	0	0	0	0	0	0	0	0	0	0	0	0	0	0	0	0	0	0	0	0	0	0	0	0	0	0	0
China_rumen1460	0	0	0	0	0	0	0	1	0	0	0	0	1	0	0	0	0	0	0	0	0	0	0	0	0	0	0	0	0	0	0	0	0	0	0	0	0	0	0	0	0	0	0	0	0	0	0	0	0
China_rumen1462	0	0	0	0	0	1	0	1	0	0	0	0	1	0	0	0	2	0	0	0	0	0	0	0	0	0	0	0	0	0	0	0	0	0	0	0	0	0	0	0	0	0	0	0	0	0	0	0	0
China_rumen1463	0	0	0	0	0	2	0	1	1	0	0	0	0	0	0	0	0	0	0	0	0	0	0	0	0	0	0	0	0	0	0	0	0	0	0	0	0	0	0	0	0	0	0	0	0	0	0	0	0
China_rumen1464	1	1	0	1	0	1	1	2	0	0	2	0	1	0	0	0	0	0	0	0	0	0	0	0	0	0	0	0	0	0	0	0	0	0	0	0	0	0	0	0	1	0	0	0	0	0	0	0	0
China_rumen1465	2	1	0	0	0	1	0	1	1	0	1	0	0	0	0	0	0	0	0	0	0	0	0	0	0	0	0	0	0	0	0	0	0	0	0	0	0	0	0	0	1	0	0	0	0	0	0	0	0
China_rumen1466	0	0	0	0	0	1	0	1	0	0	0	0	0	0	0	1	0	0	0	0	0	0	0	0	0	0	0	0	0	0	0	0	0	0	0	0	0	0	0	0	1	0	0	0	0	0	0	0	0
China_rumen1467	0	0	0	1	0	1	1	2	0	0	1	0	0	0	1	0	0	0	0	0	0	0	0	0	0	0	0	0	0	0	0	0	0	0	0	0	0	0	0	0	2	0	0	0	0	0	0	0	0
China_rumen1468	0	0	0	0	1	1	0	0	0	1	2	0	0	0	0	0	0	0	0	0	0	0	0	0	0	0	0	0	0	0	0	0	0	0	0	0	0	0	0	0	1	0	0	0	0	0	0	0	0
China_rumen1469	0	0	0	0	0	1	0	1	0	0	1	0	0	0	0	0	1	0	0	0	0	0	0	0	0	0	0	0	0	0	0	0	0	0	0	0	0	0	0	0	1	0	0	0	0	0	0	0	0
China_rumen147	1	0	0	0	0	0	0	0	0	1	0	0	0	0	0	0	0	0	0	0	0	0	0	0	0	0	0	0	0	0	0	0	0	0	0	0	0	0	0	0	0	0	0	0	0	0	0	0	0
China_rumen1470	0	0	0	0	0	1	1	1	1	0	0	0	0	0	0	0	0	0	0	0	0	0	0	0	0	0	0	0	0	0	0	0	0	0	0	0	0	0	0	0	0	0	0	0	0	0	0	0	0
China_rumen1471	0	0	0	1	0	0	0	1	0	0	2	0	0	0	0	0	0	0	0	0	0	0	0	0	0	0	0	0	0	0	0	0	0	0	0	0	0	0	0	0	1	0	0	0	0	0	0	0	0
China_rumen1472	0	0	0	0	0	1	0	1	0	0	1	0	0	0	0	0	0	0	0	0	0	0	0	0	0	0	0	0	0	0	0	0	0	0	0	0	0	0	0	0	2	0	0	0	0	0	0	0	0
China_rumen1473	0	0	0	0	0	2	0	1	0	0	1	0	0	0	0	0	1	0	0	0	0	0	0	0	0	0	0	0	0	0	0	0	0	0	0	0	0	0	0	0	2	0	0	0	0	0	0	0	0
China_rumen1474	0	0	0	0	0	1	0	1	1	0	0	0	0	0	0	0	0	0	0	0	0	0	0	0	0	0	0	0	0	0	0	0	0	0	0	0	0	0	0	0	0	0	0	0	0	0	0	0	0
China_rumen1475	0	0	0	0	0	0	0	0	0	0	0	0	0	1	0	1	0	0	0	0	0	0	0	0	0	0	0	0	0	0	0	0	0	0	0	0	0	0	0	0	1	0	0	0	0	0	0	0	0
China_rumen1477	1	0	0	0	0	1	0	1	0	0	1	0	0	0	0	1	0	0	0	0	0	0	0	0	0	0	0	0	0	0	0	0	0	0	0	0	0	0	0	0	1	0	0	0	0	0	0	0	0
China_rumen1478	0	0	0	0	0	0	1	2	0	0	0	0	0	0	0	0	1	0	0	0	0	0	0	0	0	1	0	0	0	0	0	0	0	0	0	0	0	0	0	0	0	0	0	0	0	0	1	0	0
China_rumen1479	0	0	0	0	0	1	1	1	0	0	1	0	0	0	0	1	0	0	0	0	0	0	0	0	0	0	0	0	0	0	0	0	0	0	0	0	0	0	0	0	2	0	0	0	0	0	0	0	0
China_rumen148	0	0	0	0	0	1	0	1	1	0	0	0	0	0	0	0	0	0	0	0	0	0	0	0	0	0	0	0	0	0	0	0	0	0	0	0	0	0	0	0	0	0	0	0	0	0	0	0	0
China_rumen1480	1	1	0	0	0	0	0	0	0	0	1	0	0	0	1	0	0	0	0	0	0	0	0	0	0	0	0	0	0	0	0	0	0	0	0	0	0	0	0	0	2	0	0	0	0	0	0	0	0
China_rumen1481	0	0	0	1	0	0	1	2	0	0	0	0	1	0	1	0	0	0	0	0	0	0	0	0	0	0	0	0	0	0	0	0	0	0	0	0	0	0	0	0	0	0	0	0	0	0	1	0	0
China_rumen1482	0	0	0	0	0	1	0	0	1	0	0	0	0	0	0	0	0	0	0	0	0	0	0	0	0	0	0	0	0	0	0	0	0	0	0	0	0	0	0	0	0	0	0	0	0	0	0	0	0
China_rumen1483	0	0	0	0	0	2	0	1	0	1	0	0	0	0	0	0	0	0	0	0	0	0	0	0	0	0	0	0	0	0	0	0	0	0	0	0	0	0	0	0	0	0	0	0	0	0	0	0	0
China_rumen1484	0	0	0	0	0	1	0	1	1	0	1	0	0	0	0	0	0	0	0	0	0	0	0	0	0	0	0	0	0	0	0	0	0	0	0	0	0	0	0	0	1	0	0	0	0	0	0	0	0
China_rumen1485	0	0	0	1	0	0	0	0	0	0	0	0	0	0	0	0	0	0	0	0	0	0	0	0	0	0	0	0	0	0	0	0	0	0	0	0	0	0	0	0	0	0	0	0	0	0	0	0	0
China_rumen1486	0	0	0	1	0	1	0	1	0	0	1	0	0	0	0	0	0	0	0	0	0	0	0	0	0	0	0	0	0	0	0	0	0	0	0	0	0	0	0	0	1	0	0	0	0	0	0	0	0
China_rumen1487	0	0	0	0	0	1	1	1	1	0	0	0	0	0	0	0	0	0	0	0	0	0	0	0	0	0	0	0	0	0	0	0	0	0	0	0	0	0	0	0	0	0	0	0	0	0	0	0	0
China_rumen1488	0	0	0	0	0	0	0	1	0	0	0	0	0	0	0	0	0	0	0	0	0	0	0	0	0	0	0	1	0	0	0	0	0	0	0	0	0	0	0	0	0	0	0	0	0	0	0	0	0
China_rumen1489	0	0	0	0	0	1	0	0	0	0	1	0	1	0	0	0	0	0	0	0	0	0	0	0	0	0	0	0	0	0	0	0	0	0	0	0	0	0	0	0	1	0	0	0	0	0	0	0	0
China_rumen149	0	0	0	0	0	1	0	1	0	0	1	0	0	0	0	0	0	0	0	0	0	0	0	0	0	0	0	0	0	0	0	0	0	0	0	0	0	0	0	0	2	0	0	0	0	0	0	0	0
China_rumen1490	0	0	0	0	0	2	0	1	0	0	1	0	1	0	0	0	0	0	0	0	0	0	0	0	0	0	0	0	0	0	0	0	0	0	0	0	0	0	0	0	1	0	0	0	0	0	0	0	0
China_rumen1491	0	0	0	1	0	1	1	1	0	0	1	0	0	0	1	1	0	0	0	0	0	0	0	0	0	0	0	0	0	0	0	0	0	0	0	0	0	0	0	0	1	0	0	0	1	1	0	2	0
China_rumen1492	0	0	0	1	0	1	1	2	0	0	0	0	0	0	0	0	0	0	0	0	0	0	0	0	0	0	0	0	0	0	0	0	0	0	0	0	0	0	0	0	0	0	0	0	0	0	0	0	0
China_rumen1493	0	0	0	0	0	1	0	1	0	0	1	0	0	0	0	0	0	0	0	0	0	0	0	0	0	0	0	0	0	0	0	0	0	0	0	0	0	0	0	0	1	0	0	0	0	0	0	0	0
China_rumen1494	0	0	0	0	0	1	0	0	0	0	0	0	0	0	0	0	0	0	0	0	0	0	0	0	0	0	0	0	0	0	0	0	0	0	0	0	0	0	0	0	0	0	0	0	0	0	0	0	0
China_rumen1495	0	0	0	0	0	1	0	1	0	0	1	0	0	0	0	0	0	0	0	0	0	0	0	0	0	0	0	0	0	0	0	0	0	0	0	0	0	0	0	0	0	0	0	0	0	0	0	0	0
China_rumen1496	0	0	0	0	0	2	1	1	1	0	0	0	1	0	0	0	0	0	0	0	0	0	0	0	0	0	0	0	0	0	0	0	0	0	0	0	0	0	0	0	0	0	0	0	0	0	0	0	0
China_rumen1497	0	0	0	0	0	1	1	2	0	0	1	0	0	0	0	1	0	0	0	0	0	0	0	0	0	0	0	0	0	0	0	0	0	0	0	0	0	0	0	0	1	0	0	0	0	0	0	0	0
China_rumen1498	0	0	0	0	0	2	1	1	1	0	0	0	0	0	0	0	0	0	0	0	0	0	0	0	0	0	0	0	0	0	0	0	0	0	0	0	0	0	0	0	0	0	0	0	0	0	0	0	0
China_rumen1499	0	0	0	0	0	0	0	1	0	0	1	0	0	0	0	0	0	0	0	0	0	0	0	0	0	0	0	0	0	0	0	0	0	0	0	0	0	0	0	0	1	0	0	0	0	0	0	0	0
China_rumen150	1	1	0	0	0	0	0	1	1	0	1	0	0	0	0	0	0	0	0	0	0	0	0	0	0	0	0	0	0	0	0	0	0	0	0	0	0	0	0	0	1	0	0	0	0	0	0	0	0
China_rumen1500	0	0	0	0	0	0	0	0	0	0	1	0	0	0	1	0	0	0	0	0	0	0	0	0	0	0	0	0	0	0	0	0	0	0	0	0	0	0	0	0	1	0	0	0	0	0	0	0	0
China_rumen1501	0	0	0	0	0	2	0	1	1	0	0	0	0	0	0	0	0	0	0	0	0	0	0	0	0	0	0	0	0	0	0	0	0	0	0	0	0	0	0	0	0	0	0	0	0	0	0	0	0
China_rumen1502	0	0	0	1	0	0	1	2	0	0	0	0	1	0	0	0	0	0	0	0	0	0	0	0	0	0	0	0	0	0	0	0	0	0	0	0	0	0	0	0	0	0	0	0	0	0	0	0	0
China_rumen1503	0	1	0	0	0	0	1	2	0	0	1	0	1	0	0	0	0	0	0	0	0	0	0	0	0	1	0	0	0	0	0	0	0	0	0	0	0	0	0	0	1	0	0	0	0	0	0	0	0
China_rumen1504	0	0	0	0	0	1	1	2	0	0	1	0	0	0	0	1	1	0	0	0	0	0	0	0	0	0	0	0	0	0	0	0	0	0	0	0	0	0	0	0	1	0	0	0	0	0	0	0	0
China_rumen1505	0	0	0	0	0	1	1	2	1	0	0	0	0	0	0	0	0	0	0	0	0	0	0	0	0	0	0	0	0	0	0	0	0	0	0	0	0	0	0	0	0	0	0	0	0	0	0	0	0
China_rumen1506	0	0	0	0	0	2	0	0	0	0	1	0	0	0	1	0	0	0	0	0	0	0	0	0	0	0	0	0	0	0	0	0	0	0	0	0	0	0	0	0	1	0	0	0	0	0	0	0	0
China_rumen1507	0	0	0	0	0	1	1	2	0	0	1	0	0	0	0	0	0	0	0	0	0	0	0	0	0	0	0	0	0	0	0	0	0	0	0	0	0	0	0	0	1	0	0	0	0	0	0	0	0
China_rumen1508	0	0	0	0	0	1	1	2	0	0	0	0	1	0	0	0	0	0	0	0	0	0	0	0	0	0	0	0	0	0	0	0	0	0	0	0	0	0	0	0	0	0	0	0	0	0	0	0	0
China_rumen1509	0	0	0	0	0	1	0	1	0	0	1	0	0	0	0	0	0	0	0	0	0	0	0	0	0	0	0	0	0	0	0	0	0	0	0	0	0	0	0	0	1	0	0	0	0	0	0	0	0
China_rumen151	0	0	0	1	0	2	0	1	0	0	0	0	1	0	0	0	0	0	0	0	0	0	0	0	0	1	0	0	0	0	0	0	0	0	0	0	0	0	0	0	0	0	0	0	2	1	0	0	0
China_rumen1510	0	0	0	1	0	0	0	0	0	0	1	0	2	0	0	0	1	0	0	0	0	0	0	0	0	0	0	0	0	0	0	0	0	0	0	0	0	0	0	0	1	0	0	0	0	0	0	0	0
China_rumen1511	0	0	0	1	0	0	0	1	0	0	1	0	0	0	0	1	0	0	0	0	0	0	0	0	0	0	0	0	0	0	0	0	0	0	0	0	0	0	0	0	1	0	0	0	0	0	0	0	0
China_rumen1512	0	0	0	0	0	2	1	2	0	0	0	0	0	0	0	0	0	0	0	0	0	0	0	0	0	0	0	0	0	0	0	0	0	0	0	0	0	0	0	0	0	0	0	0	0	0	0	0	0
China_rumen1513	1	1	0	0	0	0	0	1	0	0	1	0	0	0	0	0	1	0	0	0	0	0	0	0	0	0	0	0	0	0	0	0	0	0	0	0	0	0	0	0	1	0	0	0	0	0	0	0	0
China_rumen1514	0	1	0	0	0	1	0	1	0	0	1	0	0	0	0	0	0	0	0	0	0	0	0	0	0	0	0	0	0	0	0	0	0	0	0	0	0	0	0	0	1	0	0	0	0	0	0	0	0
China_rumen1515	0	0	0	1	0	0	0	1	0	0	1	0	0	0	0	0	0	0	0	0	0	0	0	0	0	0	0	0	0	0	0	0	0	0	0	0	0	0	0	0	1	0	0	0	0	0	0	0	0
China_rumen1516	0	1	0	0	0	1	0	0	0	0	1	0	1	0	1	0	0	0	0	0	0	0	0	0	0	0	0	0	0	0	0	0	0	0	0	0	0	0	0	0	1	0	0	0	0	0	0	0	0
China_rumen1517	1	2	0	0	0	1	0	1	0	0	0	0	0	0	0	0	0	0	0	0	0	0	0	0	0	0	0	1	0	0	0	0	0	0	0	0	0	0	0	0	0	0	0	0	0	0	0	0	0
China_rumen1518	1	0	0	0	0	1	0	1	0	0	1	0	0	0	0	0	0	0	0	0	0	0	0	0	0	0	0	0	0	0	0	0	0	0	0	0	0	0	0	0	1	0	0	0	0	0	0	0	0
China_rumen1519	1	1	0	0	0	0	0	1	1	0	1	0	0	0	0	0	0	0	0	0	0	0	0	0	0	0	0	0	0	0	0	0	0	0	0	0	0	0	0	0	1	0	0	0	0	0	0	0	0
China_rumen152	0	0	0	0	0	0	0	0	0	0	1	0	0	0	0	0	0	0	0	0	0	0	0	0	0	0	0	0	0	0	0	0	0	0	0	0	0	0	0	0	2	0	0	0	0	0	0	0	0
China_rumen1520	0	0	0	0	0	0	0	0	0	0	1	0	0	0	0	0	0	0	0	0	0	0	0	0	0	0	0	0	0	0	0	0	0	0	0	0	0	0	0	0	1	0	0	0	0	0	0	0	0
China_rumen1521	0	0	0	0	0	2	0	1	0	0	1	0	1	0	0	0	1	1	0	0	0	0	0	0	0	0	0	0	0	0	0	0	0	0	0	0	0	0	0	0	1	0	0	0	1	1	0	0	0
China_rumen1522	0	0	0	0	0	1	0	1	0	0	1	0	0	0	0	0	0	0	0	0	0	0	0	0	0	0	0	0	0	0	0	0	0	0	0	0	0	0	0	0	1	0	0	0	0	0	0	0	0
China_rumen1523	1	1	0	0	0	0	1	2	0	0	1	0	0	0	0	0	0	0	0	0	0	0	0	0	0	0	0	0	0	0	0	0	0	0	0	0	0	0	0	0	1	0	0	0	0	0	0	0	0
China_rumen1525	0	0	0	2	0	1	1	2	0	0	1	0	0	0	0	0	1	0	0	0	0	0	0	0	0	0	0	0	0	0	0	0	0	0	0	0	0	0	0	0	1	0	0	0	0	0	0	0	0
China_rumen1526	0	0	0	1	0	0	0	0	0	0	0	0	0	0	0	0	0	0	0	0	0	0	0	0	0	0	0	0	0	0	0	0	0	0	0	0	0	0	0	0	0	0	0	0	0	0	0	0	0
China_rumen1527	0	0	0	0	0	1	0	0	0	0	1	0	0	0	0	0	0	0	0	0	0	0	0	0	0	0	0	0	0	0	0	0	0	0	0	0	0	0	0	0	1	0	0	0	0	0	0	0	0
China_rumen1528	0	0	0	0	0	2	0	1	0	0	0	0	0	0	1	0	0	0	0	0	0	0	0	0	0	0	0	0	0	0	0	0	0	0	0	0	0	0	0	0	0	0	0	0	0	0	0	0	0
China_rumen1529	1	1	0	0	0	1	0	1	0	0	1	0	0	0	0	0	0	0	0	0	0	0	0	0	0	0	0	0	0	0	0	0	0	0	0	0	0	0	0	0	1	0	0	0	0	0	0	0	0
China_rumen153	0	0	0	0	0	1	0	0	0	0	1	0	0	0	0	0	0	0	0	0	0	0	0	0	0	0	0	0	0	0	0	0	0	0	0	0	0	0	0	0	1	0	0	0	0	0	0	0	0
China_rumen1530	0	0	0	0	0	2	1	2	1	0	0	0	0	0	0	0	0	0	0	0	0	0	0	0	0	0	0	0	0	0	0	0	0	0	0	0	0	0	0	0	0	0	0	0	0	0	0	0	0
China_rumen1531	0	0	0	0	0	0	0	0	0	0	1	0	1	0	0	0	0	0	0	0	0	0	0	0	0	0	0	0	0	0	0	0	0	0	0	0	0	0	0	0	1	0	0	0	0	0	0	0	0
China_rumen1532	0	0	0	0	0	1	0	1	0	1	1	0	0	0	0	0	0	0	0	0	0	0	0	0	0	0	0	0	0	0	0	0	0	0	0	0	0	0	0	0	1	0	0	0	0	0	0	0	0
China_rumen1533	0	0	0	0	0	2	1	1	1	0	1	0	0	0	0	0	0	0	0	0	0	0	0	0	0	0	0	0	0	0	0	0	0	0	0	0	0	0	0	0	1	0	0	0	0	0	0	0	0
China_rumen1534	0	0	0	0	0	1	0	1	0	0	1	0	1	0	0	0	0	0	0	0	0	0	0	0	0	0	0	0	0	0	0	0	0	0	0	0	0	0	0	0	1	0	0	0	0	0	0	0	0
China_rumen1535	1	1	0	0	0	1	1	2	0	0	1	0	1	0	0	0	1	1	0	0	0	0	0	0	0	0	0	0	0	0	0	0	0	0	0	0	0	0	0	0	1	0	0	0	0	0	0	0	0
China_rumen1536	0	0	0	0	0	2	0	1	1	0	0	0	0	0	0	0	0	0	0	0	0	0	0	0	0	0	0	0	0	0	0	0	0	0	0	0	0	0	0	0	0	0	0	0	0	0	0	0	0
China_rumen1537	0	0	0	0	0	1	0	1	0	0	2	0	0	0	0	0	0	0	0	0	0	0	0	0	0	0	0	0	0	0	0	0	0	0	0	0	0	0	0	0	1	0	0	0	0	0	0	0	0
China_rumen1538	0	0	0	0	0	1	0	0	0	0	2	0	0	0	0	0	0	0	0	0	0	0	0	0	0	0	0	0	0	0	0	0	0	0	0	0	0	0	0	0	2	0	0	0	1	1	0	1	0
China_rumen1539	0	0	0	0	0	1	0	1	0	0	0	0	0	0	0	0	0	0	0	0	0	0	0	0	0	0	0	0	0	0	0	0	0	0	0	0	0	0	0	0	1	0	0	0	0	0	0	0	0
China_rumen154	0	0	0	0	0	1	0	1	0	0	1	0	0	0	0	0	0	0	0	0	0	0	0	0	0	0	0	0	0	0	0	0	0	0	0	0	0	0	0	0	1	0	0	0	0	0	0	0	0
China_rumen1540	0	0	1	0	1	0	1	1	1	0	0	0	0	0	0	0	0	0	0	0	0	0	0	0	0	0	0	0	0	0	0	0	0	0	0	0	0	0	0	0	0	0	0	0	0	0	0	0	0
China_rumen1542	0	0	0	0	0	0	0	0	0	0	0	0	0	0	0	0	0	0	0	0	0	0	0	0	0	0	0	0	0	0	0	0	0	0	0	0	0	0	0	0	0	0	0	0	0	0	0	0	0
China_rumen1543	0	0	0	0	0	1	1	1	0	0	1	0	0	0	0	0	1	0	0	0	0	0	0	0	0	0	0	0	0	0	0	0	0	0	0	0	0	0	0	0	1	0	0	0	0	0	0	0	0
China_rumen1544	0	0	0	0	0	2	1	2	1	0	0	0	0	0	0	0	0	0	0	0	0	0	0	0	0	0	0	0	0	0	0	0	0	0	0	0	0	0	0	0	0	0	0	0	0	0	0	0	0
China_rumen1545	0	0	0	0	0	2	1	0	1	0	0	0	0	0	0	0	0	0	0	0	0	0	0	0	0	0	0	0	0	0	0	0	0	0	0	0	0	0	0	0	0	0	0	0	0	0	0	0	0
China_rumen1546	0	0	0	1	0	1	0	0	0	0	1	0	0	0	0	1	0	0	0	0	0	0	0	0	0	0	0	0	0	0	0	0	0	0	0	0	0	0	0	0	3	0	0	0	0	0	0	0	0
China_rumen1547	0	0	0	0	0	2	1	2	1	0	0	0	0	0	0	0	0	0	0	0	0	0	0	0	0	0	0	0	0	0	0	0	0	0	0	0	0	0	0	0	0	0	0	0	0	0	0	0	0
China_rumen1548	0	0	0	0	0	0	1	2	0	0	0	0	0	0	0	0	0	0	0	0	0	0	0	0	0	0	0	0	0	0	0	0	0	0	0	0	0	0	0	0	0	0	0	0	0	0	0	2	0
China_rumen1549	0	0	0	1	0	0	0	0	0	0	0	0	0	0	0	0	0	0	0	0	0	0	0	0	0	0	0	0	0	0	0	0	0	0	0	0	0	0	0	0	0	0	0	0	0	0	0	0	0
China_rumen155	0	0	0	1	0	0	0	0	0	0	0	0	0	0	0	0	0	0	0	0	0	0	0	0	0	0	0	0	0	0	0	0	0	0	0	0	0	0	0	0	0	0	0	0	0	0	0	0	0
China_rumen1550	1	1	0	0	0	1	0	1	2	0	1	0	0	0	0	0	0	0	0	0	0	0	0	0	0	0	0	0	0	0	0	0	0	0	0	0	0	0	0	0	1	0	0	0	0	0	0	0	0
China_rumen1551	0	0	0	0	0	2	0	1	1	0	0	0	0	0	0	0	0	0	0	0	0	0	0	0	0	0	0	0	0	0	0	0	0	0	0	0	0	0	0	0	0	0	0	0	0	0	0	0	0
China_rumen1552	1	1	0	0	0	0	1	2	0	0	0	0	1	0	0	0	1	0	0	0	0	0	0	0	0	0	0	0	0	0	0	0	0	0	0	0	0	0	0	0	0	0	0	0	0	0	0	0	0
China_rumen1553	0	0	0	0	0	2	1	1	1	0	0	0	0	0	0	0	0	0	0	0	0	0	0	0	0	0	0	0	0	0	0	0	0	0	0	0	0	0	0	0	0	0	0	0	0	0	0	0	0
China_rumen1554	0	0	0	0	0	0	0	1	0	0	0	0	0	0	0	0	0	0	0	0	0	0	0	0	0	0	0	0	0	0	0	0	0	0	0	0	0	0	0	0	0	0	0	0	0	0	0	0	0
China_rumen1555	0	0	0	0	0	0	0	0	0	0	0	0	0	0	0	0	0	0	0	0	0	0	0	0	0	0	0	0	0	0	0	0	0	0	0	0	0	0	0	0	0	0	0	0	0	0	1	1	0
China_rumen1556	0	0	0	0	0	2	0	0	0	0	0	0	0	0	0	0	0	0	0	0	0	0	0	0	0	0	0	0	0	0	1	0	0	0	0	0	0	0	0	0	0	0	0	0	0	0	0	0	0
China_rumen1557	0	0	0	0	0	1	1	1	1	0	0	0	0	0	0	0	0	0	0	0	0	0	0	0	0	0	0	0	0	0	0	0	0	0	0	0	0	0	0	0	0	0	0	0	0	0	0	0	0
China_rumen1558	0	0	0	0	0	1	0	0	0	1	0	0	0	0	0	0	0	0	0	0	0	0	0	0	0	0	0	0	0	0	0	0	0	0	0	0	0	0	0	0	0	0	0	0	0	0	0	0	0
China_rumen1559	0	0	0	1	0	0	0	1	0	0	0	0	0	0	0	0	0	0	0	0	0	0	0	0	0	0	0	0	0	0	0	0	0	0	0	0	0	0	0	0	0	0	0	0	0	0	0	0	0
China_rumen156	0	0	0	0	0	0	1	2	0	0	0	0	0	0	0	0	0	0	0	0	0	0	0	0	0	0	0	0	0	0	0	0	0	0	0	0	0	0	0	0	0	0	0	0	0	0	0	0	0
China_rumen1560	0	0	0	0	0	0	0	1	1	1	0	0	0	0	0	0	0	0	0	0	0	0	0	0	0	0	0	0	0	0	0	0	0	0	0	0	0	0	0	0	0	0	0	0	0	0	0	0	0
China_rumen1561	0	0	0	0	0	0	0	0	0	0	1	0	0	0	0	0	0	0	0	0	0	0	0	0	0	0	0	0	0	0	0	0	0	0	0	0	0	0	0	0	0	0	0	0	0	0	0	0	0
China_rumen1562	0	0	0	0	0	0	0	1	0	0	0	0	0	0	0	0	0	0	0	0	0	0	0	0	0	0	0	0	0	0	0	0	0	0	0	0	0	0	0	0	0	0	0	0	0	0	0	0	0
China_rumen1563	0	0	0	0	0	1	0	1	0	0	0	0	0	0	0	0	0	0	0	0	0	0	0	0	0	0	0	0	0	0	0	0	0	0	0	0	0	0	0	0	0	0	0	0	0	0	0	0	0
China_rumen1564	0	0	0	0	0	0	0	1	0	0	0	0	0	0	0	0	0	0	0	0	0	0	0	0	0	0	0	0	0	0	0	0	0	0	0	0	0	0	0	0	1	0	0	0	0	0	0	0	0
China_rumen1565	0	0	0	0	1	0	0	0	0	0	0	0	0	0	0	0	0	0	0	0	0	0	0	0	0	0	0	0	0	0	0	0	0	0	0	0	1	0	0	0	0	0	0	0	0	0	0	0	0
China_rumen1566	0	0	0	0	0	1	0	0	0	0	1	0	0	0	0	0	0	0	0	0	0	0	0	0	0	0	0	0	0	0	0	0	0	0	0	0	0	0	0	0	1	0	0	0	0	0	0	0	0
China_rumen1567	0	0	0	0	0	1	0	1	0	0	1	0	0	0	0	1	0	0	0	0	0	0	0	0	0	0	0	0	0	0	0	0	0	0	0	0	0	0	0	0	0	0	0	0	0	0	0	0	0
China_rumen1568	0	0	0	0	1	1	0	1	1	0	0	0	0	0	0	0	0	0	0	0	0	0	0	0	0	0	0	0	0	0	0	0	0	0	0	0	0	0	0	0	0	0	0	0	0	0	0	0	0
China_rumen1569	1	1	0	0	0	1	0	0	0	0	1	0	0	0	0	0	0	0	0	0	0	0	0	0	0	0	0	0	0	0	0	0	0	0	0	0	0	0	0	0	1	0	0	0	0	0	0	0	0
China_rumen157	0	0	0	0	0	1	0	1	0	0	0	0	1	0	0	0	0	0	0	0	0	0	0	0	0	0	0	0	0	0	0	0	0	0	0	0	0	0	0	0	0	0	0	0	0	0	0	2	0
China_rumen1570	0	0	0	0	0	1	1	0	0	1	0	0	0	0	0	0	0	0	0	0	0	0	0	0	0	0	0	0	0	0	0	0	0	0	0	0	0	0	0	0	0	0	0	0	0	0	0	0	0
China_rumen1571	0	0	0	1	0	0	0	1	0	0	0	0	0	0	0	0	0	0	0	0	0	0	0	0	0	0	0	0	0	0	0	0	0	0	0	0	0	0	0	0	0	0	0	0	0	0	0	0	0
China_rumen1572	0	0	0	0	0	0	0	0	0	0	0	0	0	0	0	0	0	0	0	0	0	0	0	0	0	0	0	0	0	0	0	0	0	0	0	0	0	0	0	0	0	0	0	0	0	0	0	0	0
China_rumen1573	0	0	0	0	0	0	0	1	0	0	0	0	0	0	0	1	1	0	0	0	0	0	0	0	0	0	0	0	0	0	0	0	0	0	0	0	0	0	0	0	0	0	0	0	0	0	0	0	0
China_rumen1574	0	0	0	0	0	0	0	1	0	0	1	0	0	0	0	0	0	0	0	0	0	0	0	0	0	0	0	0	0	0	0	0	0	0	0	0	0	0	0	0	1	0	0	0	0	0	0	0	0
China_rumen1575	0	0	0	0	1	2	0	1	1	0	0	0	0	0	0	0	0	0	0	0	0	0	0	0	0	0	0	0	0	0	0	0	0	0	0	0	0	0	0	0	0	0	0	0	0	0	0	0	0
China_rumen1576	0	0	0	0	0	1	0	0	0	0	1	0	0	0	0	0	0	0	0	0	0	0	0	0	0	0	0	0	0	0	0	0	0	0	0	0	0	0	0	0	1	0	0	0	0	0	0	0	0
China_rumen1577	0	0	0	0	0	2	2	0	0	0	0	0	0	0	0	0	0	0	0	0	0	0	0	0	0	0	0	0	0	0	0	0	0	0	0	0	0	0	0	0	0	0	0	0	0	0	0	0	0
China_rumen1578	0	0	0	0	0	1	0	0	0	0	0	0	0	0	0	0	0	0	0	0	0	0	0	0	0	0	0	0	0	0	1	0	0	0	0	0	0	0	0	0	0	0	0	0	0	0	0	0	0
China_rumen1579	0	0	2	1	0	1	0	1	0	0	1	0	1	0	0	0	0	1	0	0	0	0	0	0	0	0	0	0	0	0	0	0	0	0	0	0	0	0	0	0	1	0	0	0	0	0	0	0	0
China_rumen158	0	0	0	1	0	0	0	0	0	0	1	0	0	0	0	1	0	0	0	0	0	0	0	0	0	0	0	0	0	0	0	0	0	0	0	0	0	0	0	0	1	0	0	0	0	0	0	0	0
China_rumen1580	0	0	0	0	0	1	0	0	0	1	0	0	0	0	0	0	0	0	0	0	0	0	0	0	0	0	0	0	0	0	0	0	0	0	0	0	0	0	0	0	0	0	0	0	0	0	0	0	0
China_rumen1581	0	0	0	0	0	0	0	0	0	0	0	0	0	0	0	0	0	0	0	0	0	0	0	0	0	0	0	0	0	0	0	0	0	0	0	0	0	0	0	0	0	0	0	0	0	0	0	0	0
China_rumen1582	0	0	0	0	0	1	0	0	1	0	1	0	0	0	0	0	0	0	0	0	0	0	0	0	0	0	0	0	0	0	0	0	0	0	0	0	0	0	0	0	1	0	0	0	0	0	0	0	0
China_rumen1583	1	1	0	0	0	0	0	0	0	0	0	0	0	0	0	0	0	0	0	0	0	0	0	0	0	0	0	0	0	0	0	0	0	0	0	0	0	0	0	0	0	0	0	0	0	0	0	0	0
China_rumen1584	0	0	0	0	0	2	0	1	1	0	0	0	0	0	0	0	0	0	0	0	0	0	0	0	0	0	0	0	0	0	0	0	0	0	0	0	0	0	0	0	0	0	0	0	0	0	0	0	0
China_rumen1585	1	0	0	0	0	1	1	2	0	0	0	0	1	0	1	0	0	0	0	0	0	0	0	0	0	0	0	0	0	0	0	0	0	0	0	0	0	0	0	0	0	0	0	0	0	0	0	0	0
China_rumen1586	0	0	0	0	0	1	0	2	0	0	0	0	0	0	0	0	0	0	0	0	0	0	0	0	0	0	0	0	0	0	0	0	0	0	0	0	0	0	0	0	1	0	0	0	0	0	0	0	0
China_rumen1587	0	0	0	1	0	0	0	0	0	0	0	0	0	0	0	0	0	0	0	0	0	0	0	0	0	0	0	0	0	0	0	0	0	0	0	0	0	0	0	0	0	0	0	0	0	0	0	0	0
China_rumen1588	1	1	0	0	0	1	0	1	0	0	1	0	0	0	0	0	0	0	0	0	0	0	0	0	0	0	0	0	0	0	0	0	0	0	0	0	0	0	0	0	1	0	0	0	0	0	0	0	0
China_rumen1589	0	0	0	0	0	2	0	1	1	0	0	0	0	0	0	0	0	0	0	0	0	0	0	0	0	0	0	0	0	0	0	0	0	0	0	0	0	0	0	0	0	0	0	0	0	0	0	0	0
China_rumen159	0	0	0	0	0	0	0	2	2	0	0	0	0	0	0	0	0	0	0	0	0	0	0	0	0	0	0	0	0	0	0	0	0	0	0	0	0	0	0	0	0	0	0	0	0	0	0	0	0
China_rumen1590	1	0	0	0	0	1	0	1	1	0	0	0	0	0	0	0	0	0	0	0	0	0	0	0	0	0	0	0	0	0	0	0	0	0	0	0	0	0	0	0	1	0	0	0	0	0	0	0	0
China_rumen1591	0	0	0	0	0	1	0	1	0	0	1	0	0	0	0	0	0	0	0	0	0	0	0	0	0	0	0	0	0	0	0	0	0	0	0	0	0	0	0	0	2	0	0	0	0	0	0	0	0
China_rumen1592	0	0	0	0	0	1	0	1	0	0	1	0	0	0	0	0	0	0	0	0	0	0	0	0	0	0	0	0	0	0	0	0	0	0	0	0	0	0	0	0	2	0	0	0	0	0	0	0	0
China_rumen1593	0	0	0	0	0	0	0	0	0	0	0	0	0	0	0	0	0	0	0	0	0	0	0	0	0	0	0	0	0	0	0	0	0	0	0	0	0	0	0	0	1	0	0	0	0	0	0	0	0
China_rumen1594	0	0	1	0	0	1	0	1	0	0	0	0	0	0	0	0	0	0	0	0	0	0	0	0	0	0	0	0	0	0	0	0	0	0	0	0	0	0	0	0	1	0	0	0	0	0	0	0	0
China_rumen1595	0	1	0	0	0	1	0	1	0	0	1	0	0	0	0	0	0	0	0	0	0	0	0	0	0	0	0	0	0	0	0	0	0	0	0	0	0	0	0	0	1	0	0	0	0	0	0	0	0
China_rumen1596	0	0	2	1	0	1	0	2	0	0	1	0	1	0	0	0	0	1	0	0	0	0	0	0	0	0	0	0	0	0	0	0	0	0	0	0	0	0	0	0	1	0	0	0	0	0	0	0	0
China_rumen1597	0	0	0	0	0	1	0	1	0	1	0	0	0	0	0	0	0	0	0	0	0	0	0	0	0	0	0	0	0	0	0	0	0	0	0	0	0	0	0	0	0	0	0	0	0	0	0	0	0
China_rumen1598	0	1	0	0	0	0	0	0	0	0	0	0	0	0	0	0	0	0	0	0	0	0	0	0	0	1	0	0	0	0	0	0	0	0	0	0	0	0	0	0	0	0	0	0	0	0	0	0	0
China_rumen1599	0	0	0	0	0	0	0	1	0	1	1	0	0	0	0	0	0	0	0	0	0	0	0	0	0	0	0	0	0	0	0	0	0	0	0	0	0	0	0	0	1	0	0	0	0	0	0	0	0
China_rumen160	0	0	0	0	0	1	0	1	0	0	0	0	0	0	0	0	0	0	0	0	0	0	0	0	0	0	0	0	0	0	0	0	0	0	0	0	0	0	0	0	0	0	0	0	0	0	0	0	0
China_rumen1600	0	0	0	1	0	1	0	1	0	1	0	0	0	0	0	0	0	0	0	0	0	0	0	0	0	0	0	0	0	0	0	0	0	0	0	0	0	0	0	0	0	0	0	0	0	0	0	0	0
China_rumen1601	0	0	0	0	0	1	0	0	0	0	0	0	0	0	0	0	0	0	0	0	0	0	0	0	0	0	0	0	0	0	0	0	0	0	0	0	0	0	0	0	0	0	0	0	0	0	0	0	0
China_rumen1602	0	0	0	0	0	0	0	0	1	0	0	0	0	0	0	0	0	0	0	0	0	0	0	0	0	0	0	0	0	0	0	0	0	0	0	0	0	0	0	0	0	0	0	0	0	0	0	0	0
China_rumen1603	0	0	0	0	1	0	0	0	1	0	1	0	0	0	0	0	0	0	0	0	0	0	0	0	0	0	0	0	0	0	0	0	0	0	0	0	0	0	0	0	1	0	0	0	0	0	0	0	0
China_rumen1604	0	0	0	0	0	1	0	1	0	0	1	0	0	0	0	0	0	0	0	0	0	0	0	0	0	0	0	0	0	0	0	0	0	0	0	0	0	0	0	0	1	0	0	0	0	0	0	0	0
China_rumen1605	0	0	0	0	0	0	0	1	0	0	0	0	0	0	0	0	0	0	0	0	0	0	0	0	0	0	0	0	0	0	0	0	0	0	0	0	0	0	0	0	1	0	0	0	0	0	0	0	0
China_rumen1606	0	0	0	0	0	2	1	2	1	0	0	0	0	0	0	0	0	0	0	0	0	0	0	0	0	0	0	0	0	0	0	0	0	0	0	0	0	0	0	0	0	0	0	0	0	0	0	0	0
China_rumen1607	0	0	0	1	0	0	0	0	0	0	0	0	0	0	0	0	0	0	0	0	0	0	0	0	0	0	0	0	0	0	0	0	0	0	0	0	0	0	0	0	0	0	0	0	0	0	0	0	0
China_rumen1608	0	0	0	0	0	0	0	0	0	0	1	0	0	0	0	0	0	0	0	0	0	0	0	0	0	0	0	0	0	0	0	0	0	0	0	0	0	0	0	0	1	0	0	0	0	0	0	0	0
China_rumen1609	0	0	0	0	0	1	0	1	0	0	1	0	0	0	0	0	0	0	0	0	0	0	0	0	0	0	0	0	0	0	0	0	0	0	0	0	0	0	0	0	1	0	0	0	0	0	0	0	0
China_rumen161	0	0	0	0	0	1	0	1	0	0	0	0	0	0	0	0	0	0	0	0	0	0	0	0	0	0	0	0	0	0	0	0	0	0	0	0	0	0	0	0	0	0	0	0	0	0	0	0	0
China_rumen1610	0	0	0	1	0	1	0	1	0	0	1	0	0	0	0	0	0	0	0	0	0	0	0	0	0	0	0	0	0	0	0	0	0	0	0	0	0	0	0	0	1	0	0	0	0	0	0	0	0
China_rumen1611	1	1	0	0	1	1	0	1	1	0	1	0	1	0	0	0	0	0	0	0	0	0	0	0	0	0	0	0	0	0	0	0	0	0	0	0	0	0	0	0	1	0	0	0	0	0	0	0	0
China_rumen1612	0	0	0	0	0	1	0	1	0	0	1	0	0	0	0	1	0	0	0	0	0	0	0	0	0	0	0	0	0	0	0	0	0	0	0	0	0	0	0	0	1	0	0	0	0	0	0	0	0
China_rumen1614	0	0	0	0	0	1	0	0	0	0	0	0	0	0	0	0	0	0	0	0	0	0	0	0	0	0	0	0	0	0	0	0	0	0	0	0	0	0	0	0	2	0	0	0	0	0	0	0	0
China_rumen1615	0	0	0	0	0	2	0	1	0	0	1	0	0	0	0	0	0	0	0	0	0	0	0	0	0	0	0	0	0	0	0	0	0	0	0	0	0	0	0	0	1	0	0	0	0	0	0	0	0
China_rumen1616	0	0	1	0	0	1	1	1	0	0	1	0	0	0	0	0	1	0	0	0	0	0	0	0	0	0	0	0	0	0	0	0	0	0	0	0	0	0	0	0	1	0	0	0	0	0	0	0	0
China_rumen1617	0	0	0	0	1	1	0	1	0	1	0	0	0	0	0	0	0	0	0	0	0	0	0	0	0	0	0	0	0	0	0	0	0	0	0	0	0	0	0	0	0	0	0	0	0	0	0	0	0
China_rumen1618	0	0	0	1	0	1	1	2	0	0	1	0	0	0	0	0	0	0	0	0	0	0	0	0	0	0	0	0	0	0	0	0	0	0	0	0	0	0	0	0	1	0	0	0	0	0	0	0	0
China_rumen1619	0	0	0	1	0	0	1	1	0	0	0	0	0	0	0	0	0	0	0	0	0	0	0	0	0	0	0	0	0	0	0	0	0	0	0	0	0	0	0	0	0	0	0	0	0	0	0	0	0
China_rumen162	0	0	0	0	0	0	0	1	0	0	1	0	0	0	0	0	0	0	0	0	0	0	0	0	0	0	0	0	0	0	0	0	0	0	0	0	0	0	0	0	1	0	0	0	0	0	0	0	0
China_rumen1622	0	0	0	0	0	1	0	1	0	0	0	0	0	0	0	0	0	0	0	0	0	0	0	0	0	0	0	0	0	0	0	0	0	0	0	0	0	0	0	0	0	0	0	0	0	0	0	0	0
China_rumen1623	0	0	0	0	0	1	0	1	0	0	1	0	0	0	0	0	0	0	0	0	0	0	0	0	0	0	0	0	0	0	0	0	0	0	0	0	0	0	0	0	1	0	0	0	0	0	0	0	0
China_rumen1624	0	0	0	0	0	1	0	0	0	0	1	0	0	0	0	0	0	0	0	0	0	0	0	1	0	0	0	0	0	0	0	0	0	0	1	0	0	0	0	0	1	0	0	0	1	1	0	1	0
China_rumen1625	0	0	0	0	0	0	0	0	0	0	1	0	0	0	0	0	0	0	0	0	0	0	0	0	0	0	0	0	0	0	0	0	0	0	0	0	0	0	0	0	1	0	0	0	0	0	0	0	0
China_rumen1626	0	0	0	0	0	1	0	0	0	0	1	0	0	0	0	0	0	0	0	0	0	0	0	0	0	0	0	0	0	0	0	0	0	0	0	0	0	0	0	0	1	0	0	0	1	1	0	1	0
China_rumen1627	0	0	0	0	0	1	1	2	0	0	0	0	0	0	0	0	0	0	0	0	0	0	0	0	0	0	0	0	0	0	0	0	0	0	0	0	0	0	0	0	0	0	0	0	0	0	0	0	0
China_rumen1628	0	0	0	0	0	1	0	1	0	0	1	0	0	0	0	0	0	0	0	0	0	0	0	0	0	0	0	0	0	0	0	0	0	0	0	0	0	0	0	0	1	0	0	0	0	0	0	0	0
China_rumen1629	0	0	0	1	0	0	0	1	0	0	0	0	0	0	0	0	0	0	0	0	0	0	0	0	0	0	0	0	0	0	0	0	0	0	0	0	0	0	0	0	0	0	0	0	0	0	0	0	0
China_rumen163	0	0	0	0	0	2	0	0	0	0	1	0	0	0	0	0	0	0	0	0	0	0	0	0	0	0	0	0	0	0	0	0	0	0	0	0	0	0	0	0	1	0	0	0	0	0	0	0	0
China_rumen1630	0	0	0	0	0	2	0	1	1	0	0	0	0	0	0	0	0	0	0	0	0	0	0	0	0	0	0	0	0	0	0	0	0	0	0	0	0	0	0	0	0	0	0	0	0	0	0	0	0
China_rumen1631	0	0	0	0	0	1	0	0	0	0	0	0	0	0	0	0	0	0	0	0	0	0	0	0	0	0	0	0	0	0	0	0	0	0	0	0	0	0	0	0	0	0	0	0	0	0	0	0	0
China_rumen1632	1	1	0	0	0	1	0	1	0	0	1	0	0	0	0	0	0	0	0	0	0	0	0	0	0	0	0	0	0	0	0	0	0	0	0	0	0	0	0	0	1	0	0	0	0	0	0	0	0
China_rumen1633	0	0	0	1	0	1	0	1	0	0	1	0	0	0	0	0	0	0	0	0	0	0	0	0	0	0	0	0	0	0	0	0	0	0	0	0	0	0	0	0	1	0	0	0	0	0	0	0	0
China_rumen1634	0	0	0	0	1	2	0	1	1	0	0	0	0	0	0	0	0	0	0	0	0	0	0	0	0	0	0	0	0	0	0	0	0	0	0	0	0	0	0	0	0	0	0	0	0	0	0	0	0
China_rumen1635	0	0	0	0	0	1	1	1	1	0	0	0	0	0	0	0	0	0	0	0	0	0	0	0	0	0	0	0	0	0	0	0	0	0	0	0	0	0	0	0	0	0	0	0	0	0	0	0	0
China_rumen1636	0	0	0	0	0	2	0	1	2	0	0	0	0	0	0	0	0	0	0	0	0	0	0	0	0	0	0	0	0	0	0	0	0	0	0	0	0	0	0	0	0	0	0	0	0	0	0	0	0
China_rumen1637	0	0	0	0	0	2	0	1	0	1	0	0	0	0	0	0	0	0	0	0	0	0	0	0	0	0	0	0	0	0	0	0	0	0	0	0	0	0	0	0	0	0	0	0	0	0	0	0	0
China_rumen1638	0	0	0	0	0	2	1	2	1	0	0	0	0	0	0	0	0	0	0	0	0	0	0	0	0	0	0	0	0	0	0	0	0	0	0	0	0	0	0	0	0	0	0	0	0	0	0	0	0
China_rumen1639	0	0	0	1	0	1	0	1	0	0	1	0	0	0	0	0	0	0	0	0	0	0	0	0	0	0	0	0	0	0	0	0	0	0	0	0	0	0	0	0	1	0	0	0	0	0	0	0	0
China_rumen164	0	0	0	1	0	1	1	1	0	0	1	0	0	0	0	1	0	0	0	0	0	0	0	0	0	0	0	0	0	0	0	0	0	0	0	0	0	0	0	0	2	0	0	0	0	0	0	0	0
China_rumen1640	0	0	0	1	0	0	1	2	0	0	0	0	0	0	0	0	0	0	0	0	0	0	0	0	0	0	0	0	0	0	0	0	0	0	0	0	0	0	0	0	1	0	0	0	0	0	0	0	0
China_rumen1641	0	0	0	0	0	1	0	0	0	0	1	0	0	0	0	0	0	0	0	0	0	0	0	0	0	0	0	0	0	0	0	0	0	0	0	0	0	0	0	0	1	0	0	0	0	0	0	0	0
China_rumen1642	0	0	0	0	0	4	0	0	1	0	0	0	0	0	0	0	0	0	0	0	0	0	0	0	0	0	0	0	0	0	0	0	0	0	0	0	0	0	0	0	0	0	0	0	0	0	0	0	0
China_rumen1643	0	0	0	0	0	2	0	1	1	0	0	0	0	0	0	0	0	0	0	0	0	0	0	0	0	0	0	0	0	0	0	0	0	0	0	0	0	0	0	0	0	0	0	0	0	0	0	0	0
China_rumen1644	0	1	0	0	1	0	0	1	0	0	0	0	0	0	0	0	0	0	0	0	0	0	0	0	0	0	0	0	0	0	0	0	0	0	0	0	0	0	0	0	1	0	0	0	0	0	0	0	0
China_rumen1646	0	0	0	1	0	1	0	1	0	0	1	0	0	0	0	0	0	0	0	0	0	0	0	0	0	0	0	0	0	0	0	0	0	0	0	0	0	0	0	0	0	0	0	0	0	0	0	0	0
China_rumen1647	0	0	0	0	0	1	1	1	0	0	1	0	0	0	0	0	0	0	0	0	0	0	0	0	0	0	0	0	0	0	0	0	0	0	0	0	0	0	0	0	1	0	0	0	0	0	0	0	0
China_rumen1648	0	0	0	0	1	0	0	0	0	0	0	0	0	0	0	0	0	0	0	0	0	0	0	0	0	0	0	0	0	0	0	0	0	0	0	0	0	0	0	0	0	0	0	0	0	0	0	0	0
China_rumen1649	0	0	0	0	1	1	0	1	1	0	0	0	0	0	0	0	0	0	0	0	0	0	0	0	0	0	0	0	0	0	0	0	0	0	0	0	0	0	0	0	0	0	0	0	0	0	0	0	0
China_rumen165	0	0	0	1	0	0	0	1	0	0	0	0	0	0	0	0	0	0	0	0	0	0	0	0	0	0	0	0	0	0	0	0	0	0	0	0	0	0	0	0	1	0	0	0	0	0	0	0	0
China_rumen1650	0	0	0	0	0	2	0	0	0	0	0	0	0	0	0	0	0	0	0	0	0	0	0	0	0	0	0	0	0	0	0	0	0	0	0	0	0	0	0	0	0	0	0	0	0	0	0	0	0
China_rumen1651	0	0	0	0	0	0	0	0	1	0	0	0	0	0	0	0	0	0	0	0	0	0	0	0	0	0	0	0	0	0	0	0	0	0	0	0	0	0	0	0	1	0	0	0	0	0	0	0	0
China_rumen1652	0	0	0	0	0	2	1	1	1	0	0	0	0	0	0	0	0	0	0	0	0	0	0	0	0	0	0	0	0	0	0	0	0	0	0	0	0	0	0	0	0	0	0	0	0	0	0	0	0
China_rumen1653	0	0	0	1	0	1	1	2	0	0	0	0	1	0	1	0	0	0	0	0	0	0	0	0	0	0	0	0	0	0	0	0	0	0	0	0	0	0	0	0	0	0	0	0	0	0	0	0	0
China_rumen1654	0	0	0	1	0	0	0	0	0	0	2	0	1	0	0	0	0	0	0	0	0	0	0	0	0	0	0	0	0	0	0	0	0	0	0	0	0	0	0	0	1	0	0	0	0	0	0	0	0
China_rumen1655	0	0	0	0	0	1	0	1	0	0	1	0	0	0	0	0	0	0	0	0	0	0	0	0	0	0	0	0	0	0	0	0	0	0	0	0	0	0	0	0	1	0	0	0	0	0	0	0	0
China_rumen1656	0	0	0	0	0	2	0	1	1	0	0	0	0	0	0	0	0	0	0	0	0	0	0	0	0	0	0	0	0	0	0	0	0	0	0	0	0	0	0	0	0	0	0	0	0	0	0	0	0
China_rumen1657	0	0	0	0	0	1	0	2	0	0	0	0	0	0	0	0	0	0	0	0	0	0	0	0	0	0	0	0	0	0	0	0	0	0	0	0	0	0	0	0	0	0	0	0	0	0	0	0	0
China_rumen1658	0	0	0	0	0	1	0	0	0	0	0	0	0	0	0	0	0	0	0	0	0	0	0	0	0	0	0	0	0	0	0	0	0	0	0	0	0	0	0	0	0	0	0	0	0	0	0	0	0
China_rumen1659	0	0	0	0	0	1	0	0	1	0	0	0	0	0	0	0	0	0	0	0	0	0	0	0	0	0	0	0	0	0	0	0	0	0	0	0	0	0	0	0	0	0	0	0	0	0	0	0	0
China_rumen166	0	0	0	0	0	2	1	1	1	0	0	0	0	0	0	0	0	0	0	0	0	0	0	0	0	0	0	0	0	0	0	0	0	0	0	0	0	0	0	0	0	0	0	0	0	0	0	0	0
China_rumen1660	0	0	0	0	0	0	0	0	0	0	1	0	0	0	0	0	0	0	0	0	0	0	0	0	0	0	0	0	0	0	0	0	0	0	0	0	0	0	0	0	1	0	0	0	0	0	0	0	0
China_rumen1661	0	0	0	0	0	2	0	1	0	0	0	0	0	0	0	0	0	0	0	0	0	0	0	0	0	0	0	0	0	0	0	0	0	0	0	0	0	0	0	0	0	0	0	0	0	0	0	0	0
China_rumen1662	0	0	0	1	0	1	1	2	0	0	2	0	1	0	0	0	1	0	0	0	0	0	0	0	0	0	0	0	0	0	0	0	0	0	0	0	0	0	0	0	1	0	0	0	0	0	0	0	0
China_rumen1663	0	0	0	1	0	0	2	2	0	0	0	0	0	0	0	0	1	0	0	0	0	0	0	0	0	0	0	0	0	0	0	0	0	0	0	0	0	0	0	0	0	0	0	0	0	0	0	0	0
China_rumen1664	0	0	0	0	0	1	0	1	0	0	1	0	0	0	0	0	0	0	0	0	0	0	0	0	0	0	0	0	0	0	0	0	0	0	0	0	0	0	0	0	0	0	0	0	0	0	0	0	0
China_rumen1665	0	0	0	0	0	1	1	2	0	0	1	0	0	0	0	0	1	0	0	0	0	0	0	0	0	0	0	0	0	0	0	0	0	0	0	0	0	0	0	0	1	0	0	0	0	0	0	0	0
China_rumen1666	0	0	0	1	0	0	1	1	0	0	1	0	0	0	0	0	1	0	0	0	0	0	0	0	0	0	0	0	0	0	0	0	0	0	0	0	0	0	0	0	0	0	0	0	0	0	0	0	0
China_rumen1667	0	0	0	0	0	2	0	0	0	0	0	0	0	0	0	0	0	0	0	0	0	0	0	0	0	0	0	0	0	0	0	0	0	0	0	0	0	0	0	0	0	0	0	0	0	0	0	0	0
China_rumen1668	0	0	0	1	0	0	0	0	0	0	0	0	0	0	0	0	0	0	0	0	0	0	0	0	0	0	0	0	0	0	0	0	0	0	0	0	0	0	0	0	0	0	0	0	0	0	0	0	0
China_rumen1669	0	1	0	1	0	0	0	2	0	0	0	0	1	0	0	0	0	0	0	0	0	0	0	0	0	0	0	0	0	0	0	0	0	0	0	0	0	0	0	0	1	0	0	0	1	1	0	0	0
China_rumen167	0	0	0	0	0	1	0	0	0	0	0	0	0	0	0	0	0	0	0	0	0	0	0	0	0	1	0	0	0	0	0	0	0	0	0	0	0	0	0	0	0	0	0	0	0	0	0	0	0
China_rumen1670	1	1	0	0	0	1	0	1	1	0	1	0	0	0	0	0	0	0	0	0	0	0	0	0	0	0	0	0	0	0	0	0	0	0	0	0	0	0	0	0	1	0	0	0	0	0	0	0	0
China_rumen1671	0	0	0	0	0	2	0	1	1	0	0	0	0	0	0	0	0	0	0	0	0	0	0	0	0	0	0	0	0	0	0	0	0	0	0	0	0	0	0	0	0	0	0	0	0	0	0	0	0
China_rumen1672	0	0	0	1	0	0	0	1	0	0	1	0	0	0	0	0	0	0	0	0	0	0	0	0	0	0	0	0	0	0	0	0	0	0	0	0	0	0	0	0	2	0	0	0	0	0	0	0	0
China_rumen1673	0	0	0	0	0	1	0	1	1	0	0	0	0	0	0	0	0	0	0	0	0	0	0	0	0	0	0	0	0	0	0	0	0	0	0	0	0	0	0	0	0	0	0	0	0	0	0	0	0
China_rumen1674	0	0	0	0	0	1	0	1	0	0	1	0	0	0	0	0	0	0	0	0	0	0	0	0	0	0	0	0	0	0	0	0	0	0	0	0	0	0	0	0	1	0	0	0	0	0	0	0	0
China_rumen1675	0	0	0	0	0	0	0	0	1	0	0	0	0	0	0	0	0	0	0	0	0	0	0	0	0	0	0	0	0	0	0	0	0	0	0	0	0	0	0	0	0	0	0	0	0	0	0	0	0
China_rumen1676	0	0	0	1	0	0	0	0	0	0	0	0	0	0	0	0	0	0	0	0	0	0	0	0	0	0	0	0	0	0	0	0	0	0	0	0	0	0	0	0	0	0	0	0	0	0	0	0	0
China_rumen1677	0	0	0	0	0	1	0	0	1	0	1	0	0	0	0	0	0	0	0	0	0	0	0	0	0	0	0	0	0	0	0	0	0	0	0	0	0	0	0	0	1	0	0	0	0	0	0	0	0
China_rumen1678	1	1	0	0	0	1	0	1	0	0	1	0	0	0	0	0	0	0	0	0	0	0	0	0	0	0	0	0	0	0	0	0	0	0	0	0	0	0	0	0	1	0	0	0	0	0	0	0	0
China_rumen1679	0	0	0	0	0	1	0	0	0	0	1	0	0	0	0	0	0	0	0	0	0	0	0	0	0	0	0	0	0	0	0	0	0	0	0	0	0	0	0	0	1	0	0	0	0	0	0	0	0
China_rumen168	0	0	0	0	0	1	0	0	1	0	0	0	0	0	0	0	0	0	0	0	0	0	0	0	0	0	0	0	0	0	0	0	0	0	0	0	0	0	0	0	0	0	0	0	0	0	0	0	0
China_rumen1680	0	0	0	0	0	0	1	2	0	0	1	0	0	0	0	0	0	0	0	0	0	0	0	0	0	0	0	0	0	0	0	0	0	0	0	0	0	0	0	0	1	0	0	0	0	0	0	0	0
China_rumen1681	0	0	0	0	0	0	0	1	0	1	0	0	0	0	0	0	0	0	0	0	0	0	0	0	0	0	0	0	0	0	0	0	0	0	0	0	0	0	0	0	0	0	0	0	0	0	0	0	0
China_rumen1683	0	0	0	0	0	0	0	1	1	0	1	0	0	0	0	0	0	0	0	0	0	0	0	0	0	0	0	0	0	0	0	0	0	0	0	0	0	0	0	0	0	0	0	0	0	0	0	0	0
China_rumen1684	0	0	0	0	0	2	0	1	0	0	0	0	0	0	0	0	0	0	0	0	0	0	0	0	0	0	0	0	0	0	0	0	0	0	0	0	0	0	0	0	0	0	0	0	0	0	0	0	0
China_rumen1685	0	0	0	0	1	1	0	0	0	2	0	0	0	0	0	0	0	0	0	0	0	0	0	0	0	0	0	0	0	0	0	0	0	0	0	0	0	0	0	0	0	0	0	0	0	0	0	0	0
China_rumen1686	0	0	0	0	0	1	0	1	0	0	0	0	0	0	0	0	0	0	0	0	0	0	0	0	0	0	0	0	0	0	0	0	0	0	0	0	0	0	0	0	1	0	0	0	0	0	0	0	0
China_rumen1687	0	0	0	0	0	1	0	0	1	0	1	0	0	0	0	0	0	0	0	0	0	0	0	0	0	0	0	0	0	0	0	0	0	0	0	0	0	0	0	0	1	0	0	0	0	0	0	0	0
China_rumen1688	0	0	0	0	0	0	0	0	0	0	0	0	0	0	0	0	0	0	0	0	0	0	0	0	0	0	0	0	0	0	1	0	0	0	0	0	0	0	0	0	0	0	0	2	0	0	0	0	0
China_rumen1689	0	0	0	0	0	1	0	0	2	0	0	0	0	0	0	0	0	0	0	0	0	0	0	0	0	0	0	0	0	0	0	0	0	0	0	0	0	0	0	0	0	0	0	0	0	0	0	0	0
China_rumen169	0	0	1	0	0	1	0	0	0	0	0	0	1	0	0	0	1	0	0	0	0	0	0	0	0	0	0	0	0	0	0	0	0	0	0	0	0	0	0	0	0	0	0	0	0	0	0	0	0
China_rumen1690	0	0	0	0	0	0	0	0	0	0	0	0	0	0	0	0	1	0	0	0	0	0	0	0	0	0	0	0	0	0	0	0	0	0	0	0	0	0	0	0	1	0	0	0	0	0	0	0	0
China_rumen1691	0	0	0	0	0	1	0	1	0	0	1	0	0	0	0	0	0	0	0	0	0	0	0	0	0	0	0	0	0	0	0	0	0	0	0	0	0	0	0	0	1	0	0	0	0	0	0	0	0
China_rumen1692	0	0	0	0	0	1	0	2	0	0	1	0	1	0	0	0	1	1	0	0	0	0	0	0	0	0	0	0	0	0	0	0	0	0	0	0	0	0	0	0	1	0	0	0	0	0	0	0	0
China_rumen1693	0	0	0	0	0	1	0	1	0	0	1	0	0	0	0	0	0	0	0	0	0	0	0	0	0	0	0	0	0	0	0	0	0	0	0	0	0	0	0	0	2	0	0	0	0	0	0	0	0
China_rumen1694	1	1	0	0	0	0	0	1	0	0	0	0	0	0	0	0	0	0	0	0	0	0	0	0	0	0	0	0	0	0	0	0	0	0	0	0	0	0	0	0	1	0	0	0	0	0	0	0	0
China_rumen1695	0	0	0	0	1	1	0	1	1	0	0	0	0	0	0	0	0	0	0	0	0	0	0	0	0	0	0	0	0	0	0	0	0	0	0	0	0	0	0	0	0	0	0	0	0	0	0	0	0
China_rumen1696	0	0	0	0	0	3	1	2	0	0	0	0	0	0	0	0	0	0	0	0	0	0	0	0	0	0	0	0	0	0	0	0	0	0	0	0	0	0	0	0	0	0	0	0	0	0	0	0	0
China_rumen1697	0	0	0	0	0	1	0	0	0	0	0	0	0	0	0	0	0	0	0	0	0	0	0	0	0	0	0	0	0	0	0	0	0	0	0	0	0	0	0	0	0	0	0	0	0	0	0	2	0
China_rumen1698	0	0	0	0	0	1	0	1	0	0	1	0	0	0	0	0	0	0	0	0	0	0	0	0	0	0	0	0	0	0	0	0	0	0	0	0	0	0	0	0	1	0	0	0	0	0	0	0	0
China_rumen1699	0	0	0	0	1	0	0	1	0	0	0	0	0	0	0	0	0	0	0	0	0	0	0	0	0	0	0	0	0	0	0	0	0	0	0	0	0	0	0	0	1	0	0	0	0	0	0	0	0
China_rumen17	0	0	0	0	0	1	0	1	0	0	0	0	0	0	0	0	0	0	0	0	0	0	0	0	0	0	0	0	0	0	0	0	0	0	0	0	0	0	0	0	0	0	0	0	0	0	0	0	0
China_rumen1700	0	0	0	1	0	1	0	2	0	0	0	0	0	0	0	0	0	0	0	0	0	0	0	0	0	0	0	0	0	0	0	0	0	0	0	0	0	0	0	0	0	0	0	0	0	0	0	0	0
China_rumen1701	1	1	0	0	0	1	0	1	0	0	0	0	0	0	0	0	0	0	0	0	0	0	0	0	0	0	0	0	0	0	0	0	0	0	0	0	0	0	0	0	1	0	0	0	0	0	0	0	0
China_rumen1702	0	0	0	0	1	0	0	1	1	0	0	0	0	0	0	0	0	0	0	0	0	0	0	0	0	0	0	0	0	0	0	0	0	0	0	0	0	0	0	0	0	0	0	0	0	0	0	0	0
China_rumen1703	0	0	0	1	0	1	0	1	0	2	0	0	0	0	0	0	0	0	0	0	0	0	0	0	0	0	0	0	0	0	0	0	0	0	0	0	0	0	0	0	0	0	0	0	0	0	0	0	0
China_rumen1704	0	0	0	0	0	2	0	0	0	0	0	0	0	0	0	0	0	0	0	0	0	0	0	0	0	0	0	0	0	0	0	0	0	0	0	0	0	0	0	0	0	0	0	0	0	0	0	0	0
China_rumen1705	0	0	0	1	0	1	0	1	0	0	1	0	1	0	0	0	0	0	0	0	0	0	0	0	0	0	0	0	0	0	0	0	0	0	0	0	0	0	0	0	1	0	0	0	0	0	0	0	0
China_rumen1706	0	0	0	0	0	1	0	0	0	0	0	0	0	0	0	0	0	0	0	0	0	0	0	0	0	0	0	0	0	0	0	0	0	0	0	0	0	0	0	0	1	0	0	0	0	0	0	0	0
China_rumen1708	0	0	0	0	0	0	0	0	0	0	1	0	0	0	0	0	0	0	0	0	0	0	0	0	0	0	0	0	0	0	0	0	0	0	0	0	0	0	0	0	1	0	0	0	0	0	0	0	0
China_rumen1709	0	0	0	1	0	1	1	1	0	0	1	0	0	0	0	0	1	0	0	0	0	0	0	0	0	0	0	0	0	0	0	0	0	0	0	0	0	0	0	0	0	0	0	0	0	0	0	0	0
China_rumen171	0	0	0	0	0	1	0	0	0	0	1	0	0	0	0	0	0	0	0	0	0	0	0	0	0	0	0	0	0	0	0	0	0	0	0	0	0	0	0	0	1	0	0	0	0	0	0	0	0
China_rumen1710	0	0	0	0	0	1	1	2	1	0	0	0	0	0	0	0	0	0	0	0	0	0	0	0	0	0	0	0	0	0	0	0	0	0	0	0	0	0	0	0	0	0	0	0	0	0	0	0	0
China_rumen1711	0	0	0	0	0	1	0	0	0	0	0	0	0	0	0	0	0	0	0	0	0	0	0	0	0	0	0	0	0	0	0	0	0	0	0	0	0	0	0	0	1	0	0	0	0	0	0	0	0
China_rumen1712	0	0	0	0	0	0	0	1	1	0	0	0	0	0	0	0	0	0	0	0	0	0	0	0	0	1	0	0	0	1	0	2	0	0	0	0	0	0	0	0	0	1	1	2	0	0	0	0	0
China_rumen1713	0	0	0	0	0	0	0	0	0	0	0	0	0	0	0	0	0	0	0	0	0	0	0	0	0	0	0	0	0	0	0	0	0	0	0	0	0	0	0	0	0	1	0	0	0	0	0	0	0
China_rumen1714	0	0	0	0	1	2	0	0	0	0	0	0	0	0	0	0	0	0	0	0	0	0	0	0	0	0	0	0	0	0	0	0	0	0	0	0	0	0	0	0	0	0	0	0	0	0	0	0	0
China_rumen1715	0	0	0	1	0	0	1	1	0	0	1	0	0	0	0	0	2	0	0	0	0	0	0	0	0	0	0	0	0	0	0	0	0	0	0	0	0	0	0	0	1	0	0	0	0	0	0	0	0
China_rumen1716	0	0	0	1	0	0	0	0	0	0	1	0	1	0	0	0	0	0	0	0	0	0	0	0	0	0	0	0	0	0	0	0	0	0	0	0	0	0	0	0	1	0	0	0	0	0	0	0	0
China_rumen1717	0	0	0	1	0	1	0	1	0	0	1	0	0	0	0	0	0	0	0	0	0	0	0	0	0	0	0	0	0	0	0	0	0	0	0	0	0	0	0	0	1	0	0	0	0	0	0	0	0
China_rumen1718	0	0	0	0	0	1	0	1	0	0	0	0	0	0	0	0	0	0	0	0	0	0	0	0	0	0	0	0	0	0	0	0	0	0	0	0	0	0	0	0	0	0	0	0	0	0	0	0	0
China_rumen1719	0	0	0	0	0	1	1	1	0	0	0	0	0	0	0	0	1	0	0	0	0	0	0	0	0	0	0	0	0	0	0	0	0	0	0	0	0	0	0	0	0	0	0	0	0	0	0	0	0
China_rumen172	0	0	0	0	0	0	0	1	0	0	1	0	0	0	0	0	0	0	0	0	0	0	0	0	0	0	0	0	0	0	0	0	0	0	0	0	1	0	0	0	1	0	0	0	0	0	0	0	0
China_rumen1720	0	0	0	0	0	1	0	1	0	0	0	0	1	0	1	0	0	0	0	0	0	0	0	0	0	0	0	0	0	0	0	0	0	0	0	0	0	0	0	0	0	0	0	0	0	0	0	0	0
China_rumen1721	0	0	0	0	0	2	1	1	0	0	0	0	0	0	0	0	0	0	0	0	0	0	0	0	0	0	0	0	0	0	0	0	0	0	0	0	0	0	0	0	1	0	0	0	0	0	0	0	1
China_rumen1722	0	0	0	0	0	1	0	2	0	0	1	0	0	0	0	0	0	0	0	0	0	0	0	0	0	0	0	0	0	0	0	0	0	0	0	0	0	0	0	0	1	0	0	0	0	0	0	0	0
China_rumen1723	0	0	0	0	0	0	0	1	0	0	0	0	0	0	0	1	0	0	0	0	0	0	0	0	0	0	0	0	0	0	0	0	0	0	0	0	0	0	0	0	0	0	0	0	0	0	0	0	0
China_rumen1724	0	0	1	0	0	1	1	2	0	0	1	0	0	0	0	0	2	0	0	0	0	0	0	0	0	0	0	0	0	0	0	0	0	0	0	0	0	0	0	0	0	0	0	0	0	0	0	0	0
China_rumen1725	0	0	0	0	0	0	0	0	0	0	0	0	0	0	0	0	0	0	0	0	0	0	0	0	0	0	0	0	0	0	1	0	0	0	0	0	0	0	0	0	0	0	0	3	0	0	0	2	0
China_rumen1726	0	0	0	0	0	2	1	1	1	0	0	0	0	0	0	0	0	0	0	0	0	0	0	0	0	0	0	0	0	0	0	0	0	0	0	0	0	0	0	0	0	0	0	0	0	0	0	0	0
China_rumen1727	0	0	0	0	0	1	0	1	0	0	1	0	0	0	0	1	0	0	0	0	0	0	0	0	0	0	0	0	0	0	0	0	0	0	0	0	0	0	0	0	1	0	0	0	0	0	0	0	0
China_rumen1728	1	1	0	0	0	1	0	1	0	0	0	0	0	0	0	0	0	0	0	0	0	0	0	0	0	0	0	0	0	0	0	0	0	0	0	0	0	0	0	0	1	0	0	0	0	0	0	0	0
China_rumen1729	0	0	0	1	0	0	0	1	0	0	1	0	0	0	0	0	1	0	0	0	0	0	0	0	0	0	0	0	0	0	0	0	0	0	0	0	0	0	0	0	0	0	0	0	0	0	0	0	0
China_rumen173	0	0	0	0	0	0	1	1	0	0	1	0	1	0	0	0	0	0	0	0	0	0	0	0	0	0	0	0	0	0	0	0	0	0	0	0	0	0	0	0	1	0	0	0	0	0	1	0	0
China_rumen1730	0	0	0	1	0	1	1	2	0	0	0	0	0	0	0	0	0	0	0	0	0	0	0	0	0	0	0	0	0	0	0	0	0	0	0	0	0	0	0	0	0	0	0	0	0	0	0	0	0
China_rumen1731	0	0	0	0	0	1	0	1	0	0	0	0	0	0	0	0	0	0	0	0	0	0	0	0	0	0	0	0	0	0	0	0	0	0	0	0	0	0	0	0	0	0	0	0	0	0	0	0	0
China_rumen1732	0	0	0	1	0	0	0	1	0	0	1	0	0	0	0	0	0	0	0	0	0	0	0	0	0	0	0	0	0	0	0	0	0	0	0	0	0	0	0	0	1	0	0	0	0	0	0	0	0
China_rumen1733	0	0	0	0	0	0	1	2	1	0	0	0	0	0	0	0	0	0	0	0	0	0	0	0	0	0	0	0	0	0	0	0	0	0	0	0	0	0	0	0	0	0	0	0	0	0	0	0	0
China_rumen1734	0	0	0	0	0	1	0	1	1	1	0	0	0	0	0	0	0	0	0	0	0	0	0	0	0	0	0	0	0	0	0	0	0	0	0	0	0	0	0	0	0	0	0	0	0	0	0	0	0
China_rumen1735	0	0	0	0	0	1	1	1	0	0	1	0	0	0	0	0	0	0	0	0	0	0	0	0	0	0	0	0	0	0	0	0	0	0	0	0	0	0	0	0	2	0	0	0	0	0	0	0	0
China_rumen1736	0	0	0	1	0	0	0	0	0	0	0	0	0	0	0	0	0	0	0	0	0	0	0	0	0	0	0	0	0	0	0	0	0	0	0	0	0	0	0	0	0	0	0	0	0	0	0	0	0
China_rumen1737	1	1	0	0	0	1	0	1	0	0	1	0	0	0	0	0	0	0	0	0	0	0	0	0	0	0	0	0	0	0	0	0	0	0	0	0	0	0	0	0	2	0	0	0	0	0	0	0	0
China_rumen1738	0	0	0	0	0	2	1	1	0	0	0	0	0	0	0	0	0	0	0	0	0	0	0	0	0	0	0	0	0	0	0	0	0	0	0	0	0	0	0	0	0	0	0	0	0	0	0	0	0
China_rumen1739	0	0	0	0	0	1	0	1	0	0	1	0	0	0	0	0	0	0	0	0	0	0	0	0	0	0	0	0	0	0	0	0	0	0	0	0	0	0	0	0	1	0	0	0	1	1	0	2	0
China_rumen174	0	0	0	0	0	1	0	0	0	0	0	0	0	0	0	0	0	0	0	0	0	0	0	0	0	0	0	0	0	0	0	0	0	0	0	0	0	0	0	0	0	0	0	0	0	0	0	0	0
China_rumen1740	0	0	0	0	0	1	0	0	1	0	0	0	0	0	0	0	0	0	0	0	0	0	0	0	0	0	0	0	0	0	0	0	0	0	0	0	0	0	0	0	0	0	0	0	0	0	0	0	0
China_rumen1741	0	0	0	0	0	1	0	0	0	0	1	0	0	0	0	0	0	0	0	0	0	0	0	0	0	0	0	0	0	0	0	0	0	0	0	0	0	0	0	0	1	0	0	0	0	0	0	0	0
China_rumen1742	1	1	0	1	0	0	1	2	0	0	1	0	1	0	0	0	0	0	0	0	0	0	0	0	0	0	0	0	0	0	0	0	0	0	0	0	0	0	0	0	1	0	0	0	0	0	0	0	0
China_rumen1743	0	0	0	1	0	0	0	1	0	0	0	0	0	0	0	0	0	0	0	0	0	0	0	0	0	0	0	0	0	0	0	0	0	0	0	0	0	0	0	0	0	0	0	0	0	0	0	0	0
China_rumen1744	0	0	0	0	0	1	0	1	0	0	1	0	0	0	0	0	0	0	0	0	0	0	0	0	0	0	0	0	0	0	0	0	0	0	0	0	0	0	0	0	1	0	0	0	0	0	0	0	0
China_rumen1745	0	0	0	0	0	1	0	0	0	0	0	0	0	0	0	0	0	0	0	0	0	0	0	0	0	0	0	0	0	0	0	0	0	0	0	0	0	0	0	0	2	0	0	0	0	0	0	0	0
China_rumen1746	0	0	0	0	0	0	0	0	0	0	0	0	0	0	0	0	0	1	0	0	0	0	0	0	0	0	0	0	0	0	0	0	0	0	0	0	0	0	0	0	0	0	0	0	0	0	0	0	0
China_rumen1747	0	0	0	0	0	2	0	0	1	0	0	0	0	0	0	0	0	0	0	0	0	0	0	0	0	0	0	0	0	0	0	0	0	0	0	0	0	0	0	0	0	0	0	0	0	0	0	0	0
China_rumen1749	0	0	0	0	0	2	0	1	2	0	0	0	0	0	0	0	0	0	0	0	0	0	0	0	0	0	0	0	0	0	0	0	0	0	0	0	0	0	0	0	0	0	0	0	0	0	0	0	0
China_rumen175	0	0	0	1	0	0	1	1	0	0	1	0	0	0	0	0	0	0	0	0	0	0	0	0	0	0	0	0	0	0	0	0	0	0	0	0	0	0	0	0	0	0	0	0	0	0	0	0	0
China_rumen1750	0	0	0	0	0	0	0	0	0	0	0	0	0	0	0	0	0	0	0	0	0	0	0	0	0	0	0	0	0	0	0	0	0	0	0	0	0	0	0	0	0	0	0	0	0	0	0	0	0
China_rumen1751	0	0	0	0	0	1	0	0	0	0	1	0	0	0	0	0	1	0	0	0	0	0	0	0	0	0	0	0	0	0	0	0	0	0	0	0	0	0	0	0	1	0	0	0	0	0	0	0	0
China_rumen1752	0	0	0	0	0	1	1	2	0	0	1	0	0	0	0	0	0	0	0	0	0	0	0	0	0	0	0	0	0	0	0	0	0	0	0	0	0	0	0	0	1	0	0	0	0	0	0	0	0
China_rumen1753	0	0	0	0	0	2	0	1	1	0	0	0	0	0	0	0	0	0	0	0	0	0	0	0	0	0	0	0	0	0	0	0	0	0	0	0	0	0	0	0	0	0	0	0	0	0	0	0	0
China_rumen1754	0	0	0	0	1	2	0	0	1	0	0	0	0	0	0	0	0	0	0	0	0	0	0	0	0	0	0	0	0	0	0	0	0	0	0	0	0	0	0	0	0	0	0	0	0	0	0	0	0
China_rumen1755	0	0	0	0	0	2	1	2	1	0	0	0	0	0	0	0	0	0	0	0	0	0	0	0	0	0	0	0	0	0	0	0	0	0	0	0	0	0	0	0	0	0	0	0	0	0	0	0	0
China_rumen1756	0	0	0	0	0	1	0	0	0	0	0	0	0	0	0	0	0	0	0	0	0	0	0	0	0	0	0	0	0	0	0	0	0	0	0	0	0	0	0	0	0	0	0	0	0	0	0	0	0
China_rumen1757	0	0	0	0	0	0	0	0	0	0	1	0	0	0	0	0	0	0	0	0	0	0	0	0	0	0	0	0	0	0	0	0	0	0	0	0	0	0	0	0	1	0	0	0	0	0	0	0	0
China_rumen1758	0	1	0	0	0	1	1	1	0	0	0	0	1	0	0	0	0	0	0	0	0	0	0	0	0	0	0	0	0	0	0	0	0	0	0	0	0	0	0	0	0	0	0	0	0	0	0	0	0
China_rumen1759	0	0	0	0	0	1	0	0	0	0	0	0	0	0	0	0	0	0	0	0	0	0	0	0	0	0	0	0	0	0	0	0	0	0	0	0	0	0	0	0	2	0	0	0	0	0	0	0	0
China_rumen176	0	0	0	0	0	0	0	1	2	0	1	0	0	0	0	0	0	0	0	0	0	0	0	0	0	0	0	0	0	0	0	0	0	0	0	0	0	0	0	0	1	0	0	0	0	0	0	0	0
China_rumen1760	0	0	0	0	0	1	0	0	0	0	0	0	0	0	0	0	0	0	0	0	0	0	0	0	0	0	0	0	0	0	0	0	0	0	0	0	0	0	0	0	0	0	0	0	0	0	0	0	0
China_rumen1761	0	0	0	0	0	0	1	2	0	0	0	0	0	0	0	0	0	0	0	0	0	0	0	0	0	0	0	0	0	0	0	0	0	0	0	0	0	0	0	0	1	0	0	0	0	0	0	0	0
China_rumen1762	0	0	0	0	0	2	0	1	1	0	0	0	0	0	0	0	0	0	0	0	0	0	0	0	0	0	0	0	0	0	0	0	0	0	0	0	0	0	0	0	0	0	0	0	0	0	0	0	0
China_rumen1763	0	0	0	0	0	0	0	1	0	0	0	0	0	0	0	0	0	0	0	0	0	0	0	0	0	0	0	0	0	0	0	0	0	0	0	0	0	0	0	0	0	0	0	0	0	0	0	0	0
China_rumen1764	0	0	0	0	0	1	0	0	1	0	0	0	0	0	0	0	0	0	0	0	0	0	0	0	0	0	0	0	0	0	0	0	0	0	0	0	0	0	0	0	0	0	0	0	0	0	0	0	0
China_rumen1765	0	0	0	0	0	0	0	0	0	0	0	0	0	0	0	0	0	0	0	0	0	0	0	0	0	0	0	0	0	0	0	0	0	0	0	0	0	0	0	0	0	0	0	0	0	0	0	0	0
China_rumen1766	0	0	0	0	0	0	0	0	0	0	0	0	0	0	0	0	0	0	0	0	0	0	0	0	0	0	0	0	0	0	0	0	0	0	0	0	0	0	0	0	0	0	0	0	0	0	0	0	0
China_rumen1767	0	0	1	1	0	1	1	1	0	0	1	0	1	0	0	0	1	1	0	0	0	0	0	0	0	0	0	0	0	0	0	0	0	0	0	0	0	0	0	0	1	0	0	0	0	0	0	0	0
China_rumen1768	0	0	0	0	0	1	0	0	1	0	0	0	0	0	0	0	0	0	0	0	0	0	0	0	0	0	0	0	0	0	0	0	0	0	0	0	0	0	0	0	0	0	0	0	0	0	0	0	0
China_rumen1769	0	0	0	0	0	1	1	1	2	0	0	0	0	0	0	0	0	0	0	0	0	0	0	0	0	0	0	0	0	0	0	0	0	0	0	0	0	0	0	0	0	0	0	0	0	0	0	0	0
China_rumen177	0	0	0	0	0	3	0	1	0	0	0	0	0	0	0	0	0	0	0	0	0	0	0	0	0	0	0	0	0	0	0	0	0	0	0	0	0	0	0	0	0	0	0	0	0	0	0	0	0
China_rumen1770	0	0	0	0	0	1	0	1	0	0	0	0	0	0	0	0	0	0	0	0	0	0	0	0	0	0	0	0	0	0	0	0	0	0	0	0	0	0	0	0	0	0	0	0	0	0	0	0	0
China_rumen1771	0	0	0	0	0	2	0	1	0	0	0	0	0	0	0	0	0	0	0	0	0	0	0	0	0	0	0	0	0	0	0	0	0	0	0	0	0	0	0	0	0	0	0	0	0	0	0	0	0
China_rumen1772	0	0	0	1	0	0	0	2	0	0	0	0	0	0	0	0	0	0	0	0	0	0	0	0	0	0	0	0	0	0	0	0	0	0	0	0	0	0	0	0	0	0	0	0	0	0	0	0	0
China_rumen1773	0	0	0	0	0	2	0	1	0	0	0	0	0	0	0	0	0	0	0	0	0	0	0	0	0	0	0	0	0	0	0	0	0	0	0	0	0	0	0	0	0	0	0	0	0	0	0	0	0
China_rumen1774	0	0	0	0	0	0	0	0	0	0	1	0	0	0	0	1	0	0	0	0	0	0	0	0	0	0	0	0	0	0	0	0	0	0	0	0	0	0	0	0	0	0	0	0	0	0	0	0	0
China_rumen1776	0	0	0	1	0	1	0	0	0	0	1	0	0	0	0	0	0	0	0	0	0	0	0	0	0	0	0	0	0	0	0	0	0	0	0	0	0	0	0	0	1	0	0	0	0	0	0	0	0
China_rumen1777	0	0	0	0	0	1	0	0	0	0	1	0	0	0	0	0	0	0	0	0	0	0	0	0	0	0	0	0	0	0	0	0	0	0	0	0	0	0	0	0	1	0	0	0	0	0	0	0	0
China_rumen1778	0	0	0	0	1	2	0	1	1	0	0	0	0	0	0	0	0	0	0	0	0	0	0	0	0	0	0	0	0	0	0	0	0	0	0	0	0	0	0	0	0	0	0	0	0	0	0	0	0
China_rumen178	0	0	0	0	0	2	0	0	1	0	0	0	0	0	0	0	0	0	0	0	0	0	0	0	0	0	0	0	0	0	0	0	0	0	0	0	0	0	0	0	0	0	0	0	0	0	0	0	0
China_rumen1780	0	0	0	0	0	1	0	0	0	0	0	0	0	0	0	0	0	0	0	0	0	0	0	0	0	0	0	0	0	0	0	0	0	0	0	0	0	0	0	0	0	0	0	0	0	0	0	0	0
China_rumen1781	0	0	0	0	0	1	0	0	0	0	1	0	0	0	0	0	0	0	0	0	0	0	0	0	0	0	0	0	0	0	0	0	0	0	0	0	0	0	0	0	1	0	0	0	0	0	0	0	0
China_rumen1782	0	0	0	0	0	1	0	1	0	0	0	0	0	0	0	1	0	0	0	0	0	0	0	0	0	0	0	0	0	0	0	0	0	0	0	0	0	0	0	0	1	0	0	0	0	0	0	0	0
China_rumen1783	0	0	0	0	0	0	1	2	0	0	0	0	0	0	0	1	0	0	0	0	0	0	0	0	0	0	0	0	0	0	0	0	0	0	0	0	0	0	0	0	2	0	0	0	0	0	0	0	0
China_rumen1784	0	0	1	1	0	0	0	0	0	0	0	0	1	0	0	0	1	0	0	0	0	0	0	0	0	0	0	0	0	0	0	0	0	0	0	0	0	0	0	0	0	0	0	0	0	0	0	0	0
China_rumen1785	0	0	0	0	0	1	0	1	0	0	1	0	0	0	0	0	0	0	0	0	0	0	0	0	0	0	0	0	0	0	0	0	0	0	0	0	0	0	0	0	1	0	0	0	0	0	0	0	0
China_rumen1786	0	0	0	0	0	1	0	0	0	0	0	0	0	0	0	0	0	0	0	0	0	0	0	0	0	0	0	0	0	0	0	0	0	0	0	0	0	0	0	0	0	0	0	0	0	0	0	0	0
China_rumen1787	0	0	0	0	0	0	0	1	0	0	0	0	0	0	0	0	0	0	0	0	0	0	0	0	0	0	0	0	0	0	0	0	0	0	0	0	0	0	0	0	0	0	0	0	0	0	0	0	0
China_rumen1789	0	0	0	0	1	1	0	0	0	1	0	0	0	0	0	0	0	0	0	0	0	0	0	0	0	0	0	0	0	0	0	0	0	0	0	0	1	0	0	0	0	0	0	0	0	0	0	0	0
China_rumen179	0	0	0	0	0	2	1	1	0	0	1	0	1	0	0	0	1	1	0	0	0	0	0	0	0	0	0	0	0	0	0	0	0	0	0	0	0	0	0	0	1	0	0	0	0	0	0	0	0
China_rumen1790	0	0	0	0	0	0	0	1	0	0	0	0	0	0	0	0	0	0	0	0	0	0	0	0	0	0	0	0	0	0	0	0	0	0	0	0	0	0	0	0	0	0	0	0	0	0	0	0	0
China_rumen1791	0	0	0	0	0	1	0	1	0	0	1	0	0	0	0	0	0	0	0	0	0	0	0	0	0	0	0	0	0	0	0	0	0	0	0	0	0	0	0	0	1	0	0	0	0	0	0	0	0
China_rumen1792	0	0	0	0	0	1	0	1	1	0	0	0	0	0	0	0	0	0	0	0	0	0	0	0	0	0	0	0	0	0	0	0	0	0	0	0	0	0	0	0	0	0	0	0	0	0	0	0	0
China_rumen1793	0	0	1	0	0	1	1	2	0	0	0	0	0	0	0	0	0	0	0	0	0	0	0	0	0	1	0	0	0	0	0	0	0	0	0	0	0	0	0	0	0	0	0	0	0	0	0	0	0
China_rumen1794	0	0	0	0	0	2	0	0	0	0	1	0	0	0	0	0	0	0	0	0	0	0	0	0	0	0	0	0	0	0	0	0	0	0	0	0	0	0	0	0	1	0	0	0	0	0	0	0	0
China_rumen1795	0	0	0	0	0	1	0	0	0	0	1	0	0	0	0	0	0	0	0	0	0	0	0	0	0	0	0	0	0	0	0	0	0	0	0	0	0	0	0	0	1	0	0	0	0	0	0	0	0
China_rumen1796	1	1	0	0	0	1	0	1	0	0	1	0	0	0	0	0	0	0	0	0	0	0	0	0	0	0	0	0	0	0	0	0	0	0	0	0	0	0	0	0	1	0	0	0	0	0	0	0	0
China_rumen1797	1	1	0	0	0	1	1	2	0	0	1	0	1	0	0	0	0	0	0	0	0	0	0	0	0	0	0	0	0	0	0	0	0	0	0	0	0	0	0	0	0	0	0	0	0	0	0	0	0
China_rumen1798	0	0	1	1	0	1	0	0	0	0	0	0	0	0	0	0	1	0	0	0	0	0	0	0	0	0	0	0	0	0	0	0	0	0	0	0	0	0	0	0	0	0	0	0	0	0	0	0	0
China_rumen1799	0	0	0	0	1	1	0	1	0	0	0	0	0	0	0	0	0	0	0	0	0	0	0	0	0	0	0	0	0	0	0	0	0	0	0	0	0	0	0	0	0	0	0	0	0	0	0	0	0
China_rumen18	0	0	0	0	0	1	0	0	0	0	1	0	0	0	0	0	0	0	0	0	0	0	0	0	0	0	0	0	0	0	0	0	0	0	0	0	0	0	0	0	0	0	0	0	0	0	0	0	0
China_rumen180	0	0	0	3	0	0	1	2	0	0	1	0	1	0	0	0	1	0	0	0	0	0	0	0	0	0	0	0	0	0	0	0	0	0	0	0	0	0	0	0	2	0	0	0	1	1	0	0	0
China_rumen1800	0	0	0	0	0	0	0	0	0	0	1	0	0	0	0	0	0	0	0	0	0	0	0	0	0	0	0	0	0	0	0	0	0	0	0	0	0	0	0	0	2	0	0	0	0	0	0	0	0
China_rumen1801	0	0	0	0	0	1	0	0	0	0	0	0	0	0	0	0	0	0	0	0	0	0	0	0	0	0	0	0	0	0	0	0	0	0	0	0	0	0	0	0	0	0	0	0	0	0	0	0	0
China_rumen1802	1	0	0	0	0	0	0	0	0	0	1	0	0	0	0	0	0	0	0	0	0	0	0	0	0	0	0	0	0	0	0	0	0	0	0	0	0	0	0	0	0	0	0	0	0	0	0	0	0
China_rumen1803	0	0	0	0	0	0	0	2	0	0	2	0	0	0	0	0	0	0	0	0	0	0	0	0	0	0	0	0	0	0	0	0	0	0	0	0	0	0	0	0	1	0	0	0	0	0	0	0	0
China_rumen1804	0	0	0	0	0	0	0	1	0	0	0	0	2	0	0	0	1	0	0	0	0	0	0	0	0	0	0	0	0	0	0	0	0	0	0	0	0	0	0	0	1	0	0	0	0	0	0	0	0
China_rumen1805	0	0	0	0	0	1	0	1	1	0	0	0	0	0	0	0	0	0	0	0	0	0	0	0	0	0	0	0	0	0	0	0	0	0	0	0	0	0	0	0	0	0	0	0	0	0	0	0	0
China_rumen1806	0	1	0	0	0	1	1	2	0	0	0	0	0	0	0	0	0	0	0	0	0	0	0	0	0	1	0	0	0	0	0	0	0	0	0	0	0	0	0	0	0	0	0	0	0	0	0	0	0
China_rumen1807	0	0	0	0	1	1	0	0	0	0	0	0	0	0	0	0	0	0	0	0	0	0	0	0	0	0	0	0	0	0	0	0	0	0	0	0	0	0	0	0	0	0	0	0	0	0	0	0	0
China_rumen1808	0	0	0	0	0	1	0	0	0	0	0	0	0	0	0	0	0	0	0	0	0	0	0	1	0	0	0	0	0	0	0	0	0	0	0	0	0	0	0	0	0	0	0	0	0	0	0	0	0
China_rumen1809	0	0	0	0	0	0	0	0	0	0	1	0	0	0	0	0	0	0	0	0	0	0	0	0	0	0	0	0	0	0	0	0	0	0	0	0	0	0	0	0	2	0	0	0	0	0	0	0	0
China_rumen181	2	0	0	0	0	1	0	0	0	0	0	0	0	0	0	0	0	0	0	0	0	0	0	0	0	0	0	0	0	0	0	0	0	0	0	0	0	0	0	0	0	0	0	0	0	0	0	0	0
China_rumen1810	0	0	0	0	0	1	0	0	0	0	0	0	0	0	0	0	0	0	0	0	0	0	0	0	0	0	0	0	0	0	0	0	0	0	0	0	0	0	0	0	0	0	0	0	1	1	0	0	0
China_rumen1811	0	0	0	0	0	2	0	0	0	0	1	0	1	0	0	0	0	0	0	0	0	0	0	0	0	0	0	0	0	0	0	0	0	0	0	0	0	0	0	0	1	0	0	0	0	0	0	0	0
China_rumen1812	0	0	0	0	0	1	0	1	0	0	1	0	0	0	0	0	0	0	0	0	0	0	0	0	0	0	0	0	0	0	0	0	0	0	0	0	0	0	0	0	0	0	0	0	0	0	0	0	0
China_rumen1813	0	0	0	0	1	0	0	1	1	0	0	0	0	0	0	0	0	0	0	0	0	0	0	0	0	0	0	0	0	0	0	0	0	0	0	0	0	0	0	0	0	0	0	0	0	0	0	0	0
China_rumen1814	0	0	0	0	0	1	1	0	0	0	0	0	0	0	2	0	0	0	0	0	1	0	0	0	0	1	0	0	0	0	0	0	0	0	0	0	0	0	0	0	0	0	0	0	0	0	0	0	0
China_rumen1815	0	0	0	0	0	1	0	0	0	0	0	0	0	0	0	0	0	0	0	0	0	0	0	0	0	0	0	0	0	0	0	0	0	0	0	0	0	0	0	0	0	0	0	0	1	1	0	1	0
China_rumen1816	0	0	0	0	0	1	0	0	0	0	0	0	0	0	0	0	0	0	0	0	0	0	0	0	0	0	0	0	0	0	0	0	0	0	0	0	0	0	0	0	0	0	0	0	0	0	0	0	0
China_rumen1818	0	0	0	0	0	1	0	1	0	0	1	0	0	0	0	0	0	0	0	0	0	0	0	0	0	0	0	0	0	0	0	0	0	0	0	0	0	0	0	0	1	0	0	0	0	0	0	0	0
China_rumen1819	0	0	0	0	0	1	0	0	0	0	0	0	0	0	0	0	0	0	0	0	0	0	0	0	0	0	0	0	0	0	1	0	0	0	0	0	0	0	0	0	0	0	0	1	0	0	0	0	0
China_rumen182	0	0	0	0	0	0	0	0	0	0	0	0	0	0	0	1	0	0	0	0	0	0	0	0	0	0	0	0	0	0	0	0	0	0	0	0	0	0	0	0	0	0	0	0	0	0	0	0	0
China_rumen1820	0	0	0	0	0	0	0	0	1	0	0	0	0	0	0	0	0	0	0	0	0	0	0	0	0	0	0	0	0	0	0	0	0	0	0	0	0	0	0	0	1	0	0	0	0	0	0	0	0
China_rumen1821	0	0	0	0	1	1	0	0	0	0	0	0	0	0	1	0	0	0	0	0	0	0	0	0	0	1	0	0	0	0	0	0	0	0	0	0	0	0	0	0	0	0	0	0	0	0	0	1	1
China_rumen1823	0	0	0	0	0	0	0	1	0	0	0	0	0	0	0	0	0	0	0	0	0	0	0	0	0	0	0	0	0	0	0	0	0	0	0	0	0	0	0	0	0	0	0	0	0	0	0	0	0
China_rumen1824	0	0	0	0	0	2	0	0	0	0	1	0	0	0	0	0	0	0	0	0	0	0	0	0	0	0	0	0	0	0	0	0	0	0	0	0	0	0	0	0	4	0	0	0	0	0	0	0	0
China_rumen1825	0	0	0	0	0	0	0	1	0	0	0	0	0	0	0	1	0	0	0	0	0	0	0	0	0	0	0	0	0	0	0	0	0	0	0	0	0	0	0	0	0	0	0	0	0	0	0	0	0
China_rumen1826	0	0	0	0	0	0	0	1	0	0	0	0	0	0	0	0	0	0	0	0	0	0	0	0	0	0	0	0	0	0	0	0	0	0	0	0	0	0	0	0	0	0	0	0	0	0	0	0	0
China_rumen1827	0	0	0	0	0	2	0	0	0	0	1	0	0	0	0	0	0	0	0	0	0	0	0	0	0	0	0	0	0	0	0	0	0	0	0	0	0	0	0	0	2	0	0	0	0	0	0	0	0
China_rumen1828	0	0	0	0	0	1	0	0	1	0	0	0	0	0	0	0	0	0	0	0	0	0	0	0	0	0	0	0	0	0	0	0	0	0	0	0	0	0	0	0	0	0	0	0	0	0	0	0	0
China_rumen1829	0	0	0	0	0	1	0	1	2	0	0	0	0	2	1	0	0	0	0	0	0	0	0	1	0	0	0	0	0	0	0	0	0	0	0	0	0	0	0	0	0	0	0	0	0	0	0	0	0
China_rumen183	0	0	0	1	0	0	0	1	0	0	0	0	0	0	0	1	0	0	0	0	0	0	0	0	0	0	0	0	0	0	0	0	0	0	0	0	0	0	0	0	0	0	0	0	0	0	0	0	0
China_rumen1830	0	0	0	0	0	1	0	0	0	0	0	0	0	0	0	0	0	0	0	0	0	0	0	0	0	0	0	0	0	0	0	0	0	0	0	0	0	0	0	0	0	0	0	0	0	0	0	0	0
China_rumen1831	1	0	0	0	0	0	0	1	0	0	0	0	0	0	0	0	1	0	0	0	0	0	0	0	0	0	0	0	0	0	0	0	0	0	0	0	0	0	0	0	1	0	0	0	0	0	0	0	0
China_rumen1832	0	0	0	0	0	1	0	0	0	1	0	0	0	0	0	0	0	0	0	0	0	0	0	0	0	0	0	0	0	0	0	0	0	0	0	0	0	0	0	0	0	0	0	0	0	0	0	0	0
China_rumen1833	0	0	0	0	0	1	1	1	1	0	0	0	0	0	0	0	0	0	0	0	0	0	0	0	0	0	0	0	0	0	0	0	0	0	0	0	0	0	0	0	0	0	0	0	0	0	0	0	0
China_rumen1834	0	0	0	1	0	0	0	0	0	0	0	0	0	0	0	0	0	0	0	0	0	0	0	0	0	0	0	0	0	0	0	0	0	0	0	0	0	0	0	0	0	0	0	0	0	0	0	0	0
China_rumen1835	0	0	0	0	0	0	0	0	0	0	0	0	0	0	0	0	0	0	0	0	0	0	0	0	0	0	0	0	0	0	0	0	0	0	0	0	0	0	0	0	0	0	0	0	0	0	0	0	0
China_rumen1836	0	0	0	1	0	1	0	0	0	0	1	0	0	0	0	1	0	0	0	0	0	0	0	0	0	0	0	0	0	0	0	0	0	0	0	0	0	0	0	0	2	0	0	0	0	0	0	0	0
China_rumen1837	0	0	0	1	0	1	0	1	0	0	0	0	0	0	0	0	0	0	0	0	0	0	0	0	0	0	0	0	0	0	0	0	0	0	0	0	0	0	0	0	1	0	0	0	0	0	0	0	0
China_rumen1839	0	0	0	0	0	1	0	0	0	0	1	0	0	0	0	0	0	0	0	0	0	0	0	0	0	0	0	0	0	0	0	0	0	0	0	0	0	0	0	0	1	0	0	0	0	0	0	0	0
China_rumen184	0	0	0	1	0	0	0	2	0	0	0	0	0	0	0	0	0	0	0	0	0	0	0	0	0	1	0	0	0	0	0	0	0	0	0	0	0	0	0	0	0	0	0	0	0	0	0	0	0
China_rumen1840	0	0	1	2	0	0	1	3	0	0	0	0	0	0	0	0	0	0	0	0	0	0	0	0	0	0	0	0	0	0	0	0	0	0	0	0	0	0	0	0	0	0	0	0	0	0	0	0	0
China_rumen1841	0	0	0	0	0	1	0	0	0	0	0	0	0	0	0	0	0	0	0	0	0	0	0	0	0	0	0	0	0	0	0	0	0	0	0	0	0	0	0	0	0	0	0	0	0	0	0	0	0
China_rumen1842	0	0	0	0	0	0	0	1	0	0	0	0	0	0	0	1	1	0	0	0	0	0	0	0	0	0	0	0	0	0	0	0	0	0	0	0	0	0	0	0	0	0	0	0	0	0	0	0	0
China_rumen1843	0	0	0	0	0	1	1	2	1	0	0	0	0	0	0	0	0	0	0	0	0	0	0	0	0	0	0	0	0	0	0	0	0	0	0	0	0	0	0	0	0	0	0	0	0	0	0	0	0
China_rumen1844	0	0	0	0	0	1	0	0	1	0	0	0	0	1	0	0	0	0	0	0	0	0	0	0	0	0	0	0	0	0	0	0	0	0	0	0	0	0	0	0	0	0	0	0	1	1	0	0	0
China_rumen1845	0	0	0	0	0	0	0	0	0	0	0	0	0	1	1	0	0	0	0	0	0	0	0	1	0	0	0	0	0	0	0	0	0	0	0	0	0	0	0	0	2	0	0	0	0	0	0	0	0
China_rumen1846	0	0	1	1	0	0	0	0	0	0	1	0	1	0	0	0	0	0	0	0	0	0	0	0	0	0	0	0	0	0	0	0	0	0	0	0	0	0	0	0	1	0	0	0	1	1	0	0	0
China_rumen1847	1	1	0	0	0	0	0	1	1	0	0	0	0	0	0	0	0	0	0	0	0	0	0	0	0	0	0	0	0	0	0	0	0	0	0	0	0	0	0	0	0	0	0	0	0	0	0	0	0
China_rumen1848	0	0	0	0	0	0	0	1	0	0	1	0	0	0	0	0	0	0	0	0	0	0	0	0	0	0	0	0	0	0	0	0	0	0	0	0	0	0	0	0	1	0	0	0	0	0	0	0	0
China_rumen1849	0	0	0	0	0	1	0	1	0	0	0	0	0	0	0	0	0	0	0	0	0	0	0	0	0	0	0	0	0	0	0	0	0	0	0	0	0	0	0	0	0	0	0	2	0	0	0	0	0
China_rumen185	0	0	0	0	0	0	0	1	0	0	1	0	0	0	0	0	0	0	0	0	0	0	0	0	0	0	0	1	0	0	0	0	0	0	0	0	0	0	0	0	1	0	0	0	0	0	0	0	0
China_rumen1850	1	1	0	0	0	0	0	1	0	0	1	0	0	0	0	0	0	0	0	0	0	0	0	0	0	0	0	0	0	0	0	0	0	0	0	0	0	0	0	0	1	0	0	0	0	0	0	0	0
China_rumen1851	0	0	0	0	0	0	0	0	0	0	1	0	0	0	0	0	0	0	0	0	0	0	0	0	0	0	0	0	0	0	0	0	0	0	0	0	0	0	0	0	1	0	0	0	0	0	0	0	0
China_rumen1852	0	0	0	0	0	0	0	0	1	0	0	0	0	0	1	0	0	0	0	0	0	0	0	1	0	0	0	0	0	0	0	0	0	0	0	0	0	0	0	0	0	0	0	0	0	0	0	0	0
China_rumen1853	0	0	0	0	0	0	0	1	0	0	0	0	0	0	0	0	0	0	0	0	0	0	0	0	0	0	0	0	0	0	0	0	0	0	0	0	0	0	0	0	1	0	0	0	0	0	0	0	0
China_rumen1854	0	0	0	0	0	1	0	0	0	0	1	0	0	1	0	0	0	0	0	0	0	0	0	0	0	0	0	0	0	0	0	0	0	0	1	0	0	0	0	0	1	0	0	0	0	0	0	0	0
China_rumen1855	0	0	0	0	0	1	0	0	0	0	0	0	0	0	0	1	0	0	0	0	0	0	0	0	0	0	0	0	0	0	0	0	0	0	0	0	0	0	0	0	1	0	0	0	0	0	0	0	0
China_rumen1856	0	0	0	0	0	0	0	2	0	0	0	0	0	0	0	0	0	0	0	0	0	0	0	0	0	0	0	0	0	0	0	0	0	0	0	0	0	0	0	0	0	0	0	0	0	0	0	0	0
China_rumen1857	0	0	0	0	0	1	0	0	0	0	1	0	0	0	0	0	0	0	0	0	0	0	0	0	0	0	0	0	0	0	0	0	0	0	0	0	0	0	0	0	0	0	0	0	0	0	0	0	0
China_rumen1858	1	1	0	0	0	2	0	1	0	0	1	0	0	0	0	0	0	0	0	0	0	0	0	0	0	0	0	0	0	0	0	0	0	0	0	0	0	0	0	0	1	0	0	0	0	0	0	0	0
China_rumen1859	0	0	0	0	0	0	0	0	0	0	0	0	0	0	0	0	0	0	0	0	0	0	0	0	0	0	0	0	0	0	0	0	0	0	0	0	0	0	0	0	0	0	0	0	0	0	0	0	0
China_rumen1860	0	0	0	1	0	0	0	0	0	0	1	0	0	0	0	0	0	0	0	0	0	0	0	0	0	0	0	0	0	0	0	0	0	0	0	0	0	0	0	0	1	0	0	0	0	0	0	0	0
China_rumen1861	0	0	0	1	0	0	0	0	0	0	0	0	0	0	0	0	0	0	0	0	0	0	0	0	0	0	0	0	0	0	0	0	0	0	0	0	0	0	0	0	0	0	0	0	0	0	0	0	0
China_rumen1862	0	0	0	0	0	0	1	1	0	0	0	0	1	0	0	0	0	0	0	0	0	0	0	0	0	0	0	0	0	0	0	0	0	0	0	0	0	0	0	0	0	0	0	0	0	0	0	0	0
China_rumen1863	0	0	0	1	0	0	0	0	0	0	1	0	0	0	0	0	0	0	0	0	0	0	0	0	0	0	0	0	0	0	0	0	0	0	0	0	0	0	0	0	1	0	0	0	0	0	0	0	0
China_rumen1864	0	1	0	0	0	0	0	1	0	0	0	0	0	0	0	0	0	0	0	0	0	0	0	0	0	0	0	0	0	0	0	0	0	0	0	0	0	0	0	0	0	0	0	0	0	0	0	0	0
China_rumen1865	0	0	0	0	0	1	0	0	0	0	1	0	0	0	0	0	0	0	0	0	0	0	0	0	0	0	0	0	0	0	0	0	0	0	0	0	0	0	0	0	0	0	0	0	0	0	0	0	0
China_rumen1866	0	0	0	1	0	0	0	1	0	0	0	0	0	0	0	0	0	0	0	0	0	0	0	0	0	0	0	0	0	0	0	0	0	0	0	0	0	0	0	0	0	0	0	0	0	0	0	0	0
China_rumen1867	0	0	0	0	0	1	0	2	0	0	1	0	0	0	0	0	0	0	0	0	0	0	0	0	0	0	0	0	0	0	0	0	0	0	0	0	0	0	0	0	2	0	0	0	0	0	0	0	0
China_rumen1868	0	0	0	0	0	1	0	0	0	0	1	0	0	0	0	0	0	0	0	0	0	0	0	0	0	0	0	0	0	0	0	0	0	0	0	0	0	0	0	0	2	0	0	0	0	0	0	0	0
China_rumen1869	0	0	0	0	0	0	0	0	0	0	0	0	0	0	0	0	0	0	0	0	0	0	0	0	0	0	0	0	0	0	0	0	0	0	0	0	0	0	0	0	1	0	0	0	0	0	0	0	0
China_rumen187	0	0	0	0	0	2	0	0	0	0	1	0	0	0	1	0	0	0	0	0	0	0	0	0	0	0	0	0	0	0	0	0	0	0	0	0	0	0	0	0	1	0	0	0	0	0	0	0	0
China_rumen1870	0	0	0	0	0	0	0	0	0	0	0	0	0	0	0	0	0	0	0	0	0	0	0	0	0	0	0	0	0	0	0	0	0	0	0	0	0	0	0	0	1	0	0	0	0	0	0	0	0
China_rumen1871	0	0	0	1	0	0	0	1	0	0	1	0	0	0	0	0	0	0	0	0	0	0	0	0	0	0	0	0	0	0	0	0	0	0	0	0	0	0	0	0	2	0	0	0	0	0	0	0	0
China_rumen1872	0	0	0	0	0	0	0	0	0	0	0	0	0	0	0	0	0	0	0	0	0	0	0	0	0	0	0	0	0	0	0	0	0	0	0	0	0	0	0	0	0	0	0	0	0	0	0	0	0
China_rumen1873	0	0	0	0	0	1	0	0	1	0	0	0	0	0	0	0	0	0	0	0	0	0	0	0	0	0	0	0	0	0	0	0	0	0	0	0	0	0	0	0	0	0	0	0	0	0	0	0	0
China_rumen1875	0	0	0	0	0	1	0	0	0	0	1	0	0	0	0	0	0	0	0	0	0	0	0	0	0	0	0	0	0	0	0	0	0	0	0	0	0	0	0	0	2	0	0	0	0	0	0	0	0
China_rumen1876	0	0	0	0	1	0	0	0	0	0	0	0	0	0	0	0	0	0	0	0	0	0	0	0	0	0	0	0	0	0	0	0	0	0	0	0	0	0	0	0	0	0	0	0	0	0	0	0	0
China_rumen1878	0	0	0	0	0	1	0	0	0	0	0	0	0	0	0	0	1	0	0	0	0	0	0	0	0	0	0	0	0	0	0	0	0	0	0	0	0	0	0	0	0	0	0	0	0	0	0	0	0
China_rumen1879	0	0	0	0	1	2	0	1	0	0	0	0	0	0	0	0	0	0	0	0	0	0	0	0	0	0	0	0	0	0	0	0	0	0	0	0	0	0	0	0	0	0	0	0	0	0	0	0	0
China_rumen188	0	0	0	1	0	0	0	0	0	0	0	0	0	0	0	0	0	0	0	0	0	0	0	0	0	0	0	0	0	0	0	0	0	0	0	0	0	0	0	0	1	0	0	0	0	0	0	0	0
China_rumen1880	0	0	0	0	0	0	0	1	1	0	0	0	0	0	0	0	0	0	0	0	0	0	0	0	0	0	0	0	0	0	0	0	0	0	0	0	0	0	0	0	0	0	0	0	0	0	0	0	0
China_rumen1881	0	0	0	1	0	0	0	1	0	0	0	0	1	0	1	0	0	0	0	0	0	0	0	0	0	0	0	0	0	0	0	0	0	0	0	0	0	0	0	0	0	0	0	0	0	0	0	0	0
China_rumen1882	0	0	0	0	0	2	0	1	1	0	0	0	0	0	0	0	0	0	0	0	0	0	0	0	0	0	0	0	0	0	0	0	0	0	0	0	0	0	0	0	0	0	0	0	0	0	0	0	0
China_rumen1883	0	0	0	0	0	0	0	1	0	0	0	0	0	0	0	0	0	0	0	0	0	0	0	0	0	0	0	0	0	0	0	0	0	0	0	0	0	0	0	0	0	0	0	0	0	0	0	0	0
China_rumen1884	0	0	0	0	0	1	0	0	0	0	0	0	1	0	0	0	0	0	0	0	0	0	0	0	0	0	0	0	0	0	0	0	0	0	0	0	0	0	0	0	0	0	0	0	0	0	0	0	0
China_rumen1885	0	0	0	1	0	1	0	1	0	0	1	0	0	0	0	0	0	0	0	0	0	0	0	0	0	0	0	0	0	0	0	0	0	0	0	0	0	0	0	0	1	0	0	0	0	0	0	0	0
China_rumen1886	0	0	0	0	0	1	0	0	0	0	0	0	0	0	0	0	0	0	0	0	0	0	0	0	0	0	0	0	0	0	0	0	0	0	0	0	0	0	0	0	1	0	0	0	0	0	0	0	0
China_rumen1887	0	2	0	0	0	2	0	0	0	0	1	0	0	0	0	0	0	0	0	0	0	0	0	0	0	0	0	0	0	0	0	0	0	0	0	0	0	0	0	0	2	0	0	0	0	0	0	0	0
China_rumen1888	0	0	0	0	0	0	0	0	0	0	0	0	0	0	0	0	0	0	0	0	0	0	0	0	0	0	0	0	0	0	0	0	0	0	0	0	0	0	0	0	0	0	0	0	0	0	0	0	0
China_rumen1889	0	0	0	0	0	1	0	0	0	0	0	0	1	0	0	0	0	1	0	0	0	0	0	0	0	0	0	0	0	0	0	0	0	0	0	0	0	0	0	0	0	0	0	0	0	0	0	0	0
China_rumen189	0	0	0	0	0	0	0	1	0	0	2	0	1	0	0	0	0	1	0	0	0	0	0	0	0	0	0	0	0	0	0	0	0	0	0	0	0	0	0	0	2	0	0	0	0	0	0	0	0
China_rumen1890	0	0	0	0	0	0	0	1	0	0	1	0	0	0	0	0	0	0	0	0	0	0	0	0	0	0	0	0	0	0	0	0	0	0	0	0	0	0	0	0	1	0	0	0	0	0	0	0	0
China_rumen1891	0	0	0	0	0	1	1	2	0	0	1	0	0	0	0	0	0	0	0	0	0	0	0	0	0	0	0	0	0	0	0	0	0	0	0	0	0	0	0	0	1	0	0	0	0	0	1	0	0
China_rumen1892	0	0	0	0	1	1	0	1	0	1	1	0	0	0	0	0	0	0	0	0	0	0	0	0	0	0	0	0	0	0	0	0	0	0	0	0	1	0	0	0	1	0	0	0	0	0	0	0	0
China_rumen1893	0	0	0	0	0	0	0	0	0	0	0	0	0	0	0	0	0	0	0	0	0	0	0	0	0	0	0	0	0	0	0	0	0	0	0	0	0	0	0	0	1	0	0	0	0	0	0	0	0
China_rumen1894	0	0	0	0	0	1	0	1	0	0	0	0	0	0	0	0	0	0	0	0	0	0	0	0	0	1	0	0	0	0	0	0	0	0	0	0	0	0	0	0	0	0	0	0	1	1	0	0	0
China_rumen1895	0	0	0	0	0	1	0	0	0	1	0	0	0	0	0	0	0	0	0	0	0	0	0	0	0	0	0	0	0	0	0	0	0	0	0	0	0	0	0	0	0	0	0	0	0	0	0	0	0
China_rumen1896	0	0	0	0	0	0	1	1	0	0	0	0	0	0	1	0	0	0	0	0	0	0	0	0	0	1	0	0	0	0	0	0	0	0	0	0	0	0	0	0	0	0	0	0	0	0	0	0	0
China_rumen1897	0	0	0	1	0	0	0	0	0	0	0	0	1	0	0	0	0	0	0	0	0	0	0	0	0	0	0	0	0	0	0	0	0	0	0	0	0	0	0	0	0	0	0	0	0	0	0	0	0
China_rumen1898	1	1	0	0	0	2	0	1	0	0	1	0	0	0	1	0	0	1	0	0	0	0	0	0	0	0	0	0	0	0	0	0	0	0	0	0	0	0	0	0	3	0	0	0	0	0	1	0	0
China_rumen1899	0	0	0	1	0	1	0	0	0	0	1	0	1	0	0	0	0	0	0	0	0	0	0	0	0	0	0	0	0	0	0	0	0	0	0	0	0	0	0	0	1	0	0	0	0	0	0	0	0
China_rumen190	0	1	0	1	0	1	0	1	0	0	1	0	1	0	0	0	0	1	0	0	0	0	0	0	0	0	0	0	0	0	0	0	0	0	0	0	0	0	0	0	2	0	0	0	0	0	0	0	0
China_rumen1900	1	0	0	0	0	1	0	1	0	0	0	0	1	0	0	0	1	0	0	0	0	0	0	0	0	0	0	0	0	0	0	0	0	0	0	0	0	0	0	0	0	0	0	0	0	0	1	0	0
China_rumen1901	0	0	0	0	0	1	0	1	0	0	0	0	0	0	0	0	0	0	0	0	0	0	0	0	0	0	0	0	0	0	0	0	0	0	0	0	0	0	0	0	0	0	0	0	0	0	0	0	0
China_rumen1902	0	0	0	0	0	1	0	0	1	0	0	0	0	0	0	0	0	0	0	0	0	0	0	0	0	0	0	0	0	0	0	0	0	0	0	0	0	0	0	0	0	0	0	0	0	0	0	0	0
China_rumen1903	0	0	0	0	0	1	0	0	0	0	0	0	0	0	0	0	0	0	0	0	0	0	0	0	0	0	0	0	0	0	0	0	0	0	0	0	0	0	0	0	0	0	0	0	0	0	0	0	0
China_rumen1904	0	0	0	0	0	1	1	0	0	0	1	0	1	0	1	0	0	1	0	0	0	0	0	0	0	0	0	0	0	0	0	0	0	0	0	0	0	0	0	0	0	0	0	0	0	0	0	0	0
China_rumen1905	1	1	0	0	0	1	0	0	1	0	0	0	0	0	0	0	0	0	0	0	0	0	0	0	0	0	0	0	0	0	0	0	0	0	0	0	0	0	0	0	0	0	0	0	0	0	0	0	0
China_rumen1906	0	0	0	2	0	0	1	2	0	0	0	0	1	0	0	0	0	0	0	0	0	0	0	0	0	0	0	0	0	0	0	0	0	0	0	0	0	0	0	0	0	0	0	0	0	0	0	0	0
China_rumen1907	0	0	0	0	0	1	0	0	0	0	1	0	0	0	0	0	0	0	0	0	0	0	0	0	0	0	0	0	0	0	0	0	0	0	0	0	0	0	0	0	1	0	0	0	0	0	0	0	0
China_rumen1908	0	0	0	1	0	0	0	0	0	0	1	0	0	0	0	0	0	0	0	0	0	0	0	0	0	0	0	0	0	0	0	0	0	0	0	0	0	0	0	0	1	0	0	0	0	0	0	0	0
China_rumen191	0	0	0	0	0	0	0	1	1	0	0	0	0	0	0	0	0	0	0	0	0	0	0	0	0	0	0	0	0	0	0	0	0	0	0	0	0	0	0	0	0	0	0	0	0	0	0	0	0
China_rumen1910	0	0	0	0	1	1	0	1	1	1	1	0	0	0	0	0	0	0	0	0	0	0	0	0	0	0	1	0	0	0	0	0	0	0	0	0	1	0	0	0	1	0	0	0	0	0	0	0	1
China_rumen1911	0	0	0	0	0	2	0	0	1	0	0	0	0	0	0	0	0	0	0	0	0	0	0	0	0	0	0	0	1	1	1	2	2	0	0	0	0	0	0	0	0	0	0	2	0	0	1	0	0
China_rumen1912	0	1	0	0	0	0	0	0	0	1	0	0	0	0	0	0	1	0	0	0	0	0	0	0	0	0	0	0	0	0	0	0	0	0	0	0	1	0	0	0	1	0	0	0	0	0	0	0	0
China_rumen1913	0	0	0	0	0	0	0	0	0	0	1	0	0	0	0	0	0	0	0	0	0	0	0	0	0	0	0	0	0	0	0	0	0	0	0	0	0	0	0	0	1	0	0	0	0	0	0	0	0
China_rumen1914	0	0	0	0	0	1	0	0	0	0	1	0	1	0	0	0	0	0	0	0	0	0	0	0	0	0	0	0	0	0	0	0	0	0	0	0	0	0	0	0	1	0	0	0	0	0	0	0	0
China_rumen1915	0	0	1	0	0	1	1	1	1	0	0	0	0	0	0	0	0	0	0	0	0	0	0	0	0	0	0	0	0	0	0	0	0	0	0	0	0	0	0	0	0	0	0	0	0	0	0	0	0
China_rumen1916	0	1	0	0	0	1	0	1	0	0	0	0	1	0	0	0	1	0	0	0	0	0	0	0	0	0	0	0	0	0	0	0	0	0	0	0	0	0	0	0	0	0	0	0	0	0	0	0	0
China_rumen1919	0	0	0	0	0	1	0	1	2	0	0	0	0	0	0	0	0	0	0	0	0	0	0	0	0	0	0	0	0	0	0	0	0	0	0	0	0	0	0	0	0	0	0	0	0	0	0	0	0
China_rumen192	0	0	0	0	0	1	0	1	0	0	0	0	0	1	0	0	0	0	0	0	0	0	0	0	0	0	0	0	0	0	0	0	0	0	0	0	0	0	0	0	2	0	0	0	1	1	0	0	0
China_rumen1920	0	0	0	0	1	0	0	1	0	1	0	0	0	1	0	0	0	0	0	0	0	0	0	0	0	0	1	0	0	0	0	0	0	0	0	0	0	0	0	0	0	0	0	0	0	0	0	0	0
China_rumen1921	0	0	0	1	0	0	0	0	0	0	0	0	0	0	0	0	0	0	0	0	0	0	0	0	0	0	0	0	0	0	0	0	0	0	0	0	0	0	0	0	2	0	0	0	0	0	0	0	0
China_rumen1922	0	0	0	0	0	2	0	1	1	0	0	0	0	0	0	0	0	0	0	0	0	0	0	0	0	0	0	0	0	0	0	0	0	0	0	0	0	0	0	0	0	0	0	0	0	0	0	0	0
China_rumen1923	1	1	0	1	0	1	1	2	0	0	0	0	1	0	0	0	1	0	0	0	0	0	0	0	0	1	0	0	0	0	0	0	0	0	0	0	0	0	0	0	0	0	0	0	0	0	0	0	0
China_rumen1924	0	0	0	0	1	0	0	1	0	2	1	0	0	0	0	0	0	0	0	0	0	0	0	0	0	0	0	0	0	0	0	0	0	0	0	0	1	0	0	0	1	0	0	0	0	0	0	0	0
China_rumen1925	0	0	0	0	0	2	0	0	1	0	0	0	0	0	0	0	0	0	0	0	0	0	0	0	0	0	0	0	0	0	0	0	0	0	0	0	0	0	0	0	0	0	0	0	0	0	0	0	0
China_rumen1926	0	0	0	0	0	0	1	1	0	0	0	0	0	0	0	0	0	0	0	0	0	0	0	0	0	0	0	0	0	0	0	0	0	0	0	0	0	0	0	0	0	0	0	0	0	0	0	0	0
China_rumen1927	0	0	0	1	0	0	0	0	0	0	2	0	0	0	0	0	0	0	0	0	0	0	0	0	0	0	0	0	0	0	0	0	0	0	0	0	0	0	0	0	2	0	0	0	0	0	0	0	0
China_rumen1928	0	0	0	0	0	1	0	0	0	0	0	0	0	0	0	0	0	0	0	0	0	0	0	0	0	0	0	0	0	0	0	0	0	0	0	0	0	0	0	0	0	0	0	0	0	0	0	0	0
China_rumen1929	0	0	0	0	0	1	0	1	0	0	1	0	0	0	0	0	0	0	0	0	0	0	0	0	0	0	0	0	0	0	0	0	0	0	0	0	0	0	0	0	1	0	0	0	0	0	0	0	0
China_rumen193	0	0	0	0	1	2	1	1	1	0	0	0	0	0	0	0	0	0	0	0	0	0	0	0	0	0	0	0	0	0	0	0	0	0	0	0	0	0	0	0	0	0	0	0	0	0	0	0	0
China_rumen1930	1	1	0	0	1	1	0	1	1	0	1	0	1	0	0	0	0	0	0	0	0	0	0	0	0	0	0	0	0	0	0	0	0	0	0	0	0	0	0	0	1	0	0	0	0	0	0	0	0
China_rumen1931	0	0	1	0	0	0	0	1	0	1	0	0	0	0	0	0	0	0	0	0	0	0	0	0	0	0	0	0	0	0	0	0	0	0	0	0	0	0	0	0	0	0	0	0	0	0	0	0	1
China_rumen1932	1	0	0	0	1	0	0	0	0	1	0	0	0	0	0	0	0	0	0	0	0	0	0	0	0	0	0	0	0	0	0	0	0	0	0	0	0	0	0	0	0	0	0	0	0	0	0	0	0
China_rumen1933	0	0	0	0	0	2	1	1	2	0	0	0	0	0	0	0	0	0	0	0	0	0	0	0	0	0	0	0	0	0	0	0	0	0	0	0	0	0	0	0	0	0	0	0	0	0	0	0	0
China_rumen1934	1	1	0	0	0	0	0	2	0	0	0	0	0	0	0	0	0	0	0	0	0	0	0	0	0	2	0	0	0	0	0	0	0	0	0	0	0	0	0	0	0	0	0	0	0	0	0	0	0
China_rumen1935	0	0	0	0	0	1	0	1	0	1	1	0	0	0	0	0	0	0	0	0	0	0	0	0	0	0	0	0	0	0	0	0	0	0	0	0	2	0	0	0	1	0	0	0	0	0	0	0	0
China_rumen1936	2	1	1	0	0	0	0	0	0	1	0	0	0	0	0	0	0	0	0	0	0	0	0	0	0	0	0	0	0	0	0	0	0	0	0	0	0	0	0	0	0	0	0	0	0	0	0	0	0
China_rumen1937	0	0	1	0	0	1	0	0	0	0	0	0	1	0	0	0	1	0	0	0	0	0	0	0	0	0	0	0	0	0	0	0	0	0	0	0	0	0	0	0	0	0	0	0	0	0	0	0	0
China_rumen1938	1	1	0	0	0	1	1	2	0	0	0	0	1	0	0	0	1	0	0	0	0	0	0	0	0	0	0	0	0	0	0	0	0	0	0	0	0	0	0	0	0	0	0	0	0	0	1	0	0
China_rumen1939	0	0	0	2	0	0	0	0	0	0	0	0	0	0	0	0	0	0	0	0	0	0	0	0	0	0	0	0	0	0	0	0	0	0	0	0	0	0	0	0	0	0	0	0	0	0	0	0	0
China_rumen1940	0	0	0	0	2	2	0	0	0	0	2	0	0	0	0	0	0	0	0	0	0	0	0	0	0	0	0	0	0	0	0	0	0	0	0	0	1	0	0	0	0	0	0	0	0	0	0	0	2
China_rumen1941	0	0	0	1	0	1	1	2	0	0	0	0	1	0	1	0	0	0	0	0	0	0	0	0	0	0	0	0	0	0	0	0	0	0	0	0	0	0	0	0	0	0	0	0	0	0	1	0	0
China_rumen1942	0	0	0	0	0	1	0	1	0	0	0	0	0	0	0	0	0	0	0	0	0	0	0	0	0	0	0	0	0	0	0	0	0	0	0	0	0	0	0	0	0	0	0	0	0	0	0	0	0
China_rumen1943	0	0	0	0	0	1	0	1	1	0	0	0	0	0	0	0	0	0	0	0	0	0	0	0	0	0	0	0	0	0	0	0	0	0	0	0	0	0	0	0	0	0	0	0	0	0	0	0	0
China_rumen1944	1	1	0	0	0	1	0	2	0	0	0	0	1	0	0	0	0	0	0	0	0	0	0	0	0	1	0	0	0	0	0	0	0	0	0	0	0	0	0	0	0	0	0	0	0	0	0	0	0
China_rumen1945	0	0	0	0	0	2	1	2	0	0	0	0	0	0	0	0	0	0	0	0	0	0	0	0	0	0	0	0	0	0	0	0	0	0	0	0	0	0	0	0	0	0	0	0	0	0	0	0	0
China_rumen1946	2	0	0	0	1	1	0	0	0	1	0	0	0	0	0	0	0	0	0	0	0	0	0	0	0	0	0	0	0	0	0	0	0	0	0	0	0	0	0	0	0	0	0	0	0	0	0	0	0
China_rumen1947	0	0	0	0	0	2	1	1	0	0	0	0	0	0	0	0	0	0	0	0	0	0	0	0	0	0	0	0	0	0	0	0	0	0	0	0	0	0	0	0	0	0	0	0	0	0	0	0	0
China_rumen1949	0	0	0	0	0	0	1	0	0	0	0	0	0	0	0	0	0	0	0	0	0	0	0	0	0	1	0	0	0	0	0	0	0	0	0	0	0	0	0	0	0	0	0	0	0	0	0	0	0
China_rumen195	0	0	0	0	0	0	0	1	0	0	0	0	0	0	0	0	0	0	0	0	0	0	0	0	0	0	0	0	0	0	0	0	0	0	0	0	0	0	0	0	0	0	0	0	0	0	0	0	0
China_rumen1950	0	0	0	0	0	1	0	1	0	0	0	0	0	0	0	0	0	0	0	0	0	0	0	0	0	0	0	0	0	0	0	0	0	0	0	0	0	0	0	0	0	0	0	0	0	0	0	0	0
China_rumen1951	0	0	0	1	0	1	1	1	0	0	0	0	1	0	0	0	0	0	0	0	0	0	0	0	0	0	0	0	0	0	0	0	0	0	0	0	0	0	0	0	0	0	0	0	0	0	0	0	0
China_rumen1952	0	0	0	0	1	1	0	1	0	1	1	0	0	0	0	0	0	0	0	0	0	0	0	0	0	0	0	0	0	0	0	0	0	0	0	0	1	0	0	0	1	0	0	0	0	0	0	0	0
China_rumen1953	2	1	0	0	1	1	0	0	0	2	0	0	0	0	0	0	0	0	0	0	0	0	0	0	0	0	0	0	0	0	0	0	0	0	0	0	0	0	0	0	0	0	0	0	0	0	0	0	0
China_rumen1954	0	0	0	1	0	1	0	1	0	0	1	0	0	0	0	0	0	0	0	0	0	0	0	0	0	0	0	0	0	0	0	0	0	0	0	0	0	0	0	0	1	0	0	0	0	0	0	0	0
China_rumen1955	0	0	0	0	0	1	0	2	0	0	1	0	0	0	0	0	0	0	0	0	0	0	0	0	0	0	0	0	0	0	0	0	0	0	0	0	0	0	0	0	1	0	0	0	0	0	0	0	0
China_rumen1956	0	0	0	0	0	1	0	1	0	0	0	0	0	0	1	0	0	0	0	0	0	0	0	1	0	0	0	0	0	0	0	0	0	0	1	0	0	0	0	0	0	0	0	0	0	0	0	0	0
China_rumen1957	0	0	0	0	0	2	0	1	1	0	0	0	0	0	0	0	0	0	0	0	0	0	0	0	0	0	0	0	0	0	0	0	0	0	0	0	0	0	0	0	0	0	0	0	0	0	0	0	0
China_rumen1958	0	0	0	0	0	1	0	1	0	0	1	0	2	0	0	0	0	0	0	0	0	0	0	0	0	0	0	0	0	0	0	0	0	0	0	0	0	0	0	0	1	0	0	0	0	0	0	0	0
China_rumen1959	0	0	0	0	0	0	0	0	0	0	1	0	1	0	1	0	0	0	0	0	0	0	0	0	0	0	0	1	0	0	0	0	0	0	0	0	0	0	0	0	1	0	0	0	0	0	0	0	0
China_rumen1960	1	1	0	0	0	0	1	2	0	0	0	0	1	0	0	0	0	1	0	0	0	0	0	0	0	0	0	0	0	0	0	0	0	0	0	0	0	0	0	0	1	0	0	0	0	0	0	0	0
China_rumen1961	0	0	0	0	0	2	1	0	0	0	0	0	0	0	0	0	0	0	0	0	0	0	0	0	0	0	0	0	0	0	0	0	0	0	0	0	0	0	0	0	0	0	0	0	0	0	0	0	0
China_rumen1962	0	0	0	1	0	1	1	2	0	0	1	0	1	0	0	0	0	0	0	0	0	0	0	0	0	0	0	0	0	0	0	0	0	0	0	0	0	0	0	0	1	0	0	0	0	0	1	0	0
China_rumen1963	0	0	0	0	0	1	0	0	0	0	0	0	0	0	0	0	0	0	0	0	0	0	0	0	0	0	0	0	0	0	0	0	0	0	0	0	0	0	0	0	0	0	0	0	0	0	0	0	0
China_rumen1964	0	0	0	0	0	0	0	1	0	0	0	0	0	0	0	0	0	0	0	0	0	0	0	0	0	0	0	0	0	0	0	0	0	0	0	0	0	0	0	0	1	0	0	0	0	0	0	0	0
China_rumen1965	1	1	0	0	0	1	1	2	0	0	0	0	1	0	1	0	1	0	0	0	0	0	0	0	0	0	0	0	0	0	0	0	0	0	0	0	0	0	0	0	0	0	0	0	0	0	0	0	0
China_rumen1966	0	1	0	0	0	0	0	0	0	0	0	0	1	0	1	0	0	1	0	0	0	0	0	0	0	0	0	0	0	0	0	0	0	0	0	0	0	0	0	0	0	0	0	0	0	0	0	0	0
China_rumen1968	0	0	0	1	0	0	0	0	0	0	0	0	0	0	0	0	0	0	0	0	0	0	0	0	0	0	0	0	0	0	0	0	0	0	0	0	0	0	0	0	0	0	0	0	0	0	0	0	0
China_rumen1969	0	1	0	0	0	0	0	2	0	0	1	0	1	0	0	0	1	0	0	0	0	0	0	0	0	1	0	0	0	0	0	0	0	0	0	0	0	0	0	0	1	0	0	0	0	0	0	0	0
China_rumen197	0	0	0	0	0	0	0	1	0	0	1	0	1	0	0	0	0	0	0	0	0	0	0	0	0	0	0	0	0	0	0	0	0	0	0	0	0	0	0	0	1	0	0	0	0	0	0	0	0
China_rumen1970	0	0	0	0	0	2	1	1	0	0	0	0	0	0	0	0	0	0	0	0	0	0	0	0	0	0	0	0	0	0	0	0	0	0	0	0	0	0	0	0	0	0	0	0	0	0	0	0	0
China_rumen1971	0	0	0	1	0	2	0	0	0	0	0	0	0	0	0	0	1	0	0	0	0	0	0	0	0	0	0	0	0	0	0	0	0	0	0	0	0	0	0	0	0	0	0	0	0	0	0	0	0
China_rumen1972	0	1	0	0	0	1	1	2	0	0	0	0	0	0	0	0	1	0	0	0	0	0	0	0	0	1	0	0	0	0	0	0	0	0	0	0	0	0	0	0	0	0	0	0	0	0	1	0	0
China_rumen1973	0	0	0	0	0	1	0	0	0	0	1	0	0	0	1	0	0	0	0	0	0	0	0	0	0	0	0	0	0	0	0	0	0	0	0	0	0	0	0	0	1	0	0	0	0	0	0	0	0
China_rumen1974	0	0	0	0	0	0	1	2	0	0	0	0	0	0	0	0	1	0	0	0	0	0	0	0	0	0	0	0	0	0	0	0	0	0	0	0	0	0	0	0	0	0	0	0	0	0	0	0	0
China_rumen1975	0	0	0	0	0	1	0	0	0	0	0	0	1	0	0	0	0	0	0	0	0	0	0	0	0	0	0	0	0	0	0	0	0	0	0	0	0	0	0	0	0	0	0	0	0	0	0	0	0
China_rumen1977	0	0	0	0	1	1	1	1	0	0	0	0	0	0	0	0	0	0	0	0	0	0	0	0	0	0	0	0	0	0	0	0	0	0	0	0	0	0	0	0	0	0	0	0	0	0	0	0	0
China_rumen1978	0	0	0	0	0	1	0	0	0	0	0	0	0	0	0	0	0	0	0	0	0	0	0	0	0	0	0	0	0	0	0	0	0	0	0	0	0	0	0	0	0	0	0	0	0	0	0	0	0
China_rumen1979	1	1	0	0	0	1	0	1	0	0	0	0	1	0	0	0	0	0	0	0	0	0	0	0	0	1	0	0	0	0	0	0	0	0	0	0	0	0	0	0	0	0	0	0	0	0	0	0	0
China_rumen1980	0	0	0	0	0	2	1	1	1	0	0	0	0	0	0	0	0	0	0	0	0	0	0	0	0	0	0	0	0	0	0	0	0	0	0	0	0	0	0	0	0	0	0	0	0	0	0	0	0
China_rumen1981	0	0	1	1	0	1	1	1	0	0	0	0	0	0	0	0	0	0	0	0	0	0	0	0	0	0	0	0	0	0	0	0	0	0	0	0	0	0	0	0	0	0	0	0	0	0	0	0	0
China_rumen1983	0	0	0	0	0	1	0	1	0	0	1	0	1	0	0	0	0	0	0	0	0	0	0	0	0	0	0	0	0	0	0	0	0	0	0	0	0	0	0	0	1	0	0	0	0	0	0	0	0
China_rumen1984	0	0	0	0	0	1	0	0	1	0	0	0	0	0	0	0	0	0	0	0	0	0	0	0	0	0	0	0	1	0	0	1	1	0	0	0	0	0	0	0	0	1	0	0	0	0	0	0	0
China_rumen1985	0	0	0	1	0	0	1	2	0	0	0	0	1	0	0	0	1	0	0	0	0	0	0	0	0	2	0	0	0	0	0	0	0	0	0	0	0	0	0	0	0	0	0	0	0	0	0	0	0
China_rumen1986	0	1	0	0	0	1	0	0	1	0	1	0	0	0	0	0	0	0	0	0	0	0	0	0	0	0	0	0	0	0	0	0	0	0	0	0	0	0	0	0	1	0	0	0	0	0	0	0	0
China_rumen1987	0	0	0	0	0	1	0	2	0	0	2	0	0	0	0	0	0	0	0	0	0	0	0	0	0	0	0	0	0	0	0	0	0	0	0	0	0	0	0	0	1	0	0	0	0	0	0	0	0
China_rumen1988	0	0	0	1	0	0	1	2	0	0	0	0	1	0	0	0	0	0	0	0	0	0	0	0	0	0	0	0	0	0	0	0	0	0	0	0	0	0	0	0	0	0	0	0	0	0	0	0	0
China_rumen1989	2	1	0	0	0	3	0	2	0	0	1	0	1	0	0	0	0	0	0	0	0	0	0	0	0	0	0	0	0	0	0	0	0	0	0	0	0	0	0	0	1	0	0	0	0	0	0	0	0
China_rumen199	0	0	0	3	0	0	0	2	0	0	0	0	1	0	0	0	0	0	0	0	0	0	0	0	0	0	0	0	0	0	0	0	0	0	0	0	0	0	0	0	0	0	0	0	0	0	1	0	0
China_rumen1990	0	1	0	0	0	1	1	2	0	0	0	0	0	0	0	0	0	0	0	0	0	0	0	0	0	1	0	0	0	0	0	0	0	0	0	0	0	0	0	0	0	0	0	0	0	0	0	0	0
China_rumen1991	1	0	0	0	0	1	1	2	0	0	0	0	1	0	0	0	1	0	0	0	0	0	0	0	0	0	0	0	0	0	0	0	0	0	0	0	0	0	0	0	0	0	0	0	0	0	0	0	0
China_rumen1992	0	0	0	0	0	0	0	0	3	0	0	0	0	0	0	0	0	0	0	0	0	0	0	0	0	0	0	0	1	0	0	1	0	0	0	0	0	0	0	0	0	1	1	0	0	0	0	0	0
China_rumen1993	0	0	0	0	0	0	0	0	0	0	0	0	0	0	0	0	0	0	0	0	0	0	0	0	0	0	0	0	0	0	0	0	0	0	0	0	0	0	0	0	0	0	0	0	0	0	0	0	0
China_rumen1994	0	0	0	0	0	0	0	0	0	0	0	0	1	0	0	1	0	0	0	0	0	0	0	0	0	0	0	0	0	0	0	0	0	0	0	0	0	0	0	0	1	0	0	0	0	0	0	0	0
China_rumen1995	0	0	0	0	1	0	0	0	0	0	0	0	0	0	0	0	0	0	0	0	0	0	0	0	0	0	0	0	0	0	0	0	0	0	0	0	0	0	0	0	1	0	0	0	0	0	0	0	0
China_rumen1996	0	0	0	0	1	1	1	2	1	0	0	0	0	0	0	0	0	0	0	0	0	0	0	0	0	0	0	0	0	0	0	0	0	0	0	0	0	0	0	0	0	0	0	0	0	0	0	0	0
China_rumen1997	0	0	0	1	0	0	0	0	0	0	0	0	0	0	0	0	0	0	0	0	0	0	0	0	0	0	0	0	0	0	0	0	0	0	0	0	0	0	0	0	0	0	0	0	0	0	0	0	0
China_rumen1998	0	0	0	1	0	0	0	1	0	0	0	0	0	0	0	0	0	0	0	0	0	0	0	0	0	0	0	0	0	0	0	0	0	0	0	0	0	0	0	0	0	0	0	0	0	0	0	0	0
China_rumen1999	0	0	0	0	0	1	0	1	0	1	0	0	0	0	0	0	0	0	0	0	0	0	0	0	0	0	0	0	0	0	0	0	0	0	0	0	0	0	0	0	0	0	0	0	0	0	0	0	0
China_rumen2	0	0	0	0	0	1	0	0	0	0	1	0	0	0	0	0	0	0	0	0	0	0	0	0	0	0	0	0	0	0	0	0	0	0	0	0	0	0	0	0	2	0	0	0	0	0	0	0	0
China_rumen20	0	1	0	0	0	1	0	0	0	0	0	0	0	0	0	0	0	0	0	0	0	0	0	0	0	0	0	0	0	0	0	0	0	0	0	0	0	0	0	0	1	0	0	0	0	0	0	0	0
China_rumen200	0	0	0	0	0	1	0	1	0	0	1	0	0	0	0	0	0	0	0	0	0	0	0	0	0	0	0	0	0	0	0	0	0	0	0	0	0	0	0	0	1	0	0	0	0	0	0	0	0
China_rumen2000	0	0	0	0	0	2	1	2	0	0	0	0	0	0	0	0	0	0	0	0	0	0	0	0	0	0	0	0	0	0	0	0	0	0	0	0	0	0	0	0	0	0	0	0	0	0	0	0	0
China_rumen2001	0	0	0	0	0	1	0	1	0	0	0	0	0	0	0	0	0	0	0	0	0	0	0	0	0	0	0	0	0	0	0	0	0	0	0	0	0	0	0	0	0	0	0	0	0	0	0	0	0
China_rumen2002	0	0	0	1	0	1	1	0	0	0	1	0	1	0	0	0	1	0	0	0	0	0	0	0	0	0	0	0	0	0	0	0	0	0	0	0	0	0	0	0	2	0	0	0	0	0	0	0	0
China_rumen2003	0	0	0	0	0	0	0	0	3	0	0	0	0	0	0	0	0	0	0	0	0	0	0	0	0	0	0	0	0	1	1	1	1	0	0	0	0	0	0	0	0	1	2	2	0	0	1	0	0
China_rumen2004	0	0	0	1	0	0	0	0	0	0	1	0	0	0	0	0	0	0	0	0	0	0	0	0	0	0	0	0	0	0	0	0	0	0	0	0	0	0	0	0	1	0	0	0	0	0	0	0	0
China_rumen2005	0	0	0	0	0	1	0	0	0	0	0	0	0	0	0	0	0	0	0	0	0	0	0	0	0	0	0	0	0	0	0	0	0	0	0	0	0	0	0	0	1	0	0	0	1	1	0	0	0
China_rumen2006	0	0	0	0	0	1	0	0	1	1	0	0	0	0	0	0	0	0	0	0	0	0	0	0	0	0	0	0	0	0	0	0	0	0	0	0	0	0	0	0	0	0	0	0	0	0	0	0	0
China_rumen2007	0	0	0	0	0	0	0	0	0	0	0	0	0	0	0	0	0	0	0	0	0	0	0	0	0	0	0	0	0	0	0	0	0	0	0	0	0	0	0	0	0	0	0	0	0	0	0	0	0
China_rumen2008	0	0	0	0	0	1	0	0	1	0	0	0	0	0	0	0	0	0	0	0	0	0	0	0	0	0	0	0	0	0	0	0	0	0	0	0	0	0	0	0	0	0	0	0	0	0	0	0	0
China_rumen2009	0	0	1	1	0	1	0	2	0	0	0	0	0	0	0	0	0	0	0	0	0	0	0	0	0	0	0	0	0	0	0	0	0	0	0	0	0	0	0	0	0	0	0	0	0	0	0	0	0
China_rumen2010	0	0	0	0	1	1	0	2	5	0	1	0	1	0	0	0	0	0	0	0	0	0	0	0	0	0	0	0	0	0	0	0	0	0	0	0	0	0	0	0	1	0	0	0	0	0	0	0	0
China_rumen2011	0	0	0	1	0	0	0	0	0	0	1	0	1	0	0	0	0	0	0	0	0	0	0	0	0	0	0	0	0	0	0	0	0	0	0	0	0	0	0	0	2	0	0	0	0	0	0	0	0
China_rumen2012	0	0	0	0	0	0	0	0	0	0	0	0	0	0	0	0	0	0	0	0	0	0	0	0	0	0	0	0	0	0	0	0	0	0	0	0	0	0	0	0	0	0	0	0	0	0	0	0	0
China_rumen2013	0	0	0	0	0	0	0	1	0	0	0	0	0	0	0	0	0	0	0	0	0	0	0	0	0	0	0	0	0	0	0	0	0	0	0	0	0	0	0	0	0	0	0	0	0	0	0	0	0
China_rumen2014	0	0	0	0	0	1	1	1	0	0	0	0	0	0	0	0	0	0	0	0	0	0	0	0	0	0	0	0	0	0	0	0	0	0	0	0	0	0	0	0	0	0	0	0	0	0	0	0	0
China_rumen2015	1	1	0	0	0	0	0	1	1	0	1	0	0	0	0	0	0	0	0	0	0	0	0	0	0	0	0	0	0	0	0	0	0	0	0	0	0	0	0	0	1	0	0	0	0	0	0	0	0
China_rumen2016	0	0	0	1	0	0	0	0	0	0	0	0	0	0	0	0	0	0	0	0	0	0	0	0	0	0	0	0	0	0	0	0	0	0	0	0	0	0	0	0	0	0	0	0	0	0	0	0	0
China_rumen2017	0	0	0	0	1	1	0	0	0	0	0	0	0	0	0	0	0	0	0	0	0	0	0	0	0	0	0	0	0	0	0	0	0	0	0	0	0	0	0	0	0	0	0	0	0	0	0	0	0
China_rumen2018	0	0	0	0	0	0	0	0	0	0	0	0	0	0	0	0	0	0	0	0	0	0	0	0	0	0	0	0	0	0	1	0	0	0	0	0	0	0	0	0	0	0	0	4	0	0	0	0	0
China_rumen2019	0	0	0	0	0	0	0	1	0	0	0	0	0	0	0	0	0	0	0	0	0	0	0	0	0	0	0	0	0	0	0	0	0	0	0	0	0	0	0	0	0	0	0	0	0	0	0	0	0
China_rumen202	0	0	0	0	0	0	0	2	0	0	0	0	0	0	0	1	0	0	0	0	0	0	0	0	0	0	0	0	0	0	0	0	0	0	0	0	0	0	0	0	1	0	0	0	0	0	0	0	0
China_rumen2020	0	0	0	0	0	0	0	1	2	0	0	0	0	0	0	0	0	0	0	0	0	0	0	0	0	0	0	0	0	0	0	0	0	0	0	0	0	0	0	0	0	0	0	0	0	0	0	0	0
China_rumen2021	0	0	0	0	0	1	0	0	1	0	0	0	0	0	0	0	0	0	0	0	0	0	0	0	0	0	0	0	0	0	0	0	0	0	0	0	0	0	0	0	0	0	0	0	0	0	0	0	0
China_rumen2022	0	0	0	0	0	0	0	1	0	0	1	0	0	0	0	0	0	0	0	0	0	0	0	0	0	0	0	0	0	0	0	0	0	0	0	0	0	0	0	0	1	0	0	0	0	0	0	0	0
China_rumen2023	0	0	0	0	0	1	1	1	0	0	1	0	0	0	0	0	0	0	0	0	0	0	0	0	0	0	0	0	0	0	0	0	0	0	0	0	0	0	0	0	1	0	0	0	0	0	0	0	0
China_rumen2024	0	0	0	0	0	1	0	1	0	0	1	0	0	0	0	0	0	0	0	0	0	0	0	0	0	0	0	0	0	0	0	0	0	0	0	0	0	0	0	0	1	0	0	0	0	0	0	0	0
China_rumen2025	0	0	0	0	1	1	1	1	1	0	0	0	0	0	0	0	0	0	0	0	0	0	0	0	0	0	0	0	0	0	0	0	0	0	0	0	0	0	0	0	0	0	0	0	0	0	0	0	0
China_rumen2027	1	1	0	0	0	0	0	1	0	0	0	0	0	0	0	0	0	0	0	0	0	0	0	0	0	0	0	0	0	0	0	0	0	0	0	0	0	0	0	0	0	0	0	0	0	0	0	0	0
China_rumen2028	0	0	0	0	1	1	0	1	0	1	0	0	0	0	0	0	0	0	0	0	0	0	0	0	0	0	0	0	0	0	0	0	0	0	0	0	0	0	0	0	0	0	0	0	0	0	0	0	0
China_rumen2029	0	0	0	0	0	0	0	1	0	0	0	0	0	0	0	0	0	0	0	0	0	0	0	0	0	0	0	0	0	0	0	0	0	0	0	0	0	0	0	0	1	0	0	0	0	0	0	0	0
China_rumen2030	0	0	0	1	0	0	0	0	0	0	0	0	0	0	0	0	0	0	0	0	0	0	0	0	0	0	0	0	0	0	0	0	0	0	0	0	0	0	0	0	0	0	0	0	0	0	0	0	0
China_rumen2031	0	0	0	0	0	0	0	2	0	0	1	0	0	0	0	0	0	0	0	0	0	0	0	0	0	0	0	0	0	0	0	0	0	0	0	0	0	0	0	0	0	0	0	0	0	0	0	0	0
China_rumen2032	0	0	0	0	0	1	0	1	0	0	1	0	0	0	0	0	0	0	0	0	0	0	0	0	0	0	0	0	0	0	0	0	0	0	0	0	0	0	0	0	1	0	0	0	0	0	0	0	0
China_rumen2033	1	0	0	0	0	0	0	1	0	0	0	0	0	0	0	0	0	0	0	0	0	0	0	0	0	0	0	0	0	0	0	0	0	0	0	0	0	0	0	0	0	0	0	0	0	0	0	0	0
China_rumen2034	0	0	0	0	0	0	0	0	0	0	0	0	0	1	0	0	0	0	0	0	0	0	0	0	0	0	0	0	0	0	0	0	0	0	0	0	0	0	0	0	0	0	0	0	0	0	0	0	0
China_rumen2035	0	0	0	0	0	2	0	1	1	0	0	0	0	0	0	0	0	0	0	0	0	0	0	0	0	0	0	0	0	0	0	0	0	0	0	0	0	0	0	0	0	0	0	0	0	0	0	0	0
China_rumen2036	0	0	0	0	0	1	1	1	0	0	1	0	0	0	0	0	0	0	0	0	0	0	0	0	0	0	0	0	0	0	0	0	0	0	0	0	0	0	0	0	1	0	0	0	0	0	0	0	0
China_rumen2037	0	0	0	0	0	0	0	0	0	0	0	0	1	0	0	0	0	1	0	0	0	0	0	0	0	0	0	0	0	0	0	0	0	0	0	0	0	0	0	0	0	0	0	0	0	0	0	0	0
China_rumen2038	0	0	0	1	0	0	0	0	0	0	0	0	0	0	0	0	0	0	0	0	0	0	0	0	0	0	0	0	0	0	0	0	0	0	0	0	0	0	0	0	0	0	0	0	0	0	0	0	0
China_rumen2039	0	0	0	0	0	0	0	1	0	0	1	0	0	0	0	0	0	0	0	0	0	0	0	0	0	0	0	0	0	0	0	0	0	0	0	0	0	0	0	0	0	0	0	0	0	0	0	0	0
China_rumen204	0	0	0	0	0	0	0	0	0	0	1	0	0	0	0	0	0	0	0	0	0	0	0	0	0	0	0	0	0	0	0	0	0	0	0	0	0	0	0	0	2	0	0	0	0	0	0	0	0
China_rumen2040	0	0	0	0	0	1	2	1	0	0	0	0	0	0	0	0	0	0	0	0	0	0	0	0	0	0	0	0	0	0	0	0	0	0	0	0	0	0	0	0	0	0	0	0	0	0	0	0	0
China_rumen2041	1	1	0	0	0	1	0	1	0	1	0	0	0	0	0	1	0	0	0	0	0	0	0	0	0	0	0	0	0	0	0	0	0	0	0	0	0	0	0	0	0	0	0	0	0	0	0	0	0
China_rumen2042	0	0	0	0	0	1	0	1	1	0	0	0	0	0	0	0	0	0	0	0	0	0	0	0	0	0	0	0	0	0	0	0	0	0	0	0	0	0	0	0	0	0	0	0	0	0	0	0	0
China_rumen2043	0	0	0	1	0	0	0	0	0	0	0	0	0	0	0	0	0	0	0	0	0	0	0	0	0	0	0	0	0	0	0	0	0	0	0	0	0	0	0	0	0	0	0	0	0	0	0	0	0
China_rumen2044	0	0	0	1	0	0	0	0	0	0	0	0	0	0	0	0	0	0	0	0	0	0	0	0	0	0	0	0	0	0	0	0	0	0	0	0	0	0	0	0	0	0	0	0	0	0	0	0	0
China_rumen2045	0	0	0	0	0	1	1	1	0	0	1	0	0	0	0	0	0	0	0	0	0	0	0	0	0	0	0	0	0	0	0	0	0	0	0	0	0	0	0	0	1	0	0	0	0	0	0	0	0
China_rumen2046	0	0	0	0	0	2	0	0	1	0	0	0	0	0	0	0	0	0	0	0	0	0	0	0	0	0	0	0	0	0	0	0	0	0	0	0	0	0	0	0	0	0	0	0	0	0	0	0	0
China_rumen2047	0	0	0	0	0	1	0	1	1	0	0	0	0	0	0	0	0	0	0	0	0	0	0	0	0	0	0	0	0	0	0	0	0	0	0	0	0	0	0	0	0	0	0	0	0	0	0	0	0
China_rumen2048	0	0	0	0	0	0	0	0	1	1	0	0	0	0	0	0	0	0	0	0	0	0	0	0	0	0	0	0	0	0	0	0	0	0	0	0	0	0	0	0	0	0	0	0	0	0	0	0	0
China_rumen2049	0	0	0	0	0	1	0	1	0	0	1	0	0	0	0	0	0	0	0	0	0	0	0	0	0	0	0	0	0	0	0	0	0	0	0	0	0	0	0	0	1	0	0	0	0	0	0	0	0
China_rumen205	0	0	0	0	0	1	0	0	0	0	1	0	0	0	0	0	0	0	0	0	0	0	0	0	0	0	0	0	0	0	0	0	0	0	0	0	0	0	0	0	1	0	0	0	0	0	0	0	0
China_rumen2050	0	0	0	1	0	1	0	0	0	0	1	0	0	0	0	1	0	0	0	0	0	0	0	0	0	0	0	0	0	0	0	0	0	0	0	0	0	0	0	0	2	0	0	0	0	0	0	0	0
China_rumen2051	0	0	0	0	0	2	0	1	1	0	0	0	0	0	0	0	0	0	0	0	0	0	0	0	0	0	0	0	0	0	0	0	0	0	0	0	0	0	0	0	0	0	0	0	0	0	0	0	0
China_rumen2052	0	0	0	1	0	0	0	1	0	0	1	0	0	0	0	0	0	0	0	0	0	0	0	0	0	0	0	0	0	0	0	0	0	0	0	0	0	0	0	0	1	0	0	0	0	0	0	0	0
China_rumen2053	0	0	0	0	0	1	0	1	0	0	0	0	0	0	0	0	0	0	0	0	0	0	0	0	0	0	0	0	0	0	0	0	0	0	0	0	0	0	0	0	0	0	0	0	0	0	0	0	0
China_rumen2054	1	0	0	0	0	1	0	2	0	0	1	0	0	0	0	0	0	0	0	0	0	0	0	0	0	0	0	0	0	0	0	0	0	0	0	0	0	0	0	0	1	0	0	0	0	0	0	0	0
China_rumen2055	0	0	0	1	0	0	0	0	0	0	1	0	0	0	0	0	0	0	0	0	0	0	0	0	0	0	0	0	0	0	0	0	0	0	0	0	0	0	0	0	1	0	0	0	0	0	0	0	0
China_rumen2056	0	0	0	0	1	0	0	0	1	0	0	0	1	0	1	0	0	0	0	0	0	0	0	0	0	0	0	0	0	0	0	0	0	0	0	0	0	0	0	0	2	0	0	0	0	0	0	0	0
China_rumen2057	0	0	0	0	0	0	0	1	0	0	0	0	0	0	0	0	0	0	0	0	0	0	0	0	0	0	0	0	0	0	0	0	0	0	0	0	0	0	0	0	1	0	0	0	0	0	0	0	0
China_rumen2058	0	1	0	0	0	0	0	1	0	0	0	0	0	0	0	0	0	0	0	0	0	0	0	0	0	0	0	0	0	0	0	0	0	0	0	0	0	0	0	0	0	0	0	0	0	0	0	0	0
China_rumen2059	0	0	0	0	1	1	0	1	1	0	0	0	0	0	0	0	0	0	0	0	0	0	0	0	0	0	0	0	0	0	0	0	0	0	0	0	0	0	0	0	0	0	0	0	0	0	0	0	0
China_rumen206	0	0	0	0	0	0	0	0	0	0	0	0	1	0	0	0	0	0	0	0	0	0	0	0	0	0	0	0	0	0	0	0	0	0	0	0	0	0	0	0	1	0	0	0	0	0	0	0	0
China_rumen2060	0	0	0	0	0	0	0	1	0	0	0	0	0	0	0	0	0	0	0	0	0	0	0	0	0	0	0	0	0	0	0	0	0	0	0	0	0	0	0	0	2	0	0	0	0	0	0	0	0
China_rumen2061	0	0	0	0	0	0	0	2	0	0	0	0	1	0	0	0	0	0	0	0	0	0	0	0	0	0	0	0	0	0	0	0	0	0	0	0	0	0	0	0	0	0	0	0	0	0	0	0	0
China_rumen2062	0	0	0	0	0	0	0	0	0	0	1	0	0	0	0	0	0	0	0	0	0	0	0	0	0	0	0	0	0	0	0	0	0	0	0	0	0	0	0	0	0	0	0	0	0	0	0	0	0
China_rumen2063	0	0	0	0	1	1	0	1	1	0	0	0	0	0	0	0	0	0	0	0	0	0	0	0	0	0	0	0	0	0	0	0	0	0	0	0	0	0	0	0	0	0	0	0	0	0	0	0	0
China_rumen2064	0	0	0	1	0	0	0	1	0	0	0	0	0	0	0	0	0	0	0	0	0	0	0	0	0	0	0	0	0	0	0	0	0	0	0	0	0	0	0	0	1	0	0	0	0	0	0	0	0
China_rumen2065	0	0	0	1	0	2	0	0	0	0	0	0	0	0	0	0	1	0	0	0	0	0	0	0	0	0	0	0	0	0	0	0	0	0	0	0	0	0	0	0	1	0	0	0	0	0	1	0	0
China_rumen2066	0	0	0	0	0	0	0	1	0	0	0	0	0	0	0	0	0	0	0	0	0	0	0	0	0	0	0	0	0	0	0	0	0	0	0	0	0	0	0	0	2	0	0	0	0	0	0	0	0
China_rumen2067	1	0	0	0	0	1	0	1	0	0	0	0	1	0	0	0	1	0	0	0	0	0	0	0	0	0	0	0	0	0	0	0	0	0	0	0	0	0	0	0	0	0	0	0	0	0	0	0	0
China_rumen2068	0	0	0	1	0	1	1	2	0	0	0	0	0	0	0	0	0	0	0	0	0	0	0	0	0	1	0	0	0	0	0	0	0	0	0	0	0	0	0	0	0	0	0	0	1	1	0	0	0
China_rumen2069	0	0	0	0	0	1	1	1	0	0	1	0	0	0	0	0	0	0	0	0	0	0	0	0	0	0	0	0	0	0	0	0	0	0	0	0	0	0	0	0	1	0	0	0	0	0	0	0	0
China_rumen207	0	0	0	1	0	0	0	0	0	0	0	0	0	0	0	0	1	0	0	0	0	0	0	0	0	0	0	0	0	0	0	0	0	0	0	0	0	0	0	0	0	0	0	0	0	0	0	0	0
China_rumen2070	0	0	0	0	0	0	0	1	0	0	1	0	0	0	0	0	1	0	0	0	0	0	0	0	0	0	0	0	0	0	0	0	0	0	0	0	0	0	0	0	0	0	0	0	0	0	0	0	0
China_rumen2071	0	0	0	0	0	1	0	1	0	0	1	0	0	0	0	0	0	0	0	0	0	0	0	0	0	0	0	0	0	0	0	0	0	0	0	0	0	0	0	0	2	0	0	0	0	0	0	0	0
China_rumen2072	0	0	0	0	0	1	0	0	1	0	0	0	0	0	0	0	0	0	0	0	0	0	0	0	0	0	0	0	0	0	0	0	0	0	0	0	0	0	0	0	1	0	0	0	0	0	0	0	0
China_rumen2073	0	0	0	0	0	2	0	0	1	0	0	0	0	0	0	0	0	0	0	0	0	0	0	0	0	0	0	0	0	0	0	0	0	0	0	0	0	0	0	0	0	0	0	0	0	0	0	0	0
China_rumen2075	0	0	0	1	0	1	0	1	0	0	2	0	0	0	0	0	1	0	0	0	0	0	0	0	0	0	0	0	0	0	0	0	0	0	0	0	0	0	0	0	1	0	0	0	0	0	0	0	0
China_rumen2076	0	0	0	0	0	0	1	2	0	0	0	0	1	0	0	0	2	0	0	0	0	0	0	0	0	0	0	0	0	0	0	0	0	0	0	0	0	0	0	0	0	0	0	0	0	0	0	0	0
China_rumen2077	0	0	0	0	0	0	0	1	0	0	0	0	0	0	0	1	0	0	0	0	0	0	0	0	0	0	0	0	0	0	0	0	0	0	0	0	0	0	0	0	1	0	0	0	0	0	0	0	0
China_rumen2078	0	0	1	0	0	1	1	2	0	0	0	0	0	0	0	0	0	0	0	0	0	0	0	0	0	0	0	0	0	0	0	0	0	0	0	0	0	0	0	0	0	0	0	0	0	0	0	0	0
China_rumen2079	0	0	1	0	0	1	1	2	0	0	1	0	0	0	0	0	0	0	0	0	0	0	0	0	0	0	0	0	0	0	0	0	0	0	0	0	0	0	0	0	1	0	0	0	0	0	0	0	0
China_rumen208	0	0	0	0	0	0	0	0	0	0	0	0	0	0	0	0	0	0	0	0	0	0	0	0	0	0	0	0	0	0	0	0	0	0	0	0	0	0	0	0	1	0	0	0	0	0	0	0	0
China_rumen2080	0	0	0	0	0	0	1	1	0	0	0	0	0	0	0	0	0	0	0	0	0	0	0	0	0	0	0	0	0	0	0	0	0	0	0	0	0	0	0	0	0	0	0	0	0	0	0	0	0
China_rumen2081	0	0	0	0	0	0	0	1	1	0	1	0	0	0	0	0	0	0	0	0	0	0	0	0	0	0	0	0	0	0	0	0	0	0	0	0	0	0	0	0	2	0	0	0	0	0	0	0	0
China_rumen2082	1	0	0	0	0	0	0	1	0	0	1	0	0	0	0	0	0	0	0	0	0	0	0	0	0	0	0	0	0	0	0	0	0	0	0	0	0	0	0	0	0	0	0	0	0	0	0	0	0
China_rumen2083	0	0	0	0	0	2	0	0	0	0	0	0	0	0	0	0	0	0	0	0	0	0	0	0	0	0	0	0	0	0	0	0	0	0	0	0	0	0	0	0	1	0	0	0	0	0	0	0	0
China_rumen2084	1	1	0	0	1	1	0	1	0	0	0	0	0	0	0	0	0	0	0	0	0	0	0	0	0	0	0	0	0	0	0	0	0	0	0	0	0	0	0	0	0	0	0	0	0	0	0	0	0
China_rumen2085	0	0	0	0	0	0	1	2	0	0	0	0	1	0	0	0	0	0	0	0	0	0	0	0	0	0	0	0	0	0	0	0	0	0	0	0	0	0	0	0	0	0	0	0	0	0	0	0	0
China_rumen2086	0	0	0	0	0	0	0	1	1	0	1	0	0	0	0	0	0	0	0	0	0	0	0	0	0	0	0	0	0	0	0	0	0	0	0	0	0	0	0	0	1	0	0	0	0	0	0	0	0
China_rumen2087	0	0	0	0	0	0	0	0	0	0	0	0	0	0	0	0	0	0	0	0	0	0	0	0	0	0	0	0	0	0	0	0	0	0	0	0	0	0	0	0	0	0	0	0	0	0	0	0	0
China_rumen2088	0	0	0	0	0	1	0	1	0	0	1	0	0	0	0	0	0	0	0	0	0	0	0	0	0	0	0	0	0	0	0	0	0	0	0	0	0	0	0	0	1	0	0	0	0	0	0	0	0
China_rumen2089	0	0	0	0	0	0	0	1	1	0	0	0	0	0	0	0	0	0	0	0	0	0	0	0	0	0	0	0	0	0	0	0	0	0	0	0	0	0	0	0	0	0	0	0	0	0	0	0	0
China_rumen209	1	1	0	0	0	0	0	1	0	0	2	0	0	0	0	0	0	0	0	0	0	0	0	0	0	0	0	0	0	0	0	0	0	0	0	0	0	0	0	0	2	0	0	0	0	0	0	0	0
China_rumen2090	0	0	0	0	0	0	0	1	1	0	0	0	0	0	0	0	0	0	0	0	0	0	0	0	0	0	0	0	0	0	0	0	0	0	0	0	0	0	0	0	0	0	0	0	0	0	0	0	0
China_rumen2091	1	0	0	0	0	1	0	1	1	0	1	0	0	0	0	0	0	0	0	0	0	0	0	0	0	0	0	0	0	0	0	0	0	0	0	0	0	0	0	0	1	0	0	0	0	0	0	0	0
China_rumen2092	0	0	0	0	0	1	1	1	1	0	0	0	0	0	0	0	0	0	0	0	0	0	0	0	0	0	0	0	0	0	0	0	0	0	0	0	0	0	0	0	0	0	0	0	0	0	0	0	0
China_rumen2093	1	0	0	0	0	1	0	1	0	0	2	0	0	0	0	0	0	0	0	0	0	0	0	0	0	0	0	0	0	0	0	0	0	0	0	0	0	0	0	0	2	0	0	0	0	0	0	0	0
China_rumen2094	0	0	0	0	0	0	0	0	0	0	1	0	0	0	0	0	0	0	0	0	0	0	0	0	0	0	0	0	0	0	0	0	0	0	0	0	0	0	0	0	0	0	0	0	0	0	0	0	0
China_rumen2095	0	0	0	0	0	1	0	1	0	0	1	0	0	0	0	0	0	0	0	0	0	0	0	0	0	0	0	0	0	0	0	0	0	0	0	0	0	0	0	0	2	0	0	0	0	0	0	0	0
China_rumen2096	1	0	0	0	0	1	0	1	1	0	1	0	0	0	0	0	0	0	0	0	0	0	0	0	0	0	0	0	0	0	0	0	0	0	0	0	0	0	0	0	0	0	0	0	0	0	0	0	0
China_rumen2097	0	0	0	0	0	1	0	1	0	0	1	0	0	0	0	1	0	0	0	0	0	0	0	0	0	0	0	0	0	0	0	0	0	0	0	0	0	0	0	0	0	0	0	0	0	0	0	0	0
China_rumen2098	0	0	0	0	0	1	1	1	0	0	0	0	0	0	0	0	0	0	0	0	0	0	0	0	0	0	0	0	0	0	0	0	0	0	0	0	0	0	0	0	1	0	0	0	0	0	0	0	0
China_rumen2099	0	0	0	0	0	0	0	0	0	0	1	0	0	0	0	0	0	0	0	0	0	0	0	0	0	0	0	0	0	0	0	0	0	0	0	0	0	0	0	0	1	0	0	0	0	0	0	0	0
China_rumen210	0	0	0	0	0	1	0	0	0	0	0	0	0	0	0	0	0	0	0	0	0	0	0	0	0	0	0	0	0	0	0	0	0	0	0	0	0	0	0	0	2	0	0	0	1	1	0	2	0
China_rumen2100	0	1	0	0	0	1	0	1	1	0	0	0	0	0	0	0	0	0	0	0	0	0	0	0	0	0	0	0	0	0	0	0	0	0	0	0	0	0	0	0	1	0	0	0	0	0	0	0	0
China_rumen2101	0	0	0	0	0	1	0	0	0	0	0	0	0	0	0	0	0	0	0	0	0	0	0	0	0	0	0	0	0	0	0	0	0	0	0	0	0	0	0	0	0	0	0	0	0	0	0	0	0
China_rumen2102	0	0	0	0	0	1	1	1	1	0	0	0	0	0	0	0	0	0	0	0	0	0	0	0	0	0	0	0	0	0	0	0	0	0	0	0	0	0	0	0	0	0	0	0	0	0	0	0	0
China_rumen2103	0	0	0	0	0	2	0	1	0	0	0	0	0	0	0	0	0	0	0	0	0	0	0	0	0	0	0	0	0	0	0	0	0	0	0	0	0	0	0	0	0	0	0	0	0	0	0	0	0
China_rumen2104	0	0	0	0	0	2	1	2	2	0	0	0	0	0	0	0	0	0	0	0	0	0	0	0	0	0	0	0	0	0	0	0	0	0	0	0	0	0	0	0	0	0	0	0	0	0	0	0	0
China_rumen2105	1	1	0	0	0	0	0	1	1	0	1	0	0	0	0	0	0	0	0	0	0	0	0	0	0	0	0	0	0	0	0	0	0	0	0	0	0	0	0	0	0	0	0	0	0	0	0	0	0
China_rumen2106	1	1	0	0	1	1	0	1	1	0	1	0	1	0	0	0	0	0	0	0	0	0	0	0	0	0	0	0	0	0	0	0	0	0	0	0	0	0	0	0	1	0	0	0	0	0	0	0	0
China_rumen2107	0	0	1	0	0	1	0	2	0	0	0	0	0	0	0	0	0	0	0	0	0	0	0	0	0	0	0	0	0	0	0	0	0	0	0	0	0	0	0	0	0	0	0	0	0	0	0	0	0
China_rumen2108	0	0	0	1	0	0	0	0	0	0	0	0	0	0	0	0	0	0	0	0	0	0	0	0	0	0	0	0	0	0	0	0	0	0	0	0	0	0	0	0	0	0	0	0	0	0	0	0	0
China_rumen2109	0	0	0	0	0	0	0	2	1	0	0	0	0	0	0	0	0	0	0	0	0	0	0	0	0	0	0	0	0	0	0	0	0	0	0	0	0	0	0	0	0	0	0	0	0	0	0	0	0
China_rumen211	0	0	0	0	0	0	0	1	0	0	0	0	0	0	0	0	0	0	0	0	0	0	0	0	0	0	0	0	0	0	0	0	0	0	0	0	0	0	0	0	1	0	0	0	0	0	0	0	0
China_rumen2110	0	0	0	0	0	1	0	1	0	0	1	0	0	0	0	0	0	0	0	0	0	0	0	0	0	0	0	0	0	0	0	0	0	0	0	0	0	0	0	0	1	0	0	0	0	0	0	0	0
China_rumen2111	0	0	0	1	0	0	0	0	0	0	0	0	0	0	0	0	0	0	0	0	0	0	0	0	0	0	0	0	0	0	0	0	0	0	0	0	0	0	0	0	0	0	0	0	0	0	0	0	0
China_rumen2112	0	0	0	0	0	2	0	4	1	0	0	0	0	0	0	0	0	0	0	0	0	0	0	0	0	0	0	0	0	0	0	0	0	0	0	0	0	0	0	0	0	0	0	0	0	0	0	0	0
China_rumen2113	1	1	0	0	0	0	0	1	0	0	1	0	0	0	0	0	0	0	0	0	0	0	0	0	0	0	0	0	0	0	0	0	0	0	0	0	0	0	0	0	1	0	0	0	0	0	0	0	0
China_rumen2114	0	0	0	0	0	1	0	1	1	0	0	0	0	0	0	0	0	0	0	0	0	0	0	0	0	0	0	0	0	0	0	0	0	0	0	0	0	0	0	0	0	0	0	0	0	0	0	0	0
China_rumen2115	0	0	0	0	1	2	1	1	1	0	0	0	0	0	0	0	0	0	0	0	0	0	0	0	0	0	0	0	0	0	0	0	0	0	0	0	0	0	0	0	0	0	0	0	0	0	0	0	0
China_rumen2116	0	0	0	0	0	0	0	1	0	0	1	0	0	0	0	1	0	0	0	0	0	0	0	0	0	0	0	0	0	0	0	0	0	0	0	0	0	0	0	0	0	0	0	0	0	0	0	0	0
China_rumen2117	0	0	0	0	1	1	1	1	0	1	0	0	0	0	0	0	0	0	0	0	0	0	0	0	0	0	0	0	0	0	0	0	0	0	0	0	0	0	0	0	0	0	0	0	0	0	0	0	0
China_rumen2118	0	0	0	0	0	2	1	1	0	1	0	0	0	0	0	0	0	0	0	0	0	0	0	0	0	0	0	0	0	0	0	0	0	0	0	0	0	0	0	0	0	0	0	0	0	0	0	0	0
China_rumen2119	0	0	0	0	0	1	0	1	1	0	0	0	0	0	0	0	0	0	0	0	0	0	0	0	0	0	0	0	0	0	0	0	0	0	0	0	0	0	0	0	0	0	0	0	0	0	0	0	0
China_rumen212	0	0	0	3	0	2	0	1	0	0	2	0	1	0	0	0	0	0	0	0	0	0	0	0	0	0	0	0	0	0	0	0	0	0	0	0	0	0	0	0	2	0	0	0	0	0	0	0	0
China_rumen2120	0	0	0	1	0	1	1	2	0	0	1	0	0	0	0	0	0	0	0	0	0	0	0	0	0	0	0	0	0	0	0	0	0	0	0	0	0	0	0	0	1	0	0	0	0	0	0	0	0
China_rumen2121	0	0	0	1	0	0	0	1	0	0	0	0	0	0	0	0	0	0	0	0	0	0	0	0	0	0	0	0	0	0	0	0	0	0	0	0	0	0	0	0	1	0	0	0	0	0	0	0	0
China_rumen2122	0	0	0	1	0	0	0	0	0	0	0	0	0	0	0	0	0	0	0	0	0	0	0	0	0	0	0	0	0	0	0	0	0	0	0	0	0	0	0	0	0	0	0	0	0	0	0	0	0
China_rumen2123	0	0	0	0	0	1	1	1	1	0	0	0	0	0	0	0	0	0	0	0	0	0	0	0	0	0	0	0	0	0	0	0	0	0	0	0	0	0	0	0	0	0	0	0	0	0	0	0	0
China_rumen2124	0	0	0	0	0	1	0	0	1	0	0	0	0	0	0	0	0	0	0	0	0	0	0	0	0	0	0	0	0	0	0	0	0	0	0	0	0	0	0	0	0	0	0	0	0	0	0	0	0
China_rumen2125	0	0	0	0	0	0	0	0	1	0	0	0	0	0	0	0	0	0	0	0	0	0	0	0	0	0	0	0	0	0	0	0	0	0	0	0	0	0	0	0	0	0	0	0	0	0	0	0	0
China_rumen2126	0	0	0	0	0	0	0	1	1	0	0	0	0	0	0	0	0	0	0	0	0	0	0	0	0	0	0	0	0	0	0	0	0	0	0	0	0	0	0	0	0	0	0	0	0	0	0	0	0
China_rumen2127	1	1	0	0	1	1	0	1	0	1	0	0	0	0	0	0	0	0	0	0	0	0	0	0	0	0	0	0	0	0	0	0	0	0	0	0	0	0	0	0	0	0	0	0	0	0	0	0	0
China_rumen2128	1	1	0	1	0	0	1	1	0	0	0	0	0	0	0	0	0	0	0	0	0	0	0	0	0	0	0	0	0	0	0	0	0	0	0	0	0	0	0	0	1	0	0	0	0	0	0	0	0
China_rumen2129	0	0	0	0	0	2	1	2	1	0	0	0	0	0	0	0	0	0	0	0	0	0	0	0	0	0	0	0	0	0	0	0	0	0	0	0	0	0	0	0	0	0	0	0	0	0	0	0	0
China_rumen213	0	0	0	0	0	2	0	1	0	0	0	0	0	0	0	0	0	0	0	0	0	0	0	0	0	0	0	0	0	0	0	0	0	0	0	0	0	0	0	0	0	0	0	0	0	0	0	0	0
China_rumen2130	0	0	0	0	0	0	0	1	1	0	0	0	0	0	0	0	0	0	0	0	0	0	0	0	0	2	0	0	0	1	0	1	0	0	0	0	0	0	0	0	0	1	1	2	0	0	0	0	0
China_rumen2131	0	0	0	1	0	1	0	0	0	0	1	0	0	0	0	0	0	0	0	0	0	0	0	0	0	0	0	0	0	0	0	0	0	0	0	0	0	0	0	0	1	0	0	0	0	0	0	0	0
China_rumen2132	0	0	0	0	0	1	0	1	0	0	1	0	0	0	0	0	0	0	0	0	0	0	0	0	0	0	0	0	0	0	0	0	0	0	0	0	0	0	0	0	1	0	0	0	1	1	0	0	0
China_rumen2133	0	0	0	1	0	0	0	0	0	0	0	0	0	0	0	0	0	0	0	0	0	0	0	0	0	0	0	0	0	0	0	0	0	0	0	0	0	0	0	0	1	0	0	0	0	0	0	0	0
China_rumen2134	0	0	0	0	0	1	0	0	0	0	1	0	0	0	0	0	0	0	0	0	0	0	0	0	0	0	0	0	0	0	0	0	0	0	0	0	0	0	0	0	2	0	0	0	0	0	0	0	0
China_rumen2135	0	0	0	1	0	0	0	1	0	0	1	0	0	0	0	0	0	0	0	0	0	0	0	0	0	0	0	0	0	0	0	0	0	0	0	0	0	0	0	0	1	0	0	0	0	0	0	0	0
China_rumen2136	1	1	0	0	0	1	0	1	0	0	0	0	0	0	0	0	1	0	0	0	0	0	0	0	0	0	0	0	0	0	0	0	0	0	0	0	0	0	0	0	0	0	0	0	0	0	0	0	0
China_rumen2137	0	0	0	1	0	0	0	1	0	0	0	0	0	0	0	0	0	0	0	0	0	0	0	0	0	0	0	0	0	0	0	0	0	0	0	0	0	0	0	0	1	0	0	0	0	0	0	0	0
China_rumen2138	0	0	1	1	0	1	0	0	0	0	0	0	1	0	0	0	1	0	0	0	0	0	0	0	0	0	0	0	0	0	0	0	0	0	0	0	0	0	0	0	0	0	0	0	0	0	0	0	0
China_rumen2139	0	0	0	0	0	1	1	1	1	0	0	0	0	0	0	0	0	0	0	0	0	0	0	0	0	0	0	0	0	0	0	0	0	0	0	0	0	0	0	0	0	0	0	0	0	0	0	0	0
China_rumen214	0	0	0	1	0	0	1	2	0	0	0	0	0	0	0	0	1	0	0	0	0	0	0	0	0	0	0	0	0	0	0	0	0	0	0	0	0	0	0	0	1	0	0	0	0	0	0	0	0
China_rumen2140	0	0	0	0	0	0	0	2	0	0	0	0	0	0	0	0	0	0	0	0	0	0	0	0	0	0	0	0	0	0	0	0	0	0	0	0	0	0	0	0	0	0	0	0	0	0	0	0	0
China_rumen2141	0	0	0	0	0	1	0	0	0	0	0	0	0	0	0	0	0	0	0	0	0	0	0	0	0	0	0	0	0	0	0	0	0	0	0	0	0	0	0	0	0	0	0	0	0	0	0	0	0
China_rumen2142	0	0	1	1	0	1	1	1	0	0	0	0	0	0	0	0	0	0	0	0	0	0	0	0	0	0	0	0	0	0	0	0	0	0	0	0	0	0	0	0	0	0	0	0	0	0	0	0	0
China_rumen2143	0	0	1	0	0	0	1	0	0	0	0	0	0	0	0	0	0	0	0	0	0	0	0	0	0	0	0	0	0	0	0	0	0	0	0	0	0	0	0	0	0	0	0	0	1	0	0	0	0
China_rumen2144	0	0	0	0	0	1	0	1	0	0	1	0	0	0	0	0	0	0	0	0	0	0	0	0	0	0	0	0	0	0	0	0	0	0	0	0	0	0	0	0	1	0	0	0	0	0	0	0	0
China_rumen2145	0	0	0	0	0	1	1	1	0	0	1	0	1	0	0	0	0	0	0	0	0	0	0	0	0	0	0	0	0	0	0	0	0	0	0	0	0	0	0	0	1	0	0	0	0	0	0	0	0
China_rumen2146	0	0	0	1	0	1	0	1	0	0	1	0	0	0	0	0	0	0	0	0	0	0	0	0	0	0	0	0	0	0	0	0	0	0	0	0	0	0	0	0	1	0	0	0	0	0	0	0	0
China_rumen2147	0	0	0	1	0	1	1	2	0	0	1	0	0	0	0	0	1	0	0	0	0	0	0	0	0	0	0	0	0	0	0	0	0	0	0	0	0	0	0	0	1	0	0	0	0	0	0	0	0
China_rumen2148	0	0	1	1	0	0	1	1	0	0	0	0	0	0	0	0	0	0	0	0	0	0	0	0	0	0	0	0	0	0	0	0	0	0	0	0	0	0	0	0	0	0	0	0	0	0	0	0	0
China_rumen2149	0	0	0	0	0	1	0	1	0	0	1	0	0	0	0	0	0	0	0	0	0	0	0	0	0	0	0	0	0	0	0	0	0	0	0	0	0	0	0	0	2	0	0	0	0	0	0	0	0
China_rumen215	0	0	0	0	0	2	1	0	0	0	0	0	0	0	0	0	0	0	0	0	0	0	0	0	0	0	0	0	0	0	0	0	0	0	0	0	0	0	0	0	0	0	0	0	0	0	0	0	0
China_rumen2150	0	0	0	0	0	1	0	0	1	0	1	0	0	0	0	0	0	0	0	0	0	0	0	0	0	0	0	0	0	0	0	0	0	0	0	0	0	0	0	0	1	0	0	0	0	0	0	0	0
China_rumen2151	0	0	0	0	0	0	0	1	0	0	1	0	0	0	0	0	0	0	0	0	0	0	0	0	0	0	0	0	0	0	0	0	0	0	0	0	0	0	0	0	1	0	0	0	0	0	0	0	0
China_rumen2152	0	0	0	0	0	0	0	0	0	0	0	0	0	0	0	0	0	0	0	0	0	0	0	0	0	0	0	0	0	0	0	0	0	0	0	0	0	0	0	0	0	0	0	0	0	0	0	0	0
China_rumen2154	0	0	0	0	0	1	0	0	0	0	0	0	0	0	0	0	0	0	0	0	0	0	0	0	0	0	0	0	0	0	0	0	0	0	0	0	0	0	0	0	0	0	0	0	0	0	0	0	0
China_rumen2156	0	0	0	0	1	2	1	2	1	0	0	0	0	0	0	0	0	0	0	0	0	0	0	0	0	0	0	0	0	0	0	0	0	0	0	0	0	0	0	0	0	0	0	0	0	0	0	0	0
China_rumen2157	0	0	0	0	0	1	0	1	0	0	1	0	0	0	0	0	0	0	0	0	0	0	0	0	0	0	0	0	0	0	0	0	0	0	0	0	0	0	0	0	1	0	0	0	0	0	0	0	0
China_rumen2158	1	1	0	0	0	1	0	1	0	0	1	0	0	0	0	0	0	0	0	0	0	0	0	0	0	0	0	0	0	0	0	0	0	0	0	0	0	0	0	0	1	0	0	0	0	0	1	0	0
China_rumen2159	0	0	0	0	0	1	1	2	0	0	0	0	0	0	0	0	0	0	0	0	0	0	0	0	0	0	0	0	0	0	0	0	0	0	0	0	0	0	0	0	0	0	0	0	0	0	0	0	0
China_rumen2160	0	0	0	0	0	0	0	1	0	0	1	0	0	0	0	0	0	0	0	0	0	0	0	0	0	0	0	0	0	0	0	0	0	0	0	0	0	0	0	0	1	0	0	0	0	0	0	0	0
China_rumen2161	0	0	0	0	0	1	0	1	0	0	1	0	0	0	0	0	0	0	0	0	0	0	0	0	0	0	0	0	0	0	0	0	0	0	0	0	0	0	0	0	1	0	0	0	0	0	0	0	0
China_rumen2162	1	1	0	0	0	0	0	1	0	0	0	0	0	0	0	0	0	0	0	0	0	0	0	0	0	0	0	0	0	0	0	0	0	0	0	0	0	0	0	0	0	0	0	0	0	0	0	0	0
China_rumen2163	0	0	0	1	0	0	0	0	0	0	1	0	0	0	0	0	0	0	0	0	0	0	0	0	0	0	0	0	0	0	0	0	0	0	0	0	0	0	0	0	1	0	0	0	0	0	0	0	0
China_rumen2164	0	0	0	0	0	1	0	1	1	0	0	0	0	0	0	0	0	0	0	0	0	0	0	0	0	0	0	0	0	0	0	0	0	0	0	0	0	0	0	0	0	0	0	0	0	0	0	0	0
China_rumen2165	0	0	0	1	0	1	0	2	0	0	0	0	0	0	0	0	0	0	0	0	0	0	0	0	0	0	0	0	0	0	0	0	0	0	0	0	0	0	0	0	1	0	0	0	0	0	0	0	0
China_rumen2166	0	0	1	1	0	1	0	2	0	0	1	0	0	0	0	0	0	0	0	0	0	0	0	0	0	0	0	0	0	0	0	0	0	0	0	0	0	0	0	0	1	0	0	0	0	0	0	0	0
China_rumen2167	0	1	0	0	0	0	0	0	0	0	1	0	0	0	0	0	0	0	0	0	0	0	0	0	0	0	0	0	0	0	0	0	0	0	0	0	0	0	0	0	1	0	0	0	0	0	0	0	0
China_rumen2168	0	0	0	0	0	2	0	1	1	0	0	0	0	0	0	0	0	0	0	0	0	0	0	0	0	0	0	0	0	0	0	0	0	0	0	0	0	0	0	0	1	0	0	0	0	0	0	0	0
China_rumen2169	0	0	0	0	0	2	1	0	0	1	0	0	0	0	0	0	0	0	0	0	0	0	0	0	0	0	0	0	0	0	0	0	0	0	0	0	0	0	0	0	0	0	0	0	0	0	0	0	0
China_rumen217	0	1	0	0	0	1	1	1	0	0	0	0	0	0	0	0	1	0	0	0	0	0	0	0	0	1	0	0	0	0	0	0	0	0	0	0	0	0	0	0	0	0	0	0	0	0	0	0	0
China_rumen2170	1	1	0	0	1	1	0	1	2	0	1	0	1	0	0	0	0	0	0	0	0	0	0	0	0	0	0	0	0	0	0	0	0	0	0	0	0	0	0	0	1	0	0	0	0	0	0	0	0
China_rumen2171	0	0	0	0	0	0	0	0	0	0	0	0	0	0	0	0	0	0	0	0	0	0	0	0	0	0	0	0	0	0	1	0	0	0	0	0	0	0	0	0	0	0	0	3	0	0	0	1	0
China_rumen2172	0	0	0	0	0	2	1	2	1	0	0	0	0	0	0	0	0	0	0	0	0	0	0	0	0	0	0	0	0	0	0	0	0	0	0	0	0	0	0	0	0	0	0	0	0	0	0	0	0
China_rumen2173	0	0	0	0	0	0	0	1	0	0	0	0	0	0	0	0	0	0	0	0	0	0	0	0	0	0	0	0	0	0	0	0	0	0	0	0	0	0	0	0	0	0	0	0	0	0	0	0	0
China_rumen2174	0	0	0	0	0	0	1	1	0	0	1	0	0	0	0	1	1	0	0	0	0	0	0	0	0	0	0	0	0	0	0	0	0	0	0	0	0	0	0	0	1	0	0	0	0	0	0	0	0
China_rumen2175	0	0	0	0	0	1	0	1	1	0	0	0	0	0	0	0	0	0	0	0	0	0	0	0	0	0	0	0	0	0	0	0	0	0	0	0	0	0	0	0	0	0	0	0	0	0	0	0	0
China_rumen2176	0	0	0	0	0	0	0	2	0	0	0	0	0	0	0	0	0	0	0	0	0	0	0	0	0	0	0	0	0	0	0	0	0	0	0	0	0	0	0	0	0	0	0	0	0	0	0	0	0
China_rumen2177	0	0	0	0	0	2	0	0	0	0	0	0	0	0	0	0	0	0	0	0	0	0	0	0	0	0	0	0	0	0	0	0	0	0	0	0	0	0	0	0	0	0	0	0	0	0	0	0	0
China_rumen2178	0	0	0	0	0	1	1	2	1	0	0	0	0	0	0	0	0	0	0	0	0	0	0	0	0	0	0	0	0	0	0	0	0	0	0	0	0	0	0	0	0	0	0	0	0	0	0	0	0
China_rumen2179	0	0	0	0	1	1	1	2	1	0	0	0	0	0	0	0	0	0	0	0	0	0	0	0	0	0	0	0	0	0	0	0	0	0	0	0	0	0	0	0	0	0	0	0	0	0	0	0	0
China_rumen2180	0	0	0	1	0	0	0	1	0	0	0	0	0	0	0	0	1	0	0	0	0	0	0	0	0	0	0	0	0	0	0	0	0	0	0	0	0	0	0	0	1	0	0	0	0	0	0	0	0
China_rumen2181	0	0	0	0	0	0	0	1	0	0	1	0	0	0	0	0	0	0	0	0	0	0	0	0	0	0	0	0	0	0	0	0	0	0	0	0	0	0	0	0	1	0	0	0	0	0	0	0	0
China_rumen2182	0	0	0	0	1	1	1	1	1	0	0	0	0	0	0	0	0	0	0	0	0	0	0	0	0	0	0	0	0	0	0	0	0	0	0	0	0	0	0	0	0	0	0	0	0	0	0	0	0
China_rumen2183	0	0	0	0	1	1	0	1	0	1	0	0	0	0	0	0	0	0	0	0	0	0	0	0	0	0	0	0	0	0	0	0	0	0	0	0	0	0	0	0	0	0	0	0	0	0	0	0	0
China_rumen2185	0	0	0	0	0	1	0	1	0	0	1	0	0	0	0	0	0	0	0	0	0	0	0	0	0	0	0	0	0	0	0	0	0	0	0	0	0	0	0	0	1	0	0	0	0	0	0	0	0
China_rumen2186	0	0	0	0	0	1	0	1	1	1	0	0	0	0	0	0	0	0	0	0	0	0	0	0	0	0	0	0	0	0	0	0	0	0	0	0	0	0	0	0	0	0	0	0	0	0	0	0	0
China_rumen2187	0	0	0	2	0	0	0	1	0	0	1	0	0	0	0	0	2	0	0	0	0	0	0	0	0	0	0	0	0	0	0	0	0	0	0	0	0	0	0	0	1	0	0	0	0	0	0	0	0
China_rumen2188	0	0	0	1	0	0	0	0	0	0	1	0	0	0	0	0	0	0	0	0	0	0	0	0	0	0	0	0	0	0	0	0	0	0	0	0	0	0	0	0	1	0	0	0	0	0	0	0	0
China_rumen2189	0	0	0	0	0	1	1	0	0	0	0	0	0	0	0	0	0	0	0	0	0	0	0	0	0	0	0	0	0	0	0	0	0	0	0	0	0	0	0	0	0	0	0	0	0	0	0	0	0
China_rumen219	0	0	0	0	1	1	0	0	1	0	0	0	0	0	0	0	0	0	0	0	0	0	0	0	0	0	0	0	0	0	0	0	0	0	0	0	0	0	0	0	0	0	0	0	0	0	0	0	0
China_rumen2190	0	0	0	1	0	0	0	1	0	0	1	0	0	0	0	0	0	0	0	0	0	0	0	0	0	0	0	0	0	0	0	0	0	0	0	0	0	0	0	0	1	0	0	0	0	0	0	0	0
China_rumen2191	0	0	1	1	0	0	0	1	0	0	0	0	0	0	0	0	0	0	0	0	0	0	0	0	0	0	0	0	0	0	0	0	0	0	0	0	0	0	0	0	0	0	0	0	0	0	0	0	0
China_rumen2192	0	0	0	0	0	0	0	1	0	0	0	0	0	0	0	0	0	0	0	0	0	0	0	0	0	0	0	0	0	0	0	0	0	0	0	0	0	0	0	0	2	0	0	0	0	0	0	0	0
China_rumen2193	0	0	0	0	0	0	0	1	1	0	0	0	0	0	0	0	0	0	0	0	0	0	0	0	0	0	0	0	0	0	0	0	0	0	0	0	0	0	0	0	0	0	0	0	0	0	0	0	0
China_rumen2194	0	0	1	0	1	0	1	1	0	1	0	0	0	0	0	0	0	0	0	0	0	0	0	0	0	0	0	0	0	0	0	0	0	0	0	0	0	0	0	0	0	0	0	0	0	0	0	0	0
China_rumen2195	0	0	0	0	0	0	0	0	0	0	1	0	0	0	0	0	0	0	0	0	0	0	0	0	0	0	0	0	0	0	0	0	0	0	0	0	0	0	0	0	1	0	0	0	0	0	0	0	0
China_rumen2196	0	0	0	0	0	1	0	1	1	0	0	0	0	0	0	0	0	0	0	0	0	0	0	0	0	0	0	0	0	0	0	0	0	0	0	0	0	0	0	0	0	0	0	0	0	0	0	0	0
China_rumen2197	0	0	0	0	0	2	1	1	1	0	0	0	0	0	0	0	0	0	0	0	0	0	0	0	0	0	0	0	0	0	0	0	0	0	0	0	0	0	0	0	0	0	0	0	0	0	0	0	0
China_rumen2198	0	0	0	0	0	2	0	1	1	0	0	0	0	0	0	0	0	0	0	0	0	0	0	0	0	0	0	0	0	0	0	0	0	0	0	0	0	0	0	0	0	0	0	0	0	0	0	0	0
China_rumen2199	0	0	0	0	0	1	1	0	0	0	1	0	0	0	0	0	0	0	0	0	0	0	0	0	0	0	0	0	0	0	0	0	0	0	0	0	0	0	0	0	1	0	0	0	0	0	0	0	0
China_rumen2200	0	0	0	0	0	2	1	0	1	0	1	0	0	0	0	0	0	0	0	0	0	0	0	0	0	0	0	0	0	0	0	0	0	0	0	0	0	0	0	0	1	0	0	0	0	0	0	0	0
China_rumen2201	0	0	0	0	0	2	0	2	1	0	0	0	0	0	0	0	0	0	0	0	0	0	0	0	0	0	0	0	0	0	0	0	0	0	0	0	0	0	0	0	0	0	0	0	0	0	0	0	0
China_rumen2202	1	0	0	1	0	1	1	1	0	0	0	0	0	0	0	0	0	0	0	0	0	0	0	0	0	1	0	0	0	0	0	0	0	0	0	0	0	0	0	0	0	0	0	0	1	1	0	0	0
China_rumen2203	0	0	0	0	0	0	0	0	0	0	0	0	0	0	0	0	0	0	0	0	0	0	0	0	0	0	0	0	0	0	0	0	0	0	0	0	0	0	0	0	0	0	0	0	0	0	0	0	0
China_rumen2204	0	0	1	1	0	1	1	1	0	0	0	0	0	0	0	0	1	0	0	0	0	0	0	0	0	0	0	0	0	0	0	0	0	0	0	0	0	0	0	0	0	0	0	0	0	0	0	0	0
China_rumen2205	0	0	0	0	0	0	0	1	0	0	0	0	0	0	0	0	0	0	0	0	0	0	0	0	0	0	0	0	0	0	0	0	0	0	0	0	0	0	0	0	0	0	0	0	0	0	0	0	0
China_rumen2206	0	0	0	1	0	2	1	1	1	0	0	0	0	0	0	0	0	0	0	0	0	0	0	0	0	0	0	0	0	0	0	0	0	0	0	0	0	0	0	0	0	0	0	0	0	0	0	0	0
China_rumen2207	0	0	0	1	0	1	0	1	0	0	1	0	0	0	0	0	0	0	0	0	0	0	0	0	1	0	0	0	0	0	0	0	0	0	0	0	0	0	0	0	1	0	0	0	0	0	0	0	0
China_rumen2208	1	1	0	0	0	1	0	1	0	1	1	0	0	0	0	0	0	0	0	0	0	0	0	0	0	0	0	0	0	0	0	0	0	0	0	0	0	0	0	0	1	0	0	0	0	0	0	0	0
China_rumen2209	0	0	0	0	1	1	1	1	1	0	0	0	0	0	0	0	0	0	0	0	0	0	0	0	0	0	0	0	0	0	0	0	0	0	0	0	0	0	0	0	0	0	0	0	0	0	0	0	0
China_rumen221	0	0	0	0	0	1	0	1	0	0	0	0	0	0	0	0	0	0	0	0	0	0	0	0	0	0	0	0	0	0	0	0	0	0	0	0	0	0	0	0	1	0	0	0	0	0	0	0	0
China_rumen2210	0	0	0	0	0	1	0	0	0	0	2	0	0	0	0	0	0	0	0	0	0	0	0	0	0	0	0	0	0	0	0	0	0	0	0	0	0	0	0	0	1	0	0	0	0	0	0	0	0
China_rumen2211	0	0	0	0	0	2	0	1	2	0	0	0	0	0	0	0	0	0	0	0	0	0	0	0	0	0	0	0	0	0	0	0	0	0	0	0	0	0	0	0	0	0	0	0	0	0	0	0	0
China_rumen2212	0	0	0	0	1	1	0	1	0	0	0	0	0	0	0	0	0	0	0	0	0	0	0	0	0	0	0	0	0	0	0	0	0	0	0	0	0	0	0	0	0	0	0	0	0	0	0	0	0
China_rumen2213	0	0	0	0	0	1	0	0	0	0	0	0	0	0	0	0	0	0	0	0	0	0	0	0	0	1	0	0	0	0	0	0	0	0	0	0	0	0	1	0	0	0	0	0	0	0	0	0	0
China_rumen2214	0	0	0	1	0	1	0	1	0	0	0	0	0	0	0	0	0	0	0	0	0	0	0	0	0	0	0	0	0	0	0	0	0	0	0	0	0	0	0	0	1	0	0	0	0	0	0	0	0
China_rumen2215	0	0	0	0	0	1	0	1	0	0	2	0	0	0	0	0	0	0	0	0	0	0	0	0	0	0	0	0	0	0	0	0	0	0	0	0	0	0	0	0	2	0	0	0	0	0	0	0	0
China_rumen2216	0	0	0	0	0	1	0	1	0	0	1	0	0	0	0	0	0	0	0	0	0	0	0	0	0	0	0	0	0	0	0	0	0	0	0	0	0	0	0	0	1	0	0	0	0	0	0	0	0
China_rumen2217	0	0	0	0	0	0	0	0	0	0	0	0	0	0	0	0	0	0	0	0	0	0	0	0	0	0	0	0	0	0	0	0	0	0	0	0	0	0	0	0	0	0	0	0	0	0	0	0	0
China_rumen2218	0	0	0	0	0	1	0	0	0	0	0	0	1	0	0	0	0	0	0	0	0	0	0	0	0	0	0	0	0	0	0	0	0	0	0	0	0	0	0	0	0	0	0	0	0	0	0	0	0
China_rumen2219	0	0	0	0	0	0	0	0	0	0	1	0	0	0	0	0	0	0	0	0	0	0	0	0	0	0	0	0	0	0	0	0	0	0	0	0	0	0	0	0	0	0	0	0	0	0	0	0	0
China_rumen2220	0	0	0	0	0	2	1	0	0	0	0	0	0	0	0	0	0	0	0	0	0	0	0	0	0	0	0	0	0	0	0	0	0	0	0	0	0	0	0	0	0	0	0	0	0	0	0	0	0
China_rumen2221	0	0	0	0	0	0	1	0	0	0	0	0	0	0	0	0	0	0	0	0	0	0	0	0	0	0	0	0	0	0	0	0	0	0	0	0	0	0	0	0	0	0	0	0	0	0	0	0	0
China_rumen2223	0	0	0	0	0	2	0	1	0	0	0	0	0	0	0	0	0	0	0	0	0	0	0	0	0	0	0	0	0	0	0	0	0	0	0	0	0	0	0	0	0	0	0	0	0	0	0	0	0
China_rumen2224	0	0	0	0	0	0	0	2	0	0	0	0	1	0	0	0	1	0	0	0	0	0	0	0	0	0	0	0	0	0	0	0	0	0	0	0	0	0	0	0	0	0	0	0	0	0	0	0	0
China_rumen2225	0	0	0	0	0	1	0	0	0	0	1	0	0	0	0	1	0	0	0	0	0	0	0	0	0	0	0	0	0	0	0	0	0	0	0	0	0	0	0	0	2	0	0	0	0	0	0	0	0
China_rumen2226	0	0	0	0	0	0	0	0	0	0	1	0	0	0	0	0	0	0	0	0	0	0	0	0	0	1	0	0	0	0	0	0	0	0	0	0	0	0	0	0	2	0	0	0	0	0	0	0	0
China_rumen2227	0	0	0	0	0	0	0	1	0	0	1	0	0	0	0	0	0	0	0	0	0	0	0	0	0	0	0	0	0	0	0	0	0	0	0	0	0	0	0	0	2	0	0	0	0	0	0	0	0
China_rumen2228	0	0	0	0	0	0	0	1	0	0	1	0	0	0	0	0	0	0	0	0	0	0	0	0	0	0	0	0	0	0	0	0	0	0	0	0	0	0	0	0	1	0	0	0	0	0	0	0	0
China_rumen2229	0	0	0	0	0	0	0	0	0	0	0	0	0	0	0	0	0	0	0	0	0	0	0	0	0	0	0	0	0	0	0	0	0	0	0	0	0	0	0	0	0	0	0	0	0	0	0	0	0
China_rumen223	0	0	0	0	0	1	0	0	0	0	0	0	0	0	0	0	0	0	0	0	0	0	0	0	0	0	0	0	0	0	0	0	0	0	0	0	0	0	0	0	0	0	0	0	0	0	0	0	0
China_rumen2230	0	0	0	0	0	1	0	1	0	0	0	0	0	1	0	0	0	0	0	0	0	0	0	0	0	0	0	0	0	0	0	0	0	0	0	0	0	0	0	0	1	0	0	0	0	0	0	0	0
China_rumen2231	0	0	0	0	0	0	0	0	0	0	0	0	0	0	0	0	0	0	0	0	0	0	0	0	0	0	0	0	0	0	0	0	0	0	0	0	0	0	0	0	0	0	0	0	0	0	0	0	0
China_rumen2232	0	0	0	0	0	0	0	0	0	0	0	0	2	0	0	0	1	0	0	0	0	0	0	0	0	0	0	0	0	0	0	0	0	0	0	0	0	0	0	0	0	0	0	0	0	0	0	0	0
China_rumen2233	0	0	0	0	0	0	0	1	0	0	0	0	0	0	0	0	0	0	0	0	0	0	0	0	0	1	0	0	0	0	0	0	0	0	0	0	0	0	0	0	1	0	0	0	0	0	0	0	0
China_rumen2234	0	0	0	0	0	3	0	1	0	0	0	0	0	0	0	0	0	0	0	0	0	0	0	0	0	0	0	0	0	0	0	0	0	0	0	0	0	0	0	0	0	0	0	0	0	0	0	0	0
China_rumen2236	0	0	0	0	0	0	0	1	0	0	0	0	0	0	0	0	0	0	0	0	0	0	0	0	0	0	0	0	0	0	0	0	0	0	0	0	0	0	0	0	0	0	0	0	0	0	0	0	0
China_rumen2237	0	0	0	0	0	1	0	0	0	0	0	0	0	0	0	0	0	0	0	0	0	0	0	0	0	0	0	0	0	0	0	0	0	0	0	0	0	0	0	0	1	0	0	0	0	0	0	0	0
China_rumen2238	1	1	0	1	0	0	0	1	0	0	0	0	0	0	0	0	0	0	0	0	0	0	0	0	0	1	0	0	0	0	0	0	0	0	0	0	0	0	0	0	0	0	0	0	0	0	0	0	0
China_rumen2239	0	0	0	0	0	1	0	0	0	0	0	0	0	0	0	0	0	0	0	0	0	0	0	0	0	0	0	0	0	0	0	0	0	0	0	0	0	0	0	0	1	0	0	0	0	0	0	0	0
China_rumen224	0	0	0	0	0	0	0	0	0	0	1	0	0	0	0	0	0	0	0	0	0	0	0	0	0	0	0	0	0	0	0	0	0	0	0	0	0	0	0	0	1	0	0	0	0	0	0	0	0
China_rumen2240	0	0	0	0	0	1	0	0	0	0	2	0	0	0	0	0	0	0	0	0	0	0	0	0	0	0	0	0	0	0	0	0	0	0	0	0	0	0	0	0	2	0	0	0	0	0	0	0	0
China_rumen2241	0	0	0	0	0	2	0	1	0	0	0	0	1	0	0	0	1	1	0	0	0	0	0	0	0	0	0	0	0	0	0	0	0	0	0	0	0	0	0	0	0	0	0	0	0	0	0	0	0
China_rumen2242	0	0	0	0	0	0	0	1	0	0	1	0	0	0	0	0	1	0	0	0	0	0	0	0	0	0	0	0	0	0	0	0	0	0	0	0	0	0	0	0	2	0	0	0	0	0	0	0	0
China_rumen2243	0	0	0	0	0	0	0	1	0	0	0	0	1	0	0	0	0	0	0	0	0	0	0	0	0	0	0	0	0	0	0	0	0	0	0	0	0	0	0	0	0	0	0	0	0	0	0	0	0
China_rumen2245	0	0	0	0	0	0	0	1	1	0	0	0	0	0	0	0	0	0	0	0	0	0	0	0	0	0	0	0	0	0	0	0	0	0	0	0	0	0	0	0	0	0	0	0	0	0	0	0	0
China_rumen2246	0	0	0	0	0	1	0	1	0	0	0	0	0	0	0	0	0	0	0	0	0	0	0	0	0	0	0	0	0	0	0	0	0	0	0	0	0	0	0	0	2	0	0	0	0	0	0	0	0
China_rumen2247	0	0	0	0	0	2	0	0	1	0	0	0	0	0	0	0	0	0	0	0	0	0	0	0	0	0	0	0	0	0	0	0	0	0	0	0	0	0	0	0	0	0	0	0	0	0	0	0	0
China_rumen2248	0	0	0	1	0	1	1	2	0	0	0	0	0	0	0	0	0	0	0	0	0	0	0	0	0	0	0	0	0	0	0	0	0	0	0	0	0	0	0	0	1	0	0	0	0	0	0	0	0
China_rumen2249	0	0	0	0	0	1	0	0	0	0	1	0	0	0	0	0	0	0	0	0	0	0	0	0	0	0	0	0	0	0	0	0	0	0	0	0	0	0	0	0	1	0	0	0	0	0	0	0	0
China_rumen225	0	1	0	0	0	0	0	1	0	0	0	0	1	0	0	0	0	0	0	0	0	0	0	0	0	0	0	0	0	0	0	0	0	0	0	0	0	0	0	0	0	0	0	0	0	0	0	0	0
China_rumen2250	0	0	0	0	0	1	0	0	0	0	2	0	1	0	0	0	0	0	0	0	0	0	0	0	0	0	0	0	0	0	0	0	0	0	0	0	0	0	0	0	3	0	0	0	0	0	0	0	0
China_rumen2251	0	0	1	1	0	0	0	0	0	0	0	0	1	0	0	0	1	0	0	0	0	0	0	0	0	0	0	0	0	0	0	0	0	0	0	0	0	0	0	0	0	0	0	0	0	0	0	0	0
China_rumen2252	0	0	0	0	0	1	0	1	0	0	1	0	0	0	0	0	0	0	0	0	0	0	0	0	0	0	0	0	0	0	0	0	0	0	0	0	0	0	0	0	2	0	0	0	1	1	0	2	0
China_rumen2253	0	1	0	0	0	0	1	0	0	0	0	0	0	0	0	0	1	0	0	0	0	0	0	0	0	0	0	0	0	0	0	0	0	0	0	0	0	0	0	0	0	0	0	0	0	0	0	0	0
China_rumen2254	0	0	0	0	0	0	0	0	0	0	0	0	0	0	0	0	0	0	0	0	0	0	0	0	0	0	0	0	0	0	0	0	0	0	0	0	0	0	0	0	0	0	0	0	0	0	0	0	0
China_rumen2255	0	0	0	0	0	0	0	0	0	0	0	0	0	0	0	1	1	0	0	0	0	0	0	0	0	0	0	0	0	0	0	0	0	0	0	0	0	0	0	0	1	0	0	0	0	0	0	0	0
China_rumen2256	0	0	1	0	1	0	1	1	1	1	0	0	0	0	0	0	0	0	0	0	0	0	0	0	0	0	0	0	0	0	0	0	0	0	0	0	0	0	0	0	0	0	0	0	0	0	0	0	0
China_rumen2257	0	0	0	0	0	1	0	0	0	0	0	0	0	0	0	0	0	0	0	0	0	0	0	0	0	0	0	0	0	0	0	0	0	0	0	0	0	0	0	0	0	0	0	0	0	0	0	0	0
China_rumen2258	1	0	0	0	0	0	0	0	0	0	0	0	0	0	0	0	0	0	0	0	0	0	0	0	0	0	0	0	0	0	0	0	0	0	0	0	0	0	0	0	0	0	0	0	0	0	0	0	0
China_rumen2259	0	0	0	0	0	0	1	0	0	0	1	0	0	0	0	0	0	0	0	0	0	0	0	0	0	0	0	1	0	0	0	0	0	0	0	0	0	0	0	0	1	0	0	0	1	1	0	0	0
China_rumen226	0	0	0	0	0	1	1	2	0	0	0	0	1	0	0	0	1	0	0	0	0	0	0	0	0	0	0	0	0	0	0	0	0	0	0	0	0	0	0	0	0	0	0	0	0	0	0	0	0
China_rumen2260	0	0	1	0	0	0	1	1	1	0	0	0	0	0	0	0	0	0	0	0	0	0	0	0	0	0	0	0	0	0	0	0	0	0	0	0	0	0	0	0	0	0	0	0	0	0	0	0	0
China_rumen2261	0	0	0	0	0	1	0	1	0	0	1	0	0	0	0	0	0	0	0	0	0	0	0	0	0	0	0	0	0	0	0	0	0	0	0	0	0	0	0	0	1	0	0	0	0	0	0	0	0
China_rumen2262	0	0	0	0	0	1	0	0	1	0	0	0	0	0	0	0	0	0	0	0	0	0	0	0	0	0	0	0	0	0	0	0	0	0	0	0	0	0	0	0	0	0	0	0	0	0	0	0	0
China_rumen2263	0	0	0	0	0	1	0	0	0	0	1	0	0	0	0	0	0	0	0	0	0	0	0	0	0	0	0	0	0	0	0	0	0	0	0	0	0	0	0	0	1	0	0	0	0	0	0	0	0
China_rumen2264	0	0	0	0	0	0	0	1	0	0	0	0	1	0	0	0	0	0	0	0	0	0	0	0	0	0	0	0	0	0	0	0	0	0	0	0	0	0	0	0	0	0	0	0	0	0	0	0	0
China_rumen2265	0	0	0	0	0	0	0	1	0	0	1	0	0	0	0	0	0	0	0	0	0	0	0	0	0	0	0	0	0	0	0	0	0	0	0	0	0	0	0	0	1	0	0	0	0	0	0	0	0
China_rumen2266	0	0	0	0	0	1	0	0	0	0	0	0	0	0	0	0	0	0	0	0	0	0	0	0	0	0	0	0	0	0	0	0	0	0	0	0	0	0	0	0	1	0	0	0	0	0	0	0	0
China_rumen2267	1	1	0	0	1	1	0	1	1	0	1	0	1	0	0	0	0	0	0	0	0	0	0	0	0	0	0	0	0	0	0	0	0	0	0	0	0	0	0	0	1	0	0	0	0	0	0	0	0
China_rumen2268	0	0	0	0	0	1	2	1	0	0	0	0	0	0	0	0	0	0	0	0	0	0	0	0	0	0	0	0	0	0	0	0	0	0	0	0	0	0	0	0	1	0	0	0	0	0	0	0	0
China_rumen2269	0	0	0	0	0	1	0	1	1	0	1	0	0	0	0	0	0	0	0	0	0	0	0	0	0	0	0	0	0	0	0	0	0	0	0	0	0	0	0	0	1	0	0	0	0	0	0	0	0
China_rumen227	0	0	0	0	0	2	0	0	0	0	1	0	0	0	0	0	0	0	0	0	0	0	0	0	0	0	0	0	0	0	0	0	0	0	0	0	0	0	0	0	1	0	0	0	0	0	0	0	0
China_rumen2270	0	0	0	0	0	1	0	0	0	0	1	0	0	0	0	0	0	0	0	0	0	0	0	0	0	0	0	0	0	0	0	0	0	0	0	0	0	0	0	0	1	0	0	0	0	0	0	0	0
China_rumen2272	0	0	0	1	0	0	0	0	0	0	0	0	0	0	0	0	0	0	0	0	0	0	0	0	0	0	0	0	0	0	0	0	0	0	0	0	0	0	0	0	1	0	0	0	0	0	0	0	0
China_rumen2273	0	0	0	0	1	2	1	1	1	0	0	0	0	0	0	0	0	0	0	0	0	0	0	0	0	0	0	0	0	0	0	0	0	0	0	0	0	0	0	0	0	0	0	0	0	0	0	0	0
China_rumen2274	0	0	0	0	0	0	0	0	0	0	0	0	0	0	0	0	0	0	0	0	0	0	0	0	0	0	0	0	0	0	0	0	0	0	0	0	0	0	0	0	0	0	0	0	0	0	0	0	0
China_rumen2275	0	0	0	0	0	1	0	0	0	0	0	0	0	0	0	0	0	0	0	0	0	0	0	0	0	0	0	0	0	0	0	0	0	0	0	0	0	0	0	0	0	0	0	0	0	0	0	0	0
China_rumen2276	0	0	0	0	0	1	0	1	0	0	0	0	0	0	0	0	0	0	0	0	0	0	0	0	0	0	0	0	0	0	0	0	0	0	0	0	0	0	0	0	1	0	0	0	0	0	0	0	0
China_rumen2277	0	0	0	0	1	1	0	0	1	0	0	0	0	0	0	0	0	0	0	0	0	0	0	0	0	0	0	0	0	0	0	0	0	0	0	0	0	0	0	0	0	0	0	0	0	0	0	0	0
China_rumen2278	0	0	0	0	0	0	0	0	0	0	0	0	0	0	0	0	0	0	0	0	0	0	0	0	0	0	0	0	0	0	1	0	0	0	0	0	0	0	0	0	0	0	0	2	0	0	0	0	0
China_rumen2279	0	0	0	0	0	2	0	0	1	0	0	0	0	0	0	0	0	0	0	0	0	0	0	0	0	0	0	0	0	0	0	0	0	0	0	0	0	0	0	0	0	0	0	0	0	0	0	0	0
China_rumen228	1	1	0	0	0	0	0	2	0	0	0	0	1	0	1	0	0	0	0	0	0	0	0	0	0	0	0	0	0	0	0	0	0	0	0	0	0	0	0	0	0	0	0	0	0	0	1	0	0
China_rumen2280	0	0	0	0	0	0	0	2	0	0	0	0	0	0	0	0	0	0	0	0	0	0	0	0	0	0	0	0	0	0	0	0	0	0	0	0	0	0	0	0	0	0	0	0	0	0	0	0	0
China_rumen2283	0	0	0	0	0	1	0	1	0	0	1	0	0	0	0	0	0	0	0	0	0	0	0	0	0	0	0	0	0	0	0	0	0	0	0	0	0	0	0	0	1	0	0	0	0	0	0	0	0
China_rumen2284	0	0	0	0	0	0	0	1	0	0	0	0	0	0	0	0	0	0	0	0	0	0	0	0	0	1	0	0	0	0	0	0	0	0	0	0	0	0	0	0	0	0	0	0	0	0	0	0	0
China_rumen2285	0	0	0	0	1	0	0	1	0	1	1	0	0	0	0	0	0	0	0	0	0	0	0	0	0	0	0	0	0	0	0	0	0	0	0	0	1	0	0	0	1	0	0	0	0	0	0	0	0
China_rumen2286	0	0	0	1	0	1	0	0	0	0	0	0	0	0	0	0	0	0	0	0	0	0	0	0	0	0	0	0	0	0	0	0	0	0	0	0	0	0	0	0	0	0	0	0	0	0	0	0	0
China_rumen2287	1	1	0	1	0	0	0	0	0	0	0	0	0	0	0	0	0	0	0	0	0	0	0	0	0	0	0	0	0	0	0	0	0	0	0	0	0	0	0	0	0	0	0	0	0	0	0	0	0
China_rumen2288	0	0	1	0	0	0	0	0	0	0	0	0	0	0	0	0	0	0	0	0	0	0	0	0	0	0	0	0	0	0	0	0	0	0	0	0	0	0	0	0	0	0	0	0	0	0	0	0	0
China_rumen2289	0	0	0	0	0	0	0	1	0	0	0	0	1	0	0	0	0	0	0	0	0	0	0	0	0	0	0	0	0	0	0	0	0	0	0	0	0	0	0	0	0	0	0	0	0	0	0	0	0
China_rumen229	0	0	0	0	0	2	0	0	0	0	0	0	0	0	0	0	0	0	0	0	0	0	0	0	0	0	0	0	0	0	0	0	0	0	0	0	0	0	0	0	1	0	0	0	0	0	0	0	0
China_rumen2291	0	0	0	0	0	0	0	1	1	0	0	0	0	0	0	0	0	0	0	0	0	0	0	0	0	0	0	0	0	0	0	0	0	0	0	0	0	0	0	0	0	0	0	0	0	0	0	0	0
China_rumen2292	0	1	0	0	0	0	0	1	0	0	0	0	0	0	0	0	0	0	0	0	0	0	0	0	0	0	0	0	0	0	0	0	0	0	0	0	0	0	0	0	1	0	0	0	0	0	0	0	0
China_rumen2294	0	0	0	0	0	0	0	0	0	0	0	0	0	0	0	0	0	0	0	0	0	0	0	0	0	0	0	0	0	0	0	0	0	0	0	0	0	0	0	0	0	0	0	0	0	0	0	0	0
China_rumen2295	0	0	0	0	0	1	0	2	0	0	0	0	0	0	0	0	2	0	0	0	0	0	0	0	0	0	0	0	0	0	0	0	0	0	0	0	0	0	0	0	1	0	0	0	0	0	0	0	0
China_rumen2296	0	0	0	0	0	0	0	2	0	0	0	0	0	0	0	0	0	0	0	0	0	0	0	0	0	0	0	0	0	0	0	0	0	0	0	0	0	0	0	0	0	0	0	0	0	0	0	0	0
China_rumen2297	0	0	0	0	0	1	0	0	0	0	0	0	0	0	0	0	0	0	0	0	0	0	0	0	0	0	0	0	0	0	0	0	0	0	0	0	0	0	0	0	1	0	0	0	0	0	0	0	0
China_rumen2298	0	0	0	0	0	1	0	0	0	0	0	0	0	0	0	0	0	0	0	0	0	0	0	0	0	0	0	0	0	0	0	0	0	0	0	0	0	0	0	0	0	0	0	0	0	0	0	0	0
China_rumen2299	0	0	0	0	0	2	0	0	0	0	0	0	0	0	0	0	0	0	0	0	0	0	0	0	0	0	0	0	0	0	0	0	0	0	0	0	0	0	0	0	1	0	0	0	0	0	0	0	0
China_rumen23	0	0	0	0	0	0	0	0	0	0	0	0	0	0	0	0	0	0	0	0	0	0	0	0	0	0	0	0	0	0	0	0	0	0	0	0	0	0	0	0	0	0	0	0	0	0	0	0	0
China_rumen2300	0	0	0	1	0	0	0	2	0	0	0	0	1	0	1	0	0	0	0	0	0	0	0	0	0	0	0	0	0	0	0	0	0	0	0	0	0	0	0	0	1	0	0	0	0	0	1	0	0
China_rumen2301	0	0	0	0	1	1	1	1	1	0	0	0	0	0	0	0	0	0	0	0	0	0	0	0	0	0	0	0	0	0	0	0	0	0	0	0	0	0	0	0	0	0	0	0	0	0	0	0	0
China_rumen2302	0	0	0	0	0	0	0	0	0	0	0	0	0	0	0	0	0	0	0	0	0	0	0	0	0	0	0	0	0	0	0	0	0	0	0	0	0	0	0	0	0	0	0	0	0	0	0	0	0
China_rumen2303	0	0	0	0	0	1	0	0	0	0	0	0	0	0	0	0	0	0	0	0	0	0	0	0	0	0	0	0	0	0	0	0	0	0	0	0	0	0	0	0	0	0	0	0	0	0	0	0	0
China_rumen2304	0	0	1	1	0	1	1	2	0	0	0	0	0	0	0	0	1	0	0	0	0	0	0	0	0	0	0	0	0	0	0	0	0	0	0	0	0	0	0	0	0	0	0	0	0	0	0	0	0
China_rumen2305	0	1	0	0	0	1	1	2	0	0	0	0	0	0	0	0	0	0	0	0	0	0	0	0	0	1	0	0	0	0	0	0	0	0	0	0	0	0	0	0	0	0	0	0	0	0	0	0	0
China_rumen2306	0	0	0	0	0	0	0	1	0	0	0	0	0	0	0	0	0	0	0	0	0	0	0	0	0	0	0	0	0	0	0	0	0	0	0	0	0	0	0	0	0	0	0	0	1	1	0	1	0
China_rumen2307	0	0	0	1	0	1	1	1	0	0	0	0	0	0	0	0	0	0	0	0	0	0	0	0	0	0	0	0	0	0	0	0	0	0	0	0	0	0	0	0	0	0	0	0	0	0	0	0	0
China_rumen2308	0	0	0	0	0	0	0	0	0	0	1	0	0	0	0	0	0	0	0	0	0	0	0	0	0	0	0	0	0	0	0	0	0	0	0	0	0	0	0	0	1	0	0	0	0	0	0	0	0
China_rumen2309	0	0	0	0	0	1	0	1	0	0	0	0	0	0	0	0	0	0	0	0	0	0	0	0	0	0	0	1	0	0	0	0	0	0	0	0	0	0	0	0	0	0	0	0	0	0	0	0	0
China_rumen231	0	0	0	0	0	2	0	0	0	0	0	0	0	0	0	0	0	0	0	0	0	0	0	0	0	0	0	0	0	0	0	0	0	0	0	0	0	0	0	0	0	0	0	0	0	0	0	0	0
China_rumen2310	0	0	0	1	0	1	0	2	0	0	0	0	1	0	0	0	0	0	0	0	0	0	0	0	0	0	0	0	0	0	0	0	0	0	0	0	0	0	0	0	0	0	0	0	0	0	0	0	0
China_rumen2311	0	0	0	0	0	0	0	0	0	0	0	0	0	0	0	0	0	0	0	0	0	0	0	0	0	0	0	1	0	0	0	0	0	0	0	0	0	0	0	0	0	0	0	0	0	0	0	0	0
China_rumen2312	0	0	0	0	0	1	0	0	0	0	1	0	0	0	0	0	0	0	0	0	0	0	0	0	0	0	0	0	0	0	0	0	0	0	0	0	0	0	0	0	1	0	0	0	0	0	0	0	0
China_rumen2313	0	0	0	0	0	2	0	0	0	0	1	0	0	0	0	0	0	0	0	0	0	0	0	0	0	0	0	0	0	0	0	0	0	0	0	0	0	0	0	0	0	0	0	0	0	0	0	0	0
China_rumen2314	0	0	0	0	0	1	1	3	0	0	1	0	1	0	0	0	1	0	0	0	0	0	0	0	0	0	0	0	0	0	0	0	0	0	0	0	0	0	0	0	1	0	0	0	0	0	1	0	0
China_rumen2315	0	0	1	0	0	1	0	1	0	0	0	0	1	0	0	0	1	0	0	0	0	0	0	0	0	0	0	0	0	0	0	0	0	0	0	0	0	0	0	0	0	0	0	0	0	0	0	0	0
China_rumen2316	0	0	0	2	0	0	0	0	0	0	0	0	1	0	0	0	0	0	0	0	0	0	0	0	0	0	0	0	0	0	0	0	0	0	0	0	0	0	0	0	1	0	0	0	0	0	0	0	0
China_rumen2317	0	0	0	0	1	0	0	1	0	0	1	0	0	0	0	0	0	0	0	0	0	0	0	0	0	0	0	0	0	0	0	0	0	0	0	0	0	0	0	0	1	0	0	0	0	0	0	0	0
China_rumen2318	0	0	0	0	0	0	0	1	1	0	0	0	0	0	0	0	0	0	0	0	0	0	0	0	0	1	0	0	0	1	0	1	0	0	0	0	0	0	0	0	0	0	1	2	0	0	1	0	0
China_rumen2319	0	0	1	1	0	1	0	2	0	0	1	0	1	0	0	0	0	0	0	0	0	0	0	0	0	0	0	0	0	0	0	0	0	0	0	0	0	0	0	0	1	0	0	0	0	0	0	0	0
China_rumen232	1	1	0	0	0	1	0	1	0	0	0	0	0	0	0	0	0	0	0	0	0	0	0	0	0	0	0	0	0	0	0	0	0	0	0	0	0	0	0	0	1	0	0	0	0	0	0	0	0
China_rumen2320	0	0	0	0	1	0	1	2	2	0	0	0	0	0	0	0	0	0	0	0	0	0	0	0	0	0	0	0	0	0	0	0	0	0	0	0	0	0	0	0	0	0	0	0	0	0	0	0	0
China_rumen2321	0	0	0	0	0	1	1	2	1	0	0	0	0	0	0	0	0	0	0	0	0	0	0	0	0	0	0	0	0	0	0	0	0	0	0	0	0	0	0	0	0	0	0	0	0	0	0	0	0
China_rumen2322	0	0	0	0	0	1	0	0	0	0	1	0	1	0	0	0	0	0	0	0	0	0	0	0	0	0	0	0	0	0	0	0	0	0	0	0	0	0	0	0	2	0	0	0	0	0	0	0	0
China_rumen233	0	0	0	1	0	1	0	1	0	0	1	0	0	0	0	0	0	0	0	0	0	0	0	0	0	0	0	0	0	0	0	0	0	0	0	0	0	0	0	0	1	0	0	0	0	0	0	0	0
China_rumen234	0	0	0	1	0	1	0	1	0	0	0	0	0	0	0	0	0	0	0	0	0	0	0	0	0	0	0	0	0	0	0	0	0	0	0	0	0	0	0	0	0	0	0	0	0	0	0	0	0
China_rumen235	0	0	0	0	0	1	0	1	1	0	0	0	0	0	0	0	0	0	0	0	0	0	0	0	0	0	0	0	0	0	0	0	0	0	0	0	0	0	0	0	0	0	0	0	0	0	0	0	0
China_rumen236	1	0	0	0	0	0	0	1	0	0	0	0	0	0	0	0	0	0	0	0	0	0	0	0	0	0	0	0	0	0	0	0	0	0	0	0	0	0	0	0	1	0	0	0	0	0	0	0	0
China_rumen238	0	0	0	0	0	3	0	0	0	0	1	0	0	0	0	0	0	0	0	0	0	0	0	0	0	0	0	0	0	0	0	0	0	0	0	0	0	0	0	0	1	0	0	0	0	0	0	0	0
China_rumen239	0	0	0	0	0	0	0	2	0	0	0	0	1	0	0	0	1	0	0	0	0	0	0	0	0	1	0	0	0	0	0	0	0	0	0	0	0	0	0	0	0	0	0	0	0	0	0	0	0
China_rumen24	0	0	0	0	0	0	0	0	0	0	1	0	0	0	0	0	0	0	0	0	0	0	0	0	0	0	0	0	0	0	0	0	0	0	0	0	0	0	0	0	1	0	0	0	0	0	0	0	0
China_rumen241	1	1	0	0	0	0	0	1	0	0	0	0	0	0	0	0	0	0	0	0	0	0	0	0	0	0	0	0	0	0	0	0	0	0	0	0	0	0	0	0	0	0	0	0	0	0	0	0	0
China_rumen242	0	0	0	0	0	0	0	0	0	0	0	0	0	0	0	0	0	0	0	0	0	0	0	0	0	0	0	0	0	0	0	0	0	0	0	0	0	0	0	0	0	0	0	0	0	0	0	0	0
China_rumen243	0	0	0	0	0	2	0	1	0	1	0	0	0	0	0	0	0	0	0	0	0	0	0	0	0	0	0	0	0	0	0	0	0	0	0	0	0	0	0	0	0	0	0	0	0	0	0	0	0
China_rumen245	0	0	0	1	0	0	0	1	0	0	1	0	1	0	0	0	1	0	0	0	0	0	0	0	0	0	0	0	0	0	0	0	0	0	0	0	0	0	0	0	3	0	0	0	0	0	0	0	0
China_rumen246	0	0	0	0	0	1	0	0	0	0	0	0	0	0	0	0	0	0	0	0	0	0	0	0	0	0	0	0	0	0	0	0	0	0	0	0	0	0	0	0	0	0	0	0	0	0	0	0	0
China_rumen247	0	0	0	1	0	0	1	0	0	0	1	0	0	0	0	0	1	0	0	0	0	0	0	0	0	0	0	0	0	0	0	0	0	0	0	0	0	0	0	0	0	0	0	0	1	1	0	0	0
China_rumen248	0	0	0	0	0	0	0	0	1	0	1	0	0	0	0	0	0	0	0	0	0	0	0	0	0	0	0	0	0	0	0	0	0	0	0	0	0	0	0	0	1	0	0	0	0	0	0	0	0
China_rumen249	0	0	0	0	0	1	0	1	0	0	0	0	0	0	0	0	0	0	0	0	0	0	0	0	0	0	0	0	0	0	0	0	0	0	0	0	0	0	0	0	0	0	0	0	0	0	0	0	0
China_rumen25	0	0	0	0	1	1	0	1	0	1	0	0	0	0	0	0	0	0	0	0	0	0	0	0	0	0	0	0	0	0	0	0	0	0	0	0	0	0	0	0	0	0	0	0	0	0	0	0	0
China_rumen250	0	0	0	0	0	0	0	1	0	0	0	0	1	0	2	0	0	0	0	0	0	0	0	0	0	0	0	0	0	0	0	0	0	0	0	0	0	0	0	0	0	0	0	0	0	0	0	0	0
China_rumen251	0	0	0	0	0	1	0	0	0	0	0	0	0	0	0	0	0	0	0	0	0	0	0	0	0	0	0	0	0	0	0	0	0	0	0	0	0	0	0	0	0	0	0	0	0	0	0	0	0
China_rumen252	0	0	0	0	0	0	0	0	1	0	1	0	0	0	0	0	0	0	0	0	0	0	0	0	0	0	0	0	0	0	0	0	0	0	0	0	0	0	0	0	2	0	0	0	0	0	0	0	0
China_rumen253	0	0	0	1	0	0	0	1	0	0	1	0	0	0	0	0	0	0	0	0	0	0	0	0	0	0	0	0	0	0	0	0	0	0	0	0	0	0	0	0	2	0	0	0	0	0	0	0	0
China_rumen254	0	0	0	0	0	1	0	1	0	0	1	0	0	0	0	0	0	0	0	0	0	0	0	0	0	0	0	0	0	0	0	0	0	0	0	0	0	0	0	0	1	0	0	0	0	0	0	0	0
China_rumen255	0	0	0	0	0	1	0	0	0	0	0	0	0	0	0	0	0	0	0	0	0	0	0	0	0	0	0	0	0	0	0	0	0	0	0	0	0	0	0	0	0	0	0	0	0	0	0	0	0
China_rumen256	0	0	0	1	0	0	0	1	0	0	0	0	0	0	0	0	0	0	0	0	0	0	0	0	0	0	0	0	0	0	0	0	0	0	0	0	0	0	0	0	1	0	0	0	0	0	0	0	0
China_rumen257	1	1	0	0	0	1	0	1	0	0	0	0	0	0	1	0	0	0	0	0	0	0	0	0	0	0	0	0	0	0	0	0	0	0	0	0	0	0	0	0	0	0	0	0	1	1	0	2	0
China_rumen258	0	0	0	0	0	0	0	1	0	0	0	0	0	0	0	0	0	0	0	0	0	0	0	0	0	0	0	0	0	0	0	0	0	0	0	0	0	0	0	0	1	0	0	0	0	0	0	0	0
China_rumen259	0	0	0	1	0	1	0	2	0	0	1	0	0	0	0	0	0	0	0	0	0	0	0	0	0	0	0	0	0	0	0	0	0	0	0	0	0	0	0	0	1	0	0	0	0	0	0	0	0
China_rumen26	0	0	0	0	0	1	0	0	0	1	0	0	0	0	0	0	0	0	0	0	0	0	0	0	0	0	0	0	0	0	0	0	0	0	0	0	0	0	0	0	0	0	0	0	0	0	0	0	0
China_rumen261	0	0	0	0	0	1	0	1	0	0	1	0	0	0	0	0	0	0	0	0	0	0	0	0	0	0	0	0	0	0	0	0	0	0	0	0	0	0	0	0	1	0	0	0	0	0	0	0	0
China_rumen262	0	0	0	0	0	1	0	1	0	0	1	0	0	0	0	0	0	0	0	0	0	0	0	0	0	0	0	0	0	0	0	0	0	0	0	0	0	0	0	0	1	0	0	0	0	0	0	0	0
China_rumen263	0	0	0	0	1	0	0	0	0	0	0	0	0	1	0	0	0	0	0	0	0	0	0	0	0	0	1	0	0	0	0	0	0	0	0	0	0	0	0	0	0	0	0	0	0	0	0	0	0
China_rumen264	0	0	0	1	0	0	0	1	0	0	0	0	0	0	0	0	0	0	0	0	0	0	0	0	0	0	0	0	0	0	0	0	0	0	0	0	0	0	0	0	2	0	0	0	0	0	0	0	0
China_rumen265	0	0	0	1	0	0	0	1	0	0	1	0	0	0	0	0	0	0	0	0	0	0	0	0	0	0	0	0	0	0	0	0	0	0	0	0	0	0	0	0	1	0	0	0	0	0	0	0	0
China_rumen266	0	0	0	0	0	1	0	1	0	0	0	0	0	0	0	0	0	0	0	0	0	0	0	0	0	0	0	0	0	0	0	0	0	0	0	0	0	0	0	0	0	0	0	0	0	0	0	0	0
China_rumen267	0	0	0	0	0	0	1	1	0	0	1	0	0	0	1	0	1	0	0	0	0	0	0	0	0	0	0	0	0	0	0	0	0	0	0	0	0	0	0	0	2	0	0	0	0	0	0	0	0
China_rumen268	0	0	0	1	0	1	0	1	0	0	0	0	1	0	0	0	0	0	0	0	0	0	0	0	0	0	0	0	0	0	0	0	0	0	0	0	0	0	0	0	0	0	0	0	0	0	0	0	0
China_rumen269	0	0	0	0	0	1	0	1	0	0	0	0	0	0	0	0	0	0	0	0	0	0	0	0	0	0	0	0	0	0	0	0	0	0	0	0	0	0	0	0	0	0	0	0	1	1	0	1	0
China_rumen27	0	0	0	0	0	2	1	0	2	0	0	0	0	0	0	0	0	0	0	0	0	0	0	0	0	0	0	0	0	0	0	0	0	0	0	0	0	0	0	0	0	0	0	0	0	0	0	0	0
China_rumen270	0	0	0	1	0	1	0	1	0	0	0	0	0	0	0	0	0	0	0	0	0	0	0	0	0	1	0	0	0	0	0	0	0	0	0	0	0	0	0	0	0	0	0	0	0	0	0	0	0
China_rumen273	0	0	0	2	0	1	0	1	0	0	0	0	0	0	0	0	0	0	0	0	0	0	0	0	0	0	0	0	0	0	0	0	0	0	0	0	0	0	0	0	1	0	0	0	0	0	0	0	0
China_rumen274	0	0	0	1	0	0	0	0	0	0	1	0	0	0	0	1	0	0	0	0	0	0	0	0	0	0	0	0	0	0	0	0	0	0	0	0	0	0	0	0	2	0	0	0	0	0	0	0	0
China_rumen275	0	0	0	0	0	1	0	1	1	1	1	0	0	0	0	0	0	0	0	0	0	0	0	0	0	0	1	0	0	0	0	0	0	0	0	0	1	0	0	0	1	0	0	0	0	0	0	0	0
China_rumen276	0	0	0	0	0	2	0	0	1	0	1	0	0	0	0	0	0	0	0	0	0	0	0	0	0	0	0	0	0	0	0	0	0	0	0	0	0	0	0	0	1	0	0	0	0	0	0	0	0
China_rumen277	0	0	0	0	0	1	0	1	1	0	0	0	0	0	0	0	0	0	0	0	0	0	0	0	0	0	0	0	0	0	0	0	0	0	0	0	0	0	0	0	0	0	0	0	0	0	0	0	0
China_rumen278	0	0	0	0	0	0	0	1	0	0	1	0	0	0	0	0	0	0	0	0	0	0	0	0	0	0	0	0	0	0	0	0	0	0	0	0	0	0	0	0	1	0	0	0	0	0	0	0	0
China_rumen279	0	0	0	0	0	1	0	0	0	0	0	0	1	0	1	0	0	0	0	0	0	0	0	0	0	0	0	0	0	0	0	0	0	0	0	0	0	0	0	0	0	0	0	0	0	0	0	0	0
China_rumen28	0	0	0	0	0	0	0	0	0	0	0	0	0	0	0	0	0	0	0	0	0	0	0	1	0	0	0	0	0	0	0	0	0	0	1	0	0	0	0	0	0	0	0	0	0	0	0	0	0
China_rumen280	0	0	0	0	0	0	0	0	0	0	1	0	0	0	0	1	0	0	0	0	0	0	0	0	0	0	0	0	0	0	0	0	0	0	0	0	0	0	0	0	2	0	0	0	0	0	0	0	0
China_rumen282	0	0	0	0	0	1	0	0	0	0	1	0	0	0	0	0	0	0	0	0	0	0	0	0	0	0	0	0	0	0	0	0	0	0	0	0	0	0	0	0	1	0	0	0	0	0	0	0	0
China_rumen283	1	1	0	2	0	1	0	2	0	0	0	0	0	0	0	0	1	0	0	0	0	0	0	0	0	1	0	0	0	0	0	0	0	0	0	0	0	0	0	0	0	0	0	0	0	0	0	0	0
China_rumen284	1	0	0	0	0	0	0	0	0	0	0	0	1	0	0	0	0	0	0	0	0	0	0	0	0	0	0	0	0	0	0	0	0	0	0	0	0	0	0	0	0	0	0	0	0	0	1	0	0
China_rumen285	1	1	0	0	0	0	1	2	0	0	0	0	1	0	0	0	0	0	0	0	0	0	0	0	0	1	0	0	0	0	0	0	0	0	0	0	0	0	0	0	0	0	0	0	0	0	0	0	0
China_rumen286	0	0	0	0	0	1	0	0	0	0	0	0	0	0	0	0	0	0	0	0	0	0	0	0	0	0	0	0	0	0	0	0	0	0	0	0	0	0	0	0	0	0	0	0	0	0	0	0	0
China_rumen287	0	0	0	0	0	0	0	1	0	0	1	0	0	0	0	1	0	0	0	0	0	0	0	0	0	0	0	0	0	0	0	0	0	0	0	0	0	0	0	0	1	0	0	0	0	0	0	0	0
China_rumen288	0	0	0	0	0	1	0	1	0	0	0	0	0	0	0	0	0	0	0	0	0	0	0	0	0	0	0	2	0	0	0	0	0	0	0	0	0	0	0	0	0	0	0	0	0	0	0	0	0
China_rumen289	0	0	0	0	0	0	0	0	0	0	0	0	0	0	0	0	0	0	0	0	0	0	0	0	0	0	0	0	0	0	0	0	0	0	0	0	0	0	0	0	0	0	0	0	0	0	0	0	0
China_rumen290	0	0	0	0	0	1	0	0	0	0	0	0	0	0	0	0	0	0	0	0	0	0	0	0	0	0	0	0	0	0	0	0	0	0	0	0	0	0	0	0	0	0	0	3	0	0	0	0	0
China_rumen291	0	0	0	0	0	0	1	2	0	0	0	0	0	0	0	0	0	0	0	0	0	0	0	0	0	0	0	0	0	0	0	0	0	0	0	0	0	0	0	0	0	0	0	0	0	0	0	0	0
China_rumen293	0	0	0	0	0	0	0	0	0	0	0	0	0	0	0	0	0	0	0	0	0	0	0	0	0	0	0	0	0	0	0	0	0	0	0	0	0	0	0	0	0	0	0	0	0	0	0	0	0
China_rumen294	1	0	0	0	0	0	0	1	0	0	0	0	0	0	0	0	0	0	0	0	0	0	0	0	0	0	0	0	0	0	0	0	0	0	0	0	0	0	0	0	0	0	0	0	0	0	0	0	0
China_rumen295	0	0	0	1	0	0	0	1	0	0	0	0	0	0	0	0	0	0	0	0	0	0	0	0	0	0	0	0	0	0	0	0	0	0	0	0	0	0	0	0	0	0	0	0	0	0	0	0	0
China_rumen296	0	0	0	0	0	1	0	1	0	0	1	0	0	0	0	0	0	0	0	0	0	0	0	0	0	0	0	0	0	0	0	0	0	0	0	0	0	0	0	0	1	0	0	0	0	0	0	0	0
China_rumen297	0	0	0	0	0	1	1	1	1	0	0	0	0	0	0	0	0	0	0	0	0	0	0	0	0	0	0	0	0	0	0	0	0	0	0	0	0	0	0	0	0	0	0	0	0	0	0	0	0
China_rumen298	0	0	0	1	0	0	0	1	0	0	0	0	1	0	1	0	0	0	0	0	0	0	0	0	0	0	0	0	0	0	0	0	0	0	0	0	0	0	0	0	0	0	0	0	0	0	0	0	0
China_rumen299	0	0	0	0	0	0	1	0	0	0	0	0	0	0	0	0	0	0	0	0	0	0	0	0	0	0	0	0	0	0	0	0	0	0	0	0	0	0	0	0	0	0	0	0	0	0	0	0	0
China_rumen3	0	0	0	0	0	0	0	0	0	0	0	0	0	0	0	0	0	0	0	0	0	0	0	0	0	0	0	0	0	0	1	0	0	0	0	0	0	0	0	0	0	0	0	5	0	0	0	0	0
China_rumen30	0	1	0	1	0	1	0	1	1	0	0	0	0	0	0	0	0	0	0	0	0	0	0	0	0	1	0	0	0	0	0	0	0	0	0	0	0	0	0	0	0	0	0	0	0	0	0	0	0
China_rumen300	0	0	0	0	0	2	0	1	1	0	0	0	0	0	0	0	0	0	0	0	0	0	0	0	0	0	0	0	0	0	0	0	0	0	0	0	0	0	0	0	0	0	0	0	0	0	0	0	0
China_rumen301	0	0	0	0	0	1	0	1	0	0	0	0	0	0	0	0	0	0	0	0	0	0	0	0	0	0	0	0	0	0	0	0	0	0	0	0	0	0	0	0	0	0	0	0	0	0	0	0	0
China_rumen302	0	0	0	0	0	1	0	1	0	0	2	0	0	0	0	0	0	0	0	0	0	0	0	0	0	0	0	0	0	0	0	0	0	0	0	0	0	0	0	0	2	0	0	0	0	0	0	0	0
China_rumen303	0	0	0	0	0	2	0	1	0	0	1	0	0	0	0	0	0	0	0	0	0	0	0	0	0	0	0	0	0	0	0	0	0	0	0	0	0	0	0	0	3	0	0	0	0	0	0	0	0
China_rumen304	0	0	0	0	0	0	0	0	0	0	1	0	0	0	0	0	0	0	0	0	0	0	0	0	0	0	0	0	0	0	0	0	0	0	0	0	0	0	0	0	1	0	0	0	0	0	0	0	0
China_rumen305	0	0	0	1	0	0	0	0	0	0	0	0	0	0	0	0	0	0	0	0	0	0	0	0	0	0	0	0	0	0	0	0	0	0	0	0	0	0	0	0	0	0	0	0	0	0	0	0	0
China_rumen306	0	0	1	1	0	1	1	1	0	0	0	0	1	0	0	0	4	0	0	0	0	0	0	0	0	0	0	0	0	0	0	0	0	0	0	0	0	0	0	0	0	0	0	0	0	0	0	0	0
China_rumen307	0	0	0	0	0	0	0	1	0	0	1	0	1	0	1	0	0	0	0	0	0	0	0	0	0	0	0	0	0	0	0	0	0	0	0	0	0	0	0	0	1	0	0	0	0	0	0	0	0
China_rumen308	1	2	0	0	0	1	0	0	0	0	1	0	1	0	1	0	0	0	0	0	0	0	0	0	0	0	0	0	0	0	0	0	0	0	0	0	0	0	0	0	1	0	0	0	0	0	0	0	0
China_rumen309	0	0	0	1	0	0	1	3	0	0	0	0	1	0	1	0	0	0	0	0	0	0	0	0	0	1	0	0	0	0	0	0	0	0	0	0	0	0	0	0	0	0	0	0	0	0	0	0	0
China_rumen31	0	0	0	0	0	0	1	1	1	0	0	0	0	0	0	0	0	0	0	0	0	0	0	0	0	0	0	0	0	0	0	0	0	0	0	0	0	0	0	0	0	0	0	0	0	0	0	0	0
China_rumen310	0	0	0	0	0	1	0	1	0	0	2	0	1	0	0	1	0	0	0	0	0	0	0	0	0	0	0	0	0	0	0	0	0	0	0	0	0	0	0	0	3	0	0	0	0	0	0	0	0
China_rumen311	0	0	0	0	0	0	0	0	0	0	0	0	0	0	0	0	0	0	0	0	0	0	0	0	0	0	0	0	0	0	0	0	0	0	0	0	0	0	0	0	0	0	0	0	0	0	0	0	0
China_rumen312	0	0	0	0	0	1	0	1	0	0	1	0	0	0	0	0	0	0	0	0	0	0	0	0	0	0	0	0	0	0	0	0	0	0	0	0	0	0	0	0	1	0	0	0	0	0	0	0	0
China_rumen313	1	1	0	0	1	1	0	1	0	0	0	0	0	0	0	0	0	0	0	0	0	0	0	0	0	0	0	0	0	0	0	0	0	0	0	0	0	0	0	0	0	0	0	0	0	0	0	0	0
China_rumen314	0	0	0	0	0	1	1	1	0	0	1	0	0	0	0	0	0	0	0	0	0	0	0	0	0	0	0	0	0	0	0	0	0	0	0	0	0	0	0	0	2	0	0	0	0	0	0	0	0
China_rumen315	0	0	0	0	0	0	0	1	0	0	0	0	0	0	0	0	0	0	0	0	0	0	0	0	0	0	0	0	0	0	0	0	0	0	0	0	0	0	0	0	0	0	0	0	0	0	0	0	0
China_rumen316	0	0	0	1	0	2	0	0	0	0	1	0	0	0	0	0	0	0	0	0	0	0	0	0	0	0	0	0	0	0	0	0	0	0	0	0	0	0	0	0	2	0	0	0	0	0	0	0	0
China_rumen317	0	0	0	0	0	0	0	0	2	0	0	0	0	0	0	0	0	0	0	0	0	0	0	0	0	0	0	0	0	0	0	0	0	0	0	0	0	0	0	0	0	0	0	0	0	0	0	0	0
China_rumen318	0	0	0	0	1	1	0	1	1	0	0	0	0	0	0	0	0	0	0	0	0	0	0	0	0	0	0	0	0	0	0	0	0	0	0	0	0	0	0	0	0	0	0	0	0	0	0	0	0
China_rumen319	0	0	0	0	0	2	1	2	2	0	0	0	0	0	0	0	0	0	0	0	0	0	0	0	0	0	0	0	0	0	0	0	0	0	0	0	0	0	0	0	0	0	0	0	0	0	0	0	0
China_rumen32	0	0	0	1	0	0	0	1	0	0	0	0	1	0	0	0	0	0	0	0	0	0	0	0	0	0	0	0	0	0	0	0	0	0	0	0	0	0	0	0	0	0	0	0	0	0	0	0	0
China_rumen320	0	0	0	0	0	2	1	1	1	0	0	0	0	0	0	0	0	0	0	0	0	0	0	0	0	0	0	0	0	0	0	0	0	0	0	0	0	0	0	0	0	0	0	0	0	0	0	0	0
China_rumen321	0	0	0	0	0	3	0	1	0	0	1	0	0	0	0	0	0	0	0	0	0	0	0	0	0	0	0	0	0	0	0	0	0	0	0	0	0	0	0	0	1	0	0	0	0	0	0	0	0
China_rumen322	0	0	1	0	0	1	1	0	0	0	0	0	1	0	1	0	0	0	0	0	0	0	0	0	0	0	0	0	0	0	0	0	0	0	0	0	0	0	0	0	0	0	0	0	0	0	1	0	0
China_rumen324	0	0	0	0	0	0	0	0	0	0	0	0	0	0	0	0	0	0	0	0	0	0	0	0	0	0	0	1	0	0	0	0	0	0	0	0	0	0	0	0	1	0	0	0	0	0	0	0	0
China_rumen325	1	1	0	0	0	1	1	2	0	0	0	0	1	0	0	0	0	0	0	0	0	0	0	0	0	0	0	0	0	0	0	0	0	0	0	0	0	0	0	0	0	0	0	0	0	0	0	0	0
China_rumen326	0	0	0	0	1	2	0	1	0	0	0	0	0	0	0	0	0	0	0	0	0	0	0	0	0	0	0	0	0	0	0	0	0	0	0	0	0	0	0	0	0	0	0	0	0	0	0	0	0
China_rumen327	0	0	0	0	0	1	0	0	0	0	1	0	0	0	0	0	0	0	0	0	0	0	0	0	0	0	0	0	0	0	0	0	0	0	0	0	0	0	0	0	0	0	0	0	0	0	0	0	0
China_rumen328	0	0	0	0	0	0	1	0	0	0	0	0	0	0	0	0	0	0	0	0	0	0	0	0	0	0	0	0	0	0	0	0	0	0	0	0	0	0	0	0	0	0	0	0	0	0	0	0	0
China_rumen329	0	0	0	0	0	0	1	1	0	0	0	0	1	0	0	0	0	0	0	0	0	0	0	0	0	0	0	0	0	0	0	0	0	0	0	0	0	0	0	0	0	0	0	0	0	0	0	0	0
China_rumen33	0	0	0	0	0	2	0	1	3	0	1	0	0	0	0	0	0	0	0	0	0	0	0	0	0	0	0	0	0	0	0	0	0	0	0	0	0	0	0	0	1	0	0	0	0	0	0	0	0
China_rumen330	0	0	0	0	0	0	0	0	0	0	1	0	0	0	0	0	0	0	0	0	0	0	0	0	0	0	0	0	0	0	0	0	0	0	0	0	0	0	0	0	0	0	0	0	0	0	0	0	0
China_rumen332	0	0	0	0	1	2	0	1	0	0	0	0	0	0	0	0	0	0	0	0	0	0	0	0	0	0	0	0	0	0	0	0	0	0	0	0	0	0	0	0	0	0	0	0	0	0	0	0	0
China_rumen333	0	0	0	0	0	2	1	1	0	1	0	0	0	0	0	0	0	0	0	0	0	0	0	0	0	0	0	0	0	0	0	0	0	0	0	0	0	0	0	0	0	0	0	0	0	0	0	0	0
China_rumen334	0	0	0	0	1	0	0	0	0	1	1	0	0	0	0	0	0	0	0	0	0	0	0	0	0	0	0	0	0	0	0	0	0	0	0	0	0	0	0	0	0	0	0	0	0	0	0	0	0
China_rumen335	0	0	0	0	0	1	0	1	0	0	1	0	0	0	1	1	0	0	0	0	0	0	0	0	0	0	0	1	0	0	0	0	0	0	0	0	0	0	0	0	1	0	0	0	0	0	0	0	0
China_rumen336	0	0	0	0	0	0	0	0	0	0	0	0	0	0	0	0	0	0	0	0	0	0	0	0	0	0	0	0	0	0	0	0	0	0	0	0	0	0	0	0	1	0	0	0	0	0	0	0	0
China_rumen337	1	1	1	0	0	1	0	2	0	0	0	0	1	0	0	0	0	0	0	0	0	0	0	0	0	1	0	0	0	0	0	0	0	0	0	0	0	0	0	0	0	0	0	0	0	0	1	0	0
China_rumen338	0	0	0	0	0	1	0	1	2	0	0	0	0	0	0	0	0	0	0	0	0	0	0	0	0	0	0	0	0	0	0	0	0	0	0	0	0	0	0	0	0	0	0	0	0	0	0	0	0
China_rumen339	0	0	0	1	0	0	0	0	0	0	1	0	0	0	0	0	0	0	0	0	0	0	0	0	0	0	0	0	0	0	0	0	0	0	0	0	0	0	0	0	1	0	0	0	0	0	0	0	0
China_rumen34	0	0	0	0	0	0	0	1	0	0	0	0	0	0	0	0	0	0	0	0	0	0	0	0	0	0	0	0	0	0	0	0	0	0	0	0	0	0	0	0	0	0	0	0	0	0	0	0	0
China_rumen340	0	0	0	1	0	1	0	1	0	0	1	0	0	0	0	0	0	0	0	0	0	0	0	0	0	0	0	0	0	0	0	0	0	0	0	0	0	0	0	0	2	0	0	0	0	0	0	0	0
China_rumen341	0	0	0	1	0	0	0	1	0	0	0	0	1	0	1	0	0	0	0	0	0	0	0	0	0	0	0	0	0	0	0	0	0	0	0	0	0	0	0	0	0	0	0	0	0	0	0	0	0
China_rumen342	0	0	0	0	1	1	0	0	0	1	0	0	0	0	0	0	0	0	0	0	0	0	0	0	0	0	0	0	0	0	0	0	0	0	0	0	1	0	0	0	0	0	0	0	0	0	0	0	0
China_rumen343	0	0	0	0	1	2	2	1	2	0	0	0	0	0	0	0	0	0	0	0	0	0	0	0	0	0	0	0	0	0	0	0	0	0	0	0	0	0	0	0	0	0	0	0	0	0	0	0	0
China_rumen344	0	0	0	1	0	1	0	1	0	0	1	0	0	0	0	0	0	0	0	0	0	0	0	0	0	0	0	0	0	0	0	0	0	0	0	0	0	0	0	0	1	0	0	0	0	0	0	0	0
China_rumen345	0	0	0	1	0	1	0	0	0	0	1	0	0	0	0	0	0	0	0	0	0	0	0	0	1	0	0	0	0	0	0	0	0	0	0	0	0	0	0	0	1	0	0	0	0	0	0	0	0
China_rumen346	1	2	0	0	0	2	0	0	0	0	1	0	1	0	0	0	0	0	0	0	0	0	0	0	0	0	0	0	0	0	0	0	0	0	0	0	0	0	0	0	2	0	0	0	0	0	0	0	0
China_rumen347	0	0	0	1	0	0	0	0	0	0	0	0	0	0	0	0	0	0	0	0	0	0	0	0	0	0	0	0	0	0	0	0	0	0	0	0	0	0	0	0	0	0	0	0	0	0	0	0	0
China_rumen348	0	1	0	0	0	1	0	0	0	0	0	0	0	0	1	0	0	0	0	0	0	0	0	0	0	0	0	0	0	0	0	0	0	0	0	0	0	0	0	0	1	0	0	0	0	0	0	0	0
China_rumen349	0	0	0	0	0	1	0	1	0	0	0	0	0	0	0	0	0	0	0	0	0	0	0	0	0	0	0	0	0	0	0	0	0	0	0	0	0	0	0	0	0	0	0	0	0	0	0	0	0
China_rumen35	0	0	0	0	0	1	0	1	0	0	0	0	0	0	0	1	0	0	0	0	0	0	0	0	0	0	0	0	0	0	0	0	0	0	0	0	0	0	0	0	2	0	0	0	0	0	0	0	0
China_rumen350	0	0	0	1	0	0	0	0	0	0	1	0	0	0	0	0	0	0	0	0	0	0	0	0	0	0	0	0	0	0	0	0	0	0	0	0	0	0	0	0	1	0	0	0	0	0	0	0	0
China_rumen351	0	0	0	0	0	1	0	0	0	0	1	0	0	0	0	0	0	0	0	0	0	0	0	0	0	0	0	0	0	0	0	0	0	0	0	0	0	0	0	0	1	0	0	0	0	0	0	0	0
China_rumen352	1	0	0	0	0	0	0	1	0	0	1	0	1	0	1	0	0	0	0	0	0	0	0	0	0	0	0	0	0	0	0	0	0	0	0	0	0	0	0	0	1	0	0	0	0	0	0	0	0
China_rumen353	0	0	0	0	0	0	0	1	0	0	0	0	1	0	1	0	0	0	0	0	0	0	0	0	0	0	0	0	0	0	0	0	0	0	0	0	0	0	0	0	0	0	0	0	0	0	0	0	0
China_rumen354	0	0	0	0	0	0	0	0	0	0	0	0	1	0	0	1	0	0	0	0	0	0	0	0	0	0	0	0	0	0	0	0	0	0	0	0	0	0	0	0	0	0	0	0	0	0	0	0	0
China_rumen355	0	0	0	0	0	0	0	0	0	0	0	0	0	0	1	0	0	0	0	0	0	0	0	0	0	0	0	0	0	0	0	0	0	0	0	0	0	0	0	0	0	0	0	0	0	0	0	0	0
China_rumen356	0	0	0	0	0	2	0	1	1	0	0	0	0	0	0	0	0	0	0	0	0	0	0	0	0	0	0	0	0	0	0	0	0	0	0	0	0	0	0	0	0	0	0	0	0	0	0	0	0
China_rumen357	0	0	0	0	0	0	0	1	0	0	1	0	0	0	0	0	0	0	0	0	0	0	0	0	0	0	0	0	0	0	0	0	0	0	0	0	0	0	0	0	1	0	0	0	0	0	0	0	0
China_rumen358	0	0	0	1	0	1	0	1	0	0	1	0	0	0	0	0	0	0	0	0	0	0	0	0	0	0	0	0	0	0	0	0	0	0	0	0	0	0	0	0	2	0	0	0	0	0	0	0	0
China_rumen359	0	0	0	0	0	0	0	1	0	0	0	0	0	0	0	0	0	0	0	0	0	0	0	0	0	0	0	0	0	0	0	0	0	0	0	0	0	0	0	0	0	0	0	0	0	0	0	0	0
China_rumen36	0	0	0	0	1	2	0	1	0	1	0	0	0	0	0	0	0	0	0	0	0	0	0	0	0	0	0	0	0	0	0	0	0	0	0	0	0	0	0	0	0	0	0	0	0	0	0	0	0
China_rumen360	0	0	0	0	0	0	0	1	0	0	1	0	0	0	0	0	0	0	0	0	0	0	0	0	0	0	0	0	0	0	0	0	0	0	0	0	0	0	0	0	1	0	0	0	0	0	0	0	0
China_rumen361	0	0	0	0	0	1	0	1	1	0	0	0	0	0	0	0	0	0	0	0	0	0	0	0	0	0	0	0	0	0	0	0	0	0	0	0	0	0	0	0	0	0	0	0	0	0	0	0	0
China_rumen362	0	0	0	0	1	1	0	1	0	0	0	0	0	0	0	0	0	0	0	0	0	0	0	0	0	0	0	0	0	0	0	0	0	0	0	0	0	0	0	0	0	0	0	0	0	0	0	0	0
China_rumen363	0	0	0	0	0	0	0	0	0	0	0	0	0	0	1	0	0	0	0	0	0	0	0	0	0	0	0	0	0	0	0	0	0	0	0	0	0	0	0	0	0	0	0	0	0	0	0	0	0
China_rumen364	0	0	1	0	0	1	1	1	0	0	0	0	1	0	0	0	1	0	0	0	0	0	0	0	0	0	0	0	0	0	0	0	0	0	0	0	0	0	0	0	0	0	0	0	0	0	1	0	0
China_rumen365	0	0	0	0	0	1	0	0	0	0	1	0	1	0	0	0	0	0	0	0	0	0	0	0	0	0	0	0	0	0	0	0	0	0	0	0	0	0	0	0	1	0	0	0	0	0	0	0	0
China_rumen366	0	0	0	0	0	0	0	0	0	0	1	0	0	0	0	0	0	0	0	0	0	0	0	0	0	0	0	0	0	0	0	0	0	0	0	0	0	0	0	0	0	0	0	0	0	0	0	0	0
China_rumen367	0	0	0	0	0	0	0	0	0	0	0	0	0	1	1	0	0	0	0	0	0	0	0	1	0	0	0	0	0	0	0	0	0	0	0	0	0	0	0	0	0	0	0	0	0	0	0	0	1
China_rumen368	0	0	0	0	0	1	0	1	0	0	0	0	1	0	1	0	0	0	0	0	0	0	0	0	0	0	0	0	0	0	0	0	0	0	0	0	0	0	0	0	0	0	0	0	0	0	0	0	0
China_rumen369	0	0	0	1	0	0	0	0	0	0	0	0	0	0	0	0	0	0	0	0	0	0	0	0	0	0	0	0	0	0	0	0	0	0	0	0	0	0	0	0	0	0	0	0	0	0	0	0	0
China_rumen370	0	0	0	0	1	2	0	1	1	0	0	0	0	0	0	0	0	0	0	0	0	0	0	0	0	0	0	0	0	0	0	0	0	0	0	0	0	0	0	0	0	0	0	0	0	0	0	0	0
China_rumen371	0	0	0	0	0	2	0	1	0	0	1	0	0	0	0	0	0	0	0	0	0	0	0	0	0	0	0	0	0	0	0	0	0	0	0	0	0	0	0	0	1	0	0	0	0	0	0	0	0
China_rumen372	0	0	0	0	0	1	1	1	1	0	0	0	0	0	0	0	0	0	0	0	0	0	0	0	0	0	0	0	0	0	0	0	0	0	0	0	0	0	0	0	0	0	0	0	0	0	0	0	0
China_rumen373	0	0	0	0	1	0	0	1	0	0	1	0	0	0	0	0	0	0	0	0	0	0	0	0	0	1	0	0	0	0	0	0	0	0	0	0	0	0	0	0	1	0	0	0	0	0	0	0	0
China_rumen374	0	0	0	0	0	1	1	2	0	0	1	0	1	0	0	0	1	0	0	0	0	0	0	0	0	0	0	0	0	0	0	0	0	0	0	0	0	0	0	0	1	0	0	0	0	0	0	0	0
China_rumen375	0	0	0	0	0	2	0	1	1	0	1	0	0	0	0	0	0	0	0	0	0	0	0	0	0	0	0	0	0	0	0	0	0	0	0	0	0	0	0	0	1	0	0	0	0	0	0	0	0
China_rumen376	0	0	0	0	0	2	0	3	2	1	0	0	0	0	0	0	0	0	0	0	0	0	0	0	0	0	0	0	0	0	0	0	0	0	0	0	0	0	0	0	0	0	0	0	0	0	0	0	0
China_rumen377	0	0	0	0	0	0	0	0	0	0	0	0	0	0	0	0	0	0	0	0	0	0	0	0	0	0	0	0	0	0	0	0	0	0	0	0	0	0	0	0	0	0	0	0	0	0	0	0	0
China_rumen378	0	1	0	0	0	1	0	1	0	0	1	0	0	0	0	0	0	0	0	0	0	0	0	0	0	0	0	0	0	0	0	0	0	0	0	0	0	0	0	0	1	0	0	0	0	0	0	0	0
China_rumen379	0	0	0	0	0	2	1	1	1	0	0	0	0	0	0	0	0	0	0	0	0	0	0	0	0	0	0	0	0	0	0	0	0	0	0	0	0	0	0	0	0	0	0	0	0	0	0	0	0
China_rumen38	0	0	0	1	0	1	0	0	0	0	0	0	0	0	0	0	0	0	0	0	0	0	0	0	0	0	0	0	0	0	0	0	0	0	0	0	0	0	0	0	0	0	0	0	0	0	0	0	0
China_rumen380	0	0	0	0	0	1	0	1	0	0	0	0	1	0	0	0	0	0	0	0	0	0	0	0	0	0	0	0	0	0	0	0	0	0	0	0	0	0	0	0	0	0	0	0	0	0	0	0	0
China_rumen382	0	0	0	0	0	1	0	0	0	0	0	0	0	0	0	0	0	0	0	0	0	0	0	0	0	0	0	0	0	0	0	0	0	0	0	0	0	0	0	0	0	0	0	0	0	0	0	0	0
China_rumen383	0	0	0	0	1	1	0	1	1	0	0	0	0	0	0	0	0	0	0	0	0	0	0	0	0	0	0	0	0	0	0	0	0	0	0	0	0	0	0	0	0	0	0	0	0	0	0	0	0
China_rumen384	0	0	0	0	0	1	0	1	0	0	1	0	1	0	0	0	0	0	0	0	0	0	0	0	0	0	0	0	0	0	0	0	0	0	0	0	0	0	0	0	1	0	0	0	0	0	0	0	0
China_rumen385	0	0	0	0	0	1	0	1	0	0	0	0	0	0	0	0	0	0	0	0	0	0	0	0	0	0	0	0	0	0	0	0	0	0	0	0	0	0	0	0	0	0	0	0	0	0	0	0	0
China_rumen386	0	0	0	0	1	1	0	1	0	0	0	0	0	0	0	0	0	0	0	0	0	0	0	0	0	0	0	0	0	0	0	0	0	0	0	0	0	0	0	0	0	0	0	0	0	0	0	0	0
China_rumen388	0	0	0	0	0	1	0	0	0	0	0	0	0	0	0	0	0	0	0	0	0	0	0	0	0	0	0	0	0	0	0	0	0	0	0	0	0	0	0	0	0	0	0	0	0	0	0	0	0
China_rumen389	1	1	0	1	0	1	1	2	0	0	0	0	0	0	0	0	0	0	0	0	0	0	0	0	0	1	0	0	0	0	0	0	0	0	0	0	0	0	0	0	0	0	0	0	1	1	0	0	0
China_rumen39	0	1	0	0	0	1	0	0	0	0	1	0	0	0	0	0	0	0	0	0	0	0	0	0	0	0	0	0	0	0	0	0	0	0	0	0	0	0	0	0	1	0	0	0	0	0	0	0	0
China_rumen390	0	0	0	0	0	1	0	1	0	0	1	0	0	0	0	0	0	0	0	0	0	0	0	0	0	0	0	0	0	0	0	0	0	0	0	0	0	0	0	0	1	0	0	0	0	0	0	0	0
China_rumen391	0	0	0	0	0	1	0	1	0	0	0	0	0	0	0	0	0	0	0	0	0	0	0	0	0	0	0	0	0	0	0	0	0	0	0	0	0	0	0	0	0	0	0	0	0	0	0	0	0
China_rumen392	0	0	0	0	0	0	0	1	0	0	0	0	0	0	0	0	0	0	0	0	0	0	0	0	0	0	0	0	0	0	0	0	0	0	0	0	0	0	0	0	0	0	0	0	0	0	0	0	0
China_rumen393	0	0	0	0	0	2	0	1	0	0	0	0	1	0	0	1	1	1	0	0	0	0	0	0	0	0	0	0	0	0	0	0	0	0	0	0	0	0	0	0	0	0	0	0	0	0	0	0	0
China_rumen394	0	0	0	0	0	1	0	0	0	1	0	0	0	0	0	0	0	0	0	0	0	0	0	0	0	0	0	0	0	0	0	0	0	0	0	0	0	0	0	0	0	0	0	0	0	0	0	0	0
[truncated: 5,955 more rows]
[truncated: 12 more columns]

## Sheet: query_id
Genome ID	Acetoacetyl-CoA reductase	Butyryl-CoA dehydrogenase	Crotonoyl-CoA reductase	Lactate dehydrogenase	Malate dehydrogenase	Glutamate synthase			Succinate dehydrogenase		Bifurcating hydrogenases		Fermentative hydrogenases			Sensory hydrogenases			Energy-converting hydrogenases										Methanogenic hydrogenases						Respiratory hydrogenases						Hydrogenase-associated diaphorases	Methanogenesis			Wood-Ljungdahl				Nitrate reduction
[truncated: 7,504 more rows]
[truncated: 12 more columns]

[truncated: 6 more sheets: electron transfer, hydrogen metabolism, methanogens, reductive acetogens, nitrate reducer, sulfate reducer]
