# Supplementary material for: Distinct microbial hydrogen and reductant disposal pathways explain interbreed variations in ruminant methane yield
Source: Research Square preprint supplement (doi:10.21203/rs.3.rs-2831003/v1), 2024-04-11
Supplement: Supplementary file 3 [file 2ef3f16d01182d13b2933e30.xlsx]

## Sheet: Sheet1
Compound_ID	Name	Formula	Molecular Weight	RT [min]	Class(English)	AVE_JS	AVE_HS	FC	log2FC	Pvalue	ROC	all_HS1	all_HS10	all_HS11	all_HS12	all_HS2	all_HS3	all_HS4	all_HS5	all_HS6	all_HS7	all_HS8	all_HS9	all_JS1	all_JS10	all_JS11	all_JS12	all_JS2	all_JS3	all_JS4	all_JS5	all_JS6	all_JS7	all_JS8	all_JS9
Com_1_neg	Glucuronic acid	C6H10O7	194.139	0.92	Pentose and glucuronate interconversions	1361400	1383530	1.01626	0.0232629	0.541373	0.5625	77860	1372000	2100000	2049000	656800	1463000	2049000	2230000	1973000	505200	687500	1439000	102200	405000	2215000	338700	74000	949900	1238000	774000	2489000	4341000	1950000	1460000
Com_2_neg	GMP	C10H14N5O8P	363.221	3.44	Purine metabolism	20057.4	19229.1	0.958702	-0.0608458	0.148885	0.694444	54460	3774	5034	8329	6730	10930	3002	2810	15930	14080	84050	21620	27200	22650	9029	17930	31260	40080	20190	19390	12600	10710	21410	8240
Com_3_neg	D-Gluconic acid	C6H12O7	196.155	0.92	pentose phosphate pathway	385208	1.42998e+06	3.71222	1.89228	0.0209082	0.791667	79220	421100	2970000	608100	4060000	640300	1970000	3630000	1039000	281500	485400	975100	164100	194900	557500	327900	113000	180300	419900	298800	532300	926800	545600	361400
Com_4_neg	D-Glucose 1-phosphate	C6H13O9P	260.136	0.99	glycolysis	410208	344057	0.838736	-0.253711	0.248757	0.625	353500	218900	86880	297300	303200	396800	263300	468200	656800	414000	324200	345600	430200	200400	373500	269800	406100	272600	550400	706700	608000	405700	316000	383100
Com_5_neg	Lactic acid	C3H6O3	90.078	1.56	glycolysis	280296	3.04551e+06	10.8653	3.44166	0.0467247	0.625	92870	44540	4201000	122800	11620000	115300	9312000	6906000	451800	53620	380200	3246000	153600	151200	288600	40040	15570	424700	716300	311800	484300	536900	171000	69540
Com_6_neg	Malate	C4H6O5	134.087	1.34	Tca Cycle	800258	829858	1.03699	0.0523993	0.627309	0.513889	430600	630600	1103000	672700	1012000	830200	807400	631500	1072000	662100	964200	1142000	411300	941900	766300	688600	334300	703400	676900	809900	577500	1167000	1167000	1359000
Com_7_neg	GTP	C10H16N5O14P3	523.18	1	Purine metabolism	2018.08	1816.29	0.900008	-0.15199	0.349368	0.583333	1758	2133	449.4	974.1	1922	2396	1590	1854	2335	2633	2264	1487	2900	1552	1965	1136	2558	1619	1945	2596	1650	1956	1674	2666
Com_8_neg	Isocitrate	C6H8O7	192.124	2.11	Tca Cycle	8430.68	12988.3	1.5406	0.623493	0.0147424	0.75	16531.1	11560	23090	17270	14160	9179	7962	12830	9839	11928.8	10390	11120	2339	4517	12700	14060	3622	2954	6754	2740	6105	24150	8362	12865.2
Com_9_neg	Succinic Acid	C4H6O4	118.088	2.36	Tca Cycle	2473750	2.13077e+06	0.861351	-0.215327	0.127512	0.652778	1200000	489100	3601000	1351000	1926000	693900	1338000	733200	3339000	1213000	4527000	5158000	2252000	2700000	2795000	1965000	2957000	3090000	3220000	3166000	2401000	1466000	1525000	2148000
Com_10_neg	Sedoheptulose 7-phosphate	C7H13BaO10P	425.473	1.03	pentose phosphate pathway	486942	285657	0.586634	-0.769467	0.0245519	0.736111	199600	71900	62360	121900	58520	257800	167900	108700	614700	288500	839900	636100	339600	678900	386300	262900	227100	1269000	596200	474600	519000	499700	459400	130600
Com_11_neg	Oxaloacetate	C4H4O5	132.072	0.65	Tca Cycle	29358.3	157045	5.34925	2.41934	0.000488548	0.909722	23100	224400	186800	125400	338200	169100	298700	361400	45820	34800	41610	35210	15730	21630	94090	21000	21860	14520	26310	19060	16580	30380	23800	47340
Com_12_neg	Phosphoenolpyruvic acid	C3H5O6P	168.042	1.02	glycolysis	32462.5	20627.2	0.635418	-0.654223	0.012664	0.770833	34160	12260	3616	8791	11990	23610	13190	13280	33580	30770	36010	26270	34860	29440	26480	25840	46180	44130	34720	42580	31380	26810	24030	23100
Com_13_neg	Fructose	C6H12O6	180.16	0.86	glycolysis	143872	184617	1.2832	0.35975	0.190706	0.673611	44600	196600	240500	172500	153900	251800	276000	253800	189300	161000	102500	172900	77060	89800	239700	77970	52170	56260	147200	145500	193400	251000	182900	213500
Com_14_neg	Malonicacid	C3H4O4	104.061	2.56	Pyrimidine metabolism	172256	157150	0.912305	-0.132412	0.948806	0.4375	102800	93706.4	138400	183800	87549.6	72280	94770	104900	217200	161900	270900	357600	60300	70160	167600	84120	137888	337900	127500	69210	442300	354900	125100	90100
Com_15_neg	D-Fructose 6-phosphate	C6H13O9P	260.136	1	pentose phosphate pathway	4.30383e+06	3.30922e+06	0.7689	-0.379132	0.122617	0.673611	2895000	1496000	583600	1898000	1419000	3194000	2447000	2353000	8291000	3628000	5194000	6312000	3482000	2772000	4428000	1747000	3168000	4138000	6030000	5715000	7414000	6562000	3949000	2241000
Com_16_neg	6-Phosphogluconic acid	C6H13O10P	276.135	1.15	pentose phosphate pathway	3089.46	3694.83	1.19595	0.258155	0.415359	0.555556	1783	3073	3247	3193	2797	1322	2216	1564	5336	3285	8934	7588	3561	1535	5536	716.6	4358	6903	3058	2488	2517	3858	1980	562.9
Com_17_neg	AMP	C10H14N5O7P	347.221	2.9	Purine metabolism	16680	12811.9	0.768101	-0.380633	0.040315	0.736111	25360	5140	7758	6668	5346	8914	3717	4630	20790	10640	39150	15630	16560	19890	14220	14450	22110	22150	15770	21270	13010	11470	16520	12740
Com_18_neg	cis-Aconitic acid	C6H6O6	174.108	5.61	Tca Cycle	11329.5	22354.8	1.97315	0.980497	0.0387196	0.736111	2447	38710	45360	60590	24490	13170	21860	31080	9024	6725	6949	7852	2542	8284	7277	4734	1130	2531	11080	3617	6497	50950	34370	2942
Com_19_neg	D-Glucose	C6H12O6	180.156	0.86	glycolysis	157550	189836	1.20492	0.268943	0.271754	0.673611	51130	256300	209700	240500	136600	207500	222900	194500	272300	160700	109700	216200	95280	99260	185300	86940	57820	72500	174700	147600	215800	333100	214900	207400
Com_20_neg	dTMP	C10H15N2O8P	322.056	4.65	Pyrimidine metabolism	324758	110214	0.339373	-1.55906	7.73143e-05	0.916667	254400	93520	46830	92500	83800	81710	51170	66140	136000	116600	176700	123200	419500	157200	162600	380800	773800	474900	207500	399400	394200	116000	197800	213400
Com_21_neg	Fumaric Acid	C4H4O4	116.072	2.91	Tca Cycle	37794.2	35524.2	0.939938	-0.0893628	0.434693	0.618056	21280	31320	54310	28990	34430	20720	31300	24970	42650	25620	63340	47360	26290	40010	37460	38050	29210	32850	37280	35450	27410	41230	52610	55680
Com_22_pos	Pantothenate	C9H17NO5	219.235	4.81	Pantothenate and CoA biosynthesis	3.03908e+06	2.90126e+06	0.954649	-0.0669575	0.631185	0.513889	1626000	3123000	3250000	2116000	972100	3732000	2548000	2313000	5175000	2781000	3573000	3606000	1892000	3406000	2835000	1866000	1932000	3627000	3142000	3546000	3546000	2466000	2725000	5486000
Com_23_neg	D-Fructose 1,6-bisphosphate	C6H14O12P2	340.116	1.4	Carbon metabolism	9861.63	6435.44	0.652574	-0.615787	0.106902	0.673611	5078	901.3	458.3	16971.7	13761.7	11280.1	1150	12664.2	4094	1677	6382	2807	5800	1375	13427.3	13162	11040	7570	3955	9512	2413	19732	17488.1	12865.2
Com_24_neg	Citric Acid	C6H8O7	192.124	2.11	Tca Cycle	10915.6	15328.3	1.40426	0.489812	0.0306276	0.715278	16531.1	11180	19080	17940	21990	11280.1	15980	20960	12530	11928.8	12940	11600	13079.2	4913	18390	12110	16933.8	6671	7258	2968	3120	25520	11520	8504
Com_25_neg	2-Deoxy-D-glucose 6-phosphate	C6H13O8P	244.136	1	pentose phosphate pathway	47451.7	34638.4	0.729973	-0.454086	0.0526257	0.6875	49970	14080	9711	10690	11660	30070	22250	26190	69310	56010	69150	46570	51440	48890	30610	26320	61970	65210	49890	80760	46990	37100	31380	38860
Com_26_neg	Ribose 5-phosphate	C5H11O8P	230.11	1.08	pentose phosphate pathway	11940500	5.30496e+06	0.444283	-1.17045	0.00278179	0.826389	8028000	1643000	800500	2203000	1152000	3099000	2454000	1875000	9872000	5944000	16810000	9779000	13630000	10460000	7420000	6162000	18940000	25870000	9854000	16160000	12610000	9088000	9077000	4015000
Com_27_neg	dGDP	C10H15N5O10P2	427.201	4.52	Purine metabolism	4675.51	13790.6	2.94955	1.56049	0.000372666	0.895833	2454	12005.1	16240.3	16971.7	13761.7	11280.1	10196.7	12664.2	15610.8	11928.8	27040.9	15333.4	8740	1983	1216	2593	17870	10090	1532	5528	2131	666.1	2405	1352
Com_28_neg	D-Erythrose 4-phosphate	C4H9O7P	200.084	0.97	pentose phosphate pathway	348617	240170	0.688923	-0.537586	0.0368538	0.763889	235800	99670	59830	125900	92840	222700	168700	143700	586800	276200	427300	442600	328100	289200	283600	163200	282500	518100	467300	470800	456600	464000	293400	166600
Com_29_neg	D-Ribulose 5-phosphate	C5H11O8P	230.11	1.02	pentose phosphate pathway	5047250	2.50344e+06	0.496001	-1.01158	0.00682561	0.791667	3650000	611500	310000	812100	464600	1356000	1204000	797100	4832000	2856000	8228000	4920000	5341000	4481000	3057000	2659000	7433000	12170000	4360000	5818000	5371000	4270000	4115000	1492000
Com_30_neg	Glucose 6-phosphate	C6H13O9P	260.136	0.98	pentose phosphate pathway	8.93417e+06	6813500	0.762634	-0.390937	0.104423	0.708333	6140000	3194000	1200000	4051000	2806000	6679000	4824000	4722000	18570000	7446000	10320000	11810000	7803000	5254000	9229000	3895000	6727000	8521000	12600000	12430000	13760000	13880000	8301000	4810000
