# Supplementary material for: Distinct microbial hydrogen and reductant disposal pathways explain interbreed variations in ruminant methane yield
Source: Research Square preprint supplement (doi:10.21203/rs.3.rs-2831003/v1), 2024-04-11
Supplement: Supplementary file 4 [file 339cc1b520b2bb72498aa94e.xlsx]

## Sheet: enzyme_results in metagenome
Enzymes	Average in Jersey	SEM in Jersey	Average in Holstein	SEM in Holstein	P	ADJ-P	Enriched in grups	Fold change
Methanogenic hydrogenases	1.08752	0.21959	0.40951	0.06458	0.0022	0.00387396	Jersey	2.65566
Methyl-CoM reductase	1.3517	0.2779	0.4652	0.0724	0.0007	0.0011375	Jersey	2.90563
Acetyl-CoA synthase	5.17528	0.27081	4.23004	0.65516	0.0327	0.0327	Jersey	1.22346
Respiratory hydrogenases	2.1606	0.1778	8.0914	1.2148	0.0001	0.000325	Holstein	3.74498
Nitrate reductase	41.5637	3.073	68.2095	4.4383	0.0003	0.000557143	Holstein	1.64108
Sulfate reductase	6.2513	1.018	9.7961	0.9878	0.0153	0.016575	Holstein	1.56705
Fumarate reductase	14.8018	1.27145	29.5468	5.87507	0.0022	0.00317778	Holstein	1.99616
Fermentative hydrogenases	32.8743	2.7749	20.9132	1.5411	0.0032	0.00378182	Jersey	1.57194
Oxaloacetate reductase	6.53647	0.82174	1.67139	0.15565	0.0001	0.000325	Jersey	3.9108
Glutamate synthase	75.9646	5.1247	233.432	35.2218	0.0001	0.000325	Holstein	3.07291
Lactate synthase	3.0654	0.5863	8.623	0.9979	0.0003	0.000557143	Holstein	2.81301
Acetoacetyl-CoA reductase	4.6271	0.575	9.4526	0.701	0.0003	0.000557143	Holstein	2.04288
Crotonyl-CoA reductase	2.4677	0.3069	21.3348	5.4853	0.0001	0.000325	Holstein	8.64562
Butyryl-CoA dehydrogenase-ACADS	4.06086	0.34052	6.67238	0.56534	0.0008	0.00198969	Holstein	1.6431

## Sheet: microorganisms_results in MG
Microorganisms	Average in Jersey	SEM in Jersey	Average in Holstein	SEM in Holstein	P	ADJ-P	Enriched in grups	Fold change	domain	phylum	class	order	family	genus	species
MAG399	1233.49	391.16	73.33	17.65	0.0001	0.0002	Jersey	16.8211	d__Archaea	p__Methanobacteriota	c__Methanobacteria	o__Methanobacteriales	f__Methanobacteriaceae	g__Methanobrevibacter_A	s__
MAG400	1380.53	164.73	365.14	65.62	0.0001	0.0002	Jersey	3.78082	d__Bacteria	p__Firmicutes_A	c__Clostridia	o__Oscillospirales	f__Acutalibacteraceae	g__RUG612	s__RUG612 sp900320605
MAG34	16.52	3.05	1663.68	413.92	0.0001	0.0002	Holstein	100.707	d__Bacteria	p__Firmicutes_C	c__Negativicutes	o__Selenomonadales	f__Selenomonadaceae	g__RUG114	s__RUG114 sp900315615
MAG89	2623.31	1333.56	54114.4	9252.97	0.0001	0.0002	Holstein	20.6283	d__Bacteria	p__Firmicutes_C	c__Negativicutes	o__Selenomonadales	f__Selenomonadaceae	g__Selenomonas_C	s__Selenomonas_C bovis
MAG178	153.55	23.85	568.09	92.76	0.0001	0.0002	Holstein	3.69971	d__Bacteria	p__Firmicutes_C	c__Negativicutes	o__Selenomonadales	f__Selenomonadaceae	g__Mitsuokella	s__Mitsuokella multacida
MAG41	19972.2	5642.73	2632.46	1384.48	0.0004	0.000666667	Jersey	7.58691	d__Bacteria	p__Firmicutes_A	c__Clostridia	o__Lachnospirales	f__Lachnospiraceae	g__CAG-603	s__CAG-603 sp900314525
MAG85	11937.1	2120.09	2976.23	1179.47	0.0007	0.001	Jersey	4.01082	d__Bacteria	p__Bacteroidota	c__Bacteroidia	o__Bacteroidales	f__Paludibacteraceae	g__RF16	s__RF16 sp900320865
MAG222	93.28	26.14	465.73	150.29	0.0079	0.00877778	Holstein	4.99282	d__Bacteria	p__Proteobacteria	c__Gammaproteobacteria	o__Enterobacterales	f__Succinivibrionaceae	g__Succinivibrio	s__Succinivibrio sp000431835
MAG60	837.73	126.74	7300.17	2854.2	0.4529	0.4529	Holstein	8.71423	d__Bacteria	p__Firmicutes_C	c__Negativicutes	o__Acidaminococcales	f__Acidaminococcaceae	g__Succiniclasticum	s__Succiniclasticum sp900315805
MAG344	232.27	82.59	1049.34	196.35	0.0032	0.004	Holstein	4.51776	d__Bacteria	p__Firmicutes_C	c__Negativicutes	o__Veillonellales	f__Megasphaeraceae	g__Megasphaera	s__Megasphaera elsdenii

## Sheet: enzyme_results in MT
Enzymes	Total_average	Average in Jersey	SEM in Jersey	Average in Holstein	SEM in Holstein
Methanogenic hydrogenases	47.7078	53.1526	8.3057	42.2629	8.0574
Methyl-CoM reductase	116.399	123.056	26.978	109.741	38.992
Acetyl-CoA synthase	6.52505	6.9975	1.2978	6.0526	1.9618
Respiratory hydrogenases	2.5114	2.7258	0.4968	2.297	0.7672
Nitrate reductase	73.3847	98.4626	15.0509	48.3069	11.852
Sulfate reductase	10.3725	10.2055	2.8605	10.5394	3.823
Fumarate reductase	240.541	235.761	24.4123	245.32	27.5734
Fermentative hydrogenases	12.6928	15.3979	2.2625	9.9878	0.68
Glutamate synthase	632.814	336.602	40.1794	929.027	135.385
Lactate synthase	10.1439	6.3808	0.7928	13.907	2.8168
Butyryl-CoA dehydrogenase	15.5798	19.7033	4.148	11.4562	1.727
Acetoacetyl-CoA reductase	64.6993	32.6309	7.592	96.7676	24.249
Crotonoyl-CoA reductase	38.1085	15.1313	2.786	61.0857	9.644
