# Supplementary material for: Distinct microbial hydrogen and reductant disposal pathways explain interbreed variations in ruminant methane yield
Source: Research Square preprint supplement (doi:10.21203/rs.3.rs-2831003/v1), 2024-04-11
Supplement: Supplementary file 5 [file 39539918f97054f81475bf0e.xlsx]

## Sheet: statistics in metagenome
Items	Holstein		Jersey		p	adj-p
	Average	SEM	Average	SEM
Total abundance	30630.8	987.08	24988.9	756.73	0.0004	0.0007
AA	682.152	17.051	480.831	11.525	<.0001	7e-05
CBM	4269.65	131.433	3692.16	89.281	0.0012	0.0012
CE	4350.04	156.629	3356.07	114.51	0.0002	0.000466667
GH	13523.9	484.792	11044.5	408.223	0.001	0.00116667
GT	6722.09	167.881	5435.37	141.341	0.0001	0.00035
PL	837.098	47.984	658.6	30.691	0.001	0.00116667

## Sheet: GH43 class
class	Jersey	Holstein
Bacteroidia	901.431	1308.72
Clostridia	85.5771	75.6421
Bacteria_norank	39.23	27.1886
Fibrobacteria	8.35734	9.57344
Spirochaetia	7.93054	10.0457
Chordata	4.21055	6.48273
Chitinophagia	3.41399	2.45895
Bacilli	3.03466	2.54903
Chytridiomycota	2.68984	0
Cytophagia	2.53109	1.30029
Verrucomicrobia_norank	1.98944	0
Sphingobacteriia	1.87144	1.55
Bacteroidetes_norank	1.67951	0
Flavobacteriia	1.43864	2.36762
Actinobacteria	1.40797	0
Gammaproteobacteria	1.27301	0
Firmicutes_norank	1.13805	0
Others	10.0592	10.1304

## Sheet: GH43 genus
genus	Jersey	Holstein
Prevotella	648.635	982.689
Prevotellaceae_norank	64.6063	107.175
Bacteroides	71.9194	101.918
Bacteroidales_norank	38.2915	42.1003
Bacteria_norank	39.2001	27.1753
Ruminococcus	15.2753	21.4939
Bacteroidaceae_norank	19.4373	21.3129
Paraprevotella	12.8884	15.3544
Lachnospiraceae_norank	9.25199	12.38
Treponema	7.38256	9.69239
Fibrobacter	8.35734	9.57344
Clostridiales_norank	14.7665	9.28791
Rikenellaceae_norank	14.1174	8.99588
Bovidae	4.21055	6.48273
Muribaculaceae_norank	6.1381	6.29332
Ruminococcaceae_norank	5.53285	5.25086
Eubacterium	1.51598	4.97003
Draconibacterium	1.75827	4.3959
Clostridium	2.42082	4.28257
Butyrivibrio	8.9085	4.23044
Roseburia	1.35353	2.78148
Alistipes	3.87001	2.51599
Porphyromonadaceae_norank	5.49043	2.37951
Muribaculum	3.13766	2.35446
Dysgonomonas	1.96522	2.17413
Flavobacterium	0	1.99122
Pseudobutyrivibrio	9.84714	1.9396
Mariniphaga	1.80466	1.86569
Niabella	1.99646	1.61515
Subdoligranulum	2.21776	1.52621
Parabacteroides	1.31225	1.39818
Paludibacter	0	1.36199
Prolixibacteraceae_norank	1.20198	1.27304
Paenibacillus	1.69622	1.21791
Blautia	2.06043	1.18913
Lachnoclostridium	6.26355	1.04244
Others	32.9357	24.3328
Neocallimastigaceae	2.68984	0
Verrucomicrobia_norank	1.98944	0
Bacteroidetes_norank	1.67951	0
Firmicutes_norank	1.13805	0

## Sheet: GH27 class
class	Jersey	Holstein
Bacteroidia	55.6687	69.8556
Clostridia	12.6657	10.7282
Streptophyta	11.9405	0
Discosea_norank	8.84074	0
Verrucomicrobia_norank	4.59853	1.64574
Oligohymenophorea	4.17839	0
Bigyra	3.77839	0
Cnidaria	1.92069	0
Filasterea	1.23124	0
Others	6.27419	5.01197
Spirochaetia	0	2.22339

## Sheet: GH27 genus
genus	Jersey	Holstein
Prevotella	35.72	54.8427
Prevotellaceae_norank	4.94655	4.29731
Bacteroides	4.76739	4.19701
Bacteroidales_norank	3.70966	2.7871
Treponema	0	2.22339
Clostridiales_norank	2.87557	1.94943
Lachnospiraceae_norank	2.01872	1.75394
Verrucomicrobia_norank	4.59853	1.64574
Ruminococcus	1.41721	1.58575
Ruminococcaceae_norank	1.76711	1.41738
Rikenellaceae_norank	1.91814	1.23041
Butyrivibrio	0	1.14593
Clostridium	0	1.07064
Others	17.7547	9.31822
Acanthamoeba	8.84074	0
Tetrahymena	4.17839	0
Blastocystis	3.23665	0
Asteraceae	2.69639	0
Malvaceae	1.99018	0
Nephtheidae	1.92069	0
Poaceae	1.84593	0
Parabacteroides	1.54714	0
Capsaspora	1.23124	0
Prolixibacter	1.07331	0
Salicaceae	1.04277	0

## Sheet: statistics in metatranscriptome
Items	Holstein		Jersey		p	adj-p
	Average	SEM	Average	SEM
AA	310.775	34.068	182.257	9.303	0.0056	0.0167509
CBM	5888.06	592.723	4989.18	169.711	0.4529	0.543504
CE	1744.27	83.076	1974.89	94.477	0.0496	0.0744708
GH	8662.41	323.94	9996.88	419.597	0.0282	0.0564807
GT	4487.06	163.017	4464.49	189.659	1	1
PL	407.934	28.404	641.455	48.607	0.0007	0.00395002
