# Supplementary material for: Distinct microbial hydrogen and reductant disposal pathways explain interbreed variations in ruminant methane yield
Source: Research Square preprint supplement (doi:10.21203/rs.3.rs-2831003/v1), 2024-04-11
Supplement: Supplementary file 7 [file 5cbd0d7975484c59aed1cb95.xlsx]

## Sheet: level2 in metagenome
KEGG_level2	Jersey			Holstein			P	Adjust-P
	Average relative abundance	Standard error of the mean	Standard deviation	Average relative abundance	Standard error of the mean	Standard deviation
1.0 Global and overview maps	18225.9	997.9	3456.9	38526	3737.6	12947.6	9.89197e-05	0.000212485
1.1 Carbohydrate metabolism	6288.5	324.8	1125.3	11808.6	962.8	3335.2	0.000124836	0.000229698
1.10 Biosynthesis of other secondary metabolites	1244.2	69.1	239.5	3042	329.3	1140.7	9.89197e-05	0.000212485
1.11 Xenobiotics biodegradation and metabolism	922.3	44.3	153.6	1840.3	142.5	493.8	0.000105954	0.000212485
1.2 Energy metabolism	3509.5	175.1	606.7	7068.3	609.7	2112.2	9.89197e-05	0.000212485
1.3 Lipid metabolism	1301.8	75.1	260.2	2632.2	302.4	1047.6	0.000219974	0.000348925
1.4 Nucleotide metabolism	2647.9	142.9	495.1	5494.7	507	1756.3	0.000106243	0.000212485
1.5 Amino acid metabolism	4315.4	237.3	822.1	9661.9	1023.8	3546.4	9.89197e-05	0.000212485
1.6 Metabolism of other amino acids	1401.7	74.4	257.7	2786.2	250.3	867	0.000106243	0.000212485
1.7 Glycan biosynthesis and metabolism	1646.4	104.7	362.7	3667.9	416.4	1442.5	0.00015282	0.000270374
1.8 Metabolism of cofactors and vitamins	3677.5	241.4	836.3	8538.9	873.3	3025.3	9.89197e-05	0.000212485
1.9 Metabolism of terpenoids and polyketides	717.2	43.5	150.7	1570.9	155.9	540.1	9.89197e-05	0.000212485
2.1 Transcription	601.7	43.5	150.7	528.8	34.9	120.9	0.186083	0.208776
2.2 Translation	9183.9	445.1	1542	15521.9	1200.2	4157.6	0.000186761	0.000318186
2.3 Folding, sorting and degradation	2716.7	136.2	471.7	4177.5	359.2	1244.2	0.000976887	0.00144957
2.4 Replication and repair	2823.5	166.4	576.5	5187.4	429.1	1486.3	0.000124836	0.000229698
3.1 Membrane transport	1506.3	88.2	305.6	4260.4	626.5	2170.3	0.000105954	0.000212485
3.2 Signal transduction	2761.8	151	522.9	4380.8	476.9	1652.2	0.00165638	0.00224099
3.3 Signaling molecules and interaction	7.9	1	3.5	12.8	1.5	5.4	0.0211439	0.0249389
4.1 Transport and catabolism	1388.1	135	467.7	561	33.8	117	0.000106243	0.000212485
4.2 Cell growth and death	2172.8	132.4	458.5	2031	120.2	416.3	0.28505	0.298007
4.3 Cellular community - eukaryotes	341.8	41.7	144.6	25.3	8.3	28.7	9.89197e-05	0.000212485
4.4 Cellular community - prokaryotes	1633.7	91.7	317.8	4229.6	578.7	2004.7	0.000106243	0.000212485
4.5 Cell motility	348.2	30	103.9	1568.9	365.1	1264.7	0.000815742	0.0012508
5.1 Immune system	783.3	68.1	236	676	76.3	264.4	0.201753	0.220968
5.10 Environmental adaptation	695	57.1	197.7	664	85.4	295.8	0.395065	0.403844
5.2 Endocrine system	1219.2	82.1	284.4	906.5	40.4	140	0.00957743	0.0115937
5.3 Circulatory system	213.7	25.7	89	16.8	5.4	18.8	9.89197e-05	0.000212485
5.4 Digestive system	164.6	14.4	50	150.3	21.5	74.4	0.241067	0.257886
5.5 Excretory system	277.8	32.4	112.4	40.8	9.4	32.4	0.000105954	0.000212485
5.6 Nervous system	625.6	57.2	198.2	285	16.1	55.8	0.000106243	0.000212485
5.7 Sensory system	140.2	17.1	59.2	11.1	3.6	12.6	9.89197e-05	0.000212485
5.8 Development and regeneration	84.9	11.7	40.6	12	2.1	7.3	9.89197e-05	0.000212485
5.9 Aging	497.7	27.9	96.5	626.1	35.1	121.6	0.00850582	0.0108685
6.1 Cancer: overview	1089.7	101.7	352.4	598.1	34.6	119.9	0.00139211	0.00194051
6.10 Infectious disease: parasitic	201.7	23.7	82.2	24.1	4.5	15.6	9.89197e-05	0.000212485
6.11 Drug resistance: antimicrobial	721.3	40.4	140	1660.9	178.8	619.2	9.89197e-05	0.000212485
6.12 Drug resistance: antineoplastic	528.2	31.5	109.1	788.8	59.3	205.4	0.00139211	0.00194051
6.2 Cancer: specific types	318.3	26.2	90.6	167.8	6.8	23.6	0.000219974	0.000348925
6.3 Immune disease	660.7	78	270.1	178.3	13	45.1	9.89197e-05	0.000212485
6.4 Neurodegenerative disease	773.2	47	162.8	610.8	19	65.7	0.00957743	0.0115937
6.5 Substance dependence	578.9	76.8	266.1	47.4	15	51.8	9.89197e-05	0.000212485
6.6 Cardiovascular disease	383	19.2	66.4	553.1	39.4	136.4	0.00196639	0.00258439
6.7 Endocrine and metabolic disease	539.2	32	110.7	549.7	27.6	95.7	0.729034	0.729034
6.8 Infectious disease: bacterial	1992.4	151.2	523.9	1627.2	134.9	467.2	0.043317	0.0498145
6.9 Infectious disease: viral	936.7	108.4	375.5	175.2	17.9	61.9	9.89197e-05	0.000212485

## Sheet: level3 in metagenome
KEGG_level2	KEGG_level3	Jersey			Holstein			P	Adjust-P
		Average relative abundance	Standard error of the mean	Standard deviation	Average relative abundance	Standard error of the mean	Standard deviation
1.0 Global and overview maps	2-Oxocarboxylic acid metabolism	1301	185.37	642.141	453.08	28.21	97.715	<.0001	9.55496e-05
3.1 Membrane transport	ABC transporters	2057.98	367.4	1272.71	617.79	36.76	127.333	<.0001	0.000114311
1.10 Biosynthesis of other secondary metabolites	Acarbose and validamycin biosynthesis	167.83	18.41	63.772	59.65	4.24	14.703	<.0001	0.000100008
6.2 Cancer: specific types	Acute myeloid leukemia	0.53	0.21	0.71	5.9	0.69	2.384	<.0001	9.55496e-05
4.3 Cellular community - eukaryotes	Adherens junction	2.43	0.93	3.239	40.52	4.94	17.115	<.0001	8.85947e-05
5.2 Endocrine system	Adipocytokine signaling pathway	77.16	7.66	26.552	84.71	6.42	22.243	0.2727	0.293912
5.3 Circulatory system	Adrenergic signaling in cardiomyocytes	16.28	5.47	18.953	213.21	25.69	88.999	<.0001	8.85947e-05
6.10 Infectious disease: parasitic	African trypanosomiasis	6.46	0.5	1.721	11.49	1.43	4.939	0.0032	0.00414441
1.5 Amino acid metabolism	Alanine, aspartate and glutamate metabolism	1841.69	191.09	661.946	867.58	49.1	170.08	<.0001	0.000100008
6.5 Substance dependence	Alcoholism	46.7	14.67	50.82	567.53	75.42	261.275	<.0001	8.85947e-05
5.2 Endocrine system	Aldosterone synthesis and secretion	4.32	1.56	5.403	49.32	5.64	19.528	<.0001	8.85947e-05
5.5 Excretory system	Aldosterone-regulated sodium reabsorption	0.02	0.01	0.034	0.17	0.05	0.167	0.0002	0.000339363
6.3 Immune disease	Allograft rejection	0.29	0.05	0.185	0.3	0.05	0.157	0.6861	0.698296
1.3 Lipid metabolism	alpha-Linolenic acid metabolism	3.25	0.49	1.702	3.21	0.5	1.734	0.7728	0.780617
6.4 Neurodegenerative disease	Alzheimer disease	179	6.08	21.063	170.7	7.9	27.363	0.3865	0.407834
1.1 Carbohydrate metabolism	Amino sugar and nucleotide sugar metabolism	2670.57	265.61	920.084	1314.91	75.2	260.513	<.0001	0.000134775
2.2 Translation	Aminoacyl-tRNA biosynthesis	2353.42	184.28	638.348	1421.22	83.08	287.794	0.0002	0.000258781
1.11 Xenobiotics biodegradation and metabolism	Aminobenzoate degradation	35.62	2.5	8.661	26.04	2.24	7.752	0.0094	0.0116386
6.10 Infectious disease: parasitic	Amoebiasis	5.75	0.76	2.642	3.94	0.47	1.614	0.0243	0.0290527
6.5 Substance dependence	Amphetamine addiction	11.79	3.93	13.612	151.48	18.56	64.3	<.0001	8.85947e-05
3.2 Signal transduction	AMPK signaling pathway	66.65	3.27	11.319	142.48	12.57	43.547	<.0001	0.000134775
6.4 Neurodegenerative disease	Amyotrophic lateral sclerosis (ALS)	252.28	12.39	42.914	164.27	6.23	21.567	<.0001	0.000100008
6.12 Drug resistance: antineoplastic	Antifolate resistance	752.66	54.86	190.042	395.78	28.02	97.06	<.0001	0.000114311
5.1 Immune system	Antigen processing and presentation	147.69	6.28	21.755	193.5	13.1	45.373	0.0153	0.0186086
3.2 Signal transduction	Apelin signaling pathway	9.21	3.05	10.552	108.72	12.21	42.309	<.0001	8.85947e-05
4.2 Cell growth and death	Apoptosis	127.82	8.04	27.838	167.1	13.74	47.607	0.0433	0.0504842
4.2 Cell growth and death	Apoptosis - fly	21.29	1.87	6.462	35.92	3.62	12.554	0.0022	0.00292003
4.2 Cell growth and death	Apoptosis - multiple species	0.53	0.21	0.729	7.46	0.82	2.831	<.0001	8.85947e-05
1.7 Glycan biosynthesis and metabolism	Arabinogalactan biosynthesis - Mycobacterium	45.34	5.64	19.55	16.41	1.26	4.348	<.0001	0.000100008
1.3 Lipid metabolism	Arachidonic acid metabolism	251.95	12.5	43.315	153.82	6.2	21.484	<.0001	0.000100008
1.5 Amino acid metabolism	Arginine and proline metabolism	695.93	100.94	349.68	257.69	15.86	54.932	<.0001	0.000100008
1.5 Amino acid metabolism	Arginine biosynthesis	1062.61	130.53	452.174	481.29	26.06	90.285	<.0001	0.000100008
1.1 Carbohydrate metabolism	Ascorbate and aldarate metabolism	170.71	9.95	34.464	108.46	5.94	20.563	0.0001	0.000167778
6.3 Immune disease	Asthma	0.29	0.05	0.186	0.19	0.03	0.096	0.1489	0.164958
1.11 Xenobiotics biodegradation and metabolism	Atrazine degradation	114.61	32.87	113.863	0.69	0.14	0.495	<.0001	0.000100008
6.3 Immune disease	Autoimmune thyroid disease	0.29	0.05	0.185	0.3	0.05	0.157	0.6861	0.698296
4.1 Transport and catabolism	Autophagy - animal	10.39	3.73	12.904	144.87	16.52	57.223	<.0001	8.85947e-05
4.1 Transport and catabolism	Autophagy - other	6.37	2.5	8.655	90.33	10.19	35.313	<.0001	8.85947e-05
4.1 Transport and catabolism	Autophagy - yeast	15.01	5.42	18.768	200.32	23.43	81.162	<.0001	8.85947e-05
5.8 Development and regeneration	Axon guidance	1.61	0.69	2.395	25.45	4.77	16.514	<.0001	8.85947e-05
5.8 Development and regeneration	Axon regeneration	4.02	1.32	4.564	51.31	6.37	22.075	<.0001	8.85947e-05
5.1 Immune system	B cell receptor signaling pathway	1.11	0.34	1.183	11.57	1.57	5.445	<.0001	8.85947e-05
4.5 Cell motility	Bacterial chemotaxis	622.58	130.15	450.859	96.05	10.4	36.043	<.0001	0.000100008
6.8 Infectious disease: bacterial	Bacterial invasion of epithelial cells	4.84	1.75	6.066	63.95	7.64	26.461	<.0001	8.85947e-05
3.1 Membrane transport	Bacterial secretion system	2058.84	238.6	826.52	839.08	54.88	190.103	<.0001	0.000100008
6.2 Cancer: specific types	Basal cell carcinoma	0.08	0.03	0.09	1.18	0.13	0.453	<.0001	8.85947e-05
2.1 Transcription	Basal transcription factors	8.37	2.31	7.991	55.2	6.16	21.332	<.0001	0.000100008
2.4 Replication and repair	Base excision repair	903.85	95.76	331.731	523.05	31.75	109.973	0.0003	0.000491129
1.11 Xenobiotics biodegradation and metabolism	Benzoate degradation	434.55	19.66	68.121	255.92	13.15	45.554	<.0001	8.85947e-05
1.6 Metabolism of other amino acids	beta-Alanine metabolism	262.79	26.05	90.247	85.41	8.05	27.89	<.0001	9.55496e-05
6.11 Drug resistance: antimicrobial	beta-Lactam resistance	532.8	54.1	187.404	217.88	11.28	39.07	<.0001	8.85947e-05
1.10 Biosynthesis of other secondary metabolites	Betalain biosynthesis	1.06	0.23	0.792	0.34	0.06	0.207	0.001	0.00135754
5.4 Digestive system	Bile secretion	1.64	0.51	1.776	26.72	3.92	13.594	<.0001	8.85947e-05
4.4 Cellular community - prokaryotes	Biofilm formation - Escherichia coli	934.69	111.12	384.945	408.08	22.35	77.426	<.0001	9.55496e-05
4.4 Cellular community - prokaryotes	Biofilm formation - Pseudomonas aeruginosa	594.72	146.37	507.04	64.3	4.94	17.1	<.0001	9.55496e-05
4.4 Cellular community - prokaryotes	Biofilm formation - Vibrio cholerae	1435.36	294.59	1020.47	323.04	21.87	75.743	<.0001	0.000100008
1.0 Global and overview maps	Biosynthesis of amino acids	7829.59	816.47	2828.33	3564.37	200.37	694.108	<.0001	8.85947e-05
1.9 Metabolism of terpenoids and polyketides	Biosynthesis of ansamycins	149.16	13.21	45.752	72.27	4.16	14.409	<.0001	8.85947e-05
1.0 Global and overview maps	Biosynthesis of antibiotics	12255.4	1220.35	4227.42	5612.05	317.03	1098.23	<.0001	8.85947e-05
1.0 Global and overview maps	Biosynthesis of secondary metabolites	17764.8	1799.82	6234.75	8147.64	452.31	1566.84	<.0001	8.85947e-05
1.9 Metabolism of terpenoids and polyketides	Biosynthesis of siderophore group nonribosomal peptides	0.72	0.16	0.57	0.52	0.19	0.642	0.2135	0.233275
1.3 Lipid metabolism	Biosynthesis of unsaturated fatty acids	34.06	9.45	32.719	5.84	0.61	2.125	0.0209	0.0250432
1.9 Metabolism of terpenoids and polyketides	Biosynthesis of vancomycin group antibiotics	67.16	9.62	33.311	16.72	1.58	5.487	<.0001	0.000100008
1.10 Biosynthesis of other secondary metabolites	Biosynthesis of various secondary metabolites - part 2	828.2	106.29	368.201	324.8	24.88	86.19	<.0001	0.000134775
1.10 Biosynthesis of other secondary metabolites	Biosynthesis of various secondary metabolites - part 3	2.24	0.32	1.102	2.74	0.27	0.943	0.0647	0.0745211
1.8 Metabolism of cofactors and vitamins	Biotin metabolism	596.97	106.5	368.919	166.91	14.96	51.814	<.0001	0.000114311
6.2 Cancer: specific types	Breast cancer	0.91	0.36	1.233	12.06	1.31	4.541	<.0001	8.85947e-05
1.1 Carbohydrate metabolism	Butanoate metabolism	1232.53	94.72	328.109	575.44	30.1	104.26	<.0001	8.85947e-05
1.1 Carbohydrate metabolism	C5-Branched dibasic acid metabolism	489.87	64.91	224.846	162.83	10.04	34.766	<.0001	9.55496e-05
1.10 Biosynthesis of other secondary metabolites	Caffeine metabolism	0	0	0	0.02	0.02	0.068	0.3173	0.340218
3.2 Signal transduction	Calcium signaling pathway	5.39	1.88	6.53	59.98	7.09	24.546	<.0001	8.85947e-05
3.2 Signal transduction	cAMP signaling pathway	13.62	4.54	15.71	180.31	21.77	75.403	<.0001	8.85947e-05
1.11 Xenobiotics biodegradation and metabolism	Caprolactam degradation	9.07	0.9	3.116	4.98	0.47	1.627	0.0004	0.000603003
1.10 Biosynthesis of other secondary metabolites	Carbapenem biosynthesis	99.96	19.44	67.328	23.85	2.24	7.752	<.0001	0.000100008
5.4 Digestive system	Carbohydrate digestion and absorption	95.22	19.33	66.966	45.34	3.05	10.563	0.0056	0.00704098
1.2 Energy metabolism	Carbon fixation in photosynthetic organisms	1433.03	71.15	246.468	894.54	45.73	158.423	<.0001	0.000134775
1.2 Energy metabolism	Carbon fixation pathways in prokaryotes	2067.06	191.18	662.283	930.55	46.22	160.111	<.0001	8.85947e-05
1.0 Global and overview maps	Carbon metabolism	5359.78	440.29	1525.21	2756.3	136.82	473.955	<.0001	8.85947e-05
5.3 Circulatory system	Cardiac muscle contraction	0.51	0.2	0.685	0.52	0.3	1.035	0.3864	0.407834
1.9 Metabolism of terpenoids and polyketides	Carotenoid biosynthesis	1.66	0.57	1.962	1.1	0.2	0.679	0.6861	0.698296
6.11 Drug resistance: antimicrobial	Cationic antimicrobial peptide (CAMP) resistance	553.01	77.61	268.837	192.43	12.06	41.767	<.0001	9.55496e-05
4.2 Cell growth and death	Cell cycle	18.67	6.33	21.915	230.15	28.26	97.906	<.0001	8.85947e-05
4.2 Cell growth and death	Cell cycle - Caulobacter	1185.53	86.62	300.071	642.17	44.55	154.316	<.0001	0.000134775
4.2 Cell growth and death	Cell cycle - yeast	17.97	6.35	21.994	235.39	29.53	102.304	<.0001	8.85947e-05
4.2 Cell growth and death	Cellular senescence	16.87	6.11	21.156	220.05	25.86	89.592	<.0001	8.85947e-05
6.1 Cancer: overview	Central carbon metabolism in cancer	161.98	8.73	30.229	131.36	6.93	23.998	0.013	0.0160431
3.2 Signal transduction	cGMP-PKG signaling pathway	11.98	3.97	13.74	152.28	18.66	64.654	<.0001	8.85947e-05
6.10 Infectious disease: parasitic	Chagas disease (American trypanosomiasis)	1.96	0.73	2.519	31	3.82	13.234	<.0001	8.85947e-05
6.1 Cancer: overview	Chemical carcinogenesis	1.27	0.37	1.265	13.8	1.7	5.895	<.0001	8.85947e-05
1.11 Xenobiotics biodegradation and metabolism	Chloroalkane and chloroalkene degradation	16.62	1.75	6.053	6.57	0.8	2.779	0.0002	0.000258781
1.11 Xenobiotics biodegradation and metabolism	Chlorocyclohexane and chlorobenzene degradation	1.86	0.36	1.26	1.05	0.11	0.397	0.0941	0.10686
5.4 Digestive system	Cholesterol metabolism	13.85	1.49	5.173	22.95	2.04	7.064	0.0015	0.00199987
6.1 Cancer: overview	Choline metabolism in cancer	4.93	1.56	5.416	60.52	7.45	25.806	<.0001	8.85947e-05
6.2 Cancer: specific types	Chronic myeloid leukemia	0.08	0.03	0.09	1.18	0.13	0.453	<.0001	8.85947e-05
5.10 Environmental adaptation	Circadian entrainment	4.36	1.56	5.411	49.59	5.64	19.53	<.0001	8.85947e-05
5.10 Environmental adaptation	Circadian rhythm	7.62	2.87	9.951	102.18	13.39	46.394	<.0001	8.85947e-05
5.10 Environmental adaptation	Circadian rhythm - fly	0.05	0.04	0.141	0.71	0.19	0.652	<.0001	0.000141105
5.10 Environmental adaptation	Circadian rhythm - plant	2.24	0.83	2.862	36.59	4.67	16.163	<.0001	8.85947e-05
1.1 Carbohydrate metabolism	Citrate cycle (TCA cycle)	1431.79	131.23	454.593	615.61	31.11	107.782	<.0001	8.85947e-05
5.5 Excretory system	Collecting duct acid secretion	11.34	4.13	14.324	147.03	18.34	63.515	<.0001	8.85947e-05
6.2 Cancer: specific types	Colorectal cancer	0.67	0.26	0.9	8.24	0.93	3.204	<.0001	8.85947e-05
5.1 Immune system	C-type lectin receptor signaling pathway	4.96	1.79	6.2	56.53	6.53	22.632	<.0001	8.85947e-05
6.7 Endocrine and metabolic disease	Cushing syndrome	3.36	0.43	1.491	2.4	0.35	1.203	0.0377	0.0440363
1.3 Lipid metabolism	Cutin, suberine and wax biosynthesis	1.35	0.27	0.937	0.51	0.1	0.332	0.0032	0.00414441
1.6 Metabolism of other amino acids	Cyanoamino acid metabolism	642.34	44.81	155.209	372.13	18.19	62.996	<.0001	0.000100008
1.5 Amino acid metabolism	Cysteine and methionine metabolism	1972.05	211.9	734.058	904.17	50.02	173.264	<.0001	0.000100008
5.1 Immune system	Cytosolic DNA-sensing pathway	4.09	1.81	6.257	36.64	3.73	12.927	<.0001	0.000100008
1.6 Metabolism of other amino acids	D-Alanine metabolism	229.82	20.47	70.916	125.87	7.92	27.423	0.0003	0.000398834
1.6 Metabolism of other amino acids	D-Arginine and D-ornithine metabolism	4.34	0.61	2.117	5.11	0.59	2.053	0.119	0.133704
1.0 Global and overview maps	Degradation of aromatic compounds	191.66	11.22	38.871	117.99	7.08	24.539	0.0001	0.000209062
1.6 Metabolism of other amino acids	D-Glutamine and D-glutamate metabolism	241.44	31.1	107.725	100.85	6.64	23.018	<.0001	0.000114311
6.6 Cardiovascular disease	Dilated cardiomyopathy (DCM)	0.29	0.05	0.186	0.19	0.03	0.096	0.1489	0.164958
1.11 Xenobiotics biodegradation and metabolism	Dioxin degradation	23.78	2.45	8.48	14.41	1.09	3.769	0.0022	0.00292003
2.4 Replication and repair	DNA replication	1948.46	121.18	419.779	1194.87	58.83	203.796	<.0001	0.000114311
5.6 Nervous system	Dopaminergic synapse	16.9	5.68	19.661	225.99	27.28	94.485	<.0001	8.85947e-05
5.8 Development and regeneration	Dorso-ventral axis formation	0.56	0.2	0.689	7.86	1	3.477	<.0001	8.85947e-05
1.11 Xenobiotics biodegradation and metabolism	Drug metabolism - cytochrome P450	1.3	0.37	1.279	13.8	1.7	5.895	<.0001	8.85947e-05
1.11 Xenobiotics biodegradation and metabolism	Drug metabolism - other enzymes	1139.79	90.36	313.01	594.78	28.31	98.08	<.0001	0.000114311
6.12 Drug resistance: antineoplastic	EGFR tyrosine kinase inhibitor resistance	8.79	3.08	10.659	101.62	11.96	41.423	<.0001	9.55496e-05
5.5 Excretory system	Endocrine and other factor-regulated calcium reabsorption	0.76	0.25	0.87	12.99	1.73	5.991	<.0001	8.85947e-05
6.12 Drug resistance: antineoplastic	Endocrine resistance	0.53	0.21	0.71	5.9	0.69	2.384	<.0001	9.55496e-05
4.1 Transport and catabolism	Endocytosis	22.41	8.11	28.087	327.95	39.77	137.771	<.0001	8.85947e-05
6.2 Cancer: specific types	Endometrial cancer	0.4	0.16	0.561	6.33	0.69	2.397	<.0001	8.85947e-05
6.8 Infectious disease: bacterial	Epithelial cell signaling in Helicobacter pylori infection	282.31	22.47	77.831	308.4	21.56	74.675	0.2482	0.268284
6.9 Infectious disease: viral	Epstein-Barr virus infection	7.08	2.06	7.14	89.96	11.11	38.496	<.0001	8.85947e-05
3.2 Signal transduction	ErbB signaling pathway	0.53	0.21	0.71	5.9	0.69	2.384	<.0001	9.55496e-05
5.2 Endocrine system	Estrogen signaling pathway	147.06	6.52	22.579	185.6	11.47	39.736	0.0179	0.0215223
1.3 Lipid metabolism	Ether lipid metabolism	7.45	1.2	4.157	50.35	5.87	20.322	<.0001	8.85947e-05
2.4 Replication and repair	Fanconi anemia pathway	2.39	1.06	3.663	30.43	3.68	12.733	<.0001	9.55496e-05
1.3 Lipid metabolism	Fatty acid biosynthesis	758.44	117.62	407.432	267.63	21.48	74.426	<.0001	0.000134775
1.3 Lipid metabolism	Fatty acid degradation	107.88	9.59	33.206	82.88	5.69	19.718	0.0282	0.0334053
1.3 Lipid metabolism	Fatty acid elongation	1.4	0.53	1.84	15.39	1.71	5.938	<.0001	9.55496e-05
1.0 Global and overview maps	Fatty acid metabolism	795.22	118.82	411.613	306.38	22.98	79.611	0.0001	0.000167778
5.1 Immune system	Fc epsilon RI signaling pathway	0.3	0.06	0.191	0.37	0.05	0.18	0.4884	0.510045
5.1 Immune system	Fc gamma R-mediated phagocytosis	7.22	2.56	8.861	95.88	12.54	43.448	<.0001	8.85947e-05
4.2 Cell growth and death	Ferroptosis	97.14	9.8	33.936	92.83	5.83	20.205	0.9081	0.910343
4.5 Cell motility	Flagellar assembly	1099.68	270.19	935.981	103.69	9.04	31.314	<.0001	8.85947e-05
1.10 Biosynthesis of other secondary metabolites	Flavone and flavonol biosynthesis	14.43	1.15	3.97	9.54	0.9	3.104	0.0027	0.00350081
1.10 Biosynthesis of other secondary metabolites	Flavonoid biosynthesis	66.72	6.2	21.46	27.16	1.56	5.394	<.0001	8.85947e-05
6.6 Cardiovascular disease	Fluid shear stress and atherosclerosis	552.32	39.48	136.765	376.69	18.88	65.389	0.0008	0.00110768
1.11 Xenobiotics biodegradation and metabolism	Fluorobenzoate degradation	0.86	0.25	0.87	0.74	0.09	0.308	0.6442	0.662336
4.3 Cellular community - eukaryotes	Focal adhesion	7.29	2.33	8.077	100.16	12.71	44.044	<.0001	8.85947e-05
1.8 Metabolism of cofactors and vitamins	Folate biosynthesis	1449.28	141.12	488.839	593.52	40.81	141.382	<.0001	0.000100008
3.2 Signal transduction	FoxO signaling pathway	124.48	5.16	17.881	119.74	7.55	26.145	0.5254	0.547206
1.1 Carbohydrate metabolism	Fructose and mannose metabolism	1428.08	89.49	309.987	811.26	47.49	164.516	<.0001	0.000134775
1.11 Xenobiotics biodegradation and metabolism	Furfural degradation	0.03	0.01	0.02	0.05	0.01	0.048	0.4875	0.510045
5.6 Nervous system	GABAergic synapse	231.83	12.38	42.895	172.83	9.44	32.694	0.0022	0.00292003
1.1 Carbohydrate metabolism	Galactose metabolism	1051.47	105.72	366.24	524.21	31	107.383	<.0001	0.000134775
4.3 Cellular community - eukaryotes	Gap junction	7.39	2.34	8.117	99.49	14.36	49.73	<.0001	8.85947e-05
5.4 Digestive system	Gastric acid secretion	4.14	1.48	5.115	45.15	5.08	17.588	<.0001	8.85947e-05
6.2 Cancer: specific types	Gastric cancer	2.23	0.77	2.659	34.47	4.71	16.325	<.0001	8.85947e-05
1.9 Metabolism of terpenoids and polyketides	Geraniol degradation	1.52	0.3	1.033	0.95	0.12	0.4	0.204	0.223534
6.2 Cancer: specific types	Glioma	5.11	1.84	6.383	59.32	6.68	23.146	<.0001	8.85947e-05
5.2 Endocrine system	Glucagon signaling pathway	327.54	14.72	50.976	338.84	20.35	70.479	0.6442	0.662336
1.10 Biosynthesis of other secondary metabolites	Glucosinolate biosynthesis	160.15	23.23	80.475	61.21	4.55	15.769	<.0001	0.000114311
5.6 Nervous system	Glutamatergic synapse	233.76	12.2	42.265	201.37	11.05	38.291	0.0833	0.0948553
1.6 Metabolism of other amino acids	Glutathione metabolism	556.05	49.7	172.152	299.37	13.13	45.48	<.0001	9.55496e-05
1.3 Lipid metabolism	Glycerolipid metabolism	502.1	45.69	158.29	296.95	20.84	72.194	0.0005	0.000740744
1.3 Lipid metabolism	Glycerophospholipid metabolism	887.93	101.57	351.864	443.35	27.02	93.588	0.0003	0.000398834
1.5 Amino acid metabolism	Glycine, serine and threonine metabolism	1756.17	164.87	571.118	879.04	47.15	163.338	<.0001	8.85947e-05
1.1 Carbohydrate metabolism	Glycolysis / Gluconeogenesis	2230.56	138.87	481.056	1291.19	70.34	243.661	<.0001	0.000114311
1.7 Glycan biosynthesis and metabolism	Glycosaminoglycan degradation	190.54	12.58	43.57	140.63	7.38	25.569	0.0032	0.00414441
1.7 Glycan biosynthesis and metabolism	Glycosphingolipid biosynthesis - ganglio series	65.4	3.08	10.683	61.44	4.7	16.281	0.1489	0.164958
1.7 Glycan biosynthesis and metabolism	Glycosphingolipid biosynthesis - globo and isoglobo series	187.36	11.24	38.925	155.62	12.6	43.644	0.0282	0.0334053
1.7 Glycan biosynthesis and metabolism	Glycosylphosphatidylinositol (GPI)-anchor biosynthesis	1	0.46	1.605	12.73	1.55	5.374	<.0001	0.000100008
1.1 Carbohydrate metabolism	Glyoxylate and dicarboxylate metabolism	1332.95	116.31	402.915	655.01	32.2	111.561	<.0001	8.85947e-05
5.2 Endocrine system	GnRH signaling pathway	6.32	2.25	7.788	78.81	9	31.18	<.0001	8.85947e-05
6.3 Immune disease	Graft-versus-host disease	0	0	0.008	0.1	0.03	0.109	0.0006	0.00076325
5.2 Endocrine system	Growth hormone synthesis, secretion and action	0.75	0.3	1.022	10.34	1.34	4.639	<.0001	8.85947e-05
3.2 Signal transduction	Hedgehog signaling pathway - fly	7.34	2.7	9.361	98.94	13.29	46.054	<.0001	8.85947e-05
5.1 Immune system	Hematopoietic cell lineage	0.29	0.05	0.186	0.19	0.03	0.096	0.1489	0.164958
6.9 Infectious disease: viral	Hepatitis B	5.3	1.82	6.307	56.28	7.58	26.242	<.0001	0.000100008
6.9 Infectious disease: viral	Hepatitis C	23.45	5.35	18.538	61.52	7.61	26.366	0.0007	0.000907193
6.2 Cancer: specific types	Hepatocellular carcinoma	11.08	1.46	5.053	38.09	3.68	12.743	<.0001	8.85947e-05
6.9 Infectious disease: viral	Herpes simplex virus 1 infection	9.47	2.7	9.354	114.48	14.33	49.636	<.0001	8.85947e-05
3.2 Signal transduction	HIF-1 signaling pathway	513.79	21.89	75.828	430.54	21.34	73.925	0.0153	0.0186086
3.2 Signal transduction	Hippo signaling pathway	9.91	3.33	11.519	137.02	17.47	60.512	<.0001	8.85947e-05
3.2 Signal transduction	Hippo signaling pathway - fly	2.94	1.19	4.121	42.01	5.37	18.616	<.0001	8.85947e-05
3.2 Signal transduction	Hippo signaling pathway - multiple species	1.02	0.48	1.662	11.22	1.59	5.491	<.0001	0.000100008
1.5 Amino acid metabolism	Histidine metabolism	647.34	66.84	231.535	279.79	15.36	53.225	<.0001	8.85947e-05
2.4 Replication and repair	Homologous recombination	2491	185.41	642.286	1317.4	81.61	282.7	<.0001	0.000114311
6.9 Infectious disease: viral	Human cytomegalovirus infection	6.14	1.99	6.91	62.94	7.13	24.707	<.0001	8.85947e-05
6.9 Infectious disease: viral	Human immunodeficiency virus 1 infection	17.94	6.18	21.404	219.39	28.34	98.178	<.0001	8.85947e-05
6.9 Infectious disease: viral	Human papillomavirus infection	98.98	6.4	22.153	349.79	37.11	128.536	<.0001	8.85947e-05
6.9 Infectious disease: viral	Human T-cell leukemia virus 1 infection	19.79	2.44	8.468	93.44	10.38	35.949	<.0001	8.85947e-05
6.4 Neurodegenerative disease	Huntington disease	386.54	12.6	43.645	531.22	35.89	124.337	0.0027	0.00350081
6.6 Cardiovascular disease	Hypertrophic cardiomyopathy (HCM)	0.48	0.23	0.81	5.91	0.75	2.592	<.0001	9.55496e-05
5.1 Immune system	IL-17 signaling pathway	145.58	6.64	23.008	172.19	10.83	37.501	0.0647	0.0745211
5.7 Sensory system	Inflammatory mediator regulation of TRP channels	11.11	3.64	12.605	140.16	17.09	59.197	<.0001	8.85947e-05
6.9 Infectious disease: viral	Influenza A	22.41	5.55	19.234	40.31	5.2	18.005	0.0094	0.0116386
1.1 Carbohydrate metabolism	Inositol phosphate metabolism	229.03	12.6	43.639	194.13	10.57	36.616	0.0496	0.0575391
6.7 Endocrine and metabolic disease	Insulin resistance	312.42	16.82	58.269	351.56	23.37	80.953	0.1489	0.164958
5.2 Endocrine system	Insulin signaling pathway	232.44	10.61	36.766	465.88	38.24	132.452	<.0001	0.000134775
5.1 Immune system	Intestinal immune network for IgA production	0.41	0.08	0.276	0.27	0.03	0.118	0.1659	0.183219
1.10 Biosynthesis of other secondary metabolites	Isoquinoline alkaloid biosynthesis	68.3	11.14	38.595	24.36	1.8	6.24	<.0001	0.000114311
3.2 Signal transduction	Jak-STAT signaling pathway	0.53	0.21	0.71	5.9	0.69	2.384	<.0001	9.55496e-05
6.9 Infectious disease: viral	Kaposi sarcoma-associated herpesvirus infection	6.95	2.45	8.5	88.98	9.88	34.234	<.0001	8.85947e-05
6.8 Infectious disease: bacterial	Legionellosis	475.07	83.76	290.165	201.55	9.15	31.687	0.0002	0.000258781
6.10 Infectious disease: parasitic	Leishmaniasis	0.91	0.13	0.441	6.43	1.16	4.032	<.0001	8.85947e-05
1.9 Metabolism of terpenoids and polyketides	Limonene and pinene degradation	6.68	0.96	3.313	1.81	0.33	1.136	0.0004	0.000603003
1.3 Lipid metabolism	Linoleic acid metabolism	3.25	0.49	1.702	3.21	0.5	1.734	0.7728	0.780617
1.7 Glycan biosynthesis and metabolism	Lipoarabinomannan (LAM) biosynthesis	0.47	0.17	0.585	0.24	0.07	0.243	0.119	0.133704
1.8 Metabolism of cofactors and vitamins	Lipoic acid metabolism	15.07	1.25	4.325	5.91	0.33	1.156	0.0003	0.000398834
1.7 Glycan biosynthesis and metabolism	Lipopolysaccharide biosynthesis	1195.66	171.86	595.356	399.19	30.82	106.77	<.0001	8.85947e-05
5.9 Aging	Longevity regulating pathway	120.26	5.48	18.995	168.27	11.93	41.321	0.0032	0.00414441
5.9 Aging	Longevity regulating pathway - multiple species	173.56	9.99	34.599	110.16	5.41	18.731	<.0001	0.000114311
5.9 Aging	Longevity regulating pathway - worm	559.03	29.16	101.01	390.59	23.12	80.086	0.0008	0.00110768
5.6 Nervous system	Long-term depression	1.46	0.61	2.107	25.4	3.19	11.049	<.0001	8.85947e-05
5.6 Nervous system	Long-term potentiation	11.79	3.93	13.612	151.48	18.56	64.3	<.0001	8.85947e-05
1.5 Amino acid metabolism	Lysine biosynthesis	917.48	124.91	432.71	350.08	21.97	76.1	<.0001	0.000100008
1.5 Amino acid metabolism	Lysine degradation	188.15	20.03	69.383	90.16	6.27	21.721	<.0001	0.000134775
4.1 Transport and catabolism	Lysosome	223.11	16.78	58.114	449.5	41.32	143.124	0.0002	0.000324118
1.7 Glycan biosynthesis and metabolism	Mannose type O-glycan biosynthesis	4.01	0.46	1.605	4.25	0.42	1.461	0.5637	0.58259
3.2 Signal transduction	MAPK signaling pathway	1.23	0.5	1.737	19.29	2.42	8.395	<.0001	8.85947e-05
3.2 Signal transduction	MAPK signaling pathway - fly	116.56	5.1	17.67	139.99	10.36	35.904	0.0833	0.0948553
3.2 Signal transduction	MAPK signaling pathway - plant	116.9	19.5	67.558	103.41	9.82	34.012	0.8174	0.823522
3.2 Signal transduction	MAPK signaling pathway - yeast	0.66	0.1	0.343	2.29	0.34	1.161	<.0001	0.000100008
6.9 Infectious disease: viral	Measles	4.5	1.47	5.079	63.24	7.8	27.037	<.0001	8.85947e-05
4.2 Cell growth and death	Meiosis - yeast	24.24	5.68	19.663	229.34	27.92	96.711	<.0001	8.85947e-05
5.2 Endocrine system	Melanogenesis	4.14	1.48	5.115	45.15	5.08	17.588	<.0001	8.85947e-05
6.2 Cancer: specific types	Melanoma	0.38	0.15	0.535	6.16	0.7	2.416	<.0001	8.85947e-05
1.0 Global and overview maps	Metabolic pathways	37928	3676.37	12735.3	17939.3	987.94	3422.33	<.0001	8.85947e-05
1.11 Xenobiotics biodegradation and metabolism	Metabolism of xenobiotics by cytochrome P450	21.29	1.44	4.972	24.53	2.04	7.068	0.2482	0.268284
1.2 Energy metabolism	Methane metabolism	1294.18	86.79	300.665	770.68	46.47	160.989	<.0001	0.000134775
1.0 Global and overview maps	Microbial metabolism in diverse environments	8221.78	736.14	2550.06	4058.33	218.38	756.488	<.0001	8.85947e-05
6.1 Cancer: overview	MicroRNAs in cancer	139.1	16.25	56.291	91.3	6.54	22.672	0.013	0.0160431
5.4 Digestive system	Mineral absorption	3.02	0.51	1.752	0.99	0.18	0.636	0.0015	0.00199987
2.4 Replication and repair	Mismatch repair	2250.13	189.9	657.835	1132.35	64.47	223.336	<.0001	0.000114311
4.1 Transport and catabolism	Mitophagy - animal	3.84	1.52	5.281	65.64	8.48	29.39	<.0001	8.85947e-05
4.1 Transport and catabolism	Mitophagy - yeast	3.46	1.33	4.605	56.41	7.29	25.238	<.0001	8.85947e-05
1.10 Biosynthesis of other secondary metabolites	Monobactam biosynthesis	362.75	46.05	159.538	141.26	8.85	30.662	<.0001	0.000100008
2.2 Translation	mRNA surveillance pathway	17.98	6.12	21.193	248.1	29.93	103.677	<.0001	8.85947e-05
3.2 Signal transduction	mTOR signaling pathway	14.58	5.34	18.507	181.42	21.81	75.548	<.0001	8.85947e-05
1.11 Xenobiotics biodegradation and metabolism	Naphthalene degradation	4.35	0.62	2.132	2.52	0.4	1.381	0.0056	0.00704098
5.1 Immune system	Natural killer cell mediated cytotoxicity	0.97	0.36	1.237	11.62	1.57	5.438	<.0001	8.85947e-05
4.2 Cell growth and death	Necroptosis	550.08	24.56	85.091	689.37	44.91	155.557	0.0179	0.0215223
1.10 Biosynthesis of other secondary metabolites	Neomycin, kanamycin and gentamicin biosynthesis	63.84	4.29	14.866	28.68	1.87	6.483	<.0001	9.55496e-05
3.3 Signaling molecules and interaction	Neuroactive ligand-receptor interaction	12.77	1.55	5.355	7.88	1.02	3.518	0.0179	0.0215223
5.6 Nervous system	Neurotrophin signaling pathway	4.15	1.48	5.137	45.32	5.08	17.586	<.0001	8.85947e-05
3.2 Signal transduction	NF-kappa B signaling pathway	2.72	0.88	3.049	40.32	5.09	17.643	<.0001	8.85947e-05
1.7 Glycan biosynthesis and metabolism	N-Glycan biosynthesis	62.9	4.44	15.369	79.11	6.58	22.783	0.0496	0.0575391
1.8 Metabolism of cofactors and vitamins	Nicotinate and nicotinamide metabolism	875.29	101.14	350.376	382.92	23.26	80.558	<.0001	0.000100008
1.2 Energy metabolism	Nitrogen metabolism	727.32	67.55	234.011	372.58	19.06	66.028	<.0001	0.000100008
1.11 Xenobiotics biodegradation and metabolism	Nitrotoluene degradation	69.49	9.93	34.386	21.44	2.31	8.01	0.0002	0.000258781
5.1 Immune system	NOD-like receptor signaling pathway	641.98	83.31	288.598	370.3	22.53	78.055	0.0039	0.00497089
6.7 Endocrine and metabolic disease	Non-alcoholic fatty liver disease (NAFLD)	2.21	0.59	2.046	20.26	2.32	8.033	<.0001	9.55496e-05
2.4 Replication and repair	Non-homologous end-joining	1.01	0.37	1.288	16.15	2.03	7.018	<.0001	8.85947e-05
1.9 Metabolism of terpenoids and polyketides	Nonribosomal peptide structures	10.85	0.83	2.891	9.07	1.23	4.245	0.0377	0.0440363
6.2 Cancer: specific types	Non-small cell lung cancer	0.09	0.03	0.117	1.35	0.14	0.492	<.0001	8.85947e-05
3.2 Signal transduction	Notch signaling pathway	0.75	0.25	0.853	11.98	1.53	5.315	<.0001	8.85947e-05
1.10 Biosynthesis of other secondary metabolites	Novobiocin biosynthesis	152.76	24.09	83.462	48.77	3.56	12.319	<.0001	0.000100008
2.4 Replication and repair	Nucleotide excision repair	868.65	56.22	194.767	663.12	37.71	130.622	0.0047	0.00592507
5.7 Sensory system	Olfactory transduction	4.14	1.48	5.115	45.15	5.08	17.588	<.0001	8.85947e-05
1.8 Metabolism of cofactors and vitamins	One carbon pool by folate	1413.29	125.9	436.145	662.44	43.44	150.481	<.0001	0.000114311
4.2 Cell growth and death	Oocyte meiosis	25.16	8.76	30.331	333.47	41.1	142.388	<.0001	8.85947e-05
5.8 Development and regeneration	Osteoclast differentiation	6.45	1.77	6.125	11.65	1.59	5.5	0.0153	0.0186086
1.7 Glycan biosynthesis and metabolism	Other glycan degradation	660.48	49.44	171.256	387.57	25.66	88.894	0.0001	0.000209062
1.7 Glycan biosynthesis and metabolism	Other types of O-glycan biosynthesis	15.63	2.4	8.326	5.24	0.37	1.29	0.0001	0.000167778
5.2 Endocrine system	Ovarian steroidogenesis	0.08	0.03	0.104	0.02	0.01	0.032	0.0179	0.0215223
1.2 Energy metabolism	Oxidative phosphorylation	2008.45	217.71	754.178	880.02	40.88	141.602	<.0001	8.85947e-05
5.2 Endocrine system	Oxytocin signaling pathway	12.92	4.36	15.118	174.03	21.83	75.618	<.0001	8.85947e-05
4.2 Cell growth and death	p53 signaling pathway	0.34	0.16	0.554	6.09	0.73	2.516	<.0001	8.85947e-05
6.2 Cancer: specific types	Pancreatic cancer	3.17	1.19	4.11	46.63	5.72	19.83	<.0001	8.85947e-05
5.4 Digestive system	Pancreatic secretion	90.49	19.35	67.032	40.26	3.12	10.817	0.0067	0.00836786
1.8 Metabolism of cofactors and vitamins	Pantothenate and CoA biosynthesis	1415.43	142.49	493.609	580.72	38.75	134.242	<.0001	9.55496e-05
5.2 Endocrine system	Parathyroid hormone synthesis, secretion and action	3.8	1.17	4.067	48.61	5.98	20.698	<.0001	8.85947e-05
6.4 Neurodegenerative disease	Parkinson disease	1.49	0.28	0.974	12.8	1.99	6.885	<.0001	8.85947e-05
6.8 Infectious disease: bacterial	Pathogenic Escherichia coli infection	188.04	5.06	17.511	285.88	19.12	66.221	0.0007	0.000907193
6.1 Cancer: overview	Pathways in cancer	173.02	7.58	26.253	382.95	34.24	118.626	<.0001	0.000100008
6.1 Cancer: overview	PD-L1 expression and PD-1 checkpoint pathway in cancer	3.67	1.48	5.139	58.71	7.33	25.383	<.0001	8.85947e-05
1.10 Biosynthesis of other secondary metabolites	Penicillin and cephalosporin biosynthesis	70.8	4.65	16.092	48.84	3	10.397	0.0003	0.000491129
1.1 Carbohydrate metabolism	Pentose and glucuronate interconversions	968.03	63.21	218.982	550.52	34.31	118.864	0.0001	0.000209062
1.1 Carbohydrate metabolism	Pentose phosphate pathway	1244.01	89.72	310.816	664.69	37.72	130.655	<.0001	0.000114311
1.7 Glycan biosynthesis and metabolism	Peptidoglycan biosynthesis	1439.24	176.61	611.788	572.41	38.02	131.7	<.0001	8.85947e-05
4.1 Transport and catabolism	Peroxisome	283.65	21.91	75.904	172.66	8.87	30.718	<.0001	0.000134775
6.8 Infectious disease: bacterial	Pertussis	36.89	3.87	13.408	72.27	7.96	27.591	0.0008	0.00110768
4.1 Transport and catabolism	Phagosome	22.03	7.38	25.578	294.19	36.04	124.833	<.0001	8.85947e-05
1.10 Biosynthesis of other secondary metabolites	Phenazine biosynthesis	115.88	14.15	49.009	37.34	2.51	8.703	<.0001	9.55496e-05
1.5 Amino acid metabolism	Phenylalanine metabolism	340.97	19.2	66.507	188.46	11.49	39.814	<.0001	0.000100008
1.5 Amino acid metabolism	Phenylalanine, tyrosine and tryptophan biosynthesis	1427.95	160.33	555.41	539.98	35.07	121.496	<.0001	9.55496e-05
1.10 Biosynthesis of other secondary metabolites	Phenylpropanoid biosynthesis	386.59	27.78	96.216	214.95	14	48.507	<.0001	0.000114311
3.2 Signal transduction	Phosphatidylinositol signaling system	146.91	10.53	36.475	174.27	11.59	40.16	0.0735	0.0844379
3.2 Signal transduction	Phospholipase D signaling pathway	4.19	1.19	4.135	46.33	5.72	19.803	<.0001	8.85947e-05
1.6 Metabolism of other amino acids	Phosphonate and phosphinate metabolism	131.14	8.59	29.764	86.3	4.84	16.771	0.0005	0.000740744
3.1 Membrane transport	Phosphotransferase system (PTS)	147.35	22.9	79.313	49.62	3.93	13.627	<.0001	0.000114311
1.2 Energy metabolism	Photosynthesis	1012.53	129.36	448.111	309.74	19.66	68.093	<.0001	8.85947e-05
1.2 Energy metabolism	Photosynthesis - antenna proteins	3.75	0.59	2.056	3.37	0.15	0.52	0.4189	0.440914
5.7 Sensory system	Phototransduction	4.14	1.48	5.115	45.15	5.08	17.588	<.0001	8.85947e-05
5.7 Sensory system	Phototransduction - fly	4.14	1.48	5.115	45.15	5.08	17.588	<.0001	8.85947e-05
3.2 Signal transduction	PI3K-Akt signaling pathway	166.93	7.65	26.502	327.13	26.82	92.891	0.0002	0.000258781
3.2 Signal transduction	Plant hormone signal transduction	18.78	5.81	20.14	0.04	0.01	0.042	0.0019	0.0024706
5.10 Environmental adaptation	Plant-pathogen interaction	583.57	79.83	276.524	459.04	31.33	108.529	0.2253	0.244888
5.1 Immune system	Platelet activation	6.97	2.22	7.693	95.01	12.18	42.195	<.0001	8.85947e-05
6.12 Drug resistance: antineoplastic	Platinum drug resistance	27.34	6.87	23.809	30.81	3.53	12.244	0.119	0.133704
1.11 Xenobiotics biodegradation and metabolism	Polycyclic aromatic hydrocarbon degradation	0.06	0.06	0.197	0.02	0.01	0.052	0.3506	0.372888
1.9 Metabolism of terpenoids and polyketides	Polyketide sugar unit biosynthesis	404.41	41.33	143.167	151.76	10.29	35.649	<.0001	9.55496e-05
1.8 Metabolism of cofactors and vitamins	Porphyrin and chlorophyll metabolism	902.03	53.65	185.855	515.5	33.53	116.147	<.0001	0.000114311
5.2 Endocrine system	PPAR signaling pathway	116.82	11.8	40.889	197.9	15.81	54.783	0.0012	0.00165857
1.3 Lipid metabolism	Primary bile acid biosynthesis	20.61	1.18	4.083	20.79	1	3.457	0.954	0.95396
6.3 Immune disease	Primary immunodeficiency	123.79	9.29	32.181	66.33	3.94	13.661	<.0001	0.000134775
6.4 Neurodegenerative disease	Prion diseases	3.13	0.34	1.169	14.44	1.5	5.197	<.0001	0.000100008
1.10 Biosynthesis of other secondary metabolites	Prodigiosin biosynthesis	252.78	35.58	123.268	83.27	5.69	19.721	<.0001	9.55496e-05
5.2 Endocrine system	Progesterone-mediated oocyte maturation	145.05	6.65	23.037	169.22	11.03	38.216	0.0833	0.0948553
5.2 Endocrine system	Prolactin signaling pathway	0.01	0	0.015	0.04	0.02	0.067	0.1138	0.128925
1.1 Carbohydrate metabolism	Propanoate metabolism	716.56	80.08	277.414	293.71	17.39	60.239	<.0001	8.85947e-05
6.2 Cancer: specific types	Prostate cancer	143.77	6.7	23.207	151.5	9.14	31.645	0.5637	0.58259
2.3 Folding, sorting and degradation	Proteasome	10.16	3.26	11.295	150.43	19.81	68.61	<.0001	8.85947e-05
5.4 Digestive system	Protein digestion and absorption	31.7	3.75	12.992	11.85	0.84	2.91	<.0001	9.55496e-05
2.3 Folding, sorting and degradation	Protein export	1757.92	142.01	491.926	883.66	52.19	180.78	<.0001	0.000100008
2.3 Folding, sorting and degradation	Protein processing in endoplasmic reticulum	774.85	66.94	231.893	667.9	41.36	143.284	0.3865	0.407834
6.1 Cancer: overview	Proteoglycans in cancer	104.64	11.32	39.201	155.09	15.7	54.392	0.0377	0.0440363
5.5 Excretory system	Proximal tubule bicarbonate reclamation	19.09	1.76	6.103	21.88	2.81	9.751	0.729	0.740108
1.4 Nucleotide metabolism	Purine metabolism	3253.48	319.16	1105.61	1610.89	89.91	311.444	<.0001	0.000114311
1.4 Nucleotide metabolism	Pyrimidine metabolism	2753.37	234.66	812.9	1307.38	67.21	232.812	<.0001	9.55496e-05
1.1 Carbohydrate metabolism	Pyruvate metabolism	1744.38	151.87	526.082	923.95	47.91	165.956	<.0001	0.000114311
4.4 Cellular community - prokaryotes	Quorum sensing	2230.62	219.42	760.104	1020.74	55.66	192.823	<.0001	0.000100008
3.2 Signal transduction	Rap1 signaling pathway	5.15	1.75	6.062	59.35	7.95	27.543	<.0001	8.85947e-05
3.2 Signal transduction	Ras signaling pathway	6.46	2.3	7.953	80.44	9.21	31.892	<.0001	8.85947e-05
4.5 Cell motility	Regulation of actin cytoskeleton	13.17	4.33	15.002	177.23	23.55	81.587	<.0001	8.85947e-05
5.2 Endocrine system	Regulation of lipolysis in adipocytes	0.11	0.07	0.238	2.05	0.41	1.436	<.0001	0.000100008
6.2 Cancer: specific types	Renal cell carcinoma	3.36	0.43	1.491	2.4	0.35	1.203	0.0377	0.0440363
5.2 Endocrine system	Renin secretion	7.06	2.56	8.875	88.16	10.99	38.06	<.0001	8.85947e-05
5.2 Endocrine system	Renin-angiotensin system	16.91	3.24	11.22	6.37	0.51	1.779	<.0001	0.000134775
1.8 Metabolism of cofactors and vitamins	Retinol metabolism	9.91	1.84	6.379	6	0.57	1.986	0.0047	0.00592507
5.6 Nervous system	Retrograde endocannabinoid signaling	20.4	4.88	16.911	7.63	0.82	2.849	0.013	0.0160431
6.3 Immune disease	Rheumatoid arthritis	18.22	3.91	13.555	161.92	20.29	70.27	<.0001	8.85947e-05
1.8 Metabolism of cofactors and vitamins	Riboflavin metabolism	624.05	74.1	256.695	248.3	18.59	64.41	<.0001	8.85947e-05
2.2 Translation	Ribosome	12835.8	1047.54	3628.77	7024.89	348.24	1206.33	<.0001	0.000134775
2.2 Translation	Ribosome biogenesis in eukaryotes	138.25	17.52	60.694	249.72	25.67	88.938	0.0015	0.00199987
5.1 Immune system	RIG-I-like receptor signaling pathway	0.81	0.36	1.262	13.34	1.79	6.208	<.0001	8.85947e-05
2.3 Folding, sorting and degradation	RNA degradation	1145.12	103.47	358.445	738.7	42.69	147.868	0.0004	0.000603003
2.1 Transcription	RNA polymerase	463.35	35.32	122.343	283.31	14.79	51.221	0.0001	0.000209062
2.2 Translation	RNA transport	184.99	14.21	49.208	344.43	31.19	108.045	0.0005	0.000740744
5.4 Digestive system	Salivary secretion	4.3	1.47	5.083	45.29	5.07	17.575	<.0001	8.85947e-05
6.8 Infectious disease: bacterial	Salmonella infection	864.2	78.09	270.514	958.26	71.59	247.994	0.3263	0.348047
1.3 Lipid metabolism	Secondary bile acid biosynthesis	18.18	1.49	5.168	19.69	0.96	3.341	0.6861	0.698296
1.6 Metabolism of other amino acids	Selenocompound metabolism	491.05	54.98	190.46	211.34	13.85	47.993	<.0001	0.000100008
1.9 Metabolism of terpenoids and polyketides	Sesquiterpenoid and triterpenoid biosynthesis	22.11	7.7	26.68	0.38	0.12	0.422	0.0003	0.000491129
6.8 Infectious disease: bacterial	Shigellosis	242.14	54.33	188.196	407.46	49.92	172.919	0.0079	0.00991446
6.2 Cancer: specific types	Small cell lung cancer	2.41	0.75	2.593	28.85	3.73	12.934	<.0001	8.85947e-05
2.3 Folding, sorting and degradation	SNARE interactions in vesicular transport	1.82	0.81	2.81	24.62	2.86	9.924	<.0001	9.55496e-05
1.3 Lipid metabolism	Sphingolipid metabolism	435.5	44.32	153.539	247.71	16.11	55.795	0.0003	0.000398834
3.2 Signal transduction	Sphingolipid signaling pathway	9.58	3.32	11.501	133.05	15.93	55.167	<.0001	8.85947e-05
6.4 Neurodegenerative disease	Spinocerebellar ataxia	48.06	3.92	13.568	94.98	8.28	28.689	0.0003	0.000491129
2.1 Transcription	Spliceosome	57.09	6.81	23.579	263.2	28.29	97.986	<.0001	9.55496e-05
6.8 Infectious disease: bacterial	Staphylococcus aureus infection	1.84	0.32	1.112	1.24	0.2	0.706	0.204	0.223534
1.1 Carbohydrate metabolism	Starch and sucrose metabolism	1434.82	144.66	501.122	792.48	44.79	155.14	0.0001	0.000167778
1.3 Lipid metabolism	Steroid biosynthesis	23.21	7.51	26.024	15.44	1.93	6.695	0.9081	0.910343
1.11 Xenobiotics biodegradation and metabolism	Steroid degradation	0.02	0.02	0.064	0	0	0	0.3173	0.340218
1.3 Lipid metabolism	Steroid hormone biosynthesis	3.85	0.33	1.16	2.44	0.17	0.578	0.0015	0.00199987
1.10 Biosynthesis of other secondary metabolites	Stilbenoid, diarylheptanoid and gingerol biosynthesis	66.64	6.19	21.459	27.08	1.56	5.391	<.0001	8.85947e-05
1.10 Biosynthesis of other secondary metabolites	Streptomycin biosynthesis	594.15	58.14	201.393	246	13.8	47.787	<.0001	0.000100008
1.11 Xenobiotics biodegradation and metabolism	Styrene degradation	5.53	0.52	1.811	4.79	0.39	1.357	0.2253	0.244888
1.2 Energy metabolism	Sulfur metabolism	419.8	56.8	196.751	159.44	14.52	50.313	<.0001	0.000134775
2.3 Folding, sorting and degradation	Sulfur relay system	480.91	64.67	224.034	165.49	12.96	44.88	<.0001	0.000134775
5.6 Nervous system	Synaptic vesicle cycle	13.78	5.01	17.37	188.34	23.85	82.626	<.0001	8.85947e-05
1.3 Lipid metabolism	Synthesis and degradation of ketone bodies	26.12	1.66	5.761	19.52	1.97	6.836	0.0094	0.0116386
6.3 Immune disease	Systemic lupus erythematosus	36.83	11.27	39.035	432.71	59.18	205.009	<.0001	8.85947e-05
5.1 Immune system	T cell receptor signaling pathway	0.85	0.34	1.186	11.77	1.59	5.516	<.0001	8.85947e-05
1.6 Metabolism of other amino acids	Taurine and hypotaurine metabolism	230.13	21.05	72.919	116.94	7.65	26.504	<.0001	0.000114311
1.9 Metabolism of terpenoids and polyketides	Terpenoid backbone biosynthesis	840.15	80.74	279.681	427.51	26.27	91.009	<.0001	0.000114311
3.2 Signal transduction	TGF-beta signaling pathway	8.59	3.23	11.201	121.67	15.83	54.838	<.0001	8.85947e-05
5.1 Immune system	Th1 and Th2 cell differentiation	0.68	0.35	1.202	11.32	1.58	5.456	<.0001	8.85947e-05
5.1 Immune system	Th17 cell differentiation	144.13	6.64	22.99	157.67	9.84	34.09	0.3263	0.348047
5.10 Environmental adaptation	Thermogenesis	70.97	7.43	25.727	102.39	10.08	34.915	0.0282	0.0334053
1.8 Metabolism of cofactors and vitamins	Thiamine metabolism	764.85	84.75	293.584	339.39	24.62	85.284	<.0001	0.000134775
6.2 Cancer: specific types	Thyroid cancer	0.08	0.03	0.09	1.18	0.13	0.453	<.0001	8.85947e-05
5.2 Endocrine system	Thyroid hormone signaling pathway	1.16	0.44	1.509	13.56	1.67	5.8	<.0001	9.55496e-05
5.2 Endocrine system	Thyroid hormone synthesis	248.66	12.42	43.037	150.27	6.28	21.766	<.0001	0.000100008
4.3 Cellular community - eukaryotes	Tight junction	13.04	4.25	14.716	157.53	19	65.827	<.0001	8.85947e-05
3.2 Signal transduction	TNF signaling pathway	0.01	0.01	0.029	0.22	0.05	0.178	<.0001	0.00010289
5.1 Immune system	Toll and Imd signaling pathway	4.69	1.61	5.571	64.77	9.85	34.121	<.0001	8.85947e-05
5.1 Immune system	Toll-like receptor signaling pathway	0.01	0.01	0.029	0.22	0.05	0.178	<.0001	0.00010289
1.11 Xenobiotics biodegradation and metabolism	Toluene degradation	0.81	0.17	0.594	0.81	0.09	0.326	0.4529	0.475448
6.10 Infectious disease: parasitic	Toxoplasmosis	9.67	3.54	12.275	149.63	18.62	64.504	<.0001	8.85947e-05
6.1 Cancer: overview	Transcriptional misregulation in cancer	8.36	2.76	9.561	102.25	13.27	45.965	<.0001	8.85947e-05
1.10 Biosynthesis of other secondary metabolites	Tropane, piperidine and pyridine alkaloid biosynthesis	122.61	17.65	61.149	42.11	3.15	10.928	<.0001	0.000100008
1.5 Amino acid metabolism	Tryptophan metabolism	68.27	6.47	22.405	39	2.73	9.448	0.0004	0.000603003
6.8 Infectious disease: bacterial	Tuberculosis	303.99	20.01	69.322	336.11	20.34	70.448	0.1842	0.202934
3.2 Signal transduction	Two-component system	3297.61	432.62	1498.64	1249.26	70.5	244.229	<.0001	9.55496e-05
6.7 Endocrine and metabolic disease	Type I diabetes mellitus	150.97	6.39	22.142	113.4	8.74	30.27	0.0032	0.00414441
6.7 Endocrine and metabolic disease	Type II diabetes mellitus	81.79	5.27	18.251	63.38	4.02	13.926	0.0153	0.0186086
1.5 Amino acid metabolism	Tyrosine metabolism	129.56	17.43	60.371	48.76	3.72	12.901	<.0001	0.000134775
1.8 Metabolism of cofactors and vitamins	Ubiquinone and other terpenoid-quinone biosynthesis	278.34	30.04	104.054	102.13	7.15	24.772	<.0001	8.85947e-05
2.3 Folding, sorting and degradation	Ubiquitin mediated proteolysis	17.83	6.56	22.735	245.49	32.71	113.32	<.0001	8.85947e-05
1.5 Amino acid metabolism	Valine, leucine and isoleucine biosynthesis	781.17	102.56	355.29	288.59	17.88	61.921	<.0001	0.000100008
1.5 Amino acid metabolism	Valine, leucine and isoleucine degradation	304.24	22.36	77.442	154.4	7.56	26.188	<.0001	8.85947e-05
6.11 Drug resistance: antimicrobial	Vancomycin resistance	641.89	60.41	209.267	324.2	19.86	68.801	<.0001	0.000114311
1.7 Glycan biosynthesis and metabolism	Various types of N-glycan biosynthesis	70.49	3.14	10.877	98.07	6.92	23.967	0.0027	0.00350081
5.3 Circulatory system	Vascular smooth muscle contraction	11.11	3.64	12.605	140.16	17.09	59.197	<.0001	8.85947e-05
5.5 Excretory system	Vasopressin-regulated water reabsorption	9.58	5.22	18.07	95.75	13.04	45.186	<.0001	0.000100008
3.2 Signal transduction	VEGF signaling pathway	0.71	0.37	1.268	11.71	1.62	5.615	<.0001	8.85947e-05
6.8 Infectious disease: bacterial	Vibrio cholerae infection	14.92	5.31	18.38	195.5	24.49	84.839	<.0001	8.85947e-05
6.1 Cancer: overview	Viral carcinogenesis	94.17	4.94	17.104	250.7	26.45	91.615	<.0001	8.85947e-05
6.6 Cardiovascular disease	Viral myocarditis	0.29	0.05	0.185	0.37	0.09	0.312	0.5637	0.58259
1.8 Metabolism of cofactors and vitamins	Vitamin B6 metabolism	445.52	51.58	178.683	178.17	14.09	48.811	<.0001	0.000114311
5.4 Digestive system	Vitamin digestion and absorption	0.52	0.23	0.805	11.42	1.44	4.993	<.0001	8.85947e-05
3.2 Signal transduction	Wnt signaling pathway	11.16	4.14	14.336	158.99	20.69	71.659	<.0001	8.85947e-05
1.11 Xenobiotics biodegradation and metabolism	Xylene degradation	23.97	2.55	8.827	14.49	1.1	3.798	0.0032	0.00414441
6.8 Infectious disease: bacterial	Yersinia infection	1.15	0.41	1.429	14.26	1.59	5.51	<.0001	8.85947e-05
1.9 Metabolism of terpenoids and polyketides	Zeatin biosynthesis	134.51	15.17	52.567	52.31	3.16	10.957	<.0001	8.85947e-05

## Sheet: level2 in metatranscriptome
KEGG_level2	Jersey			Holstein			P	Adjust-P
	Average relative abundance	Standard error of the mean	Standard deviation	Average relative abundance	Standard error of the mean	Standard deviation
1.0 Global and overview maps	32529.4	5560.3	1605.1	56755.9	13121.5	3787.8	<.0001	0.000407263
1.1 Carbohydrate metabolism	19283.5	3637.2	1050	27650.8	6948.7	2005.9	0.0018	0.00289124
1.10 Biosynthesis of other secondary metabolites	1906.2	294	84.9	6330.2	2527.1	729.5	0.0001	0.000455661
1.11 Xenobiotics biodegradation and metabolism	1210.6	269.8	77.9	1576	239	69	0.0039	0.00577584
1.2 Energy metabolism	15512.6	3164.8	913.6	24230.8	7072.5	2041.6	0.0005	0.00122361
1.3 Lipid metabolism	1454.2	254	73.3	3462.7	1024.7	295.8	<.0001	0.000407263
1.4 Nucleotide metabolism	2822	448.7	129.5	4976.8	1152.3	332.6	0.0001	0.000455661
1.5 Amino acid metabolism	5050.1	1030.1	297.4	10058.2	2150.5	620.8	<.0001	0.000407263
1.6 Metabolism of other amino acids	1634.3	340.3	98.2	2265.1	291.7	84.2	0.0002	0.00059489
1.7 Glycan biosynthesis and metabolism	1343	328.3	94.8	2352.4	437.1	126.2	<.0001	0.000441481
1.8 Metabolism of cofactors and vitamins	3906.5	665	192	8143.2	1747.6	504.5	<.0001	0.000407263
1.9 Metabolism of terpenoids and polyketides	802.5	157.9	45.6	1488.9	338.4	97.7	<.0001	0.000407263
2.1 Transcription	1634	559.8	161.6	4136.5	1039.9	300.2	<.0001	0.000407263
2.2 Translation	45437.7	10679.1	3082.8	146890	72818.5	21020.9	<.0001	0.000441481
2.3 Folding, sorting and degradation	5909.3	1099	317.3	10463.1	2439.3	704.2	0.0001	0.000455661
2.4 Replication and repair	1890.8	340.6	98.3	2702.1	435.9	125.8	0.0003	0.000879515
3.1 Membrane transport	4100.8	805.3	232.5	10368.2	3876.6	1119.1	0.0001	0.000455661
3.2 Signal transduction	9620.7	1849.5	533.9	26220.1	11985.5	3459.9	0.0002	0.00059489
3.3 Signaling molecules and interaction	0	0	0	0.2	0.4	0.1	0.0706	0.0928222
4.1 Transport and catabolism	2860.1	2164.6	624.9	748.7	440.2	127.1	0.0018	0.00289124
4.2 Cell growth and death	3121.7	1267.4	365.9	2331.5	350.2	101.1	0.119	0.152098
4.3 Cellular community - eukaryotes	2287.1	1875.3	541.4	293.7	377.1	108.9	0.0002	0.00059489
4.4 Cellular community - prokaryotes	4611.4	799.1	230.7	9934.7	2949.5	851.5	0.0001	0.000455661
4.5 Cell motility	3694.2	933.8	269.6	6990.4	2394	691.1	0.0008	0.00162423
5.1 Immune system	3754.6	1103.1	318.4	4633	1992.8	575.3	0.3263	0.366147
5.10 Environmental adaptation	6975	1061.5	306.4	10003.3	2820.2	814.1	0.0018	0.00289124
5.2 Endocrine system	1472.8	506.9	146.3	1394.6	223.6	64.6	0.8174	0.817361
5.3 Circulatory system	31.2	25.1	7.3	5.4	6.9	2	0.0012	0.00225268
5.4 Digestive system	136.7	88.5	25.6	190.4	100.4	29	0.1842	0.22299
5.5 Excretory system	154.1	67.7	19.5	123.9	56.1	16.2	0.2987	0.343502
5.6 Nervous system	172	65.2	18.8	133.2	25.8	7.4	0.2253	0.265792
5.7 Sensory system	16.6	15.2	4.4	2	3	0.9	0.0004	0.00103759
5.8 Development and regeneration	24.1	20.7	6	4.1	2.7	0.8	0.0209	0.0283053
5.9 Aging	568.4	198.7	57.4	1290.1	533.4	154	0.0008	0.00162423
6.1 Cancer: overview	565.1	286.8	82.8	552.6	126	36.4	0.729	0.745235
6.10 Infectious disease: parasitic	90.8	65	18.8	26	14.1	4.1	0.0015	0.00264706
6.11 Drug resistance: antimicrobial	548.1	107.1	30.9	1180.8	339.3	97.9	<.0001	0.000441481
6.12 Drug resistance: antineoplastic	533.6	114.7	33.1	720	145.5	42	0.0047	0.00671188
6.2 Cancer: specific types	120.7	72.4	20.9	155.8	69.1	19.9	0.1842	0.22299
6.3 Immune disease	290.1	191.4	55.3	117.2	83.5	24.1	0.0067	0.00927907
6.4 Neurodegenerative disease	5590.2	2288.7	660.7	5935.5	2294	662.2	0.729	0.745235
6.5 Substance dependence	237.2	189.8	54.8	55.1	86.8	25.1	0.001	0.00191415
6.6 Cardiovascular disease	415	155.5	44.9	789.8	311.8	90	0.0027	0.0041096
6.7 Endocrine and metabolic disease	900.5	164.5	47.5	1323.2	288.3	83.2	0.0007	0.00144207
6.8 Infectious disease: bacterial	10360.2	3724.7	1075.2	11596.9	3327.1	960.5	0.4189	0.458821
6.9 Infectious disease: viral	191.5	131.6	38	136.7	54.4	15.7	0.5637	0.603031

## Sheet: level3 in metatranscriptiome
KEGG_level2	KEGG_level3	Jersey			Holstein			P	Adjust-P
		Average relative abundance	Standard error of the mean	Standard deviation	Average relative abundance	Standard error of the mean	Standard deviation
1.0 Global and overview maps	2-Oxocarboxylic acid metabolism	641.95	42.69	147.877	2067.74	217.2	752.397	<.0001	0.000644096
3.1 Membrane transport	ABC transporters	663.72	29.31	101.545	3355.5	565.56	1959.15	0.0001	0.00096085
1.10 Biosynthesis of other secondary metabolites	Acarbose and validamycin biosynthesis	79.24	4.41	15.287	222.92	26.15	90.599	<.0001	0.000711463
6.2 Cancer: specific types	Acute myeloid leukemia	0.13	0.04	0.153	0.03	0.02	0.065	0.1012	0.136297
4.3 Cellular community - eukaryotes	Adherens junction	4.07	1.12	3.87	0.8	0.32	1.093	0.0375	0.0572846
5.2 Endocrine system	Adipocytokine signaling pathway	147.38	11.74	40.663	176.63	16.85	58.365	0.1842	0.230559
5.3 Circulatory system	Adrenergic signaling in cardiomyocytes	30.73	7.2	24.94	4.35	2.01	6.954	0.0004	0.00164638
6.10 Infectious disease: parasitic	African trypanosomiasis	3.59	0.88	3.061	2.25	0.55	1.901	0.3263	0.38025
1.5 Amino acid metabolism	Alanine, aspartate and glutamate metabolism	1043.02	59.56	206.305	2394.08	186.36	645.558	<.0001	0.000644096
6.5 Substance dependence	Alcoholism	234.78	54.15	187.568	54.95	25.01	86.648	0.001	0.0028079
5.2 Endocrine system	Aldosterone synthesis and secretion	9.4	2.84	9.836	1.14	0.49	1.707	0.0033	0.00643951
6.3 Immune disease	Allograft rejection	0.02	0.01	0.034	0	0	0.007	0.104	0.136737
1.3 Lipid metabolism	alpha-Linolenic acid metabolism	0.44	0.16	0.541	0.47	0.18	0.613	0.8151	0.838985
6.4 Neurodegenerative disease	Alzheimer disease	3014.24	246.72	854.659	5227.69	625.2	2165.76	0.0032	0.00643951
1.1 Carbohydrate metabolism	Amino sugar and nucleotide sugar metabolism	1641.96	111.79	387.235	2281.39	142.52	493.712	0.0015	0.00365102
2.2 Translation	Aminoacyl-tRNA biosynthesis	2007.29	133.65	462.972	2959.54	89.52	310.097	0.0001	0.00096085
1.11 Xenobiotics biodegradation and metabolism	Aminobenzoate degradation	38.08	6.61	22.905	51.8	9.39	32.533	0.3263	0.38025
6.10 Infectious disease: parasitic	Amoebiasis	11.95	0.96	3.324	12.76	1.41	4.884	0.8174	0.838985
6.5 Substance dependence	Amphetamine addiction	19.08	5	17.319	2.21	0.94	3.267	0.0004	0.00164638
3.2 Signal transduction	AMPK signaling pathway	227.35	19.05	65.975	204.29	15.26	52.848	0.3865	0.446288
6.4 Neurodegenerative disease	Amyotrophic lateral sclerosis (ALS)	167.79	36.39	126.044	173.62	19.4	67.192	0.3263	0.38025
6.12 Drug resistance: antineoplastic	Antifolate resistance	515.5	34.66	120.069	707.07	41.9	145.136	0.0047	0.00862678
5.1 Immune system	Antigen processing and presentation	279.22	59.14	204.854	164.32	21.55	74.641	0.1659	0.209617
3.2 Signal transduction	Apelin signaling pathway	16.59	3.53	12.231	5.95	1.36	4.696	0.0111	0.0190128
4.2 Cell growth and death	Apoptosis	1405.29	309.65	1072.66	235.48	66.62	230.768	0.0005	0.00182671
4.2 Cell growth and death	Apoptosis - fly	35.74	9.25	32.047	25.31	11.11	38.485	0.0833	0.113756
4.2 Cell growth and death	Apoptosis - multiple species	1.06	0.27	0.951	0.1	0.04	0.137	0.0003	0.00155271
1.7 Glycan biosynthesis and metabolism	Arabinogalactan biosynthesis - Mycobacterium	11.04	1.15	3.97	25.24	2.88	9.993	0.0003	0.0013197
1.3 Lipid metabolism	Arachidonic acid metabolism	165.81	36.07	124.95	173.83	19.53	67.64	0.2253	0.279342
1.5 Amino acid metabolism	Arginine and proline metabolism	172.35	12.18	42.196	336.41	23.61	81.791	0.0001	0.00096085
1.5 Amino acid metabolism	Arginine biosynthesis	660.88	49.78	172.434	1505.24	151.25	523.962	<.0001	0.000744759
1.1 Carbohydrate metabolism	Ascorbate and aldarate metabolism	129.38	12.9	44.674	143.85	7.18	24.871	0.106	0.138437
1.11 Xenobiotics biodegradation and metabolism	Atrazine degradation	0.31	0.27	0.952	5.83	2.16	7.481	0.0052	0.00961077
6.3 Immune disease	Autoimmune thyroid disease	0.02	0.01	0.034	0	0	0.007	0.104	0.136737
4.1 Transport and catabolism	Autophagy - animal	184.62	44.29	153.431	24.67	8.09	28.026	0.0004	0.00164638
4.1 Transport and catabolism	Autophagy - other	8.46	2.12	7.344	1.32	0.63	2.168	0.0012	0.00327601
4.1 Transport and catabolism	Autophagy - yeast	31.51	7.37	25.533	12.51	3.46	11.995	0.0567	0.0827736
5.8 Development and regeneration	Axon guidance	20.11	5.41	18.73	1.23	0.61	2.118	0.0014	0.00365102
5.8 Development and regeneration	Axon regeneration	2.77	0.55	1.919	2.72	0.65	2.24	0.729	0.768656
5.1 Immune system	B cell receptor signaling pathway	2.49	0.69	2.401	0.17	0.08	0.29	0.0042	0.00787674
4.5 Cell motility	Bacterial chemotaxis	304.65	35.71	123.704	2158.53	429.98	1489.48	0.0002	0.00113736
6.8 Infectious disease: bacterial	Bacterial invasion of epithelial cells	31.69	8.03	27.828	6.05	2.94	10.188	0.0018	0.0041358
3.1 Membrane transport	Bacterial secretion system	3383.78	222.3	770.056	6866.88	592.83	2053.62	0.0002	0.00104394
6.2 Cancer: specific types	Basal cell carcinoma	0.01	0.01	0.025	0	0	0	0.3173	0.376503
2.1 Transcription	Basal transcription factors	16.19	3.94	13.664	8.3	2.59	8.985	0.1333	0.171863
2.4 Replication and repair	Base excision repair	324.48	24.88	86.191	367.82	16.97	58.791	0.0647	0.0919143
1.11 Xenobiotics biodegradation and metabolism	Benzoate degradation	491.6	39.74	137.659	627.59	49.36	170.976	0.0647	0.0919143
1.6 Metabolism of other amino acids	beta-Alanine metabolism	107.51	6.73	23.327	246.37	19.83	68.682	<.0001	0.000644096
6.11 Drug resistance: antimicrobial	beta-Lactam resistance	102.16	5.62	19.481	405.66	57.76	200.098	<.0001	0.000644096
1.10 Biosynthesis of other secondary metabolites	Betalain biosynthesis	0.03	0.03	0.094	0.08	0.03	0.115	0.1027	0.136737
5.4 Digestive system	Bile secretion	5.47	1.62	5.616	0.72	0.26	0.906	0.0015	0.00365102
4.4 Cellular community - prokaryotes	Biofilm formation - Escherichia coli	959.65	53.21	184.328	1744.91	133.61	462.851	0.0002	0.00113736
4.4 Cellular community - prokaryotes	Biofilm formation - Pseudomonas aeruginosa	93.31	19.17	66.414	888.78	178.5	618.326	0.0005	0.00182671
4.4 Cellular community - prokaryotes	Biofilm formation - Vibrio cholerae	304.55	17.37	60.179	1380.74	214.79	744.06	0.0004	0.00164638
1.0 Global and overview maps	Biosynthesis of amino acids	8812.87	502.71	1741.43	15812.8	1292.29	4476.64	<.0001	0.000644096
1.9 Metabolism of terpenoids and polyketides	Biosynthesis of ansamycins	234.53	20.52	71.091	257.29	21.72	75.247	0.6861	0.72934
1.0 Global and overview maps	Biosynthesis of antibiotics	15288	742.68	2572.73	29099.2	2311.65	8007.78	<.0001	0.000644096
1.0 Global and overview maps	Biosynthesis of secondary metabolites	18243.9	859.79	2978.39	34293.8	2590.94	8975.27	<.0001	0.000644096
1.9 Metabolism of terpenoids and polyketides	Biosynthesis of siderophore group nonribosomal peptides	0	0	0	0.01	0.01	0.018	0.3173	0.376503
1.3 Lipid metabolism	Biosynthesis of unsaturated fatty acids	3.34	0.47	1.629	17.5	4.74	16.42	0.0111	0.0190128
1.9 Metabolism of terpenoids and polyketides	Biosynthesis of vancomycin group antibiotics	22.79	1.55	5.374	121.78	20.6	71.37	<.0001	0.000744759
#N/A	Biosynthesis of various secondary metabolites - part 2	752.06	62.96	218.11	3662.33	551.97	1912.09	0.0004	0.00164638
1.10 Biosynthesis of other secondary metabolites	Biosynthesis of various secondary metabolites - part 3	0.14	0.05	0.182	0.23	0.09	0.31	0.5098	0.560332
1.8 Metabolism of cofactors and vitamins	Biotin metabolism	322.54	21.29	73.737	1189.41	137.23	475.391	<.0001	0.000644096
6.2 Cancer: specific types	Breast cancer	0.18	0.06	0.191	0.05	0.02	0.071	0.0577	0.0839026
1.1 Carbohydrate metabolism	Butanoate metabolism	2594.02	176.64	611.893	4579.89	346.06	1198.78	0.0001	0.00096085
1.1 Carbohydrate metabolism	C5-Branched dibasic acid metabolism	169.97	17.95	62.198	702.45	114.89	397.978	0.0002	0.00104394
3.2 Signal transduction	Calcium signaling pathway	11.87	3.36	11.637	1.35	0.55	1.892	0.0017	0.0041358
3.2 Signal transduction	cAMP signaling pathway	18.49	4.83	16.741	2.25	0.94	3.257	0.0005	0.00182671
1.11 Xenobiotics biodegradation and metabolism	Caprolactam degradation	1.83	0.39	1.367	1.59	0.28	0.979	0.954	0.95396
1.10 Biosynthesis of other secondary metabolites	Carbapenem biosynthesis	13.89	1.35	4.688	64.36	8.25	28.585	<.0001	0.000644096
5.4 Digestive system	Carbohydrate digestion and absorption	103.64	20.7	71.705	171.71	29.19	101.123	0.0735	0.101471
1.2 Energy metabolism	Carbon fixation in photosynthetic organisms	8394.57	550.19	1905.92	11756.9	1074.82	3723.29	0.0179	0.0292245
1.2 Energy metabolism	Carbon fixation pathways in prokaryotes	4954.83	333.95	1156.83	6331.76	418	1447.98	0.0282	0.0438291
1.0 Global and overview maps	Carbon metabolism	14087.8	802.47	2779.82	20427.9	1669.18	5782.2	0.0022	0.00485261
5.3 Circulatory system	Cardiac muscle contraction	0.49	0.21	0.728	1.02	0.51	1.778	0.3953	0.455176
1.9 Metabolism of terpenoids and polyketides	Carotenoid biosynthesis	0.11	0.07	0.227	0.29	0.09	0.327	0.1143	0.14877
6.11 Drug resistance: antimicrobial	Cationic antimicrobial peptide (CAMP) resistance	260.3	14.95	51.772	635.29	69.57	241.005	0.0002	0.00113736
4.2 Cell growth and death	Cell cycle	32.56	9.09	31.493	5.45	2.71	9.396	0.0015	0.00365102
4.2 Cell growth and death	Cell cycle - Caulobacter	829.3	55.73	193.06	1147.74	63.49	219.921	0.0015	0.00365102
4.2 Cell growth and death	Cell cycle - yeast	33.6	8.87	30.721	5.63	2.62	9.089	0.0012	0.00327601
4.2 Cell growth and death	Cellular senescence	19.7	5.14	17.809	2.4	1.01	3.494	0.0005	0.00182671
6.1 Cancer: overview	Central carbon metabolism in cancer	156.76	10.77	37.316	225.2	14.04	48.645	0.0018	0.0041358
3.2 Signal transduction	cGMP-PKG signaling pathway	19.08	5	17.319	2.26	0.94	3.255	0.0005	0.00182671
6.10 Infectious disease: parasitic	Chagas disease (American trypanosomiasis)	8.25	1.92	6.666	1.18	0.59	2.046	0.0004	0.00164638
6.1 Cancer: overview	Chemical carcinogenesis	6.58	1.4	4.857	0.84	0.26	0.887	0.0002	0.00104394
1.11 Xenobiotics biodegradation and metabolism	Chloroalkane and chloroalkene degradation	11.86	1.02	3.542	12.45	1.27	4.404	0.6861	0.72934
1.11 Xenobiotics biodegradation and metabolism	Chlorocyclohexane and chlorobenzene degradation	0.23	0.14	0.471	0.07	0.04	0.149	0.4723	0.52809
5.4 Digestive system	Cholesterol metabolism	9.31	3.17	10.975	1.05	0.46	1.582	0.0018	0.0041358
6.1 Cancer: overview	Choline metabolism in cancer	23.38	5.83	20.181	5.02	0.94	3.254	0.0027	0.00568255
6.2 Cancer: specific types	Chronic myeloid leukemia	0.01	0.01	0.025	0	0	0	0.3173	0.376503
5.10 Environmental adaptation	Circadian entrainment	9.39	2.84	9.838	1.15	0.5	1.722	0.0037	0.00718176
5.10 Environmental adaptation	Circadian rhythm	16.59	5.03	17.412	2.72	1.28	4.438	0.0064	0.0115357
5.10 Environmental adaptation	Circadian rhythm - plant	3.04	0.88	3.05	0.57	0.19	0.669	0.1017	0.13655
1.1 Carbohydrate metabolism	Citrate cycle (TCA cycle)	3230.49	199.34	690.525	5713.89	495.78	1717.45	0.0001	0.00096085
5.5 Excretory system	Collecting duct acid secretion	21.96	5.03	17.408	2.26	0.93	3.233	0.0002	0.00104394
6.2 Cancer: specific types	Colorectal cancer	0.19	0.07	0.227	0.05	0.03	0.101	0.0686	0.0967235
5.1 Immune system	C-type lectin receptor signaling pathway	11.8	3.34	11.577	1.31	0.55	1.889	0.0016	0.00391319
6.7 Endocrine and metabolic disease	Cushing syndrome	0.93	0.23	0.805	4.21	1.35	4.677	0.0015	0.00365102
1.3 Lipid metabolism	Cutin, suberine and wax biosynthesis	0.16	0.05	0.173	0.11	0.04	0.128	0.6824	0.72934
1.6 Metabolism of other amino acids	Cyanoamino acid metabolism	443.84	29.36	101.708	520.91	21.76	75.387	0.0496	0.0732438
1.5 Amino acid metabolism	Cysteine and methionine metabolism	966.91	55.38	191.829	1977.37	147.7	511.651	<.0001	0.000644096
5.1 Immune system	Cytosolic DNA-sensing pathway	1.24	0.4	1.393	0.3	0.15	0.521	0.0046	0.00858454
1.6 Metabolism of other amino acids	D-Alanine metabolism	95.81	6.89	23.879	129.69	3.94	13.657	0.0012	0.00327601
1.6 Metabolism of other amino acids	D-Arginine and D-ornithine metabolism	1.01	0.32	1.102	0.62	0.27	0.926	0.6427	0.690433
1.0 Global and overview maps	Degradation of aromatic compounds	52.76	3.64	12.623	36.55	2.57	8.92	0.0015	0.00365102
1.6 Metabolism of other amino acids	D-Glutamine and D-glutamate metabolism	67.5	4.2	14.54	132.76	10.18	35.271	<.0001	0.000644096
1.11 Xenobiotics biodegradation and metabolism	Dioxin degradation	6.26	0.78	2.719	9.25	1.69	5.848	0.3263	0.38025
2.4 Replication and repair	DNA replication	950.29	43.34	150.147	1447.32	80.56	279.068	0.0003	0.00155271
5.6 Nervous system	Dopaminergic synapse	32.76	7.65	26.513	4.53	2.07	7.184	0.0005	0.00182671
5.8 Development and regeneration	Dorso-ventral axis formation	1.23	0.35	1.217	0.16	0.08	0.269	0.0037	0.00718176
1.11 Xenobiotics biodegradation and metabolism	Drug metabolism - cytochrome P450	6.58	1.4	4.857	0.84	0.26	0.887	0.0002	0.00104394
1.11 Xenobiotics biodegradation and metabolism	Drug metabolism - other enzymes	657.14	40.38	139.887	854.13	32.21	111.577	0.0015	0.00365102
6.12 Drug resistance: antineoplastic	EGFR tyrosine kinase inhibitor resistance	9.49	2.08	7.211	5.05	1.18	4.073	0.0647	0.0919143
5.5 Excretory system	Endocrine and other factor-regulated calcium reabsorption	19.79	5.54	19.186	3.7	1.79	6.198	0.0032	0.00643951
6.12 Drug resistance: antineoplastic	Endocrine resistance	0.13	0.04	0.153	0.03	0.02	0.065	0.1012	0.136297
4.1 Transport and catabolism	Endocytosis	65.04	16.35	56.631	10.18	4.89	16.926	0.0008	0.00246173
6.2 Cancer: specific types	Endometrial cancer	0.06	0.03	0.11	0.01	0.01	0.042	0.4644	0.522246
6.8 Infectious disease: bacterial	Epithelial cell signaling in Helicobacter pylori infection	110.2	6.98	24.181	135.04	5.49	19.006	0.0243	0.0383953
6.9 Infectious disease: viral	Epstein-Barr virus infection	13.01	3.14	10.887	2.07	0.84	2.905	0.0012	0.00327601
3.2 Signal transduction	ErbB signaling pathway	0.13	0.04	0.153	0.03	0.02	0.065	0.1012	0.136297
5.2 Endocrine system	Estrogen signaling pathway	99.79	17.28	59.873	147.78	20.25	70.132	0.106	0.138437
1.3 Lipid metabolism	Ether lipid metabolism	3	0.69	2.374	0.96	0.19	0.661	0.013	0.0219069
2.4 Replication and repair	Fanconi anemia pathway	1.51	0.5	1.724	0.33	0.19	0.673	0.0417	0.0632355
1.3 Lipid metabolism	Fatty acid biosynthesis	645.69	48.06	166.485	2369.1	244.29	846.258	<.0001	0.000644096
1.3 Lipid metabolism	Fatty acid degradation	95.42	5.36	18.572	111.73	5.7	19.734	0.0833	0.113756
1.3 Lipid metabolism	Fatty acid elongation	3.3	0.89	3.1	0.83	0.34	1.173	0.0208	0.0335433
1.0 Global and overview maps	Fatty acid metabolism	687.67	47.61	164.928	2408.11	246.19	852.822	<.0001	0.000644096
5.1 Immune system	Fc gamma R-mediated phagocytosis	30.3	7.41	25.674	3.37	1.6	5.526	0.0007	0.00211103
4.2 Cell growth and death	Ferroptosis	49.37	3.48	12.041	64.05	4.96	17.165	0.0327	0.0500926
4.5 Cell motility	Flagellar assembly	3425.41	251.47	871.13	5153.27	550.71	1907.71	0.013	0.0219069
1.10 Biosynthesis of other secondary metabolites	Flavone and flavonol biosynthesis	3.03	0.66	2.285	6	0.53	1.84	0.0018	0.0041358
1.10 Biosynthesis of other secondary metabolites	Flavonoid biosynthesis	9.15	0.75	2.59	15.77	1.13	3.93	<.0001	0.000711463
6.6 Cardiovascular disease	Fluid shear stress and atherosclerosis	414.94	44.87	155.424	789.79	90.04	311.903	0.0027	0.00568255
1.11 Xenobiotics biodegradation and metabolism	Fluorobenzoate degradation	0.08	0.05	0.185	0.01	0.01	0.032	0.482	0.537025
4.3 Cellular community - eukaryotes	Focal adhesion	7.35	1.95	6.748	0.92	0.41	1.423	0.0018	0.0041358
1.8 Metabolism of cofactors and vitamins	Folate biosynthesis	498.84	36.96	128.038	832.89	53.47	185.219	0.0003	0.00155271
3.2 Signal transduction	FoxO signaling pathway	182.95	14.05	48.67	321.7	43.26	149.868	0.0094	0.0163113
1.1 Carbohydrate metabolism	Fructose and mannose metabolism	2539.75	133.72	463.236	3458.57	209.09	724.32	0.0015	0.00365102
1.11 Xenobiotics biodegradation and metabolism	Furfural degradation	0.01	0.01	0.046	0.01	0.01	0.023	0.952	0.95396
5.6 Nervous system	GABAergic synapse	88.72	7.16	24.805	116.19	7.06	24.455	0.0179	0.0292245
1.1 Carbohydrate metabolism	Galactose metabolism	835.72	72.24	250.252	1082.11	109.49	379.299	0.0433	0.0646291
4.3 Cellular community - eukaryotes	Gap junction	2258.12	534.98	1853.23	289.06	106.56	369.138	0.0002	0.00113736
5.4 Digestive system	Gastric acid secretion	9.31	2.83	9.806	1.14	0.49	1.702	0.0033	0.00643951
6.2 Cancer: specific types	Gastric cancer	5.6	1.66	5.741	0.66	0.29	1.003	0.001	0.0028079
1.9 Metabolism of terpenoids and polyketides	Geraniol degradation	0.68	0.23	0.793	0.84	0.29	1.021	0.7719	0.808243
6.2 Cancer: specific types	Glioma	9.58	2.87	9.955	1.18	0.5	1.733	0.0037	0.00718176
5.2 Endocrine system	Glucagon signaling pathway	732.33	35.04	121.369	883.23	45.7	158.305	0.0243	0.0383953
1.10 Biosynthesis of other secondary metabolites	Glucosinolate biosynthesis	125.88	10.05	34.808	346.13	31.36	108.633	<.0001	0.000644096
5.6 Nervous system	Glutamatergic synapse	87.55	7.03	24.359	115.56	7.12	24.664	0.0209	0.0335433
1.6 Metabolism of other amino acids	Glutathione metabolism	340.9	42.4	146.891	447.82	35.23	122.051	0.0243	0.0383953
1.3 Lipid metabolism	Glycerolipid metabolism	172.04	8.49	29.41	284.67	23.21	80.392	0.0007	0.00211103
1.3 Lipid metabolism	Glycerophospholipid metabolism	357.85	21.17	73.328	543.9	28.23	97.809	0.0003	0.0013197
1.5 Amino acid metabolism	Glycine, serine and threonine metabolism	1523.75	100.75	349.02	2076.06	86.37	299.202	0.0005	0.00182671
1.1 Carbohydrate metabolism	Glycolysis / Gluconeogenesis	8660.82	541.48	1875.75	13212.6	1162.47	4026.92	0.001	0.0028079
1.7 Glycan biosynthesis and metabolism	Glycosaminoglycan degradation	64.39	5.98	20.712	56.77	4.06	14.047	0.2482	0.304768
1.7 Glycan biosynthesis and metabolism	Glycosphingolipid biosynthesis - ganglio series	27.32	3.84	13.289	19.62	1.91	6.62	0.0647	0.0919143
1.7 Glycan biosynthesis and metabolism	Glycosphingolipid biosynthesis - globo and isoglobo series	75.13	6.38	22.102	62.99	4.5	15.584	0.1333	0.171863
1.7 Glycan biosynthesis and metabolism	Glycosylphosphatidylinositol (GPI)-anchor biosynthesis	0.82	0.28	0.957	0.1	0.05	0.19	0.0076	0.0133253
1.1 Carbohydrate metabolism	Glyoxylate and dicarboxylate metabolism	1298.15	88.07	305.09	1718.29	135.42	469.125	0.0179	0.0292245
5.2 Endocrine system	GnRH signaling pathway	11.1	3.19	11.045	1.32	0.54	1.87	0.0027	0.00568255
6.3 Immune disease	Graft-versus-host disease	0.02	0.01	0.034	0	0	0.007	0.104	0.136737
5.2 Endocrine system	Growth hormone synthesis, secretion and action	0.21	0.06	0.21	0.05	0.03	0.093	0.0287	0.0444032
3.2 Signal transduction	Hedgehog signaling pathway - fly	16.68	5.03	17.438	2.68	1.26	4.356	0.0064	0.0115357
6.9 Infectious disease: viral	Hepatitis B	8.3	2.64	9.152	1.42	1.01	3.505	0.0042	0.00787674
6.9 Infectious disease: viral	Hepatitis C	14.92	3.32	11.492	11.59	2.48	8.593	0.5254	0.57421
6.2 Cancer: specific types	Hepatocellular carcinoma	10.69	1.89	6.542	2.48	0.58	1.997	0.0005	0.00182671
6.9 Infectious disease: viral	Herpes simplex virus 1 infection	11.74	2.68	9.283	8.2	2.03	7.049	0.2987	0.361043
3.2 Signal transduction	HIF-1 signaling pathway	4210.96	329.87	1142.7	6844.18	766.03	2653.6	0.0047	0.00862678
3.2 Signal transduction	Hippo signaling pathway	15.94	4.03	13.958	2.21	1.06	3.657	0.001	0.0028079
3.2 Signal transduction	Hippo signaling pathway - fly	8.64	2.17	7.503	1.3	0.65	2.235	0.0015	0.00365102
3.2 Signal transduction	Hippo signaling pathway - multiple species	0.71	0.24	0.831	0.14	0.08	0.28	0.0168	0.0279573
1.5 Amino acid metabolism	Histidine metabolism	244.03	18.99	65.774	486.16	31	107.371	<.0001	0.000644096
2.4 Replication and repair	Homologous recombination	1224.32	59.79	207.121	1786.32	95.16	329.66	0.0005	0.00182671
6.9 Infectious disease: viral	Human cytomegalovirus infection	11.91	3.39	11.741	1.34	0.56	1.928	0.0017	0.0041358
6.9 Infectious disease: viral	Human immunodeficiency virus 1 infection	52.43	12.51	43.336	6.59	2.85	9.883	0.001	0.0028079
6.9 Infectious disease: viral	Human papillomavirus infection	91.78	15.58	53.956	112.83	11.9	41.226	0.2482	0.304768
6.9 Infectious disease: viral	Human T-cell leukemia virus 1 infection	25.77	5.84	20.226	7.36	3.44	11.928	0.0039	0.00743969
6.4 Neurodegenerative disease	Huntington disease	2557.19	571.22	1978.77	681.12	109.76	380.227	0.0022	0.00485261
6.6 Cardiovascular disease	Hypertrophic cardiomyopathy (HCM)	0.04	0.04	0.145	0.05	0.05	0.181	0.952	0.95396
5.1 Immune system	IL-17 signaling pathway	91.18	15.63	54.14	146.79	20.13	69.738	0.0433	0.0646291
5.7 Sensory system	Inflammatory mediator regulation of TRP channels	16.6	4.38	15.173	2.05	0.88	3.042	0.0004	0.00164638
6.9 Infectious disease: viral	Influenza A	8.48	2.12	7.345	10.79	2.24	7.754	0.4189	0.476664
1.1 Carbohydrate metabolism	Inositol phosphate metabolism	374.15	17.61	60.988	753.82	65.18	225.807	0.0001	0.000868017
6.7 Endocrine and metabolic disease	Insulin resistance	653.96	25.56	88.558	760.56	37.97	131.52	0.0377	0.0573128
5.2 Endocrine system	Insulin signaling pathway	662.39	30.66	106.22	728.9	37.71	130.639	0.1489	0.190062
1.10 Biosynthesis of other secondary metabolites	Isoquinoline alkaloid biosynthesis	27.35	1.92	6.666	48.32	5.73	19.849	0.0007	0.00211103
3.2 Signal transduction	Jak-STAT signaling pathway	0.13	0.04	0.153	0.03	0.02	0.065	0.1012	0.136297
6.9 Infectious disease: viral	Kaposi sarcoma-associated herpesvirus infection	12.58	3.72	12.9	1.41	0.58	1.994	0.0021	0.00477492
6.8 Infectious disease: bacterial	Legionellosis	3546.04	262.1	907.944	4797.28	557.84	1932.42	0.0647	0.0919143
6.10 Infectious disease: parasitic	Leishmaniasis	59.13	14.37	49.795	8.31	2.38	8.237	0.0015	0.00365102
1.9 Metabolism of terpenoids and polyketides	Limonene and pinene degradation	0.8	0.25	0.877	0.99	0.28	0.955	0.4519	0.512722
1.3 Lipid metabolism	Linoleic acid metabolism	0.44	0.16	0.541	0.47	0.18	0.613	0.8151	0.838985
1.7 Glycan biosynthesis and metabolism	Lipoarabinomannan (LAM) biosynthesis	0.3	0.09	0.298	0.23	0.08	0.267	0.483	0.537025
1.8 Metabolism of cofactors and vitamins	Lipoic acid metabolism	3.2	0.66	2.274	4.05	0.97	3.346	0.5254	0.57421
1.7 Glycan biosynthesis and metabolism	Lipopolysaccharide biosynthesis	523.01	43.71	151.419	1088.16	79.22	274.412	<.0001	0.000744759
5.9 Aging	Longevity regulating pathway	84.54	11.43	39.596	206.49	44.64	154.621	0.0209	0.0335433
5.9 Aging	Longevity regulating pathway - multiple species	93.17	12.72	44.059	311.88	54.87	190.075	0.0022	0.00485261
5.9 Aging	Longevity regulating pathway - worm	551.17	54.67	189.392	1183.26	133.63	462.897	0.001	0.0028079
5.6 Nervous system	Long-term depression	7.7	1.91	6.626	1.1	0.56	1.928	0.0009	0.0028079
5.6 Nervous system	Long-term potentiation	19.08	5	17.319	2.21	0.94	3.267	0.0004	0.00164638
1.5 Amino acid metabolism	Lysine biosynthesis	296.42	16.13	55.886	773.49	75.8	262.584	<.0001	0.000644096
1.5 Amino acid metabolism	Lysine degradation	232.46	39.28	136.056	521.41	114.69	397.3	0.0179	0.0292245
4.1 Transport and catabolism	Lysosome	345.53	68.57	237.537	86.84	10.8	37.406	0.0001	0.00096085
1.7 Glycan biosynthesis and metabolism	Mannose type O-glycan biosynthesis	0.6	0.14	0.476	0.46	0.17	0.59	0.2976	0.361043
3.2 Signal transduction	MAPK signaling pathway	2.68	0.76	2.624	0.2	0.09	0.303	0.0074	0.0131903
3.2 Signal transduction	MAPK signaling pathway - fly	160.96	26.54	91.935	213.36	44.67	154.744	0.6442	0.690433
3.2 Signal transduction	MAPK signaling pathway - plant	127.23	12.95	44.862	120.92	14.33	49.63	0.3263	0.38025
3.2 Signal transduction	MAPK signaling pathway - yeast	0.01	0.01	0.032	0.06	0.06	0.201	0.5468	0.595904
6.9 Infectious disease: viral	Measles	9.4	2.11	7.295	8.18	1.9	6.578	0.8174	0.838985
4.2 Cell growth and death	Meiosis - yeast	35.24	6.89	23.873	24.91	4.08	14.121	0.4884	0.538375
5.2 Endocrine system	Melanogenesis	9.31	2.83	9.806	1.14	0.49	1.702	0.0033	0.00643951
6.2 Cancer: specific types	Melanoma	0.06	0.03	0.11	0.01	0.01	0.042	0.4644	0.522246
1.0 Global and overview maps	Metabolic pathways	32240	1595.71	5527.7	56236.2	3760.3	13026	<.0001	0.000644096
1.11 Xenobiotics biodegradation and metabolism	Metabolism of xenobiotics by cytochrome P450	10.36	1.49	5.173	11.31	2.91	10.069	0.8174	0.838985
1.2 Energy metabolism	Methane metabolism	2943.18	170.52	590.682	3869.3	285.25	988.135	0.013	0.0219069
1.0 Global and overview maps	Microbial metabolism in diverse environments	16263.9	915.53	3171.5	24334.2	1819.52	6303.01	0.0007	0.00211103
6.1 Cancer: overview	MicroRNAs in cancer	27.2	3.11	10.769	49.96	6.8	23.546	0.0056	0.0101711
5.4 Digestive system	Mineral absorption	0.4	0.4	1.379	1.25	1.17	4.042	0.0442	0.0656525
2.4 Replication and repair	Mismatch repair	989.73	46.47	160.96	1573.93	85.75	297.055	0.0002	0.00113736
4.1 Transport and catabolism	Mitophagy - animal	5.57	1.48	5.139	0.93	0.37	1.285	0.0127	0.0216222
4.1 Transport and catabolism	Mitophagy - yeast	3.35	1.01	3.493	0.6	0.21	0.72	0.0713	0.0998717
1.10 Biosynthesis of other secondary metabolites	Monobactam biosynthesis	176.11	10.8	37.41	460.7	47.13	163.246	<.0001	0.000744759
2.2 Translation	mRNA surveillance pathway	31.52	7.97	27.6	5.47	2.49	8.617	0.0012	0.00327601
3.2 Signal transduction	mTOR signaling pathway	20.05	4.24	14.704	6.22	1.53	5.309	0.0032	0.00643951
1.11 Xenobiotics biodegradation and metabolism	Naphthalene degradation	11.69	0.97	3.362	12.28	1.28	4.451	0.6442	0.690433
5.1 Immune system	Natural killer cell mediated cytotoxicity	2.49	0.7	2.441	0.17	0.09	0.299	0.0033	0.00643951
4.2 Cell growth and death	Necroptosis	725.87	42.83	148.353	827.74	50.27	174.129	0.1333	0.171863
1.10 Biosynthesis of other secondary metabolites	Neomycin, kanamycin and gentamicin biosynthesis	59.3	3.29	11.408	96.39	14.02	48.568	0.0496	0.0732438
3.3 Signaling molecules and interaction	Neuroactive ligand-receptor interaction	0	0	0	0.22	0.12	0.425	0.0706	0.0992852
5.6 Nervous system	Neurotrophin signaling pathway	9.31	2.83	9.806	1.14	0.49	1.702	0.0033	0.00643951
3.2 Signal transduction	NF-kappa B signaling pathway	3.24	0.85	2.95	0.58	0.19	0.662	0.0139	0.023295
1.7 Glycan biosynthesis and metabolism	N-Glycan biosynthesis	70.36	4.95	17.159	53.25	4.26	14.749	0.0056	0.0101711
1.8 Metabolism of cofactors and vitamins	Nicotinate and nicotinamide metabolism	420.67	21.96	76.076	974.04	99.35	344.165	0.0002	0.00104394
1.2 Energy metabolism	Nitrogen metabolism	569.84	56.81	196.802	1152.43	141.78	491.154	0.0003	0.0013197
1.11 Xenobiotics biodegradation and metabolism	Nitrotoluene degradation	5.51	0.83	2.871	12.75	2.47	8.566	0.0067	0.0118478
5.1 Immune system	NOD-like receptor signaling pathway	3636.81	296.92	1028.56	4618.86	575.7	1994.27	0.1659	0.209617
6.7 Endocrine and metabolic disease	Non-alcoholic fatty liver disease (NAFLD)	5.72	1.07	3.703	8.58	1.96	6.789	0.3865	0.446288
2.4 Replication and repair	Non-homologous end-joining	0.46	0.15	0.509	0.22	0.09	0.305	0.4185	0.476664
1.9 Metabolism of terpenoids and polyketides	Nonribosomal peptide structures	0.99	0.38	1.307	1.3	0.46	1.594	0.4695	0.526513
6.2 Cancer: specific types	Non-small cell lung cancer	0.01	0.01	0.025	0	0	0	0.3173	0.376503
3.2 Signal transduction	Notch signaling pathway	0.19	0.08	0.287	0.02	0.02	0.056	0.104	0.136737
1.10 Biosynthesis of other secondary metabolites	Novobiocin biosynthesis	43.38	3.26	11.288	115.2	12.5	43.291	<.0001	0.000644096
2.4 Replication and repair	Nucleotide excision repair	292.96	23.96	83.009	273.7	13.14	45.529	0.4189	0.476664
5.7 Sensory system	Olfactory transduction	9.31	2.83	9.806	1.14	0.49	1.702	0.0033	0.00643951
1.8 Metabolism of cofactors and vitamins	One carbon pool by folate	778.65	53.37	184.882	1105.57	47.32	163.905	0.0007	0.00211103
4.2 Cell growth and death	Oocyte meiosis	50.92	12.99	45.006	7.31	3.38	11.724	0.0007	0.00211103
5.8 Development and regeneration	Osteoclast differentiation	2.47	0.7	2.414	0.17	0.08	0.294	0.0033	0.00643951
1.7 Glycan biosynthesis and metabolism	Other glycan degradation	186.13	15.98	55.372	171.11	11.45	39.651	0.2987	0.361043
1.7 Glycan biosynthesis and metabolism	Other types of O-glycan biosynthesis	0.31	0.12	0.422	0.53	0.15	0.511	0.0826	0.11364
1.2 Energy metabolism	Oxidative phosphorylation	2880.88	201.98	699.663	5836	755.92	2618.59	<.0001	0.000711463
5.2 Endocrine system	Oxytocin signaling pathway	61.83	15.08	52.235	8.07	3.8	13.148	0.0007	0.00211103
4.2 Cell growth and death	p53 signaling pathway	0.05	0.03	0.1	0.01	0.01	0.042	0.4644	0.522246
6.2 Cancer: specific types	Pancreatic cancer	2.03	0.56	1.925	0.23	0.11	0.368	0.003	0.00633822
5.4 Digestive system	Pancreatic secretion	98.88	20.39	70.641	164.89	29.22	101.234	0.0735	0.101471
1.8 Metabolism of cofactors and vitamins	Pantothenate and CoA biosynthesis	702.95	35.56	123.196	1849.79	147.52	511.031	<.0001	0.000644096
5.2 Endocrine system	Parathyroid hormone synthesis, secretion and action	2.02	0.57	1.973	0.24	0.1	0.341	0.0062	0.0113296
6.4 Neurodegenerative disease	Parkinson disease	1.08	0.28	0.957	1.46	0.67	2.328	0.814	0.838985
6.8 Infectious disease: bacterial	Pathogenic Escherichia coli infection	5283.66	630.49	2184.08	5519.95	621.63	2153.39	0.729	0.768656
6.1 Cancer: overview	Pathways in cancer	131.5	24.05	83.322	157.79	20.07	69.541	0.2727	0.333725
6.1 Cancer: overview	PD-L1 expression and PD-1 checkpoint pathway in cancer	5.69	1.59	5.525	0.78	0.27	0.943	0.0237	0.0378852
1.10 Biosynthesis of other secondary metabolites	Penicillin and cephalosporin biosynthesis	20.85	1.73	5.998	17.61	1.49	5.156	0.2987	0.361043
1.1 Carbohydrate metabolism	Pentose and glucuronate interconversions	1066.54	65.15	225.7	1164.74	101.81	352.677	0.7728	0.808243
1.1 Carbohydrate metabolism	Pentose phosphate pathway	2740.27	159.97	554.16	3629.66	260.49	902.348	0.0327	0.0500926
1.7 Glycan biosynthesis and metabolism	Peptidoglycan biosynthesis	465.98	31.53	109.214	933.18	55.99	193.942	<.0001	0.000644096
4.1 Transport and catabolism	Peroxisome	151.7	12.22	42.316	347.77	47.82	165.646	0.0004	0.00164638
6.8 Infectious disease: bacterial	Pertussis	31.84	5.97	20.694	10.36	1.42	4.919	0.0209	0.0335433
4.1 Transport and catabolism	Phagosome	2296.87	542.62	1879.68	295.84	108.28	375.086	0.0002	0.00113736
1.10 Biosynthesis of other secondary metabolites	Phenazine biosynthesis	8.23	0.95	3.274	27.34	4.36	15.111	0.0003	0.0013197
1.5 Amino acid metabolism	Phenylalanine metabolism	181.35	11.88	41.14	304.32	18.89	65.442	<.0001	0.000644096
1.5 Amino acid metabolism	Phenylalanine, tyrosine and tryptophan biosynthesis	273.55	19.6	67.913	735.76	73.44	254.414	<.0001	0.000644096
1.10 Biosynthesis of other secondary metabolites	Phenylpropanoid biosynthesis	128.57	8.93	30.934	169.09	11.32	39.2	0.0179	0.0292245
3.2 Signal transduction	Phosphatidylinositol signaling system	72.42	3.28	11.365	114.27	8.15	28.219	0.0004	0.00164638
3.2 Signal transduction	Phospholipase D signaling pathway	2.74	0.59	2.051	2.64	0.71	2.442	0.9081	0.922335
1.6 Metabolism of other amino acids	Phosphonate and phosphinate metabolism	66.67	6.08	21.059	87.86	7.21	24.977	0.0433	0.0646291
3.1 Membrane transport	Phosphotransferase system (PTS)	53.27	3.85	13.334	145.93	18.07	62.605	0.0004	0.00164638
1.2 Energy metabolism	Photosynthesis	1231.87	102.45	354.904	2831.3	330.9	1146.29	<.0001	0.000644096
1.2 Energy metabolism	Photosynthesis - antenna proteins	0.26	0.09	0.303	0.8	0.57	1.987	0.9018	0.920778
5.7 Sensory system	Phototransduction	9.31	2.83	9.806	1.14	0.49	1.702	0.0033	0.00643951
5.7 Sensory system	Phototransduction - fly	9.31	2.83	9.806	1.14	0.49	1.702	0.0033	0.00643951
3.2 Signal transduction	PI3K-Akt signaling pathway	216.16	25.2	87.297	269.85	21.23	73.554	0.1489	0.190062
3.2 Signal transduction	Plant hormone signal transduction	0.03	0.03	0.091	6.91	1.91	6.631	0.0023	0.00493173
5.10 Environmental adaptation	Plant-pathogen interaction	6902.99	304.59	1055.13	9933.35	813.96	2819.65	0.0018	0.0041358
5.1 Immune system	Platelet activation	7.3	1.94	6.729	0.91	0.41	1.431	0.0018	0.0041358
6.12 Drug resistance: antineoplastic	Platinum drug resistance	8.63	1.63	5.648	7.92	1.06	3.667	0.8174	0.838985
1.9 Metabolism of terpenoids and polyketides	Polyketide sugar unit biosynthesis	199.58	10.46	36.236	509.31	48.49	167.97	<.0001	0.000644096
1.8 Metabolism of cofactors and vitamins	Porphyrin and chlorophyll metabolism	191.52	12.71	44.027	342.05	22.53	78.049	<.0001	0.000644096
5.2 Endocrine system	PPAR signaling pathway	279.74	44.7	154.84	218.32	18.04	62.48	0.4884	0.538375
1.3 Lipid metabolism	Primary bile acid biosynthesis	3.99	0.55	1.904	3.17	0.45	1.545	0.2482	0.304768
6.3 Immune disease	Primary immunodeficiency	47.29	2.91	10.09	61.56	4.47	15.483	0.0282	0.0438291
6.4 Neurodegenerative disease	Prion diseases	0.26	0.11	0.369	0.16	0.08	0.285	0.5711	0.620744
1.10 Biosynthesis of other secondary metabolites	Prodigiosin biosynthesis	156.37	10.24	35.467	474.73	46.28	160.322	<.0001	0.000644096
5.2 Endocrine system	Progesterone-mediated oocyte maturation	92.18	15.95	55.247	146.85	20.15	69.809	0.0567	0.0827736
5.2 Endocrine system	Prolactin signaling pathway	0.09	0.09	0.299	0	0	0.011	0.952	0.95396
1.1 Carbohydrate metabolism	Propanoate metabolism	789.88	51.05	176.838	1474.58	130.57	452.305	<.0001	0.000744759
6.2 Cancer: specific types	Prostate cancer	90.66	15.53	53.782	146.69	20.14	69.781	0.0433	0.0646291
2.3 Folding, sorting and degradation	Proteasome	32.74	7.42	25.695	6.4	1.84	6.358	0.0018	0.0041358
5.4 Digestive system	Protein digestion and absorption	7.58	0.86	2.98	14.4	1.04	3.597	0.0002	0.00113736
2.3 Folding, sorting and degradation	Protein export	3515.17	236.41	818.958	6438.03	532.61	1845	0.0002	0.00104394
2.3 Folding, sorting and degradation	Protein processing in endoplasmic reticulum	392.62	80.56	279.056	984.59	176.18	610.296	0.0047	0.00862678
6.1 Cancer: overview	Proteoglycans in cancer	39.71	3.5	12.128	68.49	7.69	26.622	0.0005	0.00182671
5.5 Excretory system	Proximal tubule bicarbonate reclamation	102.07	12.28	42.545	116.63	15.65	54.221	0.3556	0.413105
1.4 Nucleotide metabolism	Purine metabolism	2077.68	94.69	328.017	3667.35	249.81	865.353	0.0001	0.00096085
1.4 Nucleotide metabolism	Pyrimidine metabolism	1232.46	55.31	191.601	1972.69	125.35	434.231	0.0003	0.00155271
1.1 Carbohydrate metabolism	Pyruvate metabolism	5232.33	334.83	1159.88	6734.53	476.44	1650.42	0.0282	0.0438291
4.4 Cellular community - prokaryotes	Quorum sensing	3414.64	222.93	772.257	6822.16	597.09	2068.4	0.0001	0.000868017
3.2 Signal transduction	Rap1 signaling pathway	49.93	13.03	45.148	3.29	1.55	5.381	0.0002	0.00113736
3.2 Signal transduction	Ras signaling pathway	11.1	3.19	11.045	1.32	0.54	1.87	0.0027	0.00568255
4.5 Cell motility	Regulation of actin cytoskeleton	77.47	18.83	65.217	6.5	3.08	10.678	0.0003	0.0013197
5.2 Endocrine system	Regulation of lipolysis in adipocytes	0.01	0.01	0.02	0.01	0.01	0.022	0.952	0.95396
6.2 Cancer: specific types	Renal cell carcinoma	0.93	0.23	0.805	4.21	1.35	4.677	0.0015	0.00365102
5.2 Endocrine system	Renin secretion	182.81	43.2	149.64	17.32	6.9	23.896	0.0002	0.00113736
5.2 Endocrine system	Renin-angiotensin system	3.37	0.45	1.546	2.87	0.32	1.113	0.1842	0.230559
1.8 Metabolism of cofactors and vitamins	Retinol metabolism	1.65	0.27	0.927	4.49	0.8	2.777	0.0008	0.00246173
5.6 Nervous system	Retrograde endocannabinoid signaling	3.44	0.31	1.06	6.17	0.81	2.801	0.0067	0.0118478
6.3 Immune disease	Rheumatoid arthritis	24.41	5.72	19.802	2.39	1.01	3.482	0.0002	0.00104394
1.8 Metabolism of cofactors and vitamins	Riboflavin metabolism	297.25	21.08	73.016	605.69	31.56	109.325	<.0001	0.000644096
2.2 Translation	Ribosome	43198.6	3024.78	10478.1	143670	20955.3	72591.5	<.0001	0.000744759
2.2 Translation	Ribosome biogenesis in eukaryotes	55.43	6.19	21.455	126.75	14.72	50.983	0.0008	0.00246173
5.1 Immune system	RIG-I-like receptor signaling pathway	1.13	0.31	1.079	0.23	0.1	0.351	0.0127	0.0216949
2.3 Folding, sorting and degradation	RNA degradation	1941.1	173.5	601.005	2939.12	177.11	613.531	0.0008	0.00246173
2.1 Transcription	RNA polymerase	1609.96	163.5	566.385	4122.22	301.41	1044.12	<.0001	0.000644096
2.2 Translation	RNA transport	163.99	16.93	58.632	140.23	10.49	36.348	0.8625	0.882972
5.4 Digestive system	Salivary secretion	9.31	2.83	9.806	1.14	0.49	1.702	0.0033	0.00643951
6.8 Infectious disease: bacterial	Salmonella infection	7312.56	489.34	1695.13	10011.4	921.5	3192.18	0.0282	0.0438291
1.3 Lipid metabolism	Secondary bile acid biosynthesis	3.99	0.55	1.904	3.12	0.45	1.575	0.2253	0.279342
1.6 Metabolism of other amino acids	Selenocompound metabolism	152.25	11.25	38.986	273.55	15.73	54.479	<.0001	0.000744759
1.9 Metabolism of terpenoids and polyketides	Sesquiterpenoid and triterpenoid biosynthesis	0.82	0.19	0.647	22.13	4.85	16.817	0.0015	0.00365102
6.8 Infectious disease: bacterial	Shigellosis	3372.93	265.14	918.473	4021.13	568.07	1967.84	0.6442	0.690433
6.2 Cancer: specific types	Small cell lung cancer	1.84	0.62	2.154	0.49	0.33	1.139	0.0686	0.0967235
2.3 Folding, sorting and degradation	SNARE interactions in vesicular transport	0.7	0.34	1.165	0.12	0.06	0.205	0.1758	0.2215
1.3 Lipid metabolism	Sphingolipid metabolism	139.59	8.12	28.145	128.15	8.26	28.623	0.4189	0.476664
3.2 Signal transduction	Sphingolipid signaling pathway	27.19	6.15	21.302	4.78	2.17	7.508	0.001	0.0028079
6.4 Neurodegenerative disease	Spinocerebellar ataxia	32.62	4.48	15.52	32.73	3.99	13.838	0.9081	0.922335
2.1 Transcription	Spliceosome	7.84	1.73	5.994	5.98	0.75	2.613	0.729	0.768656
6.8 Infectious disease: bacterial	Staphylococcus aureus infection	0.05	0.03	0.112	0.03	0.02	0.079	0.9292	0.941289
1.1 Carbohydrate metabolism	Starch and sucrose metabolism	1580.95	130.96	453.675	2184.09	200.05	692.98	0.0079	0.0138278
1.3 Lipid metabolism	Steroid biosynthesis	10.13	3.11	10.761	22.97	4.7	16.265	0.0735	0.101471
1.3 Lipid metabolism	Steroid hormone biosynthesis	0.36	0.07	0.246	0.19	0.03	0.105	0.0605	0.0876562
1.10 Biosynthesis of other secondary metabolites	Stilbenoid, diarylheptanoid and gingerol biosynthesis	9.15	0.75	2.59	15.77	1.13	3.93	<.0001	0.000711463
1.10 Biosynthesis of other secondary metabolites	Streptomycin biosynthesis	477.39	42.67	147.827	986.41	99.97	346.323	0.0004	0.00164638
1.11 Xenobiotics biodegradation and metabolism	Styrene degradation	4.73	0.41	1.406	4.28	0.57	1.98	0.4884	0.538375
1.2 Energy metabolism	Sulfur metabolism	98.04	7.04	24.399	191.71	13.68	47.38	<.0001	0.000744759
2.3 Folding, sorting and degradation	Sulfur relay system	18.17	2.47	8.566	94.64	16.4	56.816	0.0008	0.00246173
5.6 Nervous system	Synaptic vesicle cycle	49.78	12.45	43.142	7.13	3.36	11.633	0.0008	0.00246173
1.3 Lipid metabolism	Synthesis and degradation of ketone bodies	17.53	2.21	7.645	23.06	2.78	9.619	0.1489	0.190062
6.3 Immune disease	Systemic lupus erythematosus	218.39	50.65	175.464	53.23	24.23	83.937	0.0015	0.00365102
5.1 Immune system	T cell receptor signaling pathway	2.49	0.69	2.401	0.17	0.08	0.29	0.0042	0.00787674
1.6 Metabolism of other amino acids	Taurine and hypotaurine metabolism	358.81	25.28	87.565	426.64	27.82	96.367	0.1659	0.209617
1.9 Metabolism of terpenoids and polyketides	Terpenoid backbone biosynthesis	339.35	17.84	61.811	653.96	58.08	201.198	0.0002	0.00113736
3.2 Signal transduction	TGF-beta signaling pathway	24.24	6.87	23.787	3.77	1.8	6.232	0.0012	0.00327601
5.1 Immune system	Th1 and Th2 cell differentiation	2.47	0.7	2.414	0.17	0.08	0.294	0.0033	0.00643951
5.1 Immune system	Th17 cell differentiation	93.08	16.17	56.031	146.84	20.14	69.778	0.0735	0.101471
5.10 Environmental adaptation	Thermogenesis	52.46	3.58	12.411	66.68	4.41	15.286	0.0567	0.0827736
1.8 Metabolism of cofactors and vitamins	Thiamine metabolism	333.78	15.56	53.904	587.54	30.92	107.122	<.0001	0.000644096
6.2 Cancer: specific types	Thyroid cancer	0.01	0.01	0.025	0	0	0	0.3173	0.376503
5.2 Endocrine system	Thyroid hormone signaling pathway	0.15	0.05	0.181	0.07	0.03	0.116	0.3083	0.371537
5.2 Endocrine system	Thyroid hormone synthesis	165.22	35.96	124.559	173.33	19.43	67.292	0.204	0.254538
4.3 Cellular community - eukaryotes	Tight junction	1197.88	270.71	937.763	170.73	62.51	216.531	0.0005	0.00182671
5.1 Immune system	Toll and Imd signaling pathway	48.56	12.75	44.151	6.31	2.33	8.056	0.0012	0.00327601
1.11 Xenobiotics biodegradation and metabolism	Toluene degradation	0.09	0.05	0.185	0.04	0.02	0.065	0.7327	0.770433
6.10 Infectious disease: parasitic	Toxoplasmosis	8.23	2.32	8.047	1.48	0.65	2.247	0.0079	0.0138278
6.1 Cancer: overview	Transcriptional misregulation in cancer	93.49	21.71	75.221	21.27	9.51	32.946	0.0018	0.0041358
1.10 Biosynthesis of other secondary metabolites	Tropane, piperidine and pyridine alkaloid biosynthesis	39.9	3.28	11.358	94.77	9.7	33.615	<.0001	0.000711463
1.5 Amino acid metabolism	Tryptophan metabolism	50.93	3.83	13.282	102.67	18.65	64.61	0.0027	0.00568255
6.8 Infectious disease: bacterial	Tuberculosis	281.24	38.86	134.625	729.46	90.1	312.108	0.0004	0.00164638
3.2 Signal transduction	Two-component system	4754.91	307.97	1066.86	18649.4	2894.33	10026.3	0.0003	0.00155271
6.7 Endocrine and metabolic disease	Type I diabetes mellitus	198.77	26.83	92.935	440.7	54.08	187.35	0.0007	0.00211103
6.7 Endocrine and metabolic disease	Type II diabetes mellitus	41.25	4.25	14.713	109.26	11.82	40.929	0.0003	0.0013197
1.5 Amino acid metabolism	Tyrosine metabolism	52.3	3.75	12.976	107.72	9.73	33.697	0.0001	0.000868017
1.8 Metabolism of cofactors and vitamins	Ubiquinone and other terpenoid-quinone biosynthesis	59.89	5.09	17.646	126.53	9.7	33.605	0.0001	0.000868017
2.3 Folding, sorting and degradation	Ubiquitin mediated proteolysis	74.48	18.72	64.855	11.87	4.58	15.87	0.001	0.0028079
1.5 Amino acid metabolism	Valine, leucine and isoleucine biosynthesis	498.3	35.53	123.097	1618.86	172.72	598.322	<.0001	0.000644096
1.5 Amino acid metabolism	Valine, leucine and isoleucine degradation	445.08	33.21	115.059	709.55	52.07	180.386	0.0005	0.00182671
6.11 Drug resistance: antimicrobial	Vancomycin resistance	195.6	13.06	45.247	322.57	13.93	48.258	<.0001	0.000644096
1.7 Glycan biosynthesis and metabolism	Various types of N-glycan biosynthesis	43.53	5	17.324	22.21	2	6.926	0.0004	0.00164638
5.3 Circulatory system	Vascular smooth muscle contraction	16.6	4.38	15.173	2.05	0.88	3.042	0.0004	0.00164638
5.5 Excretory system	Vasopressin-regulated water reabsorption	10.27	2.39	8.293	1.35	0.66	2.291	0.0008	0.00246173
3.2 Signal transduction	VEGF signaling pathway	2.47	0.7	2.414	0.17	0.08	0.294	0.0033	0.00643951
6.8 Infectious disease: bacterial	Vibrio cholerae infection	39.68	8.81	30.501	7.09	2.44	8.456	0.001	0.0028079
6.1 Cancer: overview	Viral carcinogenesis	126.82	24.23	83.93	127.71	14.2	49.204	0.6442	0.690433
6.6 Cardiovascular disease	Viral myocarditis	0.02	0.01	0.034	0	0	0.007	0.104	0.136737
1.8 Metabolism of cofactors and vitamins	Vitamin B6 metabolism	380.54	22.18	76.823	639.22	27.87	96.536	<.0001	0.000644096
5.4 Digestive system	Vitamin digestion and absorption	0.96	0.27	0.921	0.11	0.07	0.257	0.0109	0.0188316
3.2 Signal transduction	Wnt signaling pathway	23.64	6.79	23.512	3.83	1.72	5.974	0.0022	0.00485261
1.11 Xenobiotics biodegradation and metabolism	Xylene degradation	6.27	0.78	2.701	9.28	1.68	5.833	0.3263	0.38025
6.8 Infectious disease: bacterial	Yersinia infection	5.48	1.16	4.023	1.13	0.39	1.352	0.0022	0.00485261
1.9 Metabolism of terpenoids and polyketides	Zeatin biosynthesis	26.3	2.31	7.992	43.44	1.87	6.47	0.0002	0.00104394
