# Supplementary material for: Distinct microbial hydrogen and reductant disposal pathways explain interbreed variations in ruminant methane yield
Source: Research Square preprint supplement (doi:10.21203/rs.3.rs-2831003/v1), 2024-04-11
Supplement: Supplementary file 8 [file 6d8f51692e58e4f7b7270866.xlsx]

## Sheet: Info
Cow number	Breed	Sample ID	16S bacteria-NCBI BioProject Accession	16S bacteria-NCBI SRA Accession	16S archaea-NCBI BioProject Accession	16S archaea-NCBI SRA Accession	Metagenome-NCBI BioProject Accession	Metagenome-NCBI SRA Accession	Metatranscriptome-NCBI BioProject Accession	Metatranscriptome-SRA BioSample Accession
45421	Jersey	145	PRJNA868624	SRR21073098	PRJNA868624	SRR21073081	PRJNA869873	SRR21118933	PRJNA870639	SRR21134560
45434	Jersey	152	PRJNA868624	SRR21073097	PRJNA868624	SRR21073080	PRJNA869873	SRR21118932	PRJNA870639	SRR21134559
45472	Jersey	118	PRJNA868624	SRR21073086	PRJNA868624	SRR21073079	PRJNA869873	SRR21118921	PRJNA870639	SRR21134548
47351	Jersey	147	PRJNA868624	SRR21073075	PRJNA868624	SRR21073078	PRJNA869873	SRR21118916	PRJNA870639	SRR21134543
47770	Jersey	121	PRJNA868624	SRR21073064	PRJNA868624	SRR21073077	PRJNA869873	SRR21118915	PRJNA870639	SRR21134542
48166	Jersey	151	PRJNA868624	SRR21073055	PRJNA868624	SRR21073076	PRJNA869873	SRR21118914	PRJNA870639	SRR21134541
48334	Jersey	135	PRJNA868624	SRR21073054	PRJNA868624	SRR21073074	PRJNA869873	SRR21118913	PRJNA870639	SRR21134540
48655	Jersey	136	PRJNA868624	SRR21073053	PRJNA868624	SRR21073073	PRJNA869873	SRR21118912	PRJNA870639	SRR21134539
48839	Jersey	150	PRJNA868624	SRR21073052	PRJNA868624	SRR21073072	PRJNA869873	SRR21118911	PRJNA870639	SRR21134538
49285	Jersey	146	PRJNA868624	SRR21073051	PRJNA868624	SRR21073071	PRJNA869873	SRR21118910	PRJNA870639	SRR21134537
49652	Jersey	141	PRJNA868624	SRR21073096	PRJNA868624	SRR21073070	PRJNA869873	SRR21118931	PRJNA870639	SRR21134558
49670	Jersey	137	PRJNA868624	SRR21073095	PRJNA868624	SRR21073069	PRJNA869873	SRR21118930	PRJNA870639	SRR21134557
17365	Holstein	127	PRJNA868624	SRR21073094	PRJNA868624	SRR21073068	PRJNA869873	SRR21118929	PRJNA870639	SRR21134556
17270	Holstein	134	PRJNA868624	SRR21073093	PRJNA868624	SRR21073067	PRJNA869873	SRR21118928	PRJNA870639	SRR21134555
31447	Holstein	133	PRJNA868624	SRR21073092	PRJNA868624	SRR21073066	PRJNA869873	SRR21118927	PRJNA870639	SRR21134554
30889	Holstein	143	PRJNA868624	SRR21073091	PRJNA868624	SRR21073065	PRJNA869873	SRR21118926	PRJNA870639	SRR21134553
19334	Holstein	140	PRJNA868624	SRR21073090	PRJNA868624	SRR21073063	PRJNA869873	SRR21118925	PRJNA870639	SRR21134552
30662	Holstein	122	PRJNA868624	SRR21073089	PRJNA868624	SRR21073062	PRJNA869873	SRR21118924	PRJNA870639	SRR21134551
29292	Holstein	125	PRJNA868624	SRR21073088	PRJNA868624	SRR21073061	PRJNA869873	SRR21118923	PRJNA870639	SRR21134550
31260	Holstein	117	PRJNA868624	SRR21073087	PRJNA868624	SRR21073060	PRJNA869873	SRR21118922	PRJNA870639	SRR21134549
19707	Holstein	149	PRJNA868624	SRR21073085	PRJNA868624	SRR21073059	PRJNA869873	SRR21118920	PRJNA870639	SRR21134547
19627	Holstein	132	PRJNA868624	SRR21073084	PRJNA868624	SRR21073058	PRJNA869873	SRR21118919	PRJNA870639	SRR21134546
18227	Holstein	130	PRJNA868624	SRR21073083	PRJNA868624	SRR21073057	PRJNA869873	SRR21118918	PRJNA870639	SRR21134545
31408	Holstein	142	PRJNA868624	SRR21073082	PRJNA868624	SRR21073056	PRJNA869873	SRR21118917	PRJNA870639	SRR21134544

## Sheet: Genes
Gene name	Full name	Pathway	KO	EC	Reaction	Reference		Gene name	Function
PaaH	Acetoacetyl-CoA reductase	Butyrate production	K00074	EC:1.1.1.157	Acetoacetyl-CoA + NADPH + H+ <=> (S)-3-Hydroxybutanoyl-CoA + NADP+	This study		FeFeA3	Bifurcating hydrogenases	[3]
ACADS	Acyl-CoA dehydrogenase	Propionate and Butyrate production	K00248	EC:1.3.8.1	Reduced electron-transferring flavoprotein + Propenoyl-CoA <=> Electron-transferring flavoprotein + Propanoyl-CoA or FADH2 + Crotonoyl-CoA <=> Butanoyl-CoA + FAD	This study		FeFeA4	Bifurcating hydrogenases	[3]
FabV	Crotonoyl-CoA reductase	Butyrate production	K00209	EC:1.3.1.9 1.3.1.44	Crotonoyl-CoA + NADH + H+ <=> Butanoyl-CoA + NAD+	This study		FeFeA4	Bifurcating hydrogenases	[3]
LDH	Lactate dehydrogenase	Propionate production	K00016	EC:1.1.1.27	Pyruvate + NADH + H+ <=> (S)-Lactate + NAD+	This study		NiFe4c	Energy-converting hydrogenases	[3]
Mdh	Oxalocetate reductase	Propionate production	K00024	EC:1.1.1.37	Oxaloacetate + NADH + H+ <=> (S)-Malate + NAD+	This study		NiFe4d	Energy-converting hydrogenases	[3]
GdhA	Glutamate dehydrogenase	Glutamate synthase	K00262	EC:1.4.1.4	2-Oxoglutarate + Ammonia + NAD(P)H + H+ <=> L-Glutamate + NADP+ + H2O	This study		NiFe4e	Energy-converting hydrogenases	[3]
GltB	Glutamate synthase (NADPH) large chain	Glutamate synthase	K00265	EC:1.4.1.13	L-Glutamine + 2-Oxoglutarate + NADPH + H+ <=> 2 L-Glutamate + NADP+ or 2-Oxoglutarate + Ammonia + NADPH + H+ <=> L-Glutamate + NADP+ + H2O	This study		NiFe4f	Energy-converting hydrogenases	[3]
GltD	Glutamate synthase (NADPH) small chain	Glutamate synthase	K00266	EC:1.4.1.13	L-Glutamine + 2-Oxoglutarate + NADPH + H+ <=> 2 L-Glutamate + NADP+ or 2-Oxoglutarate + Ammonia + NADPH + H+ <=> L-Glutamate + NADP+ + H2O	This study		NiFe4g	Energy-converting hydrogenases	[3]
sdhA, FrdA	Fumarate reductase	Propionate production	K00234	EC:1.3.5.1	Hydroquinone + Fumarate <=> Quinone + Succinate	[1]
Mtd	Methylenetetrahydromethanopterin dehydrogenase	Methanogenesis	K00319	EC:1.5.98.1	5,10-Methenyltetrahydromethanopterin + Reduced coenzyme F420 <=> 5,10-Methylenetetrahydromethanopterin + Coenzyme F420 + H+	This study		FeFeA1	Fermentative hydrogenases	[3]
Mer	5,10-methylenetetrahydromethanopterin reductase	Methanogenesis	K00320	EC:1.5.98.2	5,10-Methylenetetrahydromethanopterin + Reduced coenzyme F420 <=> 5-Methyl-5,6,7,8-tetrahydromethanopterin + Coenzyme F420	This study		FeFeB	Fermentative hydrogenases	[3]
McrA	Methyl-coenzyme M reductase alpha subunit	Methanogenesis	K00399	EC:2.8.4.1	Coenzyme B + 2-(Methylthio)ethanesulfonate <=> Coenzyme M 7-mercaptoheptanoylthreonine-phosphate heterodisulfide + Methane	This study		Fe	Methanogenic hydrogenases	[3]
CooS	Anaerobic carbon-monoxide dehydrogenase catalytic subunit	Reductive acetogenesis	K00198	EC:1.2.7.4	CO2 + 2 Reduced ferredoxin + 2 H+ <=> CO + H2O + 2 Oxidized ferredoxin	[1]		NiFe3a	Methanogenic hydrogenases	[3]
CODH	Anaerobic carbon-monoxide dehydrogenase	Reductive acetogenesis	K00192	EC:1.2.7.4	CO2 + 2 Reduced ferredoxin + 2 H+ <=> CO + H2O + 2 Oxidized ferredoxin	[2]		NiFe3c	Methanogenic hydrogenases	[3]
FdhA	Formate dehydrogenase (NADP+) alpha subunit	Reductive acetogenesis	K05299	EC:1.17.1.10	CO2 + NADPH + H+ <=> Formate + NADP+	[2]		NiFe4h	Methanogenic hydrogenases	[3]
AcsB	Acetyl-CoA synthase	Reductive acetogenesis	K14138	EC:2.3.1.169	CO + Methyl-Co(III) corrinoid protein + CoA <=> Acetyl-CoA + Co(I) corrinoid protein + H+	[1]		NiFe4i	Methanogenic hydrogenases	[3]
NapA	Nitrate reductase	Nitrate ammonification	K02567	EC:1.9.6.1	Nitrate + 2 Ferrocytochrome c + 2 H+ <=> 2 Ferricytochrome c + Nitrite + H2O or 2 Ferrocytochrome + Nitrate <=> 2 Ferricytochrome + Nitrite + H2O	[1]		NiFe1b	Respiratory hydrogenases	[3]
NarG	Nitrate reductase	Nitrate ammonification	K00370	EC:1.7.5.1 1.7.99.-	Nitrate + 2 Ferrocytochrome c + 2 H+ <=> 2 Ferricytochrome c + Nitrite + H2O or Nitrate + Hydroquinone <=> Nitrite + Quinone + H2O	[1]		NiFe1d	Respiratory hydrogenases	[3]
NosZ	Nitrous-oxide reductase	Nitrate ammonification	K00376	EC:1.7.2.4	Nitrous oxide + 2 Ferrocytochrome c + 2 H+ <=> Nitrogen + 2 Ferricytochrome c + H2O	[1]		FeFeC1	Sensory hydrogenases	[3]
NorB	Nitric oxide reductase subunit B	Nitrate ammonification	K04561	EC:1.7.2.5	2 Nitric oxide + 2 Ferrocytochrome c + 2 H+ <=> Nitrous oxide + 2 Ferricytochrome c + H2O	[1]		FeFeC2	Sensory hydrogenases	[3]
NirB	Nitrite reductase (NADH) large subunit	Nitrate ammonification	K00362	EC:1.7.1.15	Nitrite + 3 NADH + 3 H+ <=> Ammonia + 3 NAD+ + 2 H2O	[1]		FeFeC3	Sensory hydrogenases	[3]
NrfA	Nitrite reductase	Nitrate ammonification	K03385	EC:1.7.2.2	Nitrite + 6 Ferrocytochrome c + 6 H+ <=> Ammonia + 2 H2O + 6 Ferricytochrome c	[1]		hydB	Hydrogenase-associated diaphorases-hydB	[3]
NirK	Nitrite reductase	Nitrate ammonification	K00368	EC:1.7.2.1	Nitrite + Ferrocytochrome c + H+ <=> Nitric oxide + H2O + Ferricytochrome c	[1]
NirS	Nitrite reductase	Nitrate ammonification	K15864	EC:1.7.2.1	Nitrite + Ferrocytochrome c + H+ <=> Nitric oxide + H2O + Ferricytochrome c	[1]
AprA	Adenylylsulfate reductase	Sulfate reduction	K00394	EC:1.8.99.2	Adenylyl sulfate + FADH2 <=> AMP + Sulfite + FAD	[1]
AsrA	anaerobic sulfite reductase subunit A	Sulfate reduction	K16950	Asr	Sulfite + 3 NAD(P)H + 3 H+ <=> Hydrogen sulfide + 3 NAD(P)+ + 3 H2O	[1]
DsrA	Dissimilatory sulfite reductase alpha subunit	Sulfate reduction	K11180	EC:1.8.99.5	Sulfite + Protein dithiol + 2 Reduced acceptor + 2 H+ <=> Hydrogen sulfide + Protein disulfide + 2 Acceptor + 3 H2O	[1]
DsrB	Dissimilatory sulfite reductase beta subunit	Sulfate reduction	K11181	EC:1.8.99.5	Sulfite + Protein dithiol + 2 Reduced acceptor + 2 H+ <=> Hydrogen sulfide + Protein disulfide + 2 Acceptor + 3 H2O	[1]
DmsA	anaerobic dimethyl sulfoxide reductase subunit A	Sulfate reduction	K07306	EC:1.8.5.3	Dimethyl sulfide + Menaquinone + H2O <=> Dimethyl sulfoxide + Menaquinol	This study
						[1]		FeFeA2	Fermentative hydrogenases	[3]
[1] Greening C, Geier R, Wang C, Woods LC, Morales SE, McDonald MJ, et al. Diverse hydrogen production and consumption pathways influence methane production in ruminants. ISME J. 2019;13:2617-32.
[2] Cordero PRF, Bayly K, Man Leung P, Huang C, Islam ZF, Schittenhelm RB, et al. Atmospheric carbon monoxide oxidation is a widespread mechanism supporting microbial survival. The ISME Journal. 2019;13:2868-81
[3] Sondergaard D, Pedersen CN, Greening C. HydDB: A web tool for hydrogenase classification and analysis. Sci Rep. 2016;6:34212.

## Sheet: Community%
Genes	Average community(%)	127	134	133	143	140	122	125	117	149	132	130	142	145	152	118	147	121	151	135	136	150	146	141	137
Acetoacetyl-CoA reductase-PaaH	14.551	17.1881	15.4763	23.0988	18.0569	16.8363	19.1277	14.4013	25.1103	18.8694	22.9973	12.1529	24.2147	5.83475	6.3295	4.95233	7.66794	11.595	7.92966	20.4361	13.2928	13.818	6.88688	11.8281	11.1235
Adenylylsulfate reductase--aprA	13.7282	24.761	20.1036	27.6828	13.213	28.5025	12.5774	25.3424	24.4947	10.0813	23.3776	21.2782	4.68904	4.06457	5.3472	4.99455	3.09999	9.52287	3.64829	8.4063	22.8206	11.0192	4.78567	5.40537	10.2598
Bifurcating hydrogenases-FeFeA3	86.1349	75.8397	48.6423	97.5504	79.9889	86.8526	86.7909	76.1882	120.617	94.5068	101.441	83.5373	100.557	72.0287	78.4769	52.4945	90.2898	89.7417	83.2404	127.701	62.2004	102.581	79.4775	88.7708	87.7244
Bifurcating hydrogenases-FeFeA4	0.381158	0.0362536	0	0	0.0803521	0	0.115921	0.0418903	0.12297	0.0917183	0.126078	0.316398	0.569869	1.74847	0.747192	0.748652	0.329231	0.450148	0.374793	0.427417	0.346015	0.647559	0.578831	0.657725	0.590299
Acyl-CoA dehydrogenase-ACADS	13.4868	11.4095	12.3747	21.237	15.429	13.8417	16.9061	12.8181	19.2017	17.3732	18.2333	11.9645	21.268	7.92954	9.68964	5.26596	11.0094	14.6502	8.8556	15.6726	8.81299	16.7264	10.2887	11.7926	10.9334
Crotonoyl-CoA reductase-FabV	24.9303	62.2391	96.743	52.7599	56.9289	143.252	23.6538	39.4561	23.4752	15.671	21.1712	8.31528	3.24471	3.68592	3.09975	1.99777	0.661817	6.69335	3.30463	6.45315	5.65936	3.65456	3.05996	3.93143	9.21591
Dimethyl sulfoxide reductase-dmsA	0.0340705	0.100726	0.0406071	0	0.0446497	0	0.051936	0	0	0	0.0238508	0	0.0254881	0	0	0.0649426	0	0	0	0.0320255	0.287982	0.033213	0	0	0.11227
Energy-converting hydrogenases-NiFe4c	0.174793	0	0	0	0	0	0	0.0406257	0	0.103385	0.0333011	0.0641283	0.21068	0.225134	0.416417	0.0808827	0.20405	0.369527	0.133037	0.666621	0.458713	0.14543	0.146288	0.619835	0.276988
Energy-converting hydrogenases-NiFe4d	0.175856	0.394937	0.257565	0.987063	0.194088	0.0861571	0.280665	0.431551	0.135613	0.216722	0.331353	0.0154824	0	0	0.0640042	0.188797	0.0288664	0.147128	0	0.067711	0.167441	0.0634092	0.0287537	0.0145527	0.118686
Energy-converting hydrogenases-NiFe4e	9.48813	10.9859	12.127	13.0848	15.0059	15.4743	8.48133	8.79427	9.5482	14.9755	9.46981	8.69364	11.7064	6.87619	5.5828	5.49921	7.74861	3.1718	7.51056	12.3106	5.62173	9.51273	9.62225	8.77949	7.13221
Energy-converting hydrogenases-NiFe4f	2.01294	0.788481	1.47156	0.954272	1.46063	1.33809	2.22557	2.5855	1.63158	2.18296	1.42732	3.59388	2.39097	1.77944	1.89201	3.58355	0.869173	0.521709	2.554	2.92476	4.27461	1.99001	2.22388	1.39805	2.24848
Energy-converting hydrogenases-NiFe4g	8.25801	3.71485	2.33864	3.98904	6.30437	3.91656	7.36663	9.32603	5.09988	8.63614	6.16859	6.84591	9.89394	8.56009	12.2173	6.10506	14.9577	7.77386	12.1983	13.4986	7.0856	13.4281	6.90843	11.5546	10.3039
Fermentative hydrogenases-FeFeA1	39.8733	20.4174	13.0745	27.6047	6.30484	23.6171	9.10069	19.1181	25.6765	9.43552	21.998	28.0552	11.2549	62.6328	66.4101	99.6058	52.5373	37.1746	70.798	60.1088	52.5771	21.002	64.019	105.67	48.7676
Fermentative hydrogenases-FeFeA2	7.08593	3.93385	4.16854	6.53174	6.36543	9.36101	4.38202	5.03267	7.81751	9.01769	5.08972	4.90421	10.7232	10.0374	7.10575	4.85103	7.69146	4.47725	8.38305	12.3365	4.38869	9.06047	9.01939	8.10247	7.28112
Fermentative hydrogenases-FeFeB	24.6758	25.7443	23.933	21.8928	30.8015	31.8606	23.1922	20.1725	31.8371	29.0933	27.6731	19.8301	21.5399	29.5084	20.7719	13.6306	31.3455	13.8202	21.9421	37.3727	23.0769	28.6431	22.6835	22.7519	19.1011
Glutamate synthase-GdhA	100	353.44	353.232	369.046	239.002	468.245	226.858	257.177	235.504	191.025	222.326	179.774	160.932	108.47	98.6726	109.558	89.5014	121.481	105.219	113.878	148.916	136.373	113.477	98.17	128.937
Glutamate synthase-GltB	71.2972	182.099	209.225	167.026	117.198	315.557	63.9779	87.1647	75.6411	51.2871	60.4538	47.6992	32.9583	17.6009	22.969	20.6177	30.7881	16.9439	20.0641	25.219	39.7152	36.6234	24.0813	20.7763	25.4458
Glutamate synthase-GltD	100	336.474	297.784	307.648	222.146	403.919	192.901	224.231	185.619	141.93	180.949	153.921	129.221	72.4538	70.0645	63.0248	76.6397	87.3698	69.9363	77.538	130.106	103.673	79.1758	56.4863	88.0091
Hydrogenase-associated diaphorases-hydB	100	105.389	83.1075	137.855	134.8	124.352	148.4	125.578	188.147	176.779	169.988	128.373	172.172	143.28	151.697	101.204	184.233	214.094	153.535	233.888	114.061	180.519	140.39	159.153	168.691
Lactate dehydrogenase-LDH	12.9781	24.8267	24.7721	20.0644	18.0597	21.5395	19.7672	11.3734	18.2798	13.0429	30.0981	11.0023	8.02701	6.03028	5.73494	6.95533	3.6855	5.28433	3.12238	13.6457	19.8117	9.17372	4.85377	5.49563	6.82814
Malate dehydrogenase-Mdh	10.3088	2.77036	3.85776	2.42578	2.01783	1.82298	2.57229	3.04183	2.56906	4.03352	5.37583	6.08629	5.95378	16.1032	15.1853	30.5576	16.0405	20.0323	19.9399	16.1962	13.8866	4.98164	15.8736	22.2343	13.8534
Methanogenesis-McrA	1.46796	0.152602	1.40576	0.481861	0.86197	0.324975	0.372236	0.286752	0.894553	0.625121	0.734861	0.564981	1.37607	1.19157	5.33476	1.33801	7.45746	1.9296	2.8592	1.34462	0.535282	1.56125	0.949012	1.32324	1.32521
Methanogenesis-Mer	0.0786086	0	0.053437	0	0	0	0	0	0	0	0.034873	0.0534314	0.157007	0.116593	0.236463	0.0569346	0.45183	0.109124	0.149707	0.278515	0.033035	0.0649581	0.0344129	0.0562845	0
Methanogenesis-Mtd	0.167678	0.0528505	0.100619	0.078305	0.298056	0	0.215721	0	0.23822	0.16978	0.0479608	0.039267	0.0364094	0.144815	0.695472	0.271775	0.531349	0.0214568	0.209425	0.271013	0.0604409	0.155836	0.184706	0.0265284	0.174256
Methanogenic hydrogenases-Fe	0.316383	0.0277297	0.0369155	0.0354008	0.303126	0.0264047	0.0118036	0.0189539	0.0802163	0.0643296	0.0589016	0	0.305992	0.145746	2.04773	0.272557	2.56336	0.216847	0.479379	0.149927	0.0392702	0.420691	0.0939633	0.130435	0.0635169
Methanogenic hydrogenases-NiFe3a	0.840024	0.0923116	0.139733	0.181701	0.763192	0.104094	0.349435	0.200185	0.485528	0.410634	0.267986	0.355768	0.993881	0.66704	3.85264	0.410692	4.82955	0.460632	1.31801	0.978461	0.403532	0.875242	0.544377	1.28159	0.194359
Methanogenic hydrogenases-NiFe3c	1.25396	0.190763	1.25569	0.348972	0.652076	0.617535	0.691529	0.0763928	0.639444	0.466701	0.440222	0.349681	0.630908	0.853517	5.45882	0.953422	5.79612	0.720985	2.50122	1.11093	0.997532	1.76473	0.841839	1.98524	0.750831
Methanogenic hydrogenases-NiFe4h	0.590042	0.104678	0.115425	0.0970243	0.422331	0.0623957	0.205983	0.0362486	0.259027	0.317161	0.333582	0	0.670172	0.460923	2.83949	0.253148	3.60872	0.260929	1.32084	0.669313	0.182757	0.820417	0.392485	0.540682	0.18728
Methanogenic hydrogenases-NiFe4i	0.674981	0.0237078	0.0968728	0.188224	0.546632	0.0136727	0.0627787	0.0547879	0.229826	0.462661	0.237224	0.0489757	0.569713	0.341361	3.40334	0.340346	4.64528	0.259458	1.32409	0.805691	0.354562	0.679602	0.288633	0.940644	0.281466
Nitrate reduction-NapA, NarG	19.5651	90.7315	52.9249	88.8923	8.19525	101.676	12.4423	21.9959	25.0055	2.80863	31.0632	13.992	0.998289	1.01264	0.571435	2.45432	0.569685	0.302568	1.15493	1.26754	4.43779	1.94563	1.54286	1.75209	1.82523
Nitrate reduction-NapA, NarG	0.887944	0.151651	0.388324	0.21822	0.653472	0.448336	1.5105	1.233	0.946167	2.11576	1.05424	1.53426	0.717667	0.816373	0.445325	1.9844	0.313709	0.606087	0.992217	0.558718	1.55315	0.573652	0.994905	0.438613	1.06192
Nitric oxide reduction-NorB	0	0	0	0	0	0	0	0	0	0	0	0	0	0	0	0	0	0	0	0	0	0	0	0	0
Nitrite reduction to ammonium-NirB	0	0	0	0	0	0	0	0	0	0	0	0	0	0	0	0	0	0	0	0	0	0	0	0	0
Nitrite reduction to ammonium-NrfA	100	126.667	108.253	123.604	101.524	116.727	141.011	151.73	117.71	126.017	133.629	180.111	155.005	108.11	90.6149	90.5455	94.5389	100.629	107.255	69.1653	151.066	125.626	107.553	78.3178	118.343
Nitrite reduction to nitric oxide-NirK	0	0	0	0	0	0	0	0	0	0	0	0	0	0	0	0	0	0	0	0	0	0	0	0	0
Nitrite reduction to nitric oxide-NirS	0	0	0	0	0	0	0	0	0	0	0	0	0	0	0	0	0	0	0	0	0	0	0	0	0
Nitrous oxide reduction-NosZ	0.258356	0.0502515	0.280526	0	0	0.31073	0.293887	0.0907378	0.27525	0.403221	1.35461	0.304244	0.0913817	0.450785	0.206726	0.0597461	0.65722	0.143864	0.144879	0.0899046	0.26309	0.391493	0.0695495	0.0154581	0.252995
Respiratory hydrogenases-NiFe1b	0.173118	0	0.0137588	0	0	0	0	0.0788705	0.0322943	0.0659374	0	0.0391252	0.189245	0.0604793	0.223879	0.305519	0.403884	0.323248	0.180182	0.45324	0.0975762	0.179081	0.109526	1.01996	0.37903
Respiratory hydrogenases-NiFe1d	11.8715	26.7462	14.5543	35.2583	10.5957	28.1356	11.3511	24.3871	32.0787	5.45335	24.8576	20.8261	4.97179	3.14648	3.08795	3.81733	3.07461	0.903159	3.22043	5.27558	6.87187	5.78122	4.52231	2.97971	3.02035
Sensory hydrogenases-FeFeC1	1.81105	0.834591	1.98727	1.01098	2.37067	3.62996	0.897453	0.804129	1.14636	1.90549	1.50111	2.46331	3.22022	3.84249	2.74038	1.12081	3.26873	0.345562	1.97824	1.00306	1.08209	2.06982	2.22911	1.26928	0.743988
Sensory hydrogenases-FeFeC2	4.41473	8.39876	5.15623	6.36883	7.67651	5.47468	8.20161	4.48962	13.3361	7.33797	6.81953	4.69155	2.61978	1.86723	1.13663	1.24471	0.786608	1.12282	1.02862	5.88927	1.7339	4.20647	1.94027	2.20077	2.22504
Sensory hydrogenases-FeFeC3	3.28285	2.11344	1.91037	2.7935	5.18465	1.79116	4.78208	2.54076	5.31431	4.74649	2.89266	2.29945	2.73398	3.03754	3.49847	2.30981	4.83176	3.5846	2.48381	5.59185	2.57105	2.65412	2.16357	3.93975	3.01921
Succinate dehydrogenase-SdhA, FrdA	51.1635	83.8951	116.412	69.2999	86.6684	191.664	43.4896	73.1292	55.1453	40.3324	24.3108	33.404	34.9729	18.511	31.5403	25.1202	35.0628	53.5311	24.342	32.2899	31.8314	34.5	22.936	27.1862	38.3503
Sulfite reductase-AsrA	0.299613	0	0.026359	0	0.0289831	0	0.144196	0.0800568	0.117788	0.0952037	0.111445	0.0498023	0.141649	0.195329	0.515519	0.229788	0.607413	0.692063	0.468237	0.985032	0.394731	0.252982	0.0939395	1.19049	0.769716
Sulfite reductase-DsrA	3.51209	4.18583	2.73875	4.24468	2.9139	3.08191	4.62903	2.17261	2.43893	3.81707	2.25519	2.39075	3.70182	2.74804	3.85006	2.0938	4.49304	2.24708	2.93374	3.67612	10.997	4.88925	3.07151	2.47767	2.24232
Wood-Ljungdahl-AcsB	8.13617	2.53142	2.36088	5.8073	7.06403	5.1654	9.04302	5.95447	16.0173	8.52416	10.2167	3.58332	8.89428	8.41898	8.10516	7.93214	9.58515	10.408	10.4591	11.5507	6.63208	10.1152	7.47566	10.2187	9.20493
Wood-Ljungdahl-CODH	36.4393	84.9289	100.945	87.3796	61.504	180.507	29.8071	67.236	56.6028	17.2297	25.1193	30.3404	7.97897	7.35459	10.6086	7.94706	15.6836	9.9239	9.20455	6.4284	15.2616	11.3456	11.3906	8.47751	11.3387
Wood-Ljungdahl-CooS	41.0574	86.9495	102.674	90.2351	67.3201	182.55	34.804	71.6798	62.5078	21.0389	32.2753	34.6407	12.2787	11.7414	15.5146	14.2156	20.1033	13.619	14.3353	13.432	21.8511	16.1184	15.0732	14.4639	15.9564
Wood-Ljungdahl-fdhA	1.86261	0.360864	0.521649	0.722264	0.557272	1.1893	0.452958	0.897644	2.29994	1.11627	2.43781	4.44815	2.32438	1.35622	4.27638	0.948512	4.78222	1.72179	1.58921	1.59335	2.87082	2.59532	0.781287	1.19399	3.66509
