# Supplementary material for: Distinct microbial hydrogen and reductant disposal pathways explain interbreed variations in ruminant methane yield
Source: Research Square preprint supplement (doi:10.21203/rs.3.rs-2831003/v1), 2024-04-11
Supplement: Supplementary file 9 [file 7986c0f59db731b4f3500b79.xlsx]

## Sheet: Sample information
Sample name	Cow number	Breed	Sequences	Bases(bp)	AverageLength(bp)
145	45421	Jersey	49961	20957607	419.47
146	49285	Jersey	36453	15276158	419.06
147	47351	Jersey	36266	15231491	419.99
150	48839	Jersey	48250	20219564	419.05
151	48166	Jersey	32418	13583354	419
152	45434	Jersey	49269	20651335	419.15
135	48334	Jersey	44983	18846526	418.96
136	48655	Jersey	43713	18350540	419.79
137	49670	Jersey	43399	18155316	418.33
141	49652	Jersey	28041	11626551	414.62
118	45472	Jersey	49931	20982226	420.22
121	47770	Jersey	37848	15832928	418.32
133	31447	Holstein	44665	18860150	422.25
143	30889	Holstein	52659	22289615	423.28
149	19707	Holstein	55934	23421387	418.73
130	18227	Holstein	32869	13859544	421.66
132	19627	Holstein	50797	21288159	419.08
134	17270	Holstein	40913	17345174	423.95
140	19334	Holstein	43379	18366164	423.38
142	31408	Holstein	43054	18080789	419.95
117	31260	Holstein	44853	18779475	418.68
122	30662	Holstein	53908	22700509	421.09
125	29292	Holstein	58498	24613723	420.76
127	17365	Holstein	44608	18836033	422.25

## Sheet: ASV taxonomy
OTU ID	taxonomy	117	118	121	122	125	127	130	132	133	134	135	136	137	140	141	142	143	145	146	147	149	150	151	152
ASV1	d__Bacteria; p__Proteobacteria; c__Gammaproteobacteria; o__Enterobacterales; f__Succinivibrionaceae; g__Succinivibrionaceae UCG-001; s__uncultured rumen bacterium	667	0	0	916	1109	2308	0	0	2348	4071	0	0	0	3132	0	0	3146	0	0	0	425	0	0	0
ASV2	d__Bacteria; p__Proteobacteria; c__Gammaproteobacteria; o__Enterobacterales; f__Succinivibrionaceae; g__Succinivibrionaceae UCG-001; s__uncultured rumen bacterium	590	0	0	885	1092	2180	0	12	2178	3749	0	0	0	3091	0	0	3104	0	0	0	435	0	0	0
ASV3	d__Bacteria; p__Bacteroidota; c__Bacteroidia; o__Bacteroidales; f__Prevotellaceae; g__Prevotella_7; s__uncultured bacterium	193	0	0	240	193	2128	12	600	2102	714	0	0	0	1053	4	0	1032	0	0	0	0	0	0	0
ASV4	d__Bacteria; p__Bacteroidota; c__Bacteroidia; o__Bacteroidales; f__Prevotellaceae; g__Prevotella; s__uncultured bacterium	268	93	134	1182	633	267	902	717	325	186	168	134	90	140	0	523	156	504	278	174	296	217	145	85
ASV5	d__Bacteria; p__Bacteroidota; c__Bacteroidia; o__Bacteroidales; f__Prevotellaceae; g__Prevotella; s__uncultured rumen bacterium	255	0	0	33	0	371	39	555	418	1371	0	0	0	1767	0	0	1715	0	0	0	0	0	0	0
ASV6	d__Bacteria; p__Proteobacteria; c__Gammaproteobacteria; o__Enterobacterales; f__Succinivibrionaceae; g__Succinivibrionaceae UCG-001; s__uncultured rumen bacterium	225	0	0	305	389	770	0	0	760	1345	0	0	0	1017	0	0	1043	0	0	0	152	0	3	0
ASV7	d__Bacteria; p__Bacteroidota; c__Bacteroidia; o__Bacteroidales; f__Prevotellaceae; g__Prevotella; s__uncultured rumen bacterium	98	745	171	43	52	33	275	70	29	49	348	398	293	0	134	345	28	320	390	684	81	558	502	634
ASV8	d__Bacteria; p__Bacteroidota; c__Bacteroidia; o__Bacteroidales; f__Prevotellaceae; g__Prevotella; s__uncultured bacterium	211	136	0	301	73	226	1515	392	226	309	15	20	5	196	0	26	221	204	340	126	108	360	0	321
ASV9	d__Bacteria; p__Bacteroidota; c__Bacteroidia; o__Bacteroidales; f__Prevotellaceae; g__Prevotella; s__Prevotella bryantii B14	147	51	38	310	456	366	587	216	441	378	153	188	149	349	0	37	349	24	40	50	132	82	11	106
ASV10	d__Bacteria; p__Bacteroidota; c__Bacteroidia; o__Bacteroidales; f__Prevotellaceae; g__Prevotella; s__uncultured rumen bacterium	76	360	139	121	94	53	311	127	62	76	628	497	230	37	174	200	0	242	352	653	154	206	0	148
ASV11	d__Bacteria; p__Bacteroidota; c__Bacteroidia; o__Bacteroidales; f__Prevotellaceae; g__Prevotella; s__uncultured rumen bacterium	36	558	197	42	95	0	244	78	49	30	142	356	97	0	0	389	0	382	263	680	64	177	366	293
ASV12	d__Bacteria; p__Bacteroidota; c__Bacteroidia; o__Bacteroidales; f__Prevotellaceae; g__Prevotella; s__uncultured rumen bacterium	0	164	213	138	117	0	336	0	0	9	399	473	392	0	0	276	0	274	203	350	95	167	353	341
ASV13	d__Bacteria; p__Bacteroidota; c__Bacteroidia; o__Bacteroidales; f__Prevotellaceae; g__Prevotella; s__uncultured bacterium	71	235	314	93	167	0	127	32	0	0	187	265	204	0	66	248	0	454	265	185	212	323	335	125
ASV14	d__Bacteria; p__Bacteroidota; c__Bacteroidia; o__Bacteroidales; f__Prevotellaceae; g__Prevotella; s__uncultured rumen bacterium	184	75	34	289	123	95	267	195	104	107	39	131	33	98	59	461	142	193	186	217	174	251	359	63
ASV15	d__Bacteria; p__Bacteroidota; c__Bacteroidia; o__Bacteroidales; f__Prevotellaceae; g__Prevotella; s__uncultured rumen bacterium	0	248	284	123	136	83	275	179	78	72	331	395	229	11	0	307	0	160	95	268	109	144	77	238
ASV16	d__Bacteria; p__Bacteroidota; c__Bacteroidia; o__Bacteroidales; f__Prevotellaceae; g__Prevotellaceae UCG-001; s__uncultured rumen bacterium	89	75	37	86	576	416	37	113	579	275	65	81	44	274	259	50	263	29	61	83	44	86	41	67
ASV17	d__Bacteria; p__Firmicutes; c__Negativicutes; o__Acidaminococcales; f__Acidaminococcaceae; g__Succiniclasticum; s__uncultured rumen bacterium	0	207	147	85	148	0	98	101	0	49	0	182	124	133	136	201	0	242	454	427	523	90	285	136
ASV18	d__Bacteria; p__Bacteroidota; c__Bacteroidia; o__Bacteroidales; f__Prevotellaceae; g__Prevotella; s__uncultured rumen bacterium	0	451	98	57	55	0	291	0	0	0	170	194	143	33	106	235	0	190	233	402	57	325	339	393
ASV19	d__Bacteria; p__Firmicutes; c__Negativicutes; o__Veillonellales-Selenomonadales; f__Selenomonadaceae; g__uncultured; s__uncultured rumen bacterium	368	0	0	236	542	323	371	433	471	224	0	0	0	236	0	0	240	0	0	0	0	0	0	0
ASV20	d__Bacteria; p__Firmicutes; c__Clostridia; o__Lachnospirales; f__Lachnospiraceae	124	16	0	81	192	216	23	91	236	468	15	8	20	276	88	159	301	96	79	19	555	182	43	35
ASV21	d__Bacteria; p__Bacteroidota; c__Bacteroidia; o__Bacteroidales; f__Prevotellaceae; g__Prevotella; s__uncultured rumen bacterium	297	24	0	82	114	629	281	141	630	170	44	94	0	196	13	85	234	82	74	25	129	100	0	27
ASV22	d__Bacteria; p__Firmicutes; c__Negativicutes; o__Acidaminococcales; f__Acidaminococcaceae; g__Succiniclasticum; s__uncultured rumen bacterium	120	203	104	65	128	63	156	113	73	0	338	143	113	0	207	220	170	205	304	0	306	126	186	142
ASV23	d__Bacteria; p__Bacteroidota; c__Bacteroidia; o__Bacteroidales; f__Prevotellaceae; g__Prevotella; s__Prevotella ruminicola 23	100	33	59	331	184	124	312	302	151	170	101	104	0	105	0	315	69	126	82	0	141	116	100	78
ASV24	d__Bacteria; p__Firmicutes; c__Clostridia; o__Lachnospirales; f__Lachnospiraceae; g__uncultured	0	87	0	6	77	0	396	180	0	0	173	39	338	0	590	23	0	637	260	119	0	350	45	69
ASV25	d__Bacteria; p__Firmicutes; c__Clostridia; o__Oscillospirales; f__Oscillospiraceae; g__NK4A214 group; s__uncultured bacterium	196	218	285	0	47	0	0	0	0	30	367	0	131	34	422	220	0	86	0	314	192	188	90	273
ASV26	d__Bacteria; p__Bacteroidota; c__Bacteroidia; o__Bacteroidales; f__Prevotellaceae; g__Prevotella; s__uncultured bacterium	0	251	54	0	99	0	151	0	0	0	231	228	124	56	163	125	0	134	209	453	99	133	470	100
ASV27	d__Bacteria; p__Bacteroidota; c__Bacteroidia; o__Bacteroidales; f__Prevotellaceae; g__Prevotella_7; s__uncultured bacterium	0	0	0	0	0	476	0	0	444	674	0	0	0	571	0	0	599	0	0	0	0	0	0	0
ASV28	d__Bacteria; p__Firmicutes; c__Negativicutes; o__Veillonellales-Selenomonadales; f__Selenomonadaceae; g__Selenomonas	265	0	0	195	423	307	278	326	281	155	0	0	0	106	0	0	118	0	34	0	34	52	0	0
ASV29	d__Bacteria; p__Bacteroidota; c__Bacteroidia; o__Bacteroidales; f__Prevotellaceae; g__Prevotella	87	0	0	426	238	59	390	285	0	81	0	83	55	0	0	208	0	234	110	0	111	122	0	0
ASV30	d__Bacteria; p__Bacteroidota; c__Bacteroidia; o__Bacteroidales; f__Prevotellaceae; g__Prevotellaceae UCG-004; s__uncultured bacterium	64	210	16	107	157	109	131	81	125	93	93	62	121	56	51	31	53	117	77	309	33	205	145	262
ASV31	d__Bacteria; p__Bacteroidota; c__Bacteroidia; o__Bacteroidales; f__Prevotellaceae; g__Prevotella; s__uncultured rumen bacterium	75	284	0	78	0	41	102	0	0	0	364	164	182	26	175	174	0	220	158	187	51	118	214	187
ASV32	d__Bacteria; p__Bacteroidota; c__Bacteroidia; o__Bacteroidales; f__Rikenellaceae; g__Rikenellaceae RC9 gut group; s__uncultured bacterium	95	139	210	57	47	0	50	46	0	0	188	99	234	16	384	92	14	134	185	189	72	143	244	129
ASV33	d__Bacteria; p__Firmicutes; c__Clostridia; o__Oscillospirales; f__Oscillospiraceae; g__UCG-005; s__uncultured rumen bacterium	151	126	295	78	91	32	0	100	34	40	189	99	167	60	193	64	71	63	143	143	113	109	139	144
ASV34	d__Bacteria; p__Bacteroidota; c__Bacteroidia; o__Bacteroidales; f__Prevotellaceae; g__Prevotella; s__uncultured bacterium	97	0	0	74	0	186	401	596	212	0	0	0	0	388	0	0	326	0	0	0	38	0	0	0
ASV35	d__Bacteria; p__Bacteroidota; c__Bacteroidia; o__Bacteroidales; f__Prevotellaceae; g__Prevotella; s__uncultured rumen bacterium	56	194	140	67	53	21	300	61	0	32	173	168	227	23	64	117	22	104	71	69	53	117	159	191
ASV36	d__Bacteria; p__Bacteroidota; c__Bacteroidia; o__Bacteroidales; f__Prevotellaceae; g__Prevotella; s__uncultured rumen bacterium	52	193	91	123	87	0	107	0	0	0	183	147	91	0	50	244	0	117	101	203	108	159	150	77
ASV37	d__Bacteria; p__Firmicutes; c__Clostridia; o__Oscillospirales; f__Oscillospiraceae; g__UCG-005; s__uncultured bacterium	147	126	118	79	41	65	63	68	79	36	154	163	141	56	119	66	57	77	193	129	46	116	132	86
ASV38	d__Bacteria; p__Bacteroidota; c__Bacteroidia; o__Bacteroidales; f__Prevotellaceae; g__Prevotella_7; s__Prevotella albensis	126	0	0	66	40	414	82	75	559	220	0	0	0	124	0	0	139	0	16	0	52	18	0	0
ASV39	d__Bacteria; p__Bacteroidota; c__Bacteroidia; o__Bacteroidales; f__Muribaculaceae; g__norank; s__uncultured rumen bacterium	110	66	46	58	78	70	95	85	60	30	85	49	88	38	187	66	44	43	234	82	104	108	71	63
ASV40	d__Bacteria; p__Bacteroidota; c__Bacteroidia; o__Bacteroidales; f__Prevotellaceae; g__Prevotella_7; s__uncultured bacterium	53	0	0	42	0	515	0	128	437	183	0	0	0	261	0	0	242	0	0	0	0	0	0	0
ASV41	d__Bacteria; p__Bacteroidota; c__Bacteroidia; o__Bacteroidales; f__Prevotellaceae; g__Prevotella; s__uncultured rumen bacterium	23	192	64	34	31	0	126	0	0	0	210	159	135	0	0	86	0	98	99	246	25	89	80	210
ASV42	d__Bacteria; p__Firmicutes; c__Clostridia; o__Lachnospirales; f__Lachnospiraceae; g__Shuttleworthia; s__uncultured bacterium	16	4	0	228	109	259	95	91	319	51	14	0	38	45	0	194	47	5	28	0	147	33	0	11
ASV43	d__Bacteria; p__Bacteroidota; c__Bacteroidia; o__Bacteroidales; f__Prevotellaceae; g__Prevotella; s__uncultured rumen bacterium	31	123	79	38	48	0	201	69	0	8	131	158	130	0	0	104	0	86	101	126	39	70	78	220
ASV44	d__Bacteria; p__Bacteroidota; c__Bacteroidia; o__Bacteroidales; f__Prevotellaceae; g__Prevotella_7; s__uncultured bacterium	120	0	0	268	66	324	60	53	354	103	0	0	0	124	0	8	177	0	0	0	36	0	0	0
ASV45	d__Bacteria; p__Bacteroidota; c__Bacteroidia; o__Bacteroidales; f__Prevotellaceae; g__Prevotella; s__uncultured bacterium	137	80	0	234	102	16	129	39	13	27	73	90	52	15	0	146	22	101	56	84	116	60	63	26
ASV46	d__Bacteria; p__Firmicutes; c__Clostridia; o__Oscillospirales; f__Ruminococcaceae; g__Ruminococcus; s__uncultured bacterium	308	29	67	55	81	232	58	43	230	86	38	24	37	66	58	41	71	0	0	0	80	42	25	24
ASV47	d__Bacteria; p__Bacteroidota; c__Bacteroidia; o__Bacteroidales; f__Prevotellaceae; g__Prevotella	64	66	36	16	63	91	49	69	130	0	56	20	68	50	46	149	44	256	113	58	75	48	60	27
ASV48	d__Bacteria; p__Bacteroidota; c__Bacteroidia; o__Bacteroidales; f__Prevotellaceae; g__Prevotella_7; s__Prevotella albensis	60	0	0	175	86	153	46	0	171	98	0	0	0	208	0	33	344	0	0	0	121	0	0	12
ASV49	d__Bacteria; p__Patescibacteria; c__Gracilibacteria; o__Absconditabacteriales (SR1); f__norank; g__norank	98	77	81	109	66	33	88	226	35	35	38	0	76	27	0	33	43	0	26	100	92	277	17	0
ASV50	d__Bacteria; p__Bacteroidota; c__Bacteroidia; o__Bacteroidales; f__Prevotellaceae; g__Prevotella; s__uncultured bacterium	102	0	0	283	101	97	65	63	127	105	77	0	85	37	0	35	33	49	87	0	71	0	0	65
ASV51	d__Bacteria; p__Firmicutes; c__Negativicutes; o__Acidaminococcales; f__Acidaminococcaceae; g__Succiniclasticum; s__uncultured rumen bacterium	34	69	105	28	54	0	48	13	7	0	64	61	75	30	92	108	24	101	172	78	132	65	183	89
ASV52	d__Bacteria; p__Firmicutes; c__Clostridia; o__Clostridia UCG-014; f__norank; g__norank; s__uncultured rumen bacterium	67	59	64	42	38	34	28	82	0	23	91	56	102	61	80	47	80	54	168	110	55	128	77	66
ASV53	d__Bacteria; p__Bacteroidota; c__Bacteroidia; o__Bacteroidales; f__Prevotellaceae; g__Prevotella; s__uncultured rumen bacterium	29	24	0	76	83	26	224	42	24	40	175	213	60	11	6	69	0	87	70	37	92	48	0	70
ASV54	d__Bacteria; p__Bacteroidota; c__Bacteroidia; o__Bacteroidales; f__Prevotellaceae; g__Prevotellaceae UCG-003; s__uncultured rumen bacterium	2	314	150	29	20	0	54	28	0	0	79	103	94	7	43	92	22	71	65	0	20	60	72	162
ASV55	d__Bacteria; p__Bacteroidota; c__Bacteroidia; o__Bacteroidales; f__Prevotellaceae; g__Prevotella; s__uncultured rumen bacterium	0	94	98	53	101	0	68	0	0	0	174	115	84	6	0	85	0	141	143	0	83	72	156	57
ASV56	d__Bacteria; p__Firmicutes; c__Clostridia; o__Oscillospirales; f__Ruminococcaceae; g__Ruminococcus; s__uncultured bacterium	0	55	0	29	56	0	119	0	0	0	125	126	56	0	181	107	0	133	144	160	61	81	138	76
ASV57	d__Bacteria; p__Bacteroidota; c__Bacteroidia; o__Bacteroidales; f__Muribaculaceae; g__norank; s__uncultured rumen bacterium	103	60	67	64	0	55	87	61	56	0	72	38	98	23	188	61	0	48	101	0	96	105	79	72
ASV58	d__Bacteria; p__Bacteroidota; c__Bacteroidia; o__Bacteroidales; f__Prevotellaceae; g__Prevotella; s__uncultured bacterium	87	97	0	58	109	0	42	25	70	0	104	63	104	19	0	0	0	32	213	124	79	129	0	96
ASV59	d__Bacteria; p__Bacteroidota; c__Bacteroidia; o__Bacteroidales; f__Prevotellaceae; g__Prevotella; s__uncultured rumen bacterium	39	105	49	56	75	0	98	28	0	33	102	112	60	0	30	59	24	53	69	142	96	136	89	69
ASV60	d__Bacteria; p__Firmicutes; c__Clostridia; o__Oscillospirales; f__Hungateiclostridiaceae; g__Saccharofermentans; s__uncultured rumen bacterium	87	64	100	34	52	21	50	79	0	0	83	55	117	28	228	57	0	41	59	93	103	72	52	44
ASV61	d__Bacteria; p__Bacteroidota; c__Bacteroidia; o__Bacteroidales; f__Prevotellaceae; g__Prevotella; s__uncultured rumen bacterium	0	72	137	25	16	0	24	0	0	0	173	177	112	0	68	109	0	61	185	0	17	10	119	189
ASV62	d__Bacteria; p__Bacteroidota; c__Bacteroidia; o__Bacteroidales; f__Muribaculaceae; g__norank; s__uncultured rumen bacterium	32	0	0	22	40	25	115	165	0	27	0	95	44	47	0	75	158	0	92	47	215	19	93	52
ASV63	d__Bacteria; p__Bacteroidota; c__Bacteroidia; o__Bacteroidales; f__Prevotellaceae; g__Prevotella; s__uncultured rumen bacterium	28	167	0	0	0	0	86	87	0	19	132	0	127	0	126	90	108	0	90	212	83	0	0	113
ASV64	d__Bacteria; p__Bacteroidota; c__Bacteroidia; o__Bacteroidales; f__Prevotellaceae; g__Prevotella; s__uncultured bacterium	110	43	43	169	88	18	52	65	24	25	0	10	0	10	0	178	0	117	67	55	69	101	88	8
ASV65	d__Bacteria; p__Bacteroidota; c__Bacteroidia; o__Bacteroidales; f__Prevotellaceae; g__Prevotella; s__uncultured rumen bacterium	0	101	0	0	0	0	0	0	0	0	202	311	0	0	37	173	0	126	103	0	0	79	0	228
ASV66	d__Bacteria; p__Bacteroidota; c__Bacteroidia; o__Bacteroidales; f__Prevotellaceae; g__Prevotella_7	75	0	0	102	127	169	24	52	292	129	0	0	0	104	0	0	174	0	0	0	21	0	0	0
ASV67	d__Bacteria; p__Firmicutes; c__Negativicutes; o__Veillonellales-Selenomonadales; f__Selenomonadaceae; g__Selenomonas; s__Selenomonas ruminantium subsp. lactilytica TAM6421	40	126	0	33	62	0	56	23	0	0	166	259	80	0	0	37	0	37	68	123	55	71	40	65
ASV68	d__Bacteria; p__Bacteroidota; c__Bacteroidia; o__Bacteroidales; f__Prevotellaceae; g__Prevotella; s__uncultured rumen bacterium	46	0	0	137	185	20	0	56	0	42	100	0	83	19	0	162	0	44	61	0	119	0	50	75
ASV69	d__Bacteria; p__Bacteroidota; c__Bacteroidia; o__Bacteroidales; f__Prevotellaceae; g__Prevotella; s__uncultured rumen bacterium	0	0	115	0	76	0	124	0	0	0	164	174	88	0	0	89	0	79	79	101	67	70	41	108
ASV70	d__Bacteria; p__Firmicutes; c__Clostridia; o__Oscillospirales; f__Oscillospiraceae; g__NK4A214 group; s__uncultured rumen bacterium	0	0	0	183	376	0	162	18	0	0	26	0	43	0	0	40	0	0	63	0	24	0	311	42
ASV71	d__Bacteria; p__Patescibacteria; c__Gracilibacteria; o__Absconditabacteriales (SR1); f__norank; g__norank; s__uncultured rumen bacterium	57	74	147	27	13	11	11	36	0	0	99	41	127	11	51	75	17	61	114	86	90	91	59	70
ASV72	d__Bacteria; p__Bacteroidota; c__Bacteroidia; o__Bacteroidales; f__Prevotellaceae; g__Prevotella; s__uncultured rumen bacterium	0	143	117	33	0	0	0	0	0	0	135	131	67	0	0	137	0	107	70	150	57	91	105	0
ASV73	d__Bacteria; p__Bacteroidota; c__Bacteroidia; o__Bacteroidales; f__Prevotellaceae; g__Prevotella; s__uncultured bacterium	0	92	55	46	59	0	104	0	0	26	60	115	58	0	0	128	0	119	97	134	58	78	124	45
ASV74	d__Bacteria; p__Proteobacteria; c__Gammaproteobacteria; o__Enterobacterales; f__Succinivibrionaceae; g__Succinivibrionaceae UCG-002; s__uncultured rumen bacterium	87	28	88	0	29	0	147	0	0	0	185	113	232	0	0	30	0	87	20	21	0	94	0	138
ASV75	d__Bacteria; p__Bacteroidota; c__Bacteroidia; o__Bacteroidales; f__Prevotellaceae; g__Prevotella; s__uncultured rumen bacterium	51	84	58	54	44	43	107	0	0	0	72	106	50	0	0	108	0	77	55	155	40	0	101	64
ASV76	d__Bacteria; p__Bacteroidota; c__Bacteroidia; o__Bacteroidales; f__Prevotellaceae; g__Prevotella; s__uncultured rumen bacterium	31	125	0	19	41	26	84	0	0	37	46	0	38	0	0	283	48	124	83	119	24	60	52	49
ASV77	d__Bacteria; p__Firmicutes; c__Clostridia; o__Christensenellales; f__Christensenellaceae; g__Christensenellaceae R-7 group; s__uncultured rumen bacterium	97	0	121	35	41	0	0	75	0	12	187	110	0	0	252	90	0	0	0	0	0	0	214	159
ASV78	d__Bacteria; p__Bacteroidota; c__Bacteroidia; o__Bacteroidales; f__Prevotellaceae; g__uncultured; s__uncultured bacterium	21	15	31	86	65	21	103	128	28	28	32	22	29	6	0	130	0	0	0	0	120	166	90	38
ASV79	d__Bacteria; p__Bacteroidota; c__Bacteroidia; o__Bacteroidales; f__Prevotellaceae; g__Prevotella; s__uncultured rumen bacterium	0	96	66	0	0	0	154	0	0	0	128	124	96	0	0	106	0	78	89	110	0	63	0	182
ASV80	d__Bacteria; p__Bacteroidota; c__Bacteroidia; o__Bacteroidales; f__Prevotellaceae; g__Prevotella; s__uncultured rumen bacterium	30	76	44	72	38	10	61	54	11	0	46	0	93	10	0	91	0	102	109	99	53	55	71	99
ASV81	d__Bacteria; p__Bacteroidota; c__Bacteroidia; o__Bacteroidales; f__p-251-o5; g__norank; s__uncultured bacterium	0	93	63	31	0	0	0	73	0	0	69	51	71	0	43	60	0	46	59	151	51	138	94	103
ASV82	d__Bacteria; p__Bacteroidota; c__Bacteroidia; o__Bacteroidales; f__Prevotellaceae; g__Prevotella	38	68	0	113	0	0	129	62	0	48	49	60	50	0	53	100	0	102	78	0	89	0	75	38
ASV83	d__Bacteria; p__Bacteroidota; c__Bacteroidia; o__Bacteroidales; f__Prevotellaceae; g__Prevotella; s__uncultured bacterium	98	0	0	105	149	0	156	0	0	0	0	0	0	0	0	217	0	0	0	0	108	84	0	155
ASV84	d__Bacteria; p__Bacteroidota; c__Bacteroidia; o__Bacteroidales; f__Prevotellaceae; g__Prevotella; s__uncultured bacterium	0	124	33	67	50	25	0	58	0	16	73	57	0	0	46	101	0	91	85	189	0	0	72	109
ASV85	d__Bacteria; p__Bacteroidota; c__Bacteroidia; o__Bacteroidales; f__F082; g__norank; s__uncultured rumen bacterium	36	19	49	88	55	8	46	0	0	0	90	64	125	4	62	14	0	65	99	29	51	83	29	86
ASV86	d__Bacteria; p__Firmicutes; c__Clostridia; o__Oscillospirales; f__Oscillospiraceae; g__Colidextribacter	0	35	25	0	0	0	6	0	0	0	147	105	146	0	207	0	0	66	70	47	0	180	41	133
ASV87	d__Bacteria; p__Bacteroidota; c__Bacteroidia; o__Bacteroidales; f__Prevotellaceae; g__Prevotella; s__uncultured rumen bacterium	83	37	4	70	83	40	0	73	0	53	0	0	24	124	0	57	184	87	71	0	0	0	0	0
ASV88	d__Bacteria; p__Bacteroidota; c__Bacteroidia; o__Bacteroidales; f__Prevotellaceae; g__Prevotella; s__uncultured rumen bacterium	39	160	0	20	40	0	0	0	0	12	48	92	0	0	0	0	0	118	148	0	0	128	159	141
ASV89	d__Bacteria; p__Bacteroidota; c__Bacteroidia; o__Bacteroidales; f__F082; g__norank; s__uncultured rumen bacterium	6	8	0	5	11	0	0	0	0	0	109	0	219	0	35	0	0	111	135	0	0	17	186	263
ASV90	d__Bacteria; p__Firmicutes; c__Negativicutes; o__Veillonellales-Selenomonadales; f__Selenomonadaceae; g__Schwartzia; s__uncultured bacterium	41	56	18	38	53	31	72	39	29	14	40	29	37	58	25	34	56	45	84	60	86	32	47	33
ASV91	d__Bacteria; p__Bacteroidota; c__Bacteroidia; o__Bacteroidales; f__Prevotellaceae; g__Prevotellaceae UCG-003; s__uncultured bacterium	25	85	75	0	0	0	50	14	0	20	0	49	63	0	48	38	0	56	55	81	48	69	140	175
ASV92	d__Bacteria; p__Bacteroidota; c__Bacteroidia; o__Bacteroidales; f__p-251-o5; g__norank; s__uncultured rumen bacterium	45	97	0	32	33	8	32	0	15	0	72	58	39	0	0	65	0	46	0	0	51	115	197	136
ASV93	d__Bacteria; p__Firmicutes; c__Clostridia; o__Oscillospirales; f__Oscillospiraceae; g__UCG-002; s__uncultured bacterium	28	17	56	0	33	0	30	9	0	7	66	37	62	14	51	92	16	64	99	78	83	66	65	91
ASV94	d__Bacteria; p__Bacteroidota; c__Bacteroidia; o__Bacteroidales; f__Prevotellaceae; g__Prevotella; s__uncultured rumen bacterium	0	61	58	0	0	0	66	0	0	0	129	150	79	0	0	0	0	59	0	219	0	49	217	66
ASV95	d__Bacteria; p__Firmicutes; c__Clostridia; o__Lachnospirales; f__Lachnospiraceae; g__Pseudobutyrivibrio; s__uncultured rumen bacterium	61	54	25	32	36	32	34	36	43	18	66	58	48	17	43	104	26	29	40	50	26	61	73	42
ASV96	d__Bacteria; p__Firmicutes; c__Clostridia; o__Oscillospirales; f__Oscillospiraceae; g__UCG-002; s__uncultured bacterium	108	0	0	26	35	19	28	28	0	0	72	0	67	0	35	53	18	79	155	0	60	36	82	93
ASV97	d__Bacteria; p__Firmicutes; c__Clostridia; o__Lachnospirales; f__Lachnospiraceae; g__uncultured; s__uncultured Lachnospiraceae bacterium	0	0	0	0	0	0	0	0	0	0	377	608	0	0	0	0	0	0	0	0	0	56	0	0
ASV98	d__Bacteria; p__Firmicutes; c__Negativicutes; o__Acidaminococcales; f__Acidaminococcaceae; g__Succiniclasticum; s__uncultured bacterium	0	0	0	0	0	97	0	51	110	97	0	0	0	277	0	0	300	0	0	0	0	0	0	0
ASV99	d__Bacteria; p__Bacteroidota; c__Bacteroidia; o__Bacteroidales; f__Prevotellaceae; g__Prevotella; s__uncultured bacterium	0	149	0	104	81	0	69	0	0	0	0	0	0	0	0	153	0	66	0	0	64	91	0	117
ASV100	d__Bacteria; p__Firmicutes; c__Clostridia; o__Oscillospirales; f__Oscillospiraceae; g__UCG-005; s__uncultured bacterium	32	30	166	18	26	0	0	38	0	0	63	41	84	0	48	17	0	62	66	36	39	54	127	69
ASV101	d__Bacteria; p__Bacteroidota; c__Bacteroidia; o__Bacteroidales; f__Prevotellaceae; g__Prevotella; s__uncultured bacterium	62	0	0	0	0	81	0	313	87	0	0	0	0	175	0	0	176	0	0	0	0	0	0	0
ASV102	d__Bacteria; p__Firmicutes; c__Negativicutes; o__Veillonellales-Selenomonadales; f__Selenomonadaceae; g__Selenomonas; s__Selenomonas ruminantium	0	66	37	36	33	0	62	0	0	30	98	108	64	0	77	57	0	35	102	105	30	0	59	31
ASV103	d__Bacteria; p__Bacteroidota; c__Bacteroidia; o__Bacteroidales; f__Prevotellaceae; g__Prevotella_7; s__uncultured bacterium	0	0	0	0	0	155	0	0	135	225	0	0	0	202	0	0	224	0	0	0	0	0	0	0
ASV104	d__Bacteria; p__Bacteroidota; c__Bacteroidia; o__Bacteroidales; f__Prevotellaceae; g__Prevotella; s__uncultured rumen bacterium	0	74	0	40	0	0	0	0	0	0	0	75	51	0	32	101	0	113	0	178	70	70	115	49
ASV105	d__Bacteria; p__Bacteroidota; c__Bacteroidia; o__Bacteroidales; f__Prevotellaceae; g__Prevotellaceae UCG-003; s__uncultured rumen bacterium	38	211	0	84	38	0	0	0	0	0	79	0	43	0	79	33	0	43	57	0	45	40	147	31
ASV106	d__Bacteria; p__Bacteroidota; c__Bacteroidia; o__Bacteroidales; f__Rikenellaceae; g__Rikenellaceae RC9 gut group; s__uncultured bacterium	10	55	107	0	31	0	0	0	0	0	78	32	104	0	139	28	0	60	73	123	20	0	97	69
ASV107	d__Bacteria; p__Bacteroidota; c__Bacteroidia; o__Bacteroidales; f__Prevotellaceae; g__Prevotella; s__Prevotella ruminicola 23	0	0	0	115	97	47	122	82	0	50	0	0	57	0	0	142	0	78	0	0	51	0	0	0
ASV108	d__Bacteria; p__Bacteroidota; c__Bacteroidia; o__Bacteroidales; f__Prevotellaceae; g__Prevotella; s__uncultured rumen bacterium	0	0	52	69	0	24	100	18	0	11	0	56	0	23	0	93	0	43	81	0	70	147	64	73
ASV109	d__Bacteria; p__Bacteroidota; c__Bacteroidia; o__Bacteroidales; f__Prevotellaceae; g__Prevotella; s__uncultured rumen bacterium	102	0	0	62	52	43	55	78	112	59	0	0	0	104	0	0	95	40	0	38	0	40	0	0
ASV110	d__Bacteria; p__Bacteroidota; c__Bacteroidia; o__Bacteroidales; f__Prevotellaceae; g__Prevotellaceae YAB2003 group; s__uncultured rumen bacterium	47	0	0	29	68	134	111	55	0	181	0	43	0	141	0	0	0	0	0	0	32	32	0	27
ASV111	d__Bacteria; p__Bacteroidota; c__Bacteroidia; o__Bacteroidales; f__Prevotellaceae; g__Prevotella; s__uncultured bacterium	0	143	0	53	0	28	76	102	33	0	0	94	0	0	0	76	0	74	0	0	76	85	0	0
ASV112	d__Bacteria; p__Bacteroidota; c__Bacteroidia; o__Bacteroidales; f__Prevotellaceae; g__Prevotella; s__uncultured rumen bacterium	0	112	27	4	7	0	41	4	0	0	79	85	37	0	14	44	0	21	70	131	24	37	68	163
ASV113	d__Bacteria; p__Firmicutes; c__Clostridia; o__Oscillospirales; f__Ruminococcaceae; g__Ruminococcus; s__uncultured bacterium	41	11	26	28	116	28	27	37	24	0	79	55	45	38	61	7	74	9	16	59	34	15	0	16
ASV114	d__Bacteria; p__Bacteroidota; c__Bacteroidia; o__Bacteroidales; f__Prevotellaceae; g__Prevotella; s__uncultured rumen bacterium	27	99	80	30	21	0	0	0	0	0	0	118	34	0	0	70	0	74	48	153	10	27	53	30
ASV115	d__Bacteria; p__Bacteroidota; c__Bacteroidia; o__Bacteroidales; f__Prevotellaceae; g__Prevotella; s__uncultured bacterium	495	0	0	44	24	0	23	0	0	0	0	0	0	0	0	0	0	0	22	0	176	12	0	0
ASV116	d__Bacteria; p__Bacteroidota; c__Bacteroidia; o__Bacteroidales; f__Rikenellaceae; g__Rikenellaceae RC9 gut group; s__uncultured rumen bacterium	103	26	0	37	25	26	21	83	19	0	56	34	35	18	38	30	30	72	76	66	34	26	21	0
ASV117	d__Bacteria; p__Bacteroidota; c__Bacteroidia; o__Bacteroidales; f__Prevotellaceae; g__Prevotella; s__uncultured rumen bacterium	41	64	128	39	25	0	49	0	0	0	0	15	43	0	42	72	0	36	45	91	30	32	106	45
ASV118	d__Bacteria; p__Firmicutes; c__Clostridia; o__Oscillospirales; f__Oscillospiraceae; g__NK4A214 group; s__uncultured bacterium	16	74	110	0	9	0	20	0	0	0	47	49	52	0	122	24	0	51	46	103	27	61	80	69
ASV119	d__Bacteria; p__Bacteroidota; c__Bacteroidia; o__Bacteroidales; f__Prevotellaceae; g__Prevotella; s__uncultured bacterium	0	0	89	46	0	46	0	119	0	0	0	101	0	74	0	0	0	44	0	0	0	174	108	0
ASV120	d__Bacteria; p__Bacteroidota; c__Bacteroidia; o__Bacteroidales; f__Prevotellaceae; g__Prevotellaceae UCG-001; s__uncultured bacterium	28	61	76	0	19	0	36	0	0	0	51	42	35	0	34	39	0	77	66	53	23	167	59	14
ASV121	d__Bacteria; p__Bacteroidota; c__Bacteroidia; o__Bacteroidales; f__Bacteroidales RF16 group; g__norank; s__uncultured rumen bacterium	23	41	49	20	30	0	72	25	0	15	72	48	114	0	0	38	12	39	55	65	40	39	0	62
ASV122	d__Bacteria; p__Firmicutes; c__Clostridia; o__Lachnospirales; f__Lachnospiraceae; g__Oribacterium; s__uncultured rumen bacterium	14	38	11	15	44	10	58	32	16	9	62	77	44	12	55	70	0	32	58	33	59	33	27	44
ASV123	d__Bacteria; p__Firmicutes; c__Clostridia; o__Lachnospirales; f__Lachnospiraceae; g__Pseudobutyrivibrio	63	36	85	36	28	0	0	34	0	22	73	75	49	14	100	57	0	0	0	68	43	45	0	34
ASV124	d__Bacteria; p__Bacteroidota; c__Bacteroidia; o__Bacteroidales; f__Prevotellaceae; g__Prevotella; s__uncultured rumen bacterium	94	0	0	13	77	37	174	156	49	118	0	26	0	0	0	0	23	0	0	0	16	18	0	0
ASV125	d__Bacteria; p__Bacteroidota; c__Bacteroidia; o__Bacteroidales; f__Muribaculaceae; g__norank; s__uncultured rumen bacterium	0	0	26	38	0	13	0	0	0	0	0	0	92	60	144	42	0	48	147	0	64	89	0	73
ASV126	d__Bacteria; p__Cyanobacteria; c__Cyanobacteriia; o__Chloroplast; f__norank; g__norank	57	20	9	39	56	36	86	36	41	15	30	23	13	54	43	24	59	61	30	28	16	0	28	24
ASV127	d__Bacteria; p__Bacteroidota; c__Bacteroidia; o__Bacteroidales; f__Rikenellaceae; g__Rikenellaceae RC9 gut group; s__uncultured bacterium	70	27	20	26	55	19	28	20	0	15	50	41	72	11	64	0	0	45	55	18	51	33	81	24
ASV128	d__Bacteria; p__Firmicutes; c__Clostridia; o__Oscillospirales; f__Oscillospiraceae; g__NK4A214 group; s__uncultured rumen bacterium	54	13	15	13	32	0	0	33	0	0	21	30	47	9	27	68	0	47	86	66	78	54	21	54
ASV129	d__Bacteria; p__Bacteroidota; c__Bacteroidia; o__Bacteroidales; f__Muribaculaceae; g__norank; s__uncultured bacterium	0	41	67	20	37	11	17	0	0	0	0	42	63	0	139	126	0	32	47	0	77	47	32	31
ASV130	d__Bacteria; p__Bacteroidota; c__Bacteroidia; o__Bacteroidales; f__Prevotellaceae; g__Prevotella; s__uncultured rumen bacterium	0	0	0	55	0	39	0	82	67	117	0	0	0	40	0	81	0	0	0	0	73	135	0	59
ASV131	d__Bacteria; p__Firmicutes; c__Negativicutes; o__Acidaminococcales; f__Acidaminococcaceae; g__Succiniclasticum; s__uncultured rumen bacterium	0	0	49	27	51	0	0	0	0	0	0	51	53	0	0	68	0	116	135	0	111	0	91	0
ASV132	d__Bacteria; p__Bacteroidota; c__Bacteroidia; o__Bacteroidales; f__Prevotellaceae; g__Prevotella; s__uncultured bacterium	53	21	13	29	10	0	82	0	0	14	50	51	57	0	28	52	0	9	0	13	89	120	6	23
ASV133	d__Bacteria; p__Bacteroidota; c__Bacteroidia; o__Bacteroidales; f__Prevotellaceae; g__Prevotella; s__uncultured rumen bacterium	7	51	23	17	10	0	21	10	0	0	69	66	51	0	17	59	0	70	60	47	23	84	69	34
ASV134	d__Bacteria; p__Bacteroidota; c__Bacteroidia; o__Bacteroidales; f__Bacteroidales RF16 group; g__norank; s__uncultured rumen bacterium	40	37	33	17	25	0	0	0	0	0	79	69	106	0	0	59	0	40	53	0	58	41	0	64
ASV135	d__Bacteria; p__Firmicutes; c__Clostridia; o__Clostridia UCG-014; f__norank; g__norank	69	35	0	31	47	35	35	54	0	24	0	0	99	20	0	63	0	51	76	0	30	0	0	0
ASV136	d__Bacteria; p__Bacteroidota; c__Bacteroidia; o__Bacteroidales; f__Prevotellaceae; g__Prevotellaceae YAB2003 group; s__uncultured bacterium	0	13	0	69	53	59	0	73	0	88	0	0	0	122	0	0	176	7	0	0	0	0	0	0
ASV137	d__Bacteria; p__Bacteroidota; c__Bacteroidia; o__Bacteroidales; f__Prevotellaceae; g__Prevotellaceae YAB2003 group; s__uncultured rumen bacterium	0	0	0	57	61	180	140	0	217	65	0	0	0	0	0	0	0	0	0	0	26	0	0	0
ASV138	d__Bacteria; p__Bacteroidota; c__Bacteroidia; o__Bacteroidales; f__Prevotellaceae; g__Prevotella	65	0	0	78	72	50	48	39	0	45	0	0	0	27	0	120	29	0	27	0	29	34	0	8
ASV139	d__Bacteria; p__Bacteroidota; c__Bacteroidia; o__Bacteroidales; f__Prevotellaceae; g__Prevotella	50	26	0	11	23	70	24	59	75	0	38	0	45	35	20	43	22	34	33	40	22	19	30	13
ASV140	d__Bacteria; p__Firmicutes; c__Clostridia; o__Lachnospirales; f__Lachnospiraceae; g__Lachnospiraceae AC2044 group; s__uncultured rumen bacterium	46	14	75	36	0	0	46	0	0	0	0	14	45	4	0	42	0	59	47	150	59	55	45	29
ASV141	d__Bacteria; p__Bacteroidota; c__Bacteroidia; o__Bacteroidales; f__Prevotellaceae; g__Prevotella; s__uncultured rumen bacterium	0	93	90	0	0	0	0	0	0	0	92	167	58	0	15	0	0	37	0	98	8	0	11	97
ASV142	d__Bacteria; p__Firmicutes; c__Negativicutes; o__Veillonellales-Selenomonadales; f__Selenomonadaceae; g__Anaerovibrio	26	60	20	18	25	5	50	14	0	0	64	61	35	0	46	37	0	44	35	65	27	44	72	28
ASV143	d__Bacteria; p__Firmicutes; c__Clostridia; o__Clostridia UCG-014; f__norank; g__norank; s__uncultured bacterium	52	0	0	31	64	133	33	16	142	72	0	0	0	67	0	0	68	0	0	0	0	0	0	0
ASV144	d__Bacteria; p__Firmicutes; c__Clostridia; o__Oscillospirales; f__Oscillospiraceae; g__NK4A214 group; s__uncultured rumen bacterium	0	34	0	29	0	30	0	0	0	0	0	141	35	0	46	0	74	0	66	0	136	19	37	25
ASV145	d__Bacteria; p__Bacteroidota; c__Bacteroidia; o__Bacteroidales; f__F082; g__norank; s__uncultured rumen bacterium	0	42	54	0	0	0	0	0	0	0	36	26	101	0	0	46	0	62	46	116	27	57	39	85
ASV146	d__Bacteria; p__Bacteroidota; c__Bacteroidia; o__Bacteroidales; f__Bacteroidales RF16 group; g__norank; s__uncultured rumen bacterium	0	54	74	16	23	0	26	0	0	0	132	0	102	0	74	0	0	61	0	0	0	42	88	64
ASV147	d__Bacteria; p__Bacteroidota; c__Bacteroidia; o__Bacteroidales; f__Prevotellaceae; g__Prevotella; s__uncultured rumen bacterium	84	0	0	62	38	32	37	76	0	64	0	28	0	103	0	0	69	0	18	0	24	0	32	0
ASV148	d__Bacteria; p__Firmicutes; c__Clostridia; o__Lachnospirales; f__Lachnospiraceae; g__[Eubacterium] ruminantium group; s__uncultured bacterium	25	13	0	34	20	120	0	32	73	0	89	0	0	28	42	32	33	5	21	75	22	32	0	0
ASV149	d__Bacteria; p__Bacteroidota; c__Bacteroidia; o__Bacteroidales; f__Prevotellaceae; g__Prevotella; s__uncultured rumen bacterium	0	50	0	0	0	0	49	0	0	0	54	57	53	0	78	70	0	55	0	99	42	59	0	45
ASV150	d__Bacteria; p__Bacteroidota; c__Bacteroidia; o__Bacteroidales; f__F082; g__norank; s__uncultured rumen bacterium	170	0	0	106	26	14	7	25	17	46	0	0	0	27	0	72	23	10	10	0	32	17	0	4
ASV151	d__Bacteria; p__Firmicutes; c__Clostridia; o__Oscillospirales; f__[Eubacterium] coprostanoligenes group; g__norank; s__uncultured bacterium	39	88	45	15	4	8	18	9	11	0	24	22	23	9	81	53	0	36	41	101	6	16	54	20
ASV152	d__Bacteria; p__Bacteroidota; c__Bacteroidia; o__Bacteroidales; f__Muribaculaceae; g__norank; s__uncultured rumen bacterium	0	0	0	0	0	0	0	68	0	0	100	0	54	57	100	0	0	70	93	0	129	0	0	0
ASV153	d__Bacteria; p__Firmicutes; c__Clostridia; o__Oscillospirales; f__Oscillospiraceae; g__UCG-005	85	0	0	38	0	0	0	203	18	0	0	0	50	0	0	25	0	36	0	0	65	34	33	0
ASV154	d__Bacteria; p__Bacteroidota; c__Bacteroidia; o__Bacteroidales; f__Rikenellaceae; g__Rikenellaceae RC9 gut group; s__uncultured rumen bacterium	0	41	0	0	16	0	16	20	0	0	53	25	50	0	84	36	0	35	73	70	16	37	78	48
ASV155	d__Bacteria; p__Bacteroidota; c__Bacteroidia; o__Bacteroidales; f__Prevotellaceae; g__Prevotella; s__uncultured rumen bacterium	17	55	86	13	0	0	35	37	0	0	52	35	51	0	9	43	0	54	31	57	33	32	44	0
ASV156	d__Bacteria; p__Bacteroidota; c__Bacteroidia; o__Bacteroidales; f__F082; g__norank; s__uncultured rumen bacterium	44	26	67	79	27	0	32	12	0	0	46	0	100	0	0	0	0	35	48	0	0	42	32	68
ASV157	d__Bacteria; p__Bacteroidota; c__Bacteroidia; o__Bacteroidales; f__Prevotellaceae; g__Prevotella; s__uncultured rumen bacterium	96	0	0	30	0	197	0	0	232	57	0	0	0	62	0	0	0	0	0	0	0	0	0	0
ASV158	d__Bacteria; p__Bacteroidota; c__Bacteroidia; o__Bacteroidales; f__Prevotellaceae; g__Prevotella; s__uncultured rumen bacterium	52	0	21	54	16	18	131	167	0	47	0	0	18	4	0	14	0	6	16	0	41	21	0	0
ASV159	d__Bacteria; p__Firmicutes; c__Clostridia; o__Lachnospirales; f__Lachnospiraceae; g__Lachnoclostridium	48	0	0	28	17	123	6	31	159	90	17	21	19	33	0	0	39	0	0	0	12	4	0	8
ASV160	d__Bacteria; p__Bacteroidota; c__Bacteroidia; o__Bacteroidales; f__Prevotellaceae; g__Prevotella; s__uncultured rumen bacterium	113	0	0	64	0	37	88	68	0	72	0	0	0	92	0	0	0	0	0	0	66	0	0	0
ASV161	d__Bacteria; p__Firmicutes; c__Clostridia; o__Lachnospirales; f__Lachnospiraceae; g__[Eubacterium] ruminantium group; s__uncultured rumen bacterium	31	0	0	8	70	33	57	30	45	12	0	0	0	21	47	43	32	0	46	0	52	89	0	0
ASV162	d__Bacteria; p__Bacteroidota; c__Bacteroidia; o__Bacteroidales; f__Rikenellaceae; g__Rikenellaceae RC9 gut group; s__uncultured bacterium	0	103	37	0	0	0	0	0	0	0	38	18	45	0	36	0	0	23	111	95	4	0	221	26
ASV163	d__Bacteria; p__Bacteroidota; c__Bacteroidia; o__Bacteroidales; f__Prevotellaceae; g__Prevotellaceae UCG-003; s__uncultured bacterium	0	101	0	0	0	0	0	0	0	0	75	44	38	0	45	36	0	21	20	0	0	28	79	158
ASV164	d__Bacteria; p__Firmicutes; c__Negativicutes; o__Acidaminococcales; f__Acidaminococcaceae; g__Succiniclasticum; s__uncultured rumen bacterium	15	20	7	27	37	0	0	18	0	0	17	14	0	14	11	36	0	72	96	19	92	17	60	21
ASV165	d__Bacteria; p__Bacteroidota; c__Bacteroidia; o__Bacteroidales; f__Prevotellaceae; g__Prevotellaceae UCG-001; s__uncultured rumen bacterium	0	66	74	0	0	0	0	0	0	0	86	0	54	0	92	0	0	40	38	0	0	104	67	37
ASV166	d__Bacteria; p__Bacteroidota; c__Bacteroidia; o__Bacteroidales; f__Prevotellaceae; g__Prevotella; s__uncultured rumen bacterium	0	84	22	0	19	0	36	0	0	0	0	51	30	0	17	97	0	81	0	91	15	43	63	0
ASV167	d__Bacteria; p__Bacteroidota; c__Bacteroidia; o__Bacteroidales; f__Rikenellaceae; g__Rikenellaceae RC9 gut group; s__uncultured rumen bacterium	29	18	32	36	52	15	37	22	20	8	38	23	34	0	0	34	8	23	30	0	38	30	0	54
ASV168	d__Bacteria; p__Firmicutes; c__Negativicutes; o__Veillonellales-Selenomonadales; f__Selenomonadaceae; g__Selenomonas	92	0	0	16	75	44	0	36	46	53	0	0	0	108	0	0	97	0	0	0	0	0	0	0
ASV169	d__Bacteria; p__Bacteroidota; c__Bacteroidia; o__Bacteroidales; f__p-2534-18B5 gut group; g__norank; s__uncultured rumen bacterium	98	0	0	44	46	38	0	81	30	24	0	0	0	21	0	89	1	0	0	0	89	0	0	0
ASV170	d__Bacteria; p__Firmicutes; c__Negativicutes; o__Veillonellales-Selenomonadales; f__Selenomonadaceae	48	0	0	10	53	122	0	13	140	16	0	0	0	54	0	0	64	0	0	0	35	0	0	0
ASV171	d__Bacteria; p__Bacteroidota; c__Bacteroidia; o__Bacteroidales; f__Muribaculaceae; g__norank; s__uncultured rumen bacterium	16	33	49	6	17	9	0	0	0	0	32	42	111	0	103	28	0	35	35	0	16	65	32	23
ASV172	d__Bacteria; p__Bacteroidota; c__Bacteroidia; o__Bacteroidales; f__Prevotellaceae; g__Prevotellaceae UCG-003; s__uncultured rumen bacterium	15	75	86	0	0	18	0	8	0	0	56	21	19	14	0	38	0	36	50	73	0	66	0	48
ASV173	d__Bacteria; p__Bacteroidota; c__Bacteroidia; o__Bacteroidales; f__Prevotellaceae; g__Prevotella; s__uncultured bacterium	0	72	51	0	0	0	0	0	0	0	48	43	52	0	36	60	0	82	74	62	27	0	0	0
ASV174	d__Bacteria; p__Bacteroidota; c__Bacteroidia; o__Bacteroidales; f__Prevotellaceae	26	0	0	58	0	75	66	0	0	52	0	12	18	50	0	17	39	0	17	0	33	27	0	56
ASV175	d__Bacteria; p__Bacteroidota; c__Bacteroidia; o__Bacteroidales; f__Rikenellaceae; g__Rikenellaceae RC9 gut group; s__uncultured rumen bacterium	42	0	0	17	34	0	0	24	14	21	23	13	20	30	15	42	26	20	28	0	134	34	13	11
ASV176	d__Bacteria; p__Bacteroidota; c__Bacteroidia; o__Bacteroidales; f__F082; g__norank; s__uncultured rumen bacterium	51	0	0	103	84	6	51	88	0	0	0	0	0	0	0	0	0	33	58	0	46	0	0	0
ASV177	d__Bacteria; p__Bacteroidota; c__Bacteroidia; o__Bacteroidales; f__Prevotellaceae; g__Prevotella; s__uncultured rumen bacterium	0	125	0	0	40	0	0	0	0	0	0	0	41	0	0	108	0	98	0	134	0	0	0	0
ASV178	d__Bacteria; p__Firmicutes; c__Clostridia; o__Lachnospirales; f__Lachnospiraceae; g__Lachnospiraceae NK4A136 group; s__uncultured rumen bacterium	61	17	27	40	5	0	10	31	0	17	34	29	25	20	47	23	31	20	33	22	54	38	0	0
ASV179	d__Bacteria; p__Firmicutes; c__Clostridia; o__Oscillospirales; f__Ruminococcaceae; g__Ruminococcus; s__uncultured bacterium	130	0	0	90	54	16	35	55	0	30	0	0	0	21	0	15	47	0	0	0	0	0	0	10
ASV180	d__Bacteria; p__Firmicutes; c__Clostridia; o__Lachnospirales; f__Lachnospiraceae; g__Butyrivibrio; s__uncultured rumen bacterium	60	0	46	53	47	0	0	69	0	0	75	0	57	0	0	41	22	0	0	0	58	0	0	0
ASV181	d__Bacteria; p__Bacteroidota; c__Bacteroidia; o__Bacteroidales; f__F082; g__norank; s__uncultured bacterium	0	19	86	0	0	0	0	0	0	0	53	52	45	0	74	8	0	60	73	39	0	38	40	44
ASV182	d__Bacteria; p__Firmicutes; c__Clostridia; o__Lachnospirales; f__Lachnospiraceae; g__Lachnospiraceae NK4A136 group	76	0	0	41	75	59	26	33	49	0	0	7	28	27	0	0	38	0	0	0	41	5	0	0
ASV183	d__Bacteria; p__Bacteroidota; c__Bacteroidia; o__Bacteroidales; f__Prevotellaceae; g__Prevotellaceae UCG-004	52	0	27	0	26	34	56	53	34	0	0	21	36	14	0	23	0	0	13	12	0	49	0	81
ASV184	d__Bacteria; p__Firmicutes; c__Negativicutes; o__Veillonellales-Selenomonadales; f__Veillonellaceae; g__Megasphaera; s__Megasphaera elsdenii DSM 20460	62	3	0	47	21	18	0	0	0	24	0	8	0	90	0	0	148	0	0	5	80	0	0	0
ASV185	d__Bacteria; p__Firmicutes; c__Clostridia; o__Peptostreptococcales-Tissierellales; f__Anaerovoracaceae; g__Anaerovorax; s__uncultured bacterium	32	32	38	15	0	4	0	14	0	0	43	22	27	0	105	0	0	23	48	65	22	33	52	32
ASV186	d__Bacteria; p__Bacteroidota; c__Bacteroidia; o__Bacteroidales; f__Bacteroidales RF16 group; g__norank	5	39	22	0	16	0	0	62	0	0	42	39	54	0	64	29	0	21	20	45	16	39	17	38
ASV187	d__Bacteria; p__Bacteroidota; c__Bacteroidia; o__Bacteroidales; f__F082; g__norank; s__uncultured bacterium	0	40	46	6	0	0	0	0	0	0	53	38	86	0	111	33	0	26	42	83	0	21	0	22
ASV188	d__Bacteria; p__Bacteroidota; c__Bacteroidia; o__Bacteroidales; f__Rikenellaceae; g__Rikenellaceae RC9 gut group; s__uncultured bacterium	0	0	54	0	0	0	0	0	0	0	69	23	74	0	141	24	0	58	46	0	0	42	59	37
ASV189	d__Bacteria; p__Bacteroidota; c__Bacteroidia; o__Bacteroidales; f__Muribaculaceae; g__norank; s__uncultured bacterium	18	18	36	50	13	0	44	0	0	0	0	14	29	44	28	32	0	7	21	0	79	23	0	31
ASV190	d__Bacteria; p__Firmicutes; c__Clostridia; o__Lachnospirales; f__Lachnospiraceae; g__[Ruminococcus] gauvreauii group; s__uncultured bacterium	0	35	0	0	0	0	25	0	0	0	34	9	0	0	72	76	0	55	105	75	0	0	112	47
ASV191	d__Bacteria; p__Firmicutes; c__Clostridia; o__Lachnospirales; f__Lachnospiraceae; g__[Eubacterium] ruminantium group	37	17	47	25	0	0	34	0	0	0	0	43	35	21	51	0	24	27	61	0	25	51	71	0
ASV192	d__Bacteria; p__Firmicutes; c__Clostridia; o__Clostridia UCG-014; f__norank; g__norank; s__uncultured rumen bacterium	51	23	0	23	9	17	19	61	0	8	26	28	14	5	23	44	9	12	0	91	36	8	31	24
ASV193	d__Bacteria; p__Bacteroidota; c__Bacteroidia; o__Bacteroidales; f__Prevotellaceae; g__Prevotella; s__uncultured rumen bacterium	0	65	129	19	20	0	23	9	0	0	32	40	30	0	10	20	0	14	0	0	10	11	0	99
ASV194	d__Bacteria; p__Bacteroidota; c__Bacteroidia; o__Bacteroidales; f__Prevotellaceae; g__Prevotella; s__uncultured rumen bacterium	19	84	0	43	0	15	55	23	22	0	0	39	35	12	0	24	21	35	0	74	0	0	0	31
ASV195	d__Bacteria; p__Bacteroidota; c__Bacteroidia; o__Bacteroidales; f__Prevotellaceae; g__Prevotella	0	52	38	0	0	0	0	0	0	0	66	78	45	0	0	53	0	40	0	0	0	45	70	45
ASV196	d__Bacteria; p__Bacteroidota; c__Bacteroidia; o__Bacteroidales; f__Prevotellaceae; g__Prevotella; s__uncultured bacterium	23	13	22	28	43	0	22	36	0	6	19	13	20	9	0	63	0	10	27	0	58	16	11	31
ASV197	d__Bacteria; p__Bacteroidota; c__Bacteroidia; o__Bacteroidales; f__Prevotellaceae; g__Prevotella; s__uncultured rumen bacterium	0	32	0	56	40	0	0	0	0	0	0	0	0	0	0	80	0	48	54	0	73	0	98	0
ASV198	d__Bacteria; p__Bacteroidota; c__Bacteroidia; o__Bacteroidales; f__Prevotellaceae; g__Prevotella; s__uncultured rumen bacterium	0	0	44	0	0	0	0	0	0	0	0	0	54	0	0	92	0	80	0	0	0	70	119	88
ASV199	d__Bacteria; p__Firmicutes; c__Clostridia; o__Oscillospirales; f__Ruminococcaceae; g__Ruminococcus	130	0	0	83	22	34	0	110	44	0	0	0	0	0	0	0	0	0	0	0	24	0	0	0
ASV200	d__Bacteria; p__Firmicutes; c__Clostridia; o__Lachnospirales; f__Lachnospiraceae; g__[Eubacterium] ventriosum group	87	0	28	57	16	16	30	37	28	12	19	10	18	29	0	0	43	0	0	0	45	0	0	0
ASV201	d__Bacteria; p__Firmicutes; c__Clostridia; o__Lachnospirales; f__Lachnospiraceae; g__Moryella; s__uncultured rumen bacterium	24	30	0	10	14	18	0	32	27	0	24	22	0	10	36	20	22	18	26	45	29	43	41	36
ASV202	d__Bacteria; p__Bacteroidota; c__Bacteroidia; o__Bacteroidales; f__Prevotellaceae; g__Prevotellaceae UCG-004	0	81	69	0	0	0	0	0	0	0	50	57	52	0	0	0	0	26	0	0	0	38	68	62
ASV203	d__Bacteria; p__Proteobacteria; c__Gammaproteobacteria; o__Enterobacterales; f__Succinivibrionaceae; g__Succinivibrionaceae UCG-002; s__uncultured rumen bacterium	0	0	39	0	14	0	68	0	0	0	77	47	118	0	0	17	0	33	0	0	0	32	12	75
ASV204	d__Bacteria; p__Bacteroidota; c__Bacteroidia; o__Bacteroidales; f__Bacteroidales UCG-001; g__norank; s__uncultured rumen bacterium	13	14	18	37	0	0	17	81	10	18	14	8	11	10	0	28	10	42	28	39	11	24	12	35
ASV205	d__Bacteria; p__Firmicutes; c__Clostridia; o__Oscillospirales; f__Oscillospiraceae; g__NK4A214 group; s__uncultured bacterium	0	68	0	0	0	18	0	0	21	0	0	0	49	0	38	37	0	77	118	103	0	0	0	0
ASV206	d__Bacteria; p__Bacteroidota; c__Bacteroidia; o__Bacteroidales; f__Prevotellaceae; g__Prevotellaceae UCG-003	41	50	36	24	21	0	28	0	0	0	25	18	16	19	9	25	2	19	20	0	7	95	20	37
ASV207	d__Bacteria; p__Bacteroidota; c__Bacteroidia; o__Bacteroidales; f__Prevotellaceae; g__Prevotella; s__uncultured rumen bacterium	36	0	0	46	37	0	0	50	0	32	0	0	0	0	0	81	0	0	33	0	56	62	0	0
ASV208	d__Bacteria; p__Firmicutes; c__Clostridia; o__Lachnospirales; f__Lachnospiraceae; g__Lachnospiraceae NK3A20 group; s__uncultured rumen bacterium	9	31	50	0	0	0	0	18	0	0	0	27	12	0	0	0	0	147	47	33	0	18	70	40
ASV209	d__Bacteria; p__Bacteroidota; c__Bacteroidia; o__Bacteroidales; f__Prevotellaceae; g__Prevotella; s__uncultured rumen bacterium	0	48	37	43	45	0	0	0	0	0	0	0	0	0	51	0	0	0	0	0	52	97	58	37
ASV210	d__Bacteria; p__Bacteroidota; c__Bacteroidia; o__Bacteroidales; f__Prevotellaceae; g__Prevotella; s__uncultured bacterium	0	43	68	0	42	0	48	0	0	0	34	93	19	0	6	0	0	0	14	0	29	34	0	38
ASV211	d__Bacteria; p__Bacteroidota; c__Bacteroidia; o__Bacteroidales; f__Prevotellaceae; g__Prevotella; s__uncultured bacterium	35	15	7	30	56	22	50	0	16	29	0	14	0	42	0	0	25	13	22	0	48	34	26	0
ASV212	d__Bacteria; p__Bacteroidota; c__Bacteroidia; o__Bacteroidales; f__Prevotellaceae; g__Prevotellaceae UCG-001; s__uncultured bacterium	62	40	0	32	42	0	29	0	0	4	18	20	8	3	0	32	0	4	0	38	7	79	22	19
ASV213	d__Bacteria; p__Bacteroidota; c__Bacteroidia; o__Bacteroidales; f__Rikenellaceae; g__Rikenellaceae RC9 gut group; s__uncultured bacterium	32	15	29	9	21	0	0	19	0	0	25	21	27	0	46	21	0	29	43	0	42	36	47	41
ASV214	d__Bacteria; p__Bacteroidota; c__Bacteroidia; o__Bacteroidales; f__uncultured; g__norank; s__uncultured rumen bacterium	53	47	25	41	34	9	0	13	11	19	0	0	28	0	0	13	0	0	36	0	0	46	0	78
ASV215	d__Bacteria; p__Firmicutes; c__Negativicutes; o__Veillonellales-Selenomonadales; f__Selenomonadaceae; g__Selenomonas; s__uncultured rumen bacterium	72	0	0	0	72	45	0	38	0	32	0	0	0	98	0	0	81	0	0	0	0	0	0	0
ASV216	d__Bacteria; p__Firmicutes; c__Clostridia; o__Oscillospirales; f__Hungateiclostridiaceae; g__Saccharofermentans; s__uncultured rumen bacterium	28	0	21	24	39	12	0	27	0	22	34	0	0	0	64	0	20	0	56	36	18	42	0	25
ASV217	d__Bacteria; p__Firmicutes; c__Clostridia; o__Oscillospirales; f__Oscillospiraceae; g__NK4A214 group; s__uncultured bacterium	0	0	0	23	23	0	0	0	0	0	0	38	0	0	0	0	0	48	0	0	0	90	132	112
ASV218	d__Bacteria; p__Firmicutes; c__Clostridia; o__Lachnospirales; f__Lachnospiraceae; g__Roseburia; s__uncultured bacterium	37	0	0	15	0	113	0	0	147	53	0	0	0	0	0	0	62	0	0	0	40	0	0	0
ASV219	d__Bacteria; p__Bacteroidota; c__Bacteroidia; o__Bacteroidales; f__Prevotellaceae; g__Prevotella; s__uncultured bacterium	0	0	0	26	60	0	20	0	0	0	0	0	0	0	0	61	0	40	0	0	22	50	114	32
ASV220	d__Bacteria; p__Firmicutes; c__Clostridia; o__Lachnospirales; f__Lachnospiraceae	15	0	0	22	32	66	32	22	84	14	0	0	22	26	0	39	54	0	0	0	32	0	0	0
ASV221	d__Bacteria; p__Firmicutes; c__Clostridia; o__Oscillospirales; f__Oscillospiraceae; g__NK4A214 group; s__uncultured rumen bacterium	0	0	0	0	0	0	0	0	0	0	0	91	0	0	88	0	0	42	221	0	0	0	106	0
ASV222	d__Bacteria; p__Firmicutes; c__Bacilli; o__Acholeplasmatales; f__Acholeplasmataceae; g__Anaeroplasma; s__uncultured rumen bacterium	6	33	0	7	10	0	20	0	0	0	43	35	50	0	61	22	0	32	44	0	32	32	43	39
ASV223	d__Bacteria; p__Firmicutes; c__Clostridia; o__Oscillospirales; f__Oscillospiraceae; g__Papillibacter; s__uncultured rumen bacterium	0	36	67	13	11	0	0	27	0	11	24	21	36	0	25	28	0	21	23	47	12	45	21	29
ASV224	d__Bacteria; p__Firmicutes; c__Clostridia; o__Lachnospirales; f__Lachnospiraceae; g__[Eubacterium] ventriosum group; s__uncultured rumen bacterium	0	13	7	1	0	0	9	12	0	0	16	0	14	0	32	151	0	6	18	21	44	23	68	29
ASV225	d__Bacteria; p__Bacteroidota; c__Bacteroidia; o__Bacteroidales; f__Prevotellaceae; g__Prevotellaceae NK3B31 group; s__uncultured rumen bacterium	28	30	0	22	0	9	0	0	0	13	0	36	29	0	32	0	0	55	50	23	0	53	43	45
ASV226	d__Bacteria; p__Bacteroidota; c__Bacteroidia; o__Bacteroidales; f__Prevotellaceae; g__Prevotellaceae UCG-001; s__uncultured rumen bacterium	100	0	0	0	41	50	147	0	33	0	0	0	0	0	0	0	0	0	31	0	0	0	0	69
ASV227	d__Bacteria; p__Bacteroidota; c__Bacteroidia; o__Bacteroidales; f__Prevotellaceae; g__Prevotellaceae UCG-003; s__uncultured rumen bacterium	0	97	19	26	0	0	0	0	0	4	17	32	16	0	72	29	0	59	61	0	10	19	24	0
ASV228	d__Bacteria; p__Bacteroidota; c__Bacteroidia; o__Bacteroidales; f__Bacteroidales RF16 group; g__norank	0	15	28	0	0	0	0	26	0	0	0	48	39	0	0	81	0	0	51	78	34	0	32	35
ASV229	d__Bacteria; p__Firmicutes; c__Clostridia; o__Lachnospirales; f__Lachnospiraceae; g__[Eubacterium] ruminantium group; s__uncultured rumen bacterium	0	21	0	44	33	0	42	40	34	36	0	0	41	0	43	58	0	0	29	0	29	0	0	0
ASV230	d__Bacteria; p__Firmicutes; c__Clostridia; o__Oscillospirales; f__Ruminococcaceae; g__Ruminococcus; s__uncultured bacterium	0	0	0	31	43	5	48	0	0	0	55	0	24	0	91	35	0	43	31	0	0	33	38	37
ASV231	d__Bacteria; p__Fibrobacterota; c__Fibrobacteria; o__Fibrobacterales; f__Fibrobacteraceae; g__Fibrobacter	0	45	192	0	88	0	0	0	0	0	0	53	69	0	0	0	0	0	0	0	0	0	0	0
ASV232	d__Bacteria; p__Firmicutes; c__Clostridia; o__Oscillospirales; f__Butyricicoccaceae; g__UCG-009; s__uncultured bacterium	0	7	54	0	0	0	0	0	0	0	30	0	52	0	15	80	0	44	39	0	17	31	102	38
ASV233	d__Bacteria; p__Firmicutes; c__Clostridia; o__Oscillospirales; f__Oscillospiraceae; g__NK4A214 group; s__uncultured bacterium	0	42	58	0	0	0	0	0	0	0	0	0	99	0	108	0	0	0	0	0	0	50	127	55
ASV234	d__Bacteria; p__Firmicutes; c__Clostridia; o__Clostridia UCG-014; f__norank; g__norank; s__uncultured rumen bacterium	110	0	0	0	80	39	55	0	63	40	0	0	0	0	0	0	0	0	0	0	0	50	0	0
ASV235	d__Bacteria; p__Firmicutes; c__Clostridia; o__Lachnospirales; f__Lachnospiraceae; g__Coprococcus	125	0	0	16	30	38	16	58	49	0	0	0	0	33	0	0	38	0	0	0	24	0	0	0
ASV236	d__Bacteria; p__Firmicutes; c__Clostridia; o__Oscillospirales; f__Oscillospiraceae; g__NK4A214 group; s__uncultured rumen bacterium	21	11	0	6	21	43	10	62	32	10	28	21	34	6	41	16	0	18	14	9	20	19	6	25
ASV237	d__Bacteria; p__Bacteroidota; c__Bacteroidia; o__Bacteroidales; f__Prevotellaceae; g__Prevotellaceae Ga6A1 group; s__uncultured rumen bacterium	0	15	16	43	43	0	23	35	0	5	0	13	0	9	0	35	0	58	30	0	0	29	0	48
ASV238	d__Bacteria; p__Bacteroidota; c__Bacteroidia; o__Bacteroidales; f__Prevotellaceae; g__Prevotella; s__uncultured bacterium	0	0	234	0	0	0	0	0	0	0	0	254	0	0	0	0	0	0	0	0	0	0	0	0
ASV239	d__Bacteria; p__Bacteroidota; c__Bacteroidia; o__Bacteroidales; f__F082; g__norank; s__uncultured rumen bacterium	7	30	22	4	0	0	4	0	0	0	34	20	31	0	81	11	0	28	47	43	14	23	69	17
ASV240	d__Bacteria; p__Bacteroidota; c__Bacteroidia; o__Bacteroidales; f__F082; g__norank; s__uncultured bacterium	0	33	0	0	0	0	13	0	0	0	40	38	53	0	128	0	0	43	40	0	0	17	46	32
ASV241	d__Bacteria; p__Firmicutes; c__Clostridia; o__Lachnospirales; f__Lachnospiraceae; g__Lachnoclostridium; s__uncultured rumen bacterium	3	31	19	0	11	11	17	10	0	0	37	25	36	12	91	10	19	8	24	23	22	20	29	42
ASV242	d__Bacteria; p__Bacteroidota; c__Bacteroidia; o__Bacteroidales; f__Prevotellaceae; g__Prevotella; s__uncultured rumen bacterium	27	82	0	30	0	0	46	30	9	0	0	119	0	0	0	0	0	64	0	0	0	0	0	0
ASV243	d__Bacteria; p__Bacteroidota; c__Bacteroidia; o__Bacteroidales; f__F082; g__norank; s__uncultured rumen bacterium	0	14	0	21	48	0	0	0	0	0	79	44	46	0	39	0	27	11	72	0	16	17	7	21
ASV244	d__Bacteria; p__Bacteroidota; c__Bacteroidia; o__Bacteroidales; f__Prevotellaceae; g__Prevotella; s__uncultured rumen bacterium	0	0	0	0	43	0	0	0	18	0	81	0	96	0	117	0	0	0	0	150	0	0	0	0
ASV245	d__Bacteria; p__Bacteroidota; c__Bacteroidia; o__Bacteroidales; f__Prevotellaceae; g__Prevotella; s__uncultured rumen bacterium	41	0	0	109	47	0	34	0	0	0	0	0	0	17	0	44	0	25	18	0	27	0	38	0
ASV246	d__Bacteria; p__Bacteroidota; c__Bacteroidia; o__Bacteroidales; f__Prevotellaceae; g__Prevotella; s__uncultured bacterium	46	0	0	159	42	0	0	25	0	0	0	0	0	11	0	19	0	11	0	0	38	0	0	0
ASV247	d__Bacteria; p__Firmicutes; c__Clostridia; o__Lachnospirales; f__Lachnospiraceae; g__Lachnospiraceae AC2044 group	30	20	43	26	17	2	7	9	0	0	44	32	61	0	84	5	0	0	7	0	23	35	0	10
ASV248	d__Bacteria; p__Firmicutes; c__Negativicutes; o__Veillonellales-Selenomonadales; f__Selenomonadaceae; g__uncultured; s__uncultured rumen bacterium	85	0	0	0	95	0	0	0	0	0	0	0	0	104	0	0	105	0	0	0	0	0	0	0
ASV249	d__Bacteria; p__Firmicutes; c__Clostridia; o__Lachnospirales; f__Lachnospiraceae; g__Acetitomaculum; s__uncultured bacterium	29	0	70	15	0	10	0	11	0	0	20	8	0	18	0	19	0	62	51	0	29	11	56	28
ASV250	d__Bacteria; p__Bacteroidota; c__Bacteroidia; o__Bacteroidales; f__Prevotellaceae; g__Prevotella; s__uncultured bacterium	0	71	65	0	43	0	0	0	0	0	0	56	52	0	0	47	0	0	0	121	0	0	0	0
ASV251	d__Bacteria; p__Spirochaetota; c__Spirochaetia; o__Spirochaetales; f__Spirochaetaceae; g__Treponema; s__uncultured rumen bacterium	0	19	23	0	0	0	0	10	0	0	35	19	0	0	0	0	0	103	61	0	0	29	71	50
ASV252	d__Bacteria; p__Bacteroidota; c__Bacteroidia; o__Bacteroidales; f__Rikenellaceae; g__Rikenellaceae RC9 gut group; s__uncultured bacterium	49	0	0	29	15	12	0	26	23	7	0	0	38	0	16	0	0	43	52	0	29	20	32	16
ASV253	d__Bacteria; p__Firmicutes; c__Clostridia; o__Lachnospirales; f__Lachnospiraceae; g__Oribacterium; s__uncultured rumen bacterium	51	0	0	39	46	63	0	37	72	12	0	0	3	15	0	0	24	0	0	0	7	0	0	0
ASV254	d__Bacteria; p__Proteobacteria; c__Gammaproteobacteria; o__Enterobacterales; f__Succinivibrionaceae; g__Succinivibrio; s__uncultured bacterium	9	43	40	0	13	0	33	0	0	0	55	56	40	0	0	3	0	0	10	34	4	9	0	81
ASV255	d__Bacteria; p__Firmicutes; c__Clostridia; o__Clostridia UCG-014; f__norank; g__norank; s__uncultured rumen bacterium	17	27	18	14	7	0	27	42	0	0	18	0	30	0	0	25	5	17	38	0	53	17	12	32
ASV256	d__Bacteria; p__Bacteroidota; c__Bacteroidia; o__Bacteroidales; f__Prevotellaceae; g__Prevotella; s__uncultured bacterium	12	32	6	0	29	10	16	9	0	7	21	20	20	10	0	30	9	36	32	3	8	44	22	27
ASV257	d__Bacteria; p__Firmicutes; c__Clostridia; o__Lachnospirales; f__Lachnospiraceae; g__Butyrivibrio	23	21	0	18	14	15	0	34	0	0	18	0	19	14	29	40	0	11	19	24	32	18	26	30
ASV258	d__Bacteria; p__Bacteroidota; c__Bacteroidia; o__Bacteroidales; f__Prevotellaceae; g__Prevotellaceae UCG-001; s__uncultured rumen bacterium	22	25	19	23	0	0	19	0	0	0	35	24	25	5	20	20	0	38	23	32	0	36	23	29
ASV259	d__Bacteria; p__Bacteroidota; c__Bacteroidia; o__Bacteroidales; f__Prevotellaceae; g__Prevotella; s__uncultured bacterium	36	0	0	0	0	0	0	27	0	0	37	56	0	0	45	0	35	56	0	0	0	40	71	0
ASV260	d__Bacteria; p__Firmicutes; c__Clostridia; o__Clostridia UCG-014; f__norank; g__norank; s__uncultured bacterium	33	0	51	34	11	0	0	0	0	0	0	0	0	0	76	48	0	0	0	0	74	0	119	0
ASV261	d__Bacteria; p__Firmicutes; c__Clostridia; o__Lachnospirales; f__Lachnospiraceae	15	12	14	2	30	22	23	16	27	71	16	18	14	13	70	9	0	0	19	0	7	28	21	6
ASV262	d__Bacteria; p__Firmicutes; c__Clostridia; o__Lachnospirales; f__Lachnospiraceae; g__Marvinbryantia; s__uncultured rumen bacterium	0	21	0	0	0	0	0	0	0	0	36	40	18	0	55	0	0	40	48	0	0	53	48	81
ASV263	d__Bacteria; p__Bacteroidota; c__Bacteroidia; o__Bacteroidales; f__Prevotellaceae; g__Prevotella; s__uncultured rumen bacterium	59	0	0	0	0	0	0	0	0	0	0	0	0	0	13	160	0	0	135	0	0	0	0	73
ASV264	d__Bacteria; p__Spirochaetota; c__Spirochaetia; o__Spirochaetales; f__Spirochaetaceae; g__Treponema	5	10	0	25	13	24	15	80	20	15	17	14	0	9	9	18	18	39	17	0	0	0	16	17
ASV265	d__Bacteria; p__Firmicutes; c__Clostridia; o__Christensenellales; f__Christensenellaceae; g__Christensenellaceae R-7 group; s__uncultured bacterium	27	25	74	9	10	0	0	6	0	0	17	7	25	11	44	17	0	11	21	47	16	10	42	15
ASV266	d__Bacteria; p__Bacteroidota; c__Bacteroidia; o__Bacteroidales; f__Prevotellaceae; g__Prevotella; s__uncultured rumen bacterium	27	0	0	58	0	124	9	0	138	0	0	0	0	18	0	0	0	0	0	0	0	11	0	0
ASV267	d__Bacteria; p__Firmicutes; c__Negativicutes; o__Veillonellales-Selenomonadales; f__Selenomonadaceae; g__Selenomonas	35	0	0	15	11	33	0	29	71	19	0	4	0	63	0	0	90	0	0	0	6	0	0	0
ASV268	d__Bacteria; p__Bacteroidota; c__Bacteroidia; o__Bacteroidales; f__Prevotellaceae; g__Prevotellaceae UCG-001; s__uncultured rumen bacterium	0	24	27	0	0	0	0	78	0	10	0	96	33	0	0	0	5	0	0	0	0	52	0	40
ASV269	d__Bacteria; p__Firmicutes; c__Clostridia; o__Oscillospirales; f__Ruminococcaceae; g__Ruminococcus; s__uncultured bacterium	17	0	14	0	24	8	15	0	0	0	33	16	24	22	50	0	38	29	37	0	23	27	7	32
ASV270	d__Bacteria; p__Bacteroidota; c__Bacteroidia; o__Bacteroidales; f__Prevotellaceae; g__Prevotella; s__uncultured rumen bacterium	0	0	24	0	0	0	0	0	0	17	98	120	0	0	0	47	0	32	42	0	0	0	51	0
ASV271	d__Bacteria; p__Bacteroidota; c__Bacteroidia; o__Bacteroidales; f__Prevotellaceae; g__Prevotella; s__uncultured bacterium	11	92	0	16	0	0	48	0	0	0	41	32	30	0	0	16	0	18	5	76	0	21	9	0
ASV272	d__Bacteria; p__Firmicutes; c__Clostridia; o__Oscillospirales; f__Oscillospiraceae; g__NK4A214 group; s__uncultured rumen bacterium	66	0	85	22	20	0	0	48	0	10	0	0	0	0	26	0	0	0	38	0	43	41	0	0
ASV273	d__Bacteria; p__Firmicutes; c__Negativicutes; o__Acidaminococcales; f__Acidaminococcaceae; g__Succiniclasticum; s__uncultured bacterium	0	0	0	1	0	0	0	0	0	61	0	0	0	152	0	0	174	0	0	0	0	0	0	0
ASV274	d__Bacteria; p__Firmicutes; c__Clostridia; o__Christensenellales; f__Christensenellaceae; g__Christensenellaceae R-7 group; s__uncultured bacterium	9	33	0	0	14	0	25	0	0	0	0	0	16	5	40	0	11	33	52	0	14	31	51	66
ASV275	d__Bacteria; p__Bacteroidota; c__Bacteroidia; o__Bacteroidales; f__Muribaculaceae; g__norank; s__uncultured rumen bacterium	0	51	0	0	0	0	41	0	0	0	0	15	48	0	62	37	0	20	25	116	0	0	30	14
ASV276	d__Bacteria; p__Firmicutes; c__Clostridia; o__Peptostreptococcales-Tissierellales; f__Anaerovoracaceae; g__Family XIII AD3011 group; s__uncultured bacterium	0	28	31	13	10	0	0	10	0	0	35	0	42	0	65	0	0	11	0	59	0	52	0	56
ASV277	d__Bacteria; p__Firmicutes; c__Clostridia; o__Christensenellales; f__Christensenellaceae; g__Christensenellaceae R-7 group; s__uncultured rumen bacterium	49	0	81	0	17	0	0	13	0	0	0	0	0	0	0	64	0	0	37	0	40	27	70	0
ASV278	d__Bacteria; p__Bacteroidota; c__Bacteroidia; o__Bacteroidales; f__F082; g__norank; s__uncultured bacterium	0	18	0	0	0	0	0	0	0	0	34	23	37	0	105	19	0	52	40	28	5	25	25	18
ASV279	d__Bacteria; p__Firmicutes; c__Negativicutes; o__Veillonellales-Selenomonadales; f__Selenomonadaceae; g__Selenomonas	91	0	0	0	0	49	0	0	0	0	0	0	0	105	0	0	117	0	0	0	0	0	0	0
ASV280	d__Bacteria; p__Firmicutes; c__Clostridia; o__Lachnospirales; f__Lachnospiraceae; g__[Eubacterium] ruminantium group; s__uncultured rumen bacterium	0	29	0	26	27	53	0	40	39	0	0	40	36	25	33	0	0	0	0	0	24	0	0	0
ASV281	d__Bacteria; p__Firmicutes; c__Clostridia; o__Oscillospirales; f__Hungateiclostridiaceae; g__Saccharofermentans; s__uncultured bacterium	0	0	0	0	0	44	0	0	51	0	30	0	24	0	78	19	0	17	39	0	52	0	19	15
ASV282	d__Bacteria; p__Firmicutes; c__Clostridia; o__Oscillospirales; f__Oscillospiraceae; g__NK4A214 group; s__uncultured bacterium	0	0	73	0	0	0	0	0	0	0	0	43	162	0	112	0	0	42	0	0	0	0	0	0
ASV283	d__Bacteria; p__Bacteroidota; c__Bacteroidia; o__Bacteroidales; f__Muribaculaceae; g__norank; s__uncultured rumen bacterium	30	56	0	0	0	0	45	7	0	0	0	82	0	0	0	0	34	0	0	127	0	0	39	0
ASV284	d__Bacteria; p__Firmicutes; c__Clostridia; o__Oscillospirales; f__Ruminococcaceae; g__Ruminococcus; s__Ruminococcus flavefaciens	0	0	0	0	0	108	0	0	161	0	37	0	32	0	0	0	0	0	0	0	0	59	0	0
ASV285	d__Bacteria; p__Bacteroidota; c__Bacteroidia; o__Bacteroidales; f__Prevotellaceae; g__Prevotella; s__uncultured bacterium	59	0	7	27	12	36	0	80	28	21	0	0	0	28	0	0	26	0	0	0	11	0	0	9
ASV286	d__Bacteria; p__Firmicutes; c__Clostridia; o__Oscillospirales; f__Oscillospiraceae; g__Papillibacter; s__uncultured bacterium	36	15	57	12	0	0	0	0	0	0	28	21	37	0	22	24	0	28	18	37	10	0	28	19
ASV287	d__Bacteria; p__Bacteroidota; c__Bacteroidia; o__Bacteroidales; f__Prevotellaceae; g__Prevotellaceae UCG-001; s__uncultured rumen bacterium	0	0	0	0	138	104	0	0	0	90	0	0	0	0	0	0	0	0	0	0	0	0	0	0
ASV288	d__Bacteria; p__Firmicutes; c__Clostridia; o__Oscillospirales; f__Oscillospiraceae; g__NK4A214 group; s__uncultured rumen bacterium	0	0	26	0	0	0	0	0	0	0	0	0	27	0	216	32	0	17	38	0	23	8	57	16
ASV289	d__Bacteria; p__Bacteroidota; c__Bacteroidia; o__Bacteroidales; f__Muribaculaceae; g__norank; s__uncultured bacterium	0	44	37	0	12	0	0	0	0	0	26	0	63	0	28	0	0	18	57	47	0	10	39	20
ASV290	d__Bacteria; p__Bacteroidota; c__Bacteroidia; o__Bacteroidales; f__Prevotellaceae; g__Prevotella; s__uncultured rumen bacterium	0	70	0	0	0	0	0	0	0	0	115	139	0	0	0	0	0	0	0	0	0	56	0	0
ASV291	d__Bacteria; p__Firmicutes; c__Clostridia; o__Oscillospirales; f__Oscillospiraceae; g__NK4A214 group; s__uncultured bacterium	23	24	43	0	0	0	14	0	0	0	15	10	0	15	79	16	18	32	17	52	0	0	22	38
ASV292	d__Bacteria; p__Bacteroidota; c__Bacteroidia; o__Bacteroidales; f__Rikenellaceae; g__Rikenellaceae RC9 gut group; s__uncultured bacterium	25	24	0	15	14	0	0	28	0	8	60	27	46	10	28	0	0	0	39	0	22	0	0	0
ASV293	d__Bacteria; p__Firmicutes; c__Negativicutes; o__Acidaminococcales; f__Acidaminococcaceae; g__Succiniclasticum; s__uncultured bacterium	0	0	0	0	0	56	0	0	39	34	0	0	0	98	0	0	117	0	0	0	0	0	0	0
ASV294	d__Bacteria; p__Bacteroidota; c__Bacteroidia; o__Bacteroidales; f__Muribaculaceae; g__norank; s__uncultured rumen bacterium	95	0	0	57	24	0	16	0	0	16	0	0	0	0	0	23	25	0	0	0	75	0	0	0
ASV295	d__Bacteria; p__Cyanobacteria; c__Vampirivibrionia; o__Gastranaerophilales; f__norank; g__norank; s__uncultured rumen bacterium	22	0	0	17	12	5	23	76	0	10	0	0	23	23	0	4	58	0	0	0	21	4	0	23
ASV296	d__Bacteria; p__Bacteroidota; c__Bacteroidia; o__Bacteroidales; f__Muribaculaceae; g__norank; s__uncultured rumen bacterium	12	0	27	0	41	0	0	29	0	0	31	20	31	11	0	32	0	0	44	28	29	0	25	0
ASV297	d__Bacteria; p__Bacteroidota; c__Bacteroidia; o__Bacteroidales; f__Prevotellaceae; g__Prevotella; s__uncultured bacterium	62	0	0	0	0	0	83	0	0	0	0	71	53	0	0	0	0	0	0	0	41	58	0	0
ASV298	d__Bacteria; p__Spirochaetota; c__Spirochaetia; o__Spirochaetales; f__Spirochaetaceae; g__Treponema	0	0	0	29	30	53	58	35	0	27	0	0	0	22	0	0	0	0	0	0	36	0	0	25
ASV299	d__Bacteria; p__Firmicutes; c__Clostridia; o__Christensenellales; f__Christensenellaceae; g__Christensenellaceae R-7 group; s__uncultured bacterium	15	18	20	4	8	4	0	9	0	0	18	10	23	5	34	18	0	30	16	54	11	28	35	27
ASV300	d__Bacteria; p__Firmicutes; c__Negativicutes; o__Veillonellales-Selenomonadales; f__Selenomonadaceae; g__Selenomonas	48	18	0	23	23	0	25	15	0	22	17	32	0	20	0	0	23	21	0	0	32	0	0	0
ASV301	d__Bacteria; p__Firmicutes; c__Clostridia; o__Clostridia UCG-014; f__norank; g__norank; s__uncultured bacterium	0	0	0	17	55	0	22	39	28	23	0	0	0	71	0	0	74	0	0	0	0	0	0	0
ASV302	d__Bacteria; p__Bacteroidota; c__Bacteroidia; o__Bacteroidales; f__Prevotellaceae; g__Prevotella; s__uncultured rumen bacterium	0	21	125	0	31	0	0	0	0	0	41	41	34	0	0	0	0	5	0	0	14	0	0	28
ASV303	d__Bacteria; p__Bacteroidota; c__Bacteroidia; o__Bacteroidales; f__Prevotellaceae; g__Prevotella; s__uncultured bacterium	0	50	0	0	10	0	0	0	0	0	36	18	0	0	0	34	0	51	18	57	10	23	65	14
ASV304	d__Bacteria; p__Firmicutes; c__Clostridia; o__Oscillospirales; f__Ruminococcaceae; g__Ruminococcus; s__uncultured bacterium	53	12	0	41	48	0	0	0	0	0	0	63	0	44	0	0	0	0	6	0	52	0	0	0
ASV305	d__Bacteria; p__Firmicutes; c__Clostridia; o__Oscillospirales; f__Oscillospiraceae; g__UCG-002; s__uncultured bacterium	0	60	0	0	0	0	0	0	0	0	0	76	0	0	90	0	0	0	0	81	0	49	53	0
ASV306	d__Bacteria; p__Bacteroidota; c__Bacteroidia; o__Bacteroidales; f__Muribaculaceae; g__norank; s__uncultured rumen bacterium	0	0	55	0	0	0	0	0	0	0	0	0	81	0	84	0	0	48	0	0	27	0	57	40
ASV307	d__Bacteria; p__Bacteroidota; c__Bacteroidia; o__Bacteroidales; f__Prevotellaceae; g__Prevotella; s__uncultured rumen bacterium	20	0	0	8	51	0	13	99	0	0	0	0	0	0	0	16	0	3	0	0	72	5	0	0
ASV308	d__Bacteria; p__Bacteroidota; c__Bacteroidia; o__Bacteroidales; f__Prevotellaceae; g__Prevotella; s__uncultured bacterium	0	0	63	23	9	0	25	12	0	0	45	48	0	17	9	48	0	28	0	0	10	0	23	0
ASV309	d__Bacteria; p__Firmicutes; c__Clostridia; o__Lachnospirales; f__Lachnospiraceae; g__Moryella; s__uncultured rumen bacterium	0	48	0	0	0	0	15	0	0	0	0	14	48	0	98	0	0	0	25	65	17	0	0	37
ASV310	d__Bacteria; p__Firmicutes; c__Clostridia; o__Oscillospirales; f__[Eubacterium] coprostanoligenes group; g__norank; s__uncultured rumen bacterium	0	9	49	4	9	0	0	0	0	0	48	38	21	0	50	0	0	22	35	27	0	34	0	30
ASV311	d__Bacteria; p__Spirochaetota; c__Spirochaetia; o__Spirochaetales; f__Spirochaetaceae; g__Treponema; s__uncultured rumen bacterium	20	0	0	28	23	22	22	102	20	9	0	0	0	10	0	14	9	0	0	0	9	3	0	7
ASV312	d__Bacteria; p__Firmicutes; c__Clostridia; o__Oscillospirales; f__Ruminococcaceae; g__Ruminococcus; s__uncultured bacterium	32	0	0	9	36	68	0	0	71	27	0	0	0	26	0	0	26	0	0	0	14	0	0	0
ASV313	d__Bacteria; p__Firmicutes; c__Clostridia; o__Lachnospirales; f__Lachnospiraceae; g__probable genus 10; s__uncultured bacterium	18	0	0	3	0	0	21	34	0	0	44	22	27	0	35	19	0	16	0	25	40	23	0	9
ASV314	d__Bacteria; p__Bacteroidota; c__Bacteroidia; o__Bacteroidales; f__Prevotellaceae; g__Prevotellaceae UCG-003; s__uncultured rumen bacterium	0	33	0	35	0	31	48	46	0	0	0	0	0	19	0	32	0	0	0	0	0	28	0	42
ASV315	d__Bacteria; p__Spirochaetota; c__Spirochaetia; o__Spirochaetales; f__Spirochaetaceae; g__Treponema; s__uncultured rumen bacterium	13	11	7	51	29	10	25	9	0	28	17	19	19	0	0	0	5	11	5	10	6	22	0	12
ASV316	d__Bacteria; p__Bacteroidota; c__Bacteroidia; o__Bacteroidales; f__Prevotellaceae; g__Prevotellaceae UCG-003; s__uncultured rumen bacterium	0	23	0	0	16	0	32	17	0	7	31	13	20	0	0	11	0	22	23	0	18	43	16	35
ASV317	d__Bacteria; p__Bacteroidota; c__Bacteroidia; o__Bacteroidales; f__F082; g__norank; s__uncultured rumen bacterium	0	0	0	43	52	25	44	0	36	28	0	0	0	20	0	0	0	0	0	0	39	0	0	0
ASV318	d__Bacteria; p__Firmicutes; c__Clostridia; o__Oscillospirales; f__Oscillospiraceae; g__NK4A214 group; s__uncultured bacterium	10	71	0	0	0	0	0	0	0	0	107	0	26	0	75	0	0	0	0	0	9	0	0	41
ASV319	d__Bacteria; p__Bacteroidota; c__Bacteroidia; o__Bacteroidales; f__Prevotellaceae; g__Prevotella_7; s__uncultured bacterium	28	0	0	63	0	71	0	0	85	0	0	0	0	32	0	0	0	0	0	0	0	0	0	0
ASV320	d__Bacteria; p__Firmicutes; c__Clostridia; o__Lachnospirales; f__Lachnospiraceae; g__Lachnobacterium; s__Lachnobacterium bovis	15	8	0	30	15	23	7	16	33	0	10	0	10	0	14	55	0	4	5	0	27	3	8	20
ASV321	d__Bacteria; p__Bacteroidota; c__Bacteroidia; o__Bacteroidales; f__Prevotellaceae; g__Prevotella; s__uncultured rumen bacterium	35	0	0	25	0	0	0	7	0	0	0	0	0	0	0	0	0	58	0	59	25	0	39	50
ASV322	d__Bacteria; p__Bacteroidota; c__Bacteroidia; o__Bacteroidales; f__Rikenellaceae; g__U29-B03; s__uncultured bacterium	32	0	0	4	9	0	0	31	20	3	0	10	0	9	6	53	0	13	28	0	17	35	20	14
ASV323	d__Bacteria; p__Firmicutes; c__Clostridia; o__Oscillospirales; f__Oscillospiraceae; g__NK4A214 group; s__uncultured bacterium	0	25	35	0	11	0	13	13	0	0	11	13	16	0	53	12	0	32	22	0	0	17	38	21
ASV324	d__Bacteria; p__Bacteroidota; c__Bacteroidia; o__Bacteroidales; f__Bacteroidales RF16 group; g__norank; s__uncultured rumen bacterium	0	0	59	0	12	0	0	0	0	0	0	0	69	0	0	28	0	0	29	0	0	28	79	29
ASV325	d__Bacteria; p__Bacteroidota; c__Bacteroidia; o__Bacteroidales; f__Prevotellaceae; g__Prevotellaceae UCG-003; s__uncultured rumen bacterium	0	42	0	44	41	0	0	0	0	0	0	0	0	0	0	0	0	0	0	64	0	30	54	21
ASV326	d__Bacteria; p__Bacteroidota; c__Bacteroidia; o__Bacteroidales; f__Prevotellaceae; g__Prevotella; s__uncultured rumen bacterium	20	0	0	33	0	0	0	25	0	0	0	0	0	0	0	71	0	61	34	0	20	0	28	0
ASV327	d__Bacteria; p__Firmicutes; c__Clostridia; o__Lachnospirales; f__Lachnospiraceae; g__Moryella; s__uncultured rumen bacterium	0	0	49	0	0	0	0	17	0	0	73	44	0	0	62	22	0	0	0	0	0	35	39	0
ASV328	d__Bacteria; p__Bacteroidota; c__Bacteroidia; o__Bacteroidales; f__Prevotellaceae; g__Prevotella	0	20	24	13	16	0	0	19	0	0	0	12	15	0	28	49	0	24	17	0	10	23	38	11
ASV329	d__Bacteria; p__Firmicutes; c__Clostridia; o__Oscillospirales; f__Oscillospiraceae; g__NK4A214 group; s__uncultured bacterium	0	21	0	0	0	0	0	12	0	0	0	21	30	0	46	22	0	39	26	0	22	11	45	17
ASV330	d__Bacteria; p__Firmicutes; c__Negativicutes; o__Veillonellales-Selenomonadales; f__Selenomonadaceae; g__uncultured; s__uncultured rumen bacterium	37	0	0	0	51	25	0	21	0	49	0	0	0	56	0	0	39	0	0	0	0	0	0	0
ASV331	d__Bacteria; p__Bacteroidota; c__Bacteroidia; o__Bacteroidales; f__Prevotellaceae; g__Prevotella; s__uncultured bacterium	7	0	0	46	11	0	37	115	0	0	0	0	0	0	0	26	0	0	0	0	18	23	0	0
ASV332	d__Bacteria; p__Firmicutes; c__Clostridia; o__Lachnospirales; f__Lachnospiraceae; g__Lachnospiraceae NK4A136 group	16	17	18	0	11	0	0	35	0	0	47	28	32	0	57	0	0	0	0	0	30	22	0	0
ASV333	d__Bacteria; p__Firmicutes; c__Clostridia; o__Peptostreptococcales-Tissierellales; f__Anaerovoracaceae; g__[Eubacterium] brachy group; s__uncultured bacterium	0	13	0	0	0	0	6	0	0	0	18	16	13	0	36	21	0	26	57	0	0	30	60	44
ASV334	d__Bacteria; p__Bacteroidota; c__Bacteroidia; o__Bacteroidales; f__Prevotellaceae; g__Prevotella; s__uncultured rumen bacterium	25	0	0	29	60	0	33	42	0	0	0	0	0	0	0	40	0	12	13	0	4	16	0	0
ASV335	d__Bacteria; p__Firmicutes; c__Clostridia; o__Christensenellales; f__Christensenellaceae; g__Christensenellaceae R-7 group; s__uncultured rumen bacterium	0	17	57	0	0	0	0	49	0	0	0	19	0	0	0	107	0	12	0	37	0	0	34	0
ASV336	d__Bacteria; p__Bacteroidota; c__Bacteroidia; o__Bacteroidales; f__Rikenellaceae; g__Rikenellaceae RC9 gut group	0	0	0	0	28	8	16	46	0	4	24	22	28	0	0	0	12	30	0	0	0	0	39	38
ASV337	d__Bacteria; p__Bacteroidota; c__Bacteroidia; o__Bacteroidales; f__Prevotellaceae; g__Prevotella; s__uncultured rumen bacterium	16	0	23	43	46	0	0	14	0	0	0	0	14	0	0	0	0	19	64	0	14	0	0	25
ASV338	d__Bacteria; p__Firmicutes; c__Bacilli; o__Erysipelotrichales; f__Erysipelatoclostridiaceae; g__UCG-004; s__uncultured rumen bacterium	0	3	3	33	10	12	25	35	15	1	0	0	12	5	15	8	7	13	16	12	38	13	0	0
ASV339	d__Bacteria; p__Bacteroidota; c__Bacteroidia; o__Bacteroidales; f__Prevotellaceae; g__Prevotella; s__Prevotella bryantii B14	0	0	0	39	67	57	95	0	0	49	0	0	0	0	0	0	0	0	0	0	0	0	0	0
ASV340	d__Bacteria; p__Bacteroidota; c__Bacteroidia; o__Bacteroidales; f__Prevotellaceae; g__Prevotellaceae UCG-001; s__uncultured rumen bacterium	0	66	102	0	0	0	0	0	0	0	0	0	21	0	4	0	0	9	10	58	0	0	24	32
ASV341	d__Bacteria; p__Firmicutes; c__Clostridia; o__Oscillospirales; f__Oscillospiraceae; g__UCG-002; s__uncultured bacterium	10	27	16	21	7	0	6	0	0	0	10	13	17	0	13	17	0	25	34	0	0	21	29	20
ASV342	d__Bacteria; p__Bacteroidota; c__Bacteroidia; o__Bacteroidales; f__F082; g__norank; s__uncultured rumen bacterium	0	0	36	0	0	0	0	0	0	0	38	52	0	0	49	0	0	26	13	0	0	22	51	34
ASV343	d__Bacteria; p__Bacteroidota; c__Bacteroidia; o__Bacteroidales; f__Rikenellaceae; g__Rikenellaceae RC9 gut group; s__uncultured bacterium	36	21	0	0	7	0	24	0	0	0	30	4	0	13	0	33	0	50	66	0	14	0	0	0
ASV344	d__Bacteria; p__Bacteroidota; c__Bacteroidia; o__Bacteroidales; f__Rikenellaceae; g__Rikenellaceae RC9 gut group; s__uncultured rumen bacterium	0	34	0	0	5	0	8	24	0	0	16	10	10	0	25	0	0	25	0	75	16	0	20	14
ASV345	d__Bacteria; p__Firmicutes; c__Clostridia; o__Oscillospirales; f__Oscillospiraceae; g__NK4A214 group; s__uncultured bacterium	26	55	0	0	0	0	0	0	0	0	26	20	47	0	41	40	0	0	0	0	0	0	43	36
ASV346	d__Bacteria; p__Firmicutes; c__Clostridia; o__Oscillospirales; f__Ruminococcaceae; g__uncultured; s__uncultured rumen bacterium	0	32	144	0	0	0	0	0	0	0	0	0	0	0	54	0	0	0	0	39	0	0	0	51
ASV347	d__Bacteria; p__Bacteroidota; c__Bacteroidia; o__Bacteroidales; f__Prevotellaceae; g__Prevotella; s__uncultured rumen bacterium	0	0	0	21	45	0	15	0	0	0	54	59	0	0	0	0	0	71	0	0	0	13	0	0
ASV348	d__Bacteria; p__Bacteroidota; c__Bacteroidia; o__Bacteroidales; f__Prevotellaceae; g__Prevotellaceae Ga6A1 group	0	0	0	64	43	24	50	0	30	21	0	0	0	0	0	0	15	0	38	0	0	0	0	0
ASV349	d__Bacteria; p__Bacteroidota; c__Bacteroidia; o__Bacteroidales; f__Prevotellaceae; g__Prevotellaceae UCG-004; s__uncultured bacterium	0	0	0	0	46	0	0	36	0	0	0	0	0	0	0	0	0	0	0	0	0	76	0	100
ASV350	d__Bacteria; p__Bacteroidota; c__Bacteroidia; o__Bacteroidales; f__Prevotellaceae; g__Prevotellaceae UCG-001; s__uncultured bacterium	0	0	0	66	0	0	0	0	0	51	0	0	0	43	0	0	93	0	0	0	0	0	0	0
ASV351	d__Bacteria; p__Bacteroidota; c__Bacteroidia; o__Bacteroidales; f__Prevotellaceae; g__Prevotellaceae UCG-003; s__uncultured bacterium	23	19	23	23	0	0	25	0	0	0	29	40	19	0	12	0	0	18	0	0	0	28	35	13
ASV352	d__Bacteria; p__Firmicutes; c__Clostridia; o__Clostridia UCG-014; f__norank; g__norank; s__uncultured bacterium	0	0	32	0	14	0	0	0	0	0	36	6	50	0	15	0	0	51	54	17	22	0	0	7
ASV353	d__Bacteria; p__Firmicutes; c__Negativicutes; o__Acidaminococcales; f__Acidaminococcaceae; g__Acidaminococcus	9	0	0	0	3	0	10	0	7	23	0	0	0	97	0	0	109	0	0	0	27	4	0	0
ASV354	d__Bacteria; p__Bacteroidota; c__Bacteroidia; o__Bacteroidales; f__Prevotellaceae; g__Prevotella; s__uncultured bacterium	128	0	0	51	0	46	0	0	0	28	0	0	0	0	0	0	0	0	0	0	0	0	0	0
ASV355	d__Bacteria; p__Firmicutes; c__Clostridia; o__Oscillospirales; f__Oscillospiraceae; g__NK4A214 group; s__uncultured bacterium	20	0	91	0	0	0	46	30	0	11	59	0	0	9	17	0	0	0	0	0	31	0	0	0
ASV356	d__Bacteria; p__Firmicutes; c__Clostridia; o__Oscillospirales; f__Oscillospiraceae; g__NK4A214 group; s__uncultured bacterium	0	0	0	0	0	0	0	84	0	0	0	0	0	0	59	0	0	131	0	0	0	0	0	0
ASV357	d__Bacteria; p__Firmicutes; c__Clostridia; o__Oscillospirales; f__[Eubacterium] coprostanoligenes group; g__norank; s__uncultured bacterium	22	18	29	7	0	0	20	5	0	0	25	10	24	0	23	12	0	21	19	0	13	0	24	12
ASV358	d__Bacteria; p__Firmicutes; c__Clostridia; o__Oscillospirales; f__Ruminococcaceae; g__Ruminococcus; s__uncultured bacterium	0	0	105	0	0	0	0	0	0	0	75	0	104	0	0	28	0	0	0	0	0	0	0	0
ASV359	d__Bacteria; p__Firmicutes; c__Clostridia; o__Clostridia UCG-014; f__norank; g__norank; s__uncultured Ruminococcaceae bacterium	0	0	0	0	0	0	26	0	0	0	88	0	98	0	0	0	0	27	0	0	0	12	0	35
ASV360	d__Bacteria; p__Bacteroidota; c__Bacteroidia; o__Bacteroidales; f__Prevotellaceae; g__Prevotella; s__uncultured bacterium	0	53	25	8	0	0	22	0	0	30	0	0	0	0	0	32	0	43	0	0	0	17	0	28
ASV361	d__Bacteria; p__Firmicutes; c__Clostridia; o__Lachnospirales; f__Lachnospiraceae; g__Lachnospiraceae NK3A20 group; s__uncultured rumen bacterium	38	11	0	8	5	8	23	0	11	0	0	11	24	0	26	11	0	0	20	10	23	24	10	16
ASV362	d__Bacteria; p__Firmicutes; c__Clostridia; o__Christensenellales; f__Christensenellaceae; g__Christensenellaceae R-7 group; s__uncultured rumen bacterium	0	0	0	0	0	0	0	0	0	0	0	0	167	0	0	0	0	0	0	0	0	100	0	0
ASV363	d__Bacteria; p__Bacteroidota; c__Bacteroidia; o__Bacteroidales; f__Prevotellaceae; g__Prevotellaceae YAB2003 group; s__uncultured rumen bacterium	0	0	0	0	42	112	0	0	0	0	0	0	0	105	0	0	0	0	0	0	0	0	0	0
ASV364	d__Bacteria; p__Firmicutes; c__Clostridia; o__Lachnospirales; f__Lachnospiraceae; g__[Eubacterium] ruminantium group; s__uncultured rumen bacterium	20	0	0	25	0	12	19	21	0	21	0	0	0	0	42	15	0	16	37	0	23	0	23	15
ASV365	d__Bacteria; p__Firmicutes; c__Clostridia; o__Oscillospirales; f__Hungateiclostridiaceae; g__Saccharofermentans; s__uncultured rumen bacterium	0	24	30	0	13	0	0	0	0	0	37	16	43	0	82	0	0	0	0	33	0	16	12	16
ASV366	d__Bacteria; p__Firmicutes; c__Clostridia; o__Lachnospirales; f__Lachnospiraceae; g__[Eubacterium] ruminantium group; s__uncultured rumen bacterium	0	31	17	0	0	0	0	0	0	0	49	38	43	0	0	0	0	46	0	50	0	0	0	12
ASV367	d__Bacteria; p__Spirochaetota; c__Spirochaetia; o__Spirochaetales; f__Spirochaetaceae; g__Treponema	0	42	0	9	0	0	0	57	0	32	40	0	0	0	0	0	0	40	0	0	0	25	0	0
ASV368	d__Bacteria; p__Bacteroidota; c__Bacteroidia; o__Bacteroidales; f__F082; g__norank; s__uncultured rumen bacterium	0	0	61	0	0	0	42	0	0	0	0	0	0	0	0	0	0	29	91	0	0	49	36	0
ASV369	d__Bacteria; p__Firmicutes; c__Clostridia; o__Lachnospirales; f__Lachnospiraceae; g__[Eubacterium] ventriosum group	0	18	2	0	0	5	0	47	9	0	14	24	2	0	45	24	0	0	7	0	0	22	63	28
ASV370	d__Bacteria; p__Bacteroidota; c__Bacteroidia; o__Bacteroidales; f__Prevotellaceae; g__Prevotella; s__uncultured bacterium	0	37	0	10	0	0	0	0	0	0	33	26	0	0	0	0	0	27	47	0	16	32	34	0
ASV371	d__Bacteria; p__Bacteroidota; c__Bacteroidia; o__Bacteroidales; f__Prevotellaceae; g__Prevotella_7	0	0	0	45	40	71	0	0	0	0	0	0	0	74	0	0	0	0	0	0	0	0	0	0
ASV372	d__Bacteria; p__Bacteroidota; c__Bacteroidia; o__Bacteroidales; f__Prevotellaceae; g__Prevotellaceae UCG-004; s__uncultured rumen bacterium	14	16	21	3	9	4	0	43	0	9	25	23	0	8	0	8	0	0	0	0	17	20	0	29
ASV373	d__Bacteria; p__Bacteroidota; c__Bacteroidia; o__Bacteroidales; f__uncultured; g__norank; s__uncultured rumen bacterium	31	0	0	17	0	0	40	10	0	0	35	25	21	0	0	15	0	0	0	0	0	32	50	0
ASV374	d__Bacteria; p__Firmicutes; c__Negativicutes; o__Veillonellales-Selenomonadales; f__Selenomonadaceae; g__Selenomonas; s__uncultured Veillonellaceae bacterium	22	0	0	45	11	15	30	33	27	39	0	0	0	17	0	0	20	0	6	0	0	0	0	0
ASV375	d__Bacteria; p__Firmicutes; c__Clostridia; o__Lachnospirales; f__Lachnospiraceae; g__[Eubacterium] xylanophilum group; s__uncultured rumen bacterium	28	0	18	21	7	16	0	40	12	0	9	11	11	26	0	0	34	0	0	0	29	0	0	5
ASV376	d__Bacteria; p__Firmicutes; c__Clostridia; o__Oscillospirales; f__Oscillospiraceae; g__NK4A214 group; s__uncultured rumen bacterium	10	24	35	0	11	0	0	0	0	0	16	21	13	0	34	8	0	19	0	18	12	13	30	21
ASV377	d__Bacteria; p__Bacteroidota; c__Bacteroidia; o__Bacteroidales; f__Prevotellaceae; g__Prevotella; s__uncultured bacterium	0	41	12	0	0	0	7	0	0	0	0	21	22	0	0	0	0	0	36	36	7	11	65	20
ASV378	d__Bacteria; p__Bacteroidota; c__Bacteroidia; o__Bacteroidales; f__Rikenellaceae; g__Rikenellaceae RC9 gut group; s__uncultured rumen bacterium	0	30	0	0	0	0	0	0	0	0	24	37	46	0	10	12	0	10	33	39	0	0	0	52
ASV379	d__Bacteria; p__Bacteroidota; c__Bacteroidia; o__Bacteroidales; f__F082; g__norank; s__uncultured rumen bacterium	0	0	14	0	0	0	0	0	0	0	28	17	38	0	85	0	0	18	33	41	0	0	31	8
ASV380	d__Bacteria; p__Bacteroidota; c__Bacteroidia; o__Bacteroidales; f__Prevotellaceae; g__Prevotella; s__uncultured rumen bacterium	0	0	0	13	39	0	133	14	6	22	0	0	0	3	0	0	0	13	0	0	0	35	0	0
ASV381	d__Bacteria; p__Bacteroidota; c__Bacteroidia; o__Bacteroidales; f__Prevotellaceae; g__Prevotella; s__uncultured rumen bacterium	0	58	73	0	0	0	0	0	0	0	0	35	0	0	0	0	0	19	0	105	0	0	0	0
ASV382	d__Bacteria; p__Firmicutes; c__Clostridia; o__Lachnospirales; f__Lachnospiraceae; g__Acetitomaculum; s__uncultured bacterium	8	19	24	3	7	0	0	0	0	0	0	0	0	0	33	0	0	46	34	21	4	20	39	31
ASV383	d__Bacteria; p__Bacteroidota; c__Bacteroidia; o__Bacteroidales; f__Prevotellaceae; g__Prevotellaceae UCG-003; s__uncultured rumen bacterium	0	83	22	0	0	6	8	15	7	0	0	0	0	0	0	0	0	11	0	0	0	36	36	28
ASV384	d__Bacteria; p__Bacteroidota; c__Bacteroidia; o__Bacteroidales; f__Prevotellaceae; g__Prevotellaceae UCG-003; s__uncultured rumen bacterium	0	0	0	0	0	0	0	0	0	0	0	0	0	0	0	0	0	0	0	365	0	0	0	0
ASV385	d__Bacteria; p__Firmicutes; c__Clostridia; o__Lachnospirales; f__Lachnospiraceae; g__probable genus 10; s__uncultured rumen bacterium	20	0	29	0	0	0	0	0	0	0	0	0	28	0	68	10	0	0	29	84	33	0	0	0
ASV386	d__Bacteria; p__Firmicutes; c__Clostridia; o__Lachnospirales; f__Lachnospiraceae; g__Lachnospiraceae AC2044 group; s__uncultured rumen bacterium	23	7	17	8	6	0	0	0	0	0	29	6	31	20	23	0	38	0	5	0	19	9	0	0
ASV387	d__Bacteria; p__Firmicutes; c__Clostridia; o__Oscillospirales; f__Ruminococcaceae; g__Ruminococcus; s__uncultured rumen bacterium	37	0	0	22	0	0	0	0	0	0	0	0	0	60	0	0	73	0	7	0	18	0	0	0
ASV388	d__Bacteria; p__Firmicutes; c__Clostridia; o__Lachnospirales; f__Lachnospiraceae; g__[Eubacterium] ventriosum group; s__uncultured bacterium	22	0	0	9	20	10	14	33	8	4	0	0	10	18	0	0	0	0	0	0	32	26	0	0
ASV389	d__Bacteria; p__Firmicutes; c__Clostridia; o__Oscillospirales; f__Oscillospiraceae; g__UCG-002; s__uncultured bacterium	0	0	0	0	0	0	13	0	0	0	20	0	94	0	38	25	0	0	63	0	0	28	0	0
ASV390	d__Bacteria; p__Firmicutes; c__Clostridia; o__Oscillospirales; f__Oscillospiraceae; g__UCG-002; s__uncultured bacterium	0	0	0	0	26	0	0	0	0	0	49	0	0	0	0	0	0	52	0	0	45	0	0	45
ASV391	d__Bacteria; p__Firmicutes; c__Clostridia; o__Lachnospirales; f__Lachnospiraceae; g__Syntrophococcus; s__uncultured bacterium	41	0	0	35	35	57	0	3	62	0	0	0	0	4	0	0	15	0	0	0	0	0	0	0
ASV392	d__Bacteria; p__Bacteroidota; c__Bacteroidia; o__Bacteroidales; f__Prevotellaceae; g__Prevotella; s__uncultured bacterium	87	0	0	15	30	10	121	0	0	0	0	0	0	0	0	0	0	0	0	0	0	0	0	0
ASV393	d__Bacteria; p__Bacteroidota; c__Bacteroidia; o__Bacteroidales; f__Paludibacteraceae; g__uncultured; s__uncultured bacterium	9	0	0	12	8	25	0	0	19	14	0	0	0	12	0	0	11	0	0	0	96	0	0	0
ASV394	d__Bacteria; p__Bacteroidota; c__Bacteroidia; o__Bacteroidales; f__Prevotellaceae; g__Prevotella_7	32	0	0	43	38	48	0	0	0	29	0	0	0	35	0	0	0	0	0	0	0	0	0	0
ASV395	d__Bacteria; p__Bacteroidota; c__Bacteroidia; o__Bacteroidales; f__Prevotellaceae; g__Prevotellaceae UCG-001; s__uncultured rumen bacterium	0	30	32	0	0	0	0	0	0	0	0	21	0	0	0	0	0	9	11	70	15	25	18	34
ASV396	d__Bacteria; p__Bacteroidota; c__Bacteroidia; o__Bacteroidales; f__Rikenellaceae; g__Rikenellaceae RC9 gut group; s__uncultured rumen bacterium	19	15	37	0	0	9	0	0	0	12	0	0	15	0	0	17	0	17	23	0	20	5	36	26
ASV397	d__Bacteria; p__Bacteroidota; c__Bacteroidia; o__Bacteroidales; f__Prevotellaceae; g__Prevotellaceae UCG-001; s__uncultured rumen bacterium	0	24	38	17	0	0	12	0	0	0	0	16	23	0	0	10	0	4	0	0	5	29	31	26
ASV398	d__Bacteria; p__Firmicutes; c__Clostridia; o__Clostridia UCG-014; f__norank; g__norank; s__uncultured rumen bacterium	0	39	0	0	0	0	0	57	0	0	0	37	0	0	0	0	0	45	0	0	0	0	0	44
ASV399	d__Bacteria; p__Firmicutes; c__Clostridia; o__Oscillospirales; f__Ruminococcaceae; g__Ruminococcus	27	52	0	17	14	0	0	0	0	0	0	29	16	25	0	0	40	0	0	0	0	12	0	0
ASV400	d__Bacteria; p__Bacteroidota; c__Bacteroidia; o__Bacteroidales; f__Prevotellaceae; g__Prevotella; s__uncultured rumen bacterium	0	41	0	4	0	0	13	22	0	0	2	20	13	0	31	0	0	25	0	33	0	14	24	23
ASV401	d__Bacteria; p__Spirochaetota; c__Spirochaetia; o__Spirochaetales; f__Spirochaetaceae; g__Treponema; s__uncultured bacterium	0	0	15	19	30	14	0	27	0	0	45	27	39	0	0	10	0	0	0	0	0	22	0	0
ASV402	d__Bacteria; p__Bacteroidota; c__Bacteroidia; o__Bacteroidales; f__Prevotellaceae; g__Prevotellaceae NK3B31 group; s__uncultured bacterium	0	0	0	38	0	11	0	0	0	23	0	0	0	84	0	0	71	0	0	0	0	0	0	0
ASV403	d__Bacteria; p__Bacteroidota; c__Bacteroidia; o__Bacteroidales; f__Muribaculaceae; g__norank; s__uncultured rumen bacterium	11	0	0	0	3	0	0	0	0	0	42	0	53	0	33	10	0	4	10	0	50	12	0	0
ASV404	d__Bacteria; p__Bacteroidota; c__Bacteroidia; o__Bacteroidales; f__Rikenellaceae; g__Rikenellaceae RC9 gut group; s__uncultured bacterium	5	29	0	6	6	0	0	0	0	0	0	0	18	0	0	27	0	13	15	69	19	12	12	8
ASV405	d__Bacteria; p__Firmicutes; c__Clostridia; o__Oscillospirales; f__UCG-010; g__norank; s__uncultured bacterium	0	27	0	0	0	0	0	0	0	0	0	0	0	0	51	0	0	38	24	73	0	0	25	39
ASV406	d__Bacteria; p__Actinobacteriota; c__Coriobacteriia; o__Coriobacteriales; f__Atopobiaceae; g__Olsenella; s__Olsenella umbonata	0	0	0	10	4	24	0	19	35	0	0	0	0	0	0	61	0	58	0	0	5	7	0	0
ASV407	d__Bacteria; p__Bacteroidota; c__Bacteroidia; o__Bacteroidales; f__Prevotellaceae; g__Prevotellaceae UCG-001; s__uncultured bacterium	0	0	0	0	0	0	0	0	0	0	56	72	0	0	43	0	0	0	0	0	6	76	0	0
ASV408	d__Bacteria; p__Bacteroidota; c__Bacteroidia; o__Bacteroidales; f__Prevotellaceae; g__Prevotella; s__uncultured rumen bacterium	0	14	73	6	0	0	0	0	0	0	0	59	29	0	0	23	0	33	19	0	0	0	0	0
ASV409	d__Bacteria; p__Bacteroidota; c__Bacteroidia; o__Bacteroidales; f__Prevotellaceae; g__Prevotellaceae UCG-003; s__uncultured rumen bacterium	0	0	0	0	0	0	0	0	0	0	0	0	0	0	0	0	0	0	0	333	0	0	0	0
ASV410	d__Bacteria; p__Firmicutes; c__Clostridia; o__Christensenellales; f__Christensenellaceae; g__Christensenellaceae R-7 group; s__uncultured rumen bacterium	0	21	0	0	0	0	15	0	0	0	45	4	49	0	45	0	0	37	0	0	0	0	0	46
ASV411	d__Bacteria; p__Bacteroidota; c__Bacteroidia; o__Bacteroidales; f__Prevotellaceae; g__Prevotella; s__uncultured rumen bacterium	0	36	8	0	0	0	0	0	0	0	32	38	15	0	26	0	0	8	0	46	0	14	16	16
ASV412	d__Bacteria; p__Firmicutes; c__Clostridia; o__Christensenellales; f__Christensenellaceae; g__Christensenellaceae R-7 group; s__uncultured bacterium	0	108	0	0	0	0	0	27	0	0	0	0	0	0	0	0	0	84	0	0	0	0	0	0
ASV413	d__Bacteria; p__Desulfobacterota; c__Desulfovibrionia; o__Desulfovibrionales; f__Desulfovibrionaceae; g__Desulfovibrio	0	0	34	0	4	0	0	0	0	0	29	29	32	0	44	0	0	12	10	32	6	24	0	0
ASV414	d__Bacteria; p__Firmicutes; c__Clostridia; o__Lachnospirales; f__Defluviitaleaceae; g__Defluviitaleaceae UCG-011; s__uncultured bacterium	0	0	0	13	17	0	13	17	0	9	28	0	36	0	49	21	0	0	27	0	0	0	0	16
ASV415	d__Bacteria; p__Bacteroidota; c__Bacteroidia; o__Bacteroidales; f__Prevotellaceae; g__Prevotellaceae UCG-003; s__uncultured rumen bacterium	0	25	16	2	4	0	17	0	0	0	13	9	11	0	22	13	0	13	11	34	9	15	25	13
ASV416	d__Bacteria; p__Firmicutes; c__Clostridia; o__Clostridia UCG-014; f__norank; g__norank; s__uncultured rumen bacterium	25	11	7	14	3	0	0	7	0	0	16	0	34	0	24	10	0	4	29	0	8	10	0	21
ASV417	Unclassified	0	0	43	0	0	0	0	5	0	0	0	0	0	0	0	0	0	38	0	0	0	0	65	86
ASV418	d__Bacteria; p__Bacteroidota; c__Bacteroidia; o__Bacteroidales; f__F082; g__norank; s__uncultured rumen bacterium	0	12	0	8	0	0	16	21	0	0	32	34	22	2	31	0	0	17	0	0	6	0	0	18
ASV419	d__Bacteria; p__Bacteroidota; c__Bacteroidia; o__Bacteroidales; f__Prevotellaceae; g__Prevotellaceae UCG-001; s__uncultured rumen bacterium	0	0	71	0	0	0	0	0	0	0	61	35	36	0	0	0	0	0	0	0	41	0	0	0
ASV420	d__Bacteria; p__Bacteroidota; c__Bacteroidia; o__Bacteroidales; f__Prevotellaceae; g__Prevotella; s__uncultured bacterium	0	0	0	0	21	0	0	0	0	0	54	34	17	0	0	23	0	24	0	0	0	15	0	20
ASV421	d__Bacteria; p__Bacteroidota; c__Bacteroidia; o__Bacteroidales; f__Prevotellaceae; g__Prevotella; s__uncultured bacterium	115	0	0	0	0	0	0	0	0	40	0	0	0	0	0	0	64	0	0	0	0	0	0	0
ASV422	d__Bacteria; p__Bacteroidota; c__Bacteroidia; o__Bacteroidales; f__Prevotellaceae; g__Prevotella; s__uncultured rumen bacterium	0	18	29	3	0	0	6	0	0	0	22	24	13	0	3	30	0	16	7	16	0	21	0	17
ASV423	d__Bacteria; p__Bacteroidota; c__Bacteroidia; o__Bacteroidales; f__Prevotellaceae; g__Prevotella; s__uncultured rumen bacterium	0	0	0	0	0	0	0	62	31	37	0	0	0	37	0	0	45	0	0	0	0	0	0	0
ASV424	d__Bacteria; p__Cyanobacteria; c__Vampirivibrionia; o__Gastranaerophilales; f__norank; g__norank; s__uncultured rumen bacterium	20	0	0	0	0	23	0	59	25	93	0	0	0	0	0	0	0	0	0	0	0	0	0	0
ASV425	d__Bacteria; p__Bacteroidota; c__Bacteroidia; o__Bacteroidales; f__Prevotellaceae; g__Prevotella; s__uncultured rumen bacterium	36	0	19	29	0	0	0	0	0	0	44	0	27	0	0	13	0	0	0	0	24	0	0	35
ASV426	d__Bacteria; p__Spirochaetota; c__Spirochaetia; o__Spirochaetales; f__Spirochaetaceae; g__Treponema; s__Treponema succinifaciens DSM 2489	11	10	8	7	3	2	13	2	0	0	25	20	29	0	15	0	0	32	15	0	0	27	11	0
ASV427	d__Bacteria; p__Firmicutes; c__Clostridia; o__Lachnospirales; f__Lachnospiraceae; g__uncultured; s__uncultured bacterium	12	0	27	5	13	0	0	5	0	0	0	8	13	0	20	14	0	6	0	81	20	18	0	9
ASV428	d__Bacteria; p__Firmicutes; c__Negativicutes; o__Veillonellales-Selenomonadales; f__Selenomonadaceae	26	0	0	14	65	25	0	0	36	0	0	0	0	3	0	0	0	0	0	0	22	0	0	0
ASV429	d__Bacteria; p__Firmicutes; c__Negativicutes; o__Veillonellales-Selenomonadales; f__Selenomonadaceae; g__Veillonellaceae UCG-001; s__uncultured rumen bacterium	23	29	29	0	0	0	25	0	0	0	0	0	15	0	0	0	0	0	26	50	27	0	0	18
ASV430	d__Bacteria; p__Bacteroidota; c__Bacteroidia; o__Bacteroidales; f__Prevotellaceae; g__Prevotellaceae UCG-003	0	23	0	0	0	0	0	0	0	0	28	17	14	0	0	10	0	21	29	0	0	15	20	52
ASV431	d__Bacteria; p__Bacteroidota; c__Bacteroidia; o__Bacteroidales; f__Prevotellaceae; g__Prevotella; s__uncultured rumen bacterium	0	70	0	0	0	0	0	0	0	14	0	0	0	0	87	0	0	23	61	0	0	0	0	0
ASV432	d__Bacteria; p__Spirochaetota; c__Spirochaetia; o__Spirochaetales; f__Spirochaetaceae; g__Treponema; s__uncultured bacterium	11	0	0	17	9	12	16	26	0	11	7	9	13	7	0	23	0	11	8	0	12	7	0	11
ASV433	d__Bacteria; p__Bacteroidota; c__Bacteroidia; o__Bacteroidales; f__Prevotellaceae; g__Prevotella; s__uncultured rumen bacterium	0	0	0	51	18	0	15	26	0	0	0	0	0	8	0	23	0	0	0	0	0	50	0	0
ASV434	d__Bacteria; p__Bacteroidota; c__Bacteroidia; o__Bacteroidales; f__Prevotellaceae; g__Prevotella; s__uncultured bacterium	0	0	0	0	0	0	0	0	0	0	0	0	0	0	0	0	0	183	0	0	0	0	0	0
ASV435	d__Bacteria; p__Bacteroidota; c__Bacteroidia; o__Bacteroidales; f__Prevotellaceae; g__Prevotella	0	0	10	9	0	0	30	0	0	0	34	16	11	0	0	54	0	14	22	0	0	14	15	4
ASV436	d__Bacteria; p__Bacteroidota; c__Bacteroidia; o__Bacteroidales; f__Prevotellaceae; g__Prevotella; s__uncultured bacterium	0	0	0	37	64	0	71	0	0	0	0	0	0	0	0	0	0	0	0	0	0	0	37	0
ASV437	d__Bacteria; p__Bacteroidota; c__Bacteroidia; o__Bacteroidales; f__Prevotellaceae; g__Prevotellaceae YAB2003 group; s__uncultured rumen bacterium	0	0	0	0	46	0	36	0	29	29	29	16	0	0	0	0	0	0	0	0	28	0	0	0
ASV438	d__Bacteria; p__Bacteroidota; c__Bacteroidia; o__Bacteroidales; f__Prevotellaceae; g__Prevotella; s__uncultured rumen bacterium	9	35	0	0	0	0	0	0	0	0	0	24	0	0	0	0	0	0	60	34	0	0	0	67
ASV439	d__Bacteria; p__Firmicutes; c__Clostridia; o__Peptostreptococcales-Tissierellales; f__Anaerovoracaceae; g__Family XIII AD3011 group	58	20	18	0	5	8	13	7	0	0	0	0	10	0	0	7	15	0	0	0	12	15	16	13
ASV440	d__Bacteria; p__Firmicutes; c__Clostridia; o__Oscillospirales; f__Oscillospiraceae; g__V9D2013 group; s__uncultured rumen bacterium	0	0	23	0	0	0	0	0	0	0	14	6	24	0	28	54	0	16	31	0	0	14	34	10
ASV441	d__Bacteria; p__Bacteroidota; c__Bacteroidia; o__Bacteroidales; f__Prevotellaceae; g__Prevotella; s__uncultured rumen bacterium	0	0	0	0	0	0	0	0	0	0	0	99	0	0	0	0	0	0	0	51	0	67	0	0
ASV442	d__Bacteria; p__Firmicutes; c__Clostridia; o__Lachnospirales; f__Lachnospiraceae; g__[Eubacterium] ruminantium group; s__uncultured rumen bacterium	32	0	8	27	23	0	0	9	0	0	0	0	0	11	0	0	42	0	0	0	12	10	0	0
ASV443	d__Bacteria; p__Firmicutes; c__Clostridia; o__Lachnospirales; f__Lachnospiraceae; g__Agathobacter	31	0	0	0	0	0	0	93	0	0	0	0	0	30	0	0	36	0	0	0	0	0	0	0
ASV444	d__Bacteria; p__Firmicutes; c__Clostridia; o__Lachnospirales; f__Lachnospiraceae; g__Lachnospiraceae NK3A20 group; s__uncultured bacterium	0	0	0	15	52	26	0	0	16	0	0	0	0	41	0	0	22	0	0	0	3	0	0	0
ASV445	d__Bacteria; p__Firmicutes; c__Clostridia; o__Oscillospirales; f__Oscillospiraceae; g__NK4A214 group; s__uncultured bacterium	0	0	0	0	0	0	0	0	0	0	0	0	0	0	0	0	0	125	66	0	0	0	0	18
ASV446	d__Bacteria; p__Bacteroidota; c__Bacteroidia; o__Bacteroidales; f__Prevotellaceae; g__Prevotellaceae UCG-001; s__uncultured rumen bacterium	0	0	0	102	0	0	0	0	0	64	0	0	0	26	0	0	0	0	0	0	0	0	0	0
ASV447	d__Bacteria; p__Bacteroidota; c__Bacteroidia; o__Bacteroidales; f__Prevotellaceae; g__Prevotella; s__uncultured bacterium	0	0	0	0	0	0	0	0	0	0	80	140	0	0	0	0	0	0	0	0	0	0	0	0
ASV448	d__Bacteria; p__Firmicutes; c__Negativicutes; o__Veillonellales-Selenomonadales; f__Selenomonadaceae; g__Veillonellaceae UCG-001; s__uncultured rumen bacterium	20	0	24	16	16	0	0	0	0	6	0	22	19	0	19	31	0	0	0	22	22	0	0	0
ASV449	d__Bacteria; p__Bacteroidota; c__Bacteroidia; o__Bacteroidales; f__Prevotellaceae; g__Prevotella; s__uncultured bacterium	0	0	21	0	84	0	0	0	0	0	0	0	48	0	0	0	0	0	0	0	0	0	37	0
ASV450	d__Bacteria; p__Firmicutes; c__Clostridia; o__Christensenellales; f__Christensenellaceae; g__Christensenellaceae R-7 group; s__uncultured rumen bacterium	0	0	0	0	0	0	0	0	0	0	0	0	0	0	0	0	0	0	0	287	0	0	0	0
ASV451	d__Bacteria; p__Bacteroidota; c__Bacteroidia; o__Bacteroidales; f__Prevotellaceae; g__Prevotella; s__uncultured bacterium	0	0	23	0	0	0	16	12	0	0	0	0	0	0	0	18	0	22	0	16	48	24	39	0
ASV452	d__Bacteria; p__Bacteroidota; c__Bacteroidia; o__Bacteroidales; f__Prevotellaceae; g__Prevotella; s__uncultured rumen bacterium	0	11	0	6	0	0	0	0	0	0	0	56	39	0	0	0	0	0	0	0	0	22	0	48
ASV453	d__Bacteria; p__Firmicutes; c__Clostridia; o__Lachnospirales; f__Lachnospiraceae; g__[Eubacterium] ruminantium group	27	0	0	15	18	17	0	28	26	0	32	0	0	0	0	0	0	0	18	0	0	0	20	0
ASV454	d__Bacteria; p__Bacteroidota; c__Bacteroidia; o__Bacteroidales; f__Prevotellaceae; g__Prevotella; s__uncultured rumen bacterium	6	18	26	3	6	0	22	0	0	0	25	23	8	0	0	14	0	4	0	24	0	7	7	11
ASV455	d__Bacteria; p__Bacteroidota; c__Bacteroidia; o__Bacteroidales; f__Muribaculaceae; g__norank; s__uncultured rumen bacterium	0	0	0	0	0	0	0	50	35	0	0	0	0	0	0	0	0	0	0	0	86	0	0	0
ASV456	d__Bacteria; p__Bacteroidota; c__Bacteroidia; o__Bacteroidales; f__uncultured; g__norank; s__uncultured bacterium	77	0	0	19	0	40	0	38	25	0	0	0	0	15	0	0	0	0	0	0	0	0	0	0
ASV457	d__Bacteria; p__Firmicutes; c__Clostridia; o__Lachnospirales; f__Lachnospiraceae; g__Lachnospiraceae NC2004 group	52	0	0	3	9	0	10	6	0	0	0	0	0	42	0	0	38	0	0	0	16	0	0	0
ASV458	d__Bacteria; p__Bacteroidota; c__Bacteroidia; o__Bacteroidales; f__Prevotellaceae; g__Prevotella; s__uncultured rumen bacterium	0	0	23	0	5	0	13	0	0	0	20	25	20	0	14	0	0	25	11	19	15	18	0	0
ASV459	d__Bacteria; p__Bacteroidota; c__Bacteroidia; o__Bacteroidales; f__Prevotellaceae; g__Prevotella; s__uncultured bacterium	0	0	0	0	0	0	29	0	0	0	0	0	0	0	0	0	0	0	0	0	40	52	0	58
ASV460	d__Bacteria; p__Bacteroidota; c__Bacteroidia; o__Bacteroidales; f__Prevotellaceae; g__Prevotellaceae YAB2003 group; s__uncultured rumen bacterium	27	0	0	29	0	36	0	0	0	0	0	0	0	38	0	17	37	0	0	0	0	0	0	0
ASV461	d__Bacteria; p__Proteobacteria; c__Alphaproteobacteria; o__Acetobacterales; f__Acetobacteraceae; g__Acetobacter; s__Acetobacter pasteurianus	0	0	0	18	14	25	23	12	0	11	14	22	9	11	18	0	12	0	0	4	0	0	0	0
ASV462	d__Bacteria; p__Firmicutes; c__Clostridia; o__Lachnospirales; f__Lachnospiraceae; g__Roseburia; s__uncultured bacterium	0	0	0	0	44	0	0	79	0	0	0	0	0	37	0	0	0	0	0	0	0	0	0	0
ASV463	d__Bacteria; p__Firmicutes; c__Clostridia; o__Lachnospirales; f__Lachnospiraceae; g__uncultured; s__uncultured bacterium	0	0	12	10	0	11	0	20	0	0	31	0	24	0	0	0	0	3	10	32	15	13	11	0
ASV464	d__Bacteria; p__Cyanobacteria; c__Cyanobacteriia; o__Chloroplast; f__norank; g__norank; s__Medicago truncatula (barrel medic)	0	0	0	0	6	0	0	4	0	0	0	12	0	19	0	0	19	62	16	0	15	8	17	0
ASV465	d__Bacteria; p__Bacteroidota; c__Bacteroidia; o__Bacteroidales; f__F082; g__norank; s__uncultured rumen bacterium	0	16	22	0	0	0	0	0	0	0	34	10	59	0	15	0	0	0	27	0	1	15	0	0
ASV466	d__Bacteria; p__Bacteroidota; c__Bacteroidia; o__Bacteroidales; f__Prevotellaceae; g__Prevotellaceae YAB2003 group; s__uncultured rumen bacterium	0	0	0	41	0	0	65	60	0	0	0	0	0	0	0	0	0	0	0	0	0	0	0	0
ASV467	d__Bacteria; p__Firmicutes; c__Clostridia; o__Lachnospirales; f__Lachnospiraceae; g__Lachnospiraceae AC2044 group; s__uncultured bacterium	34	0	10	15	9	0	13	20	0	0	14	12	14	9	12	0	10	0	0	0	0	6	0	0
ASV468	d__Bacteria; p__Bacteroidota; c__Bacteroidia; o__Bacteroidales; f__Prevotellaceae; g__Prevotella; s__uncultured bacterium	0	0	0	0	0	0	0	79	0	0	0	0	0	0	0	0	0	0	0	0	33	55	0	0
ASV469	d__Bacteria; p__Bacteroidota; c__Bacteroidia; o__Bacteroidales; f__Prevotellaceae; g__Prevotella; s__uncultured rumen bacterium	47	125	0	0	0	0	0	0	0	0	0	0	0	0	0	0	0	0	0	0	0	0	0	0
ASV470	d__Bacteria; p__Fibrobacterota; c__Fibrobacteria; o__Fibrobacterales; f__Fibrobacteraceae; g__Fibrobacter; s__Fibrobacter succinogenes	0	0	0	89	0	66	0	0	0	0	0	0	0	0	0	0	0	0	0	0	0	0	0	0
ASV471	d__Bacteria; p__Bacteroidota; c__Bacteroidia; o__Bacteroidales; f__Prevotellaceae; g__Prevotella; s__uncultured rumen bacterium	28	0	0	15	14	0	4	0	0	0	0	0	11	0	0	11	0	40	14	15	10	25	0	3
ASV472	d__Bacteria; p__Firmicutes; c__Clostridia; o__Oscillospirales; f__[Eubacterium] coprostanoligenes group; g__norank; s__uncultured bacterium	0	25	0	6	0	0	11	0	0	0	0	0	0	0	0	0	0	3	37	28	0	52	0	23
ASV473	d__Bacteria; p__Firmicutes; c__Bacilli; o__Erysipelotrichales; f__Erysipelotrichaceae; g__Erysipelotrichaceae UCG-009; s__uncultured rumen bacterium	5	0	0	2	0	41	0	15	28	34	0	0	0	33	0	0	31	0	0	0	0	0	0	0
ASV474	d__Bacteria; p__Firmicutes; c__Bacilli; o__Erysipelotrichales; f__Erysipelotrichaceae; g__uncultured; s__uncultured rumen bacterium	0	0	11	6	0	0	0	13	0	0	14	13	36	3	37	0	4	9	0	0	11	19	14	15
ASV475	d__Bacteria; p__Bacteroidota; c__Bacteroidia; o__Bacteroidales; f__Prevotellaceae; g__Prevotella; s__uncultured rumen bacterium	0	0	0	0	24	24	47	0	0	0	0	0	0	17	0	0	0	0	0	0	0	19	0	48
ASV476	d__Bacteria; p__Firmicutes; c__Clostridia; o__Oscillospirales; f__Hungateiclostridiaceae; g__Saccharofermentans; s__uncultured bacterium	0	0	0	24	22	0	0	28	0	0	0	0	0	34	0	0	25	0	0	0	0	22	0	0
ASV477	d__Bacteria; p__Firmicutes; c__Clostridia; o__Lachnospirales; f__Lachnospiraceae; g__Agathobacter	0	13	0	0	27	0	0	0	0	0	22	10	26	0	41	14	0	0	0	0	17	16	11	0
ASV478	d__Bacteria; p__Firmicutes; c__Clostridia; o__Oscillospirales; f__Ruminococcaceae; g__Ruminococcus; s__uncultured rumen bacterium	0	21	35	0	0	0	0	0	0	0	29	49	0	0	0	0	0	21	2	0	0	22	0	0
ASV479	d__Bacteria; p__Bacteroidota; c__Bacteroidia; o__Bacteroidales; f__Prevotellaceae; g__Prevotellaceae NK3B31 group; s__uncultured bacterium	0	3	0	0	39	0	0	51	84	0	0	0	0	0	0	0	0	6	0	0	0	0	0	0
ASV480	d__Bacteria; p__Firmicutes; c__Clostridia; o__Oscillospirales; f__[Eubacterium] coprostanoligenes group; g__norank; s__uncultured bacterium	0	0	0	0	0	0	0	0	0	0	30	0	58	0	29	47	13	0	0	0	8	0	0	0
ASV481	d__Bacteria; p__Bacteroidota; c__Bacteroidia; o__Bacteroidales; f__Rikenellaceae; g__Rikenellaceae RC9 gut group; s__uncultured rumen bacterium	20	0	0	0	24	0	0	9	8	0	0	0	10	0	0	27	0	8	17	0	28	10	0	0
ASV482	d__Bacteria; p__Bacteroidota; c__Bacteroidia; o__Bacteroidales; f__Prevotellaceae; g__Prevotella; s__uncultured rumen bacterium	13	0	0	21	36	0	24	21	0	0	0	0	0	0	0	0	0	0	21	0	19	0	0	0
ASV483	d__Bacteria; p__Firmicutes; c__Negativicutes; o__Veillonellales-Selenomonadales; f__Selenomonadaceae; g__Veillonellaceae UCG-001; s__uncultured rumen bacterium	0	33	0	0	0	0	0	13	0	0	0	0	0	12	13	11	16	13	36	24	0	0	0	14
ASV484	d__Bacteria; p__Firmicutes; c__Clostridia; o__Lachnospirales; f__Lachnospiraceae; g__uncultured	0	0	21	0	27	10	0	24	9	12	0	15	15	0	0	0	0	0	0	0	22	0	14	0
ASV485	d__Bacteria; p__Bacteroidota; c__Bacteroidia; o__Bacteroidales; f__F082; g__norank; s__uncultured rumen bacterium	80	0	0	0	0	0	0	0	0	0	10	0	9	0	6	6	20	8	32	0	0	0	0	4
ASV486	d__Bacteria; p__Bacteroidota; c__Bacteroidia; o__Bacteroidales; f__Prevotellaceae; g__Prevotella; s__uncultured rumen bacterium	0	0	0	0	26	0	0	0	0	0	0	68	0	0	0	0	0	0	0	80	16	0	0	0
ASV487	d__Bacteria; p__Firmicutes; c__Clostridia; o__Clostridia UCG-014; f__norank; g__norank	54	0	0	27	32	0	0	0	0	0	0	0	0	0	0	9	0	0	0	0	17	22	0	0
ASV488	d__Bacteria; p__Firmicutes; c__Clostridia; o__Lachnospirales; f__Lachnospiraceae; g__Lachnospiraceae ND3007 group	0	0	0	0	0	0	0	0	0	0	47	0	0	0	48	27	0	46	0	0	0	0	35	0
ASV489	d__Bacteria; p__Firmicutes; c__Clostridia; o__Lachnospirales; f__Lachnospiraceae; g__Shuttleworthia; s__uncultured rumen bacterium	7	0	0	9	25	21	10	46	6	3	0	0	0	5	0	0	6	0	0	0	21	0	0	0
ASV490	d__Bacteria; p__Bacteroidota; c__Bacteroidia; o__Bacteroidales; f__Rikenellaceae; g__Rikenellaceae RC9 gut group; s__uncultured bacterium	0	0	74	0	0	0	0	0	0	0	0	10	22	0	0	0	0	30	13	0	0	0	58	4
ASV491	d__Bacteria; p__Bacteroidota; c__Bacteroidia; o__Bacteroidales; f__Prevotellaceae; g__Prevotellaceae UCG-003; s__uncultured rumen bacterium	0	0	40	0	0	0	0	0	0	0	0	0	33	0	20	27	0	0	0	0	0	0	0	64
ASV492	d__Bacteria; p__Firmicutes; c__Clostridia; o__Oscillospirales; f__Hungateiclostridiaceae; g__Saccharofermentans; s__uncultured bacterium	70	0	0	35	0	0	0	0	0	26	0	0	0	0	0	0	0	0	0	34	0	0	0	0
ASV493	d__Bacteria; p__Firmicutes; c__Clostridia; o__Lachnospirales; f__Lachnospiraceae; g__Lachnospiraceae AC2044 group; s__uncultured rumen bacterium	9	34	13	0	11	3	0	0	0	0	0	16	13	0	19	0	0	0	14	0	20	26	0	0
ASV494	d__Bacteria; p__Bacteroidota; c__Bacteroidia; o__Bacteroidales; f__Prevotellaceae; g__Prevotella; s__uncultured rumen bacterium	0	22	52	0	0	0	17	0	0	0	0	0	0	0	0	28	0	12	21	0	10	21	0	3
ASV495	d__Bacteria; p__Spirochaetota; c__Spirochaetia; o__Spirochaetales; f__Spirochaetaceae; g__Treponema; s__uncultured rumen bacterium	0	11	12	8	3	1	9	14	5	4	20	0	13	8	7	8	0	14	12	0	4	7	17	0
ASV496	d__Bacteria; p__Bacteroidota; c__Bacteroidia; o__Bacteroidales; f__Prevotellaceae; g__Prevotella; s__uncultured rumen bacterium	0	0	0	3	20	0	0	0	0	0	31	41	18	0	0	11	0	10	0	0	7	12	0	6
ASV497	d__Bacteria; p__Bacteroidota; c__Bacteroidia; o__Bacteroidales; f__Prevotellaceae; g__Prevotella; s__uncultured rumen bacterium	13	36	0	0	12	0	21	0	0	0	0	0	7	13	8	24	0	12	0	0	0	0	26	0
ASV498	d__Bacteria; p__Bacteroidota; c__Bacteroidia; o__Bacteroidales; f__Rikenellaceae; g__Rikenellaceae RC9 gut group; s__uncultured rumen bacterium	0	3	0	0	52	0	0	41	0	0	0	0	0	0	0	0	0	17	0	0	0	14	0	4
ASV499	d__Bacteria; p__Bacteroidota; c__Bacteroidia; o__Bacteroidales; f__Prevotellaceae; g__Prevotella; s__uncultured bacterium	0	0	74	0	0	0	0	0	0	0	0	82	0	0	0	0	16	0	0	0	0	0	0	0
ASV500	d__Bacteria; p__Bacteroidota; c__Bacteroidia; o__Bacteroidales; f__Prevotellaceae; g__Prevotellaceae UCG-001; s__uncultured rumen bacterium	0	35	23	0	0	0	14	0	0	0	3	70	0	0	0	0	0	16	0	0	0	0	23	0
ASV501	d__Bacteria; p__Bacteroidota; c__Bacteroidia; o__Bacteroidales; f__Prevotellaceae; g__Prevotella; s__uncultured bacterium	7	13	11	7	0	0	0	8	22	0	0	0	5	0	12	8	0	0	8	51	0	20	0	12
ASV502	d__Bacteria; p__Bacteroidota; c__Bacteroidia; o__Bacteroidales; f__Prevotellaceae; g__Prevotella; s__uncultured rumen bacterium	0	22	32	0	0	0	0	0	0	0	37	26	0	0	0	0	0	0	0	33	0	0	0	35
ASV503	d__Bacteria; p__Firmicutes; c__Clostridia; o__Oscillospirales; f__Ruminococcaceae; g__Ruminococcus; s__uncultured rumen bacterium	0	0	15	7	0	0	0	12	0	0	15	29	7	0	17	0	0	0	0	27	15	38	3	0
ASV504	d__Bacteria; p__Bacteroidota; c__Bacteroidia; o__Bacteroidales; f__Prevotellaceae; g__Prevotella; s__uncultured bacterium	27	0	0	22	0	0	27	17	0	0	0	0	0	0	0	0	0	24	0	0	26	22	0	0
ASV505	d__Bacteria; p__Bacteroidota; c__Bacteroidia; o__Bacteroidales; f__Prevotellaceae; g__Prevotella; s__uncultured rumen bacterium	0	0	0	0	41	18	67	0	0	21	0	17	0	0	0	0	0	0	0	0	0	0	0	0
ASV506	d__Bacteria; p__Bacteroidota; c__Bacteroidia; o__Bacteroidales; f__Rikenellaceae; g__Rikenellaceae RC9 gut group; s__uncultured rumen bacterium	0	9	31	4	7	0	0	15	0	0	0	10	11	0	7	0	0	7	17	0	0	22	16	13
ASV507	d__Bacteria; p__Bacteroidota; c__Bacteroidia; o__Bacteroidales; f__Prevotellaceae; g__Prevotellaceae UCG-001; s__uncultured rumen bacterium	0	26	38	0	0	0	0	0	0	0	0	32	0	0	0	0	0	17	0	0	25	0	34	0
ASV508	d__Bacteria; p__Firmicutes; c__Clostridia; o__Lachnospirales; f__Lachnospiraceae; g__Anaerosporobacter; s__uncultured bacterium	0	0	0	0	0	46	0	44	80	0	0	0	0	0	0	0	0	0	0	0	0	0	0	0
ASV509	d__Bacteria; p__Firmicutes; c__Clostridia; o__Oscillospirales; f__Hungateiclostridiaceae; g__Saccharofermentans; s__uncultured bacterium	0	0	0	0	0	0	52	0	0	0	0	22	26	0	0	0	0	35	0	0	0	0	54	0
ASV510	d__Bacteria; p__Firmicutes; c__Clostridia; o__Lachnospirales; f__Lachnospiraceae; g__Moryella	14	0	20	0	0	0	0	8	0	0	0	13	19	0	36	12	0	0	0	0	0	16	0	32
ASV511	d__Bacteria; p__Firmicutes; c__Clostridia; o__Lachnospirales; f__Lachnospiraceae; g__uncultured; s__uncultured Lachnospiraceae bacterium	0	0	0	0	0	0	0	0	0	0	54	107	0	0	0	0	0	0	0	0	0	0	0	0
ASV512	d__Bacteria; p__Bacteroidota; c__Bacteroidia; o__Bacteroidales; f__Prevotellaceae; g__Prevotella; s__uncultured bacterium	0	16	55	0	0	0	0	0	0	0	17	20	8	0	0	17	0	9	6	0	9	0	0	19
ASV513	d__Bacteria; p__Bacteroidota; c__Bacteroidia; o__Bacteroidales; f__Prevotellaceae; g__Prevotella; s__uncultured bacterium	0	28	0	0	0	0	39	0	0	0	0	0	26	0	0	0	0	0	0	0	0	57	25	0
ASV514	d__Bacteria; p__Bacteroidota; c__Bacteroidia; o__Bacteroidales; f__Muribaculaceae; g__norank; s__uncultured rumen bacterium	0	18	20	15	0	0	0	0	0	0	32	15	40	0	50	0	0	0	0	0	0	0	0	0
ASV515	d__Bacteria; p__Firmicutes; c__Clostridia; o__Oscillospirales; f__Oscillospiraceae; g__NK4A214 group; s__uncultured bacterium	0	0	0	0	0	0	0	0	0	0	0	0	0	0	76	63	0	23	45	0	0	0	0	0
ASV516	d__Bacteria; p__Firmicutes; c__Clostridia; o__Clostridia UCG-014; f__norank; g__norank; s__uncultured bacterium	0	0	0	0	12	0	0	0	47	12	0	0	0	0	0	0	81	0	0	0	0	0	0	0
ASV517	d__Bacteria; p__Firmicutes; c__Clostridia; o__Oscillospirales; f__Oscillospiraceae; g__NK4A214 group; s__uncultured rumen bacterium	0	0	0	0	0	68	0	0	118	0	0	0	0	0	0	0	0	0	0	0	0	0	0	0
ASV518	d__Bacteria; p__Spirochaetota; c__Spirochaetia; o__Spirochaetales; f__Spirochaetaceae; g__Treponema; s__uncultured bacterium	0	0	0	11	0	0	0	26	69	28	0	0	0	12	0	0	20	0	0	0	0	0	0	0
ASV519	d__Bacteria; p__Bacteroidota; c__Bacteroidia; o__Bacteroidales; f__Prevotellaceae; g__Prevotellaceae UCG-004	0	11	0	28	0	0	0	0	0	21	27	0	0	0	0	0	0	13	0	0	36	0	0	0
ASV520	d__Bacteria; p__Bacteroidota; c__Bacteroidia; o__Bacteroidales; f__Muribaculaceae; g__norank; s__uncultured rumen bacterium	0	0	0	0	65	0	0	0	0	0	0	0	0	0	0	0	0	0	74	0	0	0	0	0
ASV521	d__Bacteria; p__Bacteroidota; c__Bacteroidia; o__Bacteroidales; f__Prevotellaceae; g__Prevotella; s__uncultured bacterium	24	0	0	0	0	0	0	0	0	0	0	0	0	30	0	0	43	15	0	0	0	16	0	13
ASV522	d__Bacteria; p__Bacteroidota; c__Bacteroidia; o__Bacteroidales; f__Prevotellaceae; g__Prevotella; s__uncultured rumen bacterium	0	4	26	0	0	0	0	0	0	0	0	0	12	0	35	16	0	0	9	0	42	0	29	0
ASV523	d__Bacteria; p__Firmicutes; c__Clostridia; o__Lachnospirales; f__Lachnospiraceae; g__Lachnospiraceae NK3A20 group	0	0	0	11	15	0	11	26	0	15	0	21	13	0	0	0	0	4	24	0	14	0	0	0
ASV524	d__Bacteria; p__Fibrobacterota; c__Fibrobacteria; o__Fibrobacterales; f__Fibrobacteraceae; g__Fibrobacter	0	0	0	0	0	0	0	146	0	0	0	0	0	0	0	0	0	0	0	0	0	0	0	0
ASV525	d__Bacteria; p__Bacteroidota; c__Bacteroidia; o__Bacteroidales; f__Prevotellaceae; g__Prevotella; s__uncultured rumen bacterium	0	0	0	0	0	0	0	0	0	0	0	45	37	0	0	40	0	0	0	0	0	0	0	35
ASV526	d__Bacteria; p__Firmicutes; c__Clostridia; o__Lachnospirales; f__Defluviitaleaceae; g__Defluviitaleaceae UCG-011; s__uncultured bacterium	27	20	0	0	0	9	0	0	0	0	0	0	0	0	0	0	0	23	0	26	10	23	0	0
ASV527	d__Bacteria; p__Bacteroidota; c__Bacteroidia; o__Bacteroidales; f__Prevotellaceae; g__Prevotella; s__uncultured rumen bacterium	29	0	0	0	0	0	0	87	0	0	0	0	0	24	0	0	1	0	0	0	0	0	0	0
ASV528	d__Bacteria; p__Desulfobacterota; c__Desulfuromonadia; o__Bradymonadales; f__norank; g__norank; s__uncultured bacterium	22	0	0	0	0	0	0	0	0	0	43	25	59	0	0	0	0	13	0	0	5	0	12	0
ASV529	d__Bacteria; p__Patescibacteria; c__Saccharimonadia; o__Saccharimonadales; f__Saccharimonadaceae; g__Candidatus Saccharimonas; s__uncultured rumen bacterium	27	0	0	0	9	0	0	13	0	0	0	0	0	0	0	0	0	13	26	0	25	0	32	0
ASV530	d__Bacteria; p__Bacteroidota; c__Bacteroidia; o__Bacteroidales; f__Rikenellaceae; g__Rikenellaceae RC9 gut group; s__uncultured rumen bacterium	14	0	21	8	0	0	9	10	0	0	0	0	14	0	22	0	0	9	17	42	0	0	14	0
ASV531	d__Bacteria; p__Firmicutes; c__Clostridia; o__Oscillospirales; f__Ruminococcaceae; g__UCG-001; s__uncultured bacterium	0	0	0	10	0	0	27	0	0	0	0	0	0	0	0	20	0	0	46	0	0	34	0	15
ASV532	d__Bacteria; p__Firmicutes; c__Clostridia; o__Oscillospirales; f__Oscillospiraceae; g__NK4A214 group; s__uncultured rumen bacterium	12	14	28	0	0	0	0	9	0	0	0	10	14	0	40	13	0	11	0	0	0	0	0	11
ASV533	d__Bacteria; p__Firmicutes; c__Clostridia; o__Clostridia UCG-014; f__norank; g__norank; s__uncultured bacterium	10	0	0	0	0	0	0	0	4	0	0	0	23	0	0	49	0	0	0	0	24	25	0	10
ASV534	d__Bacteria; p__Bacteroidota; c__Bacteroidia; o__Bacteroidales; f__Prevotellaceae; g__Prevotella	0	0	0	42	39	0	0	0	0	0	0	0	0	0	0	0	0	57	0	0	0	0	0	0
ASV535	d__Bacteria; p__Proteobacteria; c__Gammaproteobacteria; o__Enterobacterales; f__Succinivibrionaceae; g__Succinivibrio; s__uncultured bacterium	20	0	0	0	50	17	0	0	18	0	0	0	0	9	0	0	0	0	0	0	10	4	0	0
ASV536	d__Bacteria; p__Bacteroidota; c__Bacteroidia; o__Bacteroidales; f__Muribaculaceae; g__norank; s__uncultured rumen bacterium	30	0	0	39	0	0	0	0	0	0	37	0	0	0	0	0	0	0	0	0	0	26	0	0
ASV537	d__Bacteria; p__Bacteroidota; c__Bacteroidia; o__Bacteroidales; f__Prevotellaceae; g__Prevotella; s__uncultured rumen bacterium	0	0	0	0	17	0	27	52	0	24	0	10	0	0	0	0	0	0	0	0	14	0	0	0
ASV538	d__Bacteria; p__Firmicutes; c__Clostridia; o__Oscillospirales; f__Ruminococcaceae; g__Ruminococcus; s__uncultured bacterium	0	0	0	0	0	0	0	0	0	0	0	0	0	0	0	39	0	77	0	0	0	0	63	0
ASV539	d__Bacteria; p__Firmicutes; c__Clostridia; o__Oscillospirales; f__UCG-010; g__norank; s__uncultured rumen bacterium	18	0	0	0	0	0	6	0	0	0	0	0	26	4	49	15	0	0	19	0	9	11	19	0
ASV540	d__Bacteria; p__Bacteroidota; c__Bacteroidia; o__Bacteroidales; f__Muribaculaceae; g__norank; s__uncultured bacterium	18	0	0	16	17	0	0	9	0	0	0	0	0	12	0	0	0	0	0	0	50	0	0	0
ASV541	d__Bacteria; p__Firmicutes; c__Clostridia; o__Lachnospirales; f__Lachnospiraceae; g__Butyrivibrio; s__Butyrivibrio proteoclasticus B316	0	29	0	0	0	0	0	0	0	0	0	0	0	0	102	0	0	0	0	0	0	0	0	42
ASV542	d__Bacteria; p__Spirochaetota; c__Spirochaetia; o__Spirochaetales; f__Spirochaetaceae; g__Treponema; s__uncultured bacterium	0	0	0	31	15	0	20	13	0	0	0	0	7	0	0	41	0	17	0	0	0	0	0	0
ASV543	d__Bacteria; p__Bacteroidota; c__Bacteroidia; o__Bacteroidales; f__Muribaculaceae; g__norank; s__uncultured rumen bacterium	0	0	24	0	0	0	0	0	0	0	0	0	10	23	15	0	0	0	7	0	48	19	0	0
ASV544	d__Bacteria; p__Firmicutes; c__Clostridia; o__Oscillospirales; f__Ruminococcaceae; g__CAG-352; s__uncultured rumen bacterium	0	0	0	0	0	0	25	125	0	0	0	0	0	0	0	0	0	0	0	0	0	0	0	0
ASV545	d__Bacteria; p__Firmicutes; c__Clostridia; o__Oscillospirales; f__Ruminococcaceae; g__uncultured; s__uncultured rumen bacterium	0	0	0	0	0	0	0	0	0	0	61	65	0	0	0	0	0	0	0	0	0	0	0	28
ASV546	d__Bacteria; p__Firmicutes; c__Clostridia; o__Clostridia UCG-014; f__norank; g__norank; s__uncultured bacterium	57	11	0	0	30	40	0	0	0	0	0	0	0	0	11	0	0	0	0	0	0	0	0	0
ASV547	d__Bacteria; p__Firmicutes; c__Clostridia; o__Peptostreptococcales-Tissierellales; f__Anaerovoracaceae; g__Anaerovorax; s__uncultured bacterium	13	8	0	4	10	0	0	11	0	0	23	15	13	0	15	11	0	6	0	0	0	10	0	12
ASV548	d__Bacteria; p__Bacteroidota; c__Bacteroidia; o__Bacteroidales; f__Prevotellaceae; g__Prevotella; s__uncultured rumen bacterium	8	0	26	0	0	0	31	0	0	0	0	9	2	0	0	0	0	10	13	0	15	0	12	29
ASV549	d__Bacteria; p__Spirochaetota; c__Spirochaetia; o__Spirochaetales; f__Spirochaetaceae; g__Treponema; s__uncultured bacterium	0	0	32	14	0	0	0	22	0	0	0	0	41	0	0	0	22	0	0	0	0	0	0	0
ASV550	d__Bacteria; p__Firmicutes; c__Negativicutes; o__Acidaminococcales; f__Acidaminococcaceae; g__Succiniclasticum; s__uncultured rumen bacterium	0	0	0	0	0	0	0	0	0	0	0	0	0	0	0	0	0	37	0	0	52	25	0	0
ASV551	d__Bacteria; p__Bacteroidota; c__Bacteroidia; o__Bacteroidales; f__uncultured; g__norank; s__uncultured rumen bacterium	18	0	0	17	23	0	0	0	0	0	0	0	10	11	0	0	8	0	0	44	13	0	0	0
ASV552	d__Bacteria; p__Bacteroidota; c__Bacteroidia; o__Bacteroidales; f__Prevotellaceae; g__Prevotella; s__uncultured rumen bacterium	0	21	42	0	0	0	0	0	0	0	22	32	6	0	0	0	0	0	0	0	12	6	0	5
ASV553	d__Bacteria; p__Firmicutes; c__Clostridia; o__Christensenellales; f__Christensenellaceae; g__Christensenellaceae R-7 group; s__uncultured rumen bacterium	10	5	75	0	16	0	0	0	0	0	0	0	11	0	10	0	0	9	0	0	3	9	10	0
ASV554	d__Bacteria; p__Bacteroidota; c__Bacteroidia; o__Bacteroidales; f__Prevotellaceae; g__Prevotella; s__uncultured bacterium	0	0	0	0	0	0	57	0	0	0	0	0	0	0	41	55	0	10	0	0	0	19	0	0
ASV555	d__Bacteria; p__Firmicutes; c__Clostridia; o__Lachnospirales; f__Lachnospiraceae; g__Lachnospiraceae AC2044 group; s__uncultured bacterium	16	0	0	5	2	0	0	9	0	0	20	0	13	0	48	0	0	0	8	11	8	10	2	0
ASV556	d__Bacteria; p__Firmicutes; c__Clostridia; o__Lachnospirales; f__Lachnospiraceae; g__Lachnospiraceae ND3007 group; s__uncultured bacterium	0	17	13	6	0	0	0	0	0	0	8	10	10	0	13	8	0	0	10	21	8	27	0	4
ASV557	d__Bacteria; p__Bacteroidota; c__Bacteroidia; o__Bacteroidales; f__Prevotellaceae; g__Prevotella; s__uncultured rumen bacterium	0	11	19	0	0	0	0	0	0	0	24	23	19	0	0	13	0	18	0	0	11	10	0	0
ASV558	d__Bacteria; p__Bacteroidota; c__Bacteroidia; o__Bacteroidales; f__Prevotellaceae; g__Prevotella; s__uncultured bacterium	0	0	0	0	21	0	0	0	0	0	0	0	0	0	0	0	0	61	0	0	0	32	29	0
ASV559	d__Bacteria; p__Firmicutes; c__Clostridia; o__Lachnospirales; f__Lachnospiraceae; g__uncultured; s__uncultured bacterium	40	0	0	6	0	21	0	19	30	15	0	0	0	0	0	0	0	0	0	0	0	0	0	0
ASV560	d__Bacteria; p__Bacteroidota; c__Bacteroidia; o__Bacteroidales; f__Muribaculaceae; g__norank; s__uncultured rumen bacterium	0	0	0	0	0	0	0	0	0	0	0	0	55	0	22	26	0	0	0	0	37	0	0	0
ASV561	d__Bacteria; p__Firmicutes; c__Clostridia; o__Oscillospirales; f__[Eubacterium] coprostanoligenes group; g__norank; s__uncultured bacterium	33	18	0	0	0	0	0	0	13	4	0	0	0	0	0	17	0	9	0	55	9	0	0	0
ASV562	d__Bacteria; p__Bacteroidota; c__Bacteroidia; o__Bacteroidales; f__Prevotellaceae; g__Prevotella; s__uncultured bacterium	0	0	0	15	0	3	36	9	14	6	0	4	7	2	0	0	0	7	7	0	13	9	0	15
ASV563	d__Bacteria; p__Bacteroidota; c__Bacteroidia; o__Bacteroidales; f__Prevotellaceae; g__Prevotella; s__uncultured rumen bacterium	0	0	0	0	0	0	0	0	0	0	32	0	0	0	0	68	0	0	0	48	0	0	0	11
ASV564	d__Bacteria; p__Firmicutes; c__Clostridia; o__Oscillospirales; f__UCG-010; g__norank; s__uncultured bacterium	9	0	21	0	11	0	0	0	0	0	16	22	34	0	0	18	0	0	0	0	16	0	0	0
ASV565	d__Bacteria; p__Firmicutes; c__Clostridia; o__Lachnospirales; f__Lachnospiraceae; g__Lachnospiraceae NK4A136 group; s__uncultured bacterium	13	0	0	12	0	0	0	13	0	0	12	18	0	0	28	0	0	0	20	0	3	8	21	7
ASV566	d__Bacteria; p__Firmicutes; c__Bacilli; o__Erysipelotrichales; f__Erysipelatoclostridiaceae; g__UCG-004; s__uncultured bacterium	0	0	5	32	10	9	0	0	0	2	11	0	8	0	0	18	11	7	0	0	20	0	0	0
ASV567	d__Bacteria; p__Firmicutes; c__Clostridia; o__Oscillospirales; f__Hungateiclostridiaceae; g__Saccharofermentans; s__uncultured rumen bacterium	0	0	0	14	0	0	0	30	0	0	18	22	0	0	0	0	0	10	14	18	17	0	0	0
ASV568	d__Bacteria; p__Bacteroidota; c__Bacteroidia; o__Bacteroidales; f__Prevotellaceae; g__uncultured; s__uncultured bacterium	0	0	0	0	20	0	0	0	0	0	0	0	0	0	69	36	0	0	0	0	39	0	0	0
ASV569	d__Bacteria; p__Bacteroidota; c__Bacteroidia; o__Bacteroidales; f__Prevotellaceae; g__Prevotella; s__uncultured rumen bacterium	0	0	0	22	67	0	0	0	0	0	0	0	0	0	0	0	0	0	0	0	9	0	0	0
ASV570	d__Bacteria; p__Bacteroidota; c__Bacteroidia; o__Bacteroidales; f__F082; g__norank; s__uncultured rumen bacterium	120	0	0	0	0	0	0	0	0	0	0	0	0	14	0	0	0	0	0	0	0	0	0	0
ASV571	d__Bacteria; p__Firmicutes; c__Clostridia; o__Christensenellales; f__Christensenellaceae; g__Christensenellaceae R-7 group; s__uncultured rumen bacterium	38	10	0	7	0	0	0	0	0	0	20	0	0	0	14	0	0	32	0	0	0	0	0	31
ASV572	d__Bacteria; p__Firmicutes; c__Clostridia; o__Oscillospirales; f__Ruminococcaceae; g__uncultured; s__uncultured rumen bacterium	10	0	0	0	4	0	7	12	5	0	0	0	10	0	9	13	0	0	10	0	7	19	9	24
ASV573	d__Bacteria; p__Fibrobacterota; c__Fibrobacteria; o__Fibrobacterales; f__Fibrobacteraceae; g__Fibrobacter; s__Fibrobacter succinogenes subsp. succinogenes S85	0	0	0	0	0	0	0	0	0	83	0	0	0	0	0	0	39	0	0	28	0	0	0	0
ASV574	d__Bacteria; p__Firmicutes; c__Clostridia; o__Oscillospirales; f__Ruminococcaceae; g__Ruminococcus; s__uncultured rumen bacterium	17	0	0	0	0	0	0	16	0	24	0	28	0	19	0	0	0	0	0	0	23	0	0	0
ASV575	d__Bacteria; p__Bacteroidota; c__Bacteroidia; o__Bacteroidales; f__Muribaculaceae; g__norank; s__uncultured bacterium	0	15	21	3	5	0	0	0	0	0	0	12	0	0	35	24	4	0	0	0	13	0	18	0
ASV576	d__Bacteria; p__Firmicutes; c__Clostridia; o__Lachnospirales; f__Lachnospiraceae; g__Lachnospiraceae NK3A20 group	27	9	0	10	0	0	0	0	0	0	0	0	17	0	24	0	0	17	0	0	13	0	27	0
ASV577	d__Bacteria; p__Bacteroidota; c__Bacteroidia; o__Bacteroidales; f__F082; g__norank; s__uncultured rumen bacterium	0	0	124	0	0	0	0	0	0	0	43	0	0	0	0	0	0	0	0	0	0	0	0	0
ASV578	d__Bacteria; p__Bacteroidota; c__Bacteroidia; o__Bacteroidales; f__Rikenellaceae; g__Rikenellaceae RC9 gut group; s__uncultured bacterium	35	0	0	10	0	17	0	16	0	0	0	0	0	16	0	0	11	0	0	0	16	0	0	0
ASV579	d__Bacteria; p__Firmicutes; c__Clostridia; o__Christensenellales; f__Christensenellaceae; g__Christensenellaceae R-7 group; s__uncultured bacterium	18	0	0	8	0	0	0	0	17	0	38	0	22	0	19	0	0	0	9	0	0	0	0	12
ASV580	d__Bacteria; p__Bacteroidota; c__Bacteroidia; o__Bacteroidales; f__F082; g__norank; s__uncultured rumen bacterium	0	0	0	0	0	0	0	0	0	0	11	0	22	0	74	1	0	0	12	0	0	0	33	24
ASV581	d__Bacteria; p__Firmicutes; c__Clostridia; o__Lachnospirales; f__Lachnospiraceae; g__[Eubacterium] eligens group; s__uncultured bacterium	0	0	0	0	0	21	0	0	24	9	0	0	0	30	0	0	51	0	0	0	0	0	0	0
ASV582	d__Bacteria; p__Bacteroidota; c__Bacteroidia; o__Bacteroidales; f__Prevotellaceae; g__Prevotella; s__uncultured rumen bacterium	0	0	0	0	0	0	45	0	0	0	0	0	40	0	13	0	0	0	0	39	23	0	5	0
ASV583	d__Bacteria; p__Firmicutes; c__Negativicutes; o__Veillonellales-Selenomonadales; f__Selenomonadaceae; g__Anaerovibrio; s__uncultured bacterium	0	0	0	0	0	0	0	0	0	0	0	0	45	0	0	0	0	0	57	0	0	32	0	13
ASV584	d__Bacteria; p__Bacteroidota; c__Bacteroidia; o__Bacteroidales; f__Prevotellaceae; g__Prevotella; s__uncultured rumen bacterium	0	0	0	0	0	0	0	0	0	0	0	0	0	0	0	0	0	0	0	190	0	0	0	0
ASV585	d__Bacteria; p__Bacteroidota; c__Bacteroidia; o__Bacteroidales; f__Rikenellaceae; g__Rikenellaceae RC9 gut group; s__uncultured rumen bacterium	46	19	0	9	0	0	0	0	8	0	0	0	9	5	0	0	0	0	0	0	32	0	0	0
ASV586	d__Bacteria; p__Bacteroidota; c__Bacteroidia; o__Bacteroidales; f__F082; g__norank; s__uncultured rumen bacterium	0	20	0	0	0	0	0	0	0	0	0	0	0	0	0	32	0	0	0	0	0	76	0	0
ASV587	d__Bacteria; p__Bacteroidota; c__Bacteroidia; o__Bacteroidales; f__Prevotellaceae; g__Prevotellaceae UCG-001; s__uncultured rumen bacterium	8	18	20	0	0	0	0	0	0	0	0	18	13	0	0	0	0	0	5	16	0	11	16	20
ASV588	d__Bacteria; p__Synergistota; c__Synergistia; o__Synergistales; f__Synergistaceae; g__Pyramidobacter; s__uncultured rumen bacterium	21	0	0	15	21	6	0	22	0	0	0	0	0	12	0	0	19	0	0	0	0	0	0	9
ASV589	d__Bacteria; p__Bacteroidota; c__Bacteroidia; o__Bacteroidales; f__Prevotellaceae; g__Prevotella; s__uncultured rumen bacterium	27	0	0	40	22	0	0	0	0	0	0	0	0	0	20	0	0	0	0	0	0	0	0	0
ASV590	d__Bacteria; p__Bacteroidota; c__Bacteroidia; o__Bacteroidales; f__F082; g__norank; s__uncultured bacterium	0	0	18	0	0	0	0	0	0	0	16	0	34	0	21	0	0	0	9	0	5	4	31	13
ASV591	d__Bacteria; p__Firmicutes; c__Clostridia; o__Lachnospirales; f__Lachnospiraceae; g__Lachnospiraceae NK4A136 group; s__uncultured rumen bacterium	16	0	0	12	12	0	12	5	29	0	5	4	8	0	0	0	0	0	0	0	19	0	0	0
ASV592	d__Bacteria; p__Firmicutes; c__Clostridia; o__Lachnospirales; f__Lachnospiraceae; g__uncultured	27	0	0	0	0	0	0	26	0	0	0	0	16	15	0	0	27	0	0	0	16	0	0	0
ASV593	d__Bacteria; p__Firmicutes; c__Clostridia; o__Lachnospirales; f__Lachnospiraceae; g__[Eubacterium] ruminantium group; s__uncultured rumen bacterium	18	0	0	0	0	21	0	8	40	0	0	0	0	18	0	0	0	0	0	0	24	0	0	0
ASV594	d__Bacteria; p__Bacteroidota; c__Bacteroidia; o__Bacteroidales; f__Prevotellaceae; g__Prevotellaceae UCG-001; s__uncultured rumen bacterium	0	26	18	0	0	8	0	11	0	0	0	0	4	0	0	9	0	19	0	26	4	0	0	6
ASV595	d__Bacteria; p__Spirochaetota; c__Spirochaetia; o__Spirochaetales; f__Spirochaetaceae; g__Treponema; s__uncultured bacterium	0	9	0	0	0	0	0	4	0	0	18	18	15	0	12	5	0	23	0	0	0	0	16	21
ASV596	d__Bacteria; p__Bacteroidota; c__Bacteroidia; o__Bacteroidales; f__Rikenellaceae; g__Rikenellaceae RC9 gut group; s__uncultured rumen bacterium	0	20	0	0	0	0	0	0	0	0	0	0	23	0	0	0	0	22	0	0	0	22	0	31
ASV597	d__Bacteria; p__Bacteroidota; c__Bacteroidia; o__Bacteroidales; f__Prevotellaceae; g__Prevotella; s__uncultured rumen bacterium	0	0	23	3	11	0	0	0	0	0	0	0	0	0	27	9	0	0	14	33	0	0	23	14
ASV598	d__Bacteria; p__Firmicutes; c__Clostridia; o__Oscillospirales; f__Ruminococcaceae; g__Ruminococcus; s__uncultured bacterium	0	35	0	0	0	0	0	0	0	0	0	12	0	0	49	0	0	0	0	0	0	0	0	40
ASV599	d__Bacteria; p__Firmicutes; c__Clostridia; o__Oscillospirales; f__Ruminococcaceae; g__Candidatus Soleaferrea; s__uncultured rumen bacterium	0	45	42	0	0	0	0	0	0	0	0	0	18	0	0	0	0	0	0	48	0	0	0	0
ASV600	d__Bacteria; p__Firmicutes; c__Clostridia; o__Lachnospirales; f__Lachnospiraceae; g__Anaerosporobacter; s__uncultured bacterium	0	0	0	0	32	0	0	58	0	0	0	0	0	0	0	0	0	0	0	0	19	0	0	0
ASV601	d__Bacteria; p__Firmicutes; c__Clostridia; o__Oscillospirales; f__Ruminococcaceae; g__Ruminococcus; s__uncultured bacterium	0	0	0	0	0	0	0	0	0	0	0	29	0	0	0	40	0	35	0	0	0	27	0	0
ASV602	d__Bacteria; p__Bacteroidota; c__Bacteroidia; o__Bacteroidales; f__Prevotellaceae; g__Prevotella; s__uncultured rumen bacterium	0	77	0	30	0	0	0	0	0	0	0	0	0	0	0	0	0	0	0	0	0	0	0	0
ASV603	d__Bacteria; p__Firmicutes; c__Clostridia; o__Lachnospirales; f__Lachnospiraceae; g__Lachnospiraceae UCG-001; s__uncultured bacterium	0	0	0	0	0	0	0	0	0	51	0	0	0	34	0	0	52	0	0	0	0	0	0	0
ASV604	d__Bacteria; p__Bacteroidota; c__Bacteroidia; o__Bacteroidales; f__F082; g__norank; s__uncultured rumen bacterium	4	0	13	0	0	0	8	0	0	0	15	0	11	0	0	0	0	34	17	0	7	0	18	11
ASV605	d__Bacteria; p__Bacteroidota; c__Bacteroidia; o__Bacteroidales; f__Muribaculaceae; g__norank; s__uncultured bacterium	0	0	39	0	0	0	0	0	0	0	0	0	0	0	88	0	0	0	25	0	0	0	34	0
ASV606	d__Bacteria; p__Bacteroidota; c__Bacteroidia; o__Bacteroidales; f__Prevotellaceae; g__Prevotella; s__uncultured rumen bacterium	0	0	0	0	0	0	0	102	0	0	0	0	0	0	0	0	0	0	0	0	0	0	0	0
ASV607	d__Bacteria; p__Bacteroidota; c__Bacteroidia; o__Bacteroidales; f__Prevotellaceae; g__Prevotella; s__uncultured bacterium	0	0	0	0	41	0	0	0	0	0	0	0	0	0	0	0	0	0	0	0	56	0	0	0
ASV608	d__Bacteria; p__Bacteroidota; c__Bacteroidia; o__Bacteroidales; f__Prevotellaceae; g__Prevotellaceae UCG-003; s__uncultured rumen bacterium	0	52	34	0	0	0	0	0	0	0	0	0	0	0	0	0	0	0	0	0	0	38	0	0
ASV609	d__Bacteria; p__Firmicutes; c__Clostridia; o__Lachnospirales; f__Lachnospiraceae; g__Butyrivibrio; s__uncultured rumen bacterium	0	0	0	0	0	0	0	0	0	0	0	66	0	0	0	0	0	29	38	0	0	0	0	0
ASV610	d__Bacteria; p__Bacteroidota; c__Bacteroidia; o__Bacteroidales; f__Rikenellaceae; g__Rikenellaceae RC9 gut group; s__uncultured bacterium	1	15	0	0	6	0	0	0	0	0	0	7	41	0	0	8	0	8	11	18	6	0	11	0
ASV611	d__Bacteria; p__Firmicutes; c__Clostridia; o__Oscillospirales; f__Ruminococcaceae; g__CAG-352; s__uncultured rumen bacterium	0	0	0	0	0	0	0	0	0	0	44	0	24	0	31	0	0	0	0	0	0	0	60	0
ASV612	d__Bacteria; p__Firmicutes; c__Clostridia; o__Oscillospirales; f__Ruminococcaceae; g__UCG-001; s__uncultured bacterium	0	0	0	0	0	72	0	6	53	0	0	0	0	0	0	0	0	0	0	0	0	0	0	0
ASV613	d__Bacteria; p__Bacteroidota; c__Bacteroidia; o__Bacteroidales; f__Rikenellaceae; g__Rikenellaceae RC9 gut group; s__uncultured bacterium	8	6	21	0	0	0	0	16	0	0	0	13	15	0	16	0	0	5	0	0	0	5	15	11
ASV614	d__Bacteria; p__Bacteroidota; c__Bacteroidia; o__Bacteroidales; f__F082; g__norank; s__uncultured rumen bacterium	0	14	0	0	11	0	0	0	0	0	20	0	36	0	0	0	0	14	21	14	7	0	0	0
ASV615	d__Bacteria; p__Bacteroidota; c__Bacteroidia; o__Bacteroidales; f__Prevotellaceae; g__Prevotella; s__uncultured rumen bacterium	0	0	82	6	0	0	0	0	0	0	0	0	0	0	0	48	0	0	0	0	0	0	0	0
ASV616	d__Bacteria; p__Firmicutes; c__Bacilli; o__Erysipelotrichales; f__Erysipelatoclostridiaceae; g__UCG-004	4	12	0	4	7	0	8	0	0	0	7	0	17	0	18	7	0	0	17	0	7	6	8	13
ASV617	d__Bacteria; p__Firmicutes; c__Clostridia; o__Lachnospirales; f__Lachnospiraceae; g__[Ruminococcus] gauvreauii group; s__uncultured bacterium	0	30	0	0	0	17	0	0	0	0	0	0	0	0	0	11	0	20	25	0	0	0	18	11
ASV618	d__Bacteria; p__Bacteroidota; c__Bacteroidia; o__Bacteroidales; f__p-251-o5; g__norank; s__uncultured rumen bacterium	0	0	73	0	0	0	0	0	0	0	0	0	0	0	0	14	0	0	0	0	0	0	0	32
ASV619	d__Bacteria; p__Bacteroidota; c__Bacteroidia; o__Bacteroidales; f__Rikenellaceae; g__Rikenellaceae RC9 gut group; s__uncultured rumen bacterium	0	11	0	0	0	7	0	0	10	3	18	4	12	0	0	0	0	9	17	10	0	5	0	22
ASV620	d__Bacteria; p__Bacteroidota; c__Bacteroidia; o__Bacteroidales; f__Prevotellaceae; g__Prevotella; s__uncultured rumen bacterium	0	0	133	0	0	0	0	0	0	0	0	0	0	0	21	0	0	0	0	0	0	0	0	0
ASV621	d__Bacteria; p__Bacteroidota; c__Bacteroidia; o__Bacteroidales; f__Rikenellaceae; g__Rikenellaceae RC9 gut group; s__uncultured rumen bacterium	86	0	0	20	0	0	0	0	0	7	0	0	0	0	0	0	0	0	0	0	13	0	0	0
ASV622	d__Bacteria; p__Bacteroidota; c__Bacteroidia; o__Bacteroidales; f__Prevotellaceae; g__Prevotella	0	0	36	0	36	0	0	0	0	0	0	21	30	0	0	0	0	0	0	0	0	0	0	0
ASV623	d__Bacteria; p__Bacteroidota; c__Bacteroidia; o__Bacteroidales; f__Muribaculaceae; g__norank; s__uncultured bacterium	0	0	0	0	0	0	0	0	0	0	0	0	0	0	97	0	0	0	0	0	0	51	0	0
ASV624	d__Bacteria; p__Bacteroidota; c__Bacteroidia; o__Bacteroidales; f__Prevotellaceae; g__Prevotella; s__uncultured bacterium	0	0	0	0	0	0	0	0	0	0	0	0	0	0	0	0	0	0	144	0	0	0	0	0
ASV625	d__Bacteria; p__Firmicutes; c__Clostridia; o__Oscillospirales; f__Ruminococcaceae; g__Ruminococcus; s__uncultured bacterium	75	0	0	0	0	0	0	0	0	0	0	0	0	0	0	0	0	0	0	0	36	0	0	0
ASV626	d__Bacteria; p__Bacteroidota; c__Bacteroidia; o__Bacteroidales; f__Prevotellaceae; g__Prevotella; s__uncultured rumen bacterium	0	34	0	0	0	0	0	0	0	0	0	22	0	0	0	0	0	0	0	19	0	0	23	38
ASV627	d__Bacteria; p__Bacteroidota; c__Bacteroidia; o__Bacteroidales; f__Prevotellaceae; g__Prevotellaceae UCG-001; s__uncultured bacterium	0	0	0	0	0	0	0	0	0	0	0	93	0	0	0	31	0	0	0	0	0	0	0	0
ASV628	d__Bacteria; p__Firmicutes; c__Clostridia; o__Oscillospirales; f__Hungateiclostridiaceae; g__Saccharofermentans; s__uncultured bacterium	20	0	0	12	0	0	13	16	10	0	0	0	0	8	0	0	0	0	0	0	31	0	0	0
ASV629	d__Bacteria; p__Firmicutes; c__Clostridia; o__Oscillospirales; f__Oscillospiraceae; g__UCG-005; s__uncultured bacterium	0	0	72	0	0	0	57	0	0	0	0	0	0	0	0	20	0	0	0	0	0	0	0	0
ASV630	d__Bacteria; p__Bacteroidota; c__Bacteroidia; o__Bacteroidales; f__Prevotellaceae; g__Prevotella; s__uncultured rumen bacterium	0	0	0	0	22	0	0	23	0	0	0	0	0	0	0	0	0	0	0	0	22	25	0	0
ASV631	d__Bacteria; p__Firmicutes; c__Clostridia; o__Christensenellales; f__Christensenellaceae; g__Christensenellaceae R-7 group; s__uncultured rumen bacterium	0	0	0	0	0	21	0	0	0	0	0	0	0	0	0	0	0	0	102	22	0	0	0	0
ASV632	d__Bacteria; p__Bacteroidota; c__Bacteroidia; o__Bacteroidales; f__Prevotellaceae; g__Prevotella; s__uncultured rumen bacterium	0	0	0	0	0	0	0	52	44	0	0	0	0	0	0	0	0	0	0	0	0	0	0	22
ASV633	d__Bacteria; p__Firmicutes; c__Clostridia; o__Clostridia UCG-014; f__norank; g__norank; s__uncultured rumen bacterium	0	0	35	0	0	0	0	0	0	0	0	0	18	0	24	6	0	0	0	0	0	13	33	17
ASV634	d__Bacteria; p__Bacteroidota; c__Bacteroidia; o__Bacteroidales; f__Prevotellaceae; g__Prevotella; s__uncultured bacterium	0	0	0	0	0	0	0	94	0	0	0	0	0	0	0	0	0	0	0	0	0	0	0	0
ASV635	d__Bacteria; p__Bacteroidota; c__Bacteroidia; o__Bacteroidales; f__Prevotellaceae; g__Prevotellaceae UCG-001	12	0	0	4	10	0	0	41	6	0	0	0	0	0	0	0	0	0	11	0	15	0	0	6
ASV636	d__Bacteria; p__Bacteroidota; c__Bacteroidia; o__Bacteroidales; f__Prevotellaceae; g__Prevotella; s__uncultured rumen bacterium	8	18	0	0	0	0	0	0	0	0	0	0	0	0	12	18	0	18	0	0	8	0	35	5
ASV637	d__Bacteria; p__Bacteroidota; c__Bacteroidia; o__Bacteroidales; f__Prevotellaceae; g__Prevotella; s__uncultured rumen bacterium	0	10	31	0	0	0	7	0	0	0	0	0	15	0	17	18	0	0	0	0	0	0	22	16
ASV638	d__Bacteria; p__Bacteroidota; c__Bacteroidia; o__Bacteroidales; f__Prevotellaceae; g__Prevotella; s__uncultured rumen bacterium	0	7	0	0	0	0	33	0	0	0	0	15	0	0	0	27	0	12	0	0	16	10	13	0
ASV639	d__Bacteria; p__Bacteroidota; c__Bacteroidia; o__Bacteroidales; f__Prevotellaceae; g__Prevotella; s__uncultured rumen bacterium	0	0	21	0	0	0	0	0	0	8	23	0	0	0	0	0	0	39	0	0	0	0	0	28
ASV640	d__Bacteria; p__Fibrobacterota; c__Fibrobacteria; o__Fibrobacterales; f__Fibrobacteraceae; g__Fibrobacter	0	0	0	31	0	0	0	0	85	0	0	0	0	0	0	0	0	0	0	0	0	0	0	0
ASV641	d__Bacteria; p__Synergistota; c__Synergistia; o__Synergistales; f__Synergistaceae; g__Pyramidobacter	0	0	0	0	0	31	0	0	43	0	0	0	0	25	0	0	22	0	0	0	0	0	0	0
ASV642	d__Bacteria; p__Bacteroidota; c__Bacteroidia; o__Bacteroidales; f__Prevotellaceae; g__Prevotella; s__uncultured rumen bacterium	0	13	0	0	9	0	0	0	0	0	0	14	0	0	0	14	0	0	7	0	11	14	0	29
ASV643	d__Bacteria; p__Bacteroidota; c__Bacteroidia; o__Bacteroidales; f__Prevotellaceae; g__Prevotella; s__uncultured rumen bacterium	0	40	0	0	0	0	0	0	0	0	0	0	18	0	0	0	0	0	0	0	0	0	0	47
ASV644	d__Bacteria; p__Firmicutes; c__Clostridia; o__Oscillospirales; f__Ruminococcaceae; g__Ruminococcus; s__uncultured rumen bacterium	0	18	0	0	11	0	0	0	0	0	0	0	31	0	0	0	0	0	17	0	15	0	17	0
ASV645	d__Bacteria; p__Bacteroidota; c__Bacteroidia; o__Bacteroidales; f__Prevotellaceae; g__Prevotellaceae UCG-001; s__uncultured rumen bacterium	0	0	0	13	0	0	42	0	0	0	0	0	0	0	0	15	0	0	38	0	15	0	0	0
ASV646	d__Bacteria; p__Firmicutes; c__Clostridia; o__Lachnospirales; f__Lachnospiraceae; g__[Eubacterium] ruminantium group; s__Eubacterium ruminantium	0	0	0	0	0	10	0	33	15	0	0	0	0	0	0	12	0	0	0	0	13	0	27	0
ASV647	d__Bacteria; p__Bacteroidota; c__Bacteroidia; o__Bacteroidales; f__Prevotellaceae; g__Prevotellaceae NK3B31 group; s__uncultured rumen bacterium	0	0	0	0	0	0	30	44	0	0	0	0	0	15	0	0	0	0	0	0	20	0	0	0
ASV648	d__Bacteria; p__Bacteroidota; c__Bacteroidia; o__Bacteroidales; f__Prevotellaceae; g__Prevotella; s__uncultured rumen bacterium	0	17	21	2	0	0	0	0	0	0	0	0	3	0	17	0	0	15	10	0	0	17	20	0
ASV649	d__Bacteria; p__Firmicutes; c__Clostridia; o__Clostridia UCG-014; f__norank; g__norank	0	0	0	44	0	0	0	40	0	0	0	0	0	0	0	0	0	0	0	0	0	16	0	0
ASV650	d__Bacteria; p__Bacteroidota; c__Bacteroidia; o__Bacteroidales; f__Prevotellaceae; g__Prevotellaceae UCG-001; s__uncultured rumen bacterium	0	0	0	0	0	0	0	0	0	0	0	0	0	0	0	0	0	0	0	160	0	0	0	0
ASV651	d__Bacteria; p__Bacteroidota; c__Bacteroidia; o__Bacteroidales; f__Prevotellaceae; g__Prevotella; s__uncultured bacterium	0	22	14	0	0	0	0	0	0	0	0	23	0	0	10	0	0	4	0	0	8	16	10	10
ASV652	d__Bacteria; p__Firmicutes; c__Clostridia; o__Oscillospirales; f__Ruminococcaceae; g__Ruminococcus; s__uncultured rumen bacterium	0	20	32	0	0	0	13	0	0	0	0	28	0	0	0	0	0	0	0	42	0	0	0	0
ASV653	d__Bacteria; p__Bacteroidota; c__Bacteroidia; o__Bacteroidales; f__Prevotellaceae; g__Prevotella; s__uncultured bacterium	0	0	0	17	0	0	0	0	0	0	0	0	0	0	0	10	0	0	27	0	11	12	0	20
ASV654	d__Bacteria; p__Bacteroidota; c__Bacteroidia; o__Bacteroidales; f__Muribaculaceae; g__norank; s__uncultured bacterium	0	0	0	0	0	0	0	0	0	0	0	16	16	0	0	0	0	17	0	0	51	0	0	0
ASV655	d__Bacteria; p__Firmicutes; c__Clostridia; o__Clostridia UCG-014; f__norank; g__norank; s__uncultured bacterium	0	0	0	18	25	18	0	0	16	0	0	0	0	9	0	0	0	0	0	0	0	0	0	0
ASV656	d__Bacteria; p__Bacteroidota; c__Bacteroidia; o__Bacteroidales; f__Prevotellaceae; g__Prevotellaceae UCG-003	0	0	0	0	0	0	0	0	0	0	0	0	0	0	0	0	0	0	0	156	0	0	0	0
ASV657	d__Bacteria; p__Bacteroidota; c__Bacteroidia; o__Bacteroidales; f__Prevotellaceae; g__Prevotellaceae UCG-003; s__uncultured bacterium	0	16	24	0	0	0	0	0	0	0	0	12	0	0	8	0	0	18	0	0	0	13	27	0
ASV658	d__Bacteria; p__Firmicutes; c__Clostridia; o__Christensenellales; f__Christensenellaceae; g__Christensenellaceae R-7 group; s__uncultured bacterium	0	0	0	0	0	0	8	8	0	0	0	18	0	0	55	11	0	20	24	0	0	0	0	0
ASV659	d__Bacteria; p__Bacteroidota; c__Bacteroidia; o__Bacteroidales; f__Muribaculaceae; g__norank; s__uncultured bacterium	12	0	0	0	0	0	0	0	0	0	0	0	16	0	0	0	0	19	43	0	5	14	0	0
ASV660	d__Bacteria; p__Firmicutes; c__Clostridia; o__Lachnospirales; f__Lachnospiraceae; g__Lachnospiraceae NK3A20 group; s__uncultured bacterium	0	17	0	0	23	0	0	0	0	0	22	0	8	0	0	0	0	0	0	0	21	0	0	14
ASV661	d__Bacteria; p__Bacteroidota; c__Bacteroidia; o__Bacteroidales; f__Prevotellaceae; g__Prevotella; s__uncultured bacterium	0	0	0	0	40	0	0	0	0	0	0	0	0	0	0	0	0	0	0	0	45	0	0	0
ASV662	d__Bacteria; p__Firmicutes; c__Clostridia; o__Clostridia UCG-014; f__norank; g__norank; s__uncultured bacterium	13	0	0	0	0	0	5	0	0	0	0	0	0	0	0	0	0	0	14	24	0	8	0	28
ASV663	d__Bacteria; p__Firmicutes; c__Clostridia; o__Clostridia UCG-014; f__norank; g__norank; s__uncultured bacterium	29	29	19	0	0	0	0	0	0	0	0	0	0	0	14	0	0	0	0	33	0	0	0	0
ASV664	d__Bacteria; p__Fibrobacterota; c__Fibrobacteria; o__Fibrobacterales; f__Fibrobacteraceae; g__Fibrobacter	0	0	25	0	0	0	0	19	0	16	0	0	37	0	0	0	0	0	0	19	0	0	0	0
ASV665	d__Bacteria; p__Bacteroidota; c__Bacteroidia; o__Bacteroidales; f__Prevotellaceae; g__Prevotella; s__uncultured rumen bacterium	0	0	0	33	0	0	0	0	0	0	0	0	0	0	0	33	0	0	0	0	21	0	0	0
ASV666	d__Bacteria; p__Bacteroidota; c__Bacteroidia; o__Bacteroidales; f__Prevotellaceae; g__Prevotellaceae Ga6A1 group	0	0	0	33	0	0	0	0	0	0	0	14	0	0	0	0	0	46	0	0	0	0	0	0
ASV667	d__Bacteria; p__Firmicutes; c__Clostridia; o__Lachnospirales; f__Lachnospiraceae; g__Pseudobutyrivibrio; s__uncultured rumen bacterium	0	0	0	0	31	0	29	15	0	0	0	0	0	0	0	0	0	12	26	0	0	0	0	0
ASV668	d__Bacteria; p__Firmicutes; c__Clostridia; o__Clostridiales; f__Clostridiaceae; g__Clostridium sensu stricto 1; s__uncultured bacterium	0	0	0	0	0	41	0	0	42	0	0	0	0	0	0	0	0	0	0	0	23	0	0	0
ASV669	d__Bacteria; p__Firmicutes; c__Clostridia; o__Clostridia UCG-014; f__norank; g__norank; s__uncultured bacterium	0	0	0	0	0	0	0	0	0	0	127	0	0	0	0	0	0	0	0	0	0	0	0	0
ASV670	d__Bacteria; p__Firmicutes; c__Clostridia; o__Clostridia UCG-014; f__norank; g__norank; s__uncultured rumen bacterium	0	0	0	0	0	0	0	0	0	0	0	17	0	0	0	30	0	0	0	0	0	0	34	34
ASV671	d__Bacteria; p__Firmicutes; c__Clostridia; o__Lachnospirales; f__Lachnospiraceae; g__Lachnospiraceae NK3A20 group; s__uncultured bacterium	0	0	0	0	0	0	0	0	0	0	0	0	0	0	0	0	0	0	0	151	0	0	0	0
ASV672	d__Bacteria; p__Firmicutes; c__Clostridia; o__Clostridia UCG-014; f__norank; g__norank; s__uncultured rumen bacterium	25	0	0	0	0	0	0	10	0	24	0	0	0	0	24	0	18	0	0	0	0	12	0	0
ASV673	d__Bacteria; p__Bacteroidota; c__Bacteroidia; o__Bacteroidales; f__Prevotellaceae; g__Prevotella; s__uncultured rumen bacterium	13	0	0	17	5	17	0	0	0	14	0	0	0	16	0	0	20	0	0	0	0	0	0	0
ASV674	d__Bacteria; p__Firmicutes; c__Clostridia; o__Oscillospirales; f__Oscillospiraceae; g__UCG-002; s__uncultured bacterium	0	0	75	0	0	0	0	0	0	14	0	0	0	18	25	0	0	0	0	0	0	0	0	0
ASV675	d__Bacteria; p__Bacteroidota; c__Bacteroidia; o__Bacteroidales; f__Muribaculaceae; g__norank; s__uncultured rumen bacterium	0	0	0	0	0	0	0	0	0	0	0	19	30	0	64	0	0	0	0	0	0	18	0	0
ASV676	d__Bacteria; p__Firmicutes; c__Clostridia; o__Oscillospirales; f__Hungateiclostridiaceae; g__Saccharofermentans; s__uncultured rumen bacterium	19	0	18	27	0	0	0	7	0	0	0	0	7	0	0	0	0	0	0	0	11	0	0	0
ASV677	d__Bacteria; p__Bacteroidota; c__Bacteroidia; o__Bacteroidales; f__Rikenellaceae; g__Rikenellaceae RC9 gut group; s__uncultured bacterium	7	0	7	0	0	0	0	0	0	0	20	0	18	0	16	0	0	0	14	0	15	0	9	16
ASV678	d__Bacteria; p__Firmicutes; c__Clostridia; o__Christensenellales; f__Christensenellaceae; g__Christensenellaceae R-7 group; s__uncultured bacterium	0	14	0	0	0	0	0	0	0	0	0	0	23	0	54	0	0	0	12	0	0	22	0	0
ASV679	d__Bacteria; p__Bacteroidota; c__Bacteroidia; o__Bacteroidales; f__Prevotellaceae; g__Prevotella; s__uncultured rumen bacterium	0	0	0	0	0	0	0	0	0	0	0	0	30	0	0	0	0	0	0	0	0	66	0	0
ASV680	d__Bacteria; p__Firmicutes; c__Clostridia; o__Oscillospirales; f__Ruminococcaceae; g__uncultured; s__uncultured rumen bacterium	0	0	27	0	0	0	0	0	0	0	0	0	59	0	0	0	0	0	0	0	0	31	0	0
ASV681	d__Bacteria; p__Firmicutes; c__Clostridia; o__Lachnospirales; f__Lachnospiraceae; g__Roseburia; s__uncultured bacterium	0	0	7	5	10	0	12	0	0	0	28	0	0	0	0	12	0	0	0	0	14	18	0	0
ASV682	Unclassified	0	0	0	0	0	0	0	6	0	0	24	5	10	3	15	0	0	0	9	0	2	6	8	27
ASV683	d__Bacteria; p__Firmicutes; c__Clostridia; o__Lachnospirales; f__Lachnospiraceae; g__Lachnospiraceae NK3A20 group	0	18	0	0	0	0	0	0	0	0	34	0	26	0	0	22	0	13	0	0	0	0	0	0
ASV684	d__Bacteria; p__Firmicutes; c__Clostridia; o__Oscillospirales; f__Ruminococcaceae; g__uncultured; s__uncultured rumen bacterium	0	22	0	0	0	0	0	0	0	0	20	19	14	0	32	0	0	0	0	0	0	0	24	0
ASV685	d__Bacteria; p__Bacteroidota; c__Bacteroidia; o__Bacteroidales; f__Prevotellaceae; g__Prevotella; s__uncultured bacterium	0	17	15	0	0	0	0	0	0	0	17	8	28	0	0	0	0	0	21	0	0	0	0	4
ASV686	d__Bacteria; p__Proteobacteria; c__Alphaproteobacteria; o__Rhodospirillales; f__uncultured; g__norank; s__uncultured bacterium	0	0	0	0	20	0	0	24	25	0	0	0	4	0	0	0	0	0	0	0	0	0	0	17
ASV687	d__Bacteria; p__Firmicutes; c__Clostridia; o__Lachnospirales; f__Lachnospiraceae; g__probable genus 10; s__uncultured bacterium	0	0	0	0	21	0	0	0	0	0	0	24	0	0	24	0	0	0	0	0	12	0	38	0
ASV688	d__Bacteria; p__Bacteroidota; c__Bacteroidia; o__Bacteroidales; f__Rikenellaceae; g__Rikenellaceae RC9 gut group; s__uncultured rumen bacterium	24	0	0	0	10	0	0	10	5	0	0	0	16	0	0	7	6	0	0	0	10	9	0	0
ASV689	d__Bacteria; p__Firmicutes; c__Negativicutes; o__Veillonellales-Selenomonadales; f__Selenomonadaceae; g__Selenomonas	34	0	0	0	0	28	0	0	0	0	0	0	0	32	0	0	0	0	0	0	0	0	0	0
ASV690	d__Bacteria; p__Bacteroidota; c__Bacteroidia; o__Bacteroidales; f__F082; g__norank; s__uncultured rumen bacterium	0	0	0	0	0	0	0	0	0	0	0	0	0	0	0	0	0	0	0	46	10	0	79	0
ASV691	d__Bacteria; p__Bacteroidota; c__Bacteroidia; o__Bacteroidales; f__Prevotellaceae; g__Prevotella; s__uncultured bacterium	44	0	0	28	0	0	0	0	0	0	0	0	0	30	0	0	0	0	0	0	0	0	0	0
ASV692	d__Bacteria; p__Firmicutes; c__Clostridia; o__Oscillospirales; f__Oscillospiraceae; g__NK4A214 group; s__uncultured rumen bacterium	10	0	0	4	0	0	0	0	0	0	13	0	18	0	10	0	0	0	10	42	0	0	10	0
ASV693	d__Bacteria; p__Firmicutes; c__Clostridia; o__Oscillospirales; f__Ruminococcaceae; g__CAG-352; s__uncultured bacterium	0	0	0	0	0	0	0	0	0	0	0	36	0	0	35	0	0	34	0	0	0	0	0	0
ASV694	d__Bacteria; p__Bacteroidota; c__Bacteroidia; o__Bacteroidales; f__Rikenellaceae; g__U29-B03; s__uncultured bacterium	0	13	0	5	0	0	15	0	0	0	0	9	9	0	0	0	0	20	0	0	0	16	0	13
ASV695	d__Bacteria; p__Bacteroidota; c__Bacteroidia; o__Bacteroidales; f__Prevotellaceae; g__Prevotella; s__uncultured rumen bacterium	0	8	13	0	0	0	0	0	0	0	0	18	0	0	17	0	0	8	13	0	6	10	22	0
ASV696	d__Bacteria; p__Bacteroidota; c__Bacteroidia; o__Bacteroidales; f__Muribaculaceae; g__norank; s__uncultured rumen bacterium	0	19	0	0	0	0	0	0	0	0	0	0	0	0	0	25	0	15	0	0	0	0	44	8
ASV697	d__Bacteria; p__Bacteroidota; c__Bacteroidia; o__Bacteroidales; f__Prevotellaceae; g__Prevotella; s__uncultured bacterium	0	0	74	0	0	0	0	0	0	0	0	55	0	0	0	0	0	0	0	0	0	0	0	0
ASV698	d__Bacteria; p__Firmicutes; c__Clostridia; o__Oscillospirales; f__Oscillospiraceae; g__NK4A214 group; s__uncultured bacterium	0	0	0	5	6	0	0	0	0	0	0	0	0	0	51	22	0	12	0	0	12	0	0	0
ASV699	d__Bacteria; p__Bacteroidota; c__Bacteroidia; o__Bacteroidales; f__Rikenellaceae; g__Rikenellaceae RC9 gut group; s__uncultured rumen bacterium	0	0	0	0	0	12	0	53	0	0	0	0	0	0	9	0	0	0	0	0	0	0	10	12
ASV700	d__Bacteria; p__Bacteroidota; c__Bacteroidia; o__Bacteroidales; f__Muribaculaceae; g__norank; s__uncultured rumen bacterium	0	0	0	0	0	0	0	0	0	0	45	0	0	0	0	0	0	0	30	0	28	0	0	0
ASV701	d__Bacteria; p__Bacteroidota; c__Bacteroidia; o__Bacteroidales; f__Rikenellaceae; g__Rikenellaceae RC9 gut group; s__uncultured bacterium	12	0	0	12	24	0	0	0	0	0	0	0	24	0	0	0	0	0	0	0	0	25	0	0
ASV702	d__Bacteria; p__Bacteroidota; c__Bacteroidia; o__Bacteroidales; f__Prevotellaceae; g__Prevotella; s__uncultured rumen bacterium	0	0	0	0	0	0	26	18	0	0	0	43	0	0	0	0	0	10	0	0	0	13	0	0
ASV703	d__Bacteria; p__Firmicutes; c__Clostridia; o__Clostridia UCG-014; f__norank; g__norank; s__uncultured bacterium	0	0	0	0	0	0	0	0	39	0	0	0	0	0	0	0	63	0	0	0	0	0	0	0
ASV704	d__Bacteria; p__Firmicutes; c__Clostridia; o__Oscillospirales; f__Oscillospiraceae; g__V9D2013 group; s__uncultured rumen bacterium	9	0	0	40	20	0	0	0	0	4	0	0	0	0	0	0	0	0	0	0	12	0	0	0
ASV705	d__Bacteria; p__Firmicutes; c__Clostridia; o__Oscillospirales; f__Ruminococcaceae; g__Ruminococcus; s__uncultured rumen bacterium	7	0	0	12	0	12	0	0	0	6	0	0	0	0	0	0	0	0	0	0	16	6	19	12
ASV706	d__Bacteria; p__Bacteroidota; c__Bacteroidia; o__Bacteroidales; f__Prevotellaceae; g__Prevotella; s__uncultured bacterium	11	0	0	0	0	0	0	18	0	0	0	0	0	0	0	0	0	15	0	0	0	11	43	0
ASV707	d__Bacteria; p__Fibrobacterota; c__Fibrobacteria; o__Fibrobacterales; f__Fibrobacteraceae; g__Fibrobacter	0	0	25	8	0	0	0	0	0	28	34	0	14	0	0	0	0	0	0	0	3	0	0	0
ASV708	d__Bacteria; p__Firmicutes; c__Clostridia; o__Lachnospirales; f__Lachnospiraceae; g__[Eubacterium] ruminantium group	0	0	0	20	0	0	0	0	27	0	0	0	0	0	0	0	0	0	0	0	0	0	0	43
ASV709	d__Bacteria; p__Bacteroidota; c__Bacteroidia; o__Bacteroidales; f__Prevotellaceae; g__Prevotellaceae UCG-001	0	0	0	0	0	0	0	0	0	0	107	0	0	0	0	0	0	0	0	0	0	0	0	0
ASV710	d__Bacteria; p__Firmicutes; c__Clostridia; o__Christensenellales; f__Christensenellaceae; g__Christensenellaceae R-7 group; s__uncultured bacterium	0	0	0	0	0	0	0	0	0	0	0	0	0	0	101	0	0	35	0	0	0	0	0	0
ASV711	d__Bacteria; p__Firmicutes; c__Clostridia; o__Oscillospirales; f__Ruminococcaceae; g__Ruminococcus	0	19	0	0	0	0	0	0	0	0	30	23	0	0	0	0	0	0	0	0	0	0	18	21
ASV712	d__Bacteria; p__Bacteroidota; c__Bacteroidia; o__Bacteroidales; f__Bacteroidales BS11 gut group; g__norank; s__uncultured rumen bacterium	0	0	0	0	0	0	0	0	0	0	27	0	29	0	35	0	0	0	0	0	0	9	13	0
ASV713	d__Bacteria; p__Firmicutes; c__Clostridia; o__Lachnospirales; f__Lachnospiraceae; g__[Ruminococcus] gauvreauii group; s__uncultured bacterium	20	0	0	0	9	0	0	26	0	0	0	0	0	0	0	0	0	20	0	0	19	0	0	0
ASV714	d__Bacteria; p__Bacteroidota; c__Bacteroidia; o__Bacteroidales; f__Prevotellaceae; g__Prevotella; s__uncultured rumen bacterium	4	6	0	17	8	0	32	18	0	0	0	6	0	9	0	0	0	0	0	0	0	0	0	0
ASV715	d__Bacteria; p__Firmicutes; c__Clostridia; o__Oscillospirales; f__Ruminococcaceae; g__Ruminococcus; s__Ruminococcus albus	0	14	0	0	0	0	0	0	0	0	26	23	16	0	0	0	0	0	0	31	0	0	0	0
ASV716	d__Bacteria; p__Bacteroidota; c__Bacteroidia; o__Bacteroidales; f__Prevotellaceae; g__Prevotellaceae UCG-001; s__uncultured rumen bacterium	4	9	5	5	1	0	0	12	0	6	0	20	0	0	3	0	0	0	3	0	9	9	0	10
ASV717	d__Bacteria; p__Firmicutes; c__Clostridia; o__Lachnospirales; f__Lachnospiraceae; g__Lachnospiraceae ND3007 group; s__uncultured bacterium	0	0	11	0	0	0	0	50	0	0	7	0	9	0	0	0	0	0	0	0	0	9	0	0
ASV718	d__Bacteria; p__Bacteroidota; c__Bacteroidia; o__Bacteroidales; f__Muribaculaceae; g__norank; s__uncultured bacterium	0	21	0	0	0	0	0	0	0	0	0	0	38	0	0	0	0	0	0	0	0	16	0	19
ASV719	d__Bacteria; p__Firmicutes; c__Clostridia; o__Oscillospirales; f__Ruminococcaceae; g__UCG-001; s__uncultured bacterium	0	31	0	0	0	0	0	0	0	0	0	0	17	0	0	23	0	0	11	0	0	0	13	0
ASV720	d__Bacteria; p__Firmicutes; c__Clostridia; o__Oscillospirales; f__Oscillospiraceae; g__UCG-002	0	12	0	0	17	0	0	0	0	0	0	0	18	0	0	0	0	26	27	0	0	0	0	0
ASV721	d__Bacteria; p__Bacteroidota; c__Bacteroidia; o__Bacteroidales; f__Prevotellaceae; g__Prevotella; s__uncultured rumen bacterium	0	0	0	0	5	0	0	8	0	0	9	8	4	0	0	0	6	6	10	0	0	15	0	9
ASV722	d__Bacteria; p__Bacteroidota; c__Bacteroidia; o__Bacteroidales; f__Prevotellaceae; g__Prevotella; s__uncultured rumen bacterium	0	0	0	0	0	0	128	0	0	0	0	0	0	0	0	0	0	0	0	0	0	0	0	0
ASV723	d__Bacteria; p__Bacteroidota; c__Bacteroidia; o__Bacteroidales; f__Prevotellaceae; g__Prevotella; s__uncultured rumen bacterium	0	0	0	0	0	0	0	0	0	0	0	31	0	0	0	0	0	30	0	0	0	28	0	0
ASV724	d__Bacteria; p__Bacteroidota; c__Bacteroidia; o__Bacteroidales; f__uncultured; g__norank; s__uncultured rumen bacterium	0	0	0	0	0	0	0	0	0	0	0	0	0	24	14	0	0	36	0	0	19	0	0	0
ASV725	d__Bacteria; p__Actinobacteriota; c__Coriobacteriia; o__Coriobacteriales; f__Atopobiaceae; g__Olsenella	0	0	0	0	0	0	0	0	0	0	0	0	0	0	0	0	0	36	0	19	0	0	36	12
ASV726	d__Bacteria; p__Spirochaetota; c__Spirochaetia; o__Spirochaetales; f__Spirochaetaceae; g__Treponema	43	0	0	0	0	0	0	39	0	0	0	0	0	0	0	0	0	0	0	0	0	0	0	0
ASV727	d__Bacteria; p__Firmicutes; c__Clostridia; o__Oscillospirales; f__Ruminococcaceae; g__Ruminococcus; s__uncultured bacterium	36	0	0	0	0	0	0	50	0	0	0	0	0	0	0	0	0	0	0	0	0	0	0	0
ASV728	d__Bacteria; p__Bacteroidota; c__Bacteroidia; o__Bacteroidales; f__F082; g__norank; s__uncultured bacterium	0	0	57	0	0	0	0	0	0	0	0	0	18	0	0	0	0	0	9	0	0	11	24	0
ASV729	d__Bacteria; p__Bacteroidota; c__Bacteroidia; o__Bacteroidales; f__Prevotellaceae; g__Prevotellaceae NK3B31 group; s__uncultured rumen bacterium	0	21	19	0	0	0	0	0	0	0	0	15	0	0	27	12	0	0	0	0	0	0	0	17
ASV730	d__Bacteria; p__Bacteroidota; c__Bacteroidia; o__Bacteroidales; f__Prevotellaceae; g__Prevotellaceae UCG-001; s__uncultured rumen bacterium	0	0	11	0	0	0	0	0	0	0	10	0	13	0	0	0	0	6	0	0	0	39	0	13
ASV731	d__Bacteria; p__Firmicutes; c__Clostridia; o__Lachnospirales; f__Lachnospiraceae; g__[Eubacterium] ruminantium group	0	0	0	22	26	0	0	0	0	0	0	0	0	0	0	0	0	0	0	0	23	0	0	0
ASV732	d__Bacteria; p__Bacteroidota; c__Bacteroidia; o__Bacteroidales; f__Prevotellaceae; g__Prevotellaceae UCG-001; s__uncultured bacterium	0	0	0	36	0	0	0	0	0	0	0	0	0	49	0	0	0	0	0	0	0	0	0	0
ASV733	d__Bacteria; p__Firmicutes; c__Clostridia; o__Oscillospirales; f__Ruminococcaceae; g__Ruminococcus	0	0	0	0	0	0	0	16	0	0	0	0	0	0	0	0	57	14	0	0	0	0	0	0
ASV734	d__Bacteria; p__Bacteroidota; c__Bacteroidia; o__Bacteroidales; f__Prevotellaceae; g__Prevotellaceae NK3B31 group; s__uncultured rumen bacterium	0	18	0	5	0	0	0	0	0	0	0	0	0	0	24	0	0	0	0	0	0	9	23	18
ASV735	d__Bacteria; p__Firmicutes; c__Clostridia; o__Lachnospirales; f__Lachnospiraceae; g__Lachnospiraceae UCG-008; s__uncultured rumen bacterium	0	9	23	0	0	0	0	18	0	0	0	14	0	0	0	0	0	0	0	0	16	0	25	0
ASV736	d__Bacteria; p__Bacteroidota; c__Bacteroidia; o__Bacteroidales; f__Prevotellaceae; g__Prevotellaceae UCG-001; s__uncultured bacterium	0	0	0	35	0	0	0	0	0	7	0	0	0	0	0	7	0	0	0	0	20	13	0	0
ASV737	d__Bacteria; p__Bacteroidota; c__Bacteroidia; o__Bacteroidales; f__Prevotellaceae; g__Prevotella; s__uncultured bacterium	0	0	0	0	0	0	0	0	0	0	0	0	0	0	0	0	0	0	0	140	0	0	0	0
ASV738	d__Bacteria; p__Bacteroidota; c__Bacteroidia; o__Bacteroidales; f__Prevotellaceae; g__Prevotella; s__uncultured rumen bacterium	0	14	20	0	0	0	0	0	0	0	0	20	0	0	0	7	0	0	0	0	0	12	0	14
ASV739	d__Bacteria; p__Bacteroidota; c__Bacteroidia; o__Bacteroidales; f__Prevotellaceae; g__Prevotella; s__uncultured rumen bacterium	0	18	11	0	9	0	0	0	0	0	0	0	0	0	0	0	0	9	0	0	0	8	30	0
ASV740	d__Bacteria; p__Bacteroidota; c__Bacteroidia; o__Bacteroidales; f__uncultured; g__norank; s__uncultured bacterium	21	0	0	0	0	0	0	15	0	12	0	0	0	0	0	0	0	0	7	0	11	0	0	17
ASV741	d__Bacteria; p__Bacteroidota; c__Bacteroidia; o__Bacteroidales; f__Prevotellaceae; g__Prevotellaceae YAB2003 group; s__uncultured rumen bacterium	0	0	0	0	0	0	0	76	0	0	0	0	0	0	0	0	0	0	0	0	0	0	0	0
ASV742	d__Bacteria; p__Firmicutes; c__Clostridia; o__Oscillospirales; f__Oscillospiraceae; g__NK4A214 group; s__uncultured bacterium	0	0	0	0	0	0	0	0	0	8	0	22	0	0	62	0	0	0	0	0	0	25	0	0
ASV743	d__Bacteria; p__Bacteroidota; c__Bacteroidia; o__Bacteroidales; f__Prevotellaceae; g__Prevotellaceae UCG-001	10	6	0	7	9	12	0	2	0	0	0	0	0	7	0	0	0	15	0	0	0	17	0	6
ASV744	d__Bacteria; p__Firmicutes; c__Bacilli; o__Erysipelotrichales; f__Erysipelatoclostridiaceae; g__Kandleria; s__Kandleria vitulina	7	0	0	0	2	30	0	11	39	0	0	0	0	0	0	0	0	0	0	0	0	0	0	0
ASV745	d__Bacteria; p__Bacteroidota; c__Bacteroidia; o__Bacteroidales; f__Prevotellaceae; g__Prevotella; s__uncultured rumen bacterium	0	17	0	0	0	0	0	0	0	0	0	21	21	0	17	0	0	0	8	0	2	0	0	8
ASV746	d__Bacteria; p__Bacteroidota; c__Bacteroidia; o__Bacteroidales; f__Prevotellaceae; g__Prevotellaceae UCG-003; s__uncultured bacterium	0	0	49	0	0	0	0	0	0	0	0	25	0	0	0	0	0	9	0	0	0	11	0	0
ASV747	d__Bacteria; p__Firmicutes; c__Negativicutes; o__Acidaminococcales; f__Acidaminococcaceae; g__Acidaminococcus; s__Acidaminococcus fermentans DSM 20731	0	0	0	0	2	6	0	0	0	29	0	0	0	42	0	0	0	0	0	0	4	0	0	0
ASV748	d__Bacteria; p__Firmicutes; c__Negativicutes; o__Veillonellales-Selenomonadales; f__Selenomonadaceae; g__Veillonellaceae UCG-001; s__uncultured bacterium	0	0	0	0	0	0	0	0	0	0	43	0	0	0	0	14	0	0	11	11	0	22	0	0
ASV749	d__Bacteria; p__Firmicutes; c__Clostridia; o__Christensenellales; f__Christensenellaceae; g__Christensenellaceae R-7 group; s__uncultured bacterium	0	0	0	0	0	0	0	0	0	0	0	0	0	0	0	0	0	0	0	0	76	0	0	0
ASV750	d__Bacteria; p__Firmicutes; c__Negativicutes; o__Veillonellales-Selenomonadales; f__Veillonellaceae; g__Dialister; s__uncultured bacterium	12	0	0	6	0	35	0	0	35	0	0	0	0	9	0	0	0	0	0	0	0	0	0	0
ASV751	d__Bacteria; p__Bacteroidota; c__Bacteroidia; o__Bacteroidales; f__Prevotellaceae; g__Prevotella; s__uncultured bacterium	0	9	3	4	12	0	0	0	0	9	8	0	0	0	0	0	0	8	0	22	3	2	7	0
ASV752	d__Bacteria; p__Bacteroidota; c__Bacteroidia; o__Bacteroidales; f__Prevotellaceae; g__Prevotella; s__uncultured rumen bacterium	62	0	0	0	0	0	0	15	0	17	0	0	0	0	0	0	0	0	0	0	0	0	0	0
ASV753	d__Bacteria; p__Firmicutes; c__Clostridia; o__Oscillospirales; f__Ruminococcaceae; g__Ruminococcus	29	0	0	0	0	0	0	0	0	0	0	0	0	9	16	0	15	0	0	0	7	15	0	0
ASV754	d__Bacteria; p__Firmicutes; c__Clostridia; o__Oscillospirales; f__Oscillospiraceae; g__UCG-002; s__uncultured bacterium	57	0	0	0	0	0	0	0	0	0	0	0	0	0	0	0	0	0	0	0	21	0	0	0
ASV755	d__Bacteria; p__Firmicutes; c__Clostridia; o__Lachnospirales; f__Lachnospiraceae; g__Acetitomaculum; s__uncultured bacterium	12	0	0	7	0	0	0	8	0	0	0	0	0	0	0	0	0	0	24	0	10	0	38	0
ASV756	d__Bacteria; p__Bacteroidota; c__Bacteroidia; o__Bacteroidales; f__Muribaculaceae; g__norank; s__uncultured rumen bacterium	14	51	0	0	0	0	0	0	0	0	0	0	0	0	0	0	0	0	0	0	0	0	0	17
ASV757	d__Bacteria; p__Firmicutes; c__Clostridia; o__Lachnospirales; f__Lachnospiraceae; g__Lachnoclostridium; s__uncultured rumen bacterium	5	13	45	0	0	0	0	0	0	0	0	0	19	0	0	0	0	0	0	12	0	0	18	0
ASV758	d__Bacteria; p__Firmicutes; c__Clostridia; o__Oscillospirales; f__Oscillospiraceae; g__uncultured; s__uncultured rumen bacterium	0	0	0	0	0	0	0	3	0	0	0	0	0	0	86	0	0	0	0	0	6	0	0	22
ASV759	d__Bacteria; p__Firmicutes; c__Clostridia; o__Lachnospirales; f__Lachnospiraceae; g__Lachnospiraceae NK4A136 group; s__uncultured rumen bacterium	20	0	0	0	17	0	10	0	0	0	0	8	26	0	0	0	0	0	0	0	0	0	0	0
ASV760	d__Bacteria; p__Bacteroidota; c__Bacteroidia; o__Bacteroidales; f__Prevotellaceae; g__Prevotella; s__uncultured rumen bacterium	0	0	0	0	0	0	22	39	0	0	0	41	0	0	0	0	0	0	0	0	0	0	0	0
ASV761	d__Bacteria; p__Bacteroidota; c__Bacteroidia; o__Bacteroidales; f__Prevotellaceae; g__Prevotellaceae UCG-003; s__uncultured rumen bacterium	0	0	11	0	7	0	3	0	0	0	0	0	0	0	0	0	0	19	0	0	11	15	0	13
ASV762	d__Bacteria; p__Bacteroidota; c__Bacteroidia; o__Bacteroidales; f__Prevotellaceae; g__Prevotella; s__uncultured rumen bacterium	0	0	0	14	0	0	0	0	0	0	0	0	0	0	0	0	0	36	0	0	23	0	0	0
ASV763	d__Bacteria; p__Firmicutes; c__Clostridia; o__Christensenellales; f__Christensenellaceae; g__Christensenellaceae R-7 group; s__uncultured bacterium	0	0	0	0	0	0	0	0	0	0	18	12	0	0	15	0	0	12	0	0	6	0	28	0
ASV764	d__Bacteria; p__Bacteroidota; c__Bacteroidia; o__Bacteroidales; f__p-251-o5; g__norank; s__uncultured rumen bacterium	0	30	0	0	0	0	0	0	0	0	0	0	0	0	0	0	0	14	0	0	0	0	0	33
ASV765	d__Bacteria; p__Firmicutes; c__Clostridia; o__Clostridia UCG-014; f__norank; g__norank; s__uncultured rumen bacterium	0	0	0	0	0	0	0	62	0	0	0	0	0	0	0	0	0	0	0	0	0	0	0	0
ASV766	d__Bacteria; p__Firmicutes; c__Clostridia; o__Clostridia UCG-014; f__norank; g__norank; s__uncultured Ruminococcaceae bacterium	51	0	0	0	0	0	0	0	0	0	0	0	0	0	0	0	0	0	0	0	33	0	0	0
ASV767	d__Bacteria; p__Firmicutes; c__Clostridia; o__Lachnospirales; f__Lachnospiraceae; g__[Eubacterium] ruminantium group	40	0	0	0	0	0	22	0	0	0	0	18	0	0	0	0	0	0	0	0	19	0	0	0
ASV768	d__Bacteria; p__Bacteroidota; c__Bacteroidia; o__Bacteroidales; f__Rikenellaceae; g__Rikenellaceae RC9 gut group; s__uncultured bacterium	37	33	0	0	0	15	0	0	0	0	0	0	0	0	0	0	0	0	0	0	0	0	0	0
ASV769	d__Bacteria; p__Desulfobacterota; c__Desulfovibrionia; o__Desulfovibrionales; f__Desulfovibrionaceae; g__Desulfovibrio	0	25	0	0	0	0	0	0	0	0	0	0	0	0	33	0	0	0	0	0	0	0	18	24
ASV770	d__Bacteria; p__Bacteroidota; c__Bacteroidia; o__Bacteroidales; f__Prevotellaceae; g__Prevotellaceae UCG-001; s__uncultured bacterium	0	42	0	0	0	0	0	0	0	0	0	0	0	0	0	0	0	32	0	0	0	0	0	0
ASV771	d__Bacteria; p__Firmicutes; c__Clostridia; o__Oscillospirales; f__[Eubacterium] coprostanoligenes group; g__norank; s__uncultured bacterium	0	0	43	0	0	0	0	0	0	0	0	0	0	0	0	13	0	0	0	0	6	0	40	0
ASV772	d__Bacteria; p__Bacteroidota; c__Bacteroidia; o__Bacteroidales; f__Prevotellaceae; g__Prevotellaceae UCG-001	0	0	0	11	23	0	5	7	0	0	0	5	0	0	0	0	0	9	12	0	2	0	0	11
ASV773	d__Bacteria; p__Spirochaetota; c__Spirochaetia; o__Spirochaetales; f__Spirochaetaceae; g__Treponema; s__uncultured bacterium	0	0	0	0	22	0	33	19	0	0	0	0	8	0	0	0	0	0	0	17	0	0	0	0
ASV774	d__Bacteria; p__Bacteroidota; c__Bacteroidia; o__Bacteroidales; f__Rikenellaceae; g__Rikenellaceae RC9 gut group; s__uncultured rumen bacterium	21	0	0	0	0	0	0	0	0	0	0	0	0	0	14	0	0	16	0	23	22	0	0	0
ASV775	d__Bacteria; p__Bacteroidota; c__Bacteroidia; o__Bacteroidales; f__Rikenellaceae; g__Rikenellaceae RC9 gut group	0	13	0	0	0	0	0	0	10	0	0	0	0	7	0	21	0	0	46	0	0	0	0	0
ASV776	d__Bacteria; p__Bacteroidota; c__Bacteroidia; o__Bacteroidales; f__Prevotellaceae; g__Prevotella; s__uncultured rumen bacterium	0	38	0	0	0	0	0	0	0	0	0	0	0	0	0	42	0	0	0	0	0	0	0	0
ASV777	d__Bacteria; p__Firmicutes; c__Clostridia; o__Oscillospirales; f__[Eubacterium] coprostanoligenes group; g__norank; s__uncultured bacterium	5	4	8	0	0	0	0	10	0	0	0	2	16	0	0	0	0	0	3	0	0	19	14	9
ASV778	d__Bacteria; p__Bacteroidota; c__Bacteroidia; o__Bacteroidales; f__Muribaculaceae; g__norank; s__uncultured bacterium	0	0	0	0	0	37	0	0	24	0	0	0	0	18	0	0	0	0	0	0	0	0	0	0
ASV779	d__Bacteria; p__Bacteroidota; c__Bacteroidia; o__Bacteroidales; f__Muribaculaceae; g__norank; s__uncultured rumen bacterium	0	0	0	0	0	5	11	0	0	0	0	0	0	0	0	0	0	42	0	0	0	0	0	20
ASV780	d__Bacteria; p__Spirochaetota; c__Spirochaetia; o__Spirochaetales; f__Spirochaetaceae; g__Treponema; s__uncultured rumen bacterium	0	0	0	9	10	0	0	24	0	0	0	0	0	15	0	0	0	0	0	0	0	0	0	0
ASV781	d__Bacteria; p__Firmicutes; c__Clostridia; o__Lachnospirales; f__Lachnospiraceae; g__Lachnospiraceae NK3A20 group; s__uncultured bacterium	0	0	0	0	6	0	0	0	0	0	23	0	0	0	17	0	0	0	16	0	7	0	21	12
ASV782	d__Bacteria; p__Fibrobacterota; c__Fibrobacteria; o__Fibrobacterales; f__Fibrobacteraceae; g__Fibrobacter; s__Fibrobacter succinogenes subsp. succinogenes S85	0	0	0	0	0	0	93	0	0	0	0	0	0	0	0	16	0	0	0	0	0	0	0	0
ASV783	d__Bacteria; p__Bacteroidota; c__Bacteroidia; o__Bacteroidales; f__Muribaculaceae; g__norank; s__uncultured bacterium	0	0	0	0	0	0	0	0	0	0	0	0	0	0	0	45	0	0	0	0	32	0	0	0
ASV784	d__Bacteria; p__Firmicutes; c__Clostridia; o__Lachnospirales; f__Lachnospiraceae; g__Lachnospira	29	0	0	0	7	10	0	16	3	6	0	0	0	0	2	0	0	0	0	0	0	0	0	0
ASV785	d__Bacteria; p__Bacteroidota; c__Bacteroidia; o__Bacteroidales; f__uncultured; g__norank; s__uncultured bacterium	5	0	0	0	0	11	0	0	9	8	0	0	0	29	0	0	22	0	0	0	0	0	0	0
ASV786	d__Bacteria; p__WPS-2; c__norank; o__norank; f__norank; g__norank	4	0	7	0	0	0	18	6	0	0	11	0	10	3	0	3	0	0	0	0	0	20	0	0
ASV787	d__Bacteria; p__Bacteroidota; c__Bacteroidia; o__Bacteroidales; f__Prevotellaceae; g__Prevotella; s__uncultured bacterium	14	6	0	0	0	0	18	0	0	0	0	5	0	0	0	0	0	19	7	6	0	16	0	0
ASV788	d__Bacteria; p__Firmicutes; c__Clostridia; o__Oscillospirales; f__Oscillospiraceae; g__Oscillibacter	2	2	5	6	11	0	0	0	0	0	19	16	0	0	0	0	0	0	0	7	4	5	0	3
ASV789	d__Bacteria; p__Cyanobacteria; c__Vampirivibrionia; o__Gastranaerophilales; f__norank; g__norank; s__uncultured bacterium	12	0	21	0	13	0	0	0	0	0	0	0	0	0	0	0	0	0	3	0	39	0	0	0
ASV790	d__Bacteria; p__Bacteroidota; c__Bacteroidia; o__Bacteroidales; f__Prevotellaceae; g__Prevotella; s__uncultured rumen bacterium	0	22	8	8	0	0	0	0	0	0	0	14	0	0	0	11	0	15	0	0	0	3	0	0
ASV791	d__Bacteria; p__Firmicutes; c__Clostridia; o__Clostridia UCG-014; f__norank; g__norank; s__uncultured bacterium	0	0	28	0	0	0	0	0	0	0	0	0	21	0	22	0	0	10	0	0	11	0	0	0
ASV792	d__Bacteria; p__Bacteroidota; c__Bacteroidia; o__Bacteroidales; f__Prevotellaceae; g__Prevotellaceae UCG-001; s__uncultured rumen bacterium	0	0	12	0	0	0	8	0	0	0	0	0	0	0	13	20	0	8	0	0	5	0	4	6
ASV793	d__Bacteria; p__Bacteroidota; c__Bacteroidia; o__Bacteroidales; f__Prevotellaceae; g__Prevotella; s__uncultured bacterium	0	0	26	0	0	0	0	0	0	0	0	0	0	0	0	0	0	21	0	0	0	0	0	38
ASV794	d__Bacteria; p__Bacteroidota; c__Bacteroidia; o__Bacteroidales; f__Prevotellaceae; g__Prevotella; s__uncultured rumen bacterium	0	0	0	0	57	0	0	0	0	0	0	0	0	0	0	0	0	0	0	0	0	0	0	0
ASV795	d__Bacteria; p__Firmicutes; c__Negativicutes; o__Veillonellales-Selenomonadales; f__Selenomonadaceae; g__Anaerovibrio; s__uncultured bacterium	0	0	0	0	0	0	0	0	0	0	30	41	0	0	0	21	0	0	0	0	0	0	0	0
ASV796	d__Bacteria; p__Firmicutes; c__Clostridia; o__Christensenellales; f__Christensenellaceae; g__Christensenellaceae R-7 group; s__uncultured bacterium	5	0	0	0	8	0	0	0	0	0	17	0	17	0	0	0	0	2	0	0	10	6	20	0
ASV797	d__Bacteria; p__Bacteroidota; c__Bacteroidia; o__Bacteroidales; f__Prevotellaceae; g__Prevotellaceae NK3B31 group; s__uncultured bacterium	0	15	0	3	0	0	0	0	0	0	0	0	9	2	5	0	0	9	13	0	7	14	0	7
ASV798	d__Bacteria; p__Bacteroidota; c__Bacteroidia; o__Bacteroidales; f__Rikenellaceae; g__Rikenellaceae RC9 gut group	0	0	0	10	0	0	0	0	0	0	0	0	0	0	72	0	0	0	0	0	0	26	0	0
ASV799	d__Bacteria; p__Firmicutes; c__Clostridia; o__Clostridia UCG-014; f__norank; g__norank; s__uncultured bacterium	0	0	0	0	0	0	0	73	0	0	0	0	0	0	0	0	0	0	0	0	0	0	0	0
ASV800	d__Bacteria; p__Bacteroidota; c__Bacteroidia; o__Bacteroidales; f__Prevotellaceae; g__Prevotellaceae UCG-003; s__uncultured rumen bacterium	0	0	36	0	0	0	0	0	0	0	0	0	0	0	0	0	0	16	0	0	14	21	0	0
ASV801	d__Bacteria; p__Bacteroidota; c__Bacteroidia; o__Bacteroidales; f__Prevotellaceae; g__Prevotella; s__uncultured rumen bacterium	0	0	0	0	0	0	0	0	0	0	0	0	0	0	0	89	0	0	0	0	0	0	0	0
ASV802	d__Bacteria; p__Bacteroidota; c__Bacteroidia; o__Bacteroidales; f__Prevotellaceae; g__Prevotellaceae NK3B31 group; s__uncultured rumen bacterium	0	0	0	0	0	0	0	0	0	0	0	0	0	0	0	0	0	0	0	112	0	0	0	0
ASV803	d__Bacteria; p__Bacteroidota; c__Bacteroidia; o__Bacteroidales; f__Prevotellaceae; g__Prevotella; s__uncultured rumen bacterium	0	0	26	9	0	0	0	0	0	0	0	0	0	0	0	0	0	20	0	0	0	24	0	6
ASV804	d__Bacteria; p__Bacteroidota; c__Bacteroidia; o__Bacteroidales; f__Prevotellaceae; g__Prevotellaceae YAB2003 group; s__uncultured rumen bacterium	0	0	0	22	21	0	0	0	0	39	0	0	0	0	0	0	0	0	0	0	0	0	0	0
ASV805	d__Bacteria; p__Spirochaetota; c__Spirochaetia; o__Spirochaetales; f__Spirochaetaceae; g__Treponema; s__uncultured rumen bacterium	0	0	0	0	0	0	0	57	0	0	0	0	0	0	0	0	0	0	0	0	0	0	0	0
ASV806	d__Bacteria; p__Bacteroidota; c__Bacteroidia; o__Bacteroidales; f__Prevotellaceae; g__Prevotella; s__uncultured rumen bacterium	0	0	0	0	0	0	0	0	0	0	38	50	0	0	0	0	0	0	0	0	0	0	0	0
ASV807	d__Bacteria; p__Bacteroidota; c__Bacteroidia; o__Bacteroidales; f__Rikenellaceae; g__Rikenellaceae RC9 gut group; s__uncultured rumen bacterium	0	0	0	0	0	0	0	0	0	0	0	15	0	0	0	7	0	0	0	0	0	29	27	22
ASV808	d__Bacteria; p__Firmicutes; c__Clostridia; o__Lachnospirales; f__Lachnospiraceae; g__Butyrivibrio; s__Butyrivibrio hungatei	0	0	0	0	0	0	0	0	0	0	0	0	0	0	0	0	0	0	0	0	0	74	0	0
ASV809	d__Bacteria; p__Bacteroidota; c__Bacteroidia; o__Bacteroidales; f__Rikenellaceae; g__Rikenellaceae RC9 gut group	19	0	0	0	0	0	0	0	0	0	0	0	0	0	19	18	0	9	0	0	17	0	12	0
ASV810	d__Bacteria; p__Firmicutes; c__Clostridia; o__Clostridia UCG-014; f__norank; g__norank; s__uncultured bacterium	0	0	0	0	0	0	0	0	0	0	20	0	21	0	0	0	0	7	38	0	0	0	0	0
ASV811	d__Bacteria; p__Firmicutes; c__Clostridia; o__Peptostreptococcales-Tissierellales; f__Anaerovoracaceae; g__Anaerovorax; s__uncultured rumen bacterium	0	0	0	0	0	0	0	0	0	0	0	0	0	0	33	0	0	0	27	0	14	10	11	13
ASV812	d__Bacteria; p__Bacteroidota; c__Bacteroidia; o__Bacteroidales; f__Prevotellaceae; g__Prevotella; s__uncultured bacterium	0	41	0	0	0	0	0	0	0	0	0	0	26	0	0	0	0	0	19	0	0	0	0	0
ASV813	d__Bacteria; p__Bacteroidota; c__Bacteroidia; o__Bacteroidales; f__Prevotellaceae; g__Prevotella; s__uncultured rumen bacterium	0	29	0	0	0	0	0	0	0	0	0	0	0	0	0	0	0	0	0	0	0	0	0	51
ASV814	d__Bacteria; p__Bacteroidota; c__Bacteroidia; o__Bacteroidales; f__Prevotellaceae; g__Prevotellaceae UCG-001; s__uncultured rumen bacterium	0	0	15	0	0	0	0	0	0	0	18	17	0	0	30	8	0	0	4	0	0	0	13	0
ASV815	d__Bacteria; p__Firmicutes; c__Clostridia; o__Lachnospirales; f__Lachnospiraceae; g__Lachnospiraceae ND3007 group; s__uncultured Lachnospiraceae bacterium	0	0	53	0	0	0	0	0	0	0	0	0	0	0	0	0	0	0	0	0	0	38	0	0
ASV816	d__Bacteria; p__Firmicutes; c__Clostridia; o__Oscillospirales; f__Hungateiclostridiaceae; g__Ruminiclostridium; s__uncultured bacterium	0	0	0	0	0	0	0	0	0	0	16	10	18	0	33	0	0	0	0	17	0	5	0	0
ASV817	d__Bacteria; p__Bacteroidota; c__Bacteroidia; o__Bacteroidales; f__Prevotellaceae; g__Prevotella; s__uncultured rumen bacterium	28	0	0	25	0	0	0	0	0	0	0	0	0	0	0	0	0	0	0	0	15	0	0	0
ASV818	d__Bacteria; p__Bacteroidota; c__Bacteroidia; o__Bacteroidales; f__Prevotellaceae; g__Prevotella	23	0	0	0	15	0	0	34	0	0	0	0	0	0	0	0	0	0	0	0	0	0	0	0
ASV819	d__Bacteria; p__Spirochaetota; c__Spirochaetia; o__Spirochaetales; f__Spirochaetaceae; g__Treponema; s__uncultured Treponema sp.	0	12	0	19	0	0	11	0	0	2	0	0	6	0	0	0	0	13	9	0	0	11	0	0
ASV820	d__Bacteria; p__Bacteroidota; c__Bacteroidia; o__Bacteroidales; f__Prevotellaceae; g__Prevotella; s__uncultured bacterium	0	0	0	0	14	0	0	30	0	0	0	0	0	0	0	0	0	0	0	0	0	0	0	25
ASV821	d__Bacteria; p__Firmicutes; c__Clostridia; o__Oscillospirales; f__Ruminococcaceae; g__Ruminococcus; s__uncultured bacterium	0	0	0	0	0	0	0	0	0	0	0	0	0	0	0	0	0	0	32	41	28	0	0	0
ASV822	d__Bacteria; p__Bacteroidota; c__Bacteroidia; o__Bacteroidales; f__Prevotellaceae; g__Prevotellaceae UCG-001; s__uncultured bacterium	20	0	0	0	0	0	43	0	0	0	0	0	0	0	0	0	0	0	34	0	0	0	0	0
ASV823	d__Bacteria; p__Bacteroidota; c__Bacteroidia; o__Bacteroidales; f__Prevotellaceae; g__Prevotellaceae UCG-003; s__uncultured bacterium	0	15	25	7	0	0	14	0	0	0	0	12	0	0	0	0	0	0	15	0	0	0	0	0
ASV824	d__Bacteria; p__Proteobacteria; c__Alphaproteobacteria; o__Rhodospirillales; f__uncultured; g__norank; s__uncultured bacterium	0	0	0	38	0	0	0	12	0	0	0	0	14	0	0	0	0	0	0	0	0	0	0	9
ASV825	d__Bacteria; p__Firmicutes; c__Clostridia; o__Lachnospirales; f__Lachnospiraceae; g__Lachnospiraceae ND3007 group	0	0	0	0	0	0	0	0	0	0	0	0	0	0	0	0	0	21	0	75	0	0	0	0
ASV826	d__Bacteria; p__Bacteroidota; c__Bacteroidia; o__Bacteroidales; f__Prevotellaceae; g__Prevotella; s__uncultured bacterium	0	0	11	22	0	0	21	0	0	0	0	0	0	0	0	0	0	0	0	0	0	36	0	0
ASV827	d__Bacteria; p__Firmicutes; c__Clostridia; o__Lachnospirales; f__Lachnospiraceae; g__[Eubacterium] ruminantium group; s__uncultured rumen bacterium	0	0	0	10	7	0	0	9	0	0	0	0	0	0	0	0	0	0	0	0	22	24	0	0
ASV828	d__Bacteria; p__Bacteroidota; c__Bacteroidia; o__Bacteroidales; f__F082; g__norank; s__uncultured rumen bacterium	0	0	0	0	0	0	0	0	0	0	0	0	15	0	17	10	0	3	9	0	4	0	15	17
ASV829	d__Bacteria; p__Bacteroidota; c__Bacteroidia; o__Bacteroidales; f__Prevotellaceae; g__Prevotella; s__uncultured rumen bacterium	0	0	0	0	0	0	0	0	0	0	0	0	0	0	0	0	0	0	0	0	0	0	117	0
ASV830	d__Bacteria; p__Bacteroidota; c__Bacteroidia; o__Bacteroidales; f__Muribaculaceae; g__norank; s__uncultured bacterium	0	0	0	0	0	0	0	0	0	0	0	0	23	0	0	0	0	0	0	0	26	14	23	0
ASV831	d__Bacteria; p__Bacteroidota; c__Bacteroidia; o__Bacteroidales; f__Prevotellaceae; g__Prevotella; s__uncultured rumen bacterium	0	0	101	0	0	0	0	0	0	0	0	0	0	0	0	0	0	0	0	0	0	0	0	0
ASV832	d__Bacteria; p__Bacteroidota; c__Bacteroidia; o__Bacteroidales; f__Prevotellaceae; g__Prevotella; s__uncultured rumen bacterium	0	0	0	63	0	0	0	0	0	0	0	0	0	0	0	0	0	0	0	0	4	0	0	0
ASV833	d__Bacteria; p__Bacteroidota; c__Bacteroidia; o__Bacteroidales; f__Prevotellaceae; g__Prevotella_7	0	0	0	0	0	81	0	0	0	0	0	0	0	0	0	0	0	0	0	0	0	0	0	0
ASV834	d__Bacteria; p__Bacteroidota; c__Bacteroidia; o__Bacteroidales; f__Prevotellaceae; g__Prevotella; s__uncultured rumen bacterium	12	0	0	0	0	6	38	0	0	0	0	0	0	10	0	0	0	0	0	0	17	0	0	0
ASV835	d__Bacteria; p__Bacteroidota; c__Bacteroidia; o__Bacteroidales; f__Prevotellaceae; g__Prevotellaceae UCG-003; s__uncultured rumen bacterium	21	0	0	0	0	0	0	25	0	0	0	0	0	15	0	0	9	0	0	0	0	0	0	0
ASV836	d__Bacteria; p__Firmicutes; c__Clostridia; o__Oscillospirales; f__Ruminococcaceae; g__Ruminococcus; s__uncultured rumen bacterium	19	0	0	0	0	0	0	0	0	0	25	0	21	0	0	0	0	0	0	0	17	0	0	0
ASV837	d__Bacteria; p__Bacteroidota; c__Bacteroidia; o__Bacteroidales; f__F082; g__norank; s__uncultured rumen bacterium	10	0	16	7	0	0	9	0	14	0	0	0	0	0	0	7	0	0	15	0	0	8	0	0
ASV838	d__Bacteria; p__Cyanobacteria; c__Vampirivibrionia; o__Gastranaerophilales; f__norank; g__norank; s__uncultured bacterium	6	0	0	38	0	0	0	0	0	0	0	0	0	0	0	0	0	0	0	0	17	0	0	0
ASV839	d__Bacteria; p__Bacteroidota; c__Bacteroidia; o__Bacteroidales; f__uncultured; g__norank; s__uncultured bacterium	0	0	29	0	0	0	0	0	0	0	22	0	0	0	0	5	0	8	0	0	0	4	18	0
ASV840	d__Bacteria; p__Bacteroidota; c__Bacteroidia; o__Bacteroidales; f__Prevotellaceae; g__Prevotella	0	0	0	3	0	0	0	33	0	0	0	0	0	0	0	0	0	0	0	0	27	0	0	0
ASV841	d__Bacteria; p__Bacteroidota; c__Bacteroidia; o__Bacteroidales; f__Prevotellaceae; g__Prevotella; s__uncultured bacterium	0	0	0	0	0	0	0	0	0	0	0	9	0	0	0	18	0	28	9	0	0	0	23	0
ASV842	d__Bacteria; p__Firmicutes; c__Clostridia; o__Lachnospirales; f__Lachnospiraceae; g__Lachnospiraceae NK3A20 group; s__uncultured rumen bacterium	55	0	0	0	0	0	0	0	0	0	0	0	0	0	0	0	0	0	0	0	0	0	24	0
ASV843	d__Bacteria; p__Bacteroidota; c__Bacteroidia; o__Bacteroidales; f__Prevotellaceae; g__Prevotellaceae UCG-003; s__uncultured rumen bacterium	0	9	31	0	7	0	0	0	0	0	0	0	0	0	0	0	0	0	0	0	10	0	18	0
ASV844	d__Bacteria; p__Bacteroidota; c__Bacteroidia; o__Bacteroidales; f__Prevotellaceae; g__Prevotellaceae UCG-001; s__uncultured rumen bacterium	0	0	37	0	0	0	0	0	0	0	0	12	23	0	0	0	0	0	0	0	0	0	0	13
ASV845	d__Bacteria; p__Bacteroidota; c__Bacteroidia; o__Bacteroidales; f__Prevotellaceae; g__Prevotellaceae UCG-003; s__uncultured bacterium	0	0	10	0	0	0	0	0	0	0	0	0	9	0	19	24	0	0	0	0	4	10	11	0
ASV846	d__Bacteria; p__Bacteroidota; c__Bacteroidia; o__Bacteroidales; f__Muribaculaceae; g__norank; s__uncultured rumen bacterium	0	0	0	0	10	0	0	0	0	0	0	0	10	0	0	0	0	0	0	0	12	8	34	0
ASV847	d__Bacteria; p__Firmicutes; c__Clostridia; o__Oscillospirales; f__[Eubacterium] coprostanoligenes group; g__norank; s__uncultured rumen bacterium	15	0	26	0	6	0	0	0	0	6	0	0	0	0	0	0	0	0	0	0	13	0	0	0
ASV848	d__Bacteria; p__Bacteroidota; c__Bacteroidia; o__Bacteroidales; f__Bacteroidales RF16 group; g__norank; s__uncultured bacterium	3	0	16	0	6	0	0	0	0	0	0	0	15	0	0	6	0	12	4	0	11	0	8	0
ASV849	d__Bacteria; p__Bacteroidota; c__Bacteroidia; o__Bacteroidales; f__Prevotellaceae; g__Prevotella; s__uncultured bacterium	0	13	0	0	0	0	0	0	0	0	0	0	0	0	0	21	0	0	0	0	16	0	0	18
ASV850	d__Bacteria; p__Firmicutes; c__Clostridia; o__Oscillospirales; f__Ruminococcaceae; g__Ruminococcus; s__uncultured bacterium	0	0	0	37	0	4	0	0	0	0	0	0	0	0	0	0	0	0	0	0	0	0	0	18
ASV851	d__Bacteria; p__Bacteroidota; c__Bacteroidia; o__Bacteroidales; f__Prevotellaceae; g__Alloprevotella	0	0	0	3	10	0	0	0	0	0	0	0	0	2	0	0	0	0	0	0	33	0	0	0
ASV852	d__Bacteria; p__Firmicutes; c__Clostridia; o__Lachnospirales; f__Lachnospiraceae; g__Oribacterium; s__uncultured bacterium	0	0	0	0	4	4	0	0	0	0	16	10	0	2	23	0	6	9	0	0	0	0	15	0
ASV853	d__Bacteria; p__Bacteroidota; c__Bacteroidia; o__Bacteroidales; f__Prevotellaceae; g__Prevotella; s__uncultured rumen bacterium	0	0	0	0	0	0	0	0	0	0	0	0	0	0	0	0	66	0	0	0	0	0	0	0
ASV854	d__Bacteria; p__Firmicutes; c__Negativicutes; o__Veillonellales-Selenomonadales; f__Veillonellaceae; g__Allisonella; s__uncultured bacterium	24	0	0	0	12	23	0	0	0	0	0	0	0	10	0	0	0	0	0	0	0	0	0	0
ASV855	d__Bacteria; p__Firmicutes; c__Clostridia; o__Lachnospirales; f__Lachnospiraceae; g__Lachnospiraceae AC2044 group; s__uncultured bacterium	14	0	0	0	0	0	0	0	0	0	0	0	21	0	21	14	0	0	0	0	0	13	0	0
ASV856	d__Bacteria; p__Firmicutes; c__Clostridia; o__Christensenellales; f__Christensenellaceae; g__uncultured; s__uncultured bacterium	6	4	9	0	0	0	0	0	0	0	0	5	6	0	16	0	0	0	0	0	10	5	6	9
ASV857	d__Bacteria; p__Fibrobacterota; c__Fibrobacteria; o__Fibrobacterales; f__Fibrobacteraceae; g__Fibrobacter	0	0	30	0	0	0	37	0	0	0	0	0	15	0	0	0	0	0	0	0	0	0	0	0
ASV858	d__Bacteria; p__Firmicutes; c__Negativicutes; o__Acidaminococcales; f__Acidaminococcaceae; g__Succiniclasticum	0	0	0	0	0	0	0	0	0	0	0	0	0	0	0	0	0	0	0	0	68	0	0	0
ASV859	d__Bacteria; p__Proteobacteria; c__Alphaproteobacteria; o__Rhodospirillales; f__uncultured; g__norank; s__uncultured bacterium	6	0	0	0	0	0	0	0	0	7	0	0	0	0	0	0	0	0	40	0	0	0	0	23
ASV860	d__Bacteria; p__Bacteroidota; c__Bacteroidia; o__Bacteroidales; f__uncultured; g__norank; s__uncultured rumen bacterium	0	0	0	0	0	0	0	66	0	0	0	0	0	0	0	0	0	0	0	0	0	0	0	0
ASV861	d__Bacteria; p__Bacteroidota; c__Bacteroidia; o__Bacteroidales; f__Muribaculaceae; g__norank; s__uncultured rumen bacterium	0	0	0	0	0	0	0	0	0	0	46	0	0	0	0	0	0	0	0	0	0	38	0	0
ASV862	d__Bacteria; p__Firmicutes; c__Clostridia; o__Lachnospirales; f__Lachnospiraceae; g__Lachnoclostridium	5	0	0	10	10	0	0	5	13	0	0	0	0	0	0	7	11	0	0	0	4	3	0	0
ASV863	d__Bacteria; p__Bacteroidota; c__Bacteroidia; o__Bacteroidales; f__Prevotellaceae; g__Prevotella; s__uncultured rumen bacterium	0	15	0	0	0	0	0	0	0	0	0	0	0	0	20	0	0	16	0	0	0	26	0	0
ASV864	d__Bacteria; p__Bacteroidota; c__Bacteroidia; o__Bacteroidales; f__Bacteroidales BS11 gut group; g__norank; s__uncultured rumen bacterium	0	0	43	0	0	0	0	0	0	0	0	0	0	0	0	25	0	0	0	0	0	12	0	0
ASV865	d__Bacteria; p__Bacteroidota; c__Bacteroidia; o__Bacteroidales; f__Muribaculaceae; g__norank; s__uncultured rumen bacterium	0	0	26	0	16	0	0	0	0	0	0	32	0	0	0	0	0	0	0	0	0	0	0	0
ASV866	d__Bacteria; p__Spirochaetota; c__Spirochaetia; o__Spirochaetales; f__Spirochaetaceae; g__Treponema	0	0	0	0	0	0	0	0	0	0	0	25	0	0	0	0	0	22	30	0	0	0	0	0
ASV867	d__Bacteria; p__Bacteroidota; c__Bacteroidia; o__Bacteroidales; f__Muribaculaceae; g__norank; s__uncultured rumen bacterium	0	0	0	0	0	0	0	0	0	0	0	0	0	0	9	22	0	11	0	0	0	23	18	0
ASV868	d__Bacteria; p__Bacteroidota; c__Bacteroidia; o__Bacteroidales; f__Rikenellaceae; g__Rikenellaceae RC9 gut group; s__uncultured bacterium	0	0	0	0	0	0	0	0	0	0	0	0	0	0	0	76	0	0	0	0	0	0	0	0
ASV869	d__Bacteria; p__Firmicutes; c__Clostridia; o__Lachnospirales; f__Lachnospiraceae; g__Lachnospiraceae UCG-006; s__uncultured bacterium	5	0	0	9	0	0	0	0	0	0	10	5	4	0	21	0	0	7	0	0	5	0	19	0
ASV870	d__Bacteria; p__Bacteroidota; c__Bacteroidia; o__Bacteroidales; f__Muribaculaceae; g__norank; s__uncultured rumen bacterium	0	15	0	0	0	0	0	0	0	0	22	17	0	0	0	6	0	0	0	22	0	0	0	0
ASV871	d__Bacteria; p__Firmicutes; c__Clostridia; o__Lachnospirales; f__Lachnospiraceae; g__Acetitomaculum; s__uncultured bacterium	0	0	0	0	0	0	15	9	18	0	0	0	0	0	33	0	0	0	0	0	12	0	0	0
ASV872	d__Bacteria; p__Firmicutes; c__Clostridia; o__Oscillospirales; f__Hungateiclostridiaceae; g__Saccharofermentans; s__uncultured rumen bacterium	0	0	0	0	0	0	0	0	29	0	0	0	0	0	0	0	53	0	0	0	0	0	0	0
ASV873	d__Bacteria; p__Firmicutes; c__Clostridia; o__Oscillospirales; f__Ruminococcaceae; g__UCG-001; s__uncultured rumen bacterium	0	0	0	0	0	0	0	0	0	0	0	0	0	0	41	6	0	0	0	0	0	0	26	14
ASV874	d__Bacteria; p__Firmicutes; c__Negativicutes; o__Veillonellales-Selenomonadales; f__Selenomonadaceae; g__Anaerovibrio	0	74	0	0	0	0	0	0	0	0	0	0	0	0	0	0	0	0	0	0	0	0	0	0
ASV875	d__Bacteria; p__Bacteroidota; c__Bacteroidia; o__Bacteroidales; f__Prevotellaceae; g__Prevotella; s__uncultured rumen bacterium	0	0	0	0	0	0	0	0	0	0	0	0	0	0	0	0	0	0	0	0	0	59	0	0
ASV876	d__Bacteria; p__Firmicutes; c__Clostridia; o__Lachnospirales; f__Lachnospiraceae; g__uncultured; s__uncultured rumen bacterium	18	0	0	0	0	0	0	0	0	0	0	22	10	0	0	0	0	0	0	0	0	0	0	18
ASV877	d__Bacteria; p__Bacteroidota; c__Bacteroidia; o__Bacteroidales; f__Prevotellaceae; g__Prevotellaceae UCG-001; s__uncultured rumen bacterium	5	30	0	0	0	0	0	0	0	0	0	0	16	0	28	0	0	0	0	0	0	0	0	0
ASV878	d__Bacteria; p__Firmicutes; c__Clostridia; o__Lachnospirales; f__Lachnospiraceae; g__Lachnospiraceae NK4A136 group; s__uncultured bacterium	20	0	0	5	16	8	0	0	0	0	0	0	5	0	0	0	0	0	0	0	4	4	0	0
ASV879	d__Bacteria; p__Bacteroidota; c__Bacteroidia; o__Bacteroidales; f__F082; g__norank; s__uncultured rumen bacterium	0	5	13	0	0	0	0	0	0	0	9	0	19	0	0	0	0	7	0	0	0	8	0	10
ASV880	d__Bacteria; p__Firmicutes; c__Clostridia; o__Oscillospirales; f__Ruminococcaceae; g__Ruminococcus; s__uncultured rumen bacterium	0	0	24	0	0	0	0	0	0	0	0	0	0	0	80	0	0	0	0	0	0	0	0	0
ASV881	d__Bacteria; p__Firmicutes; c__Clostridia; o__Oscillospirales; f__Oscillospiraceae; g__NK4A214 group; s__uncultured rumen bacterium	0	0	65	0	0	0	0	0	0	0	0	0	0	0	0	0	0	0	0	0	0	6	0	0
ASV882	d__Bacteria; p__Bacteroidota; c__Bacteroidia; o__Bacteroidales; f__Prevotellaceae; g__Prevotella; s__uncultured rumen bacterium	0	0	20	0	0	0	0	0	0	0	0	0	13	0	0	12	0	11	0	25	0	0	0	0
ASV883	d__Bacteria; p__Firmicutes; c__Clostridia; o__Lachnospirales; f__Lachnospiraceae; g__Lachnospiraceae NK4A136 group; s__uncultured bacterium	10	0	0	0	9	0	6	0	0	0	24	0	9	0	0	3	0	8	0	0	0	9	0	0
ASV884	d__Bacteria; p__Firmicutes; c__Clostridia; o__Lachnospirales; f__Lachnospiraceae; g__Lachnospiraceae AC2044 group; s__uncultured bacterium	22	0	10	0	0	0	0	0	0	0	0	6	14	0	0	0	0	0	0	0	14	0	0	0
ASV885	d__Bacteria; p__Firmicutes; c__Clostridia; o__Lachnospirales; f__Lachnospiraceae	10	2	9	0	7	0	0	0	0	0	0	0	4	0	0	5	0	0	9	0	5	0	0	10
ASV886	d__Bacteria; p__Bacteroidota; c__Bacteroidia; o__Bacteroidales; f__Prevotellaceae; g__Prevotella; s__uncultured rumen bacterium	0	31	14	0	0	0	0	0	0	0	0	0	0	0	13	0	0	0	0	0	0	0	33	0
ASV887	d__Bacteria; p__Bacteroidota; c__Bacteroidia; o__Bacteroidales; f__Prevotellaceae; g__Prevotellaceae UCG-001; s__uncultured bacterium	0	0	0	10	0	0	0	0	0	0	0	0	18	0	0	0	0	0	0	31	0	10	0	10
ASV888	d__Bacteria; p__Firmicutes; c__Clostridia; o__Oscillospirales; f__[Eubacterium] coprostanoligenes group; g__norank; s__uncultured rumen bacterium	0	0	0	0	0	9	0	43	12	0	0	0	0	0	0	0	0	0	0	0	0	0	0	0
ASV889	d__Bacteria; p__Firmicutes; c__Clostridia; o__Clostridia UCG-014; f__norank; g__norank; s__uncultured bacterium	0	0	0	0	0	0	0	0	0	0	0	0	0	0	0	71	0	0	0	0	0	0	0	0
ASV890	d__Bacteria; p__Firmicutes; c__Clostridia; o__Lachnospirales; f__Defluviitaleaceae; g__Defluviitaleaceae UCG-011; s__uncultured rumen bacterium	0	7	12	0	0	0	0	0	0	0	0	0	7	0	0	0	0	8	0	12	0	8	16	0
ASV891	d__Bacteria; p__Synergistota; c__Synergistia; o__Synergistales; f__Synergistaceae; g__Pyramidobacter; s__uncultured rumen bacterium	0	0	25	0	0	0	0	0	0	0	10	2	10	0	0	0	0	0	6	0	11	0	0	11
ASV892	d__Bacteria; p__Proteobacteria; c__Alphaproteobacteria; o__Rickettsiales; f__uncultured; g__norank; s__uncultured rumen bacterium	0	0	0	34	3	0	0	0	0	0	0	0	10	0	29	0	0	0	0	0	0	0	0	0
ASV893	d__Bacteria; p__Desulfobacterota; c__Desulfovibrionia; o__Desulfovibrionales; f__Desulfovibrionaceae; g__Desulfovibrio; s__uncultured bacterium	0	0	0	0	12	0	11	8	0	0	0	0	0	0	0	0	0	0	0	0	20	0	0	14
ASV894	d__Bacteria; p__Firmicutes; c__Clostridia; o__Lachnospirales; f__Lachnospiraceae; g__[Eubacterium] ruminantium group; s__uncultured bacterium	0	0	0	0	0	0	0	0	0	0	0	0	27	0	0	0	0	0	0	0	0	42	0	0
ASV895	d__Bacteria; p__Firmicutes; c__Clostridia; o__Lachnospirales; f__Lachnospiraceae; g__Butyrivibrio; s__uncultured rumen bacterium	0	0	0	0	0	0	0	0	0	0	0	0	0	0	60	31	0	0	0	0	0	0	0	0
ASV896	d__Bacteria; p__Firmicutes; c__Clostridia; o__Oscillospirales; f__Ruminococcaceae; g__Ruminococcus; s__uncultured bacterium	23	0	0	6	0	0	0	20	0	0	0	0	0	0	0	0	0	16	0	0	0	0	0	0
ASV897	d__Bacteria; p__Firmicutes; c__Clostridia; o__Lachnospirales; f__Lachnospiraceae	0	24	0	0	0	0	0	0	0	0	12	6	17	0	6	0	0	0	9	0	0	0	0	0
ASV898	d__Bacteria; p__Bacteroidota; c__Bacteroidia; o__Bacteroidales; f__Rikenellaceae; g__Rikenellaceae RC9 gut group; s__uncultured bacterium	0	16	34	0	0	0	0	0	0	0	0	0	0	0	0	0	0	0	18	20	0	0	0	0
ASV899	d__Bacteria; p__Bacteroidota; c__Bacteroidia; o__Bacteroidales; f__Rikenellaceae; g__Rikenellaceae RC9 gut group; s__uncultured bacterium	0	0	37	0	0	0	0	0	0	0	0	0	0	0	0	0	0	0	0	0	0	0	35	4
ASV900	d__Bacteria; p__Bacteroidota; c__Bacteroidia; o__Bacteroidales; f__Muribaculaceae; g__norank; s__uncultured rumen bacterium	0	0	0	37	0	0	0	0	0	0	0	0	0	0	0	0	0	0	32	0	0	0	0	0
ASV901	d__Bacteria; p__Spirochaetota; c__Spirochaetia; o__Spirochaetales; f__Spirochaetaceae; g__Treponema; s__uncultured bacterium	0	0	0	0	0	19	0	0	29	0	0	0	0	20	0	0	0	0	0	0	0	0	0	0
ASV902	d__Bacteria; p__Bacteroidota; c__Bacteroidia; o__Bacteroidales; f__Prevotellaceae; g__Prevotella; s__uncultured bacterium	0	0	0	0	0	0	0	0	0	0	0	0	0	0	0	10	0	0	22	18	17	0	10	0
ASV903	d__Bacteria; p__Spirochaetota; c__Spirochaetia; o__Spirochaetales; f__Spirochaetaceae; g__Treponema; s__uncultured bacterium	2	0	0	0	0	0	17	10	0	0	0	0	8	0	0	9	0	3	0	0	0	12	0	4
ASV904	d__Bacteria; p__Firmicutes; c__Clostridia; o__Oscillospirales; f__Oscillospiraceae; g__NK4A214 group; s__uncultured rumen bacterium	0	6	17	0	0	0	0	0	0	0	0	8	0	0	37	0	0	10	0	0	0	0	0	0
ASV905	d__Bacteria; p__Firmicutes; c__Clostridia; o__Lachnospirales; f__Lachnospiraceae; g__Anaerosporobacter; s__uncultured bacterium	0	0	24	0	0	0	0	55	0	0	0	0	0	0	0	0	0	0	0	0	0	0	0	0
ASV906	d__Bacteria; p__Firmicutes; c__Clostridia; o__Lachnospirales; f__Lachnospiraceae; g__Lachnospiraceae XPB1014 group; s__uncultured bacterium	0	0	28	0	0	0	0	0	0	0	0	0	0	0	23	13	0	0	0	0	0	0	22	0
ASV907	d__Bacteria; p__Firmicutes; c__Clostridia; o__Clostridia UCG-014; f__norank; g__norank; s__uncultured bacterium	0	0	0	0	13	0	0	0	0	0	0	0	0	0	0	0	0	0	0	0	37	0	0	0
ASV908	Unclassified	0	13	0	0	0	0	0	0	0	0	12	0	35	0	0	0	0	0	0	0	0	0	0	7
ASV909	d__Bacteria; p__Firmicutes; c__Clostridia; o__Oscillospirales; f__[Eubacterium] coprostanoligenes group; g__norank; s__uncultured bacterium	0	0	0	0	16	8	0	0	0	0	0	0	0	5	0	0	0	0	0	0	0	0	42	0
ASV910	d__Bacteria; p__Firmicutes; c__Clostridia; o__Lachnospirales; f__Lachnospiraceae; g__[Eubacterium] ruminantium group; s__Eubacterium ruminantium	0	0	0	0	0	0	0	0	0	0	0	20	0	0	36	0	0	0	0	0	0	23	0	0
ASV911	Unclassified	0	0	0	0	0	0	0	0	0	0	0	0	11	0	0	29	0	0	0	0	0	0	0	20
ASV912	d__Bacteria; p__Firmicutes; c__Clostridia; o__Oscillospirales; f__UCG-010; g__norank; s__uncultured rumen bacterium	0	13	0	0	0	0	0	0	0	0	15	10	18	0	0	9	0	0	0	0	0	3	0	0
ASV913	d__Bacteria; p__Bacteroidota; c__Bacteroidia; o__Bacteroidales; f__Muribaculaceae; g__norank; s__uncultured rumen bacterium	0	7	6	0	0	0	0	0	0	0	0	10	10	0	0	3	0	0	0	18	14	0	0	2
ASV914	d__Bacteria; p__Bacteroidota; c__Bacteroidia; o__Bacteroidales; f__Prevotellaceae; g__Prevotella; s__uncultured rumen bacterium	0	0	16	0	0	0	0	0	0	5	0	0	0	0	0	0	0	12	0	0	15	11	0	0
ASV915	d__Bacteria; p__Firmicutes; c__Bacilli; o__Erysipelotrichales; f__Erysipelotrichaceae; g__[Anaerorhabdus] furcosa group; s__uncultured bacterium	0	0	2	0	2	0	0	0	0	0	10	10	11	0	16	0	0	0	0	8	0	0	16	7
ASV916	d__Bacteria; p__Bacteroidota; c__Bacteroidia; o__Bacteroidales; f__Prevotellaceae; g__Prevotella; s__uncultured rumen bacterium	0	0	0	0	0	0	0	0	0	0	0	0	0	0	0	0	0	0	0	0	0	0	0	65
ASV917	d__Bacteria; p__Cyanobacteria; c__Vampirivibrionia; o__Gastranaerophilales; f__norank; g__norank; s__uncultured rumen bacterium	18	0	0	0	13	0	5	0	0	0	0	0	0	0	0	0	0	0	0	0	28	0	0	0
ASV918	d__Bacteria; p__Bacteroidota; c__Bacteroidia; o__Bacteroidales; f__Prevotellaceae; g__Prevotellaceae UCG-003; s__uncultured bacterium	0	22	4	0	0	0	0	0	0	0	0	0	0	0	20	0	0	0	0	0	5	0	0	12
ASV919	d__Bacteria; p__Bacteroidota; c__Bacteroidia; o__Bacteroidales; f__Rikenellaceae; g__Rikenellaceae RC9 gut group; s__uncultured rumen bacterium	0	3	15	0	0	0	0	0	0	0	0	0	15	0	0	11	0	4	0	5	0	5	20	0
ASV920	d__Bacteria; p__Bacteroidota; c__Bacteroidia; o__Bacteroidales; f__F082; g__norank; s__uncultured rumen bacterium	0	0	35	0	0	0	0	0	0	0	0	0	0	0	0	0	0	0	0	0	0	0	49	0
ASV921	d__Bacteria; p__Firmicutes; c__Clostridia; o__Lachnospirales; f__Lachnospiraceae; g__Lachnospiraceae UCG-006; s__uncultured bacterium	0	0	24	0	0	0	0	10	0	0	0	6	0	0	0	0	4	0	12	0	8	0	0	0
ASV922	d__Bacteria; p__Firmicutes; c__Negativicutes; o__Veillonellales-Selenomonadales; f__Selenomonadaceae; g__Anaerovibrio; s__uncultured bacterium	0	0	0	0	15	0	0	0	0	0	0	0	0	0	0	0	0	0	0	70	0	0	0	0
ASV923	d__Bacteria; p__Bacteroidota; c__Bacteroidia; o__Bacteroidales; f__Prevotellaceae; g__Prevotella; s__uncultured rumen bacterium	0	0	0	0	0	7	29	0	0	33	0	0	0	0	0	0	0	0	0	0	0	5	0	0
ASV924	d__Bacteria; p__Fibrobacterota; c__Fibrobacteria; o__Fibrobacterales; f__Fibrobacteraceae; g__Fibrobacter; s__uncultured rumen bacterium	0	0	0	0	0	4	0	25	0	6	0	0	20	5	0	0	0	0	0	0	0	0	0	0
ASV925	d__Bacteria; p__Bacteroidota; c__Bacteroidia; o__Bacteroidales; f__Prevotellaceae; g__Prevotellaceae UCG-003; s__uncultured bacterium	8	0	0	0	0	0	0	18	0	0	0	0	0	0	0	0	0	0	0	0	0	19	21	0
ASV926	d__Bacteria; p__Cyanobacteria; c__Vampirivibrionia; o__Gastranaerophilales; f__norank; g__norank; s__uncultured bacterium	6	0	0	0	10	5	0	8	0	25	0	0	0	14	0	0	0	0	0	0	0	0	0	0
ASV927	d__Bacteria; p__Firmicutes; c__Clostridia; o__Lachnospirales; f__Lachnospiraceae; g__Lachnospiraceae ND3007 group; s__uncultured rumen bacterium	0	58	0	0	0	0	0	0	0	0	0	0	0	0	0	0	0	0	0	0	0	0	0	0
ASV928	d__Bacteria; p__Firmicutes; c__Clostridia; o__Oscillospirales; f__UCG-010; g__norank	0	9	12	0	0	0	0	4	0	0	0	0	0	0	0	0	0	8	0	16	0	0	12	9
ASV929	d__Bacteria; p__Bacteroidota; c__Bacteroidia; o__Bacteroidales; f__Prevotellaceae; g__Prevotellaceae NK3B31 group; s__uncultured rumen bacterium	0	15	0	0	15	0	0	0	0	0	0	0	10	0	31	0	0	0	0	0	0	0	0	0
ASV930	d__Bacteria; p__Bacteroidota; c__Bacteroidia; o__Bacteroidales; f__Prevotellaceae; g__Prevotella; s__uncultured rumen bacterium	0	0	0	0	0	0	0	0	0	0	0	0	12	0	0	14	0	27	0	0	0	0	0	0
ASV931	d__Bacteria; p__Firmicutes; c__Clostridia; o__Lachnospirales; f__Lachnospiraceae; g__Anaerostipes	14	0	0	0	0	0	0	0	0	0	0	0	0	0	0	0	0	0	0	0	24	0	0	8
ASV932	d__Bacteria; p__Bacteroidota; c__Bacteroidia; o__Bacteroidales; f__Rikenellaceae; g__Rikenellaceae RC9 gut group; s__uncultured bacterium	0	6	0	6	20	0	0	0	0	3	0	0	0	4	0	0	0	0	0	7	0	12	0	10
ASV933	d__Bacteria; p__Bacteroidota; c__Bacteroidia; o__Bacteroidales; f__Rikenellaceae; g__Rikenellaceae RC9 gut group	0	0	0	0	0	0	0	0	0	0	0	6	27	0	0	0	0	0	0	0	0	15	0	18
ASV934	d__Bacteria; p__Bacteroidota; c__Bacteroidia; o__Bacteroidales; f__Muribaculaceae; g__norank; s__uncultured bacterium	0	0	0	0	0	0	0	0	0	0	0	0	0	58	0	0	0	0	0	0	0	8	0	0
ASV935	d__Bacteria; p__Bacteroidota; c__Bacteroidia; o__Bacteroidales; f__Prevotellaceae; g__Prevotella; s__uncultured rumen bacterium	25	0	0	0	0	0	0	0	0	0	0	0	0	0	0	0	0	0	25	0	17	0	0	0
ASV936	d__Bacteria; p__Bacteroidota; c__Bacteroidia; o__Bacteroidales; f__Prevotellaceae; g__Prevotella	0	22	14	0	0	0	19	0	0	0	0	12	0	0	0	0	0	0	0	0	0	0	0	0
ASV937	d__Bacteria; p__Spirochaetota; c__Spirochaetia; o__Spirochaetales; f__Spirochaetaceae; g__Treponema; s__uncultured bacterium	0	0	0	14	0	0	0	0	0	21	0	0	0	8	0	0	0	19	0	0	0	0	0	0
ASV938	d__Bacteria; p__Bacteroidota; c__Bacteroidia; o__Bacteroidales; f__F082; g__norank; s__uncultured rumen bacterium	0	0	0	23	0	0	0	22	0	0	0	0	0	0	0	0	0	0	0	0	0	0	0	0
ASV939	d__Bacteria; p__Bacteroidota; c__Bacteroidia; o__Bacteroidales; f__Muribaculaceae; g__norank; s__uncultured bacterium	0	0	0	0	32	0	0	0	0	21	0	0	0	0	0	0	0	0	0	0	0	0	0	0
ASV940	d__Bacteria; p__Bacteroidota; c__Bacteroidia; o__Bacteroidales; f__Muribaculaceae; g__norank; s__uncultured rumen bacterium	0	0	0	0	25	0	0	0	0	0	0	0	26	0	0	0	0	0	0	0	0	0	0	0
ASV941	d__Bacteria; p__Bacteroidota; c__Bacteroidia; o__Bacteroidales; f__Prevotellaceae; g__Prevotella; s__uncultured bacterium	0	0	0	0	0	0	0	0	0	0	28	0	0	0	0	0	0	24	0	0	0	0	0	8
ASV942	d__Bacteria; p__Firmicutes; c__Clostridia; o__Lachnospirales; f__Lachnospiraceae; g__[Eubacterium] ruminantium group; s__uncultured bacterium	0	0	0	0	0	0	0	0	0	0	44	0	31	0	0	0	0	0	0	0	0	0	0	0
ASV943	d__Bacteria; p__Firmicutes; c__Clostridia; o__Oscillospirales; f__Oscillospiraceae; g__NK4A214 group; s__uncultured bacterium	0	0	0	0	0	0	0	0	0	0	14	23	0	0	0	0	0	32	0	0	0	0	0	0
ASV944	d__Bacteria; p__Bacteroidota; c__Bacteroidia; o__Bacteroidales; f__Prevotellaceae; g__Prevotella; s__uncultured rumen bacterium	0	0	80	0	0	0	0	0	0	0	0	0	0	0	0	0	0	0	0	0	0	0	0	0
ASV945	d__Bacteria; p__Firmicutes; c__Clostridia; o__Oscillospirales; f__Ruminococcaceae; g__CAG-352; s__uncultured rumen bacterium	0	0	0	0	0	0	0	52	0	0	0	0	0	0	0	0	0	0	0	0	0	0	0	0
ASV946	d__Bacteria; p__Bacteroidota; c__Bacteroidia; o__Bacteroidales; f__Prevotellaceae; g__Prevotellaceae UCG-001; s__uncultured bacterium	0	0	0	0	0	0	0	0	0	0	0	0	0	0	0	0	0	0	0	0	0	0	0	58
ASV947	d__Bacteria; p__Firmicutes; c__Clostridia; o__Lachnospirales; f__Lachnospiraceae; g__probable genus 10; s__uncultured bacterium	8	0	0	0	0	12	0	28	17	0	0	0	0	0	0	0	0	0	0	0	0	0	0	0
ASV948	d__Bacteria; p__Proteobacteria; c__Gammaproteobacteria; o__Enterobacterales; f__Succinivibrionaceae	0	6	0	0	5	0	0	0	0	0	8	8	9	0	0	0	0	6	0	5	3	0	0	6
ASV949	d__Bacteria; p__Actinobacteriota; c__Coriobacteriia; o__Coriobacteriales; f__Atopobiaceae; g__Olsenella	0	0	0	25	0	0	0	0	0	0	0	0	0	0	0	0	38	0	0	0	0	0	0	0
ASV950	d__Bacteria; p__Bacteroidota; c__Bacteroidia; o__Bacteroidales; f__Prevotellaceae; g__Prevotella; s__uncultured rumen bacterium	0	0	0	23	0	0	0	0	0	21	0	0	0	0	0	0	0	0	0	0	0	0	0	0
ASV951	d__Bacteria; p__Bacteroidota; c__Bacteroidia; o__Bacteroidales; f__Prevotellaceae; g__Prevotella; s__uncultured rumen bacterium	0	0	0	48	0	0	0	0	0	0	0	0	0	0	0	0	0	0	0	0	0	0	0	0
ASV952	d__Bacteria; p__Firmicutes; c__Clostridia; o__Oscillospirales; f__[Eubacterium] coprostanoligenes group; g__norank; s__uncultured bacterium	0	0	0	0	0	0	0	0	0	0	0	0	0	0	21	0	0	22	0	0	10	12	0	0
ASV953	d__Bacteria; p__Firmicutes; c__Clostridia; o__Oscillospirales; f__Ruminococcaceae; g__Ruminococcus; s__uncultured rumen bacterium	0	5	0	0	0	0	0	0	0	0	9	6	0	0	0	0	0	0	0	0	0	0	39	7
ASV954	d__Bacteria; p__Firmicutes; c__Clostridia; o__Oscillospirales; f__Ruminococcaceae; g__Ruminococcus; s__uncultured rumen bacterium	0	0	0	17	0	0	0	9	0	0	0	0	0	0	0	0	0	10	0	0	0	0	0	8
ASV955	d__Bacteria; p__Bacteroidota; c__Bacteroidia; o__Bacteroidales; f__Prevotellaceae; g__Prevotella; s__uncultured rumen bacterium	0	0	0	0	0	0	0	0	0	0	65	0	0	0	0	0	0	0	0	0	0	0	0	0
ASV956	d__Bacteria; p__Firmicutes; c__Clostridia; o__Peptostreptococcales-Tissierellales; f__Anaerovoracaceae; g__Family XIII AD3011 group; s__uncultured bacterium	0	0	0	0	0	0	0	0	0	0	0	0	0	0	0	23	0	0	0	0	0	0	56	0
ASV957	d__Bacteria; p__Bacteroidota; c__Bacteroidia; o__Bacteroidales; f__Rikenellaceae; g__Rikenellaceae RC9 gut group; s__uncultured rumen bacterium	0	59	0	0	0	0	0	0	0	0	0	0	0	0	0	0	0	0	0	0	0	0	0	0
ASV958	Unclassified	0	0	15	0	0	0	0	0	0	0	0	5	0	0	20	0	0	0	0	13	0	0	0	17
ASV959	d__Bacteria; p__Firmicutes; c__Bacilli; o__Mycoplasmatales; f__Mycoplasmataceae; g__Mycoplasma; s__uncultured bacterium	0	0	14	0	0	0	0	0	0	0	0	13	0	0	0	0	0	0	13	34	0	0	0	0
ASV960	d__Bacteria; p__Firmicutes; c__Clostridia; o__Lachnospirales; f__Lachnospiraceae; g__[Eubacterium] eligens group; s__uncultured bacterium	0	0	0	0	52	0	8	0	0	0	0	0	0	0	0	0	0	0	0	0	0	0	0	0
ASV961	d__Bacteria; p__Bacteroidota; c__Bacteroidia; o__Bacteroidales; f__Rikenellaceae; g__Rikenellaceae RC9 gut group; s__uncultured rumen bacterium	0	0	0	0	0	0	0	0	0	0	19	0	0	0	27	0	0	7	20	0	0	0	0	0
ASV962	d__Bacteria; p__Firmicutes; c__Clostridia; o__Lachnospirales; f__Lachnospiraceae; g__Butyrivibrio	0	0	0	0	0	0	0	0	0	0	0	0	0	0	95	0	0	0	0	0	0	0	0	0
ASV963	d__Bacteria; p__Bacteroidota; c__Bacteroidia; o__Bacteroidales; f__Prevotellaceae; g__Prevotellaceae UCG-003	0	0	0	0	0	0	0	0	0	0	0	0	0	0	0	0	21	0	0	53	0	0	0	0
ASV964	d__Bacteria; p__Bacteroidota; c__Bacteroidia; o__Bacteroidales; f__Prevotellaceae; g__Prevotella; s__uncultured bacterium	17	0	0	30	0	0	0	10	0	0	0	0	0	0	0	0	0	0	0	0	0	0	0	0
ASV965	d__Bacteria; p__Firmicutes; c__Clostridia; o__Clostridia UCG-014; f__norank; g__norank; s__uncultured bacterium	6	0	0	9	0	0	0	0	0	0	0	0	0	0	0	0	0	20	0	0	0	19	0	0
ASV966	d__Bacteria; p__Firmicutes; c__Negativicutes; o__Veillonellales-Selenomonadales; f__Veillonellaceae; g__Megasphaera	11	0	0	0	0	0	0	0	15	0	0	0	0	16	0	0	0	0	0	0	10	0	0	0
ASV967	d__Bacteria; p__Firmicutes; c__Clostridia; o__Lachnospirales; f__Lachnospiraceae; g__[Eubacterium] ruminantium group; s__uncultured rumen bacterium	15	0	0	0	0	0	0	0	0	0	16	17	0	0	0	0	0	0	0	0	0	0	11	7
ASV968	d__Bacteria; p__Proteobacteria; c__Alphaproteobacteria; o__Rhodospirillales; f__uncultured; g__norank; s__uncultured bacterium	12	0	0	0	21	0	0	8	0	0	9	0	0	0	0	0	0	0	0	0	0	0	0	0
ASV969	d__Bacteria; p__Firmicutes; c__Clostridia; o__Oscillospirales; f__Ruminococcaceae; g__Ruminococcus; s__uncultured bacterium	0	0	0	0	0	0	0	15	0	0	0	0	0	0	0	0	0	0	18	0	14	0	9	0
ASV970	d__Bacteria; p__Firmicutes; c__Clostridia; o__Oscillospirales; f__Ruminococcaceae; g__UCG-001; s__uncultured bacterium	0	0	0	0	0	0	0	0	0	0	0	0	0	0	22	0	0	0	0	0	0	32	0	6
ASV971	d__Bacteria; p__Bacteroidota; c__Bacteroidia; o__Bacteroidales; f__Prevotellaceae; g__Prevotella; s__uncultured rumen bacterium	0	0	0	0	0	0	0	0	0	0	0	0	0	0	0	0	0	0	0	0	0	0	0	47
ASV972	d__Bacteria; p__Firmicutes; c__Clostridia; o__Oscillospirales; f__[Eubacterium] coprostanoligenes group; g__norank; s__uncultured rumen bacterium	10	17	0	0	10	0	0	0	0	0	0	0	0	0	0	0	0	0	0	0	6	0	11	0
ASV973	d__Bacteria; p__Firmicutes; c__Clostridia; o__Lachnospirales; f__Lachnospiraceae; g__Marvinbryantia; s__uncultured rumen bacterium	0	9	0	0	0	0	0	0	0	0	0	0	0	0	15	0	0	9	0	0	0	0	20	16
ASV974	d__Bacteria; p__Fibrobacterota; c__Fibrobacteria; o__Fibrobacterales; f__Fibrobacteraceae; g__Fibrobacter; s__uncultured rumen bacterium	0	11	0	0	0	0	0	0	0	0	28	0	0	0	25	0	0	0	0	0	0	0	0	0
ASV975	d__Bacteria; p__Bacteroidota; c__Bacteroidia; o__Bacteroidales; f__Rikenellaceae; g__Rikenellaceae RC9 gut group; s__uncultured bacterium	0	0	0	0	0	12	0	32	16	0	0	0	0	0	0	0	0	0	0	0	0	0	0	0
ASV976	d__Bacteria; p__Firmicutes; c__Clostridia; o__Lachnospirales; f__Lachnospiraceae; g__Lachnospiraceae NK3A20 group; s__uncultured bacterium	0	0	0	0	0	0	0	0	0	0	0	11	0	0	16	20	0	0	0	0	0	16	0	0
ASV977	d__Bacteria; p__Bacteroidota; c__Bacteroidia; o__Bacteroidales; f__Prevotellaceae; g__Prevotella; s__uncultured rumen bacterium	0	0	0	0	0	0	0	0	0	0	0	16	0	0	0	10	0	15	0	0	0	0	0	10
ASV978	d__Bacteria; p__Bacteroidota; c__Bacteroidia; o__Bacteroidales; f__Rikenellaceae; g__Rikenellaceae RC9 gut group; s__uncultured bacterium	0	0	0	0	0	0	0	0	0	0	0	0	6	0	0	9	0	19	0	0	0	0	0	13
ASV979	d__Bacteria; p__Firmicutes; c__Clostridia; o__Oscillospirales; f__Ruminococcaceae; g__Ruminococcus; s__uncultured bacterium	0	0	0	0	0	0	0	0	0	0	0	0	0	0	0	0	0	0	28	0	25	0	0	0
ASV980	d__Bacteria; p__Firmicutes; c__Clostridia; o__Peptostreptococcales-Tissierellales; f__Anaerovoracaceae; g__Anaerovorax; s__uncultured rumen bacterium	0	17	12	0	10	0	0	0	0	0	0	0	0	0	20	0	0	0	0	0	0	0	0	6
ASV981	d__Bacteria; p__Bacteroidota; c__Bacteroidia; o__Bacteroidales; f__Bacteroidales UCG-001; g__norank; s__uncultured rumen bacterium	0	0	10	0	0	0	0	0	0	0	14	0	10	0	12	0	0	0	0	0	0	8	0	11
ASV982	d__Bacteria; p__Firmicutes; c__Clostridia; o__Oscillospirales; f__Oscillospiraceae; g__Colidextribacter	0	0	0	23	29	0	0	0	0	0	0	0	0	0	0	0	0	0	0	0	0	0	0	0
ASV983	d__Bacteria; p__Spirochaetota; c__Spirochaetia; o__Spirochaetales; f__Spirochaetaceae; g__Treponema; s__uncultured rumen bacterium	0	0	0	16	0	14	0	19	0	9	0	0	0	0	0	0	0	0	0	0	0	0	0	0
ASV984	d__Bacteria; p__Firmicutes; c__Clostridia; o__Lachnospirales; f__Lachnospiraceae	0	0	0	0	12	0	0	9	8	0	0	5	0	6	0	11	0	0	0	0	4	0	0	0
ASV985	d__Bacteria; p__Firmicutes; c__Clostridia; o__Lachnospirales; f__Lachnospiraceae; g__Lachnospiraceae XPB1014 group; s__uncultured bacterium	0	0	0	0	0	0	0	11	0	0	0	0	22	0	0	0	0	0	0	0	0	24	0	0
ASV986	d__Bacteria; p__Bacteroidota; c__Bacteroidia; o__Bacteroidales; f__Prevotellaceae; g__Prevotella	0	0	0	0	0	0	0	0	0	0	0	0	0	0	0	0	0	55	0	0	0	0	0	0
ASV987	d__Bacteria; p__Bacteroidota; c__Bacteroidia; o__Bacteroidales; f__Prevotellaceae; g__Prevotellaceae UCG-003; s__uncultured rumen bacterium	0	0	0	0	0	0	0	0	0	0	0	0	0	0	0	0	0	0	0	79	0	0	0	0
ASV988	d__Bacteria; p__Bacteroidota; c__Bacteroidia; o__Bacteroidales; f__Muribaculaceae; g__norank; s__uncultured bacterium	0	0	0	0	0	0	0	0	0	0	0	0	0	0	0	0	0	0	0	0	41	0	0	0
ASV989	d__Bacteria; p__Fibrobacterota; c__Fibrobacteria; o__Fibrobacterales; f__Fibrobacteraceae; g__Fibrobacter; s__Fibrobacter succinogenes subsp. succinogenes S85	27	0	0	0	0	0	0	0	0	0	0	0	0	0	0	0	0	0	0	0	0	0	0	24
ASV990	d__Bacteria; p__Firmicutes; c__Clostridia; o__Monoglobales; f__Monoglobaceae; g__Monoglobus; s__uncultured bacterium	0	21	0	0	0	0	0	0	0	0	0	0	14	0	0	0	0	0	4	0	0	22	0	0
ASV991	d__Bacteria; p__Bacteroidota; c__Bacteroidia; o__Bacteroidales; f__Prevotellaceae; g__Prevotellaceae UCG-001; s__uncultured rumen bacterium	0	0	0	0	0	0	0	0	0	0	62	0	0	0	0	0	0	0	0	0	0	0	0	0
ASV992	d__Bacteria; p__Fibrobacterota; c__Fibrobacteria; o__Fibrobacterales; f__Fibrobacteraceae; g__Fibrobacter	0	0	0	0	0	0	0	0	0	0	68	0	0	0	0	0	0	0	0	0	0	0	0	0
ASV993	d__Bacteria; p__Bacteroidota; c__Bacteroidia; o__Bacteroidales; f__Prevotellaceae; g__Prevotella; s__uncultured rumen bacterium	0	0	0	0	0	0	0	0	0	0	0	0	0	0	0	0	0	0	31	0	0	0	0	23
ASV994	d__Bacteria; p__Firmicutes; c__Clostridia; o__Christensenellales; f__Christensenellaceae; g__Christensenellaceae R-7 group; s__uncultured rumen bacterium	0	0	0	0	0	0	0	0	0	0	0	0	0	0	0	0	0	0	0	0	0	0	0	52
ASV995	d__Bacteria; p__Firmicutes; c__Clostridia; o__Oscillospirales; f__[Eubacterium] coprostanoligenes group; g__norank; s__uncultured bacterium	12	0	0	0	0	0	0	0	0	0	0	0	7	0	0	11	0	12	7	0	6	0	0	0
ASV996	d__Bacteria; p__Bacteroidota; c__Bacteroidia; o__Bacteroidales; f__Muribaculaceae; g__norank; s__uncultured rumen bacterium	0	60	0	0	0	0	0	0	0	0	0	0	0	0	0	0	0	0	0	0	0	0	0	0
ASV997	d__Bacteria; p__Bacteroidota; c__Bacteroidia; o__Bacteroidales; f__Muribaculaceae; g__norank; s__uncultured bacterium	0	0	0	0	10	0	0	0	0	0	9	16	0	0	9	0	0	4	0	0	8	0	0	0
ASV998	d__Bacteria; p__Firmicutes; c__Clostridia; o__Oscillospirales; f__Ruminococcaceae; g__Ruminococcus	0	0	0	0	8	0	0	0	0	0	0	0	0	0	66	7	0	0	0	0	0	0	0	0
ASV999	d__Bacteria; p__Firmicutes; c__Clostridia; o__Oscillospirales; f__Ruminococcaceae; g__Ruminococcus; s__uncultured rumen bacterium	0	0	0	0	0	0	0	25	0	0	21	10	0	0	0	0	0	0	0	0	0	0	0	0
ASV1000	d__Bacteria; p__Spirochaetota; c__Spirochaetia; o__Spirochaetales; f__Spirochaetaceae; g__Treponema; s__uncultured bacterium	0	0	0	0	0	0	0	0	17	0	0	21	0	0	0	0	0	0	0	0	0	20	0	0
ASV1001	d__Bacteria; p__Firmicutes; c__Clostridia; o__Christensenellales; f__Christensenellaceae; g__Christensenellaceae R-7 group; s__uncultured bacterium	0	52	0	0	0	0	0	0	0	0	0	0	0	0	0	0	0	0	0	0	0	0	0	0
ASV1002	d__Bacteria; p__Bacteroidota; c__Bacteroidia; o__Bacteroidales; f__Rikenellaceae; g__Rikenellaceae RC9 gut group; s__uncultured rumen bacterium	0	0	45	0	0	0	0	0	0	0	0	0	0	0	0	0	0	0	0	0	0	0	23	0
ASV1003	d__Bacteria; p__Firmicutes; c__Clostridia; o__Oscillospirales; f__Ruminococcaceae; g__CAG-352; s__uncultured rumen bacterium	0	0	67	0	0	0	0	0	0	0	0	0	0	0	0	0	0	0	0	0	0	0	0	0
ASV1004	d__Bacteria; p__Spirochaetota; c__Spirochaetia; o__Spirochaetales; f__Spirochaetaceae; g__Treponema; s__uncultured Treponema sp.	0	0	0	12	0	16	0	10	0	6	0	0	0	4	0	0	8	0	0	0	0	0	0	0
ASV1005	d__Bacteria; p__Firmicutes; c__Clostridia; o__Lachnospirales; f__Lachnospiraceae; g__Shuttleworthia; s__uncultured Lachnospiraceae bacterium	0	0	0	0	18	0	0	3	13	5	0	0	0	0	0	18	0	0	0	0	0	0	0	0
ASV1006	d__Bacteria; p__Bacteroidota; c__Bacteroidia; o__Bacteroidales; f__Prevotellaceae; g__Prevotella; s__uncultured rumen bacterium	0	0	0	0	18	0	0	0	0	27	0	0	0	0	0	0	0	0	0	0	5	0	0	0
ASV1007	d__Bacteria; p__Bacteroidota; c__Bacteroidia; o__Bacteroidales; f__Prevotellaceae; g__Prevotella; s__uncultured rumen bacterium	0	0	0	0	0	0	0	0	0	0	70	0	0	0	0	0	0	0	0	0	0	0	0	0
ASV1008	d__Bacteria; p__Firmicutes; c__Clostridia; o__Oscillospirales; f__Ruminococcaceae; g__UCG-001; s__uncultured bacterium	0	0	0	0	0	0	0	0	0	0	0	0	0	0	0	0	0	22	0	0	22	0	0	0
ASV1009	d__Bacteria; p__Bacteroidota; c__Bacteroidia; o__Bacteroidales; f__Prevotellaceae; g__Prevotellaceae UCG-003; s__uncultured rumen bacterium	0	0	0	0	0	0	0	0	0	0	0	0	0	0	0	0	0	0	0	79	0	0	0	0
ASV1010	d__Bacteria; p__Firmicutes; c__Negativicutes; o__Acidaminococcales; f__Acidaminococcaceae; g__Succiniclasticum; s__uncultured rumen bacterium	0	0	0	0	0	0	0	0	0	0	0	0	0	0	0	0	0	0	0	0	39	0	0	0
ASV1011	d__Bacteria; p__Bacteroidota; c__Bacteroidia; o__Bacteroidales; f__Prevotellaceae; g__Prevotella; s__uncultured bacterium	26	0	0	10	0	0	0	15	0	0	0	0	0	0	0	0	0	0	0	0	0	0	0	0
ASV1012	d__Bacteria; p__Bacteroidota; c__Bacteroidia; o__Bacteroidales; f__F082; g__norank; s__uncultured bacterium	0	0	63	0	0	0	0	0	0	0	0	0	0	0	0	0	0	0	0	0	0	0	0	0
ASV1013	d__Bacteria; p__Firmicutes; c__Clostridia; o__Lachnospirales; f__Lachnospiraceae; g__Lachnospiraceae NK3A20 group; s__uncultured rumen bacterium	0	0	0	0	6	0	0	21	0	0	0	0	0	0	0	0	0	0	0	0	19	9	0	0
ASV1014	d__Bacteria; p__Bacteroidota; c__Bacteroidia; o__Bacteroidales; f__Muribaculaceae; g__norank; s__uncultured rumen bacterium	0	0	0	0	0	0	0	0	0	0	52	0	11	0	0	0	0	0	0	0	0	0	0	0
ASV1015	d__Bacteria; p__Bacteroidota; c__Bacteroidia; o__Bacteroidales; f__Prevotellaceae; g__Prevotella; s__uncultured bacterium	0	0	0	0	0	0	0	0	0	0	0	0	0	0	0	0	0	51	0	0	0	0	0	0
ASV1016	d__Bacteria; p__Firmicutes; c__Clostridia; o__Clostridia UCG-014; f__norank; g__norank; s__uncultured bacterium	11	0	0	10	0	6	0	0	4	0	0	0	3	0	0	0	0	0	0	0	8	0	0	0
ASV1017	d__Bacteria; p__Spirochaetota; c__Spirochaetia; o__Spirochaetales; f__Spirochaetaceae; g__Treponema; s__uncultured bacterium	0	12	0	0	0	0	0	0	0	0	0	0	0	0	12	0	0	0	0	0	0	0	0	30
ASV1018	d__Bacteria; p__Bacteroidota; c__Bacteroidia; o__Bacteroidales; f__Prevotellaceae; g__Prevotella; s__uncultured rumen bacterium	0	0	66	0	0	0	0	0	0	0	0	0	0	0	0	0	0	0	0	0	0	0	0	0
ASV1019	d__Bacteria; p__Fibrobacterota; c__Fibrobacteria; o__Fibrobacterales; f__Fibrobacteraceae; g__Fibrobacter	0	0	24	0	0	0	0	0	0	0	26	12	0	0	0	0	0	0	0	0	0	0	0	0
ASV1020	d__Bacteria; p__Spirochaetota; c__Spirochaetia; o__Spirochaetales; f__Spirochaetaceae; g__Treponema; s__uncultured rumen bacterium	0	0	0	0	9	0	21	4	0	0	0	0	9	0	0	16	0	0	0	0	10	0	0	0
ASV1021	d__Bacteria; p__Firmicutes; c__Clostridia; o__Lachnospirales; f__Lachnospiraceae	0	0	0	0	0	0	0	48	0	0	0	0	0	0	0	0	0	0	0	0	0	0	0	0
ASV1022	d__Bacteria; p__Bacteroidota; c__Bacteroidia; o__Bacteroidales; f__Prevotellaceae; g__Prevotella; s__uncultured rumen bacterium	0	0	0	0	0	0	0	0	0	0	0	0	0	0	0	0	0	0	0	0	22	0	0	17
ASV1023	d__Bacteria; p__Bacteroidota; c__Bacteroidia; o__Bacteroidales; f__Prevotellaceae; g__Prevotella; s__uncultured rumen bacterium	4	5	4	0	0	0	0	0	0	7	10	7	9	3	0	0	0	0	0	0	0	0	0	7
ASV1024	d__Bacteria; p__Bacteroidota; c__Bacteroidia; o__Bacteroidales; f__Prevotellaceae; g__Prevotella; s__uncultured bacterium	2	12	0	4	7	0	3	0	0	0	0	0	4	0	0	4	0	0	5	10	0	5	0	0
ASV1025	d__Bacteria; p__Firmicutes; c__Clostridia; o__Lachnospirales; f__Lachnospiraceae; g__probable genus 10; s__uncultured rumen bacterium	0	56	0	0	0	0	0	0	0	0	0	0	0	0	0	0	0	0	0	0	0	0	0	0
ASV1026	d__Bacteria; p__Firmicutes; c__Clostridia; o__Christensenellales; f__Christensenellaceae; g__Christensenellaceae R-7 group; s__uncultured bacterium	0	0	0	0	3	0	4	0	0	0	0	15	14	0	0	0	0	7	0	0	6	0	0	0
ASV1027	d__Bacteria; p__Bacteroidota; c__Bacteroidia; o__Bacteroidales; f__Prevotellaceae; g__Prevotella; s__uncultured rumen bacterium	0	0	0	0	0	0	0	32	0	11	0	0	0	0	0	0	0	0	0	0	0	0	0	0
ASV1028	d__Bacteria; p__Bacteroidota; c__Bacteroidia; o__Bacteroidales; f__Prevotellaceae; g__Prevotella; s__uncultured rumen bacterium	0	0	0	0	0	0	0	0	0	0	0	0	0	0	0	0	0	0	0	0	0	51	0	0
ASV1029	d__Bacteria; p__Firmicutes; c__Clostridia; o__Oscillospirales; f__Ruminococcaceae; g__Ruminococcus; s__uncultured rumen bacterium	0	0	0	0	0	0	0	0	0	0	0	0	0	0	0	0	0	0	0	0	0	20	0	35
ASV1030	d__Bacteria; p__Firmicutes; c__Bacilli; o__RF39; f__norank; g__norank; s__uncultured bacterium	22	0	0	7	0	0	0	0	0	0	0	0	0	0	0	0	5	0	0	0	6	0	0	0
ASV1031	d__Bacteria; p__Firmicutes; c__Clostridia; o__Lachnospirales; f__Lachnospiraceae; g__Lachnospiraceae ND3007 group; s__uncultured rumen bacterium	0	20	0	0	0	0	0	0	0	0	0	4	0	0	0	0	0	9	0	15	0	8	0	0
ASV1032	d__Bacteria; p__Bacteroidota; c__Bacteroidia; o__Bacteroidales; f__Prevotellaceae; g__Prevotella; s__uncultured bacterium	0	13	11	0	0	0	0	0	0	0	5	0	6	0	0	0	0	0	0	0	0	0	0	16
ASV1033	d__Bacteria; p__Bacteroidota; c__Bacteroidia; o__Bacteroidales; f__Rikenellaceae; g__Rikenellaceae RC9 gut group; s__uncultured rumen bacterium	0	4	17	0	0	0	0	0	0	0	0	0	0	0	0	0	0	14	9	0	0	0	12	0
ASV1034	d__Bacteria; p__Bacteroidota; c__Bacteroidia; o__Bacteroidales; f__Bacteroidales BS11 gut group; g__norank; s__uncultured rumen bacterium	0	0	30	0	0	0	0	0	0	0	0	11	0	0	0	0	0	0	0	0	0	0	0	17
ASV1035	d__Bacteria; p__Firmicutes; c__Clostridia; o__Clostridia UCG-014; f__norank; g__norank	0	0	59	0	0	0	0	0	0	0	0	0	0	0	0	0	0	0	0	0	0	0	0	0
ASV1036	d__Bacteria; p__Firmicutes; c__Clostridia; o__Oscillospirales; f__Ruminococcaceae; g__CAG-352; s__uncultured rumen bacterium	0	0	26	0	0	0	0	0	0	0	0	0	9	0	31	0	0	0	0	0	0	0	11	0
ASV1037	d__Bacteria; p__Firmicutes; c__Clostridia; o__Lachnospirales; f__Lachnospiraceae; g__[Eubacterium] ruminantium group	0	0	0	1	13	0	0	0	8	0	0	5	0	0	0	0	0	9	4	0	9	0	0	0
ASV1038	d__Bacteria; p__Firmicutes; c__Clostridia; o__Lachnospirales; f__Lachnospiraceae; g__[Eubacterium] ruminantium group	0	0	0	0	0	0	0	0	0	0	0	0	0	0	0	0	40	0	0	0	7	0	0	0
ASV1039	d__Bacteria; p__Proteobacteria; c__Alphaproteobacteria; o__Rhodospirillales; f__uncultured; g__norank; s__uncultured bacterium	11	0	0	0	0	0	0	0	0	0	0	0	22	0	0	0	0	0	0	0	16	0	0	0
ASV1040	d__Bacteria; p__Bacteroidota; c__Bacteroidia; o__Bacteroidales; f__Prevotellaceae; g__Prevotellaceae UCG-001; s__uncultured rumen bacterium	0	20	0	0	20	0	0	0	0	0	0	0	0	0	0	0	0	0	0	0	0	0	0	0
ASV1041	d__Bacteria; p__Bacteroidota; c__Bacteroidia; o__Bacteroidales; f__F082; g__norank; s__uncultured rumen bacterium	0	3	0	0	0	0	0	0	0	0	0	4	13	0	3	0	0	8	4	0	0	7	13	4
ASV1042	d__Bacteria; p__Bacteroidota; c__Bacteroidia; o__Bacteroidales; f__Prevotellaceae; g__Prevotella; s__uncultured rumen bacterium	0	0	69	0	0	0	0	0	0	0	0	0	0	0	0	0	0	0	0	0	0	0	0	0
ASV1043	d__Bacteria; p__Bacteroidota; c__Bacteroidia; o__Bacteroidales; f__Prevotellaceae; g__Prevotella; s__uncultured rumen bacterium	0	0	17	0	0	0	0	0	4	0	0	0	0	0	27	0	0	16	0	0	0	0	0	0
ASV1044	d__Bacteria; p__Spirochaetota; c__Spirochaetia; o__Spirochaetales; f__Spirochaetaceae; g__Treponema	0	0	0	22	8	0	0	5	0	4	0	0	0	0	0	7	0	2	0	0	0	0	0	0
ASV1045	d__Bacteria; p__Firmicutes; c__Clostridia; o__Lachnospirales; f__Lachnospiraceae; g__Lachnospiraceae NK3A20 group; s__uncultured bacterium	0	0	0	18	0	0	0	0	0	0	0	12	0	0	0	0	0	15	0	0	0	0	0	0
ASV1046	d__Bacteria; p__Bacteroidota; c__Bacteroidia; o__Bacteroidales; f__Prevotellaceae; g__Prevotellaceae UCG-001; s__uncultured rumen bacterium	0	0	0	0	0	0	77	0	0	0	0	0	0	0	0	0	0	0	0	0	0	0	0	0
ASV1047	d__Bacteria; p__Firmicutes; c__Clostridia; o__Lachnospirales; f__Lachnospiraceae; g__Lachnospiraceae NK3A20 group; s__uncultured rumen bacterium	0	0	0	0	0	0	10	0	0	0	0	0	0	0	44	0	0	0	20	0	0	0	0	0
ASV1048	d__Bacteria; p__Firmicutes; c__Clostridia; o__Oscillospirales; f__Ruminococcaceae; g__CAG-352; s__uncultured bacterium	0	0	0	0	0	0	0	34	0	0	0	0	0	0	0	0	0	0	0	0	12	0	0	0
ASV1049	d__Bacteria; p__Spirochaetota; c__Spirochaetia; o__Spirochaetales; f__Spirochaetaceae; g__Treponema; s__uncultured rumen bacterium	0	0	0	0	0	0	0	0	0	0	0	0	19	0	0	0	0	0	0	0	0	0	5	33
ASV1050	d__Bacteria; p__Firmicutes; c__Clostridia; o__Oscillospirales; f__Ruminococcaceae; g__Ruminococcus; s__uncultured bacterium	0	0	0	0	0	0	0	0	0	0	0	0	0	0	0	0	0	42	0	0	0	0	0	0
ASV1051	d__Bacteria; p__Firmicutes; c__Clostridia; o__Clostridia UCG-014; f__norank; g__norank; s__uncultured bacterium	48	0	0	0	0	0	0	0	0	0	0	0	0	0	0	0	0	0	0	0	0	0	0	0
ASV1052	d__Bacteria; p__Firmicutes; c__Clostridia; o__Lachnospirales; f__Lachnospiraceae; g__Lachnospiraceae NK3A20 group	17	0	0	0	0	0	0	0	0	0	0	0	0	0	0	0	0	0	0	0	11	13	0	0
ASV1053	d__Bacteria; p__Firmicutes; c__Clostridia; o__Lachnospirales; f__Lachnospiraceae; g__Lachnospiraceae XPB1014 group; s__uncultured rumen bacterium	0	13	14	0	0	0	0	0	0	0	11	8	0	0	0	0	0	0	0	0	0	0	11	0
ASV1054	d__Bacteria; p__Firmicutes; c__Clostridia; o__Lachnospirales; f__Lachnospiraceae; g__Butyrivibrio; s__uncultured bacterium	0	52	0	0	0	0	0	0	0	0	0	0	0	0	0	0	0	0	0	0	0	0	0	0
ASV1055	d__Bacteria; p__Bacteroidota; c__Bacteroidia; o__Bacteroidales; f__F082; g__norank; s__uncultured bacterium	0	0	24	0	0	0	17	0	0	0	0	0	0	0	0	0	0	0	23	0	0	0	0	0
ASV1056	d__Bacteria; p__Firmicutes; c__Clostridia; o__Oscillospirales; f__Oscillospiraceae; g__NK4A214 group; s__uncultured bacterium	0	0	9	0	0	0	0	0	0	0	10	0	0	0	0	0	0	0	19	10	0	0	9	6
ASV1057	d__Bacteria; p__Firmicutes; c__Clostridia; o__Lachnospirales; f__Lachnospiraceae; g__Lachnospiraceae AC2044 group; s__uncultured bacterium	0	0	0	11	0	0	0	0	0	0	25	0	16	0	0	0	0	0	0	0	0	0	0	0
ASV1058	d__Bacteria; p__Bacteroidota; c__Bacteroidia; o__Bacteroidales; f__Prevotellaceae; g__Alloprevotella; s__uncultured Bacteroidales bacterium	0	0	0	2	9	16	0	0	15	2	0	0	0	0	0	0	0	0	0	0	0	0	0	0
ASV1059	d__Bacteria; p__Bacteroidota; c__Bacteroidia; o__Bacteroidales; f__Prevotellaceae; g__Prevotella; s__uncultured rumen bacterium	0	0	0	0	0	0	15	0	0	10	0	0	14	0	9	0	0	0	20	0	0	0	0	0
ASV1060	d__Bacteria; p__Firmicutes; c__Bacilli; o__Erysipelotrichales; f__Erysipelatoclostridiaceae; g__UCG-004; s__uncultured bacterium	0	0	0	0	0	0	0	2	14	0	0	0	0	3	0	0	0	0	19	0	0	10	0	6
ASV1061	d__Bacteria; p__Bacteroidota; c__Bacteroidia; o__Bacteroidales; f__F082; g__norank; s__uncultured rumen bacterium	0	0	0	0	0	0	0	0	0	9	0	0	0	0	0	0	0	18	0	0	0	0	28	0
ASV1062	d__Bacteria; p__Proteobacteria; c__Gammaproteobacteria; o__Enterobacterales; f__Succinivibrionaceae; g__Ruminobacter; s__uncultured rumen bacterium	0	0	7	0	0	0	9	13	0	0	11	11	5	0	0	0	0	0	0	0	0	0	0	0
ASV1063	d__Bacteria; p__Spirochaetota; c__Spirochaetia; o__Spirochaetales; f__Spirochaetaceae; g__Treponema	0	0	0	0	2	0	0	17	0	0	5	0	0	0	0	0	0	0	17	0	0	0	12	0
ASV1064	d__Bacteria; p__Firmicutes; c__Bacilli; o__Acholeplasmatales; f__Acholeplasmataceae; g__Anaeroplasma	0	0	0	0	0	0	0	27	0	0	0	0	0	0	0	21	0	0	0	0	0	0	0	0
ASV1065	d__Bacteria; p__Bacteroidota; c__Bacteroidia; o__Bacteroidales; f__Muribaculaceae; g__norank; s__uncultured bacterium	0	0	0	0	0	0	0	0	0	0	19	0	35	0	0	0	0	0	0	0	0	0	0	0
ASV1066	d__Bacteria; p__Firmicutes; c__Bacilli; o__Mycoplasmatales; f__Mycoplasmataceae; g__Mycoplasma; s__uncultured rumen bacterium	0	0	0	0	0	0	0	0	0	0	0	0	13	0	0	4	0	0	39	0	0	0	0	0
ASV1067	d__Bacteria; p__Bacteroidota; c__Bacteroidia; o__Bacteroidales; f__F082; g__norank; s__uncultured bacterium	0	0	0	0	0	0	0	0	0	0	0	0	52	0	0	0	0	0	0	0	0	0	0	0
ASV1068	d__Bacteria; p__Firmicutes; c__Clostridia; o__Oscillospirales; f__Ruminococcaceae; g__uncultured; s__uncultured bacterium	7	7	0	0	4	0	0	0	0	0	0	0	11	0	13	0	0	0	0	0	5	6	0	0
ASV1069	d__Bacteria; p__Firmicutes; c__Clostridia; o__Oscillospirales; f__Ruminococcaceae; g__Ruminococcus; s__uncultured rumen bacterium	19	0	0	0	0	0	0	0	0	0	0	0	0	0	9	18	0	11	0	0	0	0	0	0
ASV1070	d__Bacteria; p__Bacteroidota; c__Bacteroidia; o__Bacteroidales; f__F082; g__norank; s__uncultured rumen bacterium	0	0	65	0	0	0	0	0	0	0	0	0	0	0	0	0	0	0	0	0	0	0	0	0
ASV1071	d__Bacteria; p__Bacteroidota; c__Bacteroidia; o__Bacteroidales; f__Prevotellaceae; g__Prevotella; s__uncultured bacterium	0	0	23	0	0	0	0	0	0	0	0	4	0	0	0	0	0	11	0	0	0	0	30	0
ASV1072	d__Bacteria; p__Patescibacteria; c__Saccharimonadia; o__Saccharimonadales; f__Saccharimonadaceae; g__Candidatus Saccharimonas; s__uncultured rumen bacterium	0	0	27	0	0	0	0	25	0	0	0	0	0	0	0	0	0	0	0	0	0	0	0	0
ASV1073	d__Bacteria; p__Firmicutes; c__Clostridia; o__Clostridia UCG-014; f__norank; g__norank; s__uncultured rumen bacterium	0	0	0	16	0	0	0	25	0	0	0	0	0	0	0	0	0	0	0	0	5	0	0	0
ASV1074	d__Bacteria; p__Bacteroidota; c__Bacteroidia; o__Bacteroidales; f__Prevotellaceae; g__Prevotella_9; s__uncultured bacterium	0	0	0	0	9	15	0	8	11	0	0	0	0	7	0	0	0	0	0	0	5	0	0	0
ASV1075	d__Bacteria; p__Elusimicrobiota; c__Elusimicrobia; o__Elusimicrobiales; f__Elusimicrobiaceae; g__Elusimicrobium	0	0	0	0	0	0	0	42	0	0	0	0	0	0	0	0	0	0	0	0	0	0	0	0
ASV1076	d__Bacteria; p__Bacteroidota; c__Bacteroidia; o__Bacteroidales; f__Muribaculaceae; g__norank; s__uncultured rumen bacterium	0	0	0	0	0	0	0	0	0	0	0	0	0	0	80	0	0	0	0	0	0	0	0	0
ASV1077	d__Bacteria; p__Firmicutes; c__Clostridia; o__Clostridia UCG-014; f__norank; g__norank; s__uncultured bacterium	0	0	0	0	0	0	0	0	0	0	0	0	0	0	5	0	0	0	0	0	15	0	17	8
ASV1078	d__Bacteria; p__Firmicutes; c__Clostridia; o__Oscillospirales; f__Ruminococcaceae; g__Ruminococcus; s__uncultured bacterium	0	0	0	0	0	0	0	0	0	0	0	0	0	0	0	0	0	0	0	0	37	0	0	0
ASV1079	d__Bacteria; p__Firmicutes; c__Clostridia; o__Oscillospirales; f__Ruminococcaceae; g__Ruminococcus; s__uncultured rumen bacterium	14	0	0	0	0	0	0	0	0	0	0	0	0	0	0	0	0	0	0	0	23	0	0	0
ASV1080	d__Bacteria; p__Patescibacteria; c__Saccharimonadia; o__Saccharimonadales; f__Saccharimonadaceae; g__Candidatus Saccharimonas; s__uncultured rumen bacterium	6	21	0	0	0	0	0	0	0	0	22	0	0	0	0	0	0	0	0	0	0	0	0	0
ASV1081	d__Bacteria; p__Bacteroidota; c__Bacteroidia; o__Bacteroidales; f__Prevotellaceae; g__Prevotella; s__uncultured rumen bacterium	0	28	0	0	0	0	0	0	0	0	0	0	0	0	0	5	0	0	0	0	0	0	0	13
ASV1082	d__Bacteria; p__Firmicutes; c__Bacilli; o__Erysipelotrichales; f__Erysipelatoclostridiaceae; g__UCG-004; s__uncultured bacterium	0	5	0	4	0	0	0	0	0	0	0	8	21	0	0	0	0	0	0	0	0	7	7	0
ASV1083	d__Bacteria; p__Proteobacteria; c__Gammaproteobacteria; o__Enterobacterales; f__Succinivibrionaceae; g__Succinivibrio; s__uncultured rumen bacterium	0	0	11	0	0	0	0	0	0	0	12	0	22	0	0	0	0	0	0	0	0	0	0	5
ASV1084	d__Bacteria; p__Firmicutes; c__Clostridia; o__Oscillospirales; f__[Eubacterium] coprostanoligenes group; g__norank; s__uncultured bacterium	0	0	32	0	0	0	0	0	0	0	0	0	21	0	0	0	0	0	0	0	0	0	0	0
ASV1085	d__Bacteria; p__Bacteroidota; c__Bacteroidia; o__Bacteroidales; f__Rikenellaceae; g__Rikenellaceae RC9 gut group; s__uncultured bacterium	0	0	0	0	8	10	0	0	0	0	0	0	0	0	0	0	0	5	13	0	6	0	0	0
ASV1086	d__Bacteria; p__Bacteroidota; c__Bacteroidia; o__Bacteroidales; f__Prevotellaceae; g__Prevotella; s__uncultured bacterium	0	0	0	0	0	0	0	35	0	0	0	0	0	5	0	0	0	0	0	0	0	0	0	0
ASV1087	d__Bacteria; p__Firmicutes; c__Clostridia; o__Oscillospirales; f__UCG-010; g__norank; s__uncultured rumen bacterium	0	0	0	0	0	0	0	0	0	0	0	0	11	0	14	8	0	4	0	0	0	7	0	15
ASV1088	d__Bacteria; p__Firmicutes; c__Clostridia; o__Lachnospirales; f__Lachnospiraceae; g__Lachnospiraceae XPB1014 group; s__uncultured bacterium	16	0	0	4	0	0	0	0	0	0	0	0	0	0	0	0	0	0	5	0	18	0	0	0
ASV1089	d__Bacteria; p__Bacteroidota; c__Bacteroidia; o__Bacteroidales; f__Prevotellaceae; g__Prevotella; s__uncultured rumen bacterium	0	10	45	0	0	0	0	0	0	0	0	0	0	0	0	0	0	14	0	0	0	0	0	0
ASV1090	d__Bacteria; p__Firmicutes; c__Clostridia; o__Lachnospirales; f__Lachnospiraceae; g__Lachnospiraceae UCG-008; s__uncultured bacterium	0	5	0	0	0	0	0	0	0	0	0	0	0	0	19	0	0	0	0	13	0	5	0	15
ASV1091	d__Bacteria; p__Firmicutes; c__Clostridia; o__Lachnospirales; f__Lachnospiraceae; g__Lachnospiraceae UCG-008; s__uncultured rumen bacterium	0	0	0	6	0	0	10	0	0	0	0	0	0	0	0	0	0	8	0	23	12	0	0	0
ASV1092	d__Bacteria; p__Firmicutes; c__Clostridia; o__Oscillospirales; f__Ruminococcaceae; g__Ruminococcus	0	0	0	0	0	0	0	23	0	0	0	0	0	10	0	0	0	0	0	5	0	13	0	0
ASV1093	d__Bacteria; p__Cyanobacteria; c__Vampirivibrionia; o__Gastranaerophilales; f__norank; g__norank; s__uncultured bacterium	0	0	0	0	0	0	0	0	25	0	0	0	0	0	0	0	0	0	0	0	0	0	0	23
ASV1094	d__Bacteria; p__Bacteroidota; c__Bacteroidia; o__Bacteroidales; f__Prevotellaceae; g__Prevotella; s__uncultured rumen bacterium	0	0	0	0	0	0	0	0	0	0	0	21	0	0	0	0	0	0	0	0	0	24	0	0
ASV1095	d__Bacteria; p__Firmicutes; c__Clostridia; o__Oscillospirales; f__UCG-010; g__norank; s__uncultured bacterium	0	0	0	0	0	0	0	0	0	0	0	0	0	0	0	55	0	0	0	0	0	0	0	0
ASV1096	d__Bacteria; p__Firmicutes; c__Clostridia; o__Oscillospirales; f__Oscillospiraceae; g__uncultured; s__uncultured rumen bacterium	0	0	0	0	0	0	0	0	0	0	0	0	0	0	0	0	0	34	0	25	0	0	0	0
ASV1097	d__Bacteria; p__Firmicutes; c__Bacilli; o__Erysipelotrichales; f__Erysipelatoclostridiaceae; g__UCG-004; s__uncultured bacterium	0	0	0	0	0	0	0	0	0	0	0	0	0	0	0	0	0	0	0	0	37	0	0	0
ASV1098	d__Bacteria; p__Bacteroidota; c__Bacteroidia; o__Bacteroidales; f__Prevotellaceae; g__Prevotella; s__uncultured rumen bacterium	0	0	0	0	0	0	0	0	0	0	0	0	0	0	0	0	0	0	0	0	0	0	0	41
ASV1099	d__Bacteria; p__Firmicutes; c__Clostridia; o__Lachnospirales; f__Lachnospiraceae; g__Coprococcus; s__uncultured bacterium	24	0	0	0	0	0	0	18	0	0	0	0	0	0	0	0	0	0	0	0	0	0	0	0
ASV1100	d__Bacteria; p__Bacteroidota; c__Bacteroidia; o__Bacteroidales; f__Prevotellaceae; g__Prevotella; s__uncultured bacterium	0	5	0	0	0	0	0	0	0	0	0	12	0	0	0	9	0	0	0	0	0	10	0	13
ASV1101	d__Bacteria; p__Bacteroidota; c__Bacteroidia; o__Bacteroidales; f__Prevotellaceae; g__Prevotellaceae UCG-003; s__uncultured bacterium	0	0	20	0	0	0	0	0	0	0	0	0	0	0	0	0	0	0	0	44	0	0	0	0
ASV1102	d__Bacteria; p__Bacteroidota; c__Bacteroidia; o__Bacteroidales; f__Prevotellaceae; g__Prevotellaceae UCG-003; s__uncultured rumen bacterium	0	0	0	0	0	0	0	20	31	0	0	0	0	0	0	0	0	0	0	0	0	0	0	0
ASV1103	d__Bacteria; p__Bacteroidota; c__Bacteroidia; o__Bacteroidales; f__F082; g__norank; s__uncultured rumen bacterium	0	0	0	0	0	0	0	0	0	0	22	0	19	0	0	0	0	0	0	0	0	0	0	9
ASV1104	d__Bacteria; p__Firmicutes; c__Clostridia; o__Oscillospirales; f__Oscillospiraceae; g__NK4A214 group; s__uncultured bacterium	0	0	0	0	0	0	0	0	0	0	21	29	0	0	0	0	0	0	0	0	0	0	0	0
ASV1105	d__Bacteria; p__Firmicutes; c__Negativicutes; o__Veillonellales-Selenomonadales; f__Selenomonadaceae; g__Veillonellaceae UCG-001; s__uncultured rumen bacterium	0	0	0	0	0	0	0	0	0	0	0	0	0	0	29	0	0	23	0	0	0	0	0	0
ASV1106	d__Bacteria; p__Bacteroidota; c__Bacteroidia; o__Bacteroidales; f__Muribaculaceae; g__norank; s__uncultured rumen bacterium	15	0	0	0	0	0	0	0	0	0	0	18	0	0	22	0	0	0	0	0	0	0	0	0
ASV1107	d__Bacteria; p__Firmicutes; c__Clostridia; o__Lachnospirales; f__Lachnospiraceae; g__Lachnospiraceae NK4A136 group; s__uncultured bacterium	7	0	0	0	7	2	0	0	4	0	0	0	0	0	0	0	0	0	0	0	19	0	0	0
ASV1108	d__Bacteria; p__Bacteroidota; c__Bacteroidia; o__Bacteroidales; f__Prevotellaceae; g__Prevotellaceae UCG-003; s__uncultured rumen bacterium	45	0	0	0	0	0	0	0	0	0	0	0	0	0	0	0	0	0	0	0	0	0	0	0
ASV1109	d__Bacteria; p__Firmicutes; c__Clostridia; o__Peptostreptococcales-Tissierellales; f__Anaerovoracaceae; g__[Eubacterium] nodatum group	0	19	0	2	0	0	0	0	0	0	14	0	0	0	0	0	0	3	0	0	0	0	0	7
ASV1110	d__Bacteria; p__Bacteroidota; c__Bacteroidia; o__Bacteroidales; f__Prevotellaceae; g__Prevotellaceae UCG-003	0	13	0	0	0	0	0	0	0	0	0	0	0	0	0	0	0	0	0	0	22	0	0	0
ASV1111	d__Bacteria; p__Firmicutes; c__Clostridia; o__Oscillospirales; f__UCG-010; g__norank; s__uncultured bacterium	0	19	0	0	0	0	0	0	0	0	0	0	0	0	0	0	0	13	0	20	0	0	0	0
ASV1112	d__Bacteria; p__Firmicutes; c__Clostridia; o__Clostridia UCG-014; f__norank; g__norank; s__uncultured bacterium	0	5	0	0	0	0	0	0	0	0	0	0	0	0	0	0	0	8	14	0	0	10	0	9
ASV1113	d__Bacteria; p__Firmicutes; c__Clostridia; o__Peptostreptococcales-Tissierellales; f__Anaerovoracaceae; g__Anaerovorax; s__uncultured bacterium	0	0	4	0	0	0	0	6	0	0	0	0	11	0	23	3	0	0	4	0	0	7	2	0
ASV1114	d__Bacteria; p__Firmicutes; c__Clostridia; o__Oscillospirales; f__Oscillospiraceae; g__NK4A214 group; s__uncultured bacterium	0	0	0	33	0	0	0	0	0	0	0	0	0	0	0	0	0	0	0	0	0	0	0	0
ASV1115	d__Bacteria; p__Bacteroidota; c__Bacteroidia; o__Bacteroidales; f__Prevotellaceae; g__Prevotella; s__uncultured bacterium	0	0	0	19	0	0	0	0	0	0	0	0	0	0	0	0	0	26	0	0	0	0	0	0
ASV1116	d__Bacteria; p__Actinobacteriota; c__Coriobacteriia; o__Coriobacteriales; f__Atopobiaceae; g__Coriobacteriaceae UCG-002; s__uncultured bacterium	0	0	0	0	0	0	0	0	0	0	0	0	0	0	0	0	0	25	13	0	4	3	0	0
ASV1117	d__Bacteria; p__Firmicutes; c__Clostridia; o__Oscillospirales; f__Oscillospiraceae; g__NK4A214 group; s__uncultured bacterium	0	0	0	0	0	0	0	0	0	0	0	0	0	0	0	0	0	50	0	0	0	0	0	0
ASV1118	d__Bacteria; p__Bacteroidota; c__Bacteroidia; o__Bacteroidales; f__Rikenellaceae; g__Rikenellaceae RC9 gut group	0	0	0	0	0	0	0	0	0	0	0	0	0	0	0	0	0	0	0	0	42	0	0	0
ASV1119	d__Bacteria; p__Firmicutes; c__Clostridia; o__Lachnospirales; f__Lachnospiraceae; g__Lachnospiraceae UCG-001; s__uncultured bacterium	40	0	0	0	0	0	0	0	0	0	0	0	0	0	0	0	0	0	0	0	0	0	0	0
ASV1120	d__Bacteria; p__Firmicutes; c__Clostridia; o__Oscillospirales; f__Hungateiclostridiaceae; g__Saccharofermentans; s__uncultured rumen bacterium	0	6	0	13	0	0	0	0	0	0	0	0	0	0	37	0	0	0	0	0	0	0	0	0
ASV1121	d__Bacteria; p__Bacteroidota; c__Bacteroidia; o__Bacteroidales; f__Rikenellaceae; g__Rikenellaceae RC9 gut group; s__uncultured rumen bacterium	0	0	0	8	11	0	0	0	0	0	0	0	25	0	0	0	0	0	0	0	0	0	0	0
ASV1122	d__Bacteria; p__Bacteroidota; c__Bacteroidia; o__Bacteroidales; f__Muribaculaceae; g__norank; s__uncultured bacterium	0	0	0	0	0	0	0	0	0	12	0	0	0	0	0	0	31	0	0	0	0	0	0	0
ASV1123	d__Bacteria; p__Bacteroidota; c__Bacteroidia; o__Bacteroidales; f__Rikenellaceae; g__Rikenellaceae RC9 gut group; s__uncultured rumen bacterium	39	0	0	0	0	0	0	7	0	0	0	0	0	0	0	0	0	0	0	0	0	0	0	0
ASV1124	d__Bacteria; p__Firmicutes; c__Clostridia; o__Oscillospirales; f__Ruminococcaceae; g__Ruminococcus; s__uncultured bacterium	0	6	17	0	0	0	6	0	0	0	23	0	0	0	0	0	0	4	0	0	0	0	0	0
ASV1125	d__Bacteria; p__Bacteroidota; c__Bacteroidia; o__Bacteroidales; f__Prevotellaceae; g__Prevotellaceae YAB2003 group; s__uncultured rumen bacterium	0	0	0	32	0	0	0	0	0	0	0	0	0	0	0	0	0	0	0	0	0	0	0	0
ASV1126	d__Bacteria; p__Bacteroidota; c__Bacteroidia; o__Bacteroidales; f__Prevotellaceae; g__Prevotellaceae NK3B31 group; s__uncultured rumen bacterium	0	0	0	6	0	0	0	29	0	0	0	0	0	0	6	0	0	0	0	0	0	0	0	0
ASV1127	d__Bacteria; p__Bacteroidota; c__Bacteroidia; o__Bacteroidales; f__Prevotellaceae; g__Prevotella; s__uncultured rumen bacterium	0	0	0	9	0	0	0	0	0	0	0	0	0	0	0	0	0	0	0	0	5	0	0	25
ASV1128	d__Bacteria; p__Bacteroidota; c__Bacteroidia; o__Bacteroidales; f__Prevotellaceae; g__Alloprevotella; s__uncultured bacterium	0	0	0	0	3	0	0	6	3	0	0	0	0	10	0	0	8	0	0	0	0	4	9	0
ASV1129	d__Bacteria; p__Firmicutes; c__Clostridia; o__Lachnospirales; f__Lachnospiraceae; g__Lachnospiraceae ND3007 group; s__uncultured rumen bacterium	0	0	0	0	6	0	0	0	0	0	0	0	0	0	0	0	0	29	0	0	0	0	0	0
ASV1130	d__Bacteria; p__Firmicutes; c__Clostridia; o__Christensenellales; f__Christensenellaceae; g__Christensenellaceae R-7 group	0	0	0	0	0	0	34	0	0	0	0	0	0	0	0	0	0	0	0	0	0	23	0	0
ASV1131	d__Bacteria; p__Firmicutes; c__Bacilli; o__Mycoplasmatales; f__Mycoplasmataceae; g__Mycoplasma; s__uncultured bacterium	0	0	0	0	0	0	0	0	0	0	21	0	0	0	47	0	0	0	0	0	0	0	0	0
ASV1132	d__Bacteria; p__Bacteroidota; c__Bacteroidia; o__Bacteroidales; f__Muribaculaceae; g__norank; s__uncultured bacterium	0	0	0	0	0	0	0	0	0	0	0	0	0	0	15	0	0	0	14	0	0	14	0	7
ASV1133	d__Bacteria; p__Firmicutes; c__Clostridia; o__Oscillospirales; f__Ruminococcaceae; g__uncultured; s__uncultured rumen bacterium	0	0	0	0	0	0	0	0	0	0	0	0	0	0	0	0	0	11	41	0	0	0	0	0
ASV1134	d__Bacteria; p__Bacteroidota; c__Bacteroidia; o__Bacteroidales; f__Prevotellaceae; g__Prevotellaceae NK3B31 group; s__uncultured rumen bacterium	16	0	0	0	0	0	0	0	0	0	0	0	0	0	18	13	0	0	0	0	7	0	0	0
ASV1135	d__Bacteria; p__Bacteroidota; c__Bacteroidia; o__Bacteroidales; f__Prevotellaceae; g__Prevotellaceae UCG-001; s__uncultured rumen bacterium	0	27	0	0	0	0	0	0	0	0	0	0	0	0	0	0	0	0	0	0	0	12	0	0
ASV1136	d__Bacteria; p__Bacteroidota; c__Bacteroidia; o__Bacteroidales; f__Prevotellaceae; g__Prevotella; s__uncultured rumen bacterium	0	39	0	0	0	0	0	0	0	0	0	0	0	0	0	0	0	0	0	0	0	0	0	0
ASV1137	d__Bacteria; p__Bacteroidota; c__Bacteroidia; o__Bacteroidales; f__Rikenellaceae; g__Rikenellaceae RC9 gut group; s__uncultured rumen bacterium	0	2	29	0	0	0	0	0	0	0	0	0	0	0	0	0	0	0	9	0	0	0	17	0
ASV1138	d__Bacteria; p__Firmicutes; c__Clostridia; o__Oscillospirales; f__Ruminococcaceae; g__Ruminococcus; s__uncultured rumen bacterium	0	0	7	0	0	0	0	0	0	0	0	0	0	0	37	21	0	0	0	0	0	0	0	0
ASV1139	d__Bacteria; p__Proteobacteria; c__Gammaproteobacteria; o__Enterobacterales; f__Succinivibrionaceae; g__Succinivibrio; s__uncultured rumen bacterium	0	0	0	0	11	8	0	4	11	20	0	0	0	0	0	0	0	0	0	0	2	0	0	0
ASV1140	d__Bacteria; p__Cyanobacteria; c__Vampirivibrionia; o__Gastranaerophilales; f__norank; g__norank; s__uncultured bacterium	0	0	0	0	7	0	0	0	0	0	0	0	0	0	0	0	0	0	0	0	23	0	0	0
ASV1141	d__Bacteria; p__Firmicutes; c__Clostridia; o__Clostridia UCG-014; f__norank; g__norank; s__uncultured rumen bacterium	0	0	0	0	0	0	0	0	0	0	0	0	54	0	0	0	0	0	0	0	0	0	0	0
ASV1142	d__Bacteria; p__Firmicutes; c__Clostridia; o__Clostridia UCG-014; f__norank; g__norank; s__uncultured rumen bacterium	0	0	0	0	0	0	0	0	0	0	0	0	0	39	0	0	0	0	0	0	0	0	0	0
ASV1143	d__Bacteria; p__Firmicutes; c__Clostridia; o__Clostridia UCG-014; f__norank; g__norank; s__uncultured bacterium	0	0	0	0	0	0	0	0	0	0	0	0	0	0	0	0	0	0	22	0	20	0	0	0
ASV1144	d__Bacteria; p__Firmicutes; c__Clostridia; o__Clostridia UCG-014; f__norank; g__norank; s__uncultured bacterium	0	0	0	0	0	0	0	0	0	0	0	0	0	0	0	0	0	0	0	0	0	44	0	0
ASV1145	d__Bacteria; p__Firmicutes; c__Clostridia; o__Oscillospirales; f__Ruminococcaceae; g__CAG-352; s__uncultured bacterium	0	0	34	0	0	0	0	0	0	0	0	0	20	0	0	0	0	0	0	0	0	0	0	0
ASV1146	d__Bacteria; p__Firmicutes; c__Clostridia; o__Oscillospirales; f__Ruminococcaceae; g__Ruminococcus; s__uncultured bacterium	0	0	0	25	0	0	0	13	0	0	0	0	0	0	0	0	0	0	0	0	0	0	0	0
ASV1147	d__Bacteria; p__Bacteroidota; c__Bacteroidia; o__Bacteroidales; f__Prevotellaceae; g__Prevotella; s__uncultured rumen bacterium	0	0	0	14	0	0	0	12	0	0	0	0	0	0	0	23	0	0	0	0	0	0	0	0
ASV1148	d__Bacteria; p__Cyanobacteria; c__Vampirivibrionia; o__Gastranaerophilales; f__norank; g__norank; s__uncultured rumen bacterium	0	0	0	9	4	0	0	5	0	0	0	0	0	0	0	0	0	0	0	0	24	0	0	0
ASV1149	d__Bacteria; p__Bacteroidota; c__Bacteroidia; o__Bacteroidales; f__Prevotellaceae; g__Prevotella; s__uncultured rumen bacterium	0	0	0	0	11	0	0	0	0	0	0	0	0	0	0	0	0	0	0	0	0	28	0	0
ASV1150	d__Bacteria; p__Bacteroidota; c__Bacteroidia; o__Bacteroidales; f__Prevotellaceae; g__Prevotellaceae UCG-001; s__uncultured rumen bacterium	0	0	0	0	16	0	0	20	0	0	0	0	0	6	0	0	0	0	0	0	0	0	0	0
ASV1151	d__Bacteria; p__Firmicutes; c__Clostridia; o__Lachnospirales; f__Lachnospiraceae; g__Lachnospiraceae AC2044 group	0	0	0	0	17	0	0	0	0	0	10	0	0	0	0	0	0	0	0	0	6	0	0	0
ASV1152	d__Bacteria; p__Firmicutes; c__Clostridia; o__Lachnospirales; f__Lachnospiraceae; g__Lachnospiraceae NK3A20 group; s__uncultured rumen bacterium	0	0	0	0	0	19	0	0	0	0	0	0	0	17	0	0	0	0	0	0	6	0	0	0
ASV1153	d__Bacteria; p__Firmicutes; c__Clostridia; o__Oscillospirales; f__Ruminococcaceae; g__Ruminococcus; s__uncultured bacterium	0	0	0	0	0	0	0	29	0	0	0	0	0	0	0	0	0	0	0	0	0	0	23	0
ASV1154	d__Bacteria; p__Firmicutes; c__Clostridia; o__Oscillospirales; f__Hungateiclostridiaceae; g__Saccharofermentans; s__uncultured rumen bacterium	0	0	0	0	0	0	0	0	0	0	0	21	0	0	0	5	0	0	0	0	11	0	0	0
ASV1155	d__Bacteria; p__Firmicutes; c__Clostridia; o__Lachnospirales; f__Lachnospiraceae; g__Lachnospiraceae ND3007 group	0	0	0	0	0	0	0	0	0	0	0	0	11	0	0	5	0	0	0	0	0	0	0	29
ASV1156	d__Bacteria; p__Firmicutes; c__Clostridia; o__Clostridia UCG-014; f__norank; g__norank; s__uncultured rumen bacterium	3	10	0	0	0	1	0	21	0	0	0	0	0	0	0	0	0	0	0	0	0	0	12	0
ASV1157	d__Bacteria; p__Bacteroidota; c__Bacteroidia; o__Bacteroidales; f__Prevotellaceae; g__Prevotella; s__uncultured rumen bacterium	0	0	60	0	0	0	0	0	0	0	0	0	0	0	0	0	0	0	0	0	0	0	0	0
ASV1158	d__Bacteria; p__Bacteroidota; c__Bacteroidia; o__Bacteroidales; f__Rikenellaceae; g__Rikenellaceae RC9 gut group; s__uncultured rumen bacterium	0	0	0	18	0	0	0	0	0	0	0	0	0	0	0	0	0	0	0	0	14	0	0	0
ASV1159	d__Bacteria; p__Firmicutes; c__Clostridia; o__Oscillospirales; f__Ruminococcaceae; g__CAG-352; s__uncultured bacterium	0	0	0	0	0	0	0	31	0	0	0	0	0	0	0	17	0	0	0	0	0	0	0	0
ASV1160	d__Bacteria; p__Firmicutes; c__Clostridia; o__Clostridia UCG-014; f__norank; g__norank; s__uncultured bacterium	0	0	0	0	0	0	0	40	0	0	0	0	0	0	0	0	0	0	0	0	0	0	0	0
ASV1161	d__Bacteria; p__Firmicutes; c__Clostridia; o__Lachnospirales; f__Lachnospiraceae; g__Lachnospiraceae AC2044 group; s__uncultured bacterium	0	0	0	0	0	0	0	0	0	0	0	0	0	0	71	0	0	0	0	0	0	0	0	0
ASV1162	d__Bacteria; p__Proteobacteria; c__Gammaproteobacteria; o__Burkholderiales; f__Sutterellaceae; g__Sutterella; s__uncultured bacterium	4	0	0	0	0	0	0	6	0	0	4	0	8	0	0	0	0	0	0	0	9	6	0	0
ASV1163	d__Bacteria; p__Firmicutes; c__Clostridia; o__Lachnospirales; f__Lachnospiraceae; g__Acetitomaculum	12	0	0	0	12	0	0	2	0	0	0	10	0	0	0	0	0	0	0	0	0	0	0	0
ASV1164	d__Bacteria; p__Firmicutes; c__Clostridia; o__Oscillospirales; f__UCG-010; g__norank; s__uncultured bacterium	6	9	0	0	0	0	0	0	0	3	0	0	0	0	19	0	0	0	0	0	0	10	0	0
ASV1165	d__Bacteria; p__Firmicutes; c__Clostridia; o__Clostridia UCG-014; f__norank; g__norank; s__uncultured rumen bacterium	0	0	0	0	11	0	0	0	0	0	0	0	5	0	11	0	0	0	0	0	0	24	0	0
ASV1166	d__Bacteria; p__Firmicutes; c__Negativicutes; o__Acidaminococcales; f__Acidaminococcaceae; g__Succiniclasticum; s__uncultured rumen bacterium	0	0	0	0	14	0	14	0	0	0	0	0	0	0	0	0	0	11	9	0	0	0	0	0
ASV1167	d__Bacteria; p__Firmicutes; c__Clostridia; o__Oscillospirales; f__Ruminococcaceae; g__Ruminococcus; s__uncultured rumen bacterium	0	0	0	0	0	0	0	19	0	0	4	0	0	0	10	0	0	3	0	0	7	4	0	0
ASV1168	d__Bacteria; p__Bacteroidota; c__Bacteroidia; o__Bacteroidales; f__Prevotellaceae; g__Prevotella; s__uncultured bacterium	0	0	0	0	0	0	0	7	0	0	0	0	0	0	0	0	0	0	0	0	29	0	0	0
ASV1169	d__Bacteria; p__Firmicutes; c__Clostridia; o__Lachnospirales; f__Lachnospiraceae	12	0	0	5	0	0	0	0	0	0	0	0	4	0	16	0	0	0	6	0	9	0	0	0
ASV1170	d__Bacteria; p__Firmicutes; c__Clostridia; o__Oscillospirales; f__Ruminococcaceae; g__Ruminococcus; s__Ruminococcus flavefaciens	0	0	0	0	10	0	0	0	0	0	0	0	27	0	0	0	0	0	0	0	0	0	0	0
ASV1171	d__Bacteria; p__Bacteroidota; c__Bacteroidia; o__Bacteroidales; f__Muribaculaceae; g__norank; s__uncultured bacterium	0	0	0	0	0	0	0	40	0	0	0	0	0	0	0	0	0	0	0	0	0	0	0	0
ASV1172	d__Bacteria; p__Bacteroidota; c__Bacteroidia; o__Bacteroidales; f__Prevotellaceae; g__Prevotella; s__uncultured bacterium	0	0	0	0	0	0	0	40	0	0	0	0	0	0	0	0	0	0	0	0	0	0	0	0
ASV1173	d__Bacteria; p__Bacteroidota; c__Bacteroidia; o__Bacteroidales; f__Muribaculaceae; g__norank; s__uncultured rumen bacterium	0	0	0	0	0	0	0	0	0	0	28	0	0	0	0	0	0	0	0	26	0	0	0	0
ASV1174	d__Bacteria; p__Bacteroidota; c__Bacteroidia; o__Bacteroidales; f__Prevotellaceae; g__Prevotella; s__uncultured rumen bacterium	0	0	0	0	0	0	0	0	0	0	0	0	0	0	0	44	0	0	0	0	0	0	0	0
ASV1175	d__Bacteria; p__Bacteroidota; c__Bacteroidia; o__Bacteroidales; f__Prevotellaceae; g__Prevotellaceae NK3B31 group; s__uncultured rumen bacterium	0	0	0	0	0	0	0	0	0	0	0	0	0	0	0	0	0	0	0	0	0	50	0	0
ASV1176	d__Bacteria; p__Firmicutes; c__Clostridia; o__Clostridia UCG-014; f__norank; g__norank	0	0	0	0	0	0	0	0	0	0	0	0	0	0	0	0	0	0	0	0	0	42	0	0
ASV1177	d__Bacteria; p__Firmicutes; c__Clostridia; o__Clostridia UCG-014; f__norank; g__norank; s__uncultured bacterium	0	0	0	0	0	0	0	0	0	0	0	0	0	0	0	0	0	0	0	0	0	0	59	0
ASV1178	d__Bacteria; p__Firmicutes; c__Clostridia; o__Lachnospirales; f__Lachnospiraceae; g__Lachnospiraceae NK3A20 group; s__uncultured rumen bacterium	28	0	0	0	4	0	0	0	0	0	0	0	0	0	0	0	0	0	0	0	0	0	0	0
ASV1179	d__Bacteria; p__Bacteroidota; c__Bacteroidia; o__Bacteroidales; f__Muribaculaceae; g__norank; s__uncultured rumen bacterium	0	0	47	0	0	0	0	0	0	0	0	0	0	0	0	0	0	0	0	0	0	0	0	0
ASV1180	d__Bacteria; p__Firmicutes; c__Clostridia; o__Oscillospirales; f__Ruminococcaceae; g__Ruminococcus	0	0	0	0	19	0	0	0	0	0	0	0	0	0	0	0	0	0	0	0	0	12	0	0
ASV1181	d__Bacteria; p__Firmicutes; c__Clostridia; o__Oscillospirales; f__Ruminococcaceae; g__Ruminococcus; s__uncultured rumen bacterium	0	0	0	0	0	0	0	14	0	0	0	13	0	0	0	0	0	0	0	0	0	13	0	0
ASV1182	d__Bacteria; p__Firmicutes; c__Clostridia; o__Oscillospirales; f__Ruminococcaceae; g__uncultured; s__uncultured bacterium	0	0	0	0	0	0	0	12	0	0	0	0	0	0	0	0	0	11	20	0	0	0	0	0
ASV1183	d__Bacteria; p__Bacteroidota; c__Bacteroidia; o__Bacteroidales; f__Rikenellaceae; g__Rikenellaceae RC9 gut group; s__uncultured bacterium	0	0	0	0	0	0	0	2	0	0	0	0	11	0	0	7	0	5	10	0	0	0	11	0
ASV1184	d__Bacteria; p__Bacteroidota; c__Bacteroidia; o__Bacteroidales; f__Prevotellaceae; g__Prevotella; s__uncultured bacterium	0	0	0	0	0	0	0	37	0	0	0	0	0	0	0	0	0	0	0	0	0	0	0	0
ASV1185	d__Bacteria; p__Bacteroidota; c__Bacteroidia; o__Bacteroidales; f__Prevotellaceae; g__Prevotella; s__uncultured rumen bacterium	0	0	0	0	0	0	0	0	0	0	0	45	0	0	0	0	0	0	0	0	0	0	0	0
ASV1186	d__Bacteria; p__Firmicutes; c__Bacilli; o__Mycoplasmatales; f__Mycoplasmataceae; g__Mycoplasma; s__uncultured bacterium	0	0	0	0	0	0	0	0	0	0	0	0	24	0	0	0	0	9	0	0	0	0	12	0
ASV1187	d__Bacteria; p__Firmicutes; c__Clostridia; o__Peptostreptococcales-Tissierellales; f__Anaerovoracaceae; g__Anaerovorax; s__uncultured bacterium	0	0	0	0	0	0	0	0	0	0	0	0	11	0	0	0	0	8	0	0	8	11	0	0
ASV1188	d__Bacteria; p__Firmicutes; c__Clostridia; o__Oscillospirales; f__[Eubacterium] coprostanoligenes group; g__norank; s__uncultured rumen bacterium	0	0	0	0	0	0	0	0	0	0	0	0	0	0	0	0	0	0	0	0	0	32	0	0
ASV1189	d__Bacteria; p__Firmicutes; c__Clostridia; o__Oscillospirales; f__Ruminococcaceae; g__Ruminococcus; s__uncultured bacterium	6	0	0	0	0	0	0	30	0	0	0	0	0	0	4	0	0	0	0	0	0	0	0	0
ASV1190	d__Bacteria; p__Firmicutes; c__Clostridia; o__Oscillospirales; f__[Eubacterium] coprostanoligenes group; g__norank; s__uncultured bacterium	0	11	0	0	0	0	0	0	0	0	0	0	3	0	0	0	0	0	9	0	0	0	34	0
ASV1191	d__Bacteria; p__Bacteroidota; c__Bacteroidia; o__Bacteroidales; f__Rikenellaceae; g__Rikenellaceae RC9 gut group; s__uncultured bacterium	0	12	0	0	0	0	0	0	0	0	0	6	0	0	0	0	0	0	0	0	0	26	0	0
ASV1192	d__Bacteria; p__Firmicutes; c__Clostridia; o__Lachnospirales; f__Lachnospiraceae; g__Shuttleworthia; s__uncultured Lachnospiraceae bacterium	0	10	0	11	0	7	0	0	0	0	0	0	0	9	0	0	0	0	0	0	0	0	0	0
ASV1193	d__Bacteria; p__Firmicutes; c__Clostridia; o__Oscillospirales; f__[Eubacterium] coprostanoligenes group; g__norank; s__uncultured bacterium	0	0	9	0	0	0	0	0	0	0	0	5	8	0	9	0	0	0	0	9	0	0	0	8
ASV1194	d__Bacteria; p__Patescibacteria; c__Saccharimonadia; o__Saccharimonadales; f__Saccharimonadaceae; g__Candidatus Saccharimonas; s__uncultured rumen bacterium	0	0	0	9	0	0	0	0	0	0	0	0	0	0	0	0	0	0	0	0	23	0	0	0
ASV1195	d__Bacteria; p__Firmicutes; c__Clostridia; o__Lachnospirales; f__Lachnospiraceae; g__Lachnospiraceae UCG-008	0	0	0	1	1	0	0	0	2	2	5	0	6	0	15	0	0	0	0	0	0	3	12	0
ASV1196	d__Bacteria; p__Bacteroidota; c__Bacteroidia; o__Bacteroidales; f__Bacteroidales RF16 group; g__norank; s__uncultured bacterium	0	0	0	0	14	0	0	14	0	0	0	0	0	0	0	0	0	0	0	0	11	0	0	0
ASV1197	d__Bacteria; p__Firmicutes; c__Clostridia; o__Lachnospirales; f__Lachnospiraceae; g__uncultured; s__uncultured bacterium	0	0	0	0	3	0	0	3	0	0	0	0	5	0	23	0	0	5	0	0	0	2	0	0
ASV1198	d__Bacteria; p__Firmicutes; c__Clostridia; o__Oscillospirales; f__Ruminococcaceae; g__Ruminococcus	0	0	0	0	0	4	0	0	0	0	0	0	0	0	36	0	0	0	0	0	11	0	0	0
ASV1199	d__Bacteria; p__Firmicutes; c__Negativicutes; o__Veillonellales-Selenomonadales; f__Veillonellaceae; g__Megasphaera; s__uncultured bacterium	0	0	0	0	0	0	35	13	0	0	0	0	0	0	0	0	0	0	0	0	0	0	0	0
ASV1200	d__Bacteria; p__Bacteroidota; c__Bacteroidia; o__Bacteroidales; f__Prevotellaceae; g__Prevotellaceae NK3B31 group; s__uncultured rumen bacterium	0	0	0	0	0	0	0	0	0	0	31	0	0	0	0	0	18	0	0	0	0	0	0	0
ASV1201	d__Bacteria; p__Bacteroidota; c__Bacteroidia; o__Bacteroidales; f__Prevotellaceae; g__Prevotella; s__uncultured bacterium	0	0	0	0	0	0	0	0	0	0	0	0	19	0	0	0	0	0	0	0	0	0	0	20
ASV1202	d__Bacteria; p__Bacteroidota; c__Bacteroidia; o__Bacteroidales; f__Rikenellaceae; g__Rikenellaceae RC9 gut group; s__uncultured rumen bacterium	0	0	0	0	0	0	0	0	0	0	0	0	0	0	15	0	0	18	13	0	0	0	0	0
ASV1203	d__Bacteria; p__Bacteroidota; c__Bacteroidia; o__Bacteroidales; f__Muribaculaceae; g__norank; s__uncultured rumen bacterium	0	0	0	0	0	0	0	0	0	0	0	0	0	0	0	38	0	0	0	0	0	0	0	0
ASV1204	d__Bacteria; p__Bacteroidota; c__Bacteroidia; o__Bacteroidales; f__Prevotellaceae; g__Prevotella; s__uncultured rumen bacterium	0	0	0	0	0	0	0	0	0	0	0	0	0	0	0	0	0	32	0	0	0	10	0	0
ASV1205	d__Bacteria; p__Bacteroidota; c__Bacteroidia; o__Bacteroidales; f__Muribaculaceae; g__norank; s__uncultured bacterium	0	0	0	0	0	0	0	0	0	0	0	0	0	0	0	0	0	0	0	0	35	0	0	0
ASV1206	d__Bacteria; p__Firmicutes; c__Clostridia; o__Christensenellales; f__Christensenellaceae; g__Christensenellaceae R-7 group; s__uncultured rumen bacterium	11	0	0	0	0	0	0	0	0	0	0	0	0	0	48	0	0	0	0	0	0	0	0	0
ASV1207	d__Bacteria; p__Desulfobacterota; c__Desulfuromonadia; o__Bradymonadales; f__norank; g__norank; s__uncultured bacterium	16	0	0	0	0	0	0	17	0	0	0	0	0	0	7	0	0	0	0	0	4	0	0	0
ASV1208	d__Bacteria; p__Bacteroidota; c__Bacteroidia; o__Bacteroidales; f__Prevotellaceae; g__Prevotella; s__uncultured rumen bacterium	0	33	0	0	0	0	0	0	0	0	0	0	0	0	0	0	0	0	12	0	0	0	0	0
ASV1209	d__Bacteria; p__Bacteroidota; c__Bacteroidia; o__Bacteroidales; f__Prevotellaceae; g__Prevotella; s__uncultured rumen bacterium	0	0	0	9	0	0	0	0	0	0	0	0	0	0	0	0	0	0	0	0	14	0	0	0
ASV1210	d__Bacteria; p__Firmicutes; c__Clostridia; o__Oscillospirales; f__[Eubacterium] coprostanoligenes group; g__norank; s__uncultured bacterium	0	0	0	0	25	0	0	0	0	0	0	0	0	8	0	0	0	0	0	0	0	0	0	0
ASV1211	d__Bacteria; p__Bacteroidota; c__Bacteroidia; o__Bacteroidales; f__Prevotellaceae; g__Prevotella; s__uncultured rumen bacterium	0	0	0	0	34	0	0	0	0	0	0	0	0	0	0	0	0	0	0	0	0	0	0	0
ASV1212	d__Bacteria; p__Firmicutes; c__Clostridia; o__Oscillospirales; f__Oscillospiraceae; g__NK4A214 group; s__uncultured rumen bacterium	0	0	0	0	0	0	44	0	0	17	0	0	0	0	0	0	0	0	0	0	0	0	0	0
ASV1213	d__Bacteria; p__Fibrobacterota; c__Fibrobacteria; o__Fibrobacterales; f__Fibrobacteraceae; g__Fibrobacter	0	0	0	0	0	0	0	0	0	0	0	0	0	42	0	0	0	0	0	0	0	0	0	0
ASV1214	d__Bacteria; p__Firmicutes; c__Clostridia; o__Clostridia UCG-014; f__norank; g__norank	0	0	0	0	0	0	0	0	0	0	0	0	0	0	0	0	0	0	0	0	0	0	0	39
ASV1215	d__Bacteria; p__Proteobacteria; c__Alphaproteobacteria; o__Rhodospirillales; f__uncultured; g__norank; s__uncultured bacterium	16	0	0	19	0	0	0	0	0	0	0	0	0	0	0	5	0	0	0	0	0	0	0	0
ASV1216	d__Bacteria; p__Bacteroidota; c__Bacteroidia; o__Bacteroidales; f__Rikenellaceae; g__Rikenellaceae RC9 gut group; s__uncultured bacterium	0	14	0	0	0	0	0	0	0	0	0	0	25	0	0	0	0	0	0	0	0	0	0	0
ASV1217	d__Bacteria; p__Bacteroidota; c__Bacteroidia; o__Bacteroidales; f__Prevotellaceae; g__Prevotellaceae UCG-001; s__uncultured rumen bacterium	0	13	0	0	0	0	0	0	0	0	0	10	0	0	23	0	0	0	12	0	0	0	0	0
ASV1218	d__Bacteria; p__Bacteroidota; c__Bacteroidia; o__Bacteroidales; f__Prevotellaceae; g__Prevotella; s__uncultured bacterium	0	0	11	2	0	0	4	0	0	0	0	10	6	0	0	4	0	0	0	0	0	0	0	4
ASV1219	d__Bacteria; p__Bacteroidota; c__Bacteroidia; o__Bacteroidales; f__Bacteroidales RF16 group; g__norank	0	0	38	0	0	0	0	0	0	0	0	0	7	0	0	0	0	0	0	0	0	0	9	0
ASV1220	d__Bacteria; p__Firmicutes; c__Clostridia; o__Oscillospirales; f__Ruminococcaceae; g__uncultured; s__uncultured bacterium	0	0	6	0	0	0	0	0	0	0	14	0	0	0	11	0	0	3	0	0	0	0	17	0
ASV1221	d__Bacteria; p__Fibrobacterota; c__Fibrobacteria; o__Fibrobacterales; f__Fibrobacteraceae; g__Fibrobacter; s__uncultured rumen bacterium	0	0	0	35	0	0	0	0	0	0	0	0	0	0	0	0	0	0	0	0	0	0	0	0
ASV1222	d__Bacteria; p__Proteobacteria; c__Alphaproteobacteria; o__Rhodospirillales; f__uncultured; g__norank; s__uncultured bacterium	0	0	0	0	0	15	0	25	0	0	0	0	0	0	0	0	0	0	0	0	0	0	0	0
ASV1223	d__Bacteria; p__Bacteroidota; c__Bacteroidia; o__Bacteroidales; f__F082; g__norank; s__uncultured rumen bacterium	0	0	0	0	0	0	0	0	0	0	28	0	14	0	0	0	0	0	0	0	0	0	0	0
ASV1224	d__Bacteria; p__Firmicutes; c__Clostridia; o__Oscillospirales; f__Oscillospiraceae; g__UCG-005; s__uncultured rumen bacterium	0	0	0	0	0	0	0	0	0	0	0	15	0	0	0	0	0	0	35	0	0	0	0	0
ASV1225	d__Bacteria; p__Firmicutes; c__Clostridia; o__Oscillospirales; f__[Eubacterium] coprostanoligenes group; g__norank; s__uncultured bacterium	0	0	0	0	0	0	0	0	0	0	0	0	0	0	0	12	0	0	40	0	0	0	0	0
ASV1226	d__Bacteria; p__Bacteroidota; c__Bacteroidia; o__Bacteroidales; f__Rikenellaceae; g__Rikenellaceae RC9 gut group; s__uncultured rumen bacterium	12	0	0	0	0	0	0	4	0	0	0	0	0	0	0	0	0	5	0	0	4	0	12	0
ASV1227	d__Bacteria; p__Proteobacteria; c__Alphaproteobacteria; o__Rhodospirillales; f__uncultured; g__norank; s__uncultured bacterium	40	0	0	0	0	0	0	0	0	0	0	0	0	0	0	0	0	0	0	0	0	0	0	0
ASV1228	d__Bacteria; p__Bacteroidota; c__Bacteroidia; o__Bacteroidales; f__Prevotellaceae; g__Prevotellaceae NK3B31 group; s__uncultured rumen bacterium	11	0	0	0	0	0	10	0	0	0	13	0	0	0	0	0	0	0	0	0	0	12	0	0
ASV1229	d__Bacteria; p__Bacteroidota; c__Bacteroidia; o__Bacteroidales; f__Rikenellaceae; g__Rikenellaceae RC9 gut group; s__uncultured rumen bacterium	4	1	0	0	0	0	0	0	0	0	0	0	0	0	0	7	0	0	10	0	3	9	0	6
ASV1230	d__Bacteria; p__Bacteroidota; c__Bacteroidia; o__Bacteroidales; f__Prevotellaceae; g__Prevotella; s__uncultured rumen bacterium	0	42	0	0	0	0	0	0	0	0	0	0	0	0	0	0	0	0	0	0	0	0	0	0
ASV1231	d__Bacteria; p__Firmicutes; c__Clostridia; o__Oscillospirales; f__UCG-010; g__norank; s__uncultured rumen bacterium	0	6	10	0	0	0	0	0	0	0	0	7	16	0	0	0	0	0	0	0	0	0	6	0
ASV1232	d__Bacteria; p__Firmicutes; c__Clostridia; o__Lachnospirales; f__Lachnospiraceae; g__uncultured; s__uncultured rumen bacterium	0	0	10	0	0	0	0	11	0	0	0	0	0	0	22	9	0	0	0	0	0	0	0	0
ASV1233	d__Bacteria; p__Firmicutes; c__Clostridia; o__Oscillospirales; f__UCG-010; g__norank; s__uncultured rumen bacterium	0	0	20	0	0	0	0	0	0	0	0	0	0	0	27	0	0	0	0	0	0	7	0	0
ASV1234	d__Bacteria; p__Patescibacteria; c__Saccharimonadia; o__Saccharimonadales; f__Saccharimonadaceae; g__Candidatus Saccharimonas; s__uncultured rumen bacterium	0	0	0	17	0	0	0	0	0	0	0	0	0	0	0	0	0	0	24	0	0	0	0	0
ASV1235	d__Bacteria; p__Bacteroidota; c__Bacteroidia; o__Bacteroidales; f__F082; g__norank; s__uncultured rumen bacterium	0	0	0	4	11	1	0	0	9	0	0	0	0	0	0	0	0	0	14	0	3	0	0	0
ASV1236	d__Bacteria; p__Bacteroidota; c__Bacteroidia; o__Bacteroidales; f__F082; g__norank; s__uncultured bacterium	0	0	0	3	0	0	0	0	0	0	0	0	0	0	54	0	0	0	0	0	0	0	0	0
ASV1237	d__Bacteria; p__Firmicutes; c__Clostridia; o__Lachnospirales; f__Lachnospiraceae; g__[Eubacterium] ruminantium group; s__uncultured rumen bacterium	0	0	0	0	27	0	0	0	0	0	0	0	0	0	0	0	0	0	3	0	0	0	0	0
ASV1238	d__Bacteria; p__Firmicutes; c__Clostridia; o__Lachnospirales; f__Lachnospiraceae; g__Blautia; s__uncultured bacterium	0	0	0	0	0	0	0	0	0	0	0	0	0	0	0	7	0	7	0	0	0	0	12	15
ASV1239	d__Bacteria; p__Actinobacteriota; c__Actinobacteria; o__Bifidobacteriales; f__Bifidobacteriaceae; g__Pseudoscardovia	41	0	0	0	0	0	3	0	0	0	0	0	0	0	0	0	0	0	0	0	0	0	0	0
ASV1240	d__Bacteria; p__Firmicutes; c__Clostridia; o__Oscillospirales; f__Oscillospiraceae; g__NK4A214 group; s__uncultured bacterium	13	0	0	0	0	0	0	16	0	0	0	0	0	0	0	0	0	0	0	0	10	0	0	0
ASV1241	d__Bacteria; p__Firmicutes; c__Clostridia; o__Lachnospirales; f__Lachnospiraceae; g__Lachnospiraceae FCS020 group; s__uncultured rumen bacterium	14	0	29	0	0	0	0	0	0	0	0	0	0	0	0	0	0	0	0	0	0	0	0	0
ASV1242	d__Bacteria; p__Desulfobacterota; c__Desulfovibrionia; o__Desulfovibrionales; f__Desulfovibrionaceae; g__Mailhella	0	12	0	0	0	0	0	0	0	0	8	0	10	0	0	0	0	7	0	0	0	4	0	0
ASV1243	d__Bacteria; p__Bacteroidota; c__Bacteroidia; o__Bacteroidales; f__F082; g__norank; s__uncultured bacterium	0	0	49	0	0	0	0	0	0	0	0	0	0	0	0	0	0	0	0	0	0	0	0	0
ASV1244	d__Bacteria; p__Firmicutes; c__Clostridia; o__Oscillospirales; f__Ruminococcaceae; g__Ruminococcus; s__uncultured bacterium	0	0	0	16	0	0	0	0	0	0	0	0	0	0	0	0	0	0	0	0	13	0	0	0
ASV1245	d__Bacteria; p__Bacteroidota; c__Bacteroidia; o__Bacteroidales; f__Prevotellaceae; g__Prevotella; s__uncultured rumen bacterium	0	0	0	0	35	0	0	0	0	0	0	0	0	0	0	0	0	0	0	0	0	0	0	0
ASV1246	d__Bacteria; p__Firmicutes; c__Negativicutes; o__Veillonellales-Selenomonadales; f__Selenomonadaceae; g__Veillonellaceae UCG-001; s__uncultured bacterium	0	0	0	0	0	9	0	0	0	0	0	0	0	0	0	0	0	0	0	0	0	0	40	0
ASV1247	d__Bacteria; p__Bacteroidota; c__Bacteroidia; o__Bacteroidales; f__Prevotellaceae; g__Prevotellaceae UCG-001; s__uncultured bacterium	0	0	0	0	0	0	0	34	0	0	0	0	0	0	0	0	0	0	0	0	0	0	0	0
ASV1248	d__Bacteria; p__Firmicutes; c__Bacilli; o__Erysipelotrichales; f__Erysipelatoclostridiaceae; g__UCG-004; s__uncultured rumen bacterium	0	0	0	0	0	0	0	17	0	0	0	0	0	0	0	0	0	0	0	0	20	0	0	0
ASV1249	d__Bacteria; p__Fibrobacterota; c__Fibrobacteria; o__Fibrobacterales; f__Fibrobacteraceae; g__Fibrobacter; s__uncultured rumen bacterium	0	0	0	0	0	0	0	34	0	0	0	0	0	0	0	0	0	0	0	0	0	0	0	0
ASV1250	d__Bacteria; p__Firmicutes; c__Clostridia; o__Lachnospirales; f__Lachnospiraceae; g__uncultured; s__uncultured bacterium	0	0	0	0	0	0	0	0	0	0	32	0	10	0	0	0	0	0	0	0	0	0	0	0
ASV1251	d__Bacteria; p__Bacteroidota; c__Bacteroidia; o__Bacteroidales; f__Prevotellaceae; g__Prevotellaceae UCG-003; s__uncultured rumen bacterium	0	0	0	0	0	0	0	0	0	0	0	39	0	0	0	0	0	0	0	0	0	0	0	0
ASV1252	d__Bacteria; p__Firmicutes; c__Clostridia; o__Christensenellales; f__Christensenellaceae; g__Christensenellaceae R-7 group; s__uncultured rumen bacterium	0	0	0	0	0	0	0	0	0	0	0	0	21	0	0	0	0	0	0	0	18	0	0	0
ASV1253	d__Bacteria; p__Firmicutes; c__Clostridia; o__Christensenellales; f__Christensenellaceae; g__Christensenellaceae R-7 group; s__uncultured bacterium	0	0	0	0	0	0	0	0	0	0	0	0	10	0	18	0	0	0	0	0	0	10	0	12
ASV1254	d__Bacteria; p__Firmicutes; c__Clostridia; o__Oscillospirales; f__Ruminococcaceae; g__Ruminococcus; s__uncultured rumen bacterium	0	0	0	0	0	0	0	0	0	0	0	0	0	0	63	0	0	0	0	0	0	0	0	0
ASV1255	d__Bacteria; p__Bacteroidota; c__Bacteroidia; o__Bacteroidales; f__Rikenellaceae; g__Rikenellaceae RC9 gut group; s__uncultured rumen bacterium	25	0	9	0	0	0	0	0	0	0	0	0	0	0	0	0	0	0	18	0	0	0	0	0
ASV1256	d__Bacteria; p__Bacteroidota; c__Bacteroidia; o__Bacteroidales; f__Prevotellaceae; g__Prevotella; s__uncultured rumen bacterium	37	0	0	0	0	0	0	0	0	0	0	0	0	0	0	0	0	0	0	0	0	0	0	0
ASV1257	d__Bacteria; p__Firmicutes; c__Clostridia; o__Oscillospirales; f__[Eubacterium] coprostanoligenes group; g__norank; s__uncultured bacterium	17	0	20	0	0	0	0	4	0	0	0	0	0	0	0	0	0	0	0	0	0	0	0	0
ASV1258	d__Bacteria; p__Firmicutes; c__Clostridia; o__Lachnospirales; f__Lachnospiraceae; g__Moryella; s__uncultured bacterium	4	3	0	0	0	0	0	3	0	0	0	13	0	0	23	0	0	0	0	0	0	5	0	0
ASV1259	d__Bacteria; p__Bacteroidota; c__Bacteroidia; o__Bacteroidales; f__F082; g__norank; s__uncultured bacterium	0	36	0	0	0	0	0	0	0	0	0	0	0	0	0	0	0	0	0	0	0	0	0	0
ASV1260	d__Bacteria; p__Firmicutes; c__Clostridia; o__Oscillospirales; f__UCG-010; g__norank; s__uncultured bacterium	0	2	0	0	0	0	0	7	0	0	19	4	4	0	0	0	0	0	7	0	0	0	0	0
ASV1261	d__Bacteria; p__Firmicutes; c__Clostridia; o__Oscillospirales; f__UCG-010; g__norank; s__uncultured rumen bacterium	0	0	35	0	0	0	0	0	0	0	0	0	0	0	0	0	0	0	0	0	0	0	0	12
ASV1262	d__Bacteria; p__Bacteroidota; c__Bacteroidia; o__Bacteroidales; f__Prevotellaceae; g__Prevotella; s__uncultured rumen bacterium	0	0	14	0	0	0	0	0	0	0	0	0	0	0	0	0	0	0	0	0	0	0	0	22
ASV1263	d__Bacteria; p__Bacteroidota; c__Bacteroidia; o__Bacteroidales; f__F082; g__norank; s__uncultured rumen bacterium	0	0	21	0	0	0	0	0	0	0	0	0	0	0	0	0	0	0	0	0	0	0	35	0
ASV1264	d__Bacteria; p__Spirochaetota; c__Spirochaetia; o__Spirochaetales; f__Spirochaetaceae; g__Treponema; s__uncultured rumen bacterium	0	0	0	0	13	0	0	0	0	6	0	0	0	0	0	17	0	0	0	0	0	6	0	0
ASV1265	d__Bacteria; p__Bacteroidota; c__Bacteroidia; o__Bacteroidales; f__Prevotellaceae; g__Prevotella; s__uncultured bacterium	0	0	0	0	0	0	53	0	0	0	0	0	0	0	0	0	0	0	0	0	0	0	0	0
ASV1266	d__Bacteria; p__Firmicutes; c__Clostridia; o__Clostridia UCG-014; f__norank; g__norank; s__uncultured bacterium	0	0	0	0	0	0	0	35	0	0	0	0	0	0	0	0	0	0	0	0	0	0	0	0
ASV1267	d__Bacteria; p__Bacteroidota; c__Bacteroidia; o__Bacteroidales; f__Prevotellaceae; g__Prevotella; s__uncultured rumen bacterium	0	0	0	0	0	0	0	0	0	0	11	0	8	0	0	0	0	0	0	0	9	8	0	0
ASV1268	d__Bacteria; p__Bacteroidota; c__Bacteroidia; o__Bacteroidales; f__Prevotellaceae; g__Prevotella; s__uncultured rumen bacterium	0	0	0	0	0	0	0	0	0	0	14	29	0	0	0	0	0	0	0	0	0	0	0	0
ASV1269	d__Bacteria; p__Firmicutes; c__Clostridia; o__Lachnospirales; f__Lachnospiraceae; g__Lachnospiraceae ND3007 group; s__uncultured bacterium	20	0	0	0	0	0	0	0	0	0	0	0	0	0	0	0	0	0	0	0	9	0	0	6
ASV1270	d__Bacteria; p__Bacteroidota; c__Bacteroidia; o__Bacteroidales; f__Prevotellaceae; g__Prevotellaceae UCG-003; s__uncultured rumen bacterium	0	3	4	0	0	0	6	0	0	0	0	3	0	0	0	5	0	0	0	0	3	10	0	0
ASV1271	d__Bacteria; p__Firmicutes; c__Clostridia; o__Oscillospirales; f__Hungateiclostridiaceae; g__Saccharofermentans; s__uncultured bacterium	0	34	0	0	0	0	0	0	0	0	0	0	0	0	0	0	0	0	0	0	0	0	0	0
ASV1272	d__Bacteria; p__Bacteroidota; c__Bacteroidia; o__Bacteroidales; f__Rikenellaceae; g__Rikenellaceae RC9 gut group; s__uncultured rumen bacterium	0	0	19	0	0	0	0	0	0	0	0	0	0	0	0	9	0	0	0	0	0	3	0	3
ASV1273	d__Bacteria; p__Bacteroidota; c__Bacteroidia; o__Bacteroidales; f__Prevotellaceae; g__Prevotella; s__uncultured bacterium	0	0	23	0	0	0	0	0	0	0	0	0	0	0	0	0	0	20	0	0	0	0	0	0
ASV1274	d__Bacteria; p__Firmicutes; c__Clostridia; o__Oscillospirales; f__[Eubacterium] coprostanoligenes group; g__norank; s__uncultured bacterium	0	0	28	0	0	0	0	0	0	0	0	10	0	0	0	0	0	9	0	0	0	0	0	0
ASV1275	d__Bacteria; p__Firmicutes; c__Clostridia; o__Oscillospirales; f__Ruminococcaceae; g__CAG-352; s__uncultured bacterium	0	0	17	0	0	0	0	0	0	0	0	0	0	0	0	0	0	0	0	0	0	26	0	0
ASV1276	d__Bacteria; p__Cyanobacteria; c__Vampirivibrionia; o__Gastranaerophilales; f__norank; g__norank; s__uncultured rumen bacterium	0	0	0	10	7	0	0	0	0	3	0	0	0	8	0	0	0	0	0	0	0	0	0	0
ASV1277	d__Bacteria; p__Bacteroidota; c__Bacteroidia; o__Bacteroidales; f__Prevotellaceae; g__Prevotella; s__uncultured bacterium	0	0	0	37	0	0	0	0	0	0	0	0	0	0	0	0	0	0	0	0	0	0	0	0
ASV1278	d__Bacteria; p__Bacteroidota; c__Bacteroidia; o__Bacteroidales; f__Rikenellaceae; g__U29-B03; s__uncultured bacterium	0	0	0	0	0	0	0	0	0	0	21	0	24	0	0	0	0	0	0	0	0	0	0	0
ASV1279	d__Bacteria; p__Firmicutes; c__Clostridia; o__Oscillospirales; f__Oscillospiraceae; g__NK4A214 group; s__uncultured bacterium	0	0	0	0	0	0	0	0	0	0	17	0	23	0	0	0	0	0	0	0	0	0	0	0
ASV1280	d__Bacteria; p__Bacteroidota; c__Bacteroidia; o__Bacteroidales; f__Prevotellaceae; g__Prevotella; s__uncultured rumen bacterium	0	0	0	0	0	0	0	0	0	0	17	0	0	0	0	0	0	10	0	0	0	11	0	0
ASV1281	d__Bacteria; p__Bacteroidota; c__Bacteroidia; o__Bacteroidales; f__Prevotellaceae; g__Prevotellaceae UCG-001; s__uncultured bacterium	0	0	0	0	0	0	0	0	0	0	0	38	0	0	0	0	0	0	0	0	0	0	0	0
ASV1282	d__Bacteria; p__Spirochaetota; c__Spirochaetia; o__Spirochaetales; f__Spirochaetaceae; g__Treponema; s__uncultured rumen bacterium	0	0	0	0	0	0	0	0	0	0	0	0	7	0	0	0	0	20	0	0	0	0	0	9
ASV1283	d__Bacteria; p__Bacteroidota; c__Bacteroidia; o__Bacteroidales; f__Prevotellaceae; g__Prevotella; s__uncultured rumen bacterium	0	0	0	0	0	0	0	0	0	0	0	0	0	0	0	0	0	12	28	0	0	0	0	0
ASV1284	d__Bacteria; p__Bacteroidota; c__Bacteroidia; o__Bacteroidales; f__Prevotellaceae; g__Prevotella; s__uncultured bacterium	0	0	0	0	0	0	0	0	0	0	0	0	0	0	0	0	0	0	0	0	30	0	0	0
ASV1285	d__Bacteria; p__Bacteroidota; c__Bacteroidia; o__Bacteroidales; f__F082; g__norank; s__uncultured bacterium	15	0	0	0	0	0	0	19	0	0	0	0	0	0	0	0	0	0	0	0	0	0	0	0
ASV1286	d__Bacteria; p__Firmicutes; c__Clostridia; o__Lachnospirales; f__Lachnospiraceae; g__Coprococcus	2	0	0	0	19	0	0	0	0	0	0	0	0	0	0	0	0	0	0	0	11	0	0	0
ASV1287	d__Bacteria; p__Firmicutes; c__Clostridia; o__Oscillospirales; f__Oscillospiraceae; g__Colidextribacter	0	8	0	0	0	0	0	0	0	0	0	0	0	0	4	0	0	0	15	12	0	0	0	5
ASV1288	d__Bacteria; p__Bacteroidota; c__Bacteroidia; o__Bacteroidales; f__Prevotellaceae; g__Prevotella; s__uncultured rumen bacterium	0	38	0	0	0	0	0	0	0	0	0	0	0	0	0	0	0	0	0	0	0	0	0	0
ASV1289	d__Bacteria; p__Bacteroidota; c__Bacteroidia; o__Bacteroidales; f__uncultured; g__norank; s__uncultured bacterium	0	11	0	0	0	0	0	0	0	0	0	0	17	0	0	0	0	0	0	12	0	0	0	0
ASV1290	d__Bacteria; p__Bacteroidota; c__Bacteroidia; o__Bacteroidales; f__Prevotellaceae; g__Prevotella; s__uncultured rumen bacterium	0	37	0	0	0	0	0	0	0	0	0	0	0	0	0	0	0	0	0	0	0	0	0	0
ASV1291	d__Bacteria; p__Bacteroidota; c__Bacteroidia; o__Bacteroidales; f__Rikenellaceae; g__Rikenellaceae RC9 gut group; s__uncultured rumen bacterium	0	0	0	5	0	0	0	0	0	0	0	0	3	0	8	0	0	0	0	0	15	0	0	0
ASV1292	d__Bacteria; p__Patescibacteria; c__Saccharimonadia; o__Saccharimonadales; f__Saccharimonadaceae; g__Candidatus Saccharimonas; s__uncultured rumen bacterium	0	0	0	0	28	0	0	0	0	0	0	0	0	0	0	0	0	0	0	0	0	0	0	0
ASV1293	d__Bacteria; p__Bacteroidota; c__Bacteroidia; o__Bacteroidales; f__uncultured; g__norank; s__uncultured bacterium	0	0	0	0	0	0	23	0	0	0	0	0	0	0	0	0	0	0	0	0	0	0	0	19
ASV1294	d__Bacteria; p__Patescibacteria; c__Saccharimonadia; o__Saccharimonadales; f__Saccharimonadaceae; g__Candidatus Saccharimonas; s__uncultured rumen bacterium	0	0	0	0	0	0	0	0	0	0	0	0	0	10	0	0	22	0	0	0	0	0	0	0
ASV1295	d__Bacteria; p__Firmicutes; c__Clostridia; o__Oscillospirales; f__Ruminococcaceae; g__Candidatus Soleaferrea; s__uncultured rumen bacterium	0	0	0	0	0	0	0	0	0	0	0	0	0	0	60	0	0	0	0	0	0	0	0	0
ASV1296	d__Bacteria; p__Bacteroidota; c__Bacteroidia; o__Bacteroidales; f__Prevotellaceae; g__Prevotella; s__uncultured bacterium	0	0	0	0	0	0	0	0	0	0	0	0	0	0	0	42	0	0	0	0	0	0	0	0
ASV1297	d__Bacteria; p__Firmicutes; c__Clostridia; o__Oscillospirales; f__Ruminococcaceae; g__Ruminococcus; s__uncultured rumen bacterium	0	0	0	0	0	0	0	0	0	0	0	0	0	0	0	0	0	14	5	0	0	0	0	15
ASV1298	d__Bacteria; p__Bacteroidota; c__Bacteroidia; o__Bacteroidales; f__Muribaculaceae; g__norank; s__uncultured bacterium	0	0	0	0	0	0	0	0	0	0	0	0	0	0	0	0	0	22	0	26	0	0	0	0
ASV1299	d__Bacteria; p__Firmicutes; c__Clostridia; o__Lachnospirales; f__Lachnospiraceae; g__[Ruminococcus] gauvreauii group; s__uncultured rumen bacterium	0	0	0	0	0	0	0	0	0	0	0	0	0	0	0	0	0	0	0	0	0	20	0	17
ASV1300	d__Bacteria; p__Firmicutes; c__Clostridia; o__Oscillospirales; f__Hungateiclostridiaceae; g__Saccharofermentans; s__uncultured bacterium	6	0	0	0	0	0	0	2	0	0	0	0	13	0	11	0	0	0	0	0	0	0	0	0
ASV1301	d__Bacteria; p__Bacteroidota; c__Bacteroidia; o__Bacteroidales; f__Prevotellaceae; g__Prevotellaceae UCG-001; s__uncultured bacterium	0	0	14	5	0	0	2	0	0	0	0	0	0	0	0	0	0	0	0	0	10	0	0	0
ASV1302	d__Bacteria; p__Bacteroidota; c__Bacteroidia; o__Bacteroidales; f__Muribaculaceae; g__norank; s__uncultured rumen bacterium	0	0	10	0	0	0	0	0	0	0	0	0	30	0	0	0	0	0	0	0	0	0	0	0
ASV1303	d__Bacteria; p__Firmicutes; c__Clostridia; o__Clostridia UCG-014; f__norank; g__norank; s__uncultured bacterium	0	0	0	9	10	0	0	0	0	0	0	0	0	0	0	0	0	8	0	0	4	0	0	0
ASV1304	d__Bacteria; p__Bacteroidota; c__Bacteroidia; o__Bacteroidales; f__Prevotellaceae; g__Prevotella; s__uncultured rumen bacterium	0	0	0	0	33	0	0	0	0	0	0	0	0	0	0	0	0	0	0	0	0	0	0	0
ASV1305	d__Bacteria; p__Firmicutes; c__Clostridia; o__Oscillospirales; f__Ruminococcaceae; g__Ruminococcus; s__uncultured rumen bacterium	0	0	0	0	0	0	0	0	0	9	0	0	0	0	0	0	0	0	0	0	0	28	0	0
ASV1306	d__Bacteria; p__Bacteroidota; c__Bacteroidia; o__Bacteroidales; f__F082; g__norank; s__uncultured bacterium	35	0	0	0	0	0	0	0	0	0	0	0	0	0	0	0	0	0	0	0	0	0	0	0
ASV1307	d__Bacteria; p__Firmicutes; c__Clostridia; o__Christensenellales; f__Christensenellaceae; g__Christensenellaceae R-7 group; s__uncultured rumen bacterium	7	0	0	0	0	0	0	0	0	0	0	0	0	0	0	8	0	0	9	0	13	0	0	0
ASV1308	d__Bacteria; p__Firmicutes; c__Clostridia; o__Lachnospirales; f__Lachnospiraceae; g__Lachnospiraceae NK3A20 group; s__uncultured rumen bacterium	2	11	0	0	1	0	0	0	0	0	9	0	0	4	0	0	8	2	0	0	0	0	0	1
ASV1309	d__Bacteria; p__Firmicutes; c__Clostridia; o__Oscillospirales; f__Hungateiclostridiaceae; g__Saccharofermentans; s__uncultured bacterium	0	8	0	0	0	0	0	0	0	0	0	0	0	0	5	8	0	0	4	12	3	0	0	0
ASV1310	d__Bacteria; p__Firmicutes; c__Clostridia; o__Oscillospirales; f__Hungateiclostridiaceae; g__Ruminiclostridium; s__uncultured bacterium	0	21	13	0	0	0	0	0	0	0	0	0	0	0	0	0	0	0	0	0	0	0	10	0
ASV1311	d__Bacteria; p__Firmicutes; c__Clostridia; o__Christensenellales; f__Christensenellaceae; g__Christensenellaceae R-7 group; s__uncultured bacterium	0	37	0	0	0	0	0	0	0	0	0	0	0	0	0	0	0	0	0	0	0	0	0	0
ASV1312	d__Bacteria; p__Bacteroidota; c__Bacteroidia; o__Bacteroidales; f__p-251-o5; g__norank; s__uncultured bacterium	0	0	30	0	0	0	0	0	0	0	0	0	10	0	7	0	0	0	0	0	0	0	0	0
ASV1313	d__Bacteria; p__Spirochaetota; c__Spirochaetia; o__Spirochaetales; f__Spirochaetaceae; g__Treponema; s__uncultured bacterium	0	0	4	5	0	0	0	0	0	0	0	0	3	0	0	0	0	0	0	0	0	0	0	17
ASV1314	d__Bacteria; p__Firmicutes; c__Clostridia; o__Christensenellales; f__Christensenellaceae; g__Christensenellaceae R-7 group; s__uncultured bacterium	0	0	51	0	0	0	0	0	0	0	0	0	0	0	0	0	0	0	0	0	0	0	0	0
ASV1315	d__Bacteria; p__Firmicutes; c__Clostridia; o__Lachnospirales; f__Lachnospiraceae; g__[Eubacterium] cellulosolvens group; s__[Eubacterium] cellulosolvens 6	0	0	0	0	9	9	15	0	5	0	0	0	0	0	0	0	0	0	0	0	0	0	0	0
ASV1316	d__Bacteria; p__Firmicutes; c__Clostridia; o__Lachnospirales; f__Lachnospiraceae; g__Lachnospiraceae NC2004 group	0	0	0	0	0	7	0	0	0	29	7	0	0	0	0	0	0	0	0	0	0	0	0	0
ASV1317	d__Bacteria; p__Firmicutes; c__Clostridia; o__Christensenellales; f__Christensenellaceae; g__Christensenellaceae R-7 group; s__uncultured rumen bacterium	0	0	0	0	0	0	0	0	0	0	0	0	0	0	0	0	0	0	0	0	14	25	0	0
ASV1318	d__Bacteria; p__Firmicutes; c__Clostridia; o__Oscillospirales; f__UCG-010; g__norank; s__uncultured bacterium	4	8	0	0	0	0	0	0	0	0	0	1	6	0	9	0	0	0	0	0	0	0	10	0
ASV1319	d__Bacteria; p__Firmicutes; c__Clostridia; o__Oscillospirales; f__Ruminococcaceae; g__CAG-352; s__uncultured bacterium	8	0	0	0	0	0	0	5	0	0	0	0	0	0	0	8	0	0	0	0	7	0	0	0
ASV1320	d__Bacteria; p__Firmicutes; c__Bacilli; o__Erysipelotrichales; f__Erysipelotrichaceae; g__[Anaerorhabdus] furcosa group; s__uncultured bacterium	6	0	0	0	0	0	2	0	0	0	0	0	0	0	0	0	0	0	9	4	7	5	0	0
ASV1321	d__Bacteria; p__Bacteroidota; c__Bacteroidia; o__Bacteroidales; f__Paludibacteraceae; g__uncultured; s__uncultured bacterium	8	0	0	8	7	0	0	3	0	0	0	0	0	0	0	0	0	0	0	0	4	0	2	0
ASV1322	d__Bacteria; p__Spirochaetota; c__Spirochaetia; o__Spirochaetales; f__Spirochaetaceae; g__Treponema; s__uncultured rumen bacterium	0	9	0	0	0	0	9	0	0	0	0	0	0	0	0	0	0	9	0	0	9	0	3	0
ASV1323	d__Bacteria; p__Patescibacteria; c__Saccharimonadia; o__Saccharimonadales; f__Saccharimonadaceae; g__Candidatus Saccharimonas; s__uncultured rumen bacterium	0	15	0	0	0	0	0	0	0	0	0	17	0	0	0	0	0	0	0	0	0	0	0	0
ASV1324	d__Bacteria; p__Bacteroidota; c__Bacteroidia; o__Bacteroidales; f__Rikenellaceae; g__Rikenellaceae RC9 gut group; s__uncultured bacterium	0	0	0	0	30	0	0	0	0	0	0	0	0	0	0	0	0	0	0	0	0	0	0	0
ASV1325	d__Bacteria; p__Firmicutes; c__Clostridia; o__Clostridia UCG-014; f__norank; g__norank; s__uncultured bacterium	0	0	0	0	0	38	0	0	0	0	0	0	0	0	0	0	0	0	0	0	0	0	0	0
ASV1326	d__Bacteria; p__Bacteroidota; c__Bacteroidia; o__Bacteroidales; f__Rikenellaceae; g__Rikenellaceae RC9 gut group; s__uncultured rumen bacterium	0	0	0	0	0	0	0	28	0	0	0	0	0	0	0	0	0	0	0	0	0	0	0	0
ASV1327	d__Bacteria; p__Firmicutes; c__Clostridia; o__Lachnospirales; f__Lachnospiraceae; g__[Eubacterium] xylanophilum group; s__uncultured bacterium	0	0	0	0	0	0	0	10	0	0	0	0	0	12	0	0	0	0	0	0	12	0	0	0
ASV1328	d__Bacteria; p__Spirochaetota; c__Spirochaetia; o__Spirochaetales; f__Spirochaetaceae; g__Treponema; s__uncultured bacterium	0	0	0	0	0	0	0	18	0	0	0	0	0	0	0	0	0	0	0	0	0	0	0	12
ASV1329	d__Bacteria; p__Firmicutes; c__Clostridia; o__Christensenellales; f__Christensenellaceae; g__Christensenellaceae R-7 group; s__uncultured rumen bacterium	0	0	0	0	0	0	0	0	0	0	0	0	7	0	14	0	0	8	0	0	0	12	0	0
ASV1330	d__Bacteria; p__Firmicutes; c__Clostridia; o__Lachnospirales; f__Lachnospiraceae; g__Lachnospiraceae UCG-008; s__uncultured rumen bacterium	0	0	0	0	0	0	0	0	0	0	0	0	0	0	37	15	0	0	0	0	0	0	0	0
ASV1331	d__Bacteria; p__Bacteroidota; c__Bacteroidia; o__Bacteroidales; f__Prevotellaceae; g__Prevotella; s__uncultured rumen bacterium	0	0	0	0	0	0	0	0	0	0	0	0	0	0	0	33	0	0	0	0	0	0	0	0
ASV1332	d__Bacteria; p__Firmicutes; c__Bacilli; o__Acholeplasmatales; f__Acholeplasmataceae; g__Anaeroplasma; s__uncultured rumen bacterium	0	0	0	0	0	0	0	0	0	0	0	0	0	0	0	0	0	9	12	0	10	0	0	7
ASV1333	d__Bacteria; p__Bacteroidota; c__Bacteroidia; o__Bacteroidales; f__Prevotellaceae; g__Prevotella; s__uncultured bacterium	0	0	0	0	0	0	0	0	0	0	0	0	0	0	0	0	0	9	0	0	0	11	21	0
ASV1334	d__Bacteria; p__Bacteroidota; c__Bacteroidia; o__Bacteroidales; f__Prevotellaceae; g__Prevotellaceae NK3B31 group; s__uncultured rumen bacterium	0	0	0	0	0	0	0	0	0	0	0	0	0	0	0	0	0	0	0	0	0	29	0	0
ASV1335	d__Bacteria; p__Bacteroidota; c__Bacteroidia; o__Bacteroidales; f__F082; g__norank; s__uncultured rumen bacterium	9	0	0	0	0	0	0	0	0	0	0	0	0	0	0	0	0	11	3	0	3	0	9	2
ASV1336	d__Bacteria; p__Actinobacteriota; c__Coriobacteriia; o__Coriobacteriales; f__Atopobiaceae; g__Olsenella	16	0	0	0	0	0	0	14	0	0	0	0	0	0	0	0	0	0	0	0	0	0	0	0
ASV1337	d__Bacteria; p__Proteobacteria; c__Gammaproteobacteria; o__Enterobacterales; f__Succinivibrionaceae; g__Succinivibrionaceae UCG-002; s__uncultured rumen bacterium	30	0	0	0	0	0	0	0	0	0	0	0	0	0	0	0	0	0	0	0	0	0	0	0
ASV1338	d__Bacteria; p__Firmicutes; c__Clostridia; o__Oscillospirales; f__Ruminococcaceae; g__CAG-352; s__uncultured bacterium	0	16	0	0	0	0	0	0	0	0	0	12	0	0	0	0	0	0	0	0	0	0	0	3
ASV1339	d__Bacteria; p__Bacteroidota; c__Bacteroidia; o__Bacteroidales; f__Prevotellaceae; g__Prevotellaceae UCG-003; s__uncultured rumen bacterium	0	15	0	15	0	0	0	0	0	0	0	0	0	0	0	0	0	0	0	0	0	0	0	0
ASV1340	d__Bacteria; p__Bacteroidota; c__Bacteroidia; o__Bacteroidales; f__Rikenellaceae; g__Rikenellaceae RC9 gut group; s__uncultured rumen bacterium	0	0	50	0	0	0	0	0	0	0	0	0	0	0	0	0	0	0	0	0	0	0	0	0
ASV1341	d__Bacteria; p__Proteobacteria; c__Gammaproteobacteria; o__Enterobacterales; f__Succinivibrionaceae; g__Succinivibrio; s__uncultured bacterium	0	0	0	8	0	0	0	28	0	0	0	0	0	0	0	0	0	0	0	0	0	0	0	0
ASV1342	d__Bacteria; p__Bacteroidota; c__Bacteroidia; o__Bacteroidales; f__Prevotellaceae; g__Prevotella; s__uncultured bacterium	0	0	0	36	0	0	0	0	0	0	0	0	0	0	0	0	0	0	0	0	0	0	0	0
ASV1343	d__Bacteria; p__Bacteroidota; c__Bacteroidia; o__Bacteroidales; f__Prevotellaceae; g__Prevotella; s__uncultured bacterium	0	0	0	10	0	0	0	0	0	0	0	0	0	0	0	0	0	0	0	0	0	0	0	17
ASV1344	d__Bacteria; p__Firmicutes; c__Clostridia; o__Oscillospirales; f__Oscillospiraceae	0	0	0	0	4	0	0	0	0	0	11	0	2	0	16	0	0	0	0	0	0	0	4	6
ASV1345	d__Bacteria; p__Bacteroidota; c__Bacteroidia; o__Bacteroidales; f__uncultured; g__norank; s__uncultured rumen bacterium	0	0	0	0	0	22	0	0	19	0	0	0	0	0	0	0	0	0	0	0	0	0	0	0
ASV1346	d__Bacteria; p__Firmicutes; c__Negativicutes; o__Veillonellales-Selenomonadales; f__Selenomonadaceae; g__Selenomonas	0	0	0	0	0	14	0	0	0	0	0	0	0	22	0	0	0	0	0	0	0	0	0	0
ASV1347	d__Bacteria; p__Bacteroidota; c__Bacteroidia; o__Bacteroidales; f__F082; g__norank; s__uncultured bacterium	0	0	0	0	0	0	0	0	0	0	0	0	0	0	0	9	0	0	7	0	0	13	0	0
ASV1348	d__Bacteria; p__Firmicutes; c__Clostridia; o__Peptostreptococcales-Tissierellales; f__Anaerovoracaceae; g__Family XIII AD3011 group; s__uncultured bacterium	0	0	0	0	0	0	0	0	0	0	0	0	0	0	0	0	0	0	27	0	16	0	0	0
ASV1349	d__Bacteria; p__Bacteroidota; c__Bacteroidia; o__Bacteroidales; f__Prevotellaceae; g__Prevotellaceae UCG-001; s__uncultured bacterium	0	0	0	0	0	0	0	0	0	0	0	0	0	0	0	0	0	0	0	0	33	0	0	0
ASV1350	d__Bacteria; p__Firmicutes; c__Clostridia; o__Oscillospirales; f__Ruminococcaceae; g__CAG-352; s__uncultured rumen bacterium	0	0	0	0	0	0	0	0	0	0	0	0	0	0	0	0	0	0	0	0	14	0	0	18
ASV1351	d__Bacteria; p__Bacteroidota; c__Bacteroidia; o__Bacteroidales; f__Prevotellaceae; g__Prevotellaceae UCG-003; s__uncultured rumen bacterium	23	0	0	9	0	0	0	0	0	0	0	0	0	0	0	0	0	0	0	0	0	0	0	0
ASV1352	d__Bacteria; p__Firmicutes; c__Bacilli; o__RF39; f__norank; g__norank; s__uncultured rumen bacterium	19	0	0	11	0	0	0	0	0	0	0	0	0	0	0	0	0	0	0	0	0	0	0	0
ASV1353	d__Bacteria; p__Bacteroidota; c__Bacteroidia; o__Bacteroidales; f__Rikenellaceae; g__Rikenellaceae RC9 gut group; s__uncultured rumen bacterium	22	0	0	0	9	0	0	0	0	0	0	0	0	0	0	0	0	0	0	0	0	0	0	0
ASV1354	d__Bacteria; p__Firmicutes; c__Clostridia; o__Clostridia UCG-014; f__norank; g__norank; s__uncultured bacterium	33	0	0	0	0	0	0	0	0	0	0	0	0	0	0	0	0	0	0	0	0	0	0	0
ASV1355	d__Bacteria; p__Firmicutes; c__Bacilli; o__Acholeplasmatales; f__Acholeplasmataceae; g__Anaeroplasma; s__uncultured rumen bacterium	3	0	0	8	0	5	0	0	0	0	0	0	0	0	0	6	0	0	0	0	7	0	0	0
ASV1356	d__Bacteria; p__Bacteroidota; c__Bacteroidia; o__Bacteroidales; f__Rikenellaceae; g__Rikenellaceae RC9 gut group; s__uncultured rumen bacterium	0	0	26	0	0	0	0	0	0	0	0	0	14	0	0	0	0	0	0	0	0	0	0	0
ASV1357	d__Bacteria; p__Firmicutes; c__Clostridia; o__Oscillospirales; f__Ruminococcaceae; g__Ruminococcus; s__uncultured rumen bacterium	0	0	21	0	0	0	0	0	0	0	0	0	9	0	0	0	0	0	13	0	0	0	0	0
ASV1358	d__Bacteria; p__Bacteroidota; c__Bacteroidia; o__Bacteroidales; f__Prevotellaceae; g__Prevotella; s__uncultured bacterium	0	0	42	0	0	0	0	0	0	0	0	0	0	0	0	0	0	0	0	0	0	0	0	0
ASV1359	d__Bacteria; p__Firmicutes; c__Clostridia; o__Clostridia vadinBB60 group; f__norank; g__norank; s__uncultured rumen bacterium	0	0	0	6	0	0	0	6	6	3	0	0	0	0	0	3	0	0	0	0	0	0	0	0
ASV1360	d__Bacteria; p__Bacteroidota; c__Bacteroidia; o__Bacteroidales; f__Prevotellaceae; g__Prevotella; s__uncultured rumen bacterium	0	0	0	13	0	0	0	17	0	0	0	0	0	0	0	0	0	0	0	0	0	0	0	0
ASV1361	d__Bacteria; p__Firmicutes; c__Clostridia; o__Clostridia UCG-014; f__norank; g__norank; s__uncultured bacterium	0	0	0	31	0	0	0	0	0	0	0	0	0	0	0	0	0	0	0	0	0	0	0	0
ASV1362	d__Bacteria; p__Firmicutes; c__Clostridia; o__Lachnospirales; f__Lachnospiraceae; g__Oribacterium	0	0	0	11	0	0	0	0	0	0	0	0	0	0	5	0	16	0	0	0	0	0	0	0
ASV1363	d__Bacteria; p__Bacteroidota; c__Bacteroidia; o__Bacteroidales; f__Prevotellaceae; g__Prevotella; s__uncultured rumen bacterium	0	0	0	0	17	0	25	0	0	0	0	0	0	0	0	0	0	0	0	0	0	0	0	0
ASV1364	d__Bacteria; p__Firmicutes; c__Negativicutes; o__Acidaminococcales; f__Acidaminococcaceae; g__Succiniclasticum; s__uncultured rumen bacterium	0	0	0	0	0	0	0	0	0	0	0	0	0	0	0	4	0	0	0	0	27	0	0	0
ASV1365	d__Bacteria; p__Bacteroidota; c__Bacteroidia; o__Bacteroidales; f__uncultured; g__norank; s__uncultured rumen bacterium	0	0	0	0	0	0	0	0	0	0	0	0	0	0	0	0	30	0	0	0	0	0	0	0
ASV1366	d__Bacteria; p__Firmicutes; c__Clostridia; o__Oscillospirales; f__[Eubacterium] coprostanoligenes group; g__norank; s__uncultured bacterium	5	0	0	0	0	3	0	8	0	0	0	0	1	5	0	3	0	0	0	0	3	1	0	0
ASV1367	d__Bacteria; p__Desulfobacterota; c__Desulfuromonadia; o__Bradymonadales; f__norank; g__norank; s__uncultured rumen bacterium	0	6	28	0	0	0	0	0	0	0	0	0	0	0	0	0	0	0	0	0	0	0	0	0
ASV1368	d__Bacteria; p__Bacteroidota; c__Bacteroidia; o__Bacteroidales; f__Prevotellaceae; g__Prevotellaceae UCG-001; s__uncultured bacterium	0	31	0	0	0	0	0	0	0	0	0	0	0	0	0	0	0	0	0	0	0	0	0	0
ASV1369	d__Bacteria; p__Bacteroidota; c__Bacteroidia; o__Bacteroidales; f__Prevotellaceae; g__Prevotella; s__uncultured rumen bacterium	0	0	43	0	0	0	0	0	0	0	0	0	0	0	0	0	0	0	0	0	0	0	0	0
ASV1370	d__Bacteria; p__Firmicutes; c__Clostridia; o__Lachnospirales; f__Lachnospiraceae; g__[Eubacterium] cellulosolvens group; s__[Eubacterium] cellulosolvens 6	0	0	0	12	0	0	0	7	0	0	0	0	0	0	0	5	0	0	0	0	4	0	0	0
ASV1371	d__Bacteria; p__Bacteroidota; c__Bacteroidia; o__Bacteroidales; f__Prevotellaceae; g__Prevotella	0	0	0	23	0	0	0	0	0	0	0	0	0	5	0	0	0	0	0	0	0	0	0	0
ASV1372	d__Bacteria; p__Firmicutes; c__Clostridia; o__Lachnospirales; f__Lachnospiraceae; g__Agathobacter	0	0	0	14	0	0	24	0	0	0	0	0	0	0	0	0	0	0	0	0	0	0	0	0
ASV1373	d__Bacteria; p__Firmicutes; c__Clostridia; o__Lachnospirales; f__Lachnospiraceae; g__[Eubacterium] ruminantium group	0	0	0	0	0	0	0	30	0	0	0	0	0	0	0	0	0	0	0	0	0	0	0	0
ASV1374	d__Bacteria; p__Bacteroidota; c__Bacteroidia; o__Bacteroidales; f__F082; g__norank; s__uncultured bacterium	0	0	0	0	0	0	0	0	0	0	0	0	37	0	0	0	0	0	0	0	0	0	0	0
ASV1375	d__Bacteria; p__Bacteroidota; c__Bacteroidia; o__Bacteroidales; f__F082; g__norank; s__uncultured bacterium	0	0	0	0	0	0	0	0	0	0	0	0	0	0	38	10	0	0	0	0	0	0	0	0
ASV1376	d__Bacteria; p__Firmicutes; c__Clostridia; o__Clostridia UCG-014; f__norank; g__norank; s__uncultured bacterium	36	0	0	0	0	0	0	0	0	0	0	0	0	0	0	0	0	0	0	0	0	0	0	0
ASV1377	d__Bacteria; p__Firmicutes; c__Clostridia; o__Lachnospirales; f__Lachnospiraceae; g__Butyrivibrio; s__uncultured rumen bacterium	31	0	0	0	0	0	0	0	0	0	0	0	0	0	0	0	0	0	0	0	0	0	0	0
ASV1378	d__Bacteria; p__Actinobacteriota; c__Coriobacteriia; o__Coriobacteriales; f__Atopobiaceae; g__Olsenella; s__uncultured bacterium	0	18	0	0	0	0	0	0	0	0	10	6	0	0	0	0	0	0	0	0	0	0	0	0
ASV1379	d__Bacteria; p__Proteobacteria; c__Alphaproteobacteria; o__Rickettsiales; f__Mitochondria; g__norank; s__uncultured rumen bacterium	0	18	0	0	0	0	0	0	0	0	0	0	0	0	24	0	0	0	0	0	0	0	0	0
ASV1380	d__Bacteria; p__Firmicutes; c__Clostridia; o__Lachnospirales; f__Lachnospiraceae; g__[Eubacterium] ruminantium group	0	29	0	0	0	0	0	0	0	0	0	0	0	0	0	0	0	0	0	0	0	0	0	0
ASV1381	d__Bacteria; p__Patescibacteria; c__Saccharimonadia; o__Saccharimonadales; f__Saccharimonadaceae; g__Candidatus Saccharimonas; s__uncultured rumen bacterium	0	0	42	0	0	0	0	0	0	0	0	0	0	0	0	0	0	0	0	0	0	0	0	0
ASV1382	d__Bacteria; p__Firmicutes; c__Clostridia; o__Lachnospirales; f__Lachnospiraceae; g__Lachnospiraceae UCG-008; s__uncultured bacterium	0	0	0	0	4	0	0	0	0	0	22	0	0	0	0	0	0	9	0	0	0	0	0	0
ASV1383	d__Bacteria; p__Bacteroidota; c__Bacteroidia; o__Bacteroidales; f__Prevotellaceae; g__Prevotella; s__uncultured bacterium	0	0	0	0	10	0	0	0	0	0	0	0	0	0	0	0	0	0	0	0	0	12	0	4
ASV1384	d__Bacteria; p__Bacteroidota; c__Bacteroidia; o__Bacteroidales; f__Prevotellaceae; g__Prevotella; s__uncultured rumen bacterium	0	0	0	0	0	0	18	0	0	0	0	0	0	0	0	0	0	17	0	0	0	0	0	0
ASV1385	d__Bacteria; p__Patescibacteria; c__Saccharimonadia; o__Saccharimonadales; f__Saccharimonadaceae; g__Candidatus Saccharimonas; s__uncultured rumen bacterium	0	0	0	0	0	0	0	0	0	0	0	0	0	0	53	0	0	0	0	0	0	0	0	0
ASV1386	d__Bacteria; p__Bacteroidota; c__Bacteroidia; o__Bacteroidales; f__Prevotellaceae; g__Prevotella; s__uncultured rumen bacterium	0	0	0	0	0	0	0	0	0	0	0	0	0	0	0	12	0	0	22	0	0	0	0	0
ASV1387	d__Bacteria; p__Bacteroidota; c__Bacteroidia; o__Bacteroidales; f__F082; g__norank; s__uncultured bacterium	0	0	0	0	0	0	0	0	0	0	0	0	0	0	0	35	0	0	0	0	0	0	0	0
ASV1388	d__Bacteria; p__Bacteroidota; c__Bacteroidia; o__Bacteroidales; f__Prevotellaceae; g__Prevotellaceae UCG-001; s__uncultured bacterium	0	0	0	0	0	0	0	0	0	0	0	0	0	0	0	29	0	0	0	0	0	0	0	0
ASV1389	d__Bacteria; p__Bacteroidota; c__Bacteroidia; o__Bacteroidales; f__Prevotellaceae; g__Prevotella; s__uncultured bacterium	0	0	0	0	0	0	0	0	0	0	0	0	0	0	0	0	37	0	0	0	0	0	0	0
ASV1390	d__Bacteria; p__Firmicutes; c__Clostridia; o__Lachnospirales; f__Lachnospiraceae; g__Acetitomaculum; s__uncultured bacterium	0	0	0	0	0	0	0	0	0	0	0	0	0	0	0	0	0	30	0	0	0	0	0	0
ASV1391	d__Bacteria; p__Bacteroidota; c__Bacteroidia; o__Bacteroidales; f__Prevotellaceae; g__Prevotellaceae UCG-003; s__uncultured rumen bacterium	0	0	0	0	0	0	0	0	0	0	0	0	0	0	0	0	0	0	0	46	0	0	0	0
ASV1392	d__Bacteria; p__Patescibacteria; c__Saccharimonadia; o__Saccharimonadales; f__Saccharimonadaceae; g__Candidatus Saccharimonas; s__uncultured rumen bacterium	0	0	0	0	0	0	0	0	0	0	0	0	0	0	0	0	0	0	0	0	21	0	0	0
ASV1393	d__Bacteria; p__Bacteroidota; c__Bacteroidia; o__Bacteroidales; f__F082; g__norank; s__uncultured bacterium	0	0	0	0	0	0	0	0	0	0	0	0	0	0	0	0	0	0	0	0	0	27	0	0
ASV1394	d__Bacteria; p__Bacteroidota; c__Bacteroidia; o__Bacteroidales; f__F082; g__norank; s__uncultured rumen bacterium	0	0	0	0	0	0	0	0	0	0	0	0	0	0	0	0	0	0	0	0	0	0	30	8
ASV1395	d__Bacteria; p__Firmicutes; c__Clostridia; o__Oscillospirales; f__Ruminococcaceae; g__Ruminococcus; s__Ruminococcus albus	35	0	0	0	0	0	0	0	0	0	0	0	0	0	0	0	0	0	0	0	0	0	0	0
ASV1396	d__Bacteria; p__Bacteroidota; c__Bacteroidia; o__Bacteroidales; f__F082; g__norank; s__uncultured bacterium	0	30	0	0	0	0	0	0	0	0	0	0	0	0	0	0	0	0	0	0	0	2	0	0
ASV1397	d__Bacteria; p__Bacteroidota; c__Bacteroidia; o__Bacteroidales; f__Rikenellaceae; g__Rikenellaceae RC9 gut group; s__uncultured bacterium	0	17	0	0	0	0	0	0	0	0	0	0	0	0	0	0	0	0	0	0	0	0	15	0
ASV1398	d__Bacteria; p__Firmicutes; c__Clostridia; o__Lachnospirales; f__Defluviitaleaceae; g__Defluviitaleaceae UCG-011; s__uncultured bacterium	0	3	0	0	0	0	0	0	0	0	0	0	0	0	21	0	0	0	4	0	8	0	3	0
ASV1399	d__Bacteria; p__Bacteroidota; c__Bacteroidia; o__Bacteroidales; f__Muribaculaceae; g__norank; s__uncultured rumen bacterium	0	0	37	0	0	0	0	0	0	0	0	0	0	0	0	0	0	0	0	0	0	0	0	0
ASV1400	d__Bacteria; p__Bacteroidota; c__Bacteroidia; o__Bacteroidales; f__Prevotellaceae; g__Prevotella; s__uncultured rumen bacterium	0	0	12	0	11	0	0	0	0	0	0	0	0	0	0	0	0	0	0	0	0	0	0	0
ASV1401	d__Bacteria; p__Firmicutes; c__Clostridia; o__Lachnospirales; f__Lachnospiraceae; g__[Eubacterium] ruminantium group; s__uncultured bacterium	0	0	0	4	0	0	0	0	0	0	0	0	0	0	0	0	0	6	0	0	7	6	0	4
ASV1402	d__Bacteria; p__Firmicutes; c__Clostridia; o__Oscillospirales; f__Ruminococcaceae; g__CAG-352; s__uncultured bacterium	0	0	0	0	0	0	0	35	0	0	0	0	0	0	0	0	0	0	0	0	0	0	0	0
ASV1403	d__Bacteria; p__Firmicutes; c__Clostridia; o__Lachnospirales; f__Lachnospiraceae; g__[Eubacterium] ruminantium group; s__uncultured rumen bacterium	0	0	0	0	0	0	0	0	0	0	0	27	0	0	0	0	0	0	0	0	0	0	0	0
ASV1404	d__Bacteria; p__Proteobacteria; c__Alphaproteobacteria; o__Rickettsiales; f__Mitochondria; g__norank; s__uncultured rumen bacterium	0	0	0	0	0	0	0	0	0	0	0	0	0	0	52	0	0	0	0	0	0	0	0	0
ASV1405	d__Bacteria; p__Bacteroidota; c__Bacteroidia; o__Bacteroidales; f__Prevotellaceae; g__Prevotella; s__uncultured rumen bacterium	0	0	0	0	0	0	0	0	0	0	0	0	0	0	0	0	0	0	42	0	0	0	0	0
ASV1406	d__Bacteria; p__Firmicutes; c__Clostridia; o__Christensenellales; f__Christensenellaceae; g__Christensenellaceae R-7 group; s__uncultured rumen bacterium	0	0	0	0	0	0	0	0	0	0	0	0	0	0	0	0	0	0	0	47	0	0	0	0
ASV1407	d__Bacteria; p__Firmicutes; c__Clostridia; o__Clostridia UCG-014; f__norank; g__norank	0	0	0	0	0	0	0	0	0	0	0	0	0	0	0	0	0	0	0	0	18	0	0	0
ASV1408	d__Bacteria; p__Bacteroidota; c__Bacteroidia; o__Bacteroidales; f__Muribaculaceae; g__norank; s__uncultured bacterium	23	0	0	0	2	0	0	0	0	0	0	0	0	0	0	0	0	0	0	0	0	0	0	0
ASV1409	d__Bacteria; p__Firmicutes; c__Clostridia; o__Lachnospirales; f__Lachnospiraceae; g__[Eubacterium] ruminantium group; s__uncultured rumen bacterium	0	0	37	0	0	0	0	0	0	0	0	0	0	0	0	0	0	0	0	0	0	0	0	0
ASV1410	d__Bacteria; p__Bacteroidota; c__Bacteroidia; o__Bacteroidales; f__Prevotellaceae; g__Prevotellaceae UCG-003; s__uncultured bacterium	0	0	21	0	0	0	0	0	0	0	0	0	0	0	0	0	0	0	0	0	3	9	0	0
ASV1411	d__Bacteria; p__Bacteroidota; c__Bacteroidia; o__Bacteroidales; f__Prevotellaceae; g__Prevotella; s__uncultured bacterium	0	0	0	12	7	0	0	8	0	0	0	0	0	0	0	0	0	0	0	0	0	0	0	0
ASV1412	d__Bacteria; p__Bacteroidota; c__Bacteroidia; o__Bacteroidales; f__Rikenellaceae; g__Rikenellaceae RC9 gut group; s__uncultured rumen bacterium	0	0	0	18	0	0	0	0	0	0	0	0	13	0	0	0	0	0	0	0	0	0	0	0
ASV1413	d__Bacteria; p__Bacteroidota; c__Bacteroidia; o__Bacteroidales; f__Prevotellaceae; g__Prevotella; s__uncultured rumen bacterium	0	0	0	14	0	0	0	0	0	15	0	0	0	0	0	0	0	0	0	0	0	0	0	0
ASV1414	d__Bacteria; p__Bacteroidota; c__Bacteroidia; o__Bacteroidales; f__Prevotellaceae; g__Prevotella; s__uncultured bacterium	0	0	0	10	0	0	0	0	0	0	0	0	0	0	0	0	0	4	0	0	12	0	0	0
ASV1415	d__Bacteria; p__Bacteroidota; c__Bacteroidia; o__Bacteroidales; f__Bacteroidales RF16 group; g__norank; s__uncultured rumen bacterium	0	0	0	0	0	36	0	0	0	0	0	0	0	0	0	0	0	0	0	0	0	0	0	0
ASV1416	d__Bacteria; p__Bacteroidota; c__Bacteroidia; o__Bacteroidales; f__Prevotellaceae; g__Prevotella; s__uncultured rumen bacterium	0	0	0	0	0	31	0	0	0	0	0	0	0	0	0	0	0	0	0	0	0	0	0	0
ASV1417	d__Bacteria; p__Bacteroidota; c__Bacteroidia; o__Bacteroidales; f__Prevotellaceae; g__Prevotella; s__uncultured rumen bacterium	0	0	0	0	0	0	21	0	0	0	0	0	0	0	0	0	0	0	0	0	0	16	0	0
ASV1418	d__Bacteria; p__Firmicutes; c__Clostridia; o__Oscillospirales; f__Oscillospiraceae; g__UCG-002; s__uncultured bacterium	0	0	0	0	0	0	0	0	40	0	0	0	0	0	0	0	0	0	0	0	0	0	0	0
ASV1419	d__Bacteria; p__Bacteroidota; c__Bacteroidia; o__Bacteroidales; f__Prevotellaceae; g__Prevotella; s__uncultured rumen bacterium	0	0	0	0	0	0	0	0	38	0	0	0	0	0	0	0	0	0	0	0	0	0	0	0
ASV1420	d__Bacteria; p__Proteobacteria; c__Alphaproteobacteria; o__Paracaedibacterales; f__Paracaedibacteraceae; g__uncultured; s__uncultured rumen bacterium	0	0	0	0	0	0	0	0	0	0	3	2	0	0	38	0	0	0	0	0	0	0	0	0
ASV1421	d__Bacteria; p__Firmicutes; c__Clostridia; o__Oscillospirales; f__UCG-010; g__norank; s__uncultured rumen bacterium	0	0	0	0	0	0	0	0	0	0	34	0	0	0	0	0	0	0	0	0	0	0	0	0
ASV1422	d__Bacteria; p__Elusimicrobiota; c__Endomicrobia; o__Endomicrobiales; f__Endomicrobiaceae; g__Endomicrobium; s__uncultured rumen bacterium	0	0	0	0	0	0	0	0	0	0	0	0	12	0	0	0	0	17	0	0	0	0	0	0
ASV1423	d__Bacteria; p__Firmicutes; c__Clostridia; o__Oscillospirales; f__Ruminococcaceae; g__norank; s__uncultured rumen bacterium	0	0	0	0	0	0	0	0	0	0	0	0	0	6	0	10	0	0	18	0	0	0	0	0
ASV1424	d__Bacteria; p__Bacteroidota; c__Bacteroidia; o__Bacteroidales; f__Prevotellaceae; g__Prevotella; s__uncultured rumen bacterium	0	0	0	0	0	0	0	0	0	0	0	0	0	0	0	0	0	14	0	0	0	23	0	0
ASV1425	d__Bacteria; p__Bacteroidota; c__Bacteroidia; o__Bacteroidales; f__Prevotellaceae; g__Prevotella; s__uncultured rumen bacterium	0	0	0	0	0	0	0	0	0	0	0	0	0	0	0	0	0	0	0	0	0	27	0	0
ASV1426	d__Bacteria; p__Bacteroidota; c__Bacteroidia; o__Bacteroidales; f__Muribaculaceae; g__norank; s__uncultured bacterium	5	0	0	0	0	0	0	0	0	0	8	2	6	0	0	0	0	3	0	0	8	0	0	2
ASV1427	d__Bacteria; p__Firmicutes; c__Clostridia; o__Lachnospirales; f__Lachnospiraceae; g__Lachnospiraceae NK3A20 group; s__uncultured rumen bacterium	0	0	10	0	0	6	0	0	9	0	0	6	0	0	8	0	0	0	0	0	0	0	0	0
ASV1428	d__Bacteria; p__Bacteroidota; c__Bacteroidia; o__Bacteroidales; f__Bacteroidales RF16 group; g__norank; s__uncultured bacterium	0	0	0	4	0	0	0	0	0	0	0	0	0	0	0	0	0	0	0	0	19	0	0	0
ASV1429	d__Bacteria; p__Firmicutes; c__Clostridia; o__Oscillospirales; f__UCG-010; g__norank; s__uncultured bacterium	0	0	0	0	0	10	0	14	0	0	0	0	0	0	0	0	7	0	0	0	0	0	0	0
ASV1430	d__Bacteria; p__Firmicutes; c__Clostridia; o__Oscillospirales; f__[Clostridium] methylpentosum group; g__norank; s__uncultured bacterium	0	0	0	0	0	0	0	0	0	0	0	0	0	0	50	0	0	0	0	0	0	0	0	0
ASV1431	d__Bacteria; p__Bacteroidota; c__Bacteroidia; o__Bacteroidales; f__Prevotellaceae; g__Prevotella; s__uncultured rumen bacterium	0	0	0	0	0	0	0	0	0	0	0	0	0	0	0	32	0	0	0	0	0	0	0	0
ASV1432	d__Bacteria; p__Patescibacteria; c__Gracilibacteria; o__Absconditabacteriales (SR1); f__norank; g__norank	0	0	0	0	0	0	0	0	0	0	0	0	0	0	0	0	0	28	0	0	0	0	0	0
ASV1433	d__Bacteria; p__Firmicutes; c__Clostridia; o__Lachnospirales; f__Lachnospiraceae; g__uncultured; s__uncultured bacterium	0	0	0	0	0	0	0	0	0	0	0	0	0	0	0	0	0	0	0	16	0	2	0	12
ASV1434	d__Bacteria; p__Firmicutes; c__Clostridia; o__Lachnospirales; f__Lachnospiraceae; g__Lachnospiraceae NK3A20 group; s__uncultured rumen bacterium	4	0	0	0	0	0	0	0	0	0	0	15	0	0	0	0	0	0	0	0	10	0	0	0
ASV1435	d__Bacteria; p__Bacteroidota; c__Bacteroidia; o__Bacteroidales; f__Prevotellaceae; g__Prevotella; s__uncultured rumen bacterium	0	17	0	0	0	0	0	0	0	0	0	0	0	0	0	0	0	0	0	18	0	0	0	0
ASV1436	d__Bacteria; p__Bacteroidota; c__Bacteroidia; o__Bacteroidales; f__Prevotellaceae; g__Prevotella; s__uncultured bacterium	0	9	0	7	0	10	0	0	0	7	0	0	0	0	0	0	0	0	0	0	0	0	0	0
ASV1437	d__Bacteria; p__Firmicutes; c__Clostridia; o__Oscillospirales; f__Hungateiclostridiaceae; g__Saccharofermentans; s__uncultured rumen bacterium	0	27	0	0	0	0	0	0	0	0	0	0	0	0	0	0	0	0	0	0	0	0	0	0
ASV1438	d__Bacteria; p__Bacteroidota; c__Bacteroidia; o__Bacteroidales; f__Prevotellaceae; g__Prevotellaceae UCG-001; s__uncultured bacterium	0	33	0	0	0	0	0	0	0	0	0	0	0	0	0	0	0	0	0	0	0	0	0	0
ASV1439	d__Bacteria; p__Bacteroidota; c__Bacteroidia; o__Bacteroidales; f__Prevotellaceae; g__Prevotella; s__uncultured rumen bacterium	0	28	0	0	0	0	0	0	0	0	0	0	0	0	0	0	0	0	0	0	0	0	0	0
ASV1440	d__Bacteria; p__Bacteroidota; c__Bacteroidia; o__Bacteroidales; f__Prevotellaceae; g__Prevotella; s__uncultured rumen bacterium	0	0	10	0	11	0	0	0	0	0	0	0	0	0	0	0	0	0	0	0	5	8	0	0
ASV1441	d__Bacteria; p__Cyanobacteria; c__Vampirivibrionia; o__Gastranaerophilales; f__norank; g__norank; s__uncultured rumen bacterium	0	0	0	0	11	0	0	19	0	0	0	0	0	0	0	0	0	0	0	0	0	0	0	0
ASV1442	d__Bacteria; p__Proteobacteria; c__Gammaproteobacteria; o__Burkholderiales; f__Comamonadaceae; g__Comamonas; s__uncultured bacterium	0	0	0	0	0	0	16	0	0	14	0	0	0	5	0	0	3	0	0	0	0	0	0	0
ASV1443	d__Bacteria; p__Cyanobacteria; c__Vampirivibrionia; o__Gastranaerophilales; f__norank; g__norank; s__uncultured bacterium	0	0	0	0	0	0	0	23	0	0	0	0	0	0	0	0	0	0	0	0	0	0	0	0
ASV1444	d__Bacteria; p__Bacteroidota; c__Bacteroidia; o__Bacteroidales; f__Prevotellaceae; g__Prevotella; s__uncultured rumen bacterium	0	0	0	0	0	0	0	16	0	0	0	0	0	0	0	0	0	0	0	0	0	0	0	10
ASV1445	d__Bacteria; p__Firmicutes; c__Clostridia; o__Oscillospirales; f__[Eubacterium] coprostanoligenes group; g__norank; s__uncultured rumen bacterium	0	0	0	0	0	0	0	2	0	0	0	0	21	0	0	0	0	0	0	0	0	0	0	0
ASV1446	d__Bacteria; p__Firmicutes; c__Clostridia; o__Oscillospirales; f__Ruminococcaceae; g__Ruminococcus; s__uncultured rumen bacterium	0	0	0	0	0	0	0	0	0	0	0	0	0	0	0	16	0	0	0	0	0	0	0	13
ASV1447	d__Bacteria; p__Firmicutes; c__Clostridia; o__Christensenellales; f__Christensenellaceae; g__Christensenellaceae R-7 group; s__uncultured bacterium	0	6	0	0	0	0	0	0	0	0	0	0	0	0	0	0	0	0	0	0	0	9	0	10
ASV1448	d__Bacteria; p__Bacteroidota; c__Bacteroidia; o__Bacteroidales; f__Rikenellaceae; g__Rikenellaceae RC9 gut group; s__uncultured bacterium	0	13	0	0	0	0	0	0	0	0	0	5	0	0	0	0	0	0	0	0	0	0	19	0
ASV1449	d__Bacteria; p__Bacteroidota; c__Bacteroidia; o__Bacteroidales; f__Prevotellaceae; g__Prevotellaceae NK3B31 group; s__uncultured rumen bacterium	0	6	0	0	0	0	0	0	0	0	18	0	0	0	15	0	0	0	0	0	0	0	0	0
ASV1450	d__Bacteria; p__Firmicutes; c__Clostridia; o__Lachnospirales; f__Lachnospiraceae; g__uncultured; s__uncultured rumen bacterium	0	11	0	0	0	0	0	0	0	0	0	0	0	0	0	0	0	0	0	25	0	0	0	0
ASV1451	d__Bacteria; p__Firmicutes; c__Clostridia; o__Christensenellales; f__Christensenellaceae; g__Christensenellaceae R-7 group; s__uncultured rumen bacterium	0	19	0	0	0	0	0	0	0	0	0	0	0	0	0	0	0	0	14	0	0	0	0	0
ASV1452	d__Bacteria; p__Bacteroidota; c__Bacteroidia; o__Bacteroidales; f__Rikenellaceae; g__Rikenellaceae RC9 gut group; s__uncultured bacterium	0	0	36	0	0	0	0	0	0	0	0	0	0	0	0	0	0	0	0	0	0	0	0	0
ASV1453	d__Bacteria; p__Elusimicrobiota; c__Endomicrobia; o__Endomicrobiales; f__Endomicrobiaceae; g__Endomicrobium; s__uncultured rumen bacterium	0	0	26	0	0	0	0	0	0	0	0	6	0	0	0	0	0	0	0	0	0	0	0	0
ASV1454	d__Bacteria; p__Firmicutes; c__Clostridia; o__Oscillospirales; f__Ruminococcaceae; g__Ruminococcus; s__uncultured rumen bacterium	0	0	37	0	0	0	0	0	0	0	0	0	0	0	0	0	0	0	0	0	0	0	0	0
ASV1455	d__Bacteria; p__Bacteroidota; c__Bacteroidia; o__Bacteroidales; f__Prevotellaceae; g__Prevotella; s__uncultured bacterium	0	0	33	0	0	0	0	0	0	0	0	0	0	0	0	0	0	0	0	0	0	0	0	0
ASV1456	d__Bacteria; p__Fibrobacterota; c__Fibrobacteria; o__Fibrobacterales; f__Fibrobacteraceae; g__Fibrobacter	0	0	27	0	0	0	0	0	0	0	0	0	0	0	0	0	0	0	0	0	0	6	0	0
ASV1457	d__Bacteria; p__Firmicutes; c__Clostridia; o__Oscillospirales; f__Ruminococcaceae; g__Ruminococcus; s__uncultured rumen bacterium	0	0	0	9	0	0	0	0	0	0	0	0	0	0	0	0	0	0	0	0	12	0	0	0
ASV1458	d__Bacteria; p__Bacteroidota; c__Bacteroidia; o__Bacteroidales; f__F082; g__norank; s__uncultured rumen bacterium	0	0	0	0	0	0	0	0	0	0	11	0	20	0	0	0	0	0	0	0	0	0	0	0
ASV1459	d__Bacteria; p__Bacteroidota; c__Bacteroidia; o__Bacteroidales; f__Rikenellaceae; g__Rikenellaceae RC9 gut group; s__uncultured rumen bacterium	0	0	0	0	0	0	0	0	0	0	29	0	0	0	0	0	0	0	0	0	0	0	0	0
ASV1460	d__Bacteria; p__Bacteroidota; c__Bacteroidia; o__Bacteroidales; f__p-251-o5; g__norank; s__uncultured rumen bacterium	0	0	0	0	0	0	0	0	0	0	0	16	12	0	0	0	0	0	0	0	0	0	0	0
ASV1461	d__Bacteria; p__Bacteroidota; c__Bacteroidia; o__Bacteroidales; f__Muribaculaceae; g__norank; s__uncultured rumen bacterium	0	0	0	0	0	0	0	0	0	0	0	7	0	0	39	0	0	0	0	0	0	0	0	0
ASV1462	d__Bacteria; p__Firmicutes; c__Clostridia; o__Oscillospirales; f__Oscillospiraceae; g__NK4A214 group; s__uncultured bacterium	0	0	0	0	0	0	0	0	0	0	0	30	0	0	0	0	0	0	0	0	0	0	0	0
ASV1463	d__Bacteria; p__Bacteroidota; c__Bacteroidia; o__Bacteroidales; f__F082; g__norank; s__uncultured bacterium	0	0	0	0	0	0	0	0	0	0	0	0	15	0	0	0	0	10	0	0	0	0	0	0
ASV1464	d__Bacteria; p__Spirochaetota; c__Spirochaetia; o__Spirochaetales; f__Spirochaetaceae; g__Treponema	0	0	0	0	0	0	0	0	0	0	0	0	0	0	0	0	24	0	0	0	0	0	0	0
ASV1465	d__Bacteria; p__Bacteroidota; c__Bacteroidia; o__Bacteroidales; f__F082; g__norank; s__uncultured bacterium	0	0	0	0	0	0	0	0	0	0	0	0	0	0	0	0	0	0	40	0	0	0	0	0
ASV1466	d__Bacteria; p__Firmicutes; c__Clostridia; o__Christensenellales; f__Christensenellaceae; g__Christensenellaceae R-7 group; s__uncultured rumen bacterium	0	0	0	0	0	0	0	0	0	0	0	0	0	0	0	0	0	0	22	0	0	11	0	0
ASV1467	d__Bacteria; p__Firmicutes; c__Clostridia; o__Clostridia UCG-014; f__norank; g__norank	0	0	0	0	0	0	0	0	0	0	0	0	0	0	0	0	0	0	0	0	18	0	0	0
ASV1468	d__Bacteria; p__Bacteroidota; c__Bacteroidia; o__Bacteroidales; f__Prevotellaceae; g__Prevotellaceae UCG-003; s__uncultured bacterium	0	0	0	0	0	0	0	0	0	0	0	0	0	0	0	0	0	0	0	0	23	0	0	0
ASV1469	d__Bacteria; p__Bacteroidota; c__Bacteroidia; o__Bacteroidales; f__p-251-o5; g__norank; s__uncultured rumen bacterium	0	0	0	0	0	0	0	0	0	0	0	0	0	0	0	0	0	0	0	0	0	0	44	0
ASV1470	d__Bacteria; p__Bacteroidota; c__Bacteroidia; o__Bacteroidales; f__Prevotellaceae; g__Prevotella	20	0	0	0	0	0	0	0	0	0	0	0	0	8	0	0	0	0	0	0	0	0	0	0
ASV1471	d__Bacteria; p__Firmicutes; c__Negativicutes; o__Veillonellales-Selenomonadales; f__Selenomonadaceae; g__Selenomonas	0	6	0	0	3	0	0	0	0	0	7	9	0	0	3	0	0	0	0	0	0	0	0	0
ASV1472	d__Bacteria; p__Firmicutes; c__Clostridia; o__Lachnospirales; f__Lachnospiraceae; g__Butyrivibrio; s__uncultured rumen bacterium	0	0	38	0	0	0	0	0	0	0	0	0	0	0	0	0	0	0	0	0	0	0	0	0
ASV1473	d__Bacteria; p__Firmicutes; c__Bacilli; o__Erysipelotrichales; f__Erysipelatoclostridiaceae; g__UCG-004; s__uncultured rumen bacterium	0	0	0	6	0	0	0	0	0	0	0	0	7	0	17	0	0	0	0	0	0	0	0	0
ASV1474	d__Bacteria; p__Firmicutes; c__Bacilli; o__Erysipelotrichales; f__Erysipelatoclostridiaceae; g__UCG-004; s__uncultured rumen bacterium	0	0	0	5	3	2	0	8	0	0	0	0	0	0	0	0	0	0	0	0	5	0	0	0
ASV1475	d__Bacteria; p__Firmicutes; c__Clostridia; o__Clostridia UCG-014; f__norank; g__norank; s__uncultured rumen bacterium	0	0	0	10	13	0	0	0	0	0	0	0	0	0	0	0	0	0	0	0	0	0	0	0
ASV1476	d__Bacteria; p__Cyanobacteria; c__Vampirivibrionia; o__Gastranaerophilales; f__norank; g__norank; s__uncultured bacterium	0	0	0	0	18	0	0	0	0	0	0	0	0	0	0	0	0	0	0	0	0	0	0	0
ASV1477	d__Bacteria; p__Firmicutes; c__Clostridia; o__Lachnospirales; f__Lachnospiraceae; g__Lachnospiraceae NK3A20 group; s__uncultured rumen bacterium	0	0	0	0	0	0	0	0	0	0	21	0	0	0	0	0	0	0	0	0	10	0	0	0
ASV1478	d__Bacteria; p__Bacteroidota; c__Bacteroidia; o__Bacteroidales; f__Prevotellaceae; g__Prevotellaceae UCG-001; s__uncultured bacterium	0	0	0	0	0	0	0	0	0	0	0	35	0	0	0	0	0	0	0	0	0	0	0	0
ASV1479	d__Bacteria; p__Firmicutes; c__Clostridia; o__Oscillospirales; f__Ruminococcaceae; g__Ruminococcus; s__uncultured rumen bacterium	0	0	0	0	0	0	0	0	0	0	0	0	0	0	47	0	0	0	0	0	0	0	0	0
ASV1480	d__Bacteria; p__Bacteroidota; c__Bacteroidia; o__Bacteroidales; f__Prevotellaceae; g__Prevotella; s__uncultured rumen bacterium	0	0	0	0	0	0	0	0	0	0	0	0	0	0	0	20	0	0	0	0	9	0	0	0
ASV1481	d__Bacteria; p__Bacteroidota; c__Bacteroidia; o__Bacteroidales; f__Prevotellaceae; g__Prevotellaceae NK3B31 group; s__uncultured rumen bacterium	0	0	0	0	0	0	0	0	0	0	0	0	0	0	0	7	0	14	0	0	0	0	0	10
ASV1482	d__Bacteria; p__Bacteroidota; c__Bacteroidia; o__Bacteroidales; f__F082; g__norank; s__uncultured rumen bacterium	0	0	0	0	0	0	0	0	0	0	0	0	0	0	0	0	0	8	0	0	0	0	30	0
ASV1483	d__Bacteria; p__Fibrobacterota; c__Fibrobacteria; o__Fibrobacterales; f__Fibrobacteraceae; g__Fibrobacter; s__uncultured rumen bacterium	0	0	0	0	0	0	0	0	0	0	0	0	0	0	0	0	0	0	0	0	0	30	0	0
ASV1484	d__Bacteria; p__Bacteroidota; c__Bacteroidia; o__Bacteroidales; f__Prevotellaceae; g__Prevotella; s__uncultured rumen bacterium	0	0	0	0	0	0	0	0	0	0	0	0	0	0	0	0	0	0	0	0	0	10	23	0
ASV1485	d__Bacteria; p__Bacteroidota; c__Bacteroidia; o__Bacteroidales; f__Prevotellaceae; g__Prevotella; s__uncultured rumen bacterium	0	0	0	0	0	0	0	0	0	0	0	0	0	0	0	0	0	0	0	0	0	30	0	0
ASV1486	Unclassified	0	0	0	0	0	0	0	0	0	0	0	0	0	0	0	0	0	0	0	0	0	0	0	28
ASV1487	d__Bacteria; p__Patescibacteria; c__Saccharimonadia; o__Saccharimonadales; f__Saccharimonadaceae; g__Candidatus Saccharimonas; s__uncultured rumen bacterium	35	0	0	0	0	0	0	0	0	0	0	0	0	0	0	0	0	0	0	0	0	0	0	0
ASV1488	d__Bacteria; p__Firmicutes; c__Clostridia; o__Oscillospirales; f__[Eubacterium] coprostanoligenes group; g__norank; s__uncultured bacterium	9	0	0	5	4	0	0	0	0	0	0	0	0	0	0	0	0	0	7	0	3	0	0	0
ASV1489	d__Bacteria; p__Bacteroidota; c__Bacteroidia; o__Bacteroidales; f__Prevotellaceae; g__Prevotella; s__uncultured bacterium	19	0	0	0	0	0	0	0	0	0	0	0	0	0	0	0	0	0	13	0	0	0	0	0
ASV1490	d__Bacteria; p__Firmicutes; c__Clostridia; o__Lachnospirales; f__Lachnospiraceae; g__Lachnoclostridium; s__uncultured bacterium	9	0	0	0	0	0	0	3	0	3	0	0	0	0	0	0	7	0	0	0	0	0	0	0
ASV1491	d__Bacteria; p__Spirochaetota; c__Spirochaetia; o__Spirochaetales; f__Spirochaetaceae; g__Treponema; s__uncultured rumen bacterium	0	9	0	0	0	0	0	0	0	0	0	0	0	0	0	0	0	0	0	12	0	0	15	0
ASV1492	d__Bacteria; p__Firmicutes; c__Clostridia; o__Christensenellales; f__Christensenellaceae; g__Christensenellaceae R-7 group; s__uncultured rumen bacterium	0	5	0	0	0	0	0	0	0	0	0	0	0	0	9	0	0	6	0	0	0	0	15	0
ASV1493	d__Bacteria; p__Firmicutes; c__Clostridia; o__Oscillospirales; f__Oscillospiraceae; g__UCG-005; s__uncultured rumen bacterium	0	7	0	0	0	0	0	0	0	0	6	8	0	0	10	0	0	0	0	0	0	0	7	0
ASV1494	d__Bacteria; p__Firmicutes; c__Clostridia; o__Oscillospirales; f__UCG-010; g__norank; s__uncultured bacterium	0	0	24	0	0	0	0	0	0	0	0	0	12	0	0	0	0	0	0	0	0	0	0	0
ASV1495	d__Bacteria; p__Cyanobacteria; c__Vampirivibrionia; o__Gastranaerophilales; f__norank; g__norank; s__uncultured bacterium	0	0	13	0	0	0	0	0	0	0	0	0	0	0	0	0	0	0	0	0	10	0	0	0
ASV1496	d__Bacteria; p__Bacteroidota; c__Bacteroidia; o__Bacteroidales; f__Prevotellaceae; g__Prevotella; s__uncultured rumen bacterium	0	0	32	0	0	0	0	0	0	0	0	2	0	0	0	0	0	0	0	0	0	0	0	0
ASV1497	d__Bacteria; p__Patescibacteria; c__Saccharimonadia; o__Saccharimonadales; f__Saccharimonadaceae; g__Candidatus Saccharimonas; s__uncultured bacterium	0	0	10	0	5	0	7	13	0	0	0	0	0	0	0	0	0	0	0	0	0	0	0	0
ASV1498	d__Bacteria; p__Bacteroidota; c__Bacteroidia; o__Bacteroidales; f__Prevotellaceae; g__Prevotella; s__uncultured bacterium	0	0	0	0	9	0	0	0	0	0	0	0	0	0	0	14	0	0	0	0	0	0	0	0
ASV1499	d__Bacteria; p__Bacteroidota; c__Bacteroidia; o__Bacteroidales; f__Prevotellaceae; g__Prevotellaceae Ga6A1 group	0	0	0	0	18	0	0	0	0	0	0	0	0	0	0	0	0	0	0	0	0	0	0	0
ASV1500	d__Bacteria; p__Actinobacteriota; c__Coriobacteriia; o__Coriobacteriales; f__Atopobiaceae; g__Olsenella; s__uncultured rumen bacterium	0	0	0	0	0	12	22	0	0	0	0	0	0	0	0	0	0	0	0	0	0	0	0	0
ASV1501	d__Bacteria; p__Firmicutes; c__Clostridia; o__Clostridia UCG-014; f__norank; g__norank; s__uncultured bacterium	0	0	0	0	0	0	0	0	0	0	0	0	32	0	0	0	0	0	0	0	0	0	0	0
ASV1502	d__Bacteria; p__Firmicutes; c__Clostridia; o__Christensenellales; f__Christensenellaceae; g__Christensenellaceae R-7 group; s__uncultured bacterium	0	0	0	0	0	0	0	0	0	0	0	0	0	0	0	0	0	22	0	0	0	0	0	0
ASV1503	d__Bacteria; p__Bacteroidota; c__Bacteroidia; o__Bacteroidales; f__Rikenellaceae; g__Rikenellaceae RC9 gut group; s__uncultured bacterium	0	0	0	0	0	0	0	0	0	0	0	0	0	0	0	0	0	0	0	0	27	0	0	0
ASV1504	d__Bacteria; p__Firmicutes; c__Clostridia; o__Oscillospirales; f__Ruminococcaceae; g__Ruminococcus; s__uncultured rumen bacterium	0	0	0	0	0	0	0	0	0	0	0	0	0	0	0	0	0	0	0	0	0	25	0	0
ASV1505	d__Bacteria; p__Patescibacteria; c__Gracilibacteria; o__Absconditabacteriales (SR1); f__norank; g__norank	0	0	0	0	0	0	0	0	0	0	0	0	0	0	0	0	0	0	0	0	0	0	0	27
ASV1506	d__Bacteria; p__Firmicutes; c__Clostridia; o__Lachnospirales; f__Lachnospiraceae; g__Roseburia	28	0	0	0	0	0	0	0	0	0	0	0	0	0	0	0	0	0	0	0	0	0	0	0
ASV1507	d__Bacteria; p__Firmicutes; c__Clostridia; o__Lachnospirales; f__Lachnospiraceae; g__Acetitomaculum; s__uncultured rumen bacterium	8	0	0	0	0	0	0	0	0	0	0	0	2	0	3	3	0	0	2	0	8	0	0	0
ASV1508	d__Bacteria; p__Firmicutes; c__Bacilli; o__Mycoplasmatales; f__Mycoplasmataceae; g__Mycoplasma	0	25	0	0	0	0	0	0	0	0	0	0	0	0	0	0	0	0	0	0	0	0	0	0
ASV1509	d__Bacteria; p__Firmicutes; c__Clostridia; o__Oscillospirales; f__Hungateiclostridiaceae; g__Ruminiclostridium; s__uncultured bacterium	0	7	12	0	0	0	3	0	0	0	0	0	0	0	19	0	0	0	0	0	0	0	0	0
ASV1510	d__Bacteria; p__Firmicutes; c__Clostridia; o__Lachnospirales; f__Lachnospiraceae; g__Lachnospiraceae UCG-006; s__uncultured bacterium	0	0	8	0	0	0	0	9	0	0	0	0	0	0	0	9	0	0	0	0	6	0	0	0
ASV1511	d__Bacteria; p__Bacteroidota; c__Bacteroidia; o__Bacteroidales; f__Rikenellaceae; g__Rikenellaceae RC9 gut group; s__uncultured rumen bacterium	0	0	35	0	0	0	0	0	0	0	0	0	0	0	0	0	0	0	0	0	0	0	0	0
ASV1512	d__Bacteria; p__Bacteroidota; c__Bacteroidia; o__Bacteroidales; f__Prevotellaceae; g__Prevotellaceae UCG-001; s__uncultured rumen bacterium	0	0	35	0	0	0	0	0	0	0	0	0	0	0	0	0	0	0	0	0	0	0	0	0
ASV1513	d__Bacteria; p__Bacteroidota; c__Bacteroidia; o__Bacteroidales; f__Prevotellaceae; g__Prevotella; s__uncultured bacterium	0	0	0	0	0	0	39	0	0	0	0	0	0	0	0	0	0	0	0	0	0	0	0	0
ASV1514	d__Bacteria; p__Firmicutes; c__Clostridia; o__Lachnospirales; f__Lachnospiraceae; g__Lachnospiraceae NK3A20 group; s__uncultured bacterium	0	0	0	0	0	0	0	10	0	6	0	0	0	8	0	0	0	0	0	0	0	0	0	0
ASV1515	d__Bacteria; p__Firmicutes; c__Clostridia; o__Lachnospirales; f__Defluviitaleaceae; g__Defluviitaleaceae UCG-011; s__uncultured rumen bacterium	0	0	0	0	0	0	0	0	0	0	13	13	0	0	0	0	0	0	0	0	0	0	0	6
ASV1516	d__Bacteria; p__Bacteroidota; c__Bacteroidia; o__Bacteroidales; f__F082; g__norank; s__uncultured bacterium	0	0	0	0	0	0	0	0	0	0	0	24	0	0	0	0	0	0	0	0	0	0	0	0
ASV1517	d__Bacteria; p__Bacteroidota; c__Bacteroidia; o__Bacteroidales; f__Prevotellaceae; g__Prevotellaceae UCG-004; s__uncultured rumen bacterium	0	0	0	0	0	0	0	0	0	0	0	0	24	0	0	0	0	0	0	0	0	0	6	0
ASV1518	d__Bacteria; p__Firmicutes; c__Clostridia; o__Lachnospirales; f__Lachnospiraceae; g__Butyrivibrio; s__uncultured bacterium	0	0	0	0	0	0	0	0	0	0	0	0	28	0	0	0	0	0	0	0	0	0	0	0
ASV1519	d__Bacteria; p__Bacteroidota; c__Bacteroidia; o__Bacteroidales; f__Prevotellaceae; g__Prevotella; s__uncultured bacterium	0	0	0	0	0	0	0	0	0	0	0	0	0	0	0	30	0	0	0	0	0	0	0	0
ASV1520	d__Bacteria; p__Bacteroidota; c__Bacteroidia; o__Bacteroidales; f__Prevotellaceae; g__Prevotella; s__uncultured bacterium	0	0	0	0	0	0	0	0	0	0	0	0	0	0	0	35	0	0	0	0	0	0	0	0
ASV1521	d__Bacteria; p__Bacteroidota; c__Bacteroidia; o__Bacteroidales; f__Prevotellaceae; g__Prevotellaceae YAB2003 group; s__uncultured rumen bacterium	0	0	0	0	0	0	0	0	0	0	0	0	0	0	0	0	0	0	29	0	0	0	0	0
ASV1522	d__Bacteria; p__Firmicutes; c__Clostridia; o__Clostridia UCG-014; f__norank; g__norank; s__uncultured bacterium	0	0	0	0	0	0	0	0	0	0	0	0	0	0	0	0	0	0	0	0	0	26	0	0
ASV1523	d__Bacteria; p__Firmicutes; c__Clostridia; o__Lachnospirales; f__Lachnospiraceae; g__Butyrivibrio; s__uncultured rumen bacterium	0	0	0	0	0	0	0	0	0	0	0	0	0	0	0	0	0	0	0	0	0	0	40	0
ASV1524	d__Bacteria; p__Firmicutes; c__Clostridia; o__Oscillospirales; f__Oscillospiraceae; g__NK4A214 group	0	10	0	0	3	0	0	0	0	0	0	0	0	0	23	0	0	0	0	0	0	0	0	0
ASV1525	d__Bacteria; p__Firmicutes; c__Clostridia; o__Oscillospirales; f__[Eubacterium] coprostanoligenes group; g__norank; s__uncultured rumen bacterium	0	8	0	4	0	0	0	0	0	0	0	0	0	0	0	0	0	0	0	0	0	0	13	0
ASV1526	d__Bacteria; p__Firmicutes; c__Clostridia; o__Lachnospirales; f__Lachnospiraceae; g__Lachnospiraceae FCS020 group	0	16	0	0	0	0	0	0	0	0	0	0	0	0	0	5	0	0	0	0	0	0	0	0
ASV1527	d__Bacteria; p__Firmicutes; c__Bacilli; o__Erysipelotrichales; f__Erysipelatoclostridiaceae; g__UCG-004	0	6	0	0	0	0	0	0	0	0	0	0	8	0	0	0	0	0	14	0	0	0	8	0
ASV1528	d__Bacteria; p__Bacteroidota; c__Bacteroidia; o__Bacteroidales; f__Prevotellaceae; g__Prevotellaceae UCG-003	0	0	36	0	0	0	0	0	0	0	0	0	0	0	0	0	0	0	0	0	0	0	0	0
ASV1529	d__Bacteria; p__Firmicutes; c__Clostridia; o__Lachnospirales; f__Lachnospiraceae; g__Oribacterium; s__uncultured rumen bacterium	0	0	10	0	0	0	0	0	8	0	0	0	14	0	0	0	0	0	0	0	0	0	0	0
ASV1530	d__Bacteria; p__Spirochaetota; c__Spirochaetia; o__Spirochaetales; f__Spirochaetaceae; g__Treponema	0	0	0	8	0	0	0	20	0	0	0	0	0	0	0	0	0	0	0	0	0	0	0	0
ASV1531	d__Bacteria; p__Spirochaetota; c__Spirochaetia; o__Spirochaetales; f__Spirochaetaceae; g__Treponema; s__uncultured bacterium	0	0	0	20	0	0	0	0	0	0	0	0	0	0	0	0	0	0	0	0	0	0	0	0
ASV1532	d__Bacteria; p__Firmicutes; c__Clostridia; o__Oscillospirales; f__[Eubacterium] coprostanoligenes group; g__norank; s__uncultured bacterium	0	0	0	0	12	0	0	0	0	0	6	0	0	0	0	0	0	0	0	0	0	4	0	0
ASV1533	d__Bacteria; p__Firmicutes; c__Clostridia; o__Lachnospirales; f__Lachnospiraceae; g__Lachnospiraceae ND3007 group; s__uncultured rumen bacterium	0	0	0	0	0	0	0	0	0	0	0	29	0	0	0	0	0	0	0	0	0	0	0	0
ASV1534	d__Bacteria; p__Firmicutes; c__Clostridia; o__Oscillospirales; f__Ruminococcaceae; g__Ruminococcus; s__uncultured rumen bacterium	0	0	0	0	0	0	0	0	0	0	0	31	0	0	0	0	0	0	0	0	0	0	0	0
ASV1535	d__Bacteria; p__Actinobacteriota; c__Coriobacteriia; o__Coriobacteriales; f__Atopobiaceae; g__Olsenella; s__uncultured rumen bacterium	0	0	0	0	0	0	0	0	0	0	0	0	0	28	0	0	0	0	0	0	0	0	0	0
ASV1536	d__Bacteria; p__Firmicutes; c__Clostridia; o__Oscillospirales; f__Ruminococcaceae; g__Ruminococcus; s__uncultured bacterium	0	0	0	0	0	0	0	0	0	0	0	0	0	0	44	0	0	0	0	0	0	0	0	0
ASV1537	d__Bacteria; p__Firmicutes; c__Negativicutes; o__Veillonellales-Selenomonadales; f__Selenomonadaceae; g__Selenomonas; s__Selenomonas ruminantium AB3002	0	0	0	0	0	0	0	0	0	0	0	0	0	0	0	16	0	0	0	0	11	0	0	0
ASV1538	d__Bacteria; p__Bacteroidota; c__Bacteroidia; o__Bacteroidales; f__Prevotellaceae; g__Prevotellaceae UCG-003; s__uncultured bacterium	0	0	0	0	0	0	0	0	0	0	0	0	0	0	0	17	0	0	0	0	0	11	0	0
ASV1539	d__Bacteria; p__Firmicutes; c__Negativicutes; o__Veillonellales-Selenomonadales; f__Selenomonadaceae; g__Selenomonas	0	0	0	0	0	0	0	0	0	0	0	0	0	0	0	0	29	0	0	0	0	0	0	0
ASV1540	d__Bacteria; p__Bacteroidota; c__Bacteroidia; o__Bacteroidales; f__Prevotellaceae; g__Prevotella; s__uncultured rumen bacterium	0	0	0	0	0	0	0	0	0	0	0	0	0	0	0	0	25	0	0	0	0	0	0	0
ASV1541	d__Bacteria; p__Bacteroidota; c__Bacteroidia; o__Bacteroidales; f__Prevotellaceae; g__Prevotella; s__uncultured bacterium	0	0	0	0	0	0	0	0	0	0	0	0	0	0	0	0	0	11	0	0	0	0	14	0
ASV1542	d__Bacteria; p__Bacteroidota; c__Bacteroidia; o__Bacteroidales; f__Muribaculaceae; g__norank; s__uncultured bacterium	0	0	0	0	0	0	0	0	0	0	0	0	0	0	0	0	0	0	35	0	0	0	0	0
ASV1543	d__Bacteria; p__Bacteroidota; c__Bacteroidia; o__Bacteroidales; f__Prevotellaceae; g__Prevotellaceae UCG-004	0	0	0	0	0	0	0	0	0	0	0	0	0	0	0	0	0	0	34	0	0	0	0	0
ASV1544	d__Bacteria; p__Bacteroidota; c__Bacteroidia; o__Bacteroidales; f__Prevotellaceae; g__Prevotella; s__uncultured bacterium	0	0	0	0	0	0	0	0	0	0	0	0	0	0	0	0	0	0	0	39	0	0	0	0
ASV1545	d__Bacteria; p__Firmicutes; c__Clostridia; o__Oscillospirales; f__UCG-010; g__norank; s__uncultured bacterium	0	0	0	0	0	0	0	0	0	0	0	0	0	0	0	0	0	0	0	0	0	0	0	26
ASV1546	d__Bacteria; p__Bacteroidota; c__Bacteroidia; o__Bacteroidales; f__Rikenellaceae; g__Rikenellaceae RC9 gut group; s__uncultured rumen bacterium	0	0	0	0	0	0	0	0	0	0	0	0	0	0	0	0	0	0	0	0	0	0	0	21
ASV1547	d__Bacteria; p__Bacteroidota; c__Bacteroidia; o__Bacteroidales; f__Prevotellaceae; g__Prevotella; s__uncultured rumen bacterium	0	0	0	0	0	0	0	0	0	0	0	0	0	0	0	0	0	0	0	0	0	0	0	21
ASV1548	d__Bacteria; p__Bacteroidota; c__Bacteroidia; o__Bacteroidales; f__Prevotellaceae; g__Prevotella_9; s__uncultured bacterium	9	0	0	0	0	0	0	0	0	22	0	0	0	0	0	0	0	0	0	0	0	0	0	0
ASV1549	d__Bacteria; p__Firmicutes; c__Clostridia; o__Oscillospirales; f__Oscillospiraceae; g__NK4A214 group; s__uncultured bacterium	0	8	0	2	0	0	0	0	0	0	0	7	0	0	0	0	0	9	0	0	0	0	0	0
ASV1550	d__Bacteria; p__Bacteroidota; c__Bacteroidia; o__Bacteroidales; f__Rikenellaceae; g__Rikenellaceae RC9 gut group; s__uncultured rumen bacterium	0	22	0	0	0	0	0	0	0	0	0	0	0	0	0	0	0	0	0	0	0	0	0	0
ASV1551	d__Bacteria; p__Bacteroidota; c__Bacteroidia; o__Bacteroidales; f__uncultured; g__norank; s__uncultured rumen bacterium	0	3	0	0	0	0	0	0	0	0	0	0	0	0	0	0	0	11	0	0	6	0	0	0
ASV1552	d__Bacteria; p__Firmicutes; c__Clostridia; o__Lachnospirales; f__Lachnospiraceae; g__Lachnoclostridium; s__uncultured bacterium	0	3	0	3	0	2	0	0	0	0	2	1	6	0	0	0	0	0	3	0	0	0	0	0
ASV1553	d__Bacteria; p__Bacteroidota; c__Bacteroidia; o__Bacteroidales; f__Prevotellaceae; g__Prevotella; s__uncultured rumen bacterium	0	24	0	0	0	0	0	0	0	0	0	0	0	0	0	0	0	0	0	0	0	0	0	0
ASV1554	d__Bacteria; p__Bacteroidota; c__Bacteroidia; o__Bacteroidales; f__Prevotellaceae; g__Prevotellaceae UCG-003	0	0	38	0	0	0	0	0	0	0	0	0	0	0	0	0	0	0	0	0	0	0	0	0
ASV1555	d__Bacteria; p__Bacteroidota; c__Bacteroidia; o__Bacteroidales; f__Prevotellaceae; g__Prevotella; s__uncultured rumen bacterium	0	0	16	0	0	0	0	0	0	0	0	0	0	0	0	0	0	0	0	0	13	0	0	0
ASV1556	d__Bacteria; p__Bacteroidota; c__Bacteroidia; o__Bacteroidales; f__Rikenellaceae; g__Rikenellaceae RC9 gut group; s__uncultured bacterium	0	0	0	3	7	0	0	8	0	0	0	0	0	0	0	0	0	0	0	0	0	0	0	0
ASV1557	d__Bacteria; p__Bacteroidota; c__Bacteroidia; o__Bacteroidales; f__Prevotellaceae; g__Prevotella; s__uncultured bacterium	0	0	0	17	0	0	0	0	0	0	0	0	0	0	0	0	0	0	0	0	0	10	0	0
ASV1558	d__Bacteria; p__Bacteroidota; c__Bacteroidia; o__Bacteroidales; f__Prevotellaceae; g__Prevotella; s__uncultured rumen bacterium	0	0	0	0	0	0	40	0	0	0	0	0	0	0	0	0	0	0	0	0	0	0	0	0
ASV1559	d__Bacteria; p__Firmicutes; c__Clostridia; o__Oscillospirales; f__Ruminococcaceae; g__Ruminococcus	0	0	0	0	0	0	0	23	0	0	0	0	0	0	0	0	0	0	0	0	0	0	0	0
ASV1560	d__Bacteria; p__Spirochaetota; c__Spirochaetia; o__Spirochaetales; f__Spirochaetaceae; g__Treponema; s__uncultured rumen bacterium	0	0	0	0	0	0	0	8	0	0	0	0	0	0	11	0	0	5	0	0	0	6	0	0
ASV1561	d__Bacteria; p__Firmicutes; c__Clostridia; o__Oscillospirales; f__Ruminococcaceae; g__Ruminococcus; s__uncultured bacterium	0	0	0	0	0	0	0	0	25	0	0	0	0	0	7	0	0	0	0	0	0	0	0	0
ASV1562	d__Bacteria; p__Firmicutes; c__Negativicutes; o__Acidaminococcales; f__Acidaminococcaceae; g__Succiniclasticum; s__uncultured rumen bacterium	0	0	0	0	0	0	0	0	0	0	5	0	0	0	0	0	0	0	6	11	10	0	0	0
ASV1563	d__Bacteria; p__Firmicutes; c__Clostridia; o__Lachnospirales; f__Lachnospiraceae; g__Roseburia; s__uncultured bacterium	0	0	0	0	0	0	0	0	0	0	0	0	0	0	0	12	0	0	11	0	0	0	13	0
ASV1564	d__Bacteria; p__Firmicutes; c__Clostridia; o__Peptostreptococcales-Tissierellales; f__Anaerovoracaceae; g__Anaerovorax; s__uncultured rumen bacterium	0	0	0	0	0	0	0	0	0	0	0	0	0	0	0	6	0	0	0	0	6	0	8	9
ASV1565	d__Bacteria; p__Proteobacteria; c__Alphaproteobacteria; o__Rhodospirillales; f__uncultured; g__norank; s__uncultured bacterium	0	0	0	0	0	0	0	0	0	0	0	0	0	0	0	0	5	12	0	0	0	0	8	0
ASV1566	d__Bacteria; p__Patescibacteria; c__Saccharimonadia; o__Saccharimonadales; f__Saccharimonadaceae; g__Candidatus Saccharimonas; s__uncultured rumen bacterium	0	0	0	0	0	0	0	0	0	0	0	0	0	0	0	0	0	0	0	39	0	0	0	0
ASV1567	d__Bacteria; p__Bacteroidota; c__Bacteroidia; o__Bacteroidales; f__Prevotellaceae; g__Prevotellaceae Ga6A1 group	0	0	0	0	0	0	0	0	0	0	0	0	0	0	0	0	0	0	0	0	0	33	0	0
ASV1568	d__Bacteria; p__Bacteroidota; c__Bacteroidia; o__Bacteroidales; f__Muribaculaceae; g__norank; s__uncultured rumen bacterium	0	0	0	0	0	0	0	0	0	0	0	0	0	0	0	0	0	0	0	0	0	0	39	0
ASV1569	d__Bacteria; p__Bacteroidota; c__Bacteroidia; o__Bacteroidales; f__uncultured; g__norank; s__uncultured bacterium	0	5	0	0	0	0	0	0	0	0	0	0	0	0	0	13	0	0	0	0	0	0	11	0
ASV1570	d__Bacteria; p__Firmicutes; c__Clostridia; o__Lachnospirales; f__Lachnospiraceae; g__Lachnospiraceae XPB1014 group; s__uncultured rumen bacterium	0	17	0	0	0	0	0	0	0	0	0	0	0	0	0	0	0	0	0	0	0	0	0	0
ASV1571	d__Bacteria; p__Patescibacteria; c__Gracilibacteria; o__Absconditabacteriales (SR1); f__norank; g__norank	0	0	18	2	0	0	0	0	0	0	0	0	3	0	0	0	0	0	1	0	3	0	0	0
ASV1572	d__Bacteria; p__Firmicutes; c__Clostridia; o__Christensenellales; f__Christensenellaceae; g__Christensenellaceae R-7 group; s__uncultured bacterium	0	0	33	0	0	0	0	0	0	0	0	0	0	0	0	0	0	0	0	0	0	0	0	0
ASV1573	d__Bacteria; p__Firmicutes; c__Clostridia; o__Christensenellales; f__Christensenellaceae; g__Christensenellaceae R-7 group; s__uncultured bacterium	0	0	33	0	0	0	0	0	0	0	0	0	0	0	0	0	0	0	0	0	0	0	0	0
ASV1574	d__Bacteria; p__Spirochaetota; c__Spirochaetia; o__Spirochaetales; f__Spirochaetaceae; g__Treponema; s__uncultured bacterium	0	0	0	6	0	0	0	0	0	0	0	0	0	0	0	0	0	0	0	0	0	24	0	0
ASV1575	d__Bacteria; p__Firmicutes; c__Clostridia; o__Clostridia vadinBB60 group; f__norank; g__norank; s__uncultured rumen bacterium	0	0	0	3	3	9	0	0	6	0	0	0	0	0	0	0	0	0	0	0	0	0	0	0
ASV1576	d__Bacteria; p__Firmicutes; c__Clostridia; o__Oscillospirales; f__UCG-010; g__norank; s__uncultured bacterium	0	0	0	6	0	0	0	0	0	0	0	0	0	0	0	0	0	0	0	0	15	0	0	0
ASV1577	d__Bacteria; p__Firmicutes; c__Bacilli; o__Erysipelotrichales; f__Erysipelatoclostridiaceae; g__UCG-004	0	0	0	0	0	0	4	0	0	0	0	0	12	0	0	0	0	5	0	0	0	0	0	0
ASV1578	d__Bacteria; p__Firmicutes; c__Clostridia; o__Oscillospirales; f__Ruminococcaceae; g__norank; s__uncultured bacterium	0	0	0	0	0	0	0	7	0	0	0	0	0	0	0	0	0	0	0	0	16	0	0	0
ASV1579	d__Bacteria; p__Spirochaetota; c__Spirochaetia; o__Spirochaetales; f__Spirochaetaceae; g__Treponema; s__uncultured rumen bacterium	0	0	0	0	0	0	0	3	0	0	0	0	0	0	0	0	0	8	0	0	0	4	0	5
ASV1580	d__Bacteria; p__Firmicutes; c__Clostridia; o__Oscillospirales; f__Ruminococcaceae; g__Ruminococcus; s__uncultured rumen bacterium	0	0	0	0	0	0	0	0	30	0	0	0	0	0	0	0	0	0	0	0	0	0	0	0
ASV1581	d__Bacteria; p__Spirochaetota; c__Spirochaetia; o__Spirochaetales; f__Spirochaetaceae; g__Treponema	0	0	0	0	0	0	0	0	0	26	0	0	0	0	0	0	0	0	0	0	0	0	0	0
ASV1582	d__Bacteria; p__Firmicutes; c__Clostridia; o__Christensenellales; f__Christensenellaceae; g__Christensenellaceae R-7 group; s__uncultured bacterium	0	0	0	0	0	0	0	0	0	0	24	0	0	0	0	0	0	0	0	0	0	0	0	0
ASV1583	d__Bacteria; p__Bacteroidota; c__Bacteroidia; o__Bacteroidales; f__Prevotellaceae; g__Prevotellaceae YAB2003 group; s__uncultured bacterium	0	0	0	0	0	0	0	0	0	0	0	0	24	0	0	0	0	0	0	0	0	0	0	0
ASV1584	Unclassified	0	0	0	0	0	0	0	0	0	0	0	0	0	0	42	0	0	0	0	0	0	0	0	0
ASV1585	d__Bacteria; p__Firmicutes; c__Clostridia; o__Oscillospirales; f__Hungateiclostridiaceae; g__Saccharofermentans; s__uncultured rumen bacterium	0	0	0	0	0	0	0	0	0	0	0	0	0	0	0	21	0	0	0	0	0	0	0	0
ASV1586	d__Bacteria; p__Spirochaetota; c__Spirochaetia; o__Spirochaetales; f__Spirochaetaceae; g__Treponema; s__uncultured rumen bacterium	0	0	0	0	0	0	0	0	0	0	0	0	0	0	0	0	0	0	0	34	0	0	0	0
ASV1587	d__Bacteria; p__Firmicutes; c__Clostridia; o__Oscillospirales; f__[Eubacterium] coprostanoligenes group; g__norank; s__uncultured rumen bacterium	0	0	0	0	0	0	0	0	0	0	0	0	0	0	0	0	0	0	0	0	22	0	0	0
ASV1588	d__Bacteria; p__Bacteroidota; c__Bacteroidia; o__Bacteroidales; f__Prevotellaceae; g__Prevotella; s__uncultured rumen bacterium	0	0	0	0	0	0	0	0	0	0	0	0	0	0	0	0	0	0	0	0	0	0	38	0
ASV1589	d__Bacteria; p__Bacteroidota; c__Bacteroidia; o__Bacteroidales; f__F082; g__norank; s__uncultured bacterium	21	0	0	0	1	0	0	0	0	0	0	0	0	0	0	0	0	0	3	0	0	0	0	0
ASV1590	d__Bacteria; p__Patescibacteria; c__Gracilibacteria; o__Absconditabacteriales (SR1); f__norank; g__norank; s__uncultured rumen bacterium	5	11	10	0	0	0	0	0	0	0	0	5	0	0	0	0	0	0	0	0	0	0	0	0
ASV1591	d__Bacteria; p__Firmicutes; c__Negativicutes; o__Veillonellales-Selenomonadales; f__Selenomonadaceae; g__Mitsuokella; s__uncultured bacterium	18	0	0	1	0	0	0	0	0	0	0	0	0	4	0	0	0	0	0	0	0	0	0	0
ASV1592	d__Bacteria; p__Firmicutes; c__Clostridia; o__Oscillospirales; f__[Eubacterium] coprostanoligenes group; g__norank; s__uncultured rumen bacterium	0	14	0	0	0	0	0	0	0	0	0	0	4	0	0	0	0	0	0	0	0	0	5	0
ASV1593	d__Bacteria; p__Firmicutes; c__Clostridia; o__Christensenellales; f__Christensenellaceae; g__Christensenellaceae R-7 group; s__uncultured bacterium	0	0	14	0	0	0	0	0	0	0	0	0	0	0	0	0	0	0	9	0	0	7	0	0
ASV1594	d__Bacteria; p__Proteobacteria; c__Alphaproteobacteria; o__Rhodospirillales; f__uncultured; g__norank; s__uncultured bacterium	0	0	0	18	0	0	0	0	0	0	0	0	0	0	0	0	0	0	0	0	0	0	0	0
ASV1595	d__Bacteria; p__Firmicutes; c__Clostridia; o__Lachnospirales; f__Lachnospiraceae; g__possible genus Sk018; s__uncultured bacterium	0	0	0	0	15	0	0	0	0	0	0	0	0	0	0	11	0	0	0	0	0	0	0	0
ASV1596	d__Bacteria; p__Firmicutes; c__Clostridia; o__Lachnospirales; f__Lachnospiraceae; g__Moryella	0	0	0	0	6	0	0	0	0	0	0	0	0	0	0	0	0	0	0	0	10	0	0	0
ASV1597	d__Bacteria; p__Bacteroidota; c__Bacteroidia; o__Bacteroidales; f__F082; g__norank; s__uncultured rumen bacterium	0	0	0	0	0	28	0	0	0	0	0	0	0	0	0	0	0	0	0	0	0	0	0	0
ASV1598	d__Bacteria; p__Firmicutes; c__Clostridia; o__Christensenellales; f__Christensenellaceae; g__Christensenellaceae R-7 group; s__uncultured bacterium	0	0	0	0	0	9	0	0	0	0	0	5	6	0	0	0	0	5	0	0	0	0	0	0
ASV1599	d__Bacteria; p__Firmicutes; c__Clostridia; o__Lachnospirales; f__Lachnospiraceae; g__Butyrivibrio	0	0	0	0	0	0	41	0	0	0	0	0	0	0	0	0	0	0	0	0	0	0	0	0
ASV1600	d__Bacteria; p__Firmicutes; c__Clostridia; o__Oscillospirales; f__Ruminococcaceae; g__Ruminococcus; s__uncultured bacterium	0	0	0	0	0	0	0	18	0	0	0	0	0	0	0	0	0	0	0	0	0	0	0	0
ASV1601	d__Bacteria; p__Firmicutes; c__Clostridia; o__Lachnospirales; f__Lachnospiraceae; g__Lachnospiraceae NK4A136 group; s__uncultured rumen bacterium	0	0	0	0	0	0	0	25	0	0	0	0	0	0	0	0	0	0	0	0	0	0	0	0
ASV1602	d__Bacteria; p__Firmicutes; c__Clostridia; o__Oscillospirales; f__Hungateiclostridiaceae; g__Saccharofermentans; s__uncultured bacterium	0	0	0	0	0	0	0	0	36	0	0	0	0	0	0	0	0	0	0	0	0	0	0	0
ASV1603	d__Bacteria; p__Bacteroidota; c__Bacteroidia; o__Bacteroidales; f__Rikenellaceae; g__Rikenellaceae RC9 gut group; s__uncultured bacterium	0	0	0	0	0	0	0	0	0	0	18	0	0	0	0	0	0	0	0	0	0	0	0	4
ASV1604	d__Bacteria; p__Firmicutes; c__Clostridia; o__Oscillospirales; f__Ruminococcaceae; g__norank; s__uncultured bacterium	0	0	0	0	0	0	0	0	0	0	18	16	0	0	0	0	0	0	0	0	0	0	0	0
ASV1605	d__Bacteria; p__Firmicutes; c__Clostridia; o__Lachnospirales; f__Lachnospiraceae; g__Blautia; s__uncultured bacterium	0	0	0	0	0	0	0	0	0	0	0	0	3	0	0	0	0	0	0	32	0	0	0	0
ASV1606	d__Bacteria; p__Firmicutes; c__Clostridia; o__Oscillospirales; f__Oscillospiraceae; g__UCG-005; s__uncultured bacterium	0	0	0	0	0	0	0	0	0	0	0	0	13	0	6	0	0	5	2	0	5	0	0	0
ASV1607	d__Bacteria; p__Firmicutes; c__Clostridia; o__Oscillospirales; f__[Eubacterium] coprostanoligenes group; g__norank; s__uncultured bacterium	0	0	0	0	0	0	0	0	0	0	0	0	0	0	0	0	29	0	0	0	0	0	0	0
ASV1608	d__Bacteria; p__Firmicutes; c__Clostridia; o__Clostridia UCG-014; f__norank; g__norank; s__uncultured bacterium	0	0	0	0	0	0	0	0	0	0	0	0	0	0	0	0	0	16	0	0	0	0	0	8
ASV1609	d__Bacteria; p__Bacteroidota; c__Bacteroidia; o__Bacteroidales; f__p-251-o5; g__norank; s__uncultured rumen bacterium	0	0	0	0	0	0	0	0	0	0	0	0	0	0	0	0	0	0	0	37	0	0	0	0
ASV1610	d__Bacteria; p__Proteobacteria; c__Alphaproteobacteria; o__Rhodospirillales; f__uncultured; g__norank; s__uncultured bacterium	0	0	0	0	0	0	0	0	0	0	0	0	0	0	0	0	0	0	0	0	8	0	0	16
ASV1611	d__Bacteria; p__Bacteroidota; c__Bacteroidia; o__Bacteroidales; f__F082; g__norank; s__uncultured bacterium	0	0	0	0	0	0	0	0	0	0	0	0	0	0	0	0	0	0	0	0	0	0	0	27
ASV1612	d__Bacteria; p__Firmicutes; c__Clostridia; o__Peptostreptococcales-Tissierellales; f__Anaerovoracaceae; g__Anaerovorax; s__uncultured rumen bacterium	24	0	0	0	0	0	0	6	0	0	0	0	0	0	0	0	0	0	0	0	0	0	0	0
ASV1613	d__Bacteria; p__Firmicutes; c__Clostridia; o__Oscillospirales; f__Ruminococcaceae; g__uncultured; s__uncultured bacterium	0	10	0	0	0	0	0	0	0	0	0	10	0	0	0	0	0	4	0	0	0	0	0	0
ASV1614	d__Bacteria; p__Elusimicrobiota; c__Elusimicrobia; o__Elusimicrobiales; f__Elusimicrobiaceae; g__Elusimicrobium	0	0	23	0	9	0	0	0	0	0	0	0	0	0	0	0	0	0	0	0	0	0	0	0
ASV1615	d__Bacteria; p__Firmicutes; c__Clostridia; o__Oscillospirales; f__Ruminococcaceae; g__uncultured; s__uncultured rumen bacterium	0	0	32	0	0	0	0	0	0	0	0	0	0	0	0	0	0	0	0	0	0	0	0	0
ASV1616	d__Bacteria; p__Bacteroidota; c__Bacteroidia; o__Bacteroidales; f__Rikenellaceae; g__Rikenellaceae RC9 gut group; s__uncultured rumen bacterium	0	0	31	0	0	0	0	0	0	0	0	0	0	0	0	0	0	0	0	0	0	0	0	0
ASV1617	d__Bacteria; p__Bacteroidota; c__Bacteroidia; o__Bacteroidales; f__Muribaculaceae; g__norank; s__uncultured bacterium	0	0	0	0	4	0	0	0	0	0	0	0	0	0	0	0	0	0	0	0	9	3	0	0
ASV1618	d__Bacteria; p__Firmicutes; c__Clostridia; o__Lachnospirales; f__Lachnospiraceae; g__[Eubacterium] ruminantium group	0	0	0	0	0	0	0	6	0	0	0	0	13	0	0	0	0	0	0	0	0	0	0	0
ASV1619	d__Bacteria; p__Spirochaetota; c__Spirochaetia; o__Spirochaetales; f__Spirochaetaceae; g__Treponema	0	0	0	0	0	0	0	12	0	0	0	0	0	0	0	0	0	0	0	0	0	10	0	0
ASV1620	d__Bacteria; p__Firmicutes; c__Clostridia; o__Oscillospirales; f__Ruminococcaceae; g__Ruminococcus; s__uncultured rumen bacterium	0	0	0	0	0	0	0	0	0	0	30	0	0	0	0	0	0	0	0	0	0	0	0	0
ASV1621	d__Bacteria; p__Firmicutes; c__Clostridia; o__Oscillospirales; f__Ruminococcaceae; g__uncultured; s__uncultured rumen bacterium	0	0	0	0	0	0	0	0	0	0	0	0	13	0	0	11	0	0	9	0	0	0	0	0
ASV1622	d__Bacteria; p__Patescibacteria; c__Saccharimonadia; o__Saccharimonadales; f__Saccharimonadaceae; g__Candidatus Saccharimonas; s__uncultured rumen bacterium	0	0	0	0	0	0	0	0	0	0	0	0	27	0	0	0	0	0	0	0	0	0	0	0
ASV1623	d__Bacteria; p__Bacteroidota; c__Bacteroidia; o__Bacteroidales; f__p-251-o5; g__norank; s__uncultured rumen bacterium	0	0	0	0	0	0	0	0	0	0	0	0	28	0	0	0	0	0	0	0	0	0	0	0
ASV1624	d__Bacteria; p__Bacteroidota; c__Bacteroidia; o__Bacteroidales; f__p-2534-18B5 gut group; g__norank; s__uncultured rumen bacterium	0	0	0	0	0	0	0	0	0	0	0	0	0	0	0	0	22	0	0	0	0	0	0	0
ASV1625	d__Bacteria; p__Firmicutes; c__Clostridia; o__Clostridia UCG-014; f__norank; g__norank; s__uncultured bacterium	0	0	0	0	0	0	0	0	0	0	0	0	0	0	0	0	0	0	32	0	0	0	0	0
ASV1626	d__Bacteria; p__Firmicutes; c__Clostridia; o__Oscillospirales; f__Ruminococcaceae; g__CAG-352; s__uncultured bacterium	0	0	0	0	0	0	0	0	0	0	0	0	0	0	0	0	0	0	0	0	0	0	0	19
ASV1627	d__Bacteria; p__Spirochaetota; c__Spirochaetia; o__Spirochaetales; f__Spirochaetaceae; g__Treponema; s__uncultured bacterium	0	0	0	0	0	0	0	0	0	0	0	0	0	0	0	0	0	0	0	0	0	0	0	17
ASV1628	d__Bacteria; p__Bacteroidota; c__Bacteroidia; o__Bacteroidales; f__Prevotellaceae; g__Prevotellaceae UCG-003; s__uncultured bacterium	0	0	0	0	0	0	0	0	0	0	0	0	0	0	0	0	0	0	0	0	0	0	0	19
ASV1629	d__Bacteria; p__Firmicutes; c__Clostridia; o__Lachnospirales; f__Defluviitaleaceae; g__Defluviitaleaceae UCG-011; s__uncultured bacterium	3	0	0	0	0	0	0	0	0	0	0	10	7	4	0	0	0	0	0	0	0	0	0	0
ASV1630	d__Bacteria; p__Firmicutes; c__Clostridia; o__Lachnospirales; f__Lachnospiraceae; g__Lachnospiraceae UCG-008; s__uncultured rumen bacterium	0	11	0	0	0	0	0	0	0	0	0	0	0	0	0	0	0	0	0	0	0	5	0	8
ASV1631	d__Bacteria; p__Bacteroidota; c__Bacteroidia; o__Bacteroidales; f__Prevotellaceae; g__Prevotellaceae UCG-001; s__uncultured bacterium	0	0	30	0	0	0	0	0	0	0	0	0	0	0	0	0	0	0	0	0	0	1	0	0
ASV1632	d__Bacteria; p__Bacteroidota; c__Bacteroidia; o__Bacteroidales; f__Prevotellaceae; g__Prevotellaceae UCG-003; s__uncultured rumen bacterium	0	0	32	0	0	0	0	0	0	0	0	0	0	0	0	0	0	0	0	0	0	0	0	0
ASV1633	d__Bacteria; p__Firmicutes; c__Clostridia; o__Lachnospirales; f__Lachnospiraceae; g__Anaerostipes; s__uncultured bacterium	0	0	0	0	12	0	0	0	0	0	0	0	0	0	14	0	0	0	0	0	0	0	0	0
ASV1634	d__Bacteria; p__Bacteroidota; c__Bacteroidia; o__Bacteroidales; f__Prevotellaceae; g__Prevotellaceae NK3B31 group; s__uncultured rumen bacterium	0	0	0	0	20	0	0	0	0	0	0	0	0	0	0	0	0	0	0	0	0	0	0	0
ASV1635	d__Bacteria; p__Bacteroidota; c__Bacteroidia; o__Bacteroidales; f__Prevotellaceae; g__Prevotella; s__uncultured rumen bacterium	0	0	0	0	0	0	0	20	0	0	0	0	0	0	0	0	0	0	0	0	0	0	0	0
ASV1636	d__Bacteria; p__Firmicutes; c__Clostridia; o__Clostridia UCG-014; f__norank; g__norank; s__uncultured bacterium	0	0	0	0	0	0	0	21	0	0	0	0	0	0	0	0	0	0	0	0	0	0	0	0
ASV1637	d__Bacteria; p__Fibrobacterota; c__Fibrobacteria; o__Fibrobacterales; f__Fibrobacteraceae; g__Fibrobacter	0	0	0	0	0	0	0	0	0	9	0	16	0	0	0	0	0	0	0	0	0	0	0	0
ASV1638	d__Bacteria; p__Firmicutes; c__Clostridia; o__Peptostreptococcales-Tissierellales; f__Anaerovoracaceae; g__Anaerovorax; s__uncultured bacterium	0	0	0	0	0	0	0	0	0	0	0	9	0	0	0	0	0	12	0	0	0	0	0	0
ASV1639	d__Bacteria; p__Firmicutes; c__Clostridia; o__Lachnospirales; f__Lachnospiraceae; g__Lachnospiraceae ND3007 group; s__uncultured Lachnospiraceae bacterium	0	0	0	0	0	0	0	0	0	0	0	0	30	0	0	0	0	0	0	0	0	0	0	0
ASV1640	d__Bacteria; p__Firmicutes; c__Clostridia; o__Lachnospirales; f__Lachnospiraceae; g__Oribacterium; s__uncultured rumen bacterium	0	0	0	0	0	0	0	0	0	0	0	0	0	0	0	0	0	0	12	0	0	10	0	0
ASV1641	d__Bacteria; p__Firmicutes; c__Clostridia; o__Oscillospirales; f__[Eubacterium] coprostanoligenes group; g__norank; s__uncultured bacterium	0	0	0	0	0	0	0	0	0	0	0	0	0	0	0	0	0	0	0	37	0	0	0	0
ASV1642	d__Bacteria; p__Firmicutes; c__Clostridia; o__Clostridia UCG-014; f__norank; g__norank; s__uncultured bacterium	0	0	0	0	0	0	0	0	0	0	0	0	0	0	0	0	0	0	0	0	19	0	0	0
ASV1643	d__Bacteria; p__Bacteroidota; c__Bacteroidia; o__Bacteroidales; f__Prevotellaceae; g__Prevotella; s__uncultured rumen bacterium	0	0	0	0	0	0	0	0	0	0	0	0	0	0	0	0	0	0	0	0	14	0	0	0
ASV1644	d__Bacteria; p__Firmicutes; c__Clostridia; o__Clostridia UCG-014; f__norank; g__norank; s__uncultured bacterium	0	0	0	0	0	0	0	0	0	0	0	0	0	0	0	0	0	0	0	0	20	0	0	0
ASV1645	d__Bacteria; p__Firmicutes; c__Clostridia; o__Clostridia UCG-014; f__norank; g__norank; s__uncultured bacterium	24	0	0	0	0	0	0	0	0	0	0	0	0	0	0	0	0	0	0	0	0	0	0	0
ASV1646	d__Bacteria; p__Firmicutes; c__Clostridia; o__Clostridia vadinBB60 group; f__norank; g__norank; s__uncultured bacterium	10	0	0	0	2	0	0	0	0	0	0	0	0	0	0	0	7	0	0	0	4	0	0	0
ASV1647	d__Bacteria; p__Bacteroidota; c__Bacteroidia; o__Bacteroidales; f__Prevotellaceae; g__Prevotella; s__uncultured bacterium	13	0	0	0	0	0	0	0	0	12	0	0	0	0	0	0	0	0	0	0	0	1	0	0
ASV1648	d__Bacteria; p__Firmicutes; c__Clostridia; o__Oscillospirales; f__Ruminococcaceae; g__Ruminococcus; s__uncultured rumen bacterium	9	0	0	0	0	0	15	0	0	0	0	0	0	0	0	0	0	0	0	0	0	0	0	0
ASV1649	d__Bacteria; p__Firmicutes; c__Clostridia; o__Oscillospirales; f__[Eubacterium] coprostanoligenes group; g__norank; s__uncultured bacterium	4	0	0	0	0	0	0	16	0	0	0	0	0	0	0	0	0	0	0	0	0	0	0	0
ASV1650	d__Bacteria; p__Bacteroidota; c__Bacteroidia; o__Bacteroidales; f__Prevotellaceae; g__Prevotella; s__uncultured rumen bacterium	0	17	0	0	0	0	0	0	0	0	0	0	6	0	0	0	0	0	0	0	0	0	0	0
ASV1651	d__Bacteria; p__Bacteroidota; c__Bacteroidia; o__Bacteroidales; f__Prevotellaceae; g__Prevotella; s__uncultured bacterium	0	12	0	0	0	0	0	0	0	0	0	0	0	0	0	4	0	0	0	0	0	10	0	0
ASV1652	d__Bacteria; p__Firmicutes; c__Clostridia; o__Oscillospirales; f__Ruminococcaceae; g__uncultured; s__uncultured bacterium	0	0	24	0	0	0	0	0	0	0	0	0	0	0	0	0	0	0	0	0	9	0	0	0
ASV1653	d__Bacteria; p__Bacteroidota; c__Bacteroidia; o__Bacteroidales; f__Prevotellaceae; g__Prevotella; s__uncultured rumen bacterium	0	0	33	0	0	0	0	0	0	0	0	0	0	0	0	0	0	0	0	0	0	0	0	0
ASV1654	d__Bacteria; p__Spirochaetota; c__Spirochaetia; o__Spirochaetales; f__Spirochaetaceae; g__Treponema; s__uncultured rumen bacterium	0	0	0	7	0	0	0	0	0	9	8	0	0	0	0	0	0	0	0	0	0	0	0	0
ASV1655	d__Bacteria; p__Firmicutes; c__Clostridia; o__Clostridia UCG-014; f__norank; g__norank; s__uncultured bacterium	0	0	0	25	0	0	0	0	0	0	0	0	0	0	0	0	0	0	0	0	0	0	0	0
ASV1656	d__Bacteria; p__Firmicutes; c__Clostridia; o__Lachnospirales; f__Lachnospiraceae; g__[Eubacterium] ruminantium group; s__uncultured rumen bacterium	0	0	0	13	0	0	0	11	0	0	0	0	0	0	0	0	0	0	0	0	0	0	0	0
ASV1657	d__Bacteria; p__Firmicutes; c__Clostridia; o__Lachnospirales; f__Lachnospiraceae; g__Lachnospiraceae NK4A136 group	0	0	0	12	0	0	0	5	0	0	0	0	0	0	0	0	0	0	0	0	0	0	0	0
ASV1658	d__Bacteria; p__Firmicutes; c__Negativicutes; o__Veillonellales-Selenomonadales; f__Selenomonadaceae; g__Veillonellaceae UCG-001; s__uncultured rumen bacterium	0	0	0	0	22	0	0	0	0	0	0	0	0	0	0	0	0	0	0	0	0	0	0	0
ASV1659	d__Bacteria; p__Bacteroidota; c__Bacteroidia; o__Bacteroidales; f__p-251-o5; g__norank; s__uncultured rumen bacterium	0	0	0	0	0	0	0	13	0	0	0	0	0	0	0	0	0	5	0	0	0	0	0	0
ASV1660	d__Bacteria; p__Bacteroidota; c__Bacteroidia; o__Bacteroidales; f__Rikenellaceae; g__Rikenellaceae RC9 gut group; s__uncultured rumen bacterium	0	0	0	0	0	0	0	15	0	0	0	0	0	0	0	0	0	0	11	0	0	0	0	0
ASV1661	d__Bacteria; p__Bacteroidota; c__Bacteroidia; o__Bacteroidales; f__Bacteroidales RF16 group; g__norank; s__uncultured rumen bacterium	0	0	0	0	0	0	0	0	23	0	0	0	0	0	0	0	0	0	0	0	0	0	0	0
ASV1662	d__Bacteria; p__Firmicutes; c__Clostridia; o__Oscillospirales; f__UCG-010; g__norank; s__uncultured bacterium	0	0	0	0	0	0	0	0	0	0	0	6	4	0	0	0	0	0	7	0	0	0	0	4
ASV1663	d__Bacteria; p__Bacteroidota; c__Bacteroidia; o__Bacteroidales; f__Prevotellaceae; g__Prevotella; s__uncultured rumen bacterium	0	0	0	0	0	0	0	0	0	0	0	0	28	0	0	0	0	0	0	0	0	0	0	0
ASV1664	d__Bacteria; p__Firmicutes; c__Clostridia; o__Clostridia UCG-014; f__norank; g__norank; s__uncultured bacterium	0	0	0	0	0	0	0	0	0	0	0	0	0	0	38	0	0	0	0	0	0	0	0	0
ASV1665	d__Bacteria; p__Firmicutes; c__Clostridia; o__Oscillospirales; f__Ruminococcaceae; g__CAG-352; s__uncultured rumen bacterium	0	0	0	0	0	0	0	0	0	0	0	0	0	0	0	0	0	0	32	0	0	0	0	0
ASV1666	d__Bacteria; p__Firmicutes; c__Bacilli; o__Acholeplasmatales; f__Acholeplasmataceae; g__Anaeroplasma; s__uncultured rumen bacterium	0	0	0	0	0	0	0	0	0	0	0	0	0	0	0	0	0	0	0	33	0	0	0	0
ASV1667	d__Bacteria; p__Bacteroidota; c__Bacteroidia; o__Bacteroidales; f__F082; g__norank; s__uncultured bacterium	0	0	0	0	0	0	0	0	0	0	0	0	0	0	0	0	0	0	0	0	12	0	14	0
ASV1668	d__Bacteria; p__Cyanobacteria; c__Vampirivibrionia; o__Gastranaerophilales; f__norank; g__norank; s__uncultured rumen bacterium	0	0	0	0	0	0	0	0	0	0	0	0	0	0	0	0	0	0	0	0	16	0	0	0
ASV1669	d__Bacteria; p__Bacteroidota; c__Bacteroidia; o__Bacteroidales; f__Prevotellaceae; g__Prevotellaceae UCG-003; s__uncultured bacterium	0	0	0	0	0	0	0	0	0	0	0	0	0	0	0	0	0	0	0	0	0	27	0	0
ASV1670	d__Bacteria; p__Firmicutes; c__Clostridia; o__Lachnospirales; f__Lachnospiraceae; g__[Eubacterium] ruminantium group; s__uncultured rumen bacterium	0	0	0	0	0	0	0	0	0	0	0	0	0	0	0	0	0	0	0	0	0	21	0	0
ASV1671	d__Bacteria; p__Spirochaetota; c__Spirochaetia; o__Spirochaetales; f__Spirochaetaceae; g__Treponema	0	0	0	0	0	0	0	0	0	0	0	0	0	0	0	0	0	0	0	0	0	0	16	11
ASV1672	d__Bacteria; p__Bacteroidota; c__Bacteroidia; o__Bacteroidales; f__Prevotellaceae; g__Prevotella; s__uncultured bacterium	0	24	0	0	0	0	0	0	0	0	0	0	0	0	0	0	0	0	0	0	0	0	0	0
ASV1673	d__Bacteria; p__Bacteroidota; c__Bacteroidia; o__Bacteroidales; f__Prevotellaceae; g__Prevotellaceae UCG-003; s__uncultured bacterium	0	23	0	0	0	0	0	0	0	0	0	0	0	0	0	0	0	0	0	0	0	0	0	0
ASV1674	d__Bacteria; p__Bacteroidota; c__Bacteroidia; o__Bacteroidales; f__F082; g__norank; s__uncultured rumen bacterium	0	8	6	0	0	0	0	0	0	0	0	0	5	0	0	0	0	0	0	0	0	0	8	0
ASV1675	d__Bacteria; p__Bacteroidota; c__Bacteroidia; o__Bacteroidales; f__Bacteroidales UCG-001; g__norank; s__uncultured bacterium	0	14	0	0	7	0	0	0	0	0	0	0	0	0	0	0	0	0	0	0	0	0	0	0
ASV1676	d__Bacteria; p__Firmicutes; c__Clostridia; o__Oscillospirales; f__[Eubacterium] coprostanoligenes group; g__norank; s__uncultured rumen bacterium	0	0	25	0	0	0	0	0	0	0	0	0	0	0	0	0	0	0	0	0	0	0	0	0
ASV1677	d__Bacteria; p__Bacteroidota; c__Bacteroidia; o__Bacteroidales; f__Prevotellaceae; g__Prevotella; s__uncultured rumen bacterium	0	0	0	17	0	0	0	0	0	0	0	0	0	0	0	0	0	0	0	0	0	0	0	0
ASV1678	d__Bacteria; p__Spirochaetota; c__Spirochaetia; o__Spirochaetales; f__Spirochaetaceae; g__Treponema; s__uncultured bacterium	0	0	0	19	0	0	0	0	0	0	0	0	0	0	0	0	0	0	0	0	0	0	0	0
ASV1679	d__Bacteria; p__Firmicutes; c__Negativicutes; o__Veillonellales-Selenomonadales; f__Selenomonadaceae; g__Selenomonas; s__Selenomonas ruminantium subsp. lactilytica TAM6421	0	0	0	0	0	17	0	0	0	0	0	0	0	0	0	0	0	0	0	0	0	0	0	0
ASV1680	d__Bacteria; p__Bacteroidota; c__Bacteroidia; o__Bacteroidales; f__Prevotellaceae; g__Prevotella; s__uncultured rumen bacterium	0	0	0	0	0	0	14	0	0	0	0	0	0	0	0	0	0	0	0	0	12	0	0	0
ASV1681	d__Bacteria; p__Bacteroidota; c__Bacteroidia; o__Bacteroidales; f__Prevotellaceae; g__Prevotella; s__uncultured rumen bacterium	0	0	0	0	0	0	0	19	0	0	0	0	0	0	0	0	0	0	0	0	0	7	0	0
ASV1682	d__Bacteria; p__Firmicutes; c__Clostridia; o__Oscillospirales; f__Oscillospiraceae; g__Papillibacter; s__uncultured rumen bacterium	0	0	0	0	0	0	0	28	0	0	0	0	0	0	0	0	0	0	0	0	0	0	0	0
ASV1683	d__Bacteria; p__Firmicutes; c__Clostridia; o__Clostridia UCG-014; f__norank; g__norank; s__uncultured rumen bacterium	0	0	0	0	0	0	0	8	0	0	0	0	0	0	0	0	0	0	0	0	3	0	0	12
ASV1684	d__Bacteria; p__Firmicutes; c__Clostridia; o__Lachnospirales; f__Lachnospiraceae; g__Roseburia; s__uncultured rumen bacterium	0	0	0	0	0	0	0	0	0	0	0	9	0	0	0	8	0	0	0	0	5	0	0	0
ASV1685	d__Bacteria; p__Bacteroidota; c__Bacteroidia; o__Bacteroidales; f__Prevotellaceae; g__Prevotella; s__uncultured rumen bacterium	0	0	0	0	0	0	0	0	0	0	0	23	0	0	0	0	0	0	0	0	0	0	0	0
ASV1686	d__Bacteria; p__Firmicutes; c__Clostridia; o__Oscillospirales; f__Ruminococcaceae; g__Ruminococcus; s__uncultured bacterium	0	0	0	0	0	0	0	0	0	0	0	0	19	0	0	0	0	0	0	0	0	0	0	0
ASV1687	d__Bacteria; p__Firmicutes; c__Clostridia; o__Lachnospirales; f__Lachnospiraceae; g__Blautia; s__uncultured rumen bacterium	0	0	0	0	0	0	0	0	0	0	0	0	0	0	37	0	0	0	0	0	0	0	0	0
ASV1688	d__Bacteria; p__Bacteroidota; c__Bacteroidia; o__Bacteroidales; f__Prevotellaceae; g__Prevotella; s__uncultured rumen bacterium	0	0	0	0	0	0	0	0	0	0	0	0	0	0	37	0	0	0	0	0	0	0	0	0
ASV1689	d__Bacteria; p__Firmicutes; c__Clostridia; o__Lachnospirales; f__Lachnospiraceae; g__Marvinbryantia; s__uncultured bacterium	0	0	0	0	0	0	0	0	0	0	0	0	0	0	16	0	0	0	13	0	0	0	0	0
ASV1690	d__Bacteria; p__Firmicutes; c__Clostridia; o__Christensenellales; f__Christensenellaceae; g__Christensenellaceae R-7 group; s__uncultured bacterium	0	0	0	0	0	0	0	0	0	0	0	0	0	0	0	27	0	0	0	0	0	0	0	0
ASV1691	d__Bacteria; p__Bacteroidota; c__Bacteroidia; o__Bacteroidales; f__Rikenellaceae; g__Rikenellaceae RC9 gut group; s__uncultured rumen bacterium	0	0	0	0	0	0	0	0	0	0	0	0	0	0	0	26	0	0	0	0	0	0	0	0
ASV1692	d__Bacteria; p__Firmicutes; c__Clostridia; o__Lachnospirales; f__Lachnospiraceae; g__Acetitomaculum; s__uncultured bacterium	0	0	0	0	0	0	0	0	0	0	0	0	0	0	0	0	24	0	0	0	0	0	0	0
ASV1693	d__Bacteria; p__Bacteroidota; c__Bacteroidia; o__Bacteroidales; f__Rikenellaceae; g__Rikenellaceae RC9 gut group; s__uncultured bacterium	0	0	0	0	0	0	0	0	0	0	0	0	0	0	0	0	12	0	0	0	5	0	0	0
ASV1694	d__Bacteria; p__Patescibacteria; c__Saccharimonadia; o__Saccharimonadales; f__Saccharimonadaceae; g__Candidatus Saccharimonas; s__uncultured rumen bacterium	0	0	0	0	0	0	0	0	0	0	0	0	0	0	0	0	0	0	0	0	0	0	0	17
ASV1695	d__Bacteria; p__Bacteroidota; c__Bacteroidia; o__Bacteroidales; f__F082; g__norank; s__uncultured rumen bacterium	0	0	0	0	0	0	0	0	0	0	0	0	0	0	0	0	0	0	0	0	0	0	0	22
ASV1696	d__Bacteria; p__Firmicutes; c__Clostridia; o__Lachnospirales; f__Lachnospiraceae; g__Lachnospiraceae NK3A20 group; s__uncultured bacterium	0	0	0	0	0	0	0	0	0	0	0	0	0	0	0	0	0	0	0	0	0	0	0	18
ASV1697	d__Bacteria; p__Firmicutes; c__Clostridia; o__Clostridia vadinBB60 group; f__norank; g__norank; s__uncultured rumen bacterium	6	0	0	0	0	2	0	7	0	0	0	0	0	0	0	0	0	0	0	0	6	0	0	0
ASV1698	d__Bacteria; p__Firmicutes; c__Clostridia; o__Oscillospirales; f__[Clostridium] methylpentosum group; g__norank; s__uncultured bacterium	0	30	0	0	0	0	0	0	0	0	0	0	0	0	0	0	0	0	0	0	0	0	0	0
ASV1699	d__Bacteria; p__Bacteroidota; c__Bacteroidia; o__Bacteroidales; f__Bacteroidales UCG-001; g__norank; s__uncultured rumen bacterium	0	20	0	0	0	0	0	0	0	0	0	0	0	0	0	0	0	0	0	0	0	0	0	0
ASV1700	d__Bacteria; p__Cyanobacteria; c__Vampirivibrionia; o__Gastranaerophilales; f__norank; g__norank; s__uncultured bacterium	0	0	33	0	0	0	0	0	0	0	0	0	0	0	0	0	0	0	0	0	0	0	0	0
ASV1701	d__Bacteria; p__Bacteroidota; c__Bacteroidia; o__Sphingobacteriales; f__Sphingobacteriaceae; g__Sphingobacterium; s__uncultured bacterium	0	0	0	7	0	0	0	0	0	0	0	0	0	0	0	0	0	4	0	0	0	0	0	4
ASV1702	d__Bacteria; p__Firmicutes; c__Bacilli; o__RF39; f__norank; g__norank; s__uncultured bacterium	0	0	0	0	5	0	0	0	0	0	0	0	17	0	0	0	0	0	0	0	0	0	0	0
ASV1703	d__Bacteria; p__Bacteroidota; c__Bacteroidia; o__Bacteroidales; f__Prevotellaceae; g__Alloprevotella; s__uncultured bacterium	0	0	0	0	0	0	0	12	0	0	0	0	0	0	0	0	0	0	0	0	3	0	0	0
ASV1704	d__Bacteria; p__Bacteroidota; c__Bacteroidia; o__Bacteroidales; f__Prevotellaceae; g__Prevotella; s__uncultured bacterium	0	0	0	0	0	0	0	24	0	0	0	0	0	0	0	0	0	0	0	0	0	0	0	0
ASV1705	d__Bacteria; p__Firmicutes; c__Clostridia; o__Lachnospirales; f__Lachnospiraceae; g__Lachnospiraceae NK3A20 group; s__uncultured bacterium	0	0	0	0	0	0	0	0	0	0	0	6	10	0	0	0	0	0	0	0	4	0	0	0
ASV1706	d__Bacteria; p__Firmicutes; c__Clostridia; o__Oscillospirales; f__[Eubacterium] coprostanoligenes group; g__norank; s__uncultured rumen bacterium	0	0	0	0	0	0	0	0	0	0	0	28	0	0	0	0	0	0	0	0	0	0	0	0
ASV1707	d__Bacteria; p__Bacteroidota; c__Bacteroidia; o__Bacteroidales; f__F082; g__norank; s__uncultured rumen bacterium	0	0	0	0	0	0	0	0	0	0	0	0	20	0	0	0	0	0	0	0	0	0	0	0
ASV1708	d__Bacteria; p__Bacteroidota; c__Bacteroidia; o__Bacteroidales; f__F082; g__norank; s__uncultured rumen bacterium	0	0	0	0	0	0	0	0	0	0	0	0	10	0	0	0	0	9	0	0	0	0	0	0
ASV1709	d__Bacteria; p__Firmicutes; c__Bacilli; o__Acholeplasmatales; f__Acholeplasmataceae; g__Anaeroplasma	0	0	0	0	0	0	0	0	0	0	0	0	9	0	0	0	0	0	0	0	7	0	0	0
ASV1710	d__Bacteria; p__Bacteroidota; c__Bacteroidia; o__Bacteroidales; f__Prevotellaceae; g__Prevotella; s__uncultured rumen bacterium	0	0	0	0	0	0	0	0	0	0	0	0	27	0	0	0	0	0	0	0	0	0	0	0
ASV1711	d__Bacteria; p__Firmicutes; c__Clostridia; o__Lachnospirales; f__Lachnospiraceae; g__[Eubacterium] ruminantium group; s__uncultured bacterium	0	0	0	0	0	0	0	0	0	0	0	0	0	21	0	0	0	0	0	0	0	0	0	0
ASV1712	d__Bacteria; p__Firmicutes; c__Clostridia; o__Oscillospirales; f__Ruminococcaceae; g__uncultured; s__uncultured rumen bacterium	0	0	0	0	0	0	0	0	0	0	0	0	0	0	36	0	0	0	0	0	0	0	0	0
ASV1713	d__Bacteria; p__Spirochaetota; c__Spirochaetia; o__Spirochaetales; f__Spirochaetaceae; g__Treponema	0	0	0	0	0	0	0	0	0	0	0	0	0	0	36	0	0	0	0	0	0	0	0	0
ASV1714	d__Bacteria; p__Firmicutes; c__Clostridia; o__Oscillospirales; f__Ruminococcaceae; g__Ruminococcus; s__uncultured rumen bacterium	0	0	0	0	0	0	0	0	0	0	0	0	0	0	36	0	0	0	0	0	0	0	0	0
ASV1715	d__Bacteria; p__Firmicutes; c__Clostridia; o__Lachnospirales; f__Lachnospiraceae; g__[Eubacterium] ruminantium group	0	0	0	0	0	0	0	0	0	0	0	0	0	0	36	0	0	0	0	0	0	0	0	0
ASV1716	d__Bacteria; p__Bacteroidota; c__Bacteroidia; o__Bacteroidales; f__Prevotellaceae; g__Prevotellaceae UCG-001	0	0	0	0	0	0	0	0	0	0	0	0	0	0	0	12	0	0	10	0	0	0	0	0
ASV1717	d__Bacteria; p__Bacteroidota; c__Bacteroidia; o__Bacteroidales; f__uncultured; g__norank; s__uncultured bacterium	0	0	0	0	0	0	0	0	0	0	0	0	0	0	0	0	0	4	0	0	0	19	0	0
ASV1718	d__Bacteria; p__Firmicutes; c__Clostridia; o__Oscillospirales; f__Ruminococcaceae; g__Ruminococcus; s__uncultured bacterium	0	0	0	0	0	0	0	0	0	0	0	0	0	0	0	0	0	19	0	0	0	0	0	0
ASV1719	d__Bacteria; p__Firmicutes; c__Clostridia; o__Lachnospirales; f__Lachnospiraceae; g__Lachnospiraceae NK3A20 group; s__uncultured bacterium	0	0	0	0	0	0	0	0	0	0	0	0	0	0	0	0	0	20	0	0	0	0	0	0
ASV1720	d__Bacteria; p__Firmicutes; c__Clostridia; o__Oscillospirales; f__Ruminococcaceae; g__Ruminococcus; s__uncultured rumen bacterium	0	0	0	0	0	0	0	0	0	0	0	0	0	0	0	0	0	21	0	0	0	0	0	0
ASV1721	d__Bacteria; p__Bacteroidota; c__Bacteroidia; o__Bacteroidales; f__Prevotellaceae; g__Prevotellaceae UCG-003; s__uncultured rumen bacterium	0	0	0	0	0	0	0	0	0	0	0	0	0	0	0	0	0	0	27	0	0	0	0	0
ASV1722	d__Bacteria; p__Firmicutes; c__Clostridia; o__Lachnospirales; f__Lachnospiraceae; g__Lachnospiraceae XPB1014 group; s__uncultured bacterium	0	0	0	0	0	0	0	0	0	0	0	0	0	0	0	0	0	0	0	31	0	0	0	0
ASV1723	d__Bacteria; p__Firmicutes; c__Clostridia; o__Lachnospirales; f__Lachnospiraceae; g__Lachnospiraceae NK4A136 group; s__uncultured bacterium	0	0	0	0	0	0	0	0	0	0	0	0	0	0	0	0	0	0	0	0	21	0	0	0
ASV1724	d__Bacteria; p__Bacteroidota; c__Bacteroidia; o__Bacteroidales; f__Muribaculaceae; g__norank; s__uncultured rumen bacterium	0	0	0	0	0	0	0	0	0	0	0	0	0	0	0	0	0	0	0	0	0	20	0	0
ASV1725	d__Bacteria; p__Bacteroidota; c__Bacteroidia; o__Bacteroidales; f__F082; g__norank; s__uncultured rumen bacterium	0	0	0	0	0	0	0	0	0	0	0	0	0	0	0	0	0	0	0	0	0	23	0	0
ASV1726	d__Bacteria; p__Cyanobacteria; c__Vampirivibrionia; o__Gastranaerophilales; f__norank; g__norank; s__uncultured rumen bacterium	9	0	0	7	0	0	0	0	0	0	0	0	0	0	0	0	0	0	0	0	0	0	0	0
ASV1727	d__Bacteria; p__Bacteroidota; c__Bacteroidia; o__Bacteroidales; f__Prevotellaceae; g__Prevotella; s__uncultured rumen bacterium	0	26	0	0	0	0	0	0	0	0	0	0	0	0	0	0	0	0	0	0	0	0	0	0
ASV1728	d__Bacteria; p__Bacteroidota; c__Bacteroidia; o__Bacteroidales; f__Prevotellaceae; g__Prevotella; s__uncultured rumen bacterium	0	0	19	0	0	0	0	0	0	0	0	0	0	0	0	0	0	0	0	0	0	0	9	1
ASV1729	d__Bacteria; p__Firmicutes; c__Clostridia; o__Oscillospirales; f__Ruminococcaceae; g__Ruminococcus; s__Ruminococcus albus	0	0	30	0	0	0	0	0	0	0	0	0	0	0	0	0	0	0	0	0	0	0	0	0
ASV1730	d__Bacteria; p__Proteobacteria; c__Gammaproteobacteria; o__Enterobacterales; f__Succinivibrionaceae; g__Ruminobacter; s__uncultured rumen bacterium	0	0	10	0	0	0	0	0	0	0	0	0	10	0	0	0	0	0	0	0	0	0	0	7
ASV1731	d__Bacteria; p__Bacteroidota; c__Bacteroidia; o__Bacteroidales; f__F082; g__norank; s__uncultured rumen bacterium	0	0	28	0	0	0	0	0	0	0	0	0	0	0	0	0	0	0	0	0	0	0	0	0
ASV1732	d__Bacteria; p__Spirochaetota; c__Spirochaetia; o__Spirochaetales; f__Spirochaetaceae; g__Treponema; s__uncultured rumen bacterium	0	0	0	6	0	0	0	4	0	0	0	0	0	0	0	0	0	0	0	0	3	0	0	2
ASV1733	d__Bacteria; p__Firmicutes; c__Clostridia; o__Lachnospirales; f__Lachnospiraceae; g__Lachnospiraceae UCG-001; s__uncultured bacterium	0	0	0	0	0	0	0	19	0	0	0	0	0	0	0	0	0	0	0	0	0	0	0	0
ASV1734	d__Bacteria; p__Bacteroidota; c__Bacteroidia; o__Bacteroidales; f__Rikenellaceae; g__Rikenellaceae RC9 gut group; s__uncultured rumen bacterium	0	0	0	0	0	0	0	0	11	0	0	0	0	0	0	0	0	0	0	0	5	0	0	0
ASV1735	d__Bacteria; p__Bacteroidota; c__Bacteroidia; o__Bacteroidales; f__Prevotellaceae; g__Prevotellaceae NK3B31 group; s__uncultured rumen bacterium	0	0	0	0	0	0	0	0	0	0	13	11	0	0	0	0	0	0	0	0	0	0	0	2
ASV1736	d__Bacteria; p__Bacteroidota; c__Bacteroidia; o__Bacteroidales; f__Muribaculaceae; g__norank; s__uncultured bacterium	0	0	0	0	0	0	0	0	0	0	23	0	0	0	0	0	0	0	0	0	0	0	0	0
ASV1737	d__Bacteria; p__Firmicutes; c__Clostridia; o__Lachnospirales; f__Defluviitaleaceae; g__Defluviitaleaceae UCG-011; s__uncultured bacterium	0	0	0	0	0	0	0	0	0	0	0	27	0	0	0	0	0	0	0	0	0	0	0	0
ASV1738	d__Bacteria; p__Bacteroidota; c__Bacteroidia; o__Bacteroidales; f__Prevotellaceae; g__Prevotella; s__uncultured rumen bacterium	0	0	0	0	0	0	0	0	0	0	0	24	0	0	0	0	0	0	0	0	0	0	0	0
ASV1739	d__Bacteria; p__Firmicutes; c__Clostridia; o__Lachnospirales; f__Lachnospiraceae; g__Shuttleworthia; s__uncultured bacterium	0	0	0	0	0	0	0	0	0	0	0	0	0	0	6	1	0	7	0	0	0	0	0	8
ASV1740	d__Bacteria; p__Bacteroidota; c__Bacteroidia; o__Bacteroidales; f__Muribaculaceae; g__norank; s__uncultured rumen bacterium	0	0	0	0	0	0	0	0	0	0	0	0	0	0	0	19	0	0	0	0	5	0	0	0
ASV1741	d__Bacteria; p__Firmicutes; c__Clostridia; o__Christensenellales; f__Christensenellaceae; g__Christensenellaceae R-7 group; s__uncultured bacterium	0	0	0	0	0	0	0	0	0	0	0	0	0	0	0	0	0	22	0	0	0	0	0	0
ASV1742	d__Bacteria; p__Firmicutes; c__Clostridia; o__Lachnospirales; f__Lachnospiraceae; g__Lachnospiraceae ND3007 group	0	0	0	0	0	0	0	0	0	0	0	0	0	0	0	0	0	0	24	0	0	0	0	0
ASV1743	d__Bacteria; p__Firmicutes; c__Clostridia; o__Peptostreptococcales-Tissierellales; f__Anaerovoracaceae; g__[Eubacterium] nodatum group; s__uncultured bacterium	0	0	0	0	0	0	0	0	0	0	0	0	0	0	0	0	0	0	17	0	0	0	8	0
ASV1744	d__Bacteria; p__Firmicutes; c__Clostridia; o__Christensenellales; f__Christensenellaceae; g__Christensenellaceae R-7 group	0	0	0	0	0	0	0	0	0	0	0	0	0	0	0	0	0	0	29	0	0	0	0	0
ASV1745	d__Bacteria	0	0	0	0	0	0	0	0	0	0	0	0	0	0	0	0	0	0	0	0	20	0	0	0
ASV1746	d__Bacteria; p__Firmicutes; c__Clostridia; o__Clostridia UCG-014; f__norank; g__norank; s__uncultured bacterium	0	0	0	0	0	0	0	0	0	0	0	0	0	0	0	0	0	0	0	0	16	0	0	0
ASV1747	d__Bacteria; p__Firmicutes; c__Clostridia; o__Lachnospirales; f__Lachnospiraceae; g__Butyrivibrio	0	0	0	0	0	0	0	0	0	0	0	0	0	0	0	0	0	0	0	0	18	0	0	0
ASV1748	d__Bacteria; p__Bacteroidota; c__Bacteroidia; o__Bacteroidales; f__Prevotellaceae; g__Prevotella; s__uncultured rumen bacterium	0	0	0	0	0	0	0	0	0	0	0	0	0	0	0	0	0	0	0	0	0	22	0	0
ASV1749	d__Bacteria; p__Bacteroidota; c__Bacteroidia; o__Bacteroidales; f__Prevotellaceae; g__Prevotella; s__uncultured bacterium	0	0	0	0	0	0	0	0	0	0	0	0	0	0	0	0	0	0	0	0	0	24	0	0
ASV1750	d__Bacteria; p__Bacteroidota; c__Bacteroidia; o__Bacteroidales; f__Prevotellaceae; g__Prevotella; s__uncultured rumen bacterium	0	0	0	0	0	0	0	0	0	0	0	0	0	0	0	0	0	0	0	0	0	0	0	21
ASV1751	d__Bacteria; p__Bacteroidota; c__Bacteroidia; o__Bacteroidales; f__F082; g__norank; s__uncultured bacterium	0	0	0	0	0	0	0	0	0	0	0	0	0	0	0	0	0	0	0	0	0	0	0	21
ASV1752	d__Bacteria; p__Firmicutes; c__Clostridia; o__Lachnospirales; f__Lachnospiraceae; g__Lachnospiraceae NK4A136 group	0	0	0	0	0	0	0	0	0	0	0	0	0	0	0	0	0	0	0	0	0	0	0	23
ASV1753	d__Bacteria; p__Bacteroidota; c__Bacteroidia; o__Bacteroidales; f__Prevotellaceae; g__Prevotellaceae YAB2003 group; s__uncultured rumen bacterium	0	0	0	0	0	0	0	0	0	0	0	0	0	0	0	0	0	0	0	0	0	0	0	24
ASV1754	d__Bacteria; p__Firmicutes; c__Bacilli; o__Erysipelotrichales; f__Erysipelatoclostridiaceae; g__Sharpea	25	0	0	0	0	0	0	0	0	0	0	0	0	0	0	0	0	0	0	0	0	0	0	0
ASV1755	d__Bacteria; p__Firmicutes; c__Clostridia; o__Peptostreptococcales-Tissierellales; f__Anaerovoracaceae; g__Anaerovorax; s__uncultured bacterium	7	0	0	0	0	0	3	0	0	0	0	0	0	8	0	0	0	0	0	0	0	0	0	0
ASV1756	d__Bacteria; p__Bacteroidota; c__Bacteroidia; o__Bacteroidales; f__Prevotellaceae; g__Prevotellaceae UCG-001; s__uncultured rumen bacterium	0	7	0	0	0	0	0	0	0	0	0	0	0	0	10	0	0	0	0	9	0	0	0	0
ASV1757	d__Bacteria; p__Bacteroidota; c__Bacteroidia; o__Bacteroidales; f__Prevotellaceae; g__Prevotella; s__uncultured rumen bacterium	0	14	12	0	0	0	0	0	0	0	0	0	0	0	0	0	0	0	0	0	0	0	0	0
ASV1758	d__Bacteria; p__Bacteroidota; c__Bacteroidia; o__Bacteroidales; f__Prevotellaceae; g__Prevotellaceae UCG-003; s__uncultured rumen bacterium	0	5	0	0	0	0	0	9	0	0	0	0	0	0	0	0	5	0	0	0	0	0	0	0
ASV1759	d__Bacteria; p__Bacteroidota; c__Bacteroidia; o__Bacteroidales; f__F082; g__norank; s__uncultured bacterium	0	0	12	0	0	0	0	0	0	0	0	0	9	0	0	0	0	0	0	0	0	0	0	0
ASV1760	d__Bacteria; p__Firmicutes; c__Clostridia; o__Oscillospirales; f__Hungateiclostridiaceae; g__Saccharofermentans; s__uncultured rumen bacterium	0	0	29	0	0	0	0	0	0	0	0	0	0	0	0	0	0	0	0	0	0	0	0	0
ASV1761	d__Bacteria; p__Firmicutes; c__Clostridia; o__Lachnospirales; f__Lachnospiraceae; g__Lachnospiraceae ND3007 group	0	0	8	0	0	0	0	0	0	0	0	0	0	0	0	0	0	3	0	6	1	4	0	0
ASV1762	d__Bacteria; p__Patescibacteria; c__Gracilibacteria; o__Absconditabacteriales (SR1); f__norank; g__norank	0	0	14	0	0	0	0	0	0	0	0	0	0	0	0	0	0	0	0	0	8	0	0	0
ASV1763	d__Bacteria; p__Bacteroidota; c__Bacteroidia; o__Bacteroidales; f__Prevotellaceae; g__Prevotella; s__uncultured rumen bacterium	0	0	0	5	0	0	0	5	0	0	0	0	0	0	0	0	0	0	0	0	0	0	0	0
ASV1764	d__Bacteria; p__Spirochaetota; c__Spirochaetia; o__Spirochaetales; f__Spirochaetaceae; g__Treponema; s__uncultured rumen bacterium	0	0	0	5	0	0	0	13	0	0	0	0	0	0	0	0	0	0	0	0	0	0	0	0
ASV1765	d__Bacteria; p__Firmicutes; c__Clostridia; o__Oscillospirales; f__Ruminococcaceae; g__Ruminococcus; s__uncultured rumen bacterium	0	0	0	14	0	0	0	0	0	0	0	0	0	0	0	0	0	0	0	0	0	0	0	0
ASV1766	d__Bacteria; p__Firmicutes; c__Clostridia; o__Oscillospirales; f__Ruminococcaceae; g__Ruminococcus; s__uncultured rumen bacterium	0	0	0	13	0	9	0	0	0	0	0	0	0	0	0	0	0	0	0	0	0	0	0	0
ASV1767	d__Bacteria; p__Bacteroidota; c__Bacteroidia; o__Bacteroidales; f__uncultured; g__norank; s__uncultured bacterium	0	0	0	0	14	0	0	0	0	0	0	0	0	0	0	0	0	0	0	0	0	0	0	0
ASV1768	d__Bacteria; p__Firmicutes; c__Clostridia; o__Oscillospirales; f__uncultured; g__norank; s__uncultured rumen bacterium	0	0	0	0	4	0	0	0	0	0	0	7	0	0	17	0	0	0	0	0	0	0	0	0
ASV1769	d__Bacteria; p__Firmicutes; c__Negativicutes; o__Veillonellales-Selenomonadales; f__Selenomonadaceae; g__Mitsuokella; s__Mitsuokella multacida DSM 20544	0	0	0	0	3	0	0	0	0	0	0	0	0	0	0	0	18	0	0	0	0	0	0	0
ASV1770	d__Bacteria; p__Firmicutes; c__Clostridia; o__Oscillospirales; f__UCG-010; g__norank; s__uncultured bacterium	0	0	0	0	0	0	0	2	0	0	0	0	10	0	7	0	0	0	7	0	0	0	0	0
ASV1771	d__Bacteria; p__Bacteroidota; c__Bacteroidia; o__Bacteroidales; f__Prevotellaceae; g__Prevotella; s__uncultured rumen bacterium	0	0	0	0	0	0	0	0	0	0	0	22	0	0	0	0	0	0	0	0	0	0	0	0
ASV1772	d__Bacteria; p__Firmicutes; c__Clostridia; o__Clostridia UCG-014; f__norank; g__norank; s__uncultured bacterium	0	0	0	0	0	0	0	0	0	0	0	21	0	0	0	0	0	0	0	0	0	0	0	0
ASV1773	d__Bacteria; p__Firmicutes; c__Clostridia; o__Oscillospirales; f__Oscillospiraceae; g__NK4A214 group; s__uncultured bacterium	0	0	0	0	0	0	0	0	0	0	0	0	18	0	0	0	0	0	0	0	0	0	0	0
ASV1774	d__Bacteria; p__Bacteroidota; c__Bacteroidia; o__Bacteroidales; f__Muribaculaceae; g__norank; s__uncultured bacterium	0	0	0	0	0	0	0	0	0	0	0	0	0	0	34	0	0	0	0	0	0	0	0	0
ASV1775	d__Bacteria; p__Firmicutes; c__Clostridia; o__Lachnospirales; f__Lachnospiraceae; g__Lachnospiraceae NK3A20 group; s__uncultured bacterium	0	0	0	0	0	0	0	0	0	0	0	0	0	0	0	0	0	0	25	0	0	0	0	0
ASV1776	Unclassified	0	0	0	0	0	0	0	0	0	0	0	0	0	0	0	0	0	0	15	0	0	8	0	0
ASV1777	d__Bacteria; p__Bacteroidota; c__Bacteroidia; o__Bacteroidales; f__Prevotellaceae; g__Prevotellaceae UCG-003; s__uncultured rumen bacterium	0	0	0	0	0	0	0	0	0	0	0	0	0	0	0	0	0	0	0	29	0	0	0	0
ASV1778	d__Bacteria; p__Firmicutes; c__Clostridia; o__Oscillospirales; f__[Eubacterium] coprostanoligenes group; g__norank	0	0	0	0	0	0	0	0	0	0	0	0	0	0	0	0	0	0	0	0	0	0	0	18
ASV1779	d__Bacteria; p__Firmicutes; c__Clostridia; o__Christensenellales; f__Christensenellaceae; g__Christensenellaceae R-7 group; s__uncultured bacterium	0	0	0	0	0	0	0	0	0	0	0	0	0	0	0	0	0	0	0	0	0	0	0	21
ASV1780	d__Bacteria; p__Bacteroidota; c__Bacteroidia; o__Bacteroidales; f__Prevotellaceae; g__Prevotellaceae UCG-001; s__uncultured bacterium	4	0	14	0	0	0	0	0	0	0	5	0	0	0	0	0	0	0	0	0	0	0	0	0
ASV1781	d__Bacteria; p__Bacteroidota; c__Bacteroidia; o__Bacteroidales; f__Bacteroidales RF16 group; g__norank; s__uncultured rumen bacterium	0	7	0	0	0	0	0	0	0	0	0	0	8	0	5	0	0	0	7	0	0	0	0	0
ASV1782	d__Bacteria; p__Bacteroidota; c__Bacteroidia; o__Bacteroidales; f__Muribaculaceae; g__norank; s__uncultured bacterium	0	17	0	0	0	0	0	0	0	0	0	0	0	0	0	0	0	0	0	0	0	0	0	0
ASV1783	d__Bacteria; p__Bacteroidota; c__Bacteroidia; o__Bacteroidales; f__Prevotellaceae; g__Prevotella; s__uncultured rumen bacterium	0	0	27	0	0	0	0	0	0	0	0	0	0	0	0	0	0	0	0	0	0	0	0	0
ASV1784	d__Bacteria; p__Bacteroidota; c__Bacteroidia; o__Bacteroidales; f__F082; g__norank; s__uncultured rumen bacterium	0	0	28	0	0	0	0	0	0	0	0	0	0	0	0	0	0	0	0	0	0	0	0	0
ASV1785	d__Bacteria; p__Firmicutes; c__Clostridia; o__Oscillospirales; f__Ruminococcaceae; g__uncultured; s__uncultured rumen bacterium	0	0	20	0	0	0	0	0	0	0	0	0	0	0	0	0	0	0	0	0	0	0	0	0
ASV1786	d__Bacteria; p__Firmicutes; c__Clostridia; o__Oscillospirales; f__Ruminococcaceae; g__Ruminococcus	0	0	0	21	0	0	0	0	0	0	0	0	0	0	0	0	0	0	0	0	0	0	0	0
ASV1787	d__Bacteria; p__Firmicutes; c__Clostridia; o__Oscillospirales; f__Oscillospiraceae; g__NK4A214 group; s__uncultured rumen bacterium	0	0	0	0	16	0	0	0	0	0	0	0	0	0	0	0	0	0	0	0	0	0	0	0
ASV1788	d__Bacteria; p__Firmicutes; c__Clostridia; o__Lachnospirales; f__Lachnospiraceae; g__Moryella; s__uncultured rumen bacterium	0	0	0	0	9	0	0	0	0	0	0	0	0	0	0	0	0	4	0	0	0	0	0	0
ASV1789	d__Bacteria; p__Firmicutes; c__Clostridia; o__Lachnospirales; f__Lachnospiraceae; g__[Eubacterium] xylanophilum group; s__uncultured bacterium	0	0	0	0	19	0	0	0	0	0	0	0	0	0	0	0	0	0	0	0	0	0	0	0
ASV1790	d__Bacteria; p__Bacteroidota; c__Bacteroidia; o__Bacteroidales; f__Prevotellaceae; g__Prevotella; s__uncultured rumen bacterium	0	0	0	0	0	20	0	0	0	0	0	0	0	0	0	0	0	0	0	0	0	0	0	0
ASV1791	d__Bacteria; p__Firmicutes; c__Clostridia; o__Lachnospirales; f__Lachnospiraceae; g__[Eubacterium] ruminantium group	0	0	0	0	0	0	0	20	0	0	0	0	0	0	0	0	0	0	0	0	0	0	0	0
ASV1792	d__Bacteria; p__Firmicutes; c__Clostridia; o__Christensenellales; f__Christensenellaceae; g__Christensenellaceae R-7 group; s__uncultured bacterium	0	0	0	0	0	0	0	13	0	0	0	0	0	0	0	0	0	0	0	0	0	0	0	0
ASV1793	d__Bacteria; p__Firmicutes; c__Clostridia; o__Clostridia UCG-014; f__norank; g__norank; s__uncultured bacterium	0	0	0	0	0	0	0	7	0	14	0	0	0	6	0	0	0	0	0	0	0	0	0	0
ASV1794	d__Bacteria; p__Firmicutes; c__Clostridia; o__Oscillospirales; f__[Eubacterium] coprostanoligenes group; g__norank; s__uncultured bacterium	0	0	0	0	0	0	0	0	0	0	20	0	0	0	0	0	0	0	0	0	0	0	0	0
ASV1795	d__Bacteria; p__Firmicutes; c__Clostridia; o__Oscillospirales; f__[Clostridium] methylpentosum group; g__norank; s__uncultured bacterium	0	0	0	0	0	0	0	0	0	0	0	0	20	0	0	0	0	0	0	0	0	0	0	0
ASV1796	d__Bacteria; p__Firmicutes; c__Negativicutes; o__Veillonellales-Selenomonadales; f__Selenomonadaceae; g__Mitsuokella	0	0	0	0	0	0	0	0	0	0	0	0	0	16	0	0	0	0	0	0	0	0	0	0
ASV1797	d__Bacteria; p__Firmicutes; c__Clostridia; o__Lachnospirales; f__Lachnospiraceae; g__Lachnospiraceae UCG-001; s__uncultured bacterium	0	0	0	0	0	0	0	0	0	0	0	0	0	22	0	0	0	0	0	0	0	0	0	0
ASV1798	d__Bacteria; p__Firmicutes; c__Clostridia; o__Lachnospirales; f__Defluviitaleaceae; g__Defluviitaleaceae UCG-011; s__uncultured rumen bacterium	0	0	0	0	0	0	0	0	0	0	0	0	0	0	33	0	0	0	0	0	0	0	0	0
ASV1799	d__Bacteria; p__Firmicutes; c__Clostridia; o__Oscillospirales; f__Oscillospiraceae; g__NK4A214 group; s__uncultured bacterium	0	0	0	0	0	0	0	0	0	0	0	0	0	0	12	0	0	0	0	0	0	0	20	0
ASV1800	d__Bacteria; p__Firmicutes; c__Clostridia; o__Christensenellales; f__Christensenellaceae; g__Christensenellaceae R-7 group; s__uncultured rumen bacterium	0	0	0	0	0	0	0	0	0	0	0	0	0	0	0	0	0	22	0	0	0	0	0	0
ASV1801	d__Bacteria; p__Bacteroidota; c__Bacteroidia; o__Bacteroidales; f__Rikenellaceae; g__Rikenellaceae RC9 gut group; s__uncultured bacterium	0	0	0	0	0	0	0	0	0	0	0	0	0	0	0	0	0	18	0	0	0	0	0	0
ASV1802	d__Bacteria; p__Firmicutes; c__Clostridia; o__Lachnospirales; f__Lachnospiraceae; g__Agathobacter	0	0	0	0	0	0	0	0	0	0	0	0	0	0	0	0	0	16	0	0	0	0	0	0
ASV1803	d__Bacteria; p__Bacteroidota; c__Bacteroidia; o__Bacteroidales; f__Prevotellaceae; g__Prevotella; s__uncultured rumen bacterium	0	0	0	0	0	0	0	0	0	0	0	0	0	0	0	0	0	15	0	0	0	0	0	0
ASV1804	d__Bacteria; p__Firmicutes; c__Bacilli; o__Erysipelotrichales; f__Erysipelatoclostridiaceae; g__UCG-004; s__uncultured bacterium	0	0	0	0	0	0	0	0	0	0	0	0	0	0	0	0	0	0	28	0	0	0	0	0
ASV1805	d__Bacteria; p__Proteobacteria; c__Alphaproteobacteria; o__Rickettsiales; f__Mitochondria; g__norank; s__uncultured rumen bacterium	0	0	0	0	0	0	0	0	0	0	0	0	0	0	0	0	0	0	0	31	0	0	0	0
ASV1806	d__Bacteria; p__Firmicutes; c__Clostridia; o__Clostridia UCG-014; f__norank; g__norank; s__uncultured bacterium	0	0	0	0	0	0	0	0	0	0	0	0	0	0	0	0	0	0	0	0	20	0	0	0
ASV1807	d__Bacteria; p__Bacteroidota; c__Bacteroidia; o__Bacteroidales; f__Prevotellaceae; g__Prevotellaceae UCG-001; s__uncultured bacterium	0	0	0	0	0	0	0	0	0	0	0	0	0	0	0	0	0	0	0	0	15	0	0	0
ASV1808	d__Bacteria; p__Bacteroidota; c__Bacteroidia; o__Bacteroidales; f__Prevotellaceae; g__Prevotella; s__uncultured rumen bacterium	0	0	0	0	0	0	0	0	0	0	0	0	0	0	0	0	0	0	0	0	19	0	0	0
ASV1809	d__Bacteria; p__Bacteroidota; c__Bacteroidia; o__Bacteroidales; f__uncultured; g__norank; s__uncultured bacterium	0	0	0	0	0	0	0	0	0	0	0	0	0	0	0	0	0	0	0	0	0	0	0	19
ASV1810	d__Bacteria; p__Firmicutes; c__Clostridia; o__Clostridia UCG-014; f__norank; g__norank; s__uncultured rumen bacterium	0	0	0	0	0	0	0	0	0	0	0	0	0	0	0	0	0	0	0	0	0	0	0	17
ASV1811	d__Bacteria; p__Bacteroidota; c__Bacteroidia; o__Bacteroidales; f__Rikenellaceae; g__Rikenellaceae RC9 gut group; s__uncultured rumen bacterium	19	0	0	0	0	0	0	0	0	0	0	0	0	0	0	0	0	0	0	0	0	0	0	0
ASV1812	d__Bacteria; p__Firmicutes; c__Clostridia; o__Lachnospirales; f__Lachnospiraceae; g__Lachnospiraceae FCS020 group	7	0	0	0	4	0	0	5	0	0	0	0	0	0	0	0	0	0	0	4	0	0	0	0
ASV1813	d__Bacteria; p__Firmicutes; c__Clostridia; o__Lachnospirales; f__Lachnospiraceae; g__Lachnoclostridium; s__uncultured bacterium	2	0	0	0	4	0	0	0	0	0	0	0	4	0	6	0	0	2	0	0	0	0	0	0
ASV1814	d__Bacteria; p__Bacteroidota; c__Bacteroidia; o__Bacteroidales; f__F082; g__norank; s__uncultured bacterium	0	14	0	0	0	0	0	0	0	0	0	0	0	0	0	0	0	0	0	0	0	0	0	0
ASV1815	d__Bacteria; p__Spirochaetota; c__Spirochaetia; o__Spirochaetales; f__Spirochaetaceae; g__Treponema; s__uncultured rumen bacterium	0	5	0	0	0	0	0	3	0	0	0	0	0	0	0	0	0	0	0	8	1	4	0	0
ASV1816	d__Bacteria; p__Firmicutes; c__Clostridia; o__Christensenellales; f__Christensenellaceae; g__Christensenellaceae R-7 group; s__uncultured rumen bacterium	0	0	28	0	0	0	0	0	0	0	0	0	0	0	0	0	0	0	0	0	0	0	0	0
ASV1817	d__Bacteria; p__Firmicutes; c__Clostridia; o__Oscillospirales; f__Ruminococcaceae; g__Ruminococcus; s__uncultured rumen bacterium	0	0	25	0	0	0	0	0	0	0	0	0	0	0	0	0	0	0	0	0	0	0	0	0
ASV1818	d__Bacteria; p__Bacteroidota; c__Bacteroidia; o__Bacteroidales; f__Prevotellaceae; g__Prevotellaceae NK3B31 group; s__uncultured rumen bacterium	0	0	25	0	0	0	0	0	0	0	0	0	0	0	0	0	0	0	0	0	0	0	0	0
ASV1819	d__Bacteria; p__Desulfobacterota; c__Desulfuromonadia; o__Bradymonadales; f__norank; g__norank; s__uncultured bacterium	0	0	0	16	0	0	0	0	0	0	0	0	0	0	0	0	0	0	0	0	0	0	0	0
ASV1820	d__Bacteria; p__Spirochaetota; c__Spirochaetia; o__Spirochaetales; f__Spirochaetaceae; g__Treponema; s__uncultured Treponema sp.	0	0	0	7	1	0	0	0	0	9	0	0	0	3	0	0	0	0	0	0	0	0	0	0
ASV1821	d__Bacteria; p__Bacteroidota; c__Bacteroidia; o__Bacteroidales; f__Prevotellaceae; g__Prevotellaceae UCG-003	0	0	0	20	0	0	0	0	0	0	0	0	0	0	0	0	0	0	0	0	0	0	0	0
ASV1822	d__Bacteria; p__Firmicutes; c__Clostridia; o__Oscillospirales; f__Ruminococcaceae; g__Ruminococcus; s__uncultured rumen bacterium	0	0	0	0	13	0	0	0	0	0	0	12	0	0	0	0	0	0	0	0	0	0	0	0
ASV1823	d__Bacteria; p__Firmicutes; c__Clostridia; o__Peptostreptococcales-Tissierellales; f__Anaerovoracaceae; g__Anaerovorax; s__uncultured bacterium	0	0	0	0	12	0	0	0	0	0	0	0	0	0	0	0	0	0	0	0	0	0	0	0
ASV1824	d__Bacteria; p__Proteobacteria; c__Gammaproteobacteria; o__Burkholderiales; f__Comamonadaceae; g__Comamonas; s__Comamonas kerstersii	0	0	0	0	8	0	0	0	11	0	0	0	0	0	0	0	0	0	0	0	0	0	0	0
ASV1825	d__Bacteria; p__Cyanobacteria; c__Vampirivibrionia; o__Gastranaerophilales; f__norank; g__norank; s__uncultured rumen bacterium	0	0	0	0	19	0	0	0	0	0	0	0	0	0	0	0	0	0	0	0	0	0	0	0
ASV1826	d__Bacteria; p__Firmicutes; c__Clostridia; o__Clostridia UCG-014; f__norank; g__norank; s__uncultured bacterium	0	0	0	0	13	0	0	0	0	0	0	0	0	0	0	0	0	0	0	0	0	0	0	0
ASV1827	d__Bacteria; p__Bacteroidota; c__Bacteroidia; o__Bacteroidales; f__Prevotellaceae; g__Prevotella; s__uncultured rumen bacterium	0	0	0	0	10	0	0	0	0	0	0	0	0	0	0	0	0	0	0	0	0	0	0	0
ASV1828	d__Bacteria; p__Bacteroidota; c__Bacteroidia; o__Bacteroidales; f__Prevotellaceae; g__Prevotellaceae NK3B31 group; s__uncultured rumen bacterium	0	0	0	0	0	7	0	0	0	0	0	0	12	0	0	0	0	0	0	0	0	0	0	0
ASV1829	d__Bacteria; p__Bacteroidota; c__Bacteroidia; o__Bacteroidales; f__Prevotellaceae; g__Prevotella; s__uncultured bacterium	0	0	0	0	0	0	11	0	0	3	0	0	0	0	0	0	0	5	0	0	0	0	0	0
ASV1830	d__Bacteria; p__Proteobacteria; c__Alphaproteobacteria; o__Rhodospirillales; f__uncultured; g__norank; s__uncultured bacterium	0	0	0	0	0	0	0	19	0	0	0	0	0	0	0	0	0	0	0	0	0	0	0	0
ASV1831	d__Bacteria; p__Spirochaetota; c__Spirochaetia; o__Spirochaetales; f__Spirochaetaceae; g__Treponema; s__uncultured bacterium	0	0	0	0	0	0	0	12	0	0	0	0	7	0	0	0	0	0	0	0	0	0	0	0
ASV1832	d__Bacteria; p__Firmicutes; c__Clostridia; o__Christensenellales; f__Christensenellaceae; g__Christensenellaceae R-7 group; s__uncultured bacterium	0	0	0	0	0	0	0	16	0	0	0	0	0	0	0	0	0	0	0	0	0	0	0	0
ASV1833	d__Bacteria; p__Firmicutes; c__Bacilli; o__RF39; f__norank; g__norank; s__uncultured bacterium	0	0	0	0	0	0	0	23	0	0	0	0	0	0	0	0	0	0	0	0	0	0	0	0
ASV1834	d__Bacteria; p__Spirochaetota; c__Spirochaetia; o__Spirochaetales; f__Spirochaetaceae; g__Treponema; s__uncultured rumen bacterium	0	0	0	0	0	0	0	15	0	0	0	0	0	0	0	0	0	0	0	0	0	0	0	0
ASV1835	d__Bacteria; p__Bacteroidota; c__Bacteroidia; o__Bacteroidales; f__Prevotellaceae; g__Prevotella; s__uncultured rumen bacterium	0	0	0	0	0	0	0	14	0	0	0	0	0	0	0	0	0	0	0	0	0	0	0	0
ASV1836	d__Bacteria; p__Firmicutes; c__Clostridia; o__Lachnospirales; f__Lachnospiraceae; g__Lachnospiraceae NK3A20 group; s__uncultured bacterium	0	0	0	0	0	0	0	6	0	4	0	0	7	0	0	0	0	0	0	0	0	0	0	0
ASV1837	d__Bacteria; p__Bacteroidota; c__Bacteroidia; o__Bacteroidales; f__Prevotellaceae; g__Prevotellaceae UCG-001; s__uncultured bacterium	0	0	0	0	0	0	0	0	23	0	0	0	0	0	0	0	0	0	0	0	0	0	0	0
ASV1838	d__Bacteria; p__Firmicutes; c__Clostridia; o__Clostridia UCG-014; f__norank; g__norank; s__uncultured bacterium	0	0	0	0	0	0	0	0	0	7	0	0	0	0	21	0	0	0	0	0	0	0	0	0
ASV1839	d__Bacteria; p__Firmicutes; c__Clostridia; o__Oscillospirales; f__Ruminococcaceae; g__UCG-001; s__uncultured bacterium	0	0	0	0	0	0	0	0	0	0	21	0	0	0	0	0	0	0	0	0	0	0	0	0
ASV1840	d__Bacteria; p__Firmicutes; c__Clostridia; o__Christensenellales; f__Christensenellaceae; g__Christensenellaceae R-7 group; s__uncultured bacterium	0	0	0	0	0	0	0	0	0	0	27	0	0	0	0	0	0	0	0	0	0	0	0	0
ASV1841	d__Bacteria; p__Firmicutes; c__Clostridia; o__Lachnospirales; f__Lachnospiraceae; g__Lachnospiraceae FCS020 group	0	0	0	0	0	0	0	0	0	0	0	0	0	0	32	0	0	0	0	0	0	0	0	0
ASV1842	d__Bacteria; p__Bacteroidota; c__Bacteroidia; o__Bacteroidales; f__Prevotellaceae; g__Prevotella; s__uncultured rumen bacterium	0	0	0	0	0	0	0	0	0	0	0	0	0	0	0	25	0	0	0	0	0	0	0	0
ASV1843	d__Bacteria; p__Firmicutes; c__Clostridia; o__Oscillospirales; f__Ruminococcaceae; g__norank; s__uncultured bacterium	0	0	0	0	0	0	0	0	0	0	0	0	0	0	0	0	0	19	0	0	0	0	0	0
ASV1844	d__Bacteria; p__Firmicutes; c__Clostridia; o__Oscillospirales; f__Ruminococcaceae; g__Ruminococcus; s__uncultured rumen bacterium	0	0	0	0	0	0	0	0	0	0	0	0	0	0	0	0	0	0	28	0	0	0	0	0
ASV1845	d__Bacteria; p__Firmicutes; c__Clostridia; o__Christensenellales; f__Christensenellaceae; g__Christensenellaceae R-7 group; s__uncultured bacterium	0	0	0	0	0	0	0	0	0	0	0	0	0	0	0	0	0	0	23	0	0	0	0	0
ASV1846	d__Bacteria; p__Bacteroidota; c__Bacteroidia; o__Bacteroidales; f__F082; g__norank; s__uncultured rumen bacterium	0	0	0	0	0	0	0	0	0	0	0	0	0	0	0	0	0	0	0	0	19	0	0	0
ASV1847	d__Bacteria; p__Bacteroidota; c__Bacteroidia; o__Bacteroidales; f__Prevotellaceae; g__Prevotella; s__uncultured bacterium	0	0	0	0	0	0	0	0	0	0	0	0	0	0	0	0	0	0	0	0	15	0	0	0
ASV1848	d__Bacteria; p__Bacteroidota; c__Bacteroidia; o__Bacteroidales; f__Prevotellaceae; g__Prevotellaceae UCG-001; s__uncultured rumen bacterium	0	0	0	0	0	0	0	0	0	0	0	0	0	0	0	0	0	0	0	0	0	15	0	0
ASV1849	d__Bacteria; p__Bacteroidota; c__Bacteroidia; o__Bacteroidales; f__Prevotellaceae; g__Prevotella; s__uncultured rumen bacterium	0	0	0	0	0	0	0	0	0	0	0	0	0	0	0	0	0	0	0	0	0	0	0	16
ASV1850	d__Bacteria; p__Cyanobacteria; c__Vampirivibrionia; o__Gastranaerophilales; f__norank; g__norank; s__uncultured rumen bacterium	6	0	0	0	0	0	0	0	0	0	5	0	9	0	0	0	0	0	0	0	0	0	0	0
ASV1851	d__Bacteria; p__Bacteroidota; c__Bacteroidia; o__Bacteroidales; f__Prevotellaceae; g__Alloprevotella	7	0	0	0	0	0	0	5	0	1	0	0	0	4	0	0	0	0	0	0	0	2	0	0
ASV1852	d__Bacteria; p__Bacteroidota; c__Bacteroidia; o__Bacteroidales; f__Prevotellaceae; g__Prevotella; s__Prevotella ruminicola	15	0	0	0	0	0	0	0	0	0	0	0	0	0	0	0	0	0	0	0	0	0	0	0
ASV1853	d__Bacteria; p__Bacteroidota; c__Bacteroidia; o__Bacteroidales; f__Prevotellaceae; g__Prevotella; s__uncultured bacterium	10	10	0	0	0	0	0	0	0	0	0	0	0	0	0	0	0	0	0	0	0	0	0	0
ASV1854	d__Bacteria; p__Firmicutes; c__Clostridia; o__Lachnospirales; f__Lachnospiraceae; g__Lachnospiraceae NK3A20 group; s__uncultured bacterium	2	0	0	0	0	0	0	0	0	0	0	6	0	0	0	0	0	8	0	0	0	0	0	4
ASV1855	d__Bacteria; p__Cyanobacteria; c__Vampirivibrionia; o__Gastranaerophilales; f__norank; g__norank; s__uncultured bacterium	17	0	0	0	0	0	0	0	0	0	0	0	0	0	0	0	0	0	0	0	0	0	0	0
ASV1856	d__Bacteria; p__Bacteroidota; c__Bacteroidia; o__Bacteroidales; f__Prevotellaceae; g__Prevotellaceae NK3B31 group; s__uncultured rumen bacterium	0	4	0	0	0	0	0	0	0	0	0	0	5	0	13	0	0	0	0	0	0	0	0	0
ASV1857	d__Bacteria; p__Bacteroidota; c__Bacteroidia; o__Bacteroidales; f__Rikenellaceae; g__Rikenellaceae RC9 gut group; s__uncultured bacterium	0	7	0	0	4	0	0	0	0	0	9	0	0	0	0	0	0	0	0	0	0	0	0	0
ASV1858	d__Bacteria; p__Bacteroidota; c__Bacteroidia; o__Bacteroidales; f__F082; g__norank; s__uncultured rumen bacterium	0	13	0	0	0	0	0	0	0	0	0	0	0	0	0	0	0	0	0	0	0	8	0	0
ASV1859	d__Bacteria; p__Firmicutes; c__Clostridia; o__Lachnospirales; f__Lachnospiraceae; g__Marvinbryantia; s__uncultured bacterium	0	14	0	0	0	0	0	0	0	0	0	0	0	0	0	0	0	0	0	0	0	0	0	0
ASV1860	d__Bacteria; p__Bacteroidota; c__Bacteroidia; o__Bacteroidales; f__F082; g__norank; s__uncultured rumen bacterium	0	0	29	0	0	0	0	0	0	0	0	0	0	0	0	0	0	0	0	0	0	0	0	0
ASV1861	d__Bacteria; p__Bacteroidota; c__Bacteroidia; o__Bacteroidales; f__Rikenellaceae; g__U29-B03; s__uncultured rumen bacterium	0	0	15	0	0	0	0	0	0	0	0	0	0	0	0	0	0	0	0	0	0	0	0	4
ASV1862	d__Bacteria; p__Bacteroidota; c__Bacteroidia; o__Bacteroidales; f__Prevotellaceae; g__Prevotellaceae UCG-001; s__uncultured bacterium	0	0	27	0	0	0	0	0	0	0	0	0	0	0	0	0	0	0	0	0	0	0	0	0
ASV1863	d__Bacteria; p__Bacteroidota; c__Bacteroidia; o__Bacteroidales; f__Prevotellaceae; g__Prevotella; s__uncultured rumen bacterium	0	0	13	0	0	0	0	0	0	0	0	0	0	0	0	0	0	0	0	5	0	0	0	8
ASV1864	d__Bacteria; p__Bacteroidota; c__Bacteroidia; o__Bacteroidales; f__Prevotellaceae; g__Prevotellaceae UCG-001; s__uncultured rumen bacterium	0	0	21	0	0	0	0	0	0	0	0	0	0	0	0	0	0	0	0	0	0	0	0	0
ASV1865	d__Bacteria; p__Firmicutes; c__Clostridia; o__Clostridia UCG-014; f__norank; g__norank; s__uncultured rumen bacterium	0	0	7	0	0	0	0	0	0	0	0	5	0	0	0	0	0	0	0	0	7	0	0	0
ASV1866	d__Bacteria; p__Bacteroidota; c__Bacteroidia; o__Bacteroidales; f__Muribaculaceae; g__norank; s__uncultured rumen bacterium	0	0	0	8	0	0	8	0	0	0	0	0	0	0	0	0	0	0	0	0	0	0	0	0
ASV1867	d__Bacteria; p__Firmicutes; c__Bacilli; o__Erysipelotrichales; f__Erysipelatoclostridiaceae; g__UCG-004; s__uncultured rumen bacterium	0	0	0	13	0	0	0	0	0	0	0	0	0	0	0	4	0	0	0	0	0	0	0	0
ASV1868	d__Bacteria; p__Firmicutes; c__Clostridia; o__Oscillospirales; f__Ruminococcaceae; g__Ruminococcus; s__uncultured bacterium	0	0	0	0	15	0	0	0	0	0	0	0	0	0	0	0	0	0	0	0	0	0	0	0
ASV1869	d__Bacteria; p__Bacteroidota; c__Bacteroidia; o__Bacteroidales; f__Rikenellaceae; g__Rikenellaceae RC9 gut group; s__uncultured rumen bacterium	0	0	0	0	0	18	0	0	0	0	0	0	0	0	0	0	0	0	0	0	0	0	0	0
ASV1870	d__Bacteria; p__Firmicutes; c__Clostridia; o__Lachnospirales; f__Lachnospiraceae; g__Lachnospiraceae UCG-001; s__uncultured bacterium	0	0	0	0	0	21	0	0	0	0	0	0	0	0	0	0	0	0	0	0	0	0	0	0
ASV1871	d__Bacteria; p__Firmicutes; c__Clostridia; o__Lachnospirales; f__Lachnospiraceae; g__Lachnospiraceae NK4A136 group; s__uncultured rumen bacterium	0	0	0	0	0	0	18	0	0	0	0	0	0	0	0	0	0	0	0	0	6	0	0	0
ASV1872	d__Bacteria; p__Bacteroidota; c__Bacteroidia; o__Bacteroidales; f__Prevotellaceae; g__Prevotella; s__uncultured bacterium	0	0	0	0	0	0	10	11	0	0	0	0	0	0	0	0	0	0	0	0	0	0	0	0
ASV1873	d__Bacteria; p__Bacteroidota; c__Bacteroidia; o__Bacteroidales; f__Rikenellaceae; g__Rikenellaceae RC9 gut group; s__uncultured bacterium	0	0	0	0	0	0	0	19	0	0	0	0	0	0	0	0	0	0	0	0	0	0	0	0
ASV1874	d__Bacteria; p__Firmicutes; c__Clostridia; o__Oscillospirales; f__Ruminococcaceae; g__CAG-352; s__uncultured rumen bacterium	0	0	0	0	0	0	0	13	0	0	0	0	0	0	0	0	0	0	0	0	0	0	0	0
ASV1875	d__Bacteria; p__Firmicutes; c__Bacilli; o__Mycoplasmatales; f__Mycoplasmataceae; g__Mycoplasma; s__uncultured rumen bacterium	0	0	0	0	0	0	0	0	0	0	10	13	0	0	0	0	0	0	0	0	0	0	0	0
ASV1876	d__Bacteria; p__Firmicutes; c__Clostridia; o__Christensenellales; f__Christensenellaceae; g__Christensenellaceae R-7 group; s__uncultured bacterium	0	0	0	0	0	0	0	0	0	0	14	0	0	0	0	0	0	0	0	0	0	0	0	6
ASV1877	d__Bacteria; p__Spirochaetota; c__Spirochaetia; o__Spirochaetales; f__Spirochaetaceae; g__Treponema; s__uncultured bacterium	0	0	0	0	0	0	0	0	0	0	13	0	0	0	0	11	0	0	0	0	0	0	0	0
ASV1878	d__Bacteria; p__Firmicutes; c__Clostridia; o__Oscillospirales; f__Oscillospiraceae; g__NK4A214 group	0	0	0	0	0	0	0	0	0	0	8	0	9	0	0	0	0	0	0	0	0	0	0	2
ASV1879	d__Bacteria; p__Firmicutes; c__Clostridia; o__Oscillospirales; f__Ruminococcaceae; g__Ruminococcus; s__uncultured rumen bacterium	0	0	0	0	0	0	0	0	0	0	26	0	0	0	0	0	0	0	0	0	0	0	0	0
ASV1880	d__Bacteria; p__Elusimicrobiota; c__Endomicrobia; o__Endomicrobiales; f__Endomicrobiaceae; g__Endomicrobium; s__uncultured rumen bacterium	0	0	0	0	0	0	0	0	0	0	0	0	7	0	0	0	0	0	0	0	0	0	0	10
ASV1881	d__Bacteria; p__Bacteroidota; c__Bacteroidia; o__Bacteroidales; f__Prevotellaceae; g__Alloprevotella	0	0	0	0	0	0	0	0	0	0	0	0	7	0	4	0	0	0	0	0	0	7	0	0
ASV1882	d__Bacteria; p__Bacteroidota; c__Bacteroidia; o__Bacteroidales; f__Rikenellaceae; g__Rikenellaceae RC9 gut group; s__uncultured rumen bacterium	0	0	0	0	0	0	0	0	0	0	0	0	6	0	12	0	0	0	0	0	0	0	10	0
ASV1883	d__Bacteria; p__Firmicutes; c__Clostridia; o__Oscillospirales; f__Ruminococcaceae; g__Ruminococcus; s__uncultured bacterium	0	0	0	0	0	0	0	0	0	0	0	0	0	0	31	0	0	0	0	0	0	0	0	0
ASV1884	d__Bacteria; p__Firmicutes; c__Clostridia; o__Oscillospirales; f__Ruminococcaceae; g__Ruminococcus; s__uncultured rumen bacterium	0	0	0	0	0	0	0	0	0	0	0	0	0	0	31	0	0	0	0	0	0	0	0	0
ASV1885	d__Bacteria; p__Firmicutes; c__Clostridia; o__Peptostreptococcales-Tissierellales; f__Anaerovoracaceae; g__Anaerovorax; s__uncultured bacterium	0	0	0	0	0	0	0	0	0	0	0	0	0	0	0	17	0	0	0	0	0	0	0	0
ASV1886	d__Bacteria; p__Bacteroidota; c__Bacteroidia; o__Bacteroidales; f__Muribaculaceae; g__norank; s__uncultured rumen bacterium	0	0	0	0	0	0	0	0	0	0	0	0	0	0	0	25	0	0	0	0	0	0	0	0
ASV1887	d__Bacteria; p__Patescibacteria; c__Saccharimonadia; o__Saccharimonadales; f__Saccharimonadaceae; g__Candidatus Saccharimonas; s__uncultured rumen bacterium	0	0	0	0	0	0	0	0	0	0	0	0	0	0	0	0	0	18	0	0	0	0	0	0
ASV1888	d__Bacteria; p__Bacteroidota; c__Bacteroidia; o__Bacteroidales; f__Prevotellaceae; g__Prevotella; s__uncultured bacterium	0	0	0	0	0	0	0	0	0	0	0	0	0	0	0	0	0	0	0	0	0	0	27	0
ASV1889	d__Bacteria; p__Bacteroidota; c__Bacteroidia; o__Bacteroidales; f__Prevotellaceae; g__Prevotellaceae UCG-001; s__uncultured bacterium	0	0	0	0	0	0	0	0	0	0	0	0	0	0	0	0	0	0	0	0	0	0	27	0
ASV1890	d__Bacteria; p__Firmicutes; c__Bacilli; o__Mycoplasmatales; f__Mycoplasmataceae; g__Mycoplasma; s__uncultured rumen bacterium	0	0	0	0	0	0	0	0	0	0	0	0	0	0	0	0	0	0	0	0	0	0	0	14
ASV1891	d__Bacteria; p__Firmicutes; c__Clostridia; o__Christensenellales; f__Christensenellaceae; g__Christensenellaceae R-7 group; s__uncultured bacterium	0	0	0	0	0	0	0	0	0	0	0	0	0	0	0	0	0	0	0	0	0	0	0	19
ASV1892	d__Bacteria; p__Firmicutes; c__Clostridia; o__Oscillospirales; f__UCG-010; g__norank; s__uncultured rumen bacterium	3	0	0	0	0	0	0	0	0	0	0	0	3	0	0	0	0	1	11	0	0	0	0	0
ASV1893	d__Bacteria; p__Spirochaetota; c__Spirochaetia; o__Spirochaetales; f__Spirochaetaceae; g__Treponema; s__uncultured bacterium	23	0	0	0	0	0	0	0	0	0	0	0	0	0	0	0	0	0	0	0	0	0	0	0
ASV1894	d__Bacteria; p__Firmicutes; c__Clostridia; o__Peptostreptococcales-Tissierellales; f__Anaerovoracaceae; g__Anaerovorax; s__uncultured rumen bacterium	4	0	0	0	0	0	0	8	0	0	0	0	0	0	0	0	0	0	0	0	0	0	0	0
ASV1895	d__Bacteria; p__Bacteroidota; c__Bacteroidia; o__Cytophagales; f__Amoebophilaceae; g__Candidatus Amoebophilus; s__uncultured bacterium	0	8	0	0	0	0	0	0	0	0	0	4	0	0	0	4	0	3	0	0	0	0	0	0
ASV1896	d__Bacteria; p__Firmicutes; c__Clostridia; o__Lachnospirales; f__Lachnospiraceae; g__Lachnospiraceae UCG-006; s__uncultured bacterium	0	8	0	0	0	0	0	0	0	0	0	0	0	0	0	0	0	0	0	0	0	13	0	0
ASV1897	d__Bacteria; p__Firmicutes; c__Clostridia; o__Lachnospirales; f__Lachnospiraceae; g__[Eubacterium] ruminantium group; s__uncultured bacterium	0	4	0	0	11	0	0	0	0	0	0	0	0	0	0	0	0	0	0	0	0	0	0	0
ASV1898	d__Bacteria; p__Spirochaetota; c__Spirochaetia; o__Spirochaetales; f__Spirochaetaceae; g__Treponema; s__uncultured rumen bacterium	0	0	7	0	0	0	0	0	0	0	0	11	0	0	0	0	0	0	0	0	0	0	0	0
ASV1899	d__Bacteria; p__Bacteroidota; c__Bacteroidia; o__Bacteroidales; f__Prevotellaceae; g__Prevotella; s__uncultured rumen bacterium	0	0	20	0	0	0	0	0	0	0	0	0	0	0	0	0	0	0	0	0	0	0	0	0
ASV1900	d__Bacteria; p__Bacteroidota; c__Bacteroidia; o__Bacteroidales; f__Prevotellaceae; g__Prevotellaceae UCG-001; s__uncultured rumen bacterium	0	0	22	0	0	0	0	0	0	0	0	0	0	0	0	0	0	0	0	0	0	0	0	0
ASV1901	d__Bacteria; p__Bacteroidota; c__Bacteroidia; o__Bacteroidales; f__Muribaculaceae; g__norank; s__uncultured bacterium	0	0	0	16	0	0	0	0	0	0	0	0	0	0	0	0	0	0	0	0	0	0	0	0
ASV1902	d__Bacteria; p__Firmicutes; c__Clostridia; o__Lachnospirales; f__Lachnospiraceae; g__uncultured	0	0	0	16	0	0	0	0	0	0	0	0	0	0	0	0	0	0	0	0	0	0	0	0
ASV1903	d__Bacteria; p__Cyanobacteria; c__Vampirivibrionia; o__Gastranaerophilales; f__norank; g__norank; s__uncultured bacterium	0	0	0	15	0	0	0	0	0	0	0	0	0	0	0	0	0	0	0	0	0	0	0	0
ASV1904	d__Bacteria; p__Firmicutes; c__Clostridia; o__Lachnospirales; f__Lachnospiraceae; g__[Eubacterium] ventriosum group; s__uncultured bacterium	0	0	0	0	12	0	0	0	0	0	0	0	0	0	0	0	0	0	0	0	0	2	0	0
ASV1905	d__Bacteria; p__Firmicutes; c__Negativicutes; o__Veillonellales-Selenomonadales; f__Veillonellaceae; g__Dialister; s__uncultured bacterium	0	0	0	0	16	0	0	0	0	0	0	0	0	0	0	0	0	0	0	0	0	0	0	0
ASV1906	d__Bacteria; p__Firmicutes; c__Clostridia; o__Oscillospirales; f__Hungateiclostridiaceae; g__Saccharofermentans; s__uncultured rumen bacterium	0	0	0	0	9	0	0	0	0	0	0	0	0	0	0	0	0	0	0	0	0	0	0	0
ASV1907	d__Bacteria; p__Firmicutes; c__Clostridia; o__Clostridia UCG-014; f__norank; g__norank; s__uncultured Ruminococcaceae bacterium	0	0	0	0	16	0	0	0	0	0	0	0	0	0	0	0	0	0	0	0	0	0	0	0
ASV1908	d__Bacteria; p__Bacteroidota; c__Bacteroidia; o__Bacteroidales; f__Rikenellaceae; g__Rikenellaceae RC9 gut group; s__uncultured rumen bacterium	0	0	0	0	0	0	10	0	2	0	0	0	0	0	0	0	0	5	0	0	0	4	0	0
ASV1909	d__Bacteria; p__Bacteroidota; c__Bacteroidia; o__Bacteroidales; f__Prevotellaceae; g__Prevotella; s__uncultured rumen bacterium	0	0	0	0	0	0	0	15	0	0	0	0	0	0	0	0	0	0	0	0	0	0	0	0
ASV1910	d__Bacteria; p__Bacteroidota; c__Bacteroidia; o__Bacteroidales; f__Prevotellaceae; g__Prevotella; s__uncultured rumen bacterium	0	0	0	0	0	0	0	0	23	0	0	0	0	0	0	0	0	0	0	0	0	0	0	0
ASV1911	d__Bacteria; p__Firmicutes; c__Clostridia; o__Christensenellales; f__Christensenellaceae; g__Christensenellaceae R-7 group; s__uncultured rumen bacterium	0	0	0	0	0	0	0	0	0	0	0	21	0	0	0	0	0	0	0	0	0	0	0	0
ASV1912	d__Bacteria; p__Firmicutes; c__Clostridia; o__Clostridia UCG-014; f__norank; g__norank; s__uncultured bacterium	0	0	0	0	0	0	0	0	0	0	0	19	0	0	0	0	0	0	0	0	0	0	0	0
ASV1913	d__Bacteria; p__Fibrobacterota; c__Fibrobacteria; o__Fibrobacterales; f__Fibrobacteraceae; g__Fibrobacter; s__uncultured rumen bacterium	0	0	0	0	0	0	0	0	0	0	0	0	19	0	0	0	0	0	0	0	0	0	0	0
ASV1914	d__Bacteria; p__Bacteroidota; c__Bacteroidia; o__Bacteroidales; f__Prevotellaceae; g__Prevotella; s__uncultured rumen bacterium	0	0	0	0	0	0	0	0	0	0	0	0	4	0	0	0	0	3	0	0	0	0	0	5
ASV1915	d__Bacteria; p__Firmicutes; c__Clostridia; o__Lachnospirales; f__Lachnospiraceae; g__Moryella; s__uncultured rumen bacterium	0	0	0	0	0	0	0	0	0	0	0	0	13	0	0	0	0	0	0	0	0	0	0	0
ASV1916	d__Bacteria; p__Bacteroidota; c__Bacteroidia; o__Bacteroidales; f__Prevotellaceae; g__Prevotella; s__uncultured rumen bacterium	0	0	0	0	0	0	0	0	0	0	0	0	24	0	0	0	0	0	0	0	0	0	0	0
ASV1917	d__Bacteria; p__Firmicutes; c__Clostridia; o__Lachnospirales; f__Lachnospiraceae; g__Lachnospiraceae NK3A20 group; s__uncultured rumen bacterium	0	0	0	0	0	0	0	0	0	0	0	0	0	6	0	0	0	12	0	0	4	0	0	0
ASV1918	d__Bacteria; p__Bacteroidota; c__Bacteroidia; o__Bacteroidales; f__Muribaculaceae; g__norank; s__uncultured rumen bacterium	0	0	0	0	0	0	0	0	0	0	0	0	0	0	30	0	0	0	0	0	0	0	0	0
ASV1919	d__Bacteria; p__Firmicutes; c__Clostridia; o__Oscillospirales; f__Ruminococcaceae; g__Ruminococcus; s__uncultured bacterium	0	0	0	0	0	0	0	0	0	0	0	0	0	0	30	0	0	0	0	0	0	0	0	0
ASV1920	d__Bacteria; p__Firmicutes; c__Clostridia; o__Oscillospirales; f__Ruminococcaceae; g__Ruminococcus; s__uncultured rumen bacterium	0	0	0	0	0	0	0	0	0	0	0	0	0	0	0	19	0	0	0	0	0	0	0	0
ASV1921	d__Bacteria; p__Bacteroidota; c__Bacteroidia; o__Bacteroidales; f__Rikenellaceae; g__Rikenellaceae RC9 gut group; s__uncultured bacterium	0	0	0	0	0	0	0	0	0	0	0	0	0	0	0	0	0	0	23	0	0	0	0	0
ASV1922	d__Bacteria; p__Firmicutes; c__Clostridia; o__Clostridia UCG-014; f__norank; g__norank; s__uncultured rumen bacterium	0	0	0	0	0	0	0	0	0	0	0	0	0	0	0	0	0	0	0	26	0	0	0	0
ASV1923	d__Bacteria; p__Firmicutes; c__Clostridia; o__Christensenellales; f__Christensenellaceae; g__Christensenellaceae R-7 group; s__uncultured bacterium	0	0	0	0	0	0	0	0	0	0	0	0	0	0	0	0	0	0	0	0	11	0	0	0
ASV1924	d__Bacteria; p__Firmicutes; c__Clostridia; o__Lachnospirales; f__Lachnospiraceae; g__Lachnospiraceae NK4A136 group; s__uncultured rumen bacterium	0	0	0	0	0	0	0	0	0	0	0	0	0	0	0	0	0	0	0	0	13	0	0	0
ASV1925	d__Bacteria; p__Bacteroidota; c__Bacteroidia; o__Bacteroidales; f__Rikenellaceae; g__Rikenellaceae RC9 gut group; s__uncultured rumen bacterium	0	0	0	0	0	0	0	0	0	0	0	0	0	0	0	0	0	0	0	0	14	0	0	0
ASV1926	d__Bacteria; p__Firmicutes; c__Clostridia; o__Oscillospirales; f__[Eubacterium] coprostanoligenes group; g__norank; s__uncultured bacterium	0	0	0	0	0	0	0	0	0	0	0	0	0	0	0	0	0	0	0	0	0	18	0	0
ASV1927	d__Bacteria; p__Firmicutes; c__Clostridia; o__Oscillospirales; f__Ruminococcaceae; g__Ruminococcus; s__uncultured rumen bacterium	0	0	0	0	0	0	0	0	0	0	0	0	0	0	0	0	0	0	0	0	0	0	27	0
ASV1928	d__Bacteria; p__Firmicutes; c__Clostridia; o__Oscillospirales; f__Ruminococcaceae; g__uncultured; s__uncultured bacterium	0	0	0	0	0	0	0	0	0	0	0	0	0	0	0	0	0	0	0	0	0	0	0	15
ASV1929	d__Bacteria; p__Bacteroidota; c__Bacteroidia; o__Bacteroidales; f__Prevotellaceae; g__Prevotella; s__uncultured bacterium	0	0	0	0	0	0	0	0	0	0	0	0	0	0	0	0	0	0	0	0	0	0	0	19
ASV1930	d__Bacteria; p__Firmicutes; c__Clostridia; o__Lachnospirales; f__Lachnospiraceae; g__Lachnospiraceae UCG-006; s__uncultured bacterium	0	0	0	0	0	0	0	0	0	0	0	0	0	0	0	0	0	0	0	0	0	0	0	15
ASV1931	d__Bacteria; p__Proteobacteria; c__Alphaproteobacteria; o__Rickettsiales; f__uncultured; g__norank; s__uncultured rumen bacterium	2	15	0	0	0	0	0	0	0	0	0	0	0	0	0	0	0	0	0	0	0	0	0	0
ASV1932	d__Bacteria; p__Cyanobacteria; c__Vampirivibrionia; o__Gastranaerophilales; f__norank; g__norank; s__uncultured rumen bacterium	18	0	0	0	0	0	0	0	0	0	0	0	0	0	0	0	0	0	0	0	0	0	0	0
ASV1933	d__Bacteria; p__Firmicutes; c__Clostridia; o__Oscillospirales; f__[Eubacterium] coprostanoligenes group; g__norank; s__uncultured rumen bacterium	8	0	0	0	0	0	0	0	0	0	0	0	9	0	0	0	0	0	0	0	0	0	0	0
ASV1934	d__Bacteria; p__Patescibacteria; c__Saccharimonadia; o__Saccharimonadales; f__Saccharimonadaceae; g__Candidatus Saccharimonas; s__uncultured rumen bacterium	20	0	0	0	0	0	0	0	0	0	0	0	0	0	0	0	0	0	0	0	0	0	0	0
ASV1935	d__Bacteria; p__Firmicutes; c__Clostridia; o__Clostridia UCG-014; f__norank; g__norank; s__uncultured bacterium	6	0	0	0	0	0	0	0	0	0	0	0	0	0	0	0	0	0	14	0	0	0	0	0
ASV1936	d__Bacteria; p__Proteobacteria; c__Alphaproteobacteria; o__Rickettsiales; f__Mitochondria; g__norank; s__uncultured rumen bacterium	0	7	0	0	0	0	0	0	0	0	0	3	9	0	0	0	0	0	0	0	0	0	0	0
ASV1937	d__Bacteria; p__Firmicutes; c__Clostridia; o__Peptostreptococcales-Tissierellales; f__Anaerovoracaceae; g__Anaerovorax; s__uncultured bacterium	0	13	0	0	0	0	0	0	0	0	0	0	0	0	0	0	0	0	10	0	0	0	0	0
ASV1938	d__Bacteria; p__Bacteroidota; c__Bacteroidia; o__Bacteroidales; f__Prevotellaceae; g__Prevotellaceae UCG-003; s__uncultured rumen bacterium	0	4	13	0	0	0	0	0	0	0	0	0	0	0	0	3	0	1	0	0	0	0	0	0
ASV1939	d__Bacteria; p__Bacteroidota; c__Bacteroidia; o__Bacteroidales; f__Prevotellaceae; g__Prevotella; s__uncultured rumen bacterium	0	4	0	0	0	0	0	0	0	0	0	0	0	0	0	0	0	0	0	0	14	0	0	0
ASV1940	d__Bacteria; p__Firmicutes; c__Clostridia; o__Oscillospirales; f__Ruminococcaceae; g__Ruminococcus	0	0	20	0	0	0	0	0	0	0	0	0	0	0	0	0	0	0	0	0	0	0	0	0
ASV1941	d__Bacteria; p__Bacteroidota; c__Bacteroidia; o__Bacteroidales; f__Rikenellaceae; g__Rikenellaceae RC9 gut group; s__uncultured bacterium	0	0	24	0	0	0	0	0	0	0	0	0	0	0	0	0	0	0	0	0	0	0	0	0
ASV1942	d__Bacteria; p__Bacteroidota; c__Bacteroidia; o__Bacteroidales; f__Rikenellaceae; g__Rikenellaceae RC9 gut group; s__uncultured bacterium	0	0	21	0	0	0	0	0	0	0	0	0	0	0	0	0	0	0	0	0	0	0	0	0
ASV1943	d__Bacteria; p__Bacteroidota; c__Bacteroidia; o__Bacteroidales; f__Prevotellaceae; g__Prevotella	0	0	21	0	0	0	0	0	0	0	0	0	0	0	0	0	0	0	0	0	0	0	0	0
ASV1944	d__Bacteria; p__Bacteroidota; c__Bacteroidia; o__Bacteroidales; f__Prevotellaceae; g__Prevotella; s__uncultured bacterium	0	0	7	0	0	0	18	0	0	0	0	0	0	0	0	0	0	0	0	0	0	0	0	0
ASV1945	d__Bacteria; p__Bacteroidota; c__Bacteroidia; o__Bacteroidales; f__Prevotellaceae; g__Prevotella; s__uncultured rumen bacterium	0	0	24	0	0	0	0	0	0	0	0	0	0	0	0	0	0	0	0	0	0	0	0	0
ASV1946	d__Bacteria; p__Bacteroidota; c__Bacteroidia; o__Bacteroidales; f__F082; g__norank; s__uncultured rumen bacterium	0	0	0	4	0	0	0	0	0	0	0	0	0	0	0	0	0	0	0	0	0	0	15	1
ASV1947	d__Bacteria; p__Firmicutes; c__Clostridia; o__Christensenellales; f__Christensenellaceae; g__Christensenellaceae R-7 group	0	0	0	3	0	0	0	0	0	0	0	0	8	0	0	0	0	0	0	0	0	0	0	9
ASV1948	d__Bacteria; p__Bacteroidota; c__Bacteroidia; o__Bacteroidales; f__Prevotellaceae; g__Prevotella; s__uncultured bacterium	0	0	0	0	11	0	0	0	0	0	0	0	0	0	0	0	0	0	0	0	0	0	0	0
ASV1949	d__Bacteria; p__Bacteroidota; c__Bacteroidia; o__Bacteroidales; f__Prevotellaceae; g__Prevotellaceae UCG-001; s__uncultured bacterium	0	0	0	0	0	0	0	14	0	0	0	0	0	0	0	0	0	0	0	0	0	0	0	0
ASV1950	d__Bacteria; p__Firmicutes; c__Clostridia; o__Lachnospirales; f__Lachnospiraceae; g__Lachnospiraceae FCS020 group; s__uncultured rumen bacterium	0	0	0	0	0	0	0	15	0	0	0	0	0	0	0	0	0	0	0	0	0	0	0	0
ASV1951	d__Bacteria; p__Firmicutes; c__Clostridia; o__Peptostreptococcales-Tissierellales; f__Anaerovoracaceae; g__Anaerovorax; s__uncultured rumen bacterium	0	0	0	0	0	0	0	0	21	0	0	0	0	0	0	0	0	0	0	0	0	0	0	0
ASV1952	d__Bacteria; p__Firmicutes; c__Clostridia; o__Oscillospirales; f__Ruminococcaceae; g__CAG-352; s__uncultured rumen bacterium	0	0	0	0	0	0	0	0	0	0	10	14	0	0	0	0	0	0	0	0	0	0	0	0
ASV1953	d__Bacteria; p__Firmicutes; c__Clostridia; o__Oscillospirales; f__[Clostridium] methylpentosum group; g__norank; s__uncultured bacterium	0	0	0	0	0	0	0	0	0	0	20	0	0	0	0	0	0	0	0	0	0	0	0	0
ASV1954	d__Bacteria; p__Patescibacteria; c__Saccharimonadia; o__Saccharimonadales; f__Saccharimonadaceae; g__Candidatus Saccharimonas; s__uncultured rumen bacterium	0	0	0	0	0	0	0	0	0	0	24	0	0	0	0	0	0	0	0	0	0	0	0	0
ASV1955	d__Bacteria; p__Firmicutes; c__Clostridia; o__Oscillospirales; f__Oscillospiraceae; g__NK4A214 group; s__uncultured bacterium	0	0	0	0	0	0	0	0	0	0	11	0	8	0	0	0	0	0	0	0	0	0	0	0
ASV1956	d__Bacteria; p__Bacteroidota; c__Bacteroidia; o__Bacteroidales; f__Prevotellaceae; g__Prevotella; s__uncultured rumen bacterium	0	0	0	0	0	0	0	0	0	0	0	15	0	0	0	0	0	0	0	0	0	0	0	0
ASV1957	d__Bacteria; p__Bacteroidota; c__Bacteroidia; o__Bacteroidales; f__Prevotellaceae; g__Prevotella; s__uncultured bacterium	0	0	0	0	0	0	0	0	0	0	0	16	0	0	0	0	0	0	0	0	0	0	0	0
ASV1958	d__Bacteria; p__Firmicutes; c__Clostridia; o__Oscillospirales; f__Ruminococcaceae; g__Ruminococcus; s__uncultured bacterium	0	0	0	0	0	0	0	0	0	0	0	0	20	0	0	0	0	0	0	0	0	0	0	0
ASV1959	d__Bacteria; p__Patescibacteria; c__Saccharimonadia; o__Saccharimonadales; f__Saccharimonadaceae; g__Candidatus Saccharimonas	0	0	0	0	0	0	0	0	0	0	0	0	16	0	0	0	0	0	0	0	3	0	0	0
ASV1960	d__Bacteria; p__Bacteroidota; c__Bacteroidia; o__Bacteroidales; f__Rikenellaceae; g__Rikenellaceae RC9 gut group; s__uncultured rumen bacterium	0	0	0	0	0	0	0	0	0	0	0	0	9	0	0	0	0	2	0	0	0	0	0	5
ASV1961	d__Bacteria; p__Firmicutes; c__Clostridia; o__Lachnospirales; f__Lachnospiraceae; g__[Ruminococcus] gauvreauii group; s__uncultured bacterium	0	0	0	0	0	0	0	0	0	0	0	0	21	0	0	0	0	0	0	0	0	0	0	0
ASV1962	d__Bacteria; p__Bacteroidota; c__Bacteroidia; o__Bacteroidales; f__Prevotellaceae; g__Prevotella; s__uncultured rumen bacterium	0	0	0	0	0	0	0	0	0	0	0	0	0	0	0	22	0	0	0	0	0	0	0	0
ASV1963	d__Bacteria; p__Bacteroidota; c__Bacteroidia; o__Bacteroidales; f__Prevotellaceae; g__Prevotellaceae YAB2003 group; s__uncultured rumen bacterium	0	0	0	0	0	0	0	0	0	0	0	0	0	0	0	18	0	0	0	0	0	0	0	0
ASV1964	d__Bacteria; p__Firmicutes; c__Bacilli; o__Acholeplasmatales; f__Acholeplasmataceae; g__Anaeroplasma	0	0	0	0	0	0	0	0	0	0	0	0	0	0	0	0	0	0	21	0	0	0	0	0
ASV1965	d__Bacteria; p__Firmicutes; c__Clostridia; o__Lachnospirales; f__Lachnospiraceae; g__Lachnospiraceae UCG-008; s__uncultured bacterium	0	0	0	0	0	0	0	0	0	0	0	0	0	0	0	0	0	0	24	0	0	0	0	0
ASV1966	d__Bacteria; p__Bacteroidota; c__Bacteroidia; o__Bacteroidales; f__Prevotellaceae; g__Prevotellaceae Ga6A1 group	0	0	0	0	0	0	0	0	0	0	0	0	0	0	0	0	0	0	0	0	13	0	0	0
ASV1967	d__Bacteria; p__Proteobacteria; c__Alphaproteobacteria; o__Rhodospirillales; f__uncultured; g__norank; s__uncultured bacterium	0	0	0	0	0	0	0	0	0	0	0	0	0	0	0	0	0	0	0	0	18	0	0	0
ASV1968	d__Bacteria; p__Bacteroidota; c__Bacteroidia; o__Bacteroidales; f__Prevotellaceae; g__Prevotellaceae UCG-001	0	0	0	0	0	0	0	0	0	0	0	0	0	0	0	0	0	0	0	0	13	0	0	0
ASV1969	d__Bacteria; p__Bacteroidota; c__Bacteroidia; o__Bacteroidales; f__F082; g__norank; s__uncultured bacterium	0	0	0	0	0	0	0	0	0	0	0	0	0	0	0	0	0	0	0	0	19	0	0	0
ASV1970	d__Bacteria; p__Firmicutes; c__Clostridia; o__Christensenellales; f__Christensenellaceae; g__Christensenellaceae R-7 group; s__uncultured bacterium	0	0	0	0	0	0	0	0	0	0	0	0	0	0	0	0	0	0	0	0	0	0	27	0
ASV1971	d__Bacteria; p__Proteobacteria; c__Alphaproteobacteria; o__Rhodospirillales; f__uncultured; g__norank	5	0	14	0	0	0	0	0	0	0	0	0	0	0	0	0	0	0	0	0	0	0	0	0
ASV1972	d__Bacteria; p__Firmicutes; c__Bacilli; o__RF39; f__norank; g__norank; s__uncultured rumen bacterium	18	0	0	0	0	0	0	0	0	0	0	0	0	0	0	0	0	0	0	0	0	0	0	0
ASV1973	d__Bacteria; p__Proteobacteria; c__Alphaproteobacteria; o__Paracaedibacterales; f__Paracaedibacteraceae; g__uncultured; s__uncultured rumen bacterium	0	10	0	0	0	0	0	0	0	0	0	0	0	0	0	0	0	0	0	0	0	0	0	0
ASV1974	d__Bacteria; p__Firmicutes; c__Clostridia; o__Oscillospirales; f__Ruminococcaceae; g__Ruminococcus; s__uncultured bacterium	0	10	0	0	0	0	0	0	0	0	0	0	0	0	0	0	0	0	4	0	0	0	6	0
ASV1975	d__Bacteria; p__Firmicutes; c__Clostridia; o__Lachnospirales; f__Lachnospiraceae; g__Lachnoclostridium; s__uncultured bacterium	0	11	0	0	0	0	0	0	0	0	0	8	0	0	0	0	0	0	0	0	0	0	0	0
ASV1976	d__Bacteria; p__Proteobacteria; c__Alphaproteobacteria; o__Rickettsiales; f__Mitochondria; g__norank; s__uncultured rumen bacterium	0	3	12	0	0	0	0	0	0	0	0	0	0	0	0	0	0	0	0	0	0	0	0	4
ASV1977	d__Bacteria; p__Desulfobacterota; c__Desulfuromonadia; o__Bradymonadales; f__norank; g__norank; s__uncultured bacterium	0	0	20	0	0	0	0	0	0	0	0	0	0	0	0	0	0	0	0	0	0	0	0	0
ASV1978	d__Bacteria; p__Bacteroidota; c__Bacteroidia; o__Bacteroidales; f__Prevotellaceae; g__Prevotellaceae YAB2003 group; s__uncultured rumen bacterium	0	0	22	0	0	0	0	0	0	0	0	0	0	0	0	0	0	0	0	0	0	0	0	0
ASV1979	d__Bacteria; p__Firmicutes; c__Bacilli; o__Lactobacillales; f__Lactobacillaceae; g__Lactobacillus	0	0	0	2	0	0	6	3	7	0	0	0	0	0	0	0	0	0	0	0	0	0	0	0
ASV1980	d__Bacteria; p__Fibrobacterota; c__Fibrobacteria; o__Fibrobacterales; f__Fibrobacteraceae; g__Fibrobacter; s__uncultured bacterium	0	0	0	2	0	0	0	0	0	16	0	0	0	0	0	0	0	0	0	0	0	0	0	0
ASV1981	d__Bacteria; p__Firmicutes; c__Negativicutes; o__Veillonellales-Selenomonadales; f__Selenomonadaceae; g__Selenomonas; s__uncultured rumen bacterium	0	0	0	10	0	0	0	0	0	0	0	0	0	0	0	0	0	10	0	0	0	0	0	0
ASV1982	d__Bacteria; p__Bacteroidota; c__Bacteroidia; o__Bacteroidales; f__Rikenellaceae; g__Rikenellaceae RC9 gut group; s__uncultured bacterium	0	0	0	2	0	0	0	0	0	0	0	0	7	0	0	0	0	0	10	0	0	1	0	0
ASV1983	d__Bacteria; p__Bacteroidota; c__Bacteroidia; o__Bacteroidales; f__Prevotellaceae; g__Prevotella; s__uncultured rumen bacterium	0	0	0	4	7	0	0	0	0	0	0	0	0	0	0	0	0	8	0	0	0	0	0	0
ASV1984	d__Bacteria; p__Bacteroidota; c__Bacteroidia; o__Bacteroidales; f__F082; g__norank; s__uncultured rumen bacterium	0	0	0	9	0	0	0	0	0	0	0	0	0	0	0	0	0	0	0	0	0	0	0	0
ASV1985	d__Bacteria; p__Bacteroidota; c__Bacteroidia; o__Bacteroidales; f__Prevotellaceae; g__Prevotella; s__uncultured bacterium	0	0	0	0	15	0	0	0	0	0	0	0	0	0	0	0	0	0	0	0	0	0	0	0
ASV1986	d__Bacteria; p__Bacteroidota; c__Bacteroidia; o__Bacteroidales; f__Rikenellaceae; g__Rikenellaceae RC9 gut group; s__uncultured rumen bacterium	0	0	0	0	3	0	0	0	0	0	0	0	12	0	0	3	0	0	0	0	0	0	0	0
ASV1987	d__Bacteria; p__Proteobacteria; c__Alphaproteobacteria; o__Rhodospirillales; f__uncultured; g__norank; s__uncultured bacterium	0	0	0	0	12	0	0	0	0	0	0	0	0	0	0	0	0	0	0	0	0	0	0	0
ASV1988	d__Bacteria; p__Firmicutes; c__Bacilli; o__Acholeplasmatales; f__Acholeplasmataceae; g__Anaeroplasma; s__uncultured rumen bacterium	0	0	0	0	7	0	0	0	0	0	0	0	0	0	0	10	0	0	0	0	0	0	0	0
ASV1989	d__Bacteria; p__Firmicutes; c__Bacilli; o__RF39; f__norank; g__norank; s__uncultured rumen bacterium	0	0	0	0	0	0	0	16	0	0	0	0	0	0	0	0	0	0	0	0	0	0	0	0
ASV1990	d__Bacteria; p__Bacteroidota; c__Bacteroidia; o__Bacteroidales; f__Prevotellaceae; g__Prevotella; s__uncultured rumen bacterium	0	0	0	0	0	0	0	0	19	0	0	0	0	0	0	0	0	0	0	0	0	0	0	0
ASV1991	d__Bacteria; p__Bacteroidota; c__Bacteroidia; o__Bacteroidales; f__Prevotellaceae; g__Prevotellaceae NK3B31 group; s__uncultured rumen bacterium	0	0	0	0	0	0	0	0	0	0	20	0	0	0	0	0	0	0	0	0	0	0	0	0
ASV1992	d__Bacteria; p__Firmicutes; c__Clostridia; o__Oscillospirales; f__UCG-010; g__norank; s__uncultured bacterium	0	0	0	0	0	0	0	0	0	0	0	7	0	0	0	0	0	0	4	0	0	0	11	0
ASV1993	d__Bacteria; p__Firmicutes; c__Clostridia; o__Oscillospirales; f__Ruminococcaceae; g__Ruminococcus; s__uncultured bacterium	0	0	0	0	0	0	0	0	0	0	0	16	0	0	0	0	0	0	0	0	0	0	0	0
ASV1994	d__Bacteria; p__Bacteroidota; c__Bacteroidia; o__Bacteroidales; f__Prevotellaceae; g__Prevotellaceae NK3B31 group	0	0	0	0	0	0	0	0	0	0	0	0	20	0	0	0	0	0	0	0	0	0	0	0
ASV1995	d__Bacteria; p__Spirochaetota; c__Spirochaetia; o__Spirochaetales; f__Spirochaetaceae; g__Treponema; s__uncultured rumen bacterium	0	0	0	0	0	0	0	0	0	0	0	0	15	0	0	0	0	0	0	0	0	0	0	0
ASV1996	d__Bacteria; p__Bacteroidota; c__Bacteroidia; o__Bacteroidales; f__Rikenellaceae; g__Rikenellaceae RC9 gut group; s__uncultured bacterium	0	0	0	0	0	0	0	0	0	0	0	0	19	0	0	0	0	0	0	0	0	0	0	0
ASV1997	d__Bacteria; p__Bacteroidota; c__Bacteroidia; o__Bacteroidales; f__Prevotellaceae; g__Prevotellaceae UCG-003; s__uncultured rumen bacterium	0	0	0	0	0	0	0	0	0	0	0	0	17	0	0	0	0	0	0	0	0	0	0	0
ASV1998	d__Bacteria; p__Bacteroidota; c__Bacteroidia; o__Bacteroidales; f__Prevotellaceae; g__Prevotellaceae UCG-001; s__uncultured rumen bacterium	0	0	0	0	0	0	0	0	0	0	0	0	3	0	0	0	0	0	0	0	0	14	0	0
ASV1999	d__Bacteria; p__Firmicutes; c__Clostridia; o__Oscillospirales; f__Ruminococcaceae; g__Ruminococcus; s__uncultured bacterium	0	0	0	0	0	0	0	0	0	0	0	0	0	0	28	0	0	0	0	0	0	0	0	0
[truncated: 2,466 more rows]

## Sheet: Phylum_alys
Phylum	Jersey			Holstein			P
	Average relative abundance	Standard deviation	Standard error of the mean	Average relative abundance	Standard deviation	Standard error of the mean
Bacteroidota	61.623	8.0048	2.3108	53.465	10.4812	3.0257	0.0433
Cyanobacteria	0.2655	0.1799	0.0519	0.7007	0.3116	0.09	0.0015
Firmicutes	33.8249	7.9857	2.3053	26.5345	8.0898	2.3353	0.0496
Patescibacteria	0.9056	0.4639	0.1339	0.6539	0.4538	0.131	0.2481
Proteobacteria	1.132	0.7211	0.2082	16.5358	14.6736	4.2359	0.0022
Spirochaetota	1.0775	0.4294	0.124	1.2452	0.959	0.2768	0.8625

## Sheet: Genus_alys
Genus	Jersey			Holstein			P	Adjust-P
	Average relative abundance	Standard deviation	Standard error of the mean	Average relative abundance	Standard deviation	Standard error of the mean
Selenomonadaceae_uncultured	0	0	0	1.58516	0.896175	0.2587	<.0001	0.000311535
Succinivibrionaceae UCG-001	0.001151	0.003988	0.00115	15.9119	14.9881	4.32669	0.0002	0.000697316
Prevotella_7	0.019954	0.033742	0.00974	8.06358	7.63467	2.20394	<.0001	0.000347476
Prevotellaceae YAB2003 group	0.109745	0.085468	0.02467	1.21679	0.677511	0.19558	<.0001	0.000387181
Ruminococcaceae_uncultured	0.519562	0.301693	0.08709	0.047582	0.053496	0.01544	<.0001	0.000347476
Shuttleworthia	0.07214	0.062471	0.01803	0.707971	0.464782	0.13417	<.0001	0.000387181
p-251-o5_norank	0.849181	0.423492	0.12225	0.207978	0.21006	0.06064	0.0003	0.00091559
Prevotellaceae UCG-003	3.43049	1.70798	0.49305	0.897147	0.68177	0.19681	0.0001	0.000539309
UCG-010_norank	0.579807	0.284167	0.08203	0.157711	0.18885	0.05452	0.0003	0.000803553
Christensenellaceae R-7 group	2.24747	0.653457	0.18864	0.611656	0.606942	0.17521	<.0001	0.000431883
Lachnospiraceae_uncultured	1.79775	1.20812	0.34875	0.492318	0.5729	0.16538	0.0015	0.00261829
Lachnospiraceae_Unclassified	0.387945	0.27899	0.08054	1.3768	0.758619	0.21899	0.0004	0.00106833
Succinivibrionaceae UCG-002	0.556783	0.517778	0.14947	0.161932	0.30774	0.08884	0.0091	0.0132303
F082_norank	3.98075	1.40981	0.40698	1.21525	0.883506	0.25505	0.0001	0.000539309
NK4A214 group	4.36448	1.66374	0.48028	1.49959	0.990025	0.2858	<.0001	0.000387181
Bacteroidales RF16 group_norank	1.18302	0.485366	0.14011	0.420561	0.38422	0.11091	0.0008	0.00167201
[Eubacterium] coprostanoligenes group_norank	1.01572	0.282077	0.08143	0.393701	0.303621	0.08765	0.0002	0.000697316
Selenomonas	0.818867	0.508463	0.14678	2.10549	0.861892	0.24881	0.0008	0.00167201
UCG-002	1.01572	0.327839	0.09464	0.403678	0.344563	0.09947	0.0008	0.00167201
Rikenellaceae RC9 gut group	4.74283	1.33229	0.3846	2.02261	1.46993	0.42433	0.001	0.00194189
Lachnospiraceae AC2044 group	0.603982	0.354796	0.10242	0.307747	0.282046	0.08142	0.0303	0.040803
UCG-005	1.74901	0.504559	0.14565	0.898682	0.531223	0.15335	0.0012	0.00225526
Lachnospiraceae NK3A20 group	0.69454	0.211404	0.06103	0.38641	0.212347	0.0613	0.0029	0.00488876
Prevotellaceae UCG-004	1.10858	0.593318	0.17128	0.626621	0.279337	0.08064	0.0225	0.0315654
Prevotellaceae NK3B31 group	0.526853	0.173467	0.05008	0.317723	0.135719	0.03918	0.0051	0.0080956
Muribaculaceae_norank	3.79004	1.7808	0.51407	2.33803	1.6799	0.48495	0.0056	0.00849681
Absconditabacteriales (SR1)_norank	0.712192	0.434912	0.12555	0.482341	0.334577	0.09658	0.157	0.177294
Saccharofermentans	0.90981	0.505508	0.14593	0.641203	0.292442	0.08442	0.1123	0.140341
Prevotellaceae UCG-001	2.70142	0.818018	0.23614	2.25476	0.813358	0.2348	0.119	0.14366
[Eubacterium] ruminantium group	0.889088	0.368383	0.10634	1.06483	0.348903	0.10072	0.1658	0.181305
Prevotella	38.0217	10.0122	2.89028	32.1772	13.1787	3.80437	0.1489	0.173734
Succiniclasticum	2.55483	1.15401	0.33313	2.16919	1.63001	0.47054	0.106	0.137367
Clostridia UCG-014_norank	1.87718	0.510354	0.14733	2.18914	0.96509	0.2786	0.686	0.72762
Treponema	1.0775	0.429447	0.12397	1.24327	0.954582	0.27556	0.8625	0.86249
Ruminococcus	2.53641	1.08798	0.31407	2.49382	0.998194	0.28815	0.8174	0.841401
