# Supplementary material for: Distinct microbial hydrogen and reductant disposal pathways explain interbreed variations in ruminant methane yield
Source: Research Square preprint supplement (doi:10.21203/rs.3.rs-2831003/v1), 2024-04-11
Supplement: Supplementary file 10 [file aa8de8abaf2f0acaefcaf735.xlsx]

## Sheet: quality and tax
Genome ID	Completeness (%)	Contamination (%)	Strain heterogeneity	Quality assessment	Marker lineage	Genome size (bp)	GC (%)	Number of contigs	Longest contig (bp)	N50 (bp)	Mean contig length (bp)	Domain	Phylum	Class	Order	Family	Genus	Species
MAG1	91.4	4.33	63.64	High	o__Clostridiales (UID1212)	2181949	0.605301	196	56692	15013	11132.4	Bacteria	Firmicutes_A	Clostridia	Oscillospirales	Oscillospiraceae	CAG-110
MAG10	90.87	0.33	100	High	p__Bacteroidetes (UID2605)	2243839	0.622489	151	65148	21191	14859.9	Bacteria	Bacteroidota	Bacteroidia	Bacteroidales	UBA932	RC9
MAG100	83.07	2.59	71.43	Medium	f__Mycoplasmataceae (UID2414)	473966	0.286582	83	22042	6676	5710.43	Bacteria	Firmicutes	Bacilli	Mycoplasmatales	Mycoplasmoidaceae	Malacoplasma_A
MAG101	87.45	8.18	75.76	Medium	o__Bacteroidales (UID2617)	2606302	0.539408	239	45476	17930	10905	Bacteria	Bacteroidota	Bacteroidia	Bacteroidales	Muribaculaceae	C941	C941 sp900320055
MAG102	82.48	8.08	56.52	Medium	p__Bacteroidetes (UID2605)	2187500	0.561346	241	47795	11878	9076.76	Bacteria	Bacteroidota	Bacteroidia	Bacteroidales	UBA932	RC9
MAG103	90.62	2.16	87.5	High	p__Bacteroidetes (UID2605)	2448762	0.557514	205	60591	17627	11945.2	Bacteria	Bacteroidota	Bacteroidia	Bacteroidales	UBA932	RC9	RC9 sp900320795
MAG104	84.45	0.74	0	Medium	o__Bacteroidales (UID2657)	2773330	0.466757	96	136031	42277	28888.9	Bacteria	Bacteroidota	Bacteroidia	Bacteroidales	Bacteroidaceae	UBA4372
MAG105	94.18	3.2	50	High	p__Euryarchaeota (UID3)	1502563	0.359109	164	46288	11058	9161.97	Archaea	Euryarchaeota	Methanobacteria	Methanobacteriales	Methanobacteriaceae	Methanobrevibacter_A	Methanobrevibacter_A sp900313645
MAG106	85.42	4.09	60	Medium	f__Lachnospiraceae (UID1255)	2964472	0.544641	445	47507	7885	6661.73	Bacteria	Firmicutes_A	Clostridia	Lachnospirales	Lachnospiraceae	CAG-791
MAG107	90.51	4.5	31.58	High	p__Bacteroidetes (UID2605)	2745939	0.530695	208	133041	22152	13201.6	Bacteria	Bacteroidota	Bacteroidia	Bacteroidales	UBA932	RC9
MAG108	88.65	4.51	47.83	Medium	o__Bacteroidales (UID2716)	2804227	0.481617	168	105227	27813	16691.8	Bacteria	Bacteroidota	Bacteroidia	Bacteroidales	Bacteroidaceae	Prevotella
MAG109	93.46	0	0	High	f__Mycoplasmataceae (UID2414)	570176	0.27025	20	82820	38765	28508.8	Bacteria	Firmicutes	Bacilli	Mycoplasmatales	Mycoplasmoidaceae	Malacoplasma_A	Malacoplasma_A sp900316595
MAG11	97.39	0.68	0	High	o__Bacteroidales (UID2716)	3494089	0.497703	77	199211	76492	45377.8	Bacteria	Bacteroidota	Bacteroidia	Bacteroidales	Bacteroidaceae	Prevotella	Prevotella sp900314655
MAG110	83.94	2.24	75	Medium	o__Clostridiales (UID1212)	1844376	0.521653	291	34848	7411	6338.06	Bacteria	Firmicutes_A	Clostridia	Oscillospirales	Acutalibacteraceae	Ruminococcus_E	Ruminococcus_E sp900316555
MAG111	86.41	1.73	50	Medium	o__Clostridiales (UID1212)	1898166	0.524806	267	55935	8651	7109.24	Bacteria	Firmicutes_A	Clostridia	Oscillospirales	Oscillospiraceae	UBA2922
MAG112	89.63	3.19	83.33	Medium	o__Clostridiales (UID1212)	1967919	0.612259	299	39132	7684	6581.67	Bacteria	Firmicutes_A	Clostridia	Oscillospirales	Oscillospiraceae	CAG-110	CAG-110 sp900315595
MAG113	97.75	2.3	0	High	k__Bacteria (UID2329)	1136603	0.365733	20	177622	100516	56830.2	Bacteria	Firmicutes	Bacilli	RFN20	CAG-826	UBA3207	UBA3207 sp900314585
MAG114	90.05	3.1	54.55	High	p__Bacteroidetes (UID2605)	1964889	0.581787	168	60623	18028	11695.8	Bacteria	Bacteroidota	Bacteroidia	Bacteroidales	UBA932	RC9	RC9 sp002396335
MAG115	97.32	0.67	0	High	o__Clostridiales (UID1212)	1824663	0.397583	77	146769	35278	23696.9	Bacteria	Firmicutes_A	Clostridia	Lachnospirales	Lachnospiraceae	UBA3212	UBA3212 sp002363615
MAG116	94.13	0.48	100	High	p__Bacteroidetes (UID2605)	2415302	0.574708	83	146024	54349	29100	Bacteria	Bacteroidota	Bacteroidia	Bacteroidales	UBA932	RC9
MAG117	94.53	0.88	33.33	High	o__Bacteroidales (UID2617)	2756152	0.47117	75	205865	54844	36748.7	Bacteria	Bacteroidota	Bacteroidia	Bacteroidales	Muribaculaceae	C941	C941 sp900316835
MAG118	88.91	0.74	0	Medium	o__Bacteroidales (UID2716)	2690362	0.521468	56	256095	109934	48042.2	Bacteria	Bacteroidota	Bacteroidia	Bacteroidales	Bacteroidaceae	Prevotella
MAG119	86.51	0.16	100	Medium	p__Bacteroidetes (UID2605)	1764105	0.57004	181	39326	11896	9746.44	Bacteria	Bacteroidota	Bacteroidia	Bacteroidales	UBA932	RC9	RC9 sp900320385
MAG12	87.63	3.92	56.25	Medium	k__Bacteria (UID2569)	2247968	0.576299	226	60432	13012	9946.76	Bacteria	Bacteroidota	Bacteroidia	Bacteroidales	P3	UBA1711	UBA1711 sp002372855
MAG120	85.87	4.16	84.62	Medium	o__Clostridiales (UID1212)	1636384	0.617595	266	23319	7362	6151.82	Bacteria	Firmicutes_A	Clostridia	Oscillospirales	Oscillospiraceae	CAG-110	CAG-110 sp900315595
MAG121	95.86	0.45	100	High	o__Clostridiales (UID1212)	1716406	0.578393	119	67932	19419	14423.6	Bacteria	Firmicutes_A	Clostridia	Oscillospirales	Oscillospiraceae	NK3B98	NK3B98 sp900314485
MAG122	93.46	0.5	0	High	o__Bacteroidales (UID2617)	2784120	0.548421	211	62327	17667	13194.9	Bacteria	Bacteroidota	Bacteroidia	Bacteroidales	Muribaculaceae	C941
MAG123	92.11	1.48	20	High	o__Bacteroidales (UID2716)	2679018	0.476368	155	104344	28017	17284	Bacteria	Bacteroidota	Bacteroidia	Bacteroidales	Bacteroidaceae	Prevotella
MAG124	93.01	2.15	80	High	k__Bacteria (UID2569)	2092861	0.564151	73	194997	47473	28669.3	Bacteria	Bacteroidota	Bacteroidia	Bacteroidales	P3	UBA1711
MAG125	81.06	5.24	26.67	Medium	o__Clostridiales (UID1212)	2161570	0.620074	303	38343	8723	7133.89	Bacteria	Firmicutes_A	Clostridia	Oscillospirales	Oscillospiraceae	CAG-110
MAG126	89.23	1.15	50	Medium	f__Mycoplasmataceae (UID2414)	501727	0.285982	54	28041	13016	9291.24	Bacteria	Firmicutes	Bacilli	Mycoplasmatales	Mycoplasmoidaceae	Malacoplasma_A
MAG127	81.61	0	0	Medium	c__Gammaproteobacteria (UID4201)	2094333	0.43986	202	56343	14648	10368	Bacteria	Proteobacteria	Gammaproteobacteria	Enterobacterales	Succinivibrionaceae	UBA2804	UBA2804 sp900319705
MAG128	84.77	2.01	75	Medium	o__Clostridiales (UID1212)	1363108	0.531761	198	36786	8157	6884.38	Bacteria	Firmicutes_A	Clostridia	Oscillospirales	Acutalibacteraceae	Ruminococcus_E	Ruminococcus_E sp900316555
MAG129	83.14	3.27	18.18	Medium	p__Euryarchaeota (UID3)	1693259	0.311436	318	27773	5911	5324.71	Archaea	Euryarchaeota	Methanobacteria	Methanobacteriales	Methanobacteriaceae	Methanobrevibacter_A	Methanobrevibacter_A sp900319535
MAG13	96.98	2.01	33.33	High	o__Clostridiales (UID1212)	3934914	0.421642	273	71964	22064	14413.6	Bacteria	Firmicutes_A	Clostridia	Lachnospirales	Lachnospiraceae	TF01-11
MAG130	65.95	2.44	0	Medium	f__Lachnospiraceae (UID1286)	2044629	0.58365	302	31073	7775	6770.29	Bacteria	Firmicutes_A	Clostridia	Lachnospirales	Lachnospiraceae	CAG-791
MAG131	50	8.62	16.67	Medium	k__Bacteria (UID203)	1201962	0.482287	186	21805	7322	6462.16	Bacteria	Firmicutes_C	Negativicutes	Selenomonadales	Selenomonadaceae	Anaerovibrio
MAG132	50.91	0	0	Medium	k__Bacteria (UID203)	1449879	0.559742	236	22054	6983	6143.56	Bacteria	Spirochaetota	Spirochaetia	Treponematales	Treponemataceae	Treponema_D
MAG133	57.72	0	0	Medium	o__Clostridiales (UID1212)	2268217	0.477501	72	196109	52562	31503	Bacteria	Firmicutes_A	Clostridia	Oscillospirales	Ruminococcaceae	Ruminococcus_D
MAG134	51.42	0.67	50	Medium	o__Clostridiales (UID1212)	1273473	0.523837	176	23987	8370	7235.64	Bacteria	Firmicutes_A	Clostridia	Oscillospirales	Ruminococcaceae	CAG-353
MAG135	60.27	1.72	0	Medium	k__Bacteria (UID203)	1630711	0.398714	225	41859	8387	7247.6	Bacteria	Proteobacteria	Gammaproteobacteria	Enterobacterales	Succinivibrionaceae	Succinivibrio	Succinivibrio sp900317105
MAG136	91.55	3.03	10.53	High	k__Bacteria (UID203)	2251886	0.376949	128	68271	24544	17592.9	Bacteria	Firmicutes_A	Clostridia	Lachnospirales	Lachnospiraceae	Lachnospira	Lachnospira eligens_B
MAG137	50.88	1.75	0	Medium	k__Bacteria (UID203)	1682173	0.628337	327	21072	5488	5144.26	Bacteria	Firmicutes_A	Clostridia	Lachnospirales	Lachnospiraceae
MAG138	66.92	1.41	0	Medium	o__Clostridiales (UID1212)	1079148	0.282399	57	89621	41185	18932.4	Bacteria	Firmicutes_A	Clostridia	TANB77	CAG-508	CAG-793
MAG139	61.39	3.33	7.69	Medium	f__Lachnospiraceae (UID1286)	1362013	0.598985	261	23559	5487	5218.44	Bacteria	Firmicutes_A	Clostridia	Lachnospirales	Lachnospiraceae	CAG-791	CAG-791 sp002449595
MAG14	88.95	1.83	14.29	Medium	p__Bacteroidetes (UID2605)	2304877	0.537035	207	97752	15531	11134.7	Bacteria	Bacteroidota	Bacteroidia	Bacteroidales	UBA932	RC9
MAG140	55.91	2.01	20	Medium	o__Clostridiales (UID1212)	1124580	0.56656	78	75295	23502	14417.7	Bacteria	Firmicutes_A	Clostridia	Oscillospirales	Oscillospiraceae	UBA1777
MAG141	81.02	0	0	Medium	k__Bacteria (UID1452)	2364030	0.495806	141	93833	23217	16766.2	Bacteria	Eremiobacterota	UBP9	UBA4705	UBA4705	UBA4705	UBA4705 sp900313515
MAG142	77.27	2.27	22.22	Medium	o__Clostridiales (UID1212)	1673868	0.655855	225	34294	9031	7439.41	Bacteria	Firmicutes_A	Clostridia	Oscillospirales	Oscillospiraceae
MAG143	58.57	4.29	10	Medium	p__Bacteroidetes (UID2605)	1366107	0.546742	163	47687	10177	8381.02	Bacteria	Bacteroidota	Bacteroidia	Bacteroidales	UBA932	RC9	RC9 sp002350615
MAG144	53.12	3.08	42.86	Medium	o__Clostridiales (UID1212)	920566	0.409134	180	16560	5285	5114.26	Bacteria	Firmicutes_A	Clostridia	Oscillospirales	Acutalibacteraceae	RUG592	RUG592 sp900320535
MAG145	86.27	8.49	12.5	Medium	o__Clostridiales (UID1212)	2269764	0.375734	208	94057	15792	10912.3	Bacteria	Firmicutes_A	Clostridia	Lachnospirales	Lachnospiraceae	Eubacterium_Q	Eubacterium_Q ruminantium
MAG146	53.99	1.75	0	Medium	k__Bacteria (UID203)	1692085	0.470543	225	33831	8979	7520.38	Bacteria	Firmicutes_A	Clostridia	Lachnospirales	Lachnospiraceae	AC2028
MAG147	87.03	0	0	Medium	k__Bacteria (UID2372)	1763267	0.48031	74	69226	31396	23827.9	Bacteria	Firmicutes	Bacilli	Erysipelotrichales	Erysipelotrichaceae
MAG148	55.26	8.77	40	Medium	k__Bacteria (UID203)	995104	0.575919	182	20252	5774	5467.6	Bacteria	Firmicutes_A	Clostridia	Lachnospirales	Lachnospiraceae	UBA1267
MAG149	63.79	0	0	Medium	k__Bacteria (UID203)	707550	0.363563	145	18784	5261	4879.66	Bacteria	Proteobacteria	Alphaproteobacteria	UBA3830	UBA3830	UBA3830
MAG15	86.9	2.79	88.89	Medium	p__Bacteroidetes (UID2605)	2034373	0.573966	218	46316	12684	9331.99	Bacteria	Bacteroidota	Bacteroidia	Bacteroidales	UBA932	RC9	RC9 sp900320185
MAG150	93.68	0.73	50	High	o__Clostridiales (UID1212)	1956326	0.400725	108	85998	27616	18114.1	Bacteria	Firmicutes_A	Clostridia	Lachnospirales	Lachnospiraceae	CAG-590
MAG151	51.64	0	0	Medium	p__Actinobacteria (UID1454)	1041291	0.608971	169	24588	6928	6161.49	Bacteria	Actinobacteriota	Actinomycetia	Actinomycetales	Bifidobacteriaceae	Pseudoscardovia	Pseudoscardovia suis
MAG152	64.3	0.22	100	Medium	o__Clostridiales (UID1212)	1458331	0.589158	207	29216	8210	7045.08	Bacteria	Firmicutes_A	Clostridia	Oscillospirales	Acutalibacteraceae
MAG153	92.57	0.58	0	High	f__Lachnospiraceae (UID1286)	2483501	0.421527	128	76746	29512	19402.4	Bacteria	Firmicutes_A	Clostridia	Lachnospirales	Lachnospiraceae	Lachnobacterium
MAG154	63.39	0.94	0	Medium	o__Bacteroidales (UID2617)	1562845	0.56268	172	33278	10696	9086.31	Bacteria	Bacteroidota	Bacteroidia	Bacteroidales	Muribaculaceae	C941
MAG155	50.91	0	0	Medium	k__Bacteria (UID203)	766719	0.490193	58	45795	18002	13219.3	Bacteria	Spirochaetota	Spirochaetia	Treponematales	Treponemataceae	Treponema_D
MAG156	63.42	1.9	25	Medium	p__Bacteroidetes (UID2605)	1597769	0.547769	201	39249	10029	7949.1	Bacteria	Bacteroidota	Bacteroidia	Bacteroidales	UBA932	RC9
MAG157	54.94	0.7	100	Medium	f__Spirochaetaceae (UID2535)	1025316	0.440232	193	21059	5772	5312.52	Bacteria	Spirochaetota	Spirochaetia	Treponematales	Treponemataceae	Treponema_D	Treponema_D sp003447785
MAG158	57.75	1.82	0	Medium	o__Clostridiales (UID1120)	1375497	0.423308	96	79847	20167	14328.1	Bacteria	Firmicutes_A	Clostridia	Peptostreptococcales	Anaerovoracaceae	UBA1764
MAG159	52.53	0	0	Medium	o__Clostridiales (UID1212)	1002671	0.612285	184	18700	5831	5449.3	Bacteria	Firmicutes_A	Clostridia	Lachnospirales	Lachnospiraceae	UBA3774
MAG16	91.18	3.13	85.71	High	o__Clostridiales (UID1212)	2018492	0.611278	256	28654	9915	7884.73	Bacteria	Firmicutes_A	Clostridia	Oscillospirales	Oscillospiraceae	CAG-110	CAG-110 sp900315595
MAG160	86.05	6.7	25	Medium	f__Lachnospiraceae (UID1286)	2445066	0.422845	211	50046	15816	11588	Bacteria	Firmicutes_A	Clostridia	Lachnospirales	Lachnospiraceae	Agathobacter	Agathobacter sp900552085
MAG161	50.11	7.02	66.67	Medium	k__Bacteria (UID203)	1771121	0.490894	141	64645	16325	12561.1	Bacteria	Firmicutes_A	Clostridia	Oscillospirales	Ruminococcaceae	Ruminococcus_D
MAG162	57.89	3.51	0	Medium	k__Bacteria (UID203)	1214282	0.456569	204	23502	6594	5952.36	Bacteria	Firmicutes_A	Clostridia	Lachnospirales	Lachnospiraceae	NK4A136
MAG163	62.52	5.48	33.33	Medium	o__Clostridiales (UID1212)	1594980	0.408567	219	19986	8588	7283.01	Bacteria	Firmicutes_A	Clostridia	Lachnospirales	Lachnospiraceae	Eubacterium_Q
MAG164	64.33	0	0	Medium	k__Bacteria (UID203)	1797421	0.512338	176	50004	12231	10212.6	Bacteria	Firmicutes_A	Clostridia	Lachnospirales	Lachnospiraceae	Eubacterium_Q
MAG165	51.5	5.17	66.67	Medium	k__Bacteria (UID203)	1160655	0.521929	172	32467	7235	6747.99	Bacteria	Bacteroidota	Bacteroidia	Bacteroidales	UBA932	RC9
MAG166	65.67	0	0	Medium	k__Bacteria (UID203)	1766171	0.621886	145	58660	16205	12180.5	Bacteria	Firmicutes_A	Clostridia	Oscillospirales	Oscillospiraceae	CAG-170
MAG167	71.55	0	0	Medium	k__Bacteria (UID203)	1040114	0.420956	165	21409	7038	6303.72	Bacteria	Firmicutes	Bacilli	Erysipelotrichales	Erysipelotrichaceae	RUG521
MAG168	54.19	1.34	0	Medium	o__Clostridiales (UID1212)	1081783	0.604513	71	69411	22442	15236.4	Bacteria	Firmicutes_A	Clostridia	Oscillospirales	Oscillospiraceae	ER4
MAG169	81.34	1.34	0	Medium	o__Clostridiales (UID1212)	2373349	0.49299	296	38447	9827	8018.07	Bacteria	Firmicutes_A	Clostridia	Lachnospirales	Lachnospiraceae	Eubacterium_Q
MAG17	99.33	0	0	High	o__Clostridiales (UID1212)	2765225	0.48307	57	216184	80603	48512.7	Bacteria	Firmicutes_A	Clostridia	Oscillospirales	Ruminococcaceae	Ruminococcus
MAG170	62.44	2.01	66.67	Medium	o__Clostridiales (UID1212)	903914	0.481895	56	61933	22749	16141.3	Bacteria	Firmicutes_A	Clostridia	Oscillospirales	Acutalibacteraceae	Ruminococcus_E	Ruminococcus_E sp900315785
MAG171	80.31	2.19	0	Medium	k__Bacteria (UID2982)	2644442	0.637552	401	37190	8090	6594.62	Bacteria	Verrucomicrobiota	Kiritimatiellae	RFP12
MAG172	81.29	2.14	6.25	Medium	f__Lachnospiraceae (UID1295)	2770652	0.404092	310	43173	10909	8937.59	Bacteria	Firmicutes_A	Clostridia	Lachnospirales	Lachnospiraceae	Butyrivibrio	Butyrivibrio fibrisolvens_C
MAG173	54.39	0.88	100	Medium	k__Bacteria (UID203)	694990	0.444507	61	61820	14336	11393.3	Bacteria	Firmicutes	Bacilli	RFN20	CAG-826	UBA4951	UBA4951 sp900320745
MAG174	50.95	2.63	100	Medium	k__Bacteria (UID203)	1765036	0.400552	165	37782	13708	10697.2	Bacteria	Firmicutes_A	Clostridia	Lachnospirales	Lachnospiraceae	Eubacterium_Q
MAG175	73.83	0.35	100	Medium	f__Spirochaetaceae (UID2535)	1555487	0.465612	231	23395	7746	6733.71	Bacteria	Spirochaetota	Spirochaetia	Treponematales	Treponemataceae	Treponema_D	Treponema_D sp002369025
MAG176	95.48	0.48	0	High	f__Lachnospiraceae (UID1286)	2166376	0.40195	34	436731	133667	63716.9	Bacteria	Firmicutes_A	Clostridia	Lachnospirales	Lachnospiraceae	FD2005
MAG177	67.96	0	0	Medium	o__Clostridiales (UID1212)	1448567	0.5102	44	197703	81683	32922	Bacteria	Firmicutes_A	Clostridia	Oscillospirales	CAG-272	CAG-724
MAG178	78.94	0.23	0	Medium	f__Veillonellaceae (UID1032)	1630348	0.598641	177	67227	12117	9211.01	Bacteria	Firmicutes_C	Negativicutes	Selenomonadales	Selenomonadaceae	Mitsuokella	Mitsuokella multacida
MAG179	71.57	0.76	0	Medium	o__Clostridiales (UID1226)	1815666	0.489914	182	72941	13917	9976.19	Bacteria	Firmicutes_A	Clostridia	Lachnospirales	Lachnospiraceae	TWA4
MAG18	80.13	3.6	25	Medium	o__Bacteroidales (UID2716)	3062451	0.53301	157	150565	34102	19506.1	Bacteria	Bacteroidota	Bacteroidia	Bacteroidales	Bacteroidaceae	Prevotella	Prevotella sp900316285
MAG180	78.3	0	0	Medium	o__Clostridiales (UID1212)	1804037	0.59879	204	40984	10681	8843.32	Bacteria	Firmicutes_A	Clostridia	Oscillospirales	CAG-272	CAG-390
MAG181	57.19	3.51	50	Medium	k__Bacteria (UID203)	2273636	0.533421	313	50785	8562	7264.01	Bacteria	Firmicutes_A	Clostridia	Lachnospirales	Lachnospiraceae
MAG182	51.72	0	0	Medium	k__Bacteria (UID203)	1471863	0.417709	209	31425	7763	7042.41	Bacteria	Bacteroidota	Bacteroidia	Bacteroidales	Bacteroidaceae	Phocaeicola
MAG183	65.61	1.75	0	Medium	k__Bacteria (UID203)	1622540	0.501316	159	50745	12363	10204.7	Bacteria	Firmicutes_A	Clostridia	Lachnospirales	UBA1390	RUG760
MAG184	55.15	1.75	0	Medium	k__Bacteria (UID203)	934963	0.637277	198	17368	4845	4722.04	Bacteria	Desulfobacterota	Desulfovibrionia	Desulfovibrionales	Desulfovibrionaceae	Mailhella
MAG185	89.92	0	0	Medium	o__Clostridiales (UID1212)	1675092	0.482937	226	29355	8632	7411.91	Bacteria	Firmicutes_A	Clostridia	Oscillospirales	Acutalibacteraceae	UBA1213	UBA1213 sp900322105
MAG186	56.41	6.35	33.33	Medium	k__Bacteria (UID203)	1451418	0.565589	144	67838	13025	10079.3	Bacteria	Firmicutes_A	Clostridia	Oscillospirales	Oscillospiraceae	UBA1777
MAG187	51.09	0.93	0	Medium	k__Archaea (UID2)	1289678	0.307205	236	20296	5908	5464.74	Archaea	Euryarchaeota	Methanobacteria	Methanobacteriales	Methanobacteriaceae	Methanobrevibacter_A	Methanobrevibacter_A sp900319535
MAG188	80.12	1.3	0	Medium	o__Bacteroidales (UID2657)	2049989	0.37164	161	70901	18957	12732.9	Bacteria	Bacteroidota	Bacteroidia	Bacteroidales	Bacteroidaceae	UBA1786
MAG189	68.26	3.45	33.33	Medium	k__Bacteria (UID203)	1800624	0.366379	321	31087	6401	5609.42	Bacteria	Firmicutes_A	Clostridia	Lachnospirales	Lachnospiraceae	TF01-11
MAG19	87.94	2.9	36.36	Medium	o__Bacteroidales (UID2716)	3418516	0.540288	141	107049	42663	24244.8	Bacteria	Bacteroidota	Bacteroidia	Bacteroidales	Bacteroidaceae	Prevotella
MAG190	78.22	0.89	0	Medium	o__Clostridiales (UID1212)	1736727	0.406538	205	34137	10221	8471.84	Bacteria	Firmicutes_A	Clostridia	Lachnospirales	Lachnospiraceae	Eubacterium_F	Eubacterium_F xylanophilum
MAG191	65.11	0	0	Medium	k__Bacteria (UID2328)	1025171	0.326457	167	28496	6667	6138.75	Bacteria	Firmicutes	Bacilli	Acholeplasmatales	Anaeroplasmataceae	Anaeroplasma
MAG192	64.66	0	0	Medium	k__Bacteria (UID203)	1547091	0.456651	184	30802	9681	8408.1	Bacteria	Bacteroidota	Bacteroidia	Bacteroidales	Bacteroidaceae	RUG210
MAG193	64.61	5.82	75	Medium	k__Bacteria (UID203)	1629009	0.540888	188	34621	10350	8664.94	Bacteria	Firmicutes_A	Clostridia_A	Christensenellales	CAG-138	UBA3792
MAG194	52.81	4.91	28.57	Medium	k__Bacteria (UID203)	1968697	0.411839	315	30090	7040	6249.83	Bacteria	Firmicutes_A	Clostridia	Lachnospirales	Lachnospiraceae	Eubacterium_Q
MAG195	68.47	0	0	Medium	p__Bacteroidetes (UID2605)	1268798	0.520164	155	26338	9659	8185.79	Bacteria	Bacteroidota	Bacteroidia	Bacteroidales	UBA932	RC9	RC9 sp900167925
MAG196	84.16	1.34	100	Medium	o__Clostridiales (UID1212)	1905309	0.518488	187	42202	14056	10188.8	Bacteria	Firmicutes_A	Clostridia	Lachnospirales	Lachnospiraceae	CAG-127
MAG197	58.94	4.72	0	Medium	k__Bacteria (UID2372)	924811	0.328403	196	19988	4846	4718.42	Bacteria	Firmicutes	Bacilli	RFN20	CAG-449	UBA3210
MAG198	54.65	0.21	0	Medium	o__Clostridiales (UID1226)	1509605	0.577482	267	17363	6138	5653.95	Bacteria	Firmicutes_A	Clostridia	Lachnospirales	Lachnospiraceae
MAG199	60.86	0.45	100	Medium	o__Clostridiales (UID1212)	1276297	0.556355	190	28603	7492	6717.35	Bacteria	Firmicutes_A	Clostridia	Lachnospirales	Lachnospiraceae	ISDg
MAG2	94.16	6.03	50	Medium	o__Clostridiales (UID1212)	2838497	0.323118	265	61217	15270	10711.3	Bacteria	Firmicutes_A	Clostridia	Lachnospirales	Lachnospiraceae	Eubacterium_S
MAG20	84.9	1.03	0	Medium	k__Bacteria (UID1453)	1979498	0.339477	184	69270	15997	10758.1	Bacteria	Cyanobacteria	Vampirovibrionia	Gastranaerophilales	Gastranaerophilaceae	UBA1221
MAG200	71.27	6.76	20	Medium	k__Bacteria (UID2982)	1633191	0.618604	236	27673	8376	6920.3	Bacteria	Verrucomicrobiota	Kiritimatiellae	RFP12	UBA1067	UBA1067	UBA1067 sp002395905
MAG201	71.25	2.35	50	Medium	o__Clostridiales (UID1212)	871800	0.428713	105	45743	9817	8302.86	Bacteria	Firmicutes_A	Clostridia	Oscillospirales	Acutalibacteraceae	UBA737
MAG202	68.1	1.72	100	Medium	k__Bacteria (UID203)	1575828	0.6605	219	41856	8801	7195.56	Bacteria	Actinobacteriota	Coriobacteriia	Coriobacteriales	Atopobiaceae	Olsenella	Olsenella umbonata
MAG203	53.52	6.77	16.67	Medium	o__Clostridiales (UID1212)	1575825	0.610524	239	47666	7854	6593.41	Bacteria	Firmicutes_A	Clostridia	Oscillospirales	Oscillospiraceae	UBA738
MAG204	75.47	0.67	0	Medium	o__Clostridiales (UID1212)	1647827	0.622258	104	59662	23563	15844.5	Bacteria	Firmicutes_A	Clostridia	Oscillospirales	Acutalibacteraceae	DTU089_A
MAG205	51.64	0	0	Medium	k__Bacteria (UID203)	979975	0.33022	169	23563	6473	5798.67	Bacteria	Firmicutes	Bacilli	RF39	CAG-611	UBA3789
MAG206	71.61	2.2	10	Medium	o__Bacteroidales (UID2617)	1817153	0.53458	187	55905	12725	9717.4	Bacteria	Bacteroidota	Bacteroidia	Bacteroidales	Muribaculaceae	C941
MAG207	53.93	5.17	50	Medium	k__Bacteria (UID203)	1354772	0.539637	204	37572	7494	6641.04	Bacteria	Firmicutes_A	Clostridia	Oscillospirales	Acutalibacteraceae	Ruminococcus_E
MAG208	95.33	0	0	High	k__Bacteria (UID2495)	2240510	0.574871	138	92291	24176	16235.6	Bacteria	Spirochaetota	Spirochaetia	Sphaerochaetales	Sphaerochaetaceae	RUG023	RUG023 sp900315435
MAG209	51.75	7.02	25	Medium	k__Bacteria (UID203)	1883126	0.374148	365	16296	5431	5159.25	Bacteria	Firmicutes_A	Clostridia	Lachnospirales	Lachnospiraceae	CAG-411
MAG21	81.32	0.59	40	Medium	o__Bacteroidales (UID2716)	1555306	0.485531	59	176238	48867	26361.1	Bacteria	Bacteroidota	Bacteroidia	Bacteroidales	Bacteroidaceae	Prevotella
MAG210	59.31	3.45	0	Medium	k__Bacteria (UID203)	1527184	0.470022	168	41427	10997	9090.38	Bacteria	Bacteroidota	Bacteroidia	Bacteroidales	Bacteroidaceae	UBA4372
MAG211	52.68	7.57	48.48	Medium	o__Clostridiales (UID1212)	1980431	0.391817	247	46232	10117	8017.94	Bacteria	Firmicutes_A	Clostridia	Lachnospirales	Lachnospiraceae	Eubacterium_Q
MAG212	84.76	0.63	0	Medium	o__Clostridiales (UID1226)	2110551	0.475101	137	69741	23787	15405.5	Bacteria	Firmicutes_A	Clostridia	Lachnospirales	Lachnospiraceae
MAG213	55.22	0	0	Medium	k__Bacteria (UID203)	1233393	0.61935	209	30351	6722	5901.4	Bacteria	Firmicutes_A	Clostridia	Oscillospirales	Oscillospiraceae	UBA1774
MAG214	60.5	1.72	0	Medium	k__Bacteria (UID203)	2293423	0.555958	320	38215	9011	7166.95	Bacteria	Firmicutes_A	Clostridia	Oscillospirales	Ruminococcaceae	Firm-04	Firm-04 sp001603005
MAG215	58.07	1.72	0	Medium	k__Bacteria (UID203)	2044934	0.514456	200	63729	13383	10224.7	Bacteria	Firmicutes_A	Clostridia	Oscillospirales	Acutalibacteraceae	RUG762
MAG216	55.17	0	0	Medium	k__Bacteria (UID203)	633304	0.648758	149	12968	4246	4250.36	Bacteria	Firmicutes_A	Clostridia	Oscillospirales	Acutalibacteraceae	UMGS1858
MAG217	56.8	1.61	0	Medium	f__Lachnospiraceae (UID1286)	1068317	0.398598	158	29225	7805	6761.5	Bacteria	Firmicutes_A	Clostridia	Lachnospirales	Lachnospiraceae	UBA629
MAG218	69.35	0.32	0	Medium	f__Lachnospiraceae (UID1286)	1545069	0.314102	60	111783	45379	25751.2	Bacteria	Firmicutes_A	Clostridia	Lachnospirales	Lachnospiraceae	Lachnobacterium	Lachnobacterium bovis
MAG219	67.92	0.21	0	Medium	o__Clostridiales (UID1226)	1358560	0.456507	207	23531	7206	6563.09	Bacteria	Firmicutes_A	Clostridia	Lachnospirales	Lachnospiraceae	UBA1201_A
MAG22	84.27	3.05	72.73	Medium	o__Bacteroidales (UID2657)	2470564	0.464582	419	30983	6568	5896.33	Bacteria	Bacteroidota	Bacteroidia	Bacteroidales	Bacteroidaceae	Ga6A1	Ga6A1 sp900102385
MAG220	62.07	6.03	25	Medium	k__Bacteria (UID203)	1657383	0.515947	71	90748	32147	23343.4	Bacteria	Bacteroidota	Bacteroidia	Bacteroidales	Bacteroidaceae	Prevotella	Prevotella sp900319905
MAG221	75.77	6.55	45	Medium	f__Lachnospiraceae (UID1255)	1894479	0.454212	230	33750	10370	8236.87	Bacteria	Firmicutes_A	Clostridia	Lachnospirales	Lachnospiraceae	UBA3766
MAG222	75	2.59	100	Medium	k__Bacteria (UID203)	1969568	0.366936	252	46136	9493	7815.75	Bacteria	Proteobacteria	Gammaproteobacteria	Enterobacterales	Succinivibrionaceae	Succinivibrio	Succinivibrio sp000431835
MAG223	60.36	2.73	100	Medium	k__Bacteria (UID203)	1981426	0.383624	176	43192	14690	11258.1	Bacteria	Spirochaetota	Spirochaetia	Treponematales	Treponemataceae	Treponema_D	Treponema_D sp002350445
MAG224	66.38	3.45	50	Medium	k__Bacteria (UID203)	1217682	0.434987	199	34929	6821	6119.01	Bacteria	Firmicutes_A	Clostridia	Oscillospirales	Acutalibacteraceae	CAG-180
MAG225	65.52	6.9	0	Medium	k__Bacteria (UID203)	2770518	0.455963	318	45162	11507	8712.32	Bacteria	Bacteroidota	Bacteroidia	Bacteroidales	Bacteroidaceae	Prevotella	Prevotella sp900315075
MAG226	67.24	6.9	25	Medium	k__Bacteria (UID203)	2263024	0.417189	216	50952	14613	10477	Bacteria	Firmicutes_A	Clostridia	Oscillospirales	Acutalibacteraceae	UBA1213	UBA1213 sp002351795
MAG227	54.85	5.15	8.33	Medium	k__Bacteria (UID2982)	2514988	0.631067	506	32721	5377	4970.33	Bacteria	Verrucomicrobiota	Kiritimatiellae	RFP12	UBA1067	UBA1067
MAG228	82.26	0.6	33.33	Medium	f__Lachnospiraceae (UID1286)	1613996	0.478633	156	47663	14261	10346.1	Bacteria	Firmicutes_A	Clostridia	Lachnospirales	Lachnospiraceae	RUG306	RUG306 sp900313435
MAG229	84.11	0	0	Medium	o__Clostridiales (UID1212)	1700802	0.490846	154	55866	15144	11044.2	Bacteria	Firmicutes_A	Clostridia	Oscillospirales	Acutalibacteraceae	CAG-177
MAG23	94.86	1.67	20	High	o__Bacteroidales (UID2657)	2731230	0.427317	72	217029	58982	37933.8	Bacteria	Bacteroidota	Bacteroidia	Bacteroidales	Bacteroidaceae	UBA4293	UBA4293 sp002395835
MAG230	55.86	5.17	0	Medium	k__Bacteria (UID203)	1568470	0.622197	254	48300	6970	6175.08	Bacteria	Firmicutes_A	Clostridia	Oscillospirales	Oscillospiraceae	CAG-83
MAG231	89.07	0	0	Medium	o__Clostridiales (UID1212)	2346337	0.374326	159	74920	22328	14756.8	Bacteria	Firmicutes_A	Clostridia	Lachnospirales	Lachnospiraceae
MAG232	71.92	0.44	0	Medium	o__Clostridiales (UID1212)	1456854	0.572592	121	55429	16176	12040.1	Bacteria	Firmicutes_A	Clostridia	Oscillospirales	CAG-382	UBA1752
MAG233	88.07	1.73	28.57	Medium	o__Clostridiales (UID1212)	2508270	0.475086	177	62337	17914	14171	Bacteria	Firmicutes_A	Clostridia	Lachnospirales	Lachnospiraceae	CAG-127	CAG-127 sp900321145
MAG234	82.44	2.15	0	Medium	k__Bacteria (UID2565)	1106256	0.416336	108	46247	13777	10243.1	Bacteria	Proteobacteria	Alphaproteobacteria	RF32	CAG-239	51-20
MAG235	61.6	0.67	0	Medium	o__Clostridiales (UID1212)	2209732	0.485146	159	94687	19858	13897.7	Bacteria	Firmicutes_A	Clostridia	Oscillospirales	Ruminococcaceae	Ruminococcus_D
MAG236	53.16	0	0	Medium	k__Bacteria (UID203)	2280206	0.535207	208	76837	15290	10962.5	Bacteria	Firmicutes_A	Clostridia_A	Christensenellales	CAG-74	UBA2943	UBA2943 sp002350845
MAG237	55.17	0.57	100	Medium	k__Bacteria (UID203)	608711	0.411164	47	51341	18261	12951.3	Bacteria	Patescibacteria	Saccharimonadia	Saccharimonadales	Saccharimonadaceae	UBA2866
MAG238	69.69	5.35	4	Medium	o__Clostridiales (UID1212)	1529650	0.290432	158	53904	13927	9681.33	Bacteria	Firmicutes_A	Clostridia	TANB77	CAG-508
MAG239	68.9	5.26	33.33	Medium	k__Bacteria (UID203)	1130579	0.464531	178	21285	7074	6351.57	Bacteria	Firmicutes	Bacilli	RFN20	CAG-826	UBA733
MAG24	90.05	2.15	50	High	k__Bacteria (UID2569)	2495760	0.497298	74	190429	48356	33726.5	Bacteria	Bacteroidota	Bacteroidia	Bacteroidales	P3	UBA1217
MAG240	52.8	5.61	0	Medium	k__Archaea (UID2)	861432	0.35695	158	17447	6162	5452.1	Archaea	Euryarchaeota	Methanobacteria	Methanobacteriales	Methanobacteriaceae	Methanobrevibacter_A	Methanobrevibacter_A sp900313645
MAG241	59.8	1.72	100	Medium	k__Bacteria (UID203)	1362808	0.443341	219	23275	7370	6222.87	Bacteria	Firmicutes_A	Clostridia	Oscillospirales	Acutalibacteraceae	Eubacterium_R
MAG242	93.46	0.95	20	High	o__Burkholderiales (UID4000)	5793110	0.676378	567	67346	14342	10217.1	Bacteria	Proteobacteria	Gammaproteobacteria	Burkholderiales	Burkholderiaceae	Achromobacter	Achromobacter dolens
MAG243	87.79	2.24	50	Medium	o__Clostridiales (UID1212)	2080912	0.583906	206	59576	13487	10101.5	Bacteria	Firmicutes_A	Clostridia	Oscillospirales	Butyricicoccaceae	UMGS1384
MAG244	83.22	4.7	44.44	Medium	o__Clostridiales (UID1212)	2114826	0.53167	141	114131	22574	14998.8	Bacteria	Firmicutes_A	Clostridia	Lachnospirales	Lachnospiraceae	Eubacterium_Q
MAG245	53.81	0.89	50	Medium	o__Clostridiales (UID1120)	1579496	0.488977	129	64396	16160	12244.2	Bacteria	Firmicutes_A	Clostridia	Saccharofermentanales	Saccharofermentanaceae	Saccharofermentans
MAG246	86.18	5.62	0	Medium	k__Bacteria (UID2329)	1499485	0.389307	116	55435	19063	12926.6	Bacteria	Firmicutes	Bacilli	RFN20	CAG-288	UBA7642
MAG247	63.09	1.14	40	Medium	f__Spirochaetaceae (UID2535)	1357858	0.487615	253	17469	5693	5367.03	Bacteria	Spirochaetota	Spirochaetia	Treponematales	Treponemataceae	Treponema_D
MAG248	50.86	1.72	0	Medium	k__Bacteria (UID203)	2082724	0.515452	151	46806	17069	13792.9	Bacteria	Bacteroidota	Bacteroidia	Bacteroidales	Bacteroidaceae	Prevotella
MAG249	81.85	0.16	30	Medium	p__Bacteroidetes (UID2605)	1596844	0.500668	93	72139	22965	17170.4	Bacteria	Bacteroidota	Bacteroidia	Bacteroidales	UBA932	RC9
MAG25	93.62	0.34	100	High	o__Clostridiales (UID1212)	2390131	0.59714	30	513723	136612	79671	Bacteria	Firmicutes_A	Clostridia	Oscillospirales	Oscillospiraceae	UBA1777
MAG250	78.43	0.67	100	Medium	o__Clostridiales (UID1212)	1398040	0.536607	117	90769	15052	11949.1	Bacteria	Firmicutes_A	Clostridia	Oscillospirales	CAG-382	UBA1206
MAG251	82.91	0	0	Medium	o__Clostridiales (UID1212)	2165951	0.493375	163	65222	18837	13288	Bacteria	Firmicutes_A	Clostridia	Lachnospirales	Lachnospiraceae	Eubacterium_Q
MAG252	57.54	0	0	Medium	k__Bacteria (UID203)	1663825	0.385895	264	37252	7172	6302.37	Bacteria	Firmicutes_A	Clostridia	Lachnospirales	Lachnospiraceae	CAG-590
MAG253	56.41	0.16	0	Medium	k__Bacteria (UID203)	1663920	0.332569	218	35082	9839	7632.66	Bacteria	Firmicutes_A	Clostridia	Lachnospirales	Lachnospiraceae	Eubacterium_S
MAG254	76.44	3.86	0	Medium	o__Clostridiales (UID1226)	1744747	0.557426	249	39028	8489	7007.02	Bacteria	Firmicutes_A	Clostridia	Lachnospirales	Lachnospiraceae	Clostridium_R	Clostridium_R sp003445895
MAG255	65.71	0.56	33.33	Medium	p__Bacteroidetes (UID2605)	1125878	0.545353	165	27695	7981	6823.5	Bacteria	Bacteroidota	Bacteroidia	Bacteroidales	UBA932	RC9
MAG256	72.83	0	0	Medium	o__Clostridiales (UID1120)	1491154	0.561982	191	45479	9344	7807.09	Bacteria	Firmicutes_A	Clostridia	Peptostreptococcales	Anaerovoracaceae	UBA1764
MAG257	53.92	5.26	0	Medium	k__Bacteria (UID203)	1778012	0.413223	258	25222	8430	6891.52	Bacteria	Firmicutes_A	Clostridia	Lachnospirales	Lachnospiraceae	Butyrivibrio	Butyrivibrio hungatei_B
MAG258	89.46	8.69	15.79	Medium	o__Clostridiales (UID1212)	3804648	0.526857	313	59836	16352	12155.4	Bacteria	Firmicutes_A	Clostridia	Oscillospirales	Ruminococcaceae	Firm-04
MAG259	90.76	1.61	0	High	f__Lachnospiraceae (UID1286)	2363331	0.412552	192	104551	16216	12309	Bacteria	Firmicutes_A	Clostridia	Lachnospirales	Lachnospiraceae	Agathobacter
MAG26	85.82	1.48	41.67	Medium	p__Bacteroidetes (UID2605)	2000884	0.574277	242	45914	10636	8268.12	Bacteria	Bacteroidota	Bacteroidia	Bacteroidales	UBA932	RC9	RC9 sp900320185
MAG260	75.57	0.34	100	Medium	o__Clostridiales (UID1212)	1789908	0.548646	196	44315	11009	9132.18	Bacteria	Firmicutes_A	Clostridia	Oscillospirales	Ruminococcaceae	Ruminococcus	Ruminococcus flavefaciens_B
MAG261	75.54	2.42	0	Medium	p__Euryarchaeota (UID3)	1187135	0.616058	141	43564	11954	8419.4	Archaea	Thermoplasmatota	Thermoplasmata	Methanomassiliicoccales	Methanomethylophilaceae	Methanomethylophilus	Methanomethylophilus sp001481295
MAG262	53.51	1.75	100	Medium	k__Bacteria (UID203)	1112365	0.467668	161	33519	8239	6909.1	Bacteria	Firmicutes_A	Clostridia	Lachnospirales	Lachnospiraceae	XBD2001	XBD2001 sp900116395
MAG263	67.69	4.21	12.5	Medium	o__Bacteroidales (UID2657)	1622462	0.451945	210	31080	9611	7726.01	Bacteria	Bacteroidota	Bacteroidia	Bacteroidales	Bacteroidaceae	UBA1786
MAG264	94.31	0.05	0	High	o__Selenomonadales (UID1024)	2195414	0.559535	67	160070	55871	32767.4	Bacteria	Firmicutes_C	Negativicutes	Acidaminococcales	Acidaminococcaceae	Acidaminococcus	Acidaminococcus sp900315205
MAG265	86.35	1.85	25	Medium	o__Clostridiales (UID1212)	2137059	0.570769	189	50634	14685	11307.2	Bacteria	Firmicutes_A	Clostridia	Oscillospirales	Ruminococcaceae	Firm-04
MAG266	60.14	4.52	19.05	Medium	o__Clostridiales (UID1212)	1536714	0.273236	171	54038	12175	8986.63	Bacteria	Firmicutes_A	Clostridia	TANB77	CAG-508	CAG-269
MAG267	85.48	2.99	10	Medium	p__Bacteroidetes (UID2605)	2520909	0.497142	213	88584	17805	11835.3	Bacteria	Bacteroidota	Bacteroidia	Bacteroidales	UBA932	RC9
MAG268	51.91	8.77	11.11	Medium	k__Bacteria (UID203)	1062718	0.387165	240	17459	4520	4427.99	Bacteria	Proteobacteria	Alphaproteobacteria	RF32	CAG-239	RUG410	RUG410 sp900313185
MAG269	62.89	0.48	100	Medium	p__Bacteroidetes (UID2605)	1049113	0.567476	182	21404	6056	5764.36	Bacteria	Bacteroidota	Bacteroidia	Bacteroidales	UBA932
MAG27	89.75	0.48	0	Medium	p__Bacteroidetes (UID2605)	1780793	0.505166	150	60681	16674	11872	Bacteria	Bacteroidota	Bacteroidia	Bacteroidales	UBA932	RC9	RC9 sp900316675
MAG270	82.89	2.87	40	Medium	f__Lachnospiraceae (UID1255)	2711848	0.472351	254	51752	13761	10676.6	Bacteria	Firmicutes_A	Clostridia	Lachnospirales	Lachnospiraceae	NK4A136
MAG271	53.45	0	0	Medium	k__Bacteria (UID203)	1757412	0.512835	256	50530	8028	6864.89	Bacteria	Spirochaetota	Spirochaetia	Treponematales	Treponemataceae	Treponema_D
MAG272	52.46	2.63	0	Medium	k__Bacteria (UID203)	1312456	0.358549	272	15601	5013	4825.21	Bacteria	Firmicutes_A	Clostridia	Lachnospirales	Lachnospiraceae	Lachnospira	Lachnospira multipara
MAG273	53.56	1.25	60	Medium	g__Prevotella (UID2722)	1066373	0.479813	124	32892	9267	8599.78	Bacteria	Bacteroidota	Bacteroidia	Bacteroidales	Bacteroidaceae	Prevotella	Prevotella sp900316295
MAG274	59.87	7.96	27.78	Medium	k__Bacteria (UID203)	1939401	0.589354	344	22595	6305	5637.79	Bacteria	Bacteroidota	Bacteroidia	Bacteroidales	UBA932	RC9
MAG275	54.03	0.48	100	Medium	f__Lachnospiraceae (UID1286)	786716	0.393489	139	32419	5960	5659.83	Bacteria	Firmicutes_A	Clostridia	Lachnospirales	Lachnospiraceae
MAG276	86.32	1.26	75	Medium	o__Rhodospirillales (UID3754)	1547782	0.544924	211	30978	9130	7335.46	Bacteria	Proteobacteria	Alphaproteobacteria	Acetobacterales	Acetobacteraceae	Acetobacter	Acetobacter pasteurianus_B
MAG277	77.04	0.16	0	Medium	p__Firmicutes (UID1022)	1203043	0.47118	169	26663	8314	7118.6	Bacteria	Firmicutes_C	Negativicutes	Veillonellales	Dialisteraceae	Allisonella	Allisonella histaminiformans
MAG278	60.46	0.69	40	Medium	f__Lachnospiraceae (UID1286)	1306615	0.441526	217	21404	6740	6021.27	Bacteria	Firmicutes_A	Clostridia	Lachnospirales	Lachnospiraceae	AC2028
MAG279	78.11	8.22	15	Medium	o__Clostridiales (UID1120)	2264522	0.450721	212	66758	14978	10681.7	Bacteria	Firmicutes_A	Clostridia	Saccharofermentanales	Saccharofermentanaceae	Saccharofermentans
MAG28	83.38	1.29	27.27	Medium	o__Bacteroidales (UID2657)	2392794	0.483269	261	41194	12276	9167.79	Bacteria	Bacteroidota	Bacteroidia	Bacteroidales	Bacteroidaceae	UBA4334	UBA4334 sp900316975
MAG280	55.33	8.62	60	Medium	k__Bacteria (UID203)	1895745	0.628772	306	34530	7117	6195.25	Bacteria	Bacteroidota	Bacteroidia	Bacteroidales	UBA932	RC9
MAG281	74.17	1.34	66.67	Medium	o__Clostridiales (UID1212)	1948605	0.464475	98	97111	26365	19883.7	Bacteria	Firmicutes_A	Clostridia	Oscillospirales	Ruminococcaceae	Ruminococcus	Ruminococcus flavefaciens_L
MAG282	59.31	1.72	100	Medium	k__Bacteria (UID203)	1210980	0.458209	183	20915	7841	6617.38	Bacteria	Firmicutes_C	Negativicutes	Selenomonadales	Selenomonadaceae	Anaerovibrio
MAG283	54.39	0	0	Medium	k__Bacteria (UID203)	1391528	0.481481	177	27509	9495	7861.74	Bacteria	Firmicutes_A	Clostridia	Oscillospirales	Ruminococcaceae	Ruminococcus_D
MAG284	51.72	0	0	Medium	k__Bacteria (UID203)	2081317	0.495865	94	88131	32194	22141.7	Bacteria	Bacteroidota	Bacteroidia	Bacteroidales	Bacteroidaceae	UBA3839
MAG285	87.21	0.5	50	Medium	o__Bacteroidales (UID2657)	2116349	0.516645	68	152970	47087	31122.8	Bacteria	Bacteroidota	Bacteroidia	Bacteroidales	Bacteroidaceae	RUG210
MAG286	51.72	5.17	0	Medium	k__Bacteria (UID203)	1296981	0.499019	182	23925	8172	7126.27	Bacteria	Bacteroidota	Bacteroidia	Bacteroidales	Bacteroidaceae	Prevotella	Prevotella sp900314915
MAG287	64.36	0	0	Medium	k__Bacteria (UID2565)	880721	0.409217	86	32596	16248	10240.9	Bacteria	Proteobacteria	Alphaproteobacteria	RF32	CAG-239	RUG410	RUG410 sp900313155
MAG288	67.98	1.12	100	Medium	k__Bacteria (UID2329)	856729	0.505173	134	24487	7995	6393.5	Bacteria	Firmicutes	Bacilli	RFN20	CAG-826	UBA733
MAG289	54.94	7.43	46.15	Medium	k__Bacteria (UID203)	1222150	0.585903	206	24688	6453	5932.77	Bacteria	Firmicutes_A	Clostridia	Lachnospirales	Lachnospiraceae	UBA6987
MAG29	93.77	0.67	100	High	o__Clostridiales (UID1212)	2117079	0.491389	114	89281	27748	18570.9	Bacteria	Firmicutes_A	Clostridia	Oscillospirales	Ruminococcaceae	Ruminococcus	Ruminococcus sp900319195
MAG290	62.76	5.26	80	Medium	k__Bacteria (UID203)	1715078	0.478463	289	22749	6707	5934.53	Bacteria	Firmicutes_A	Clostridia	Saccharofermentanales	Saccharofermentanaceae	Saccharofermentans	Saccharofermentans sp900111435
MAG291	56.08	5.26	100	Medium	k__Bacteria (UID203)	1756549	0.469265	167	50773	13375	10518.3	Bacteria	Firmicutes_A	Clostridia	Oscillospirales	Ruminococcaceae	Ruminococcus_D
MAG292	68.97	0	0	Medium	k__Bacteria (UID203)	1270655	0.45628	231	30562	5924	5500.67	Bacteria	Firmicutes_A	Clostridia	Oscillospirales	Acutalibacteraceae	UBA1213
MAG293	72.63	3.36	14.29	Medium	o__Clostridiales (UID1212)	1872215	0.655952	258	30059	9402	7256.65	Bacteria	Firmicutes_A	Clostridia	Oscillospirales	Oscillospiraceae
MAG294	67.46	2.59	50	Medium	k__Bacteria (UID203)	2484540	0.556624	474	21905	5480	5241.65	Bacteria	Firmicutes_A	Clostridia	Oscillospirales	Ruminococcaceae	Firm-04	Firm-04 sp001603005
MAG295	63.3	0.24	0	Medium	o__Clostridiales (UID1120)	709283	0.504487	115	22352	6685	6167.68	Bacteria	Firmicutes_A	Clostridia	Peptostreptococcales	Anaerovoracaceae	RUG754	RUG754 sp900315895
MAG296	74.87	6.96	26.09	Medium	f__Lachnospiraceae (UID1255)	3045192	0.443575	399	38539	9475	7632.06	Bacteria	Firmicutes_A	Clostridia	Lachnospirales	Lachnospiraceae	NK4A136	NK4A136 sp002393955
MAG297	81.21	0.5	100	Medium	o__Clostridiales (UID1212)	1700402	0.490695	198	29309	10355	8587.89	Bacteria	Firmicutes_A	Clostridia	Oscillospirales	Acutalibacteraceae	CAG-177
MAG298	81.87	2.53	60	Medium	o__Clostridiales (UID1226)	1561950	0.6301	231	32635	8391	6761.69	Bacteria	Firmicutes_A	Clostridia	Lachnospirales	Lachnospiraceae
MAG299	56.04	0	0	Medium	o__Bacteroidales (UID2657)	1697856	0.581955	148	50157	14326	11472	Bacteria	Bacteroidota	Bacteroidia	Bacteroidales	Bacteroidaceae	UBA6398	UBA6398 sp900314335
MAG3	80.62	5.19	10.71	Medium	o__Bacteroidales (UID2657)	2290172	0.443309	262	52887	11194	8741.11	Bacteria	Bacteroidota	Bacteroidia	Bacteroidales	Bacteroidaceae	Phocaeicola
MAG30	86.52	1.96	60	Medium	o__Clostridiales (UID1120)	1824303	0.508216	221	47695	10535	8254.76	Bacteria	Firmicutes_A	Clostridia	Saccharofermentanales	Saccharofermentanaceae	Saccharofermentans
MAG300	57.07	1.72	0	Medium	k__Bacteria (UID203)	2452528	0.539204	328	36005	9125	7477.22	Bacteria	Bacteroidota	Bacteroidia	Bacteroidales	Bacteroidaceae	Prevotella	Prevotella sp900317305
MAG301	50.8	1.72	0	Medium	k__Bacteria (UID203)	1036522	0.615298	208	20287	5273	4983.28	Bacteria	Firmicutes_A	Clostridia	Peptostreptococcales	Anaerovoracaceae	UBA1764
MAG302	84.39	2.83	37.5	Medium	o__Bacteroidales (UID2617)	1871752	0.564265	203	38648	11777	9220.45	Bacteria	Bacteroidota	Bacteroidia	Bacteroidales	Muribaculaceae	C941
MAG303	95.57	0.57	0	High	f__Lachnospiraceae (UID1255)	2325447	0.52866	119	124600	32147	19541.6	Bacteria	Firmicutes_A	Clostridia	Lachnospirales	Lachnospiraceae	CAG-791	CAG-791 sp900317475
MAG304	61.21	0	0	Medium	k__Bacteria (UID203)	1344803	0.523631	172	24041	9207	7818.62	Bacteria	Bacteroidota	Bacteroidia	Bacteroidales	Bacteroidaceae	UBA4372
MAG305	65.06	5.62	25	Medium	k__Bacteria (UID203)	1118153	0.268606	115	46430	13233	9723.07	Bacteria	Firmicutes_A	Clostridia	TANB77	CAG-508	CAG-269	CAG-269 sp001916005
MAG306	94.4	4.65	12.5	High	o__Clostridiales (UID1212)	2104984	0.577223	218	42779	13093	9655.89	Bacteria	Firmicutes_A	Clostridia	Lachnospirales	Lachnospiraceae
MAG307	85.35	1.72	33.33	Medium	f__Lachnospiraceae (UID1255)	1935837	0.527629	191	67976	14586	10135.3	Bacteria	Firmicutes_A	Clostridia	Lachnospirales	Lachnospiraceae	CAG-791	CAG-791 sp900317555
MAG308	84.64	0.79	50	Medium	f__Lachnospiraceae (UID1286)	1947761	0.462255	193	63475	12392	10092	Bacteria	Firmicutes_A	Clostridia	Lachnospirales	Lachnospiraceae
MAG309	80.74	0.88	66.67	Medium	o__Bacteroidales (UID2617)	1426752	0.458115	130	42169	14315	10975	Bacteria	Bacteroidota	Bacteroidia	Bacteroidales	Paludibacteraceae	RF16
MAG31	97.97	0.68	50	High	g__Prevotella (UID2724)	2871635	0.384869	155	183293	40608	18526.7	Bacteria	Bacteroidota	Bacteroidia	Bacteroidales	Bacteroidaceae	Prevotella	Prevotella bryantii
MAG310	87.28	0	0	Medium	o__Clostridiales (UID1212)	1709268	0.467581	184	52390	11462	9289.5	Bacteria	Firmicutes_A	Clostridia	Oscillospirales	Acutalibacteraceae	Eubacterium_R
MAG311	52.59	3.45	50	Medium	k__Bacteria (UID203)	1888673	0.529659	191	38262	12455	9888.34	Bacteria	Bacteroidota	Bacteroidia	Bacteroidales	P3	UBA1711	UBA1711 sp002368955
MAG312	76.42	0.67	100	Medium	o__Clostridiales (UID1212)	1747959	0.365596	236	36628	9371	7406.61	Bacteria	Firmicutes_A	Clostridia	Lachnospirales	Lachnospiraceae	CAG-127
MAG313	85.37	0.33	66.67	Medium	f__Lachnospiraceae (UID1286)	2003603	0.44604	99	138353	35083	20238.4	Bacteria	Firmicutes_A	Clostridia	Lachnospirales	Lachnospiraceae	FD2005
MAG314	54.25	1.9	50	Medium	p__Bacteroidetes (UID2605)	1333923	0.517348	225	25809	6537	5928.55	Bacteria	Bacteroidota	Bacteroidia	Bacteroidales	UBA932	RC9
MAG315	50.54	0	0	Medium	o__Clostridiales (UID1212)	1646565	0.362841	328	26951	5385	5020.02	Bacteria	Firmicutes_A	Clostridia	Lachnospirales	Lachnospiraceae	TF01-11	TF01-11 sp000436755
MAG316	62.23	0	0	Medium	k__Bacteria (UID203)	1789378	0.55847	239	38241	9336	7486.94	Bacteria	Bacteroidota	Bacteroidia	Bacteroidales	Bacteroidaceae	UBA4372	UBA4372 sp900320715
MAG317	51.03	3.45	33.33	Medium	k__Bacteria (UID203)	1719483	0.500448	132	51771	23477	13026.4	Bacteria	Bacteroidota	Bacteroidia	Bacteroidales	Bacteroidaceae	Prevotella
MAG318	91.67	1.34	0	High	o__Clostridiales (UID1212)	2392204	0.622222	158	65383	22365	15140.5	Bacteria	Firmicutes_A	Clostridia_A	Christensenellales	UMGS416
MAG319	66.35	0.22	0	Medium	o__Clostridiales (UID1212)	1501745	0.514848	235	26425	7104	6390.4	Bacteria	Firmicutes_A	Clostridia	Lachnospirales	Lachnospiraceae	Eubacterium_F
MAG32	98.15	2.27	28.57	High	f__Lachnospiraceae (UID1286)	2814883	0.439976	173	94581	26601	16271	Bacteria	Firmicutes_A	Clostridia	Lachnospirales	Lachnospiraceae	Agathobacter	Agathobacter faecis
MAG320	55.07	0.08	0	Medium	f__Veillonellaceae (UID1032)	1190208	0.631137	121	52650	13164	9836.43	Bacteria	Firmicutes_C	Negativicutes	Selenomonadales	Selenomonadaceae	Selenomonas_C	Selenomonas_C sp002351185
MAG321	73.68	1.6	50	Medium	o__Bacteroidales (UID2657)	1723963	0.43648	214	48535	9934	8055.9	Bacteria	Bacteroidota	Bacteroidia	Bacteroidales	Bacteroidaceae	Phocaeicola
MAG322	89.42	0.79	50	Medium	o__Clostridiales (UID1226)	2149288	0.454826	149	64466	23705	14424.8	Bacteria	Firmicutes_A	Clostridia	Lachnospirales	Lachnospiraceae	Oribacterium	Oribacterium sp900318695
MAG323	62.57	0	0	Medium	k__Bacteria (UID203)	937945	0.459479	143	25888	7132	6559.06	Bacteria	Firmicutes_A	Clostridia	Peptostreptococcales	Anaerovoracaceae	RUG754
MAG324	67.24	1.72	100	Medium	k__Bacteria (UID203)	2044483	0.570164	297	27529	8000	6883.78	Bacteria	Bacteroidota	Bacteroidia	Bacteroidales	Bacteroidaceae	UBA4372
MAG325	57.89	0	0	Medium	k__Bacteria (UID203)	1007116	0.40532	166	30192	6905	6066.96	Bacteria	Firmicutes	Bacilli	RFN20	CAG-288	UBA7642	UBA7642 sp900313465
MAG326	60.34	0	0	Medium	k__Bacteria (UID203)	971751	0.586158	160	38399	6996	6073.44	Bacteria	Firmicutes_A	Clostridia	Oscillospirales	Acutalibacteraceae	RUG420	RUG420 sp900317085
MAG327	70.18	2.28	11.11	Medium	o__Clostridiales (UID1212)	1285858	0.258119	95	54285	19556	13535.3	Bacteria	Firmicutes_A	Clostridia	TANB77	CAG-508
MAG328	65.67	1.72	100	Medium	k__Bacteria (UID203)	2648550	0.457222	300	61407	10451	8828.5	Bacteria	Firmicutes_A	Clostridia	Oscillospirales	Ruminococcaceae	Ruminococcus
MAG329	50.58	0	0	Medium	o__Clostridiales (UID1212)	711761	0.379025	135	15907	5658	5272.3	Bacteria	Firmicutes_A	Clostridia	Oscillospirales	Acutalibacteraceae	UBA737	UBA737 sp002371985
MAG33	91.16	1.5	100	High	o__Clostridiales (UID1212)	1771563	0.605141	197	41593	11680	8992.71	Bacteria	Firmicutes_A	Clostridia	Oscillospirales	Oscillospiraceae	CAG-83
MAG330	96.5	0.06	100	High	o__Clostridiales (UID1226)	2439078	0.521886	68	153877	55455	35868.8	Bacteria	Firmicutes_A	Clostridia	Lachnospirales	Lachnospiraceae	Eubacterium_H	Eubacterium_H sp900318405
MAG331	62.71	0	0	Medium	k__Bacteria (UID203)	1317333	0.492493	176	48720	9242	7484.85	Bacteria	Bacteroidota	Bacteroidia	Bacteroidales	UBA932	UBA1232
MAG332	56.18	0	0	Medium	k__Bacteria (UID2569)	1039385	0.460398	29	205934	56544	35840.9	Bacteria	Bacteroidota	Bacteroidia	Bacteroidales	Paludibacteraceae	UBA4363	UBA4363 sp002393965
MAG333	64.51	0.67	0	Medium	o__Clostridiales (UID1212)	1905370	0.624745	390	22005	5178	4885.56	Bacteria	Firmicutes_A	Clostridia	Oscillospirales	CAG-272	UMGS1696
MAG334	82.96	2.68	60	Medium	o__Clostridiales (UID1212)	2260038	0.460857	225	63867	13051	10044.6	Bacteria	Firmicutes_A	Clostridia	Oscillospirales	Ruminococcaceae	Ruminococcus	Ruminococcus flavefaciens_H
MAG335	61.21	3.45	0	Medium	k__Bacteria (UID203)	2148221	0.586216	162	98538	18964	13260.6	Bacteria	Bacteroidota	Bacteroidia	Bacteroidales	UBA932	RC9
MAG336	60	6.03	25	Medium	k__Bacteria (UID203)	1099758	0.643393	244	13883	4910	4507.2	Bacteria	Verrucomicrobiota	Kiritimatiellae	RFP12	UBA1067	UBA1067
MAG337	65.27	1.43	33.33	Medium	p__Bacteroidetes (UID2605)	1365217	0.578166	167	35398	10251	8174.95	Bacteria	Bacteroidota	Bacteroidia	Bacteroidales	UBA932	RC9
MAG338	50.86	0	0	Medium	k__Bacteria (UID203)	1109144	0.525335	157	27366	7767	7064.61	Bacteria	Bacteroidota	Bacteroidia	Bacteroidales	Muribaculaceae	C941	C941 sp900318065
MAG339	90.86	0.89	50	High	o__Clostridiales (UID1120)	1981998	0.491419	172	40456	16203	11523.2	Bacteria	Firmicutes_A	Clostridia	Saccharofermentanales	Saccharofermentanaceae	Saccharofermentans
MAG34	86.71	2.53	75	Medium	p__Firmicutes (UID1022)	1603051	0.471615	111	101137	21397	14441.9	Bacteria	Firmicutes_C	Negativicutes	Selenomonadales	Selenomonadaceae	RUG114	RUG114 sp900315615
MAG340	69.05	5.37	16.67	Medium	o__Clostridiales (UID1212)	1731876	0.613344	267	23845	7608	6486.43	Bacteria	Firmicutes_A	Clostridia	Oscillospirales	Oscillospiraceae	UBA1774
MAG341	68.65	4.29	25	Medium	p__Bacteroidetes (UID2605)	1557343	0.573486	206	32494	8465	7559.92	Bacteria	Bacteroidota	Bacteroidia	Bacteroidales	UBA932	RC9	RC9 sp900320185
MAG342	68.92	0.22	50	Medium	f__Lachnospiraceae (UID1286)	1533377	0.460042	191	37999	10239	8028.15	Bacteria	Firmicutes_A	Clostridia	Lachnospirales	Lachnospiraceae	UBA3766
MAG343	50.3	1.08	75	Medium	k__Bacteria (UID2569)	1089944	0.547815	148	24352	8781	7364.49	Bacteria	Bacteroidota	Bacteroidia	Bacteroidales	P3	UBA1217	UBA1217 sp002371315
MAG344	56.9	0	0	Medium	k__Bacteria (UID203)	822590	0.55875	69	50477	17258	11921.6	Bacteria	Firmicutes_C	Negativicutes	Veillonellales	Megasphaeraceae	Megasphaera	Megasphaera elsdenii
MAG345	63.82	1.08	51.43	Medium	p__Bacteroidetes (UID2605)	1453940	0.523687	211	32955	8337	6890.71	Bacteria	Bacteroidota	Bacteroidia	Bacteroidales	UBA932	RC9
MAG346	71.57	0.89	0	Medium	o__Clostridiales (UID1212)	1490598	0.545645	198	54544	8864	7528.27	Bacteria	Firmicutes_A	Clostridia	Lachnospirales	UBA1390	RUG760	RUG760 sp900322165
MAG347	81.13	4.1	0	Medium	o__Bacteroidales (UID2657)	2441236	0.513758	199	72014	14289	12267.5	Bacteria	Bacteroidota	Bacteroidia	Bacteroidales	Bacteroidaceae	UBA1786
MAG348	60.82	0	0	Medium	k__Bacteria (UID203)	1696240	0.586128	155	69620	14982	10943.5	Bacteria	Bacteroidota	Bacteroidia	Bacteroidales	P3	UBA1711	UBA1711 sp900314925
MAG349	52.59	7.76	100	Medium	k__Bacteria (UID203)	951527	0.585565	184	17649	5684	5171.34	Bacteria	Firmicutes_A	Clostridia	Lachnospirales	Lachnospiraceae
MAG35	85.34	1.68	77.78	Medium	o__Bacteroidales (UID2716)	2388937	0.475905	279	36009	10470	8562.5	Bacteria	Bacteroidota	Bacteroidia	Bacteroidales	Bacteroidaceae	Prevotella
MAG350	50.87	0	0	Medium	k__Bacteria (UID1452)	614794	0.4549	62	35351	11226	9916.03	Bacteria	Patescibacteria	Saccharimonadia	Saccharimonadales	Saccharimonadaceae	UBA2834
MAG351	56.36	0	0	Medium	k__Bacteria (UID203)	1123425	0.372368	67	123868	37147	16767.5	Bacteria	Spirochaetota	Spirochaetia	Treponematales	Treponemataceae	Treponema_D	Treponema_D sp002394685
MAG352	74.71	0.36	0	Medium	o__Clostridiales (UID1212)	1363433	0.610816	88	79202	23880	15493.6	Bacteria	Firmicutes_A	Clostridia	Oscillospirales	Butyricicoccaceae	UBA4644
MAG353	65.45	1.82	0	Medium	k__Bacteria (UID203)	1738906	0.465708	260	29719	7898	6688.1	Bacteria	Spirochaetota	Spirochaetia	Treponematales	Treponemataceae	Treponema_D	Treponema_D sp002369025
MAG354	63.22	0	0	Medium	k__Bacteria (UID2565)	2809954	0.563083	198	89063	21043	14191.7	Bacteria	Planctomycetota	Planctomycetes	Pirellulales	Thermoguttaceae	RUG369
MAG355	84.09	3.35	30	Medium	f__Lachnospiraceae (UID1255)	2144898	0.441809	249	59781	10475	8614.05	Bacteria	Firmicutes_A	Clostridia	Lachnospirales	Lachnospiraceae	NK4A136	NK4A136 sp000421045
MAG356	77.07	2.35	20	Medium	o__Clostridiales (UID1212)	1907178	0.398899	202	49885	12098	9441.48	Bacteria	Firmicutes_A	Clostridia	Lachnospirales	Lachnospiraceae	Eubacterium_Q
MAG357	73.62	7.76	50	Medium	k__Bacteria (UID203)	2166448	0.575767	284	43433	8927	7628.34	Bacteria	Firmicutes_A	Clostridia	Oscillospirales	Ruminococcaceae	Firm-04
MAG358	96.91	3.37	0	High	k__Bacteria (UID2329)	1337691	0.329227	56	119604	35891	23887.3	Bacteria	Firmicutes	Bacilli	RFN20	CAG-288	UBA6879
MAG359	88.92	1.34	0	Medium	o__Clostridiales (UID1212)	1523036	0.559149	184	35848	9852	8277.37	Bacteria	Firmicutes_A	Clostridia	Oscillospirales	Oscillospiraceae	NK3B98
MAG36	84.61	0	0	Medium	o__Clostridiales (UID1212)	1662106	0.415257	193	53402	10834	8611.95	Bacteria	Firmicutes_A	Clostridia	Oscillospirales	Acutalibacteraceae	Ruminococcus_E
MAG360	60.75	0.02	50	Medium	o__Bacteroidales (UID2617)	1435830	0.527559	126	58199	14624	11395.5	Bacteria	Bacteroidota	Bacteroidia	Bacteroidales	Muribaculaceae
MAG361	66.17	0.21	50	Medium	f__Lachnospiraceae (UID1255)	1553942	0.444187	122	95991	18720	12737.2	Bacteria	Firmicutes_A	Clostridia	Lachnospirales	Lachnospiraceae	NK4A136	NK4A136 sp900102065
MAG362	59.14	3.45	0	Medium	k__Bacteria (UID203)	1893007	0.528308	75	110745	40953	25240.1	Bacteria	Bacteroidota	Bacteroidia	Bacteroidales	Bacteroidaceae	Prevotella	Prevotella sp900319905
MAG363	58.73	0	0	Medium	f__Spirochaetaceae (UID2535)	1166459	0.439921	232	14657	5339	5027.84	Bacteria	Spirochaetota	Spirochaetia	Treponematales	Treponemataceae	Treponema_D	Treponema_D sp003447785
MAG364	88.25	3.69	16.67	Medium	o__Clostridiales (UID1212)	2310948	0.423907	159	86453	21880	14534.3	Bacteria	Firmicutes_A	Clostridia	Lachnospirales	Lachnospiraceae	Eubacterium_Q	Eubacterium_Q sp900321215
MAG365	61.79	6.69	53.85	Medium	o__Bacteroidales (UID2657)	1188017	0.486357	149	33511	9160	7973.27	Bacteria	Bacteroidota	Bacteroidia	Bacteroidales	Bacteroidaceae	UBA4372	UBA4372 sp002450165
MAG366	58.81	2.82	33.33	Medium	o__Clostridiales (UID1212)	1642787	0.430005	264	32398	6829	6222.68	Bacteria	Firmicutes_A	Clostridia	Lachnospirales	Lachnospiraceae	Eubacterium_Q
MAG367	85.94	2.38	20	Medium	p__Bacteroidetes (UID2605)	2302097	0.543513	171	78488	18589	13462.6	Bacteria	Bacteroidota	Bacteroidia	Bacteroidales	UBA932	RC9
MAG368	53.59	0.95	0	Medium	k__Bacteria (UID2372)	772030	0.461398	101	35027	9613	7643.86	Bacteria	Firmicutes	Bacilli	Erysipelotrichales	Erysipelotrichaceae	UBA636	UBA636 sp900321955
MAG369	62.28	0	0	Medium	k__Bacteria (UID203)	1238776	0.328264	198	34811	7168	6256.44	Bacteria	Firmicutes	Bacilli	Acholeplasmatales	Anaeroplasmataceae	Anaeroplasma
MAG37	95	0.95	0	High	p__Bacteroidetes (UID2605)	2552820	0.491973	125	137033	28457	20422.6	Bacteria	Bacteroidota	Bacteroidia	Bacteroidales	UBA932	RC9	RC9 sp900316045
MAG370	88.88	0.05	100	Medium	f__Lachnospiraceae (UID1286)	2070655	0.476504	146	92626	19016	14182.6	Bacteria	Firmicutes_A	Clostridia	Lachnospirales	Lachnospiraceae	Weimerbacter
MAG371	66.88	0.67	100	Medium	o__Clostridiales (UID1212)	1567622	0.457598	113	57396	16995	13872.8	Bacteria	Firmicutes_A	Clostridia	Oscillospirales	Ruminococcaceae	Ruminococcus	Ruminococcus sp900315975
MAG372	64.45	1.81	25	Medium	o__Bacteroidales (UID2657)	2022258	0.442554	290	28334	8222	6973.3	Bacteria	Bacteroidota	Bacteroidia	Bacteroidales	Bacteroidaceae	UBA2918
MAG373	57.75	0.87	0	Medium	o__Bacteroidales (UID2657)	1673843	0.464787	150	33206	15026	11159	Bacteria	Bacteroidota	Bacteroidia	Bacteroidales	Bacteroidaceae	UBA4334
MAG374	80.15	1.64	33.33	Medium	c__Clostridia (UID1118)	1635604	0.582386	89	125226	25251	18377.6	Bacteria	Firmicutes_A	Clostridia_A	Christensenellales	CAG-138	UBA3857
MAG375	70.63	7.87	12.5	Medium	k__Bacteria (UID2329)	833000	0.347858	94	71335	11078	8861.7	Bacteria	Firmicutes	Bacilli	RFN20	CAG-826	UBA3207
MAG376	51.04	3.51	0	Medium	k__Bacteria (UID203)	1170331	0.590789	219	24445	5713	5343.98	Bacteria	Desulfobacterota	Desulfovibrionia	Desulfovibrionales	Desulfovibrionaceae	Desulfovibrio	Desulfovibrio sp900319575
MAG377	97.92	0.67	0	High	o__Clostridiales (UID1212)	1997491	0.508846	42	274521	74205	47559.3	Bacteria	Firmicutes_A	Clostridia	Oscillospirales	Acutalibacteraceae	UBA1213
MAG378	55.06	0	0	Medium	k__Bacteria (UID203)	1410940	0.396263	279	19770	5366	5057.13	Bacteria	Firmicutes_A	Clostridia	Lachnospirales	Lachnospiraceae	UBA3766	UBA3766 sp002369155
MAG379	76.05	2.44	60	Medium	p__Bacteroidetes (UID2605)	1820425	0.522638	216	47890	9804	8427.89	Bacteria	Bacteroidota	Bacteroidia	Bacteroidales	UBA932	RC9	RC9 sp900320965
MAG38	80.68	3.66	20	Medium	o__Clostridiales (UID1212)	1738048	0.617473	268	29190	7774	6485.25	Bacteria	Firmicutes_A	Clostridia	Oscillospirales	Oscillospiraceae	CAG-110	CAG-110 sp900315595
MAG380	55.62	0.56	0	Medium	k__Bacteria (UID2329)	543204	0.257325	118	17995	4897	4603.42	Bacteria	Firmicutes	Bacilli	RF39	CAG-1000
MAG381	51.03	0	0	Medium	k__Bacteria (UID203)	1297048	0.47627	202	19967	7154	6421.03	Bacteria	Firmicutes_A	Clostridia	Oscillospirales	Acutalibacteraceae	Ruminococcus_E	Ruminococcus_E sp900315605
MAG382	63.17	2.1	66.67	Medium	f__Spirochaetaceae (UID2535)	1299075	0.46606	245	19834	5557	5302.35	Bacteria	Spirochaetota	Spirochaetia	Treponematales	Treponemataceae	Treponema_D	Treponema_D sp002369025
MAG383	78.42	3.51	0	Medium	k__Bacteria (UID203)	2142326	0.284124	216	55783	17586	9918.18	Bacteria	Firmicutes	Bacilli	RF39	CAG-611	UBA3789
MAG384	53.92	0	0	Medium	k__Bacteria (UID203)	1345860	0.575893	181	22825	9262	7435.69	Bacteria	Bacteroidota	Bacteroidia	Bacteroidales	UBA932	RC9	RC9 sp900320185
MAG385	50.82	0.95	100	Medium	p__Bacteroidetes (UID2605)	999720	0.52506	160	22375	6998	6248.25	Bacteria	Bacteroidota	Bacteroidia	Bacteroidales	UBA932	RC9
MAG386	91.84	1.21	33.33	High	f__Lachnospiraceae (UID1286)	1971954	0.443914	179	56456	15432	11016.5	Bacteria	Firmicutes_A	Clostridia	Lachnospirales	Lachnospiraceae	Agathobacter	Agathobacter ruminis
MAG387	65.01	0.7	0	Medium	f__Spirochaetaceae (UID2535)	1643695	0.47814	212	31546	9732	7753.28	Bacteria	Spirochaetota	Spirochaetia	Treponematales	Treponemataceae	Treponema_D
MAG388	70.18	7.59	13.33	Medium	o__Clostridiales (UID1212)	1619673	0.655795	229	27395	8834	7072.81	Bacteria	Firmicutes_A	Clostridia	Oscillospirales	Oscillospiraceae
MAG389	74.31	0.86	0	Medium	k__Bacteria (UID203)	3020370	0.454334	191	91626	29733	15813.5	Bacteria	Bacteroidota	Bacteroidia	Bacteroidales	Bacteroidaceae	Prevotella
MAG39	86.94	2.04	57.14	Medium	o__Bacteroidales (UID2716)	1702486	0.480502	185	35352	10662	9202.63	Bacteria	Bacteroidota	Bacteroidia	Bacteroidales	Bacteroidaceae	Prevotella	Prevotella sp900315775
MAG390	50	0	0	Medium	k__Bacteria (UID203)	1187877	0.521275	162	30172	8785	7332.57	Bacteria	Bacteroidota	Bacteroidia	Bacteroidales	UBA932	RC9	RC9 sp900320965
MAG391	66.32	5.26	25	Medium	k__Bacteria (UID203)	1920821	0.545603	293	33652	7430	6555.7	Bacteria	Firmicutes_A	Clostridia	Lachnospirales	Lachnospiraceae
MAG392	57.72	2.42	75	Medium	c__Clostridia (UID1118)	958625	0.444423	118	31866	10507	8123.94	Bacteria	Firmicutes_A	Clostridia_A	Christensenellales	Christensenellaceae	QANA01
MAG393	50	1.72	0	Medium	k__Bacteria (UID203)	708733	0.464068	76	44014	13933	9325.43	Bacteria	Firmicutes	Bacilli	Erysipelotrichales	Erysipelotrichaceae	UBA636	UBA636 sp900321955
MAG394	68.97	0	0	Medium	k__Bacteria (UID203)	1642134	0.522421	134	49251	16524	12254.7	Bacteria	Bacteroidota	Bacteroidia	Bacteroidales	Bacteroidaceae	Prevotella	Prevotella sp900313805
MAG395	81.13	0.94	0	Medium	k__Bacteria (UID2372)	1240506	0.463874	86	56514	20561	14424.5	Bacteria	Firmicutes	Bacilli	Erysipelotrichales	Erysipelotrichaceae	UBA1783
MAG396	63.79	3.45	66.67	Medium	k__Bacteria (UID203)	2163519	0.584461	141	72255	24831	15344.1	Bacteria	Bacteroidota	Bacteroidia	Bacteroidales	UBA932	RC9
MAG397	85.57	1.9	25	Medium	o__Clostridiales (UID1212)	2033415	0.487871	254	43399	9572	8005.57	Bacteria	Firmicutes_A	Clostridia	Lachnospirales	UBA1390
MAG398	69.54	1.75	33.33	Medium	o__Clostridiales (UID1120)	1098310	0.276071	106	69185	15385	10361.4	Bacteria	Firmicutes_A	Clostridia	TANB77	CAG-508	CAG-269
MAG399	52.8	4.67	33.33	Medium	k__Archaea (UID2)	1833401	0.328281	357	27891	5631	5135.58	Archaea	Euryarchaeota	Methanobacteria	Methanobacteriales	Methanobacteriaceae	Methanobrevibacter_A
MAG4	90.25	2.16	33.33	High	p__Bacteroidetes (UID2605)	2140810	0.522334	226	41657	12202	9472.61	Bacteria	Bacteroidota	Bacteroidia	Bacteroidales	UBA932	RC9
MAG40	98.15	2.07	55.56	High	o__Bacteroidales (UID2716)	2970609	0.479523	109	111905	37752	27253.3	Bacteria	Bacteroidota	Bacteroidia	Bacteroidales	Bacteroidaceae	Prevotella	Prevotella sp900314755
MAG400	73.15	1.34	0	Medium	o__Clostridiales (UID1212)	1404700	0.507987	74	56202	26035	18982.4	Bacteria	Firmicutes_A	Clostridia	Oscillospirales	Acutalibacteraceae	RUG612	RUG612 sp900320605
MAG401	80.72	7.36	7.14	Medium	k__Bacteria (UID2982)	1918349	0.639786	177	72990	16186	10838.1	Bacteria	Verrucomicrobiota	Kiritimatiellae	RFP12	UBA1067	UBA1067
MAG402	55.84	0.63	100	Medium	o__Clostridiales (UID1226)	870456	0.323124	125	27332	8314	6963.65	Bacteria	Firmicutes_A	Clostridia	Lachnospirales	Lachnospiraceae	UBA3633
MAG403	54.23	3.45	33.33	Medium	k__Bacteria (UID203)	1600405	0.547375	232	26147	8526	6898.3	Bacteria	Bacteroidota	Bacteroidia	Bacteroidales	UBA932	RC9
MAG404	85.19	0.67	0	Medium	o__Clostridiales (UID1212)	1710129	0.565873	96	86376	27169	17813.8	Bacteria	Firmicutes_A	Clostridia	Lachnospirales	Lachnospiraceae	UBA6987
MAG405	52.23	3.45	50	Medium	k__Bacteria (UID203)	1854889	0.561817	391	17456	4937	4743.96	Bacteria	Firmicutes_A	Clostridia	Oscillospirales	Ruminococcaceae	Firm-04	Firm-04 sp001603005
MAG406	59.25	3.45	0	Medium	k__Bacteria (UID203)	1164190	0.521928	163	29567	8391	7142.27	Bacteria	Firmicutes_A	Clostridia	Oscillospirales	Acutalibacteraceae	Ruminococcus_E	Ruminococcus_E sp900317875
MAG407	76.51	0.48	0	Medium	p__Bacteroidetes (UID2605)	1422981	0.507501	120	49243	14708	11858.2	Bacteria	Bacteroidota	Bacteroidia	Bacteroidales	UBA932	RC9	RC9 sp900316675
MAG408	56.03	0	0	Medium	k__Bacteria (UID203)	2066159	0.392185	192	80907	16615	10761.2	Bacteria	Bacteroidota	Bacteroidia	Bacteroidales	Bacteroidaceae	UBA4293	UBA4293 sp900316585
MAG409	61.92	5.57	20.51	Medium	o__Clostridiales (UID1120)	1651783	0.308418	174	61417	15469	9493.01	Bacteria	Firmicutes_A	Clostridia	TANB77	CAG-508
MAG41	98.66	1.34	0	High	o__Clostridiales (UID1212)	2158276	0.341658	76	208810	61016	28398.4	Bacteria	Firmicutes_A	Clostridia	Lachnospirales	Lachnospiraceae	CAG-603	CAG-603 sp900314525
MAG410	52.59	0	0	Medium	k__Bacteria (UID203)	936115	0.573415	169	21091	6036	5539.14	Bacteria	Firmicutes_A	Clostridia	Peptostreptococcales	Anaerovoracaceae	UBA1764
MAG411	85.33	1.33	100	Medium	k__Bacteria (UID2328)	1321344	0.284734	102	54205	18220	12954.4	Bacteria	Firmicutes	Bacilli	Acholeplasmatales	Anaeroplasmataceae
MAG412	66.08	0.48	0	Medium	p__Bacteroidetes (UID2605)	1235529	0.545205	168	28006	8974	7354.34	Bacteria	Bacteroidota	Bacteroidia	Bacteroidales	UBA932	RC9
MAG413	72.73	8.62	20	Medium	k__Bacteria (UID203)	2524208	0.571915	235	73199	15877	10741.3	Bacteria	Bacteroidota	Bacteroidia	Bacteroidales	UBA932	RC9
MAG414	86.03	0.34	100	Medium	o__Clostridiales (UID1212)	2230919	0.492671	139	77878	24289	16049.8	Bacteria	Firmicutes_A	Clostridia	Oscillospirales	Ruminococcaceae	Ruminococcus	Ruminococcus sp003488415
MAG415	73.16	3.51	50	Medium	k__Bacteria (UID203)	1995579	0.46256	208	41678	11576	9594.13	Bacteria	Firmicutes_A	Clostridia	Oscillospirales	Ruminococcaceae	Ruminococcus_D	Ruminococcus_D albus_A
MAG416	56.03	0	0	Medium	k__Bacteria (UID203)	721421	0.381662	127	21344	6591	5680.48	Bacteria	Firmicutes_A	Clostridia	Oscillospirales	Acutalibacteraceae	UBA737	UBA737 sp002371985
MAG417	76.36	1.12	0	Medium	k__Bacteria (UID2329)	912656	0.491095	95	53162	11626	9606.91	Bacteria	Firmicutes	Bacilli	RFN20	CAG-826	UBA733	UBA733 sp900316365
MAG418	92.62	2.01	0	High	o__Clostridiales (UID1212)	2071839	0.344365	169	96134	18992	12259.4	Bacteria	Firmicutes_A	Clostridia	Lachnospirales	Lachnospiraceae	CAG-603	CAG-603 sp900315425
MAG419	62.93	8.62	16.67	Medium	k__Bacteria (UID203)	1978547	0.539167	197	42566	12867	10043.4	Bacteria	Bacteroidota	Bacteroidia	Bacteroidales	Bacteroidaceae	Prevotella
MAG42	87.99	2.42	60	Medium	k__Bacteria (UID2569)	2174190	0.534422	166	62662	19472	13097.5	Bacteria	Bacteroidota	Bacteroidia	Bacteroidales	P3
MAG420	50.57	5.17	0	Medium	k__Bacteria (UID203)	1098542	0.656259	205	27664	5938	5358.74	Bacteria	Firmicutes_A	Clostridia	Oscillospirales	Oscillospiraceae
MAG421	84.77	6.48	28.57	Medium	o__Clostridiales (UID1212)	2299838	0.417302	289	43682	10051	7957.92	Bacteria	Firmicutes_A	Clostridia	Lachnospirales	Lachnospiraceae	Eubacterium_Q	Eubacterium_Q sp900316715
MAG422	90.44	0.37	100	High	f__Spirochaetaceae (UID2535)	1944372	0.445593	107	95581	25322	18171.7	Bacteria	Spirochaetota	Spirochaetia	Treponematales	Treponemataceae	Treponema_D
MAG423	87.32	0.67	100	Medium	o__Clostridiales (UID1212)	1825918	0.361569	162	57743	16558	11271.1	Bacteria	Firmicutes_A	Clostridia	Lachnospirales	Lachnospiraceae	Eubacterium_Q
MAG424	70.22	5.37	3.23	Medium	o__Clostridiales (UID1212)	1604654	0.35859	220	35524	9486	7293.88	Bacteria	Firmicutes_A	Clostridia	Lachnospirales	Lachnospiraceae	Eubacterium_Q	Eubacterium_Q sp002371025
MAG425	60.85	0.14	100	Medium	k__Bacteria (UID2982)	1378047	0.595029	231	24563	6805	5965.57	Bacteria	Verrucomicrobiota	Kiritimatiellae	RFP12	UBA1067	UBA1067
MAG426	54.98	1.34	0	Medium	o__Clostridiales (UID1212)	1301022	0.618453	204	35289	7366	6377.56	Bacteria	Firmicutes_A	Clostridia	Oscillospirales	Oscillospiraceae	UBA1774
MAG427	63.09	0.62	37.5	Medium	f__Mycoplasmataceae (UID2414)	289711	0.284822	58	15471	4929	4995.02	Bacteria	Firmicutes	Bacilli	Mycoplasmatales	Mycoplasmoidaceae	Malacoplasma_A
MAG428	75.59	3.76	7.14	Medium	p__Bacteroidetes (UID2605)	1697685	0.616134	218	53278	9541	7787.55	Bacteria	Bacteroidota	Bacteroidia	Bacteroidales	UBA932	RC9
MAG429	59.65	0	0	Medium	k__Bacteria (UID203)	1212917	0.41942	187	30800	7364	6486.19	Bacteria	Firmicutes_A	Clostridia	Lachnospirales	Lachnospiraceae	XBD2001
MAG43	81.72	0.87	100	Medium	p__Bacteroidetes (UID2605)	1984749	0.573034	233	43606	12319	8518.24	Bacteria	Bacteroidota	Bacteroidia	Bacteroidales	UBA932	RC9	RC9 sp900320185
MAG430	53.92	1.43	66.67	Medium	p__Bacteroidetes (UID2605)	1093867	0.597636	153	39746	8537	7149.46	Bacteria	Bacteroidota	Bacteroidia	Bacteroidales	UBA932	RC9
MAG431	92.31	1.4	50	High	f__Spirochaetaceae (UID2535)	2502212	0.381918	213	62688	17162	11747.5	Bacteria	Spirochaetota	Spirochaetia	Treponematales	Treponemataceae	Treponema_D	Treponema_D sp002394685
MAG432	50	6.9	50	Medium	k__Bacteria (UID203)	1844578	0.493597	226	39915	9621	8161.85	Bacteria	Bacteroidota	Bacteroidia	Bacteroidales	Bacteroidaceae	Prevotella
MAG44	95.64	0	0	High	o__Clostridiales (UID1212)	2190367	0.488139	76	181884	47390	28820.6	Bacteria	Firmicutes_A	Clostridia	Oscillospirales	Acutalibacteraceae	UBA1213
MAG45	86.61	9.33	26.92	Medium	p__Bacteroidetes (UID2605)	2470745	0.578817	300	52454	10551	8235.82	Bacteria	Bacteroidota	Bacteroidia	Bacteroidales	UBA932	RC9
MAG46	97.58	0	0	High	k__Bacteria (UID2569)	2009379	0.336838	34	306667	79408	59099.4	Bacteria	Bacteroidota	Bacteroidia	Bacteroidales	P3	Phil12	Phil12 sp900314725
MAG47	92.06	1.76	66.67	High	o__Bacteroidales (UID2716)	3389531	0.498914	107	187574	64710	31677.9	Bacteria	Bacteroidota	Bacteroidia	Bacteroidales	Bacteroidaceae	Prevotella	Prevotella sp900314655
MAG48	88.65	2.35	66.67	Medium	p__Bacteroidetes (UID2605)	1946743	0.565982	121	88803	23529	16088.8	Bacteria	Bacteroidota	Bacteroidia	Bacteroidales	UBA932	RC9	RC9 sp900320385
MAG49	86.81	1.23	33.33	Medium	o__Bacteroidales (UID2716)	2404079	0.519592	84	129083	46609	28620	Bacteria	Bacteroidota	Bacteroidia	Bacteroidales	Bacteroidaceae	Prevotella
MAG5	95.01	2.42	50	High	o__Bacteroidales (UID2657)	2724892	0.550169	93	186497	45509	29299.9	Bacteria	Bacteroidota	Bacteroidia	Bacteroidales	Bacteroidaceae	UBA3839	UBA3839 sp900321835
MAG50	92.04	2.4	80	High	o__Clostridiales (UID1212)	2048044	0.604919	253	72097	9237	8095.04	Bacteria	Firmicutes_A	Clostridia	Oscillospirales	Oscillospiraceae	CAG-110
MAG51	91.42	0.46	66.67	High	o__Clostridiales (UID1212)	2743487	0.356157	236	53108	15993	11624.9	Bacteria	Firmicutes_A	Clostridia	Lachnospirales	Lachnospiraceae	CAG-411
MAG52	93	3.73	58.33	High	p__Bacteroidetes (UID2605)	2340720	0.584643	230	49552	13358	10177	Bacteria	Bacteroidota	Bacteroidia	Bacteroidales	UBA932	RC9	RC9 sp900319855
MAG53	87.13	2.77	25	Medium	o__Bacteroidales (UID2657)	2212705	0.493598	119	93083	32911	18594.2	Bacteria	Bacteroidota	Bacteroidia	Bacteroidales	Bacteroidaceae	UBA1179	UBA1179 sp900318995
MAG54	86.03	0.24	100	Medium	p__Bacteroidetes (UID2605)	2043503	0.573025	223	61290	11996	9163.69	Bacteria	Bacteroidota	Bacteroidia	Bacteroidales	UBA932	RC9	RC9 sp900320185
MAG55	97.09	0	0	High	o__Clostridiales (UID1212)	2476301	0.3835	142	102804	26249	17438.7	Bacteria	Firmicutes_A	Clostridia	Lachnospirales	Lachnospiraceae	UBA9722	UBA9722 sp900315015
MAG56	83.62	9.66	37.84	Medium	k__Bacteria (UID203)	1442157	0.56666	252	25187	6370	5722.85	Bacteria	Bacteroidota	Bacteroidia	Bacteroidales	UBA932	RC9
MAG57	93.86	0.6	0	High	f__Lachnospiraceae (UID1286)	2098520	0.41637	18	401378	209064	116584	Bacteria	Firmicutes_A	Clostridia	Lachnospirales	Lachnospiraceae	XBD2001
MAG58	98.78	0	0	High	o__Selenomonadales (UID1024)	2093562	0.571643	69	122498	40574	30341.5	Bacteria	Firmicutes_C	Negativicutes	Acidaminococcales	Acidaminococcaceae	Acidaminococcus	Acidaminococcus fermentans
MAG59	88.89	0.85	0	Medium	k__Bacteria (UID1453)	1969315	0.346243	36	246219	118913	54703.2	Bacteria	Cyanobacteria	Vampirovibrionia	Gastranaerophilales	Gastranaerophilaceae	Zag111
MAG6	87.66	1.34	50	Medium	o__Clostridiales (UID1212)	1805657	0.614024	246	36028	9211	7340.07	Bacteria	Firmicutes_A	Clostridia	Oscillospirales	Oscillospiraceae	CAG-110	CAG-110 sp900315595
MAG60	96.27	0	0	High	o__Selenomonadales (UID1024)	1982919	0.591175	54	126114	51358	36720.7	Bacteria	Firmicutes_C	Negativicutes	Acidaminococcales	Acidaminococcaceae	Succiniclasticum	Succiniclasticum sp900315805
MAG61	88.89	1.71	0	Medium	k__Bacteria (UID1453)	2024884	0.347432	82	145762	42016	24693.7	Bacteria	Cyanobacteria	Vampirovibrionia	Gastranaerophilales	Gastranaerophilaceae	UBA1221
MAG62	98.1	0.32	0	High	k__Bacteria (UID2372)	2336768	0.502661	77	157364	42275	30347.6	Bacteria	Firmicutes	Bacilli	Erysipelotrichales	Erysipelotrichaceae	Bulleidia	Bulleidia massiliensis
MAG63	87.77	4.93	90	Medium	o__Clostridiales (UID1212)	2533507	0.478654	265	52933	13379	9560.4	Bacteria	Firmicutes_A	Clostridia	Oscillospirales	Ruminococcaceae	Ruminococcus_D
MAG64	95.89	0	0	High	f__Lachnospiraceae (UID1286)	2161194	0.437196	72	114160	42017	30016.6	Bacteria	Firmicutes_A	Clostridia	Lachnospirales	Lachnospiraceae	UBA629	UBA629 sp900317915
MAG65	98.9	0	0	High	k__Bacteria (UID2495)	2666043	0.488428	46	263009	111297	57957.5	Bacteria	Fibrobacterota	Fibrobacteria	Fibrobacterales	Fibrobacteraceae	Fibrobacter_A	Fibrobacter_A sp002390045
MAG66	98.67	0.51	0	High	g__Prevotella (UID2724)	2885912	0.515006	66	154310	63570	43725.9	Bacteria	Bacteroidota	Bacteroidia	Bacteroidales	Bacteroidaceae	Prevotella	Prevotella sp002481295
MAG67	91.26	1.26	0	High	o__Bacteroidales (UID2657)	2773439	0.480422	104	127598	38949	26667.7	Bacteria	Bacteroidota	Bacteroidia	Bacteroidales	Bacteroidaceae	UBA4334	UBA4334 sp900316975
MAG68	87.78	1.61	40	Medium	k__Bacteria (UID2569)	2168838	0.544116	218	48785	13020	9948.8	Bacteria	Bacteroidota	Bacteroidia	Bacteroidales	P3	UBA1217	UBA1217 sp002371315
MAG69	98.66	0	0	High	o__Clostridiales (UID1212)	2116637	0.394043	26	292665	145415	81409.1	Bacteria	Firmicutes_A	Clostridia	Lachnospirales	Lachnospiraceae
MAG7	86.35	1.9	40	Medium	p__Bacteroidetes (UID2605)	2163223	0.571467	179	94358	18604	12085	Bacteria	Bacteroidota	Bacteroidia	Bacteroidales	UBA932	RC9	RC9 sp900318565
MAG70	91.59	1.98	12.5	High	o__Bacteroidales (UID2657)	2360526	0.448908	83	127663	48775	28440.1	Bacteria	Bacteroidota	Bacteroidia	Bacteroidales	Bacteroidaceae	UBA6382	UBA6382 sp002372095
MAG71	91.89	1.82	71.43	High	o__Bacteroidales (UID2617)	2867453	0.521058	60	211067	62806	47790.9	Bacteria	Bacteroidota	Bacteroidia	Bacteroidales	Muribaculaceae	C941
MAG72	87.13	2.35	50	Medium	o__Clostridiales (UID1212)	1696049	0.616958	291	43246	6207	5828.35	Bacteria	Firmicutes_A	Clostridia	Oscillospirales	Oscillospiraceae	CAG-110	CAG-110 sp900315595
MAG73	97.99	0	0	High	o__Clostridiales (UID1212)	2708408	0.36899	172	111748	25779	15746.6	Bacteria	Firmicutes_A	Clostridia	Lachnospirales	Lachnospiraceae	CAG-603	CAG-603 sp900321855
MAG74	86.74	1.95	71.43	Medium	p__Bacteroidetes (UID2605)	2218558	0.522502	330	27013	7810	6722.9	Bacteria	Bacteroidota	Bacteroidia	Bacteroidales	UBA932	RC9	RC9 sp900320965
MAG75	83.03	2.96	83.33	Medium	o__Clostridiales (UID1212)	1607493	0.617151	260	26346	7129	6182.67	Bacteria	Firmicutes_A	Clostridia	Oscillospirales	Oscillospiraceae	CAG-110	CAG-110 sp900315595
MAG76	93.01	4.3	10	High	k__Bacteria (UID2569)	2270841	0.56019	73	133004	50287	31107.4	Bacteria	Bacteroidota	Bacteroidia	Bacteroidales	P3	UBA1711
MAG77	93.12	0.86	33.33	High	o__Bacteroidales (UID2716)	3165900	0.552679	91	116415	55161	34790.1	Bacteria	Bacteroidota	Bacteroidia	Bacteroidales	Bacteroidaceae	Prevotella
MAG78	92.2	1.63	0	High	g__Prevotella (UID2724)	2669032	0.551927	143	70100	26641	18664.6	Bacteria	Bacteroidota	Bacteroidia	Bacteroidales	Bacteroidaceae	Prevotella	Prevotella sp900315835
MAG79	92.93	0	0	High	o__Clostridiales (UID1212)	2601280	0.457649	219	64436	16249	11878	Bacteria	Firmicutes_A	Clostridia	Lachnospirales	Lachnospiraceae	TF01-11
MAG8	93.55	8.34	16.22	Medium	o__Bacteroidales (UID2716)	3014194	0.471765	214	64147	21558	14085	Bacteria	Bacteroidota	Bacteroidia	Bacteroidales	Bacteroidaceae	Prevotella
MAG80	91.62	0.56	50	High	o__Bacteroidales (UID2716)	3023926	0.545793	70	149640	75760	43198.9	Bacteria	Bacteroidota	Bacteroidia	Bacteroidales	Bacteroidaceae	Prevotella
MAG81	98.52	0.94	20	High	o__Bacteroidales (UID2716)	3228221	0.476594	58	178905	96606	55659	Bacteria	Bacteroidota	Bacteroidia	Bacteroidales	Bacteroidaceae	Prevotella	Prevotella sp900314755
MAG82	90.63	0.56	42.86	High	o__Bacteroidales (UID2617)	2665172	0.552232	241	50170	15619	11058.8	Bacteria	Bacteroidota	Bacteroidia	Bacteroidales	Muribaculaceae	C941
MAG83	80.69	2.46	33.33	Medium	o__Bacteroidales (UID2617)	1951204	0.56567	276	39330	8572	7069.58	Bacteria	Bacteroidota	Bacteroidia	Bacteroidales	Muribaculaceae	C941
MAG84	89.23	0.79	100	Medium	p__Bacteroidetes (UID2605)	2058125	0.566524	107	94418	28884	19234.8	Bacteria	Bacteroidota	Bacteroidia	Bacteroidales	UBA932	RC9	RC9 sp002371115
MAG85	88.28	1.08	100	Medium	k__Bacteria (UID2569)	1906395	0.482713	83	96834	39096	22968.6	Bacteria	Bacteroidota	Bacteroidia	Bacteroidales	Paludibacteraceae	RF16	RF16 sp900320865
MAG86	86.83	5.34	41.67	Medium	o__Clostridiales (UID1212)	1842384	0.615814	267	32910	8365	6900.31	Bacteria	Firmicutes_A	Clostridia	Oscillospirales	Oscillospiraceae	CAG-110	CAG-110 sp900315595
MAG87	93.14	3.56	50	High	o__Clostridiales (UID1212)	2291154	0.57157	163	59732	22755	14056.2	Bacteria	Firmicutes_A	Clostridia_A	Christensenellales	CAG-138	UBA3857
MAG88	91.67	1.61	33.33	High	k__Bacteria (UID2569)	2283032	0.497821	88	130050	40497	25943.5	Bacteria	Bacteroidota	Bacteroidia	Bacteroidales	P3	UBA1217
MAG89	85.9	0	0	Medium	f__Veillonellaceae (UID1032)	2143529	0.605873	137	128764	25688	15646.2	Bacteria	Firmicutes_C	Negativicutes	Selenomonadales	Selenomonadaceae	Selenomonas_C	Selenomonas_C bovis
MAG9	84.11	6.96	25	Medium	o__Clostridiales (UID1212)	2066841	0.630227	323	39379	7511	6398.89	Bacteria	Firmicutes_A	Clostridia	Oscillospirales	Oscillospiraceae
MAG90	83.16	3.24	17.65	Medium	g__Prevotella (UID2724)	2294841	0.412057	291	38839	9952	7886.05	Bacteria	Bacteroidota	Bacteroidia	Bacteroidales	Bacteroidaceae	Prevotella	Prevotella sp002391185
MAG91	91.05	0.69	50	High	o__Bacteroidales (UID2716)	2879932	0.463517	99	99732	48686	29090.2	Bacteria	Bacteroidota	Bacteroidia	Bacteroidales	Bacteroidaceae	Prevotella	Prevotella sp002373375
MAG92	98.71	0.31	0	High	o__Bacteroidales (UID2716)	3539444	0.496218	51	355128	113298	69400.9	Bacteria	Bacteroidota	Bacteroidia	Bacteroidales	Bacteroidaceae	Prevotella	Prevotella sp900314655
MAG93	88.85	1.12	42.86	Medium	o__Bacteroidales (UID2657)	2678542	0.483884	71	202316	88090	37725.9	Bacteria	Bacteroidota	Bacteroidia	Bacteroidales	Bacteroidaceae	UBA4334	UBA4334 sp900318775
MAG94	87.85	2.03	0	Medium	g__Prevotella (UID2724)	2502116	0.477026	174	64835	19675	14380	Bacteria	Bacteroidota	Bacteroidia	Bacteroidales	Bacteroidaceae	Prevotella	Prevotella sp900315635
MAG95	91.23	9.09	17.65	Medium	k__Bacteria (UID203)	3116781	0.323733	320	68335	14047	9739.94	Bacteria	Firmicutes_A	Clostridia	Lachnospirales	Lachnospiraceae	Eubacterium_S	Eubacterium_S uniforme
MAG96	87.29	1.73	25	Medium	o__Bacteroidales (UID2657)	2668817	0.47979	93	109420	44056	28697	Bacteria	Bacteroidota	Bacteroidia	Bacteroidales	Bacteroidaceae	UBA4334	UBA4334 sp900316975
MAG97	83	1.42	50	Medium	k__Bacteria (UID1453)	1795449	0.335068	182	44457	14697	9865.1	Bacteria	Cyanobacteria	Vampirovibrionia	Gastranaerophilales	Gastranaerophilaceae	UBA2813
MAG98	94.62	1.08	0	High	k__Bacteria (UID2565)	1417282	0.393049	64	123705	39125	22145	Bacteria	Proteobacteria	Alphaproteobacteria	RF32	CAG-239	RUG410
MAG99	96.45	0.71	50	High	o__Clostridiales (UID1120)	2124187	0.473624	138	94676	24756	15392.7	Bacteria	Firmicutes_A	Clostridia	Saccharofermentanales	Saccharofermentanaceae	Saccharofermentans

## Sheet: gene annotation
Genome ID	Acetoacetyl-CoA reductase	Butyryl-CoA dehydrogenase	Crotonoyl-CoA reductase	Lactate dehydrogenase	Malate dehydrogenase	Glutamate synthase			Succinate dehydrogenase		Bifurcating hydrogenases		Fermentative hydrogenases			Sensory hydrogenases			Energy-converting hydrogenases				Methanogenic hydrogenases					Respiratory hydrogenases		Hydrogenase-associated diaphorases	Methanogenesis			Reductive acetogenesis				Nitrate reduction	Nitrite reduction to ammonium		Adenylylsulfate reductase	Sulfite reductase		Dimethyl sulfoxide reductase
	PaaH	ACADS	FabV	LDH	MDH	GdhA	GltB	GltD	SdhA	FrdA	FeFeA3	FeFeA4	FeFeA1	FeFeA2	FeFeB	FeFeC1	FeFeC2	FeFeC3	NiFe4c	NiFe4e	NiFe4f	NiFe4g	Fe	NiFe3a	NiFe3c	NiFe4h	NiFe4i	NiFe1d	NiFe1b	HydB	Mtd	Mer	McrA	CooS	CodH	FdhA	AcsB	NarG	NirB	NrfA	AprA	AsrA	DsrA	DmsA
MAG1	0	0	0	0	0	1	0	1	0	0	0	0	0	0	0	0	0	0	0	0	0	0	0	0	0	0	0	0	0	0	0	0	0	0	0	0	0	0	0	0	0	0	0	0
MAG10	0	0	0	0	0	2	1	1	0	1	0	0	0	0	0	0	0	0	0	0	0	0	0	0	0	0	0	0	0	0	0	0	0	0	0	0	0	0	0	0	0	0	0	0
MAG101	1	0	0	0	0	0	0	1	0	1	1	0	0	0	0	0	0	0	0	0	0	0	0	0	0	0	0	0	0	1	0	0	0	0	0	0	0	0	0	0	0	0	0	0
MAG102	0	0	0	0	0	2	0	0	0	0	0	0	0	0	0	0	0	0	0	0	0	0	0	0	0	0	0	0	0	0	0	0	0	0	0	0	0	0	0	0	0	0	0	0
MAG103	0	0	0	0	0	2	0	0	0	1	0	0	0	0	0	0	0	0	0	0	0	0	0	0	0	0	0	0	0	0	0	0	0	0	0	0	0	0	0	0	0	0	0	0
MAG104	0	0	0	0	0	2	0	1	0	1	0	0	0	0	0	0	0	0	0	0	0	0	0	0	0	0	0	0	0	0	0	0	0	0	0	0	0	0	0	0	0	0	0	0
MAG105	0	0	0	0	0	1	0	0	0	1	0	0	0	0	0	0	0	0	0	0	0	0	0	1	2	2	1	0	0	0	1	0	0	0	0	1	0	0	0	0	0	0	0	0
MAG106	0	1	0	1	0	1	1	2	0	0	1	0	0	0	0	0	0	0	0	0	0	0	0	0	0	0	0	0	0	1	0	0	0	0	0	0	0	0	0	0	0	0	0	0
MAG107	0	0	0	0	0	2	0	1	0	1	0	0	0	0	0	0	0	0	0	0	0	0	0	0	0	0	0	0	0	0	0	0	0	0	0	0	0	0	0	0	0	0	0	0
MAG108	0	0	0	0	0	1	1	1	0	0	0	0	0	0	0	0	0	0	0	0	0	0	0	0	0	0	0	0	0	0	0	0	0	0	0	0	0	0	0	0	0	0	0	0
MAG11	0	0	0	0	0	2	1	1	0	1	0	0	0	0	0	0	0	0	0	0	0	0	0	0	0	0	0	0	0	0	0	0	0	0	0	0	0	0	0	0	0	0	0	0
MAG110	0	0	0	1	0	0	1	1	0	0	1	0	0	0	0	1	0	0	0	0	0	0	0	0	0	0	0	0	0	2	0	0	0	0	0	0	0	0	0	0	0	0	0	0
MAG111	0	0	0	0	0	0	1	2	0	0	1	0	0	0	0	0	0	0	0	0	0	0	0	0	0	0	0	0	0	1	0	0	0	0	0	0	0	0	0	0	0	0	0	0
MAG112	0	0	0	0	0	0	0	1	0	0	1	0	0	0	0	0	0	0	0	0	0	0	0	0	0	0	0	0	0	1	0	0	0	0	0	0	0	0	0	0	0	0	0	0
MAG113	0	0	0	0	0	1	0	0	0	0	1	0	0	0	0	0	0	0	0	0	0	0	0	0	0	0	0	0	0	1	0	0	0	0	0	0	0	0	0	0	0	0	0	0
MAG114	0	0	0	0	0	0	0	0	0	1	0	0	0	0	0	0	0	0	0	0	0	0	0	0	0	0	0	0	0	0	0	0	0	0	0	0	0	0	0	0	0	0	0	0
MAG115	0	0	0	0	0	1	1	2	0	0	0	0	0	0	0	0	0	0	0	0	0	0	0	0	0	0	0	0	0	0	0	0	0	0	0	0	0	0	0	0	0	0	0	0
MAG116	0	0	0	0	0	2	0	0	0	1	0	0	0	0	0	0	0	0	0	0	0	0	0	0	0	0	0	0	0	0	0	0	0	0	0	0	0	0	0	1	0	0	0	0
MAG117	1	1	0	0	0	1	0	1	0	1	1	0	0	0	0	0	0	0	0	0	0	0	0	0	0	0	0	0	0	1	0	0	0	0	0	0	0	0	0	0	0	0	0	0
MAG118	0	0	0	0	0	2	1	2	0	0	0	0	0	0	0	0	0	0	0	0	0	0	0	0	0	0	0	0	0	0	0	0	0	0	0	0	0	0	0	0	0	0	0	0
MAG119	0	0	0	0	0	1	0	1	0	1	0	0	0	0	0	0	0	0	0	0	0	0	0	0	0	0	0	0	0	0	0	0	0	0	0	0	0	0	0	0	0	0	0	0
MAG12	1	0	0	0	0	1	0	1	0	1	1	0	0	0	0	0	0	0	0	0	0	0	0	0	0	0	0	0	0	1	0	0	0	0	0	0	0	0	0	0	0	0	0	0
MAG120	0	0	0	0	0	0	0	0	0	0	1	0	0	0	0	0	0	0	0	0	0	0	0	0	0	0	0	0	0	1	0	0	0	0	0	0	0	0	0	0	0	0	0	0
MAG121	0	0	0	1	0	1	1	2	0	0	0	0	0	0	1	0	0	0	0	0	0	1	0	0	0	0	0	0	0	0	0	0	0	0	0	0	0	0	0	0	0	0	0	0
MAG122	1	1	0	0	0	1	0	1	0	1	1	0	0	0	0	0	0	0	0	0	0	0	0	0	0	0	0	0	0	1	0	0	0	0	0	0	0	0	0	0	0	0	0	0
MAG123	0	0	0	0	0	2	1	1	0	1	0	0	0	0	0	0	0	0	0	0	0	0	0	0	0	0	0	0	0	0	0	0	0	0	0	0	0	0	0	0	0	0	0	0
MAG124	1	1	0	0	0	1	0	1	0	1	1	0	0	0	0	0	0	0	0	0	0	0	0	0	0	0	0	0	0	1	0	0	0	0	0	0	0	0	0	0	0	0	0	0
MAG125	0	0	0	0	0	0	0	0	0	0	1	0	0	0	0	0	0	0	0	0	0	0	0	0	0	0	0	0	0	0	0	0	0	0	0	0	0	0	0	0	0	0	0	0
MAG127	0	0	1	0	0	1	1	1	0	1	0	0	0	0	0	0	0	0	0	0	0	0	0	0	0	0	0	0	0	0	0	0	0	1	1	1	0	0	0	0	0	0	0	0
MAG128	0	0	0	0	0	0	0	0	0	0	1	0	0	0	0	1	0	0	0	0	0	0	0	0	0	0	0	0	0	2	0	0	0	0	0	0	0	0	0	0	0	0	0	0
MAG129	0	0	0	0	0	0	0	0	0	1	0	0	0	0	0	0	0	0	0	0	0	0	0	1	0	1	1	0	0	0	1	1	0	0	0	1	0	0	0	0	0	0	0	0
MAG13	0	0	1	1	0	1	0	2	0	0	0	0	0	0	1	0	1	0	0	0	0	0	0	0	0	0	0	0	0	0	0	0	0	0	0	0	0	0	0	0	0	0	0	0
MAG130	0	0	0	0	0	1	1	2	0	0	0	0	0	0	0	0	0	0	0	0	0	1	0	0	0	0	0	0	0	0	0	0	0	0	0	0	0	0	0	0	0	0	0	0
MAG131	0	0	0	0	0	0	0	1	0	0	0	0	1	0	0	0	0	0	0	0	1	0	0	0	0	0	0	0	0	0	0	0	0	0	0	0	0	0	0	0	0	0	0	0
MAG132	0	0	1	0	0	0	1	1	0	0	0	0	0	0	1	0	0	0	0	0	0	0	0	0	0	0	0	0	0	0	0	0	0	0	0	0	0	0	0	0	0	0	0	0
MAG133	0	0	0	0	0	0	0	0	0	0	1	0	0	0	1	0	1	1	0	0	0	0	0	0	0	0	0	0	0	1	0	0	0	1	1	0	0	0	0	0	0	0	0	0
MAG134	0	0	0	1	0	0	0	1	0	0	0	0	0	0	1	0	1	0	0	0	0	0	0	0	0	0	0	0	0	0	0	0	0	0	0	0	0	0	0	0	0	0	0	0
MAG135	0	0	0	0	0	0	0	0	0	1	0	0	0	0	0	0	0	0	0	0	0	0	0	0	0	0	0	0	0	0	0	0	0	0	0	0	0	0	0	0	0	0	0	0
MAG136	0	0	0	0	0	1	1	2	0	0	0	0	0	1	1	0	0	0	0	0	0	0	0	0	0	0	0	0	0	0	0	0	0	0	0	0	0	0	0	0	0	0	0	0
MAG137	0	0	0	0	0	0	0	0	0	0	0	0	0	1	0	0	0	0	0	0	0	1	0	0	0	0	0	0	0	0	0	0	0	0	0	0	0	0	0	0	0	0	0	0
MAG138	0	0	0	1	0	0	0	0	0	0	0	0	0	0	0	0	0	0	0	0	0	0	0	0	0	0	0	0	0	0	0	0	0	0	0	0	0	0	0	0	0	0	0	0
MAG139	0	1	0	0	0	1	0	2	0	0	0	0	0	0	0	0	0	0	0	0	0	0	0	0	0	0	0	0	0	0	0	0	0	0	0	0	0	0	0	0	0	0	0	0
MAG14	0	0	0	0	0	2	0	0	0	1	1	0	0	0	0	0	0	0	0	0	0	0	0	0	0	0	0	0	0	1	0	0	0	0	0	0	0	0	0	0	0	0	0	0
MAG140	0	0	0	0	0	1	0	0	0	0	1	0	0	0	1	0	0	0	0	0	0	0	0	0	0	0	0	0	0	1	0	0	0	0	0	0	0	0	0	0	0	0	0	0
MAG141	0	0	0	0	0	1	0	1	0	0	1	0	0	0	1	0	0	1	0	0	0	0	0	0	0	0	0	0	0	1	0	0	0	0	0	0	0	0	0	0	0	0	0	0
MAG142	0	0	0	0	0	0	0	0	0	0	0	0	0	0	0	0	0	0	0	0	0	0	0	0	0	0	0	0	0	0	0	0	0	0	0	0	0	0	0	0	0	0	0	0
MAG143	0	0	0	0	0	1	0	0	0	1	0	0	0	0	0	0	0	0	0	0	0	0	0	0	0	0	0	0	0	0	0	0	0	0	0	0	0	0	0	0	0	0	0	0
MAG144	0	0	0	0	0	1	0	0	0	0	0	0	0	0	0	0	0	0	0	0	0	0	0	0	0	0	0	0	0	0	0	0	0	0	0	0	0	0	0	0	0	0	0	0
MAG145	0	0	0	1	0	0	0	2	0	0	0	0	0	0	0	0	0	0	0	0	0	0	0	0	0	0	0	0	0	0	0	0	0	0	0	0	0	0	0	0	0	0	0	0
MAG146	0	0	0	0	0	1	0	0	0	0	1	0	0	0	1	0	1	0	0	0	0	0	0	0	0	0	0	0	0	0	0	0	0	0	0	0	0	0	0	0	0	0	0	0
MAG147	0	0	0	0	0	1	0	1	0	0	1	0	0	0	1	0	0	1	0	0	0	0	0	0	0	0	0	0	0	1	0	0	0	0	0	0	0	0	0	0	0	0	0	0
MAG148	0	0	0	0	0	0	0	0	0	0	0	0	0	0	0	0	0	0	0	0	0	0	0	0	0	0	0	0	0	1	0	0	0	0	0	0	0	0	0	0	0	0	0	0
MAG15	0	0	0	0	0	1	0	1	0	0	1	0	0	0	0	0	0	0	0	0	0	0	0	0	0	0	0	0	0	1	0	0	0	0	0	0	0	0	0	0	0	0	0	0
MAG150	1	1	1	0	0	0	1	2	0	0	0	0	0	0	1	0	0	0	0	0	0	0	0	0	0	0	0	0	0	0	0	0	0	0	0	0	0	0	0	0	0	0	0	0
MAG151	0	0	0	1	0	1	0	0	0	0	0	0	0	0	0	0	0	0	0	0	0	0	0	0	0	0	0	0	0	0	0	0	0	0	0	0	0	0	0	0	0	0	0	0
MAG152	0	0	0	0	0	1	0	1	0	0	1	0	0	1	0	0	0	0	0	0	0	0	0	0	0	0	0	0	0	1	0	0	0	0	0	0	0	0	0	0	0	0	0	0
MAG153	1	1	0	0	0	1	1	2	0	0	0	0	0	0	2	0	0	0	0	0	0	0	0	0	0	0	0	0	0	0	0	0	0	0	0	0	0	0	0	0	1	0	0	0
MAG154	0	0	0	0	0	1	0	1	0	1	0	0	0	0	0	0	0	0	0	0	0	0	0	0	0	0	0	0	0	0	0	0	0	0	0	0	0	0	0	0	0	0	0	0
MAG155	0	0	0	0	0	0	0	0	0	0	0	0	0	0	0	0	0	0	0	0	0	0	0	0	0	0	0	0	0	0	0	0	0	0	0	0	0	0	0	0	0	0	0	0
MAG156	0	0	0	0	0	1	1	1	0	0	0	0	0	0	0	0	0	0	0	0	0	0	0	0	0	0	0	0	0	0	0	0	0	0	0	0	0	0	0	0	0	0	0	0
MAG157	0	0	1	0	0	1	0	0	0	0	0	0	0	0	1	0	0	0	0	0	0	0	0	0	0	0	0	0	0	0	0	0	0	0	0	0	0	0	0	0	0	0	0	0
MAG158	0	0	0	0	0	1	0	1	0	0	0	0	0	0	0	0	0	0	0	0	0	0	0	0	0	0	0	0	0	0	0	0	0	0	0	0	1	0	0	0	0	0	0	0
MAG159	0	0	0	0	0	0	0	0	0	0	1	0	0	0	0	1	0	0	0	0	0	0	0	0	0	0	0	0	0	0	0	0	0	0	0	0	0	0	0	0	0	0	0	0
MAG16	0	0	0	0	0	1	0	1	0	0	1	0	0	0	1	0	0	0	0	0	0	0	0	0	0	0	0	0	0	2	0	0	0	0	0	0	0	0	0	0	0	0	0	0
MAG160	0	0	0	0	0	0	1	2	0	0	0	0	0	0	1	0	1	0	0	0	0	0	0	0	0	0	0	0	0	0	0	0	0	0	0	0	0	0	0	0	0	0	0	0
MAG161	0	0	0	0	0	0	0	0	0	0	1	0	0	0	0	0	1	0	0	0	0	0	0	0	0	0	0	0	0	0	0	0	0	0	0	0	0	0	0	0	0	0	0	0
MAG162	1	1	0	0	0	1	0	2	0	0	0	0	0	0	1	0	0	0	0	1	0	0	0	0	0	0	0	0	0	0	0	0	0	0	0	0	0	0	0	0	0	0	0	0
MAG163	0	0	0	0	0	0	0	2	0	0	0	0	0	0	0	0	0	0	0	0	0	0	0	0	0	0	0	0	0	1	0	0	0	0	0	2	0	0	0	0	0	0	0	0
MAG164	0	0	0	1	0	1	0	2	0	0	0	0	0	0	0	0	0	0	0	0	0	0	0	0	0	0	0	0	0	1	0	0	0	0	0	1	0	0	0	0	0	0	0	0
MAG165	0	0	0	0	0	1	0	0	0	0	0	0	0	0	0	0	0	0	0	0	0	0	0	0	0	0	0	0	0	0	0	0	0	0	0	0	0	0	0	0	0	0	0	0
MAG166	0	0	0	1	0	1	0	1	0	0	0	0	0	1	1	0	0	0	0	0	0	0	0	0	0	0	0	0	0	0	0	0	0	0	0	0	0	0	0	0	0	0	0	0
MAG167	0	0	0	0	0	2	0	0	0	0	0	0	0	0	0	0	0	0	0	0	0	0	0	0	0	0	0	0	0	1	0	0	0	0	0	0	0	0	0	0	0	0	0	0
MAG168	0	0	0	0	0	0	0	1	0	0	2	0	0	0	0	0	0	0	0	0	0	0	0	0	0	0	0	0	0	2	0	0	0	0	0	0	0	0	0	0	0	0	0	0
MAG169	0	0	0	1	0	0	0	2	0	0	1	0	0	0	0	0	0	0	0	0	0	1	0	0	0	0	0	0	0	0	0	0	0	0	0	0	0	0	0	0	0	0	0	0
MAG17	0	0	0	1	0	1	1	2	0	0	1	0	0	0	0	0	1	0	0	0	0	0	0	0	0	0	0	0	0	1	0	0	0	0	0	0	0	0	0	0	0	0	0	0
MAG170	0	0	0	0	0	1	0	0	0	0	0	0	0	0	0	1	0	0	0	0	0	0	0	0	0	0	0	0	0	0	0	0	0	0	0	0	0	0	0	0	0	0	0	0
MAG171	0	0	0	0	0	0	0	1	0	0	1	0	0	0	0	0	0	0	0	0	0	0	0	0	0	0	0	0	0	0	0	0	0	0	0	0	0	0	0	0	0	0	0	0
MAG172	0	1	0	0	0	1	1	1	0	0	0	0	0	0	1	0	0	0	0	1	0	0	0	0	0	0	0	0	0	0	0	0	0	0	0	0	0	0	0	0	0	0	0	0
MAG174	1	1	0	0	0	0	1	2	0	0	0	0	0	0	0	0	0	0	0	0	0	0	0	0	0	0	0	0	0	0	0	0	0	0	0	0	0	0	0	0	0	0	0	0
MAG175	0	0	0	0	0	0	0	0	0	0	0	0	0	0	1	0	1	0	0	0	0	0	0	0	0	0	0	0	0	0	0	0	0	0	0	0	0	0	0	0	1	0	0	0
MAG176	1	1	0	0	0	1	1	2	0	0	0	0	0	0	0	0	0	0	0	0	0	0	0	0	0	0	0	0	0	0	0	0	0	0	0	0	0	0	0	0	0	0	0	0
MAG177	0	0	0	0	0	0	0	0	0	0	1	0	0	0	0	0	0	0	0	0	0	0	0	0	0	0	0	0	0	1	0	0	0	0	0	0	0	0	0	0	0	0	0	0
MAG178	0	0	0	0	1	0	0	1	1	1	1	0	0	0	0	0	0	0	0	0	0	0	0	0	0	0	0	1	0	1	0	0	0	1	1	0	0	1	0	1	1	0	0	0
MAG179	0	0	0	0	0	1	0	1	0	0	0	0	0	0	1	0	0	0	0	0	0	0	0	0	0	0	0	0	0	0	0	0	0	0	0	0	0	0	0	0	0	1	0	0
MAG18	0	0	0	0	0	1	1	2	0	0	0	0	0	0	0	0	0	0	0	0	0	0	0	0	0	0	0	0	0	0	0	0	0	0	0	0	0	0	0	1	0	0	0	0
MAG180	0	0	0	0	0	0	0	0	0	0	1	0	0	0	0	0	0	0	0	0	0	0	0	0	0	0	0	0	0	1	0	0	0	0	0	0	0	0	0	0	0	0	0	0
MAG182	0	0	0	0	0	0	0	0	0	0	0	0	0	0	0	0	0	0	0	0	0	0	0	0	0	0	0	0	0	0	0	0	0	0	0	0	0	0	0	0	0	0	0	0
MAG183	0	0	0	0	0	2	0	1	0	0	0	0	0	0	0	0	0	0	0	0	0	0	0	0	0	0	0	0	0	0	0	0	0	0	0	0	0	0	0	0	0	0	0	0
MAG184	0	0	0	0	0	0	0	1	0	0	0	0	0	0	0	0	0	0	0	0	0	0	0	0	0	0	0	0	1	0	0	0	0	0	0	0	0	0	0	1	0	0	0	0
MAG185	0	0	1	0	0	1	1	2	0	0	1	0	0	0	0	0	0	0	0	0	0	0	0	0	0	0	0	0	0	1	0	0	0	0	0	0	0	0	0	0	0	0	0	0
MAG187	0	0	0	0	0	0	0	0	0	1	0	0	0	0	0	0	0	0	0	0	0	0	1	0	0	1	0	0	0	0	0	1	0	0	0	0	0	0	0	0	0	0	0	0
MAG188	0	0	0	0	0	1	1	2	0	1	0	0	0	0	0	0	0	0	0	0	0	0	0	0	0	0	0	0	0	0	0	0	0	0	0	0	0	0	0	0	0	0	0	0
MAG189	0	0	1	0	0	0	0	1	0	0	0	0	0	0	0	0	0	0	0	0	0	0	0	0	0	0	0	0	0	0	0	0	0	1	1	0	0	0	0	0	1	0	0	0
MAG19	0	0	0	0	0	2	0	2	0	1	0	0	0	0	0	0	0	0	0	0	0	0	0	0	0	0	0	0	0	0	0	0	0	0	0	0	0	0	0	1	0	0	0	0
MAG190	0	0	0	0	0	0	0	2	0	0	0	0	0	0	0	0	0	0	0	0	0	0	0	0	0	0	0	0	0	0	0	0	0	0	0	1	0	0	0	0	0	0	0	0
MAG191	0	0	0	1	0	0	0	0	0	0	0	0	0	0	0	0	0	0	0	0	0	0	0	0	0	0	0	0	0	1	0	0	0	0	0	0	0	0	0	0	0	0	0	0
MAG192	0	0	0	0	0	1	0	0	0	1	0	0	0	0	0	0	0	0	0	0	0	0	0	0	0	0	0	0	0	0	0	0	0	0	0	0	0	0	0	0	0	0	0	0
MAG193	0	0	0	0	0	0	0	1	0	0	1	0	0	0	0	0	0	0	0	0	0	0	0	0	0	0	0	0	0	1	0	0	0	0	0	0	0	0	0	0	0	0	0	0
MAG194	0	0	0	0	0	0	0	0	0	0	0	0	0	0	0	0	1	0	0	0	0	0	0	0	0	0	0	0	0	0	0	0	0	0	0	0	0	0	0	0	0	0	0	0
MAG195	0	0	0	0	0	1	1	0	0	1	0	0	0	0	0	0	0	0	0	0	0	0	0	0	0	0	0	0	0	0	0	0	0	0	0	0	0	0	0	0	0	0	0	0
MAG196	1	0	0	1	0	1	1	1	0	0	1	0	0	0	1	0	0	0	0	0	0	0	0	0	0	0	0	0	0	1	0	0	0	0	0	1	0	0	0	0	0	0	0	0
MAG197	0	0	0	0	0	0	0	1	0	0	0	0	0	0	0	0	0	0	0	0	0	0	0	0	0	0	0	0	0	0	0	0	0	0	0	0	0	0	0	0	0	0	0	0
MAG198	1	1	0	0	0	2	0	0	0	0	0	0	0	0	0	0	0	0	0	0	0	0	0	0	0	0	0	0	0	0	0	0	0	0	0	0	0	0	0	0	0	0	0	0
MAG199	0	0	0	1	0	0	0	1	0	0	0	0	0	0	0	0	0	0	0	0	0	0	0	0	0	0	0	0	0	0	0	0	0	0	0	0	0	0	0	0	0	0	0	0
MAG2	0	0	0	1	0	1	0	1	0	0	0	0	0	0	1	0	0	1	0	0	0	0	0	0	0	0	0	0	0	1	0	0	0	0	0	0	0	0	0	0	0	0	0	0
MAG20	0	0	0	0	0	1	0	1	0	0	1	0	0	0	0	0	0	0	0	0	0	0	0	0	0	0	0	0	0	1	0	0	0	0	0	0	0	0	0	0	0	0	0	0
MAG200	0	0	0	0	0	1	0	1	0	0	0	0	0	0	0	0	0	0	0	0	0	0	0	0	0	0	0	0	0	0	0	0	0	0	0	0	0	0	0	0	0	0	0	0
MAG201	0	0	0	0	0	0	0	1	0	0	0	0	0	0	0	0	0	0	0	0	0	0	0	0	0	0	0	0	0	0	0	0	0	0	0	0	0	0	0	0	0	0	0	0
MAG202	0	0	0	1	0	1	1	1	0	0	0	0	0	0	1	0	0	0	0	0	0	0	0	0	0	0	0	0	0	0	0	0	0	0	0	0	0	0	0	0	0	1	0	0
MAG203	0	0	0	0	0	1	0	0	0	0	0	0	0	0	0	0	0	0	0	0	0	0	0	0	0	0	0	0	0	0	0	0	0	0	0	0	0	0	0	0	0	0	0	0
MAG204	0	0	0	0	0	0	0	0	0	0	1	0	0	0	0	1	0	0	0	0	0	0	0	0	0	0	0	0	0	1	0	0	0	0	0	0	0	0	0	0	0	0	0	0
MAG205	0	0	0	0	0	0	0	1	0	0	0	0	0	0	0	0	0	0	0	0	0	0	0	0	0	0	0	0	0	0	0	0	0	0	0	0	0	0	0	0	0	0	0	0
MAG206	1	1	0	0	0	0	0	1	0	1	0	0	0	0	0	0	0	0	0	0	0	0	0	0	0	0	0	0	0	0	0	0	0	0	0	0	0	0	0	0	0	0	0	0
MAG207	0	0	0	1	0	0	0	1	0	0	1	0	0	0	0	0	0	0	0	0	0	0	0	0	0	0	0	0	0	1	0	0	0	0	0	0	0	0	0	0	0	0	0	0
MAG208	0	0	0	1	0	2	0	0	0	0	1	0	0	0	1	0	0	1	0	0	0	0	0	0	0	0	0	0	0	1	0	0	0	0	0	0	0	0	0	0	0	0	0	0
MAG209	0	0	0	0	0	0	1	2	0	0	0	0	0	0	1	0	0	0	0	0	0	0	0	0	0	0	0	0	0	0	0	0	0	2	2	0	0	0	0	0	1	0	0	0
MAG21	0	0	0	0	0	1	0	1	0	1	0	0	0	0	0	0	0	0	0	0	0	0	0	0	0	0	0	0	0	0	0	0	0	0	0	0	0	0	0	0	0	0	0	0
MAG210	0	0	0	0	0	0	0	0	0	0	0	0	0	0	0	0	0	0	0	0	0	0	0	0	0	0	0	0	0	0	0	0	0	0	0	0	0	0	0	0	0	0	0	0
MAG211	0	0	0	0	0	0	0	1	0	0	0	0	0	0	0	0	0	0	0	0	0	0	0	0	0	0	0	0	0	0	0	0	0	0	0	1	0	0	0	0	0	0	0	0
MAG212	0	0	0	0	0	1	1	2	0	0	0	0	0	0	1	0	0	0	0	0	0	0	0	0	0	0	0	0	0	0	0	0	0	0	0	0	0	0	0	0	0	0	0	0
MAG213	0	0	0	0	0	2	1	1	0	0	0	0	0	1	0	0	0	0	0	0	0	0	0	0	0	0	0	0	0	0	0	0	0	1	1	0	0	0	0	0	0	0	0	0
MAG214	0	0	0	0	0	0	0	0	0	0	1	0	0	0	0	0	1	0	0	0	0	0	0	0	0	0	0	0	0	2	0	0	0	0	0	0	0	0	0	0	0	0	0	0
MAG215	0	0	0	1	0	0	0	0	0	0	1	0	0	0	0	0	0	0	0	0	0	0	0	0	0	0	0	0	0	0	0	0	0	0	0	0	0	0	0	0	0	0	0	0
MAG216	0	0	0	0	0	0	0	0	0	0	0	0	0	0	0	0	0	0	0	0	0	0	0	0	0	0	0	0	0	0	0	0	0	0	0	0	0	0	0	0	0	0	0	0
MAG217	0	0	0	0	0	1	0	1	0	0	0	0	0	0	0	0	0	0	0	0	0	0	0	0	0	0	0	0	0	0	0	0	0	0	0	0	0	0	0	0	0	0	0	0
MAG218	1	1	0	0	0	1	1	2	0	0	0	0	0	0	1	0	0	0	0	0	0	0	0	0	0	0	0	0	0	0	0	0	0	0	0	0	0	0	0	0	0	0	0	0
MAG219	0	0	0	0	0	0	1	2	0	0	0	0	0	0	0	0	0	0	0	0	0	0	0	0	0	0	0	0	0	0	0	0	0	0	0	0	0	0	0	0	0	0	0	0
MAG22	0	0	0	0	0	2	0	1	0	1	0	0	0	0	0	0	0	0	0	0	0	0	0	0	0	0	0	0	0	0	0	0	0	0	0	0	0	0	0	0	0	0	0	0
MAG220	0	0	0	0	0	2	0	0	0	1	0	0	0	0	0	0	0	0	0	0	0	0	0	0	0	0	0	0	0	0	0	0	0	0	0	0	0	0	0	0	0	0	0	0
MAG221	0	0	0	0	0	0	1	2	0	0	0	0	0	0	0	1	0	0	0	0	0	0	0	0	0	0	0	0	0	0	0	0	0	0	0	0	0	0	0	0	0	0	0	0
MAG222	0	0	1	0	0	1	1	1	0	0	0	0	0	0	0	0	0	0	0	0	0	0	0	0	0	0	0	0	0	0	0	0	0	0	0	0	0	0	0	0	0	0	0	0
MAG223	0	0	1	0	0	0	0	2	0	0	0	0	0	0	1	0	0	0	0	0	0	0	0	0	0	0	0	0	0	0	0	0	0	0	0	0	0	0	0	0	0	0	0	0
MAG224	0	0	0	1	0	2	0	0	0	0	1	0	0	1	0	0	0	0	0	0	0	0	0	0	0	0	0	0	0	1	0	0	0	0	0	0	0	0	0	0	0	0	0	0
MAG225	0	0	0	0	0	1	1	1	0	1	0	0	0	0	0	0	0	0	0	0	0	0	0	0	0	0	0	0	0	0	0	0	0	0	0	0	0	0	0	0	0	0	0	0
MAG226	0	0	1	1	0	0	1	2	0	0	0	0	0	0	0	0	0	0	0	0	0	0	0	0	0	0	0	0	0	1	0	0	0	0	0	0	0	0	0	0	0	0	0	0
MAG227	0	0	0	0	0	0	0	0	0	0	0	0	0	0	0	0	0	0	0	0	0	0	0	0	0	0	0	0	0	0	0	0	0	0	0	0	0	0	0	0	0	0	0	0
MAG228	0	0	0	0	0	0	0	1	0	0	0	0	0	0	1	0	0	0	0	1	0	0	0	0	0	0	0	0	0	0	0	0	0	0	0	0	0	0	0	0	0	0	0	0
MAG229	0	0	0	0	0	2	0	0	0	0	1	0	0	1	0	0	0	0	0	0	0	0	0	0	0	0	0	0	0	2	0	0	0	0	0	0	0	0	0	0	0	0	0	0
MAG23	0	0	0	0	0	2	0	1	0	1	0	0	0	0	0	0	0	0	0	0	0	0	0	0	0	0	0	0	0	0	0	0	0	0	0	0	0	0	0	0	0	0	0	0
MAG230	1	0	0	0	0	0	0	0	0	0	0	0	0	0	0	0	0	1	0	0	0	1	0	0	0	0	0	0	0	0	0	0	0	0	0	0	0	0	0	0	0	0	0	0
MAG231	0	0	0	1	0	1	1	1	0	0	0	0	0	0	1	0	0	0	0	0	0	0	0	0	0	0	0	0	0	0	0	0	0	0	0	0	0	0	0	0	0	0	0	0
MAG232	0	0	0	0	0	1	0	1	0	0	1	0	0	0	0	0	0	0	0	0	0	0	0	0	0	0	0	0	0	1	0	0	0	0	0	0	0	0	0	0	0	0	0	0
MAG233	0	0	0	1	0	0	1	2	0	0	1	0	0	0	1	0	0	0	0	0	0	0	0	0	0	0	0	0	0	1	0	0	0	0	0	2	0	0	0	0	0	0	0	0
MAG234	0	0	0	1	0	0	0	0	0	0	1	0	0	0	1	0	0	0	0	0	0	0	0	0	0	0	0	0	0	1	0	0	0	0	0	0	0	0	0	0	0	0	0	0
MAG235	0	0	0	1	0	0	0	0	0	0	1	0	0	0	0	0	1	0	0	0	0	0	0	0	0	0	0	0	0	1	0	0	0	0	0	0	0	0	0	0	0	0	0	0
MAG236	0	0	0	0	0	0	0	1	0	0	0	0	0	0	1	0	0	0	0	0	0	0	0	0	0	0	0	0	0	0	0	0	0	0	0	0	0	0	0	0	0	0	0	0
MAG237	0	0	0	1	0	0	0	0	0	0	0	0	0	0	0	0	0	0	0	0	0	0	0	0	0	0	0	0	0	0	0	0	0	0	0	0	0	0	0	0	0	0	0	0
MAG238	0	0	0	0	0	0	0	0	0	0	2	0	0	0	0	0	0	0	0	0	0	0	0	0	0	0	0	0	0	2	0	0	0	0	0	0	0	0	0	0	0	0	0	0
MAG239	0	0	0	0	0	0	0	0	0	0	0	0	0	0	1	0	0	0	0	0	0	0	0	0	0	0	0	0	0	0	0	0	0	0	0	0	0	0	0	0	0	0	0	0
MAG24	1	1	0	0	0	1	0	1	0	1	1	0	0	0	0	0	0	0	0	0	0	0	0	0	0	0	0	0	0	1	0	0	0	0	0	0	0	0	0	0	0	0	0	0
MAG240	0	0	0	0	0	1	0	0	0	1	0	0	0	0	0	0	0	0	0	0	0	0	0	0	0	1	0	0	0	0	0	0	0	0	0	1	0	0	0	0	0	0	0	0
MAG241	0	0	0	1	0	1	0	0	0	0	0	0	0	0	0	0	0	0	0	0	0	0	0	0	0	0	0	0	0	0	0	0	0	0	0	0	0	0	0	0	0	0	0	0
MAG242	1	1	0	0	1	1	1	1	1	0	0	0	0	0	0	0	0	0	0	0	0	0	0	0	0	0	0	0	0	0	0	0	0	0	0	1	0	1	1	0	0	0	0	1
MAG243	0	0	0	3	0	1	0	0	0	0	1	0	0	0	1	0	0	0	0	0	0	0	0	0	0	0	0	0	0	1	0	0	0	0	0	0	0	0	0	0	0	0	0	0
MAG244	0	0	0	1	0	0	1	3	0	0	1	0	0	0	1	0	0	0	0	0	0	0	0	0	0	0	0	0	0	0	0	0	0	0	0	0	0	0	0	0	0	0	0	0
MAG245	0	0	0	0	0	1	1	2	0	0	1	0	0	1	0	0	0	0	0	0	0	0	0	0	0	0	0	0	0	0	0	0	0	0	0	0	0	0	0	0	0	0	0	0
MAG246	0	0	0	1	0	1	0	0	0	0	1	0	0	0	1	0	0	0	0	0	0	0	0	0	0	0	0	0	0	1	0	0	0	0	0	0	0	0	0	0	0	0	0	0
MAG247	0	0	0	0	0	1	0	1	0	0	0	0	0	0	0	0	0	0	0	0	0	0	0	0	0	0	0	0	0	0	0	0	0	0	0	0	0	0	0	0	0	0	0	0
MAG248	0	0	0	0	0	0	0	1	0	1	0	0	0	0	0	0	0	0	0	0	0	0	0	0	0	0	0	0	0	0	0	0	0	0	0	0	0	0	0	0	0	0	0	0
MAG249	0	0	0	0	0	2	0	1	0	0	0	0	0	0	0	0	0	0	0	0	0	0	0	0	0	0	0	0	0	0	0	0	0	0	0	0	0	0	0	0	0	0	0	0
MAG25	0	0	0	0	0	1	0	1	0	0	0	0	0	0	0	0	0	0	0	0	0	1	0	0	0	0	0	0	0	0	0	0	0	0	0	0	0	0	0	0	0	0	0	0
MAG250	0	0	0	0	0	1	0	1	0	0	1	0	0	0	0	0	0	0	0	0	0	0	0	0	0	0	0	0	0	1	0	0	0	0	0	0	0	0	0	0	0	0	0	0
MAG251	0	0	0	1	0	0	1	3	0	0	1	0	0	0	1	0	0	0	0	0	0	0	0	0	0	0	0	0	0	2	0	0	0	0	0	1	0	0	0	0	0	0	0	0
MAG252	0	0	1	0	0	0	0	1	0	0	1	0	0	0	1	0	0	0	0	0	0	0	0	0	0	0	0	0	0	1	0	0	0	0	0	0	0	0	0	0	0	0	0	0
MAG253	0	0	0	1	0	0	0	1	0	0	0	0	0	0	0	0	0	0	0	0	0	0	0	0	0	0	0	0	0	0	0	0	0	0	0	0	0	0	0	0	0	0	0	0
MAG254	0	0	0	0	0	1	0	1	0	0	0	0	0	1	1	0	0	1	0	0	0	0	0	0	0	0	0	0	0	2	0	0	0	0	0	0	0	0	0	0	0	0	0	0
MAG255	0	0	0	0	0	1	0	1	0	0	0	0	0	0	0	0	0	0	0	0	0	0	0	0	0	0	0	0	0	0	0	0	0	0	0	0	0	0	0	0	0	0	0	0
MAG256	1	0	0	0	0	1	0	1	0	0	0	0	0	0	1	0	0	0	0	0	0	1	0	0	0	0	0	0	0	0	0	0	0	0	0	0	0	0	0	0	0	0	0	0
MAG257	0	0	0	0	0	0	0	0	0	0	0	0	0	0	0	0	0	0	0	2	0	0	0	0	0	0	0	0	0	0	0	0	0	1	1	0	0	0	0	0	0	0	0	0
MAG258	0	0	0	0	0	1	0	0	0	0	0	0	0	0	0	0	1	0	0	0	0	0	0	0	0	0	0	0	0	1	0	0	0	0	0	0	0	0	0	0	0	0	0	0
MAG259	0	0	0	0	0	0	1	1	0	0	0	0	0	0	0	0	0	0	0	1	0	0	0	0	0	0	0	0	0	0	0	0	0	0	0	0	0	0	0	0	0	0	0	0
MAG26	0	0	0	0	0	1	0	1	0	1	1	0	0	0	0	0	0	0	0	0	0	0	0	0	0	0	0	0	0	1	0	0	0	0	0	0	0	0	0	0	0	0	0	0
MAG260	0	0	0	2	0	0	0	2	0	0	0	0	0	0	0	0	0	0	0	0	0	0	0	0	0	0	0	0	0	0	0	0	0	0	0	0	0	0	0	0	0	0	0	0
MAG261	0	0	0	0	0	0	1	0	0	0	0	0	0	0	0	0	0	0	0	0	0	0	0	0	1	0	0	0	0	0	0	0	2	0	0	0	0	0	0	0	0	0	0	0
MAG262	1	1	0	1	0	1	1	1	0	0	0	0	0	0	0	0	0	0	0	1	0	0	0	0	0	0	0	0	0	0	0	0	0	0	0	0	0	0	0	0	0	0	0	0
MAG263	0	0	0	0	0	1	0	1	0	1	0	0	0	0	0	0	0	0	0	0	0	0	0	0	0	0	0	0	0	0	0	0	0	0	0	0	0	0	0	0	0	0	0	0
MAG264	1	2	0	1	0	0	1	1	0	0	0	0	0	1	1	1	0	0	0	0	0	0	0	0	0	0	0	0	0	0	0	0	0	0	0	0	0	0	0	0	0	0	0	0
MAG265	0	0	0	0	0	0	0	1	0	0	1	0	0	0	0	0	0	0	0	0	0	0	0	0	0	0	0	0	0	2	0	0	0	0	0	0	0	0	0	0	0	0	0	0
MAG267	0	0	0	0	0	2	0	1	0	0	0	0	0	0	0	0	0	0	0	0	0	0	0	0	0	0	0	0	0	0	0	0	0	0	0	0	0	0	0	0	0	0	0	0
MAG269	0	0	0	0	1	2	0	0	0	1	0	0	0	0	0	0	0	0	0	0	0	0	0	0	0	0	0	0	0	0	0	0	0	0	0	0	0	0	0	0	0	0	0	0
MAG27	0	0	0	0	0	1	0	0	0	1	0	0	0	0	0	0	0	0	0	0	0	0	0	0	0	0	0	0	0	0	0	0	0	0	0	0	0	0	0	0	0	0	0	0
MAG270	0	0	0	0	0	1	0	1	0	0	0	0	0	0	1	0	1	0	0	0	0	0	0	0	0	0	0	0	0	0	0	0	0	0	0	0	0	0	0	0	0	0	0	0
MAG272	0	0	0	1	0	0	0	1	0	0	0	0	0	0	0	0	0	0	0	1	0	0	0	0	0	0	0	0	0	0	0	0	0	0	0	0	0	0	0	0	0	0	0	0
MAG273	0	0	0	0	0	1	1	1	0	0	0	0	0	0	0	0	0	0	0	0	0	0	0	0	0	0	0	0	0	0	0	0	0	0	0	0	0	0	0	0	0	0	0	0
MAG274	0	0	0	0	0	2	0	0	0	1	0	0	0	0	0	0	0	0	0	0	0	0	0	0	0	0	0	0	0	0	0	0	0	0	0	0	0	0	0	0	0	0	0	0
MAG275	0	0	0	0	0	0	0	1	0	0	0	0	0	0	1	0	0	0	0	0	0	0	0	0	0	0	0	0	0	0	0	0	0	0	0	0	0	0	0	0	0	0	0	0
MAG276	0	0	0	0	0	0	1	1	2	0	0	0	0	0	0	0	0	0	0	0	0	0	0	0	0	0	0	0	0	0	0	0	0	0	0	0	0	0	0	0	0	0	0	0
MAG278	0	0	0	0	0	0	0	2	0	0	0	0	0	0	1	0	0	0	0	0	0	0	0	0	0	0	0	0	0	0	0	0	0	0	0	0	0	0	0	0	0	0	0	0
MAG279	0	0	0	1	0	0	0	1	0	0	0	0	0	0	0	0	0	0	0	0	0	0	0	0	0	0	0	0	0	0	0	0	0	0	0	0	0	0	0	0	0	0	0	0
MAG28	0	0	0	0	0	0	0	2	0	1	0	0	0	0	0	0	0	0	0	0	0	0	0	0	0	0	0	0	0	0	0	0	0	0	0	0	0	0	0	0	0	0	0	0
MAG280	0	0	0	0	0	0	0	1	0	1	0	0	0	0	0	0	0	0	0	0	0	0	0	0	0	0	0	0	0	0	0	0	0	0	0	0	0	0	0	0	0	0	0	0
MAG281	0	0	0	0	0	0	0	1	0	0	0	0	0	0	0	0	0	0	0	0	0	0	0	0	0	0	0	0	0	0	0	0	0	0	0	0	0	0	0	0	0	0	0	0
MAG282	0	0	0	0	0	0	0	1	1	0	0	0	1	0	0	0	0	0	0	0	1	0	0	0	0	0	0	0	0	0	0	0	0	0	0	0	0	0	0	0	0	0	0	0
MAG283	0	0	0	1	0	0	0	0	0	0	1	0	0	0	0	0	0	0	0	0	0	0	0	0	0	0	0	0	0	1	0	0	0	0	0	0	0	0	0	0	0	0	0	0
MAG284	0	0	0	0	0	1	0	1	0	1	0	0	0	0	0	0	0	0	0	0	0	0	0	0	0	0	0	0	0	0	0	0	0	0	0	0	0	0	0	0	0	0	0	0
MAG285	0	0	0	0	0	2	0	1	0	1	0	0	0	0	0	0	0	0	0	0	0	0	0	0	0	0	0	0	0	0	0	0	0	0	0	0	0	0	0	0	0	0	0	0
MAG286	0	0	0	0	0	0	0	1	0	0	0	0	0	0	0	0	0	0	0	0	0	0	0	0	0	0	0	0	0	0	0	0	0	0	0	0	0	0	0	0	0	0	0	0
MAG287	0	0	0	0	0	0	0	0	0	0	0	0	0	0	1	0	0	0	0	0	0	0	0	0	0	0	0	0	0	0	0	0	0	0	0	0	0	0	0	0	0	0	0	0
MAG288	0	0	0	1	0	0	0	0	0	0	0	0	0	0	0	0	0	0	0	0	0	0	0	0	0	0	0	0	0	1	0	0	0	0	0	0	0	0	0	0	0	0	0	0
MAG289	0	0	0	0	0	1	0	0	0	0	2	0	0	0	0	0	0	0	0	0	0	0	0	0	0	0	0	0	0	1	0	0	0	0	0	0	0	0	0	0	0	0	0	0
MAG29	0	0	0	2	0	1	1	2	0	0	1	0	0	0	0	0	2	0	0	0	0	0	0	0	0	0	0	0	0	1	0	0	0	0	0	0	0	0	0	0	0	0	0	0
MAG290	0	0	0	0	0	0	0	0	0	0	0	0	0	0	1	0	0	0	0	0	0	0	0	0	0	0	0	0	0	0	0	0	0	0	0	0	0	0	0	0	0	0	0	0
MAG291	0	0	0	1	0	0	0	0	0	0	0	0	0	0	0	0	1	0	0	0	0	0	0	0	0	0	0	0	0	0	0	0	0	0	0	0	0	0	0	0	0	0	0	0
MAG292	0	0	1	1	0	1	1	1	0	0	0	0	0	0	0	0	0	0	0	0	0	0	0	0	0	0	0	0	0	0	0	0	0	0	0	0	0	0	0	0	0	0	0	0
MAG293	0	0	0	0	0	0	0	0	0	0	1	0	0	0	0	0	0	0	0	0	0	0	0	0	0	0	0	0	0	1	0	0	0	0	0	0	0	0	0	0	0	0	0	0
MAG294	0	0	0	0	0	1	0	0	0	0	0	0	0	0	0	0	1	0	0	0	0	0	0	0	0	0	0	0	0	1	0	0	0	0	0	0	0	0	0	0	0	0	0	0
MAG295	0	1	0	0	0	0	0	0	0	0	0	0	0	1	0	0	0	0	0	0	0	0	0	0	0	0	0	0	0	1	0	0	0	0	0	0	0	0	0	0	0	0	0	0
MAG296	0	0	0	0	0	0	0	1	0	0	0	0	0	0	1	0	0	0	0	0	0	0	0	0	0	0	0	0	0	0	0	0	0	0	0	1	0	0	0	0	0	0	0	0
MAG297	0	0	0	0	0	2	0	0	0	0	1	0	0	1	0	0	0	0	0	0	0	0	0	0	0	0	0	0	0	1	0	0	0	0	0	0	0	0	0	0	0	0	0	0
MAG298	0	0	0	0	0	1	0	0	0	0	1	0	0	0	0	1	0	0	0	0	0	0	0	0	0	0	0	0	0	3	0	0	0	0	0	0	0	0	0	0	0	0	0	0
MAG299	0	0	0	0	0	1	1	0	0	1	0	0	0	0	0	0	0	0	0	0	0	0	0	0	0	0	0	0	0	0	0	0	0	0	0	0	0	0	0	1	0	0	0	0
MAG3	0	0	0	0	0	2	0	1	0	1	0	0	0	0	0	0	0	0	0	0	0	0	0	0	0	0	0	0	0	0	0	0	0	0	0	0	0	0	0	0	0	0	0	0
MAG30	0	0	0	1	0	0	0	1	0	0	1	0	0	0	0	0	0	0	0	0	0	0	0	0	0	0	0	0	0	1	0	0	0	0	0	0	0	0	0	0	0	0	0	0
MAG300	0	0	0	0	0	2	0	0	0	0	0	0	0	0	0	0	0	0	0	0	0	0	0	0	0	0	0	0	0	0	0	0	0	0	0	0	0	0	0	0	0	0	0	0
MAG302	0	0	0	0	0	1	0	1	0	2	0	0	0	0	0	0	0	0	0	0	0	0	0	0	0	0	0	0	0	0	0	0	0	0	0	0	0	0	0	0	0	0	0	0
MAG303	0	1	0	1	0	1	1	2	0	0	0	0	0	0	1	0	0	0	0	0	0	1	0	0	0	0	0	0	0	0	0	0	0	0	0	0	0	0	0	0	0	0	0	0
MAG304	0	0	0	0	0	1	0	0	0	1	0	0	0	0	0	0	0	0	0	0	0	0	0	0	0	0	0	0	0	0	0	0	0	0	0	0	0	0	0	0	0	0	0	0
MAG305	0	0	0	0	0	0	0	0	0	0	0	0	0	0	0	0	0	0	0	0	0	0	0	0	0	0	0	0	0	0	0	0	0	0	0	0	0	0	0	0	0	0	0	0
MAG306	0	0	0	0	0	1	0	1	0	0	0	0	0	0	0	0	0	0	0	0	0	0	0	0	0	0	0	0	0	1	0	0	0	0	0	0	0	0	0	0	0	0	0	0
MAG307	0	2	0	2	0	1	1	2	0	0	0	0	0	1	1	0	0	0	0	1	0	0	0	0	0	0	0	0	0	0	0	0	0	0	0	0	0	0	0	0	0	0	0	0
MAG308	0	0	0	0	0	1	1	2	0	0	0	0	0	0	1	0	1	0	0	1	0	0	0	0	0	0	0	0	0	0	0	0	0	0	0	0	0	0	0	0	0	0	0	0
MAG309	1	1	0	0	1	1	0	1	0	0	0	0	0	0	0	0	0	0	0	0	0	0	0	0	0	0	0	0	0	0	0	0	0	0	0	0	0	0	0	0	0	0	0	0
MAG31	0	0	0	0	0	1	1	1	0	1	0	0	0	0	0	0	0	0	0	0	0	0	0	0	0	0	0	0	0	0	0	0	0	0	0	0	0	0	0	0	0	0	0	0
MAG310	0	0	0	0	0	2	0	0	0	0	0	0	0	0	0	0	0	0	0	0	0	0	0	0	0	0	0	0	0	1	0	0	0	0	0	0	0	0	0	0	0	0	0	0
MAG311	1	1	0	0	0	0	0	1	0	1	1	0	0	0	0	0	0	0	0	0	0	0	0	0	0	0	0	0	0	1	0	0	0	0	0	0	0	0	0	0	0	0	0	0
MAG312	0	0	0	0	0	0	1	2	0	0	0	0	0	0	1	0	0	0	0	0	0	0	0	0	0	0	0	0	0	0	0	0	0	0	0	0	0	0	0	0	0	0	0	0
MAG313	1	1	0	0	0	1	1	2	0	0	0	0	0	1	1	0	1	0	0	1	0	0	0	0	0	0	0	0	0	0	0	0	0	0	0	0	0	0	0	0	0	0	0	0
MAG314	0	0	0	0	0	1	0	2	0	1	0	0	0	0	0	0	0	0	0	0	0	0	0	0	0	0	0	0	0	0	0	0	0	0	0	0	0	0	0	0	0	0	0	0
MAG315	0	0	1	0	0	1	0	1	0	0	0	0	0	0	0	0	1	0	0	0	0	0	0	0	0	0	0	0	0	0	0	0	0	0	0	0	0	0	0	0	0	0	0	0
MAG316	0	0	0	0	0	1	0	1	0	1	0	0	0	0	0	0	0	0	0	0	0	0	0	0	0	0	0	0	0	0	0	0	0	0	0	0	0	0	0	0	0	0	0	0
MAG317	0	0	0	0	0	3	1	1	0	1	0	0	0	0	0	0	0	0	0	0	0	0	0	0	0	0	0	0	0	0	0	0	0	0	0	0	0	0	0	0	0	0	0	0
MAG318	0	0	0	0	0	1	0	1	0	0	1	0	0	0	0	0	0	0	0	0	0	0	0	0	0	0	0	0	0	2	0	0	0	0	0	0	0	0	0	0	0	0	0	0
MAG319	0	0	1	0	0	0	1	1	0	0	0	0	0	0	1	0	0	0	0	0	0	0	0	0	0	0	0	0	0	0	0	0	0	0	0	0	0	0	0	0	0	0	0	0
MAG32	0	0	0	2	0	1	1	2	0	0	0	0	0	0	2	0	0	0	0	0	0	0	0	0	0	0	0	0	0	0	0	0	0	0	0	0	0	0	0	0	1	0	0	0
MAG320	0	0	0	0	1	0	0	1	0	0	1	0	1	0	0	0	0	0	0	0	0	0	0	0	0	0	0	0	0	1	0	0	0	1	0	0	0	0	0	0	1	0	0	0
MAG321	0	0	0	0	0	1	0	0	0	0	0	0	0	0	0	0	0	0	0	0	0	0	0	0	0	0	0	0	0	0	0	0	0	0	0	0	0	0	0	0	0	0	0	0
MAG322	0	0	0	1	0	1	1	1	0	0	1	0	0	0	1	0	0	0	0	0	0	0	0	0	0	0	0	0	0	1	0	0	0	0	0	0	0	0	0	0	0	0	0	0
MAG323	0	0	0	0	0	0	0	0	0	0	0	0	0	1	0	0	0	0	0	0	0	0	0	0	0	0	0	0	0	1	0	0	0	0	0	0	0	0	0	0	0	0	0	0
MAG324	0	0	0	0	0	2	0	0	0	0	0	0	0	0	0	0	0	0	0	0	0	0	0	0	0	0	0	0	0	0	0	0	0	0	0	0	0	0	0	0	0	0	0	0
MAG325	0	0	0	0	0	1	0	1	0	0	0	0	0	0	1	0	0	0	0	0	0	0	0	0	0	0	0	0	0	1	0	0	0	0	0	0	0	0	0	0	0	0	0	0
MAG326	0	0	0	1	0	1	0	1	0	0	1	0	0	0	0	0	0	0	0	0	0	0	0	0	0	0	0	0	0	1	0	0	0	0	0	0	0	0	0	0	0	0	0	0
MAG327	0	0	0	0	0	0	0	0	0	0	1	0	0	0	0	0	0	0	0	0	0	0	0	0	0	0	0	0	0	1	0	0	0	0	0	0	0	0	0	0	0	0	0	0
MAG328	0	0	0	0	0	0	0	1	0	0	0	0	0	0	0	0	1	0	0	0	0	0	0	0	0	0	0	0	0	0	0	0	0	0	0	0	0	0	0	0	0	0	0	0
MAG329	0	0	0	0	0	1	0	1	0	0	0	0	0	0	0	0	0	0	0	0	0	0	0	0	0	0	0	0	0	0	0	0	0	0	0	0	0	0	0	0	0	0	0	0
MAG33	1	1	0	0	0	1	0	1	0	0	1	0	0	0	1	0	0	0	0	0	0	0	0	0	0	0	0	0	0	1	0	0	0	0	0	0	0	0	0	0	0	0	0	0
MAG330	0	1	0	2	0	1	1	2	0	0	0	0	1	0	1	0	0	0	0	1	0	0	0	0	0	0	0	0	0	0	0	0	0	0	0	0	0	0	0	0	0	1	0	0
MAG331	1	0	0	0	1	0	0	0	0	1	1	0	0	0	1	0	0	0	0	0	0	0	0	0	0	0	0	0	0	1	0	0	0	0	0	0	0	0	0	0	0	0	0	0
MAG332	0	0	0	0	1	0	0	0	0	0	0	0	0	0	0	0	0	0	0	0	0	0	0	0	0	0	0	0	0	0	0	0	0	0	0	0	0	0	0	0	0	0	0	0
MAG333	0	0	0	1	0	1	0	1	0	0	0	0	0	0	0	0	0	0	0	0	0	0	0	0	0	0	0	0	0	1	0	0	0	0	0	0	0	0	0	0	0	0	0	0
MAG334	0	0	0	1	0	0	0	1	0	0	1	0	0	0	0	0	0	0	0	0	0	0	0	0	0	0	0	0	0	1	0	0	0	0	0	0	0	0	0	0	0	0	0	0
MAG335	0	0	0	0	0	1	0	1	0	1	0	0	0	0	0	0	0	0	0	0	0	0	0	0	0	0	0	0	0	0	0	0	0	0	0	0	0	0	0	0	0	0	0	0
MAG336	0	0	0	0	0	1	0	0	0	0	1	0	0	0	0	0	0	0	0	0	0	0	0	0	0	0	0	0	0	1	0	0	0	0	0	0	0	0	0	0	0	0	0	0
MAG337	0	0	0	0	0	1	0	0	0	0	0	0	0	0	0	0	0	0	0	0	0	0	0	0	0	0	0	0	0	0	0	0	0	0	0	0	0	0	0	0	0	0	0	0
MAG338	0	0	0	0	0	1	0	0	1	0	0	0	0	0	0	0	0	0	0	0	0	0	0	0	0	0	0	0	0	0	0	0	0	0	0	0	0	0	0	0	0	0	0	0
MAG339	0	0	0	1	0	1	0	2	0	0	0	0	0	1	1	0	0	0	0	0	0	0	0	0	0	0	0	0	0	0	0	0	0	0	0	1	0	0	0	0	0	0	0	0
MAG34	0	0	0	0	1	1	0	1	1	0	0	0	0	0	0	0	0	0	0	0	0	0	0	0	0	0	0	1	0	0	0	0	0	0	0	0	0	0	0	1	0	0	0	0
MAG340	0	0	0	0	0	1	1	1	0	0	0	0	0	1	0	0	0	0	0	0	0	0	0	0	0	0	0	0	0	0	0	0	0	1	0	0	1	0	0	0	0	0	0	0
MAG341	0	0	0	0	0	1	0	0	0	0	0	0	0	0	0	0	0	0	0	0	0	0	0	0	0	0	0	0	0	0	0	0	0	0	0	0	0	0	0	0	0	0	0	0
MAG342	0	0	0	0	0	0	1	2	0	0	1	0	0	0	0	1	0	0	0	0	0	0	0	0	0	0	0	0	0	0	0	0	0	0	0	0	0	0	0	0	0	0	0	0
MAG343	0	1	0	0	0	1	0	1	0	0	0	0	0	0	0	0	0	0	0	0	0	0	0	0	0	0	0	0	0	0	0	0	0	0	0	0	0	0	0	0	0	0	0	0
MAG344	1	0	0	0	0	1	0	0	0	0	0	0	0	0	0	0	0	0	0	0	0	0	0	0	0	0	0	0	0	0	0	0	0	0	0	0	0	0	0	0	1	0	0	0
MAG345	0	0	0	0	0	1	0	0	0	0	0	0	0	0	0	0	0	0	0	0	0	0	0	0	0	0	0	0	0	0	0	0	0	0	0	0	0	0	0	0	0	0	0	0
MAG346	0	0	0	0	0	1	0	1	0	0	0	0	0	1	0	0	0	0	0	0	0	0	0	0	0	0	0	0	0	0	0	0	0	0	0	0	0	0	0	0	0	0	0	0
MAG347	0	0	0	0	0	2	0	1	0	1	0	0	0	0	0	0	0	0	0	0	0	0	0	0	0	0	0	0	0	0	0	0	0	0	0	0	0	0	0	0	0	0	0	0
MAG348	2	0	0	0	0	1	0	0	0	0	0	0	0	0	0	0	0	0	0	0	0	0	0	0	0	0	0	0	0	0	0	0	0	0	0	0	0	0	0	0	0	0	0	0
MAG349	0	0	0	0	0	0	1	1	0	0	0	0	0	0	1	0	0	0	0	0	0	0	0	0	0	0	0	0	0	0	0	0	0	0	0	0	0	0	0	0	0	0	0	0
MAG35	0	0	0	0	0	1	1	1	0	1	0	0	0	0	0	0	0	0	0	0	0	0	0	0	0	0	0	0	0	0	0	0	0	0	0	0	0	0	0	0	0	0	0	0
MAG350	0	0	0	1	0	0	0	0	0	0	0	0	0	0	0	0	0	0	0	0	0	0	0	0	0	0	0	0	0	0	0	0	0	0	0	0	0	0	0	0	0	0	0	0
MAG351	0	0	0	1	0	0	0	0	0	0	0	0	0	0	0	0	0	0	0	0	0	0	0	0	0	0	0	0	0	0	0	0	0	0	0	0	0	0	0	0	0	0	0	0
MAG352	1	1	0	0	0	1	0	2	0	0	1	0	0	1	0	0	0	0	0	0	0	0	0	0	0	0	0	0	0	1	0	0	0	0	0	0	0	0	0	0	0	0	0	0
MAG353	0	0	0	0	0	1	0	0	0	0	0	0	0	0	0	0	1	0	0	0	0	0	0	0	0	0	0	0	0	0	0	0	0	0	0	0	0	0	0	0	0	0	0	0
MAG354	0	0	0	0	1	0	0	1	0	1	0	0	0	0	0	0	0	0	0	0	0	0	0	0	0	0	0	0	0	0	0	0	0	1	1	0	0	0	0	0	0	0	0	0
MAG355	1	0	0	0	0	0	0	0	0	0	0	0	0	0	1	0	0	0	0	1	0	0	0	0	0	0	0	0	0	0	0	0	0	0	0	0	0	0	0	0	0	0	0	0
MAG356	0	1	0	1	0	0	1	2	0	0	0	0	0	0	0	0	0	0	0	0	0	0	0	0	0	0	0	0	0	0	0	0	0	0	0	1	0	0	0	0	0	0	0	0
MAG357	0	0	0	0	0	2	0	0	0	0	0	0	0	0	0	0	0	0	0	0	0	0	0	0	0	0	0	0	0	1	0	0	0	0	0	0	0	0	0	0	0	0	0	0
MAG358	0	0	0	0	0	1	0	0	0	0	1	0	0	0	0	0	0	0	0	0	0	0	0	0	0	0	0	0	0	1	0	0	0	0	0	0	0	0	0	0	0	0	0	0
MAG359	0	1	0	1	0	1	0	0	0	0	0	0	0	0	0	0	0	0	0	0	0	1	0	0	0	0	0	0	0	0	0	0	0	0	0	0	0	0	0	0	0	0	0	0
MAG36	0	0	0	1	0	1	1	1	0	0	1	0	0	0	0	1	0	0	0	0	0	0	0	0	0	0	0	0	0	2	0	0	0	0	0	0	0	0	0	0	0	0	0	0
MAG360	0	0	0	0	0	0	0	1	0	1	0	0	0	0	0	0	0	0	0	0	0	0	0	0	0	0	0	0	0	0	0	0	0	0	0	0	0	0	0	0	0	0	0	0
MAG361	0	0	0	0	0	0	0	0	0	0	0	0	0	0	1	0	0	0	0	0	0	0	0	0	0	0	0	0	0	0	0	0	0	0	0	0	0	0	0	0	0	0	0	0
MAG362	0	0	0	0	0	2	0	0	0	1	0	0	0	0	0	0	0	0	0	0	0	0	0	0	0	0	0	0	0	0	0	0	0	0	0	0	0	0	0	1	0	0	0	0
MAG363	0	0	1	0	0	1	0	0	0	0	1	0	0	0	1	0	0	0	0	0	0	0	0	0	0	0	0	0	0	1	0	0	0	0	0	0	0	0	0	0	0	0	0	0
MAG364	0	0	0	2	0	0	0	2	0	0	0	0	0	1	1	0	0	0	0	0	0	0	0	0	0	0	0	0	0	0	0	0	0	0	0	0	0	0	0	0	0	0	0	0
MAG365	0	0	0	0	0	2	0	0	0	1	0	0	0	0	0	0	0	0	0	0	0	0	0	0	0	0	0	0	0	0	0	0	0	0	0	0	0	0	0	0	0	0	0	0
MAG366	0	0	0	0	0	1	1	2	0	0	0	0	0	0	1	0	0	0	0	0	0	0	0	0	0	0	0	0	0	0	0	0	0	0	0	0	0	0	0	0	0	0	0	0
MAG367	0	0	0	0	0	1	0	0	0	1	0	0	0	0	0	0	0	0	0	0	0	0	0	0	0	0	0	0	0	0	0	0	0	0	0	0	0	0	0	0	0	0	0	0
MAG369	0	0	0	2	0	1	0	0	0	0	0	0	0	0	1	0	0	1	0	0	0	0	0	0	0	0	0	0	0	0	0	0	0	0	0	0	0	0	0	0	0	0	0	0
MAG37	0	0	0	0	0	1	0	1	0	1	1	0	0	0	0	0	0	0	0	0	0	0	0	0	0	0	0	0	0	1	0	0	0	0	0	0	0	0	0	0	0	0	0	0
MAG370	2	1	0	0	0	0	0	2	0	0	0	0	0	0	1	0	0	0	0	0	0	0	0	0	0	0	0	0	0	0	0	0	0	0	0	0	0	0	0	0	1	1	0	0
MAG371	0	0	0	2	0	0	1	1	0	0	1	0	0	0	0	0	1	0	0	0	0	0	0	0	0	0	0	0	0	0	0	0	0	0	0	0	0	0	0	0	0	0	0	0
MAG372	0	0	0	0	0	1	0	1	0	0	0	0	0	0	0	0	0	0	0	0	0	0	0	0	0	0	0	0	0	0	0	0	0	0	0	0	0	0	0	0	0	0	0	0
MAG373	0	0	0	0	0	1	0	0	0	1	0	0	0	0	0	0	0	0	0	0	0	0	0	0	0	0	0	0	0	0	0	0	0	0	0	0	0	0	0	0	0	0	0	0
MAG374	1	1	0	0	0	0	0	1	0	0	0	0	0	0	0	0	0	0	0	0	0	0	0	0	0	0	0	0	0	0	0	0	0	0	0	0	0	0	0	0	0	0	0	0
MAG375	0	0	0	0	0	0	0	0	0	0	0	0	0	0	0	0	0	0	0	0	0	0	0	0	0	0	0	0	0	1	0	0	0	0	0	0	0	0	0	0	0	0	0	0
MAG376	0	0	0	0	0	1	0	0	0	1	0	0	0	0	0	0	0	0	1	0	0	0	0	0	0	0	0	0	0	0	0	0	0	0	0	0	0	0	0	1	0	1	1	0
MAG377	0	0	1	1	0	1	1	2	0	0	1	0	0	0	0	0	0	0	0	0	0	0	0	0	0	0	0	0	0	1	0	0	0	0	0	0	0	0	0	0	0	0	0	0
MAG378	0	0	0	0	0	0	0	1	0	0	1	0	0	0	0	0	0	0	0	0	0	0	0	0	0	0	0	0	0	0	0	0	0	0	0	0	0	0	0	0	0	0	0	0
MAG379	0	0	0	0	0	1	0	1	0	0	0	0	0	0	0	0	0	0	0	0	0	0	0	0	0	0	0	0	0	0	0	0	0	0	0	0	0	0	0	0	0	0	0	0
MAG38	0	0	0	0	0	0	0	1	0	0	0	0	0	0	0	0	0	0	0	0	0	0	0	0	0	0	0	0	0	1	0	0	0	0	0	0	0	0	0	0	0	0	0	0
MAG381	0	0	0	1	0	1	0	2	0	0	0	0	0	0	0	0	0	0	0	0	0	0	0	0	0	0	0	0	0	0	0	0	0	0	0	0	0	0	0	0	0	0	0	0
MAG382	0	0	0	0	0	0	0	0	0	0	0	0	0	0	0	0	1	0	0	0	0	0	0	0	0	0	0	0	0	0	0	0	0	0	0	0	0	0	0	0	0	0	0	0
MAG383	0	0	0	1	0	0	0	1	0	0	0	0	0	0	0	0	0	0	0	0	0	0	0	0	0	0	0	0	0	0	0	0	0	0	0	0	0	0	0	0	0	0	0	0
MAG384	0	0	0	0	0	1	0	1	0	0	0	0	0	0	0	0	0	0	0	0	0	0	0	0	0	0	0	0	0	0	0	0	0	0	0	0	0	0	0	0	0	0	0	0
MAG385	0	0	0	0	0	1	0	0	0	0	0	0	0	0	0	0	0	0	0	0	0	0	0	0	0	0	0	0	0	0	0	0	0	0	0	0	0	0	0	0	0	0	0	0
MAG386	0	1	0	0	0	0	1	2	0	0	0	0	0	0	1	0	0	0	0	1	0	0	0	0	0	0	0	0	0	0	0	0	0	0	0	0	0	0	0	0	0	0	0	0
MAG387	0	0	1	1	0	0	1	2	0	0	0	0	0	0	0	0	0	0	0	0	0	0	0	0	0	0	0	0	0	0	0	0	0	0	0	0	0	0	0	0	0	0	0	0
MAG388	0	0	0	0	0	0	0	0	0	0	1	0	0	0	0	0	0	0	0	0	0	0	0	0	0	0	0	0	0	1	0	0	0	0	0	0	0	0	0	0	0	0	0	0
MAG389	0	0	0	0	0	2	0	1	0	1	0	0	0	0	0	0	0	0	0	0	0	0	0	0	0	0	0	0	0	0	0	0	0	0	0	0	0	0	0	1	0	0	0	0
MAG39	0	0	0	0	0	2	1	1	0	1	0	0	0	0	0	0	0	0	0	0	0	0	0	0	0	0	0	0	0	0	0	0	0	0	0	0	0	0	0	0	0	0	0	0
MAG390	0	0	0	0	0	1	0	0	0	0	0	0	0	0	0	0	0	0	0	0	0	0	0	0	0	0	0	0	0	0	0	0	0	0	0	0	0	0	0	0	0	0	0	0
MAG391	0	0	0	0	0	1	0	1	0	0	0	0	0	0	0	0	0	0	0	0	0	0	0	0	0	0	0	0	0	0	0	0	0	0	0	0	0	0	0	0	0	0	0	0
MAG392	0	0	0	0	0	0	0	1	0	0	0	0	0	0	0	0	0	0	0	0	0	0	0	0	0	0	0	0	0	0	0	0	0	0	0	0	0	0	0	0	0	0	0	0
MAG393	0	0	0	0	0	0	0	0	0	0	0	0	0	0	1	0	0	0	0	0	0	0	0	0	0	0	0	0	0	0	0	0	0	0	0	0	0	0	0	0	0	0	0	0
MAG394	0	0	0	0	0	1	0	0	0	1	0	0	0	0	0	0	0	0	0	0	0	0	0	0	0	0	0	0	0	0	0	0	0	0	0	0	0	0	0	0	0	0	0	0
MAG395	0	0	0	1	0	1	0	0	0	0	0	0	0	0	0	0	0	0	0	0	0	0	0	0	0	0	0	0	0	0	0	0	0	0	0	0	0	0	0	0	0	0	0	0
MAG396	0	0	0	0	0	1	0	0	0	0	0	0	0	0	0	0	0	0	0	0	0	0	0	0	0	0	0	0	0	0	0	0	0	0	0	0	0	0	0	0	0	0	0	0
MAG397	0	0	0	0	0	0	0	1	0	0	1	0	0	0	1	0	0	0	0	0	0	0	0	0	0	0	0	0	0	1	0	0	0	0	0	0	0	0	0	0	0	0	0	0
MAG398	0	0	0	1	0	0	0	0	0	0	1	0	0	0	0	0	0	0	0	0	0	0	0	0	0	0	0	0	0	1	0	0	0	0	0	0	0	0	0	0	0	0	0	0
MAG399	0	0	0	0	0	0	0	0	0	1	0	0	0	0	0	0	0	0	0	0	0	0	0	0	0	0	1	0	0	0	1	0	2	0	0	0	0	0	0	0	0	0	0	0
MAG4	0	0	0	0	0	1	0	1	0	2	0	0	0	0	0	0	0	0	0	0	0	0	0	0	0	0	0	0	0	0	0	0	0	0	0	0	0	0	0	0	0	0	0	0
MAG40	0	0	0	0	0	2	1	1	0	1	0	0	0	0	0	0	0	0	0	0	0	0	0	0	0	0	0	0	0	0	0	0	0	0	0	0	0	0	0	0	0	0	0	0
MAG400	0	0	0	0	0	0	0	1	0	0	1	0	0	0	0	0	0	0	0	0	0	0	0	0	0	0	0	0	0	1	0	0	0	1	1	0	1	0	0	0	0	0	0	0
MAG401	0	0	0	0	0	1	1	1	0	0	1	0	0	0	0	0	0	0	0	0	0	0	0	0	0	0	0	0	0	1	0	0	0	0	0	0	0	0	0	0	0	0	0	0
MAG402	0	0	0	0	0	1	0	0	0	0	0	1	0	1	0	0	0	0	0	0	0	0	0	0	0	0	0	0	0	0	0	0	0	0	0	0	0	0	0	0	0	0	0	0
MAG403	0	0	0	0	0	2	1	1	0	0	0	0	0	0	0	0	0	0	0	0	0	0	0	0	0	0	0	0	0	0	0	0	0	0	0	0	0	0	0	0	0	0	0	0
MAG404	0	0	0	0	0	1	0	1	0	0	3	0	0	0	0	0	0	0	0	0	0	0	0	0	0	0	0	0	0	2	0	0	0	0	0	0	0	0	0	0	0	0	0	0
MAG405	0	0	0	0	0	0	0	0	0	0	0	0	0	0	0	0	0	0	0	0	0	0	0	0	0	0	0	0	0	0	0	0	0	0	0	0	0	0	0	0	0	0	0	0
MAG406	0	0	0	0	0	0	0	0	0	0	0	0	0	0	0	1	0	0	0	0	0	0	0	0	0	0	0	0	0	1	0	0	0	0	0	0	0	0	0	0	0	0	0	0
MAG407	0	0	0	0	0	1	0	0	0	0	0	0	0	0	0	0	0	0	0	0	0	0	0	0	0	0	0	0	0	0	0	0	0	0	0	0	0	0	0	0	0	0	0	0
MAG408	0	0	0	0	0	2	0	0	0	0	0	0	0	0	0	0	0	0	0	0	0	0	0	0	0	0	0	0	0	0	0	0	0	0	0	0	0	0	0	0	0	0	0	0
MAG409	0	0	0	1	0	0	0	0	0	0	0	0	0	0	0	0	0	0	0	0	0	0	0	0	0	0	0	0	0	1	0	0	0	0	0	0	0	0	0	0	0	0	0	0
MAG41	1	1	0	1	0	1	1	2	0	0	0	0	0	0	1	0	0	0	0	0	0	0	0	0	0	0	0	0	0	0	0	0	0	0	0	0	0	0	0	0	0	0	0	0
MAG410	0	0	0	0	0	0	0	0	0	0	0	0	0	0	1	0	0	0	0	0	0	0	0	0	0	0	0	0	0	0	0	0	0	0	0	0	0	0	0	0	0	0	0	0
MAG411	0	0	0	0	0	1	0	0	0	0	0	0	0	0	0	0	0	0	0	0	0	0	0	0	0	0	0	0	0	0	0	0	0	0	0	0	0	0	0	0	0	0	0	0
MAG412	0	0	0	0	0	1	0	0	0	0	0	0	0	0	0	0	0	0	0	0	0	0	0	0	0	0	0	0	0	0	0	0	0	0	0	0	0	0	0	0	0	0	0	0
MAG413	0	0	0	0	0	2	0	0	0	1	0	0	0	0	0	0	0	0	0	0	0	0	0	0	0	0	0	0	0	0	0	0	0	0	0	0	0	0	0	0	0	0	0	0
MAG414	0	0	0	1	0	0	1	2	0	0	0	0	0	0	0	0	0	0	0	0	0	0	0	0	0	0	0	0	0	0	0	0	0	0	0	0	0	0	0	0	1	0	0	0
MAG415	0	0	0	0	0	0	0	0	0	0	1	0	0	0	1	0	1	1	0	0	0	0	0	0	0	0	0	0	0	1	0	0	0	1	1	0	0	0	0	0	0	0	0	0
MAG416	0	0	0	0	0	0	0	1	0	0	1	0	0	0	0	0	0	0	0	0	0	0	0	0	0	0	0	0	0	1	0	0	0	0	0	0	0	0	0	0	0	0	0	0
MAG417	0	0	0	0	0	0	0	0	0	0	0	0	0	0	1	0	0	0	0	0	0	0	0	0	0	0	0	0	0	0	0	0	0	0	0	0	0	0	0	0	0	0	0	0
MAG418	0	0	0	0	0	1	1	2	0	0	0	0	0	0	0	0	0	0	0	1	0	0	0	0	0	0	0	0	0	0	0	0	0	0	0	0	0	0	0	0	0	0	0	0
MAG419	0	0	0	0	0	1	0	1	0	0	0	0	0	0	0	0	0	0	0	0	0	0	0	0	0	0	0	0	0	0	0	0	0	0	0	0	0	0	0	0	0	0	0	0
MAG42	0	1	0	0	0	1	0	1	0	1	1	0	0	0	0	0	0	0	0	0	0	0	0	0	0	0	0	0	0	2	0	0	0	0	0	0	0	0	0	0	0	0	0	0
MAG420	1	0	0	0	0	0	0	1	0	0	1	0	0	0	0	0	0	0	0	0	0	0	0	0	0	0	0	0	0	0	0	0	0	0	0	0	0	0	0	0	0	0	0	0
MAG421	0	1	0	1	0	0	1	1	0	0	0	0	0	0	1	0	0	1	0	0	0	0	0	0	0	0	0	0	0	1	0	0	0	0	0	0	0	0	0	0	0	0	0	0
MAG422	0	0	1	1	0	1	1	2	0	0	0	0	0	0	1	0	1	0	0	0	0	0	0	0	0	0	0	0	0	0	0	0	0	0	0	0	0	0	0	0	0	0	0	0
MAG423	0	1	0	1	0	0	0	2	0	0	0	0	0	0	1	0	0	0	0	0	0	0	0	0	0	0	0	0	0	0	0	0	0	0	0	0	0	0	0	0	0	0	0	0
MAG424	0	0	0	1	0	0	0	0	0	0	0	0	0	0	1	0	0	0	0	0	0	0	0	0	0	0	0	0	0	0	0	0	0	0	0	0	0	0	0	0	0	0	0	0
MAG425	0	0	0	0	0	0	0	0	0	0	0	0	0	0	0	0	0	0	0	0	0	0	0	0	0	0	0	0	0	0	0	0	0	0	0	0	0	0	0	0	0	0	0	0
MAG426	0	0	0	0	0	1	1	1	0	0	0	0	0	0	0	0	0	0	0	0	0	0	0	0	0	0	0	0	0	0	0	0	0	0	0	0	0	0	0	0	0	0	0	0
MAG428	0	0	0	0	0	1	1	0	0	0	0	0	0	0	0	0	0	0	0	0	0	0	0	0	0	0	0	0	0	0	0	0	0	0	0	0	0	0	0	0	0	0	0	0
MAG429	0	0	0	0	0	1	0	0	0	0	0	0	0	0	1	0	1	0	0	0	0	0	0	0	0	0	0	0	0	0	0	0	0	0	0	0	0	0	0	0	0	0	0	0
MAG43	0	0	0	0	0	1	0	1	0	0	1	0	0	0	0	0	0	0	0	0	0	0	0	0	0	0	0	0	0	1	0	0	0	0	0	0	0	0	0	1	0	0	0	0
MAG430	0	0	0	0	0	1	0	1	0	0	0	0	0	0	0	0	0	0	0	0	0	0	0	0	0	0	0	0	0	0	0	0	0	0	0	0	0	0	0	0	0	0	0	0
MAG431	0	0	1	1	0	1	0	1	0	0	0	0	0	0	0	0	0	0	0	0	0	0	0	0	0	0	0	0	0	0	0	0	0	0	0	0	0	0	0	0	0	0	0	0
MAG432	0	0	0	0	0	0	0	1	0	0	0	0	0	0	0	0	0	0	0	0	0	0	0	0	0	0	0	0	0	0	0	0	0	0	0	0	0	0	0	0	0	0	0	0
MAG44	0	0	1	1	0	1	1	1	0	0	1	0	0	0	0	0	0	0	0	0	0	0	0	0	0	0	0	0	0	1	0	0	0	0	0	0	0	0	0	0	0	0	0	0
MAG45	0	0	0	0	0	1	0	0	0	1	0	0	0	0	0	0	0	0	0	0	0	0	0	0	0	0	0	0	0	0	0	0	0	0	0	0	0	0	0	0	0	0	0	0
MAG46	1	1	0	0	0	1	0	1	0	1	1	0	0	0	0	0	0	0	0	0	0	0	0	0	0	0	0	0	0	1	0	0	0	0	0	0	0	0	0	0	0	0	0	0
MAG47	0	0	0	0	0	2	1	1	0	1	0	0	0	0	0	0	0	0	0	0	0	0	0	0	0	0	0	0	0	0	0	0	0	0	0	0	0	0	0	0	0	0	0	0
MAG48	0	0	0	0	0	1	0	1	0	1	0	0	0	0	0	0	0	0	0	0	0	0	0	0	0	0	0	0	0	0	0	0	0	0	0	0	0	0	0	0	0	0	0	0
MAG49	0	0	0	0	0	2	1	2	0	1	0	0	0	0	0	0	0	0	0	0	0	0	0	0	0	0	0	0	0	0	0	0	0	0	0	0	0	0	0	0	0	0	0	0
MAG5	0	0	0	0	0	2	1	2	0	0	0	0	0	0	0	0	0	0	0	0	0	0	0	0	0	0	0	0	0	0	0	0	0	0	0	0	0	0	0	0	0	0	0	0
MAG50	0	0	0	0	0	0	0	1	0	0	1	0	0	0	0	0	0	0	0	0	0	0	0	0	0	0	0	0	0	1	0	0	0	0	0	0	0	0	0	0	0	0	0	0
MAG51	1	1	0	1	0	1	0	2	0	0	0	0	0	0	2	0	0	0	0	0	0	0	0	0	0	0	0	0	0	0	0	0	0	0	0	0	0	0	0	0	1	0	0	0
MAG52	0	0	0	0	0	2	0	0	0	1	0	0	0	0	0	0	0	0	0	0	0	0	0	0	0	0	0	0	0	0	0	0	0	0	0	0	0	0	0	0	0	0	0	0
MAG53	0	0	0	0	0	2	1	1	0	1	0	0	0	0	0	0	0	0	0	0	0	0	0	0	0	0	0	0	0	0	0	0	0	0	0	0	0	0	0	0	0	0	0	0
MAG54	0	0	0	0	0	1	0	1	0	0	1	0	0	0	0	0	0	0	0	0	0	0	0	0	0	0	0	0	0	1	0	0	0	0	0	0	0	0	0	0	0	0	0	0
MAG55	0	0	0	0	0	1	1	0	0	0	0	0	0	0	1	0	0	0	0	0	0	0	0	0	0	0	0	0	0	0	0	0	0	0	0	0	0	0	0	0	0	0	0	0
MAG56	0	0	0	0	0	3	0	1	0	1	1	0	0	0	0	0	0	0	0	0	0	0	0	0	0	0	0	0	0	1	0	0	0	0	0	0	0	0	0	0	0	0	0	0
MAG57	1	1	0	1	0	1	1	2	0	0	0	0	0	1	1	0	1	0	0	1	0	0	0	0	0	0	0	0	0	0	0	0	0	0	0	0	0	0	0	0	0	0	0	0
MAG58	1	2	0	0	0	0	0	1	0	0	0	0	0	1	2	1	0	0	0	0	0	0	0	0	0	0	0	0	0	0	0	0	0	0	0	0	0	0	0	0	0	1	0	0
MAG59	0	0	0	1	0	1	0	1	0	0	1	0	0	0	0	0	0	0	0	0	0	0	0	0	0	0	0	0	0	1	0	0	0	0	0	0	0	0	0	0	0	0	0	0
MAG6	0	0	0	0	0	0	0	1	0	0	1	0	0	0	0	0	0	0	0	0	0	0	0	0	0	0	0	0	0	1	0	0	0	0	0	0	0	0	0	0	0	0	0	0
MAG60	0	0	0	1	0	0	1	1	0	0	0	0	0	1	0	0	0	0	0	1	0	0	0	0	0	0	0	0	0	0	0	0	0	0	0	0	0	0	0	0	0	0	0	0
MAG61	0	0	0	0	0	1	0	1	0	0	0	0	0	0	0	0	0	0	0	0	0	0	0	0	0	0	0	0	0	1	0	0	0	0	0	0	0	0	0	0	0	0	0	0
MAG62	0	1	0	2	0	1	1	1	0	0	1	0	1	0	0	0	0	0	0	0	0	0	0	0	0	0	0	0	0	1	0	0	0	0	0	0	0	0	0	0	0	0	0	0
MAG63	0	0	0	1	0	0	0	1	0	0	0	0	0	0	0	0	1	0	0	0	0	0	0	0	0	0	0	0	0	0	0	0	0	0	0	0	0	0	0	0	0	0	0	0
MAG64	0	1	0	0	0	1	1	2	0	0	0	0	0	0	1	0	0	0	0	1	0	0	0	0	0	0	0	0	0	0	0	0	0	0	0	0	0	0	0	0	0	1	0	0
MAG65	0	0	1	0	1	1	1	1	0	1	0	0	0	0	0	0	0	0	0	0	0	0	0	0	0	0	0	0	0	0	0	0	0	0	0	0	0	0	0	0	0	0	0	0
MAG66	0	0	0	0	0	2	1	2	0	1	0	0	0	0	0	0	0	0	0	0	0	0	0	0	0	0	0	0	0	0	0	0	0	0	0	0	0	0	0	1	0	0	0	0
MAG67	0	0	0	0	0	1	1	1	0	1	0	0	0	0	0	0	0	0	0	0	0	0	0	0	0	0	0	0	0	0	0	0	0	0	0	0	0	0	0	0	0	0	0	0
MAG68	1	1	0	0	0	1	0	1	0	1	1	0	0	0	0	0	0	0	0	0	0	0	0	0	0	0	0	0	0	1	0	0	0	0	0	0	0	0	0	0	0	0	0	0
MAG69	0	0	0	0	0	1	1	2	0	0	0	0	0	0	1	0	0	0	0	1	0	0	0	0	0	0	0	0	0	0	0	0	0	0	0	0	0	0	0	0	1	0	0	0
MAG7	0	0	0	0	0	1	0	1	0	1	0	0	0	0	0	0	0	0	0	0	0	0	0	0	0	0	0	0	0	0	0	0	0	0	0	0	0	0	0	0	0	0	0	0
MAG70	0	0	0	0	0	1	1	2	0	1	0	0	0	0	0	0	0	0	0	0	0	0	0	0	0	0	0	0	0	0	0	0	0	0	0	0	0	0	0	0	0	0	0	0
MAG71	1	1	0	0	0	1	0	0	0	1	1	0	0	0	0	0	0	0	0	0	0	0	0	0	0	0	0	0	0	1	0	0	0	0	0	0	0	0	0	0	0	0	0	0
MAG72	0	0	0	0	0	1	0	1	0	0	1	0	0	0	0	0	0	0	0	0	0	0	0	0	0	0	0	0	0	1	0	0	0	0	0	0	0	0	0	0	0	0	0	0
MAG73	0	0	0	1	0	1	1	3	0	0	0	0	0	0	1	0	0	0	0	0	0	0	0	0	0	0	0	0	0	0	0	0	0	0	0	0	0	0	0	0	1	1	0	0
MAG74	0	0	0	0	0	1	0	1	0	0	0	0	0	0	0	0	0	0	0	0	0	0	0	0	0	0	0	0	0	0	0	0	0	0	0	0	0	0	0	0	0	0	0	0
MAG75	0	0	0	0	0	0	0	0	0	0	0	0	0	0	0	0	0	0	0	0	0	0	0	0	0	0	0	0	0	1	0	0	0	0	0	0	0	0	0	0	0	0	0	0
MAG76	1	1	0	0	0	1	0	1	0	1	0	0	0	0	0	0	0	0	0	0	0	0	0	0	0	0	0	0	0	1	0	0	0	0	0	0	0	0	0	0	0	0	0	0
MAG77	0	0	0	0	0	2	1	2	0	2	0	0	0	0	0	0	0	0	0	0	0	0	0	0	0	0	0	0	0	0	0	0	0	0	0	0	0	0	0	0	0	0	0	0
MAG78	0	0	0	0	0	1	1	2	0	1	0	0	0	0	0	0	0	0	0	0	0	0	0	0	0	0	0	0	0	0	0	0	0	0	0	0	0	0	0	1	0	0	0	0
MAG79	1	1	1	1	0	1	1	2	0	0	0	0	0	0	1	0	0	0	0	0	0	0	0	0	0	0	0	0	0	0	0	0	0	0	0	0	0	0	0	0	1	0	0	0
MAG8	0	0	0	0	0	2	1	1	0	2	0	0	0	0	0	0	0	0	0	0	0	0	0	0	0	0	0	0	0	0	0	0	0	0	0	0	0	0	0	0	0	0	0	0
MAG80	0	0	0	0	0	2	1	1	0	1	0	0	0	0	0	0	0	0	0	0	0	0	0	0	0	0	0	0	0	0	0	0	0	0	0	0	0	0	0	0	0	0	0	0
MAG81	0	0	0	0	0	2	1	1	0	1	0	0	0	0	0	0	0	0	0	0	0	0	0	0	0	0	0	0	0	0	0	0	0	0	0	0	0	0	0	0	0	0	0	0
MAG82	1	1	0	0	0	1	0	1	0	1	1	0	0	0	0	0	0	0	0	0	0	0	0	0	0	0	0	0	0	1	0	0	0	0	0	0	0	0	0	0	0	0	0	0
MAG83	0	0	0	0	0	1	0	1	0	1	0	0	0	0	0	0	0	0	0	0	0	0	0	0	0	0	0	0	0	0	0	0	0	0	0	0	0	0	0	0	0	0	0	0
MAG84	0	0	0	0	0	2	0	0	0	1	0	0	0	0	0	0	0	0	0	0	0	0	0	0	0	0	0	0	0	0	0	0	0	0	0	0	0	0	0	0	0	0	0	0
MAG85	0	0	0	0	1	2	0	1	0	0	0	0	0	0	0	0	0	0	0	0	0	0	0	0	0	0	0	0	0	0	0	0	0	0	0	0	0	0	0	0	0	0	0	0
MAG86	0	0	0	0	0	1	0	1	0	0	1	0	0	0	1	0	0	0	0	0	0	0	0	0	0	0	0	0	0	1	0	0	0	0	0	0	0	0	0	0	0	0	0	0
MAG87	1	1	0	0	0	0	0	0	0	0	1	0	0	0	0	0	0	0	0	0	0	0	0	0	0	0	0	0	0	1	0	0	0	0	0	0	0	0	0	0	0	0	0	0
MAG88	1	0	0	0	0	1	0	1	0	0	1	0	0	0	0	0	0	0	0	0	0	0	0	0	0	0	0	0	0	1	0	0	0	0	0	0	0	0	0	0	0	0	0	0
MAG89	0	0	0	0	1	1	0	1	1	0	1	0	1	0	0	0	0	0	0	0	0	0	0	0	0	0	0	1	0	1	0	0	0	1	1	0	0	0	0	0	2	0	0	0
MAG9	0	0	0	0	0	1	0	0	0	0	0	0	0	0	0	0	0	0	0	0	0	0	0	0	0	0	0	0	0	1	0	0	0	1	1	0	2	0	0	0	0	0	0	0
MAG90	0	0	0	0	0	1	0	2	0	2	0	0	0	0	0	0	0	0	0	0	0	0	0	0	0	0	0	0	0	0	0	0	0	0	0	0	0	0	0	0	0	0	0	0
MAG91	0	0	0	0	0	1	1	2	0	1	0	0	0	0	0	0	0	0	0	0	0	0	0	0	0	0	0	0	0	0	0	0	0	0	0	0	0	0	0	0	0	0	0	0
MAG92	0	0	0	0	0	2	1	2	0	1	0	0	0	0	0	0	0	0	0	0	0	0	0	0	0	0	0	0	0	0	0	0	0	0	0	0	0	0	0	0	0	0	0	0
MAG93	0	0	0	0	0	1	1	2	0	1	0	0	0	0	0	0	0	0	0	0	0	0	0	0	0	0	0	0	0	0	0	0	0	0	0	0	0	0	0	0	0	0	0	0
MAG94	0	0	0	0	0	2	1	1	0	1	0	0	0	0	0	0	0	0	0	0	0	0	0	0	0	0	0	0	0	0	0	0	0	0	0	0	0	0	0	0	0	0	0	0
MAG95	0	0	0	1	0	1	1	2	0	0	1	0	0	0	0	0	0	0	0	0	0	0	0	0	0	0	0	0	0	1	0	0	0	0	0	0	0	0	0	0	0	0	0	0
MAG96	0	0	0	0	0	1	1	0	0	1	0	0	0	0	0	0	0	0	0	0	0	0	0	0	0	0	0	0	0	0	0	0	0	0	0	0	0	0	0	0	0	0	0	0
MAG97	0	0	0	1	0	1	0	1	0	0	1	0	0	0	0	0	0	0	0	0	0	0	0	0	0	0	0	0	0	1	0	0	0	0	0	0	0	0	0	0	0	0	0	0
MAG98	0	0	0	1	0	0	0	0	0	0	0	0	0	0	1	0	0	0	0	0	0	0	0	0	0	0	0	0	0	0	0	0	0	0	0	0	0	0	0	0	0	0	0	0
MAG99	0	0	0	1	0	1	1	2	0	0	2	0	0	0	0	0	0	0	0	0	0	0	0	0	0	0	0	0	0	2	0	0	0	0	0	0	0	0	0	0	0	0	0	0

## Sheet: query_id
Genome ID	Acetoacetyl-CoA reductase	Butyryl-CoA dehydrogenase	Crotonoyl-CoA reductase	Lactate dehydrogenase	Malate dehydrogenase	Glutamate synthase			Succinate dehydrogenase		Bifurcating hydrogenases		Fermentative hydrogenases			Sensory hydrogenases			Energy-converting hydrogenases				Methanogenic hydrogenases					Respiratory hydrogenases		Hydrogenase-associated diaphorases	Methanogenesis			Wood-Ljungdahl				Nitrate reduction	Nitrite reduction to ammonium		Adenylylsulfate reductase	Sulfite reductase		Dimethyl sulfoxide reductase	Aerobic respiration
	PaaH	ACADS	FabV	LDH	MDH	GdhA	GltB	GltD	SdhA	FrdA	FeFeA3	FeFeA4	FeFeA1	FeFeA2	FeFeB	FeFeC1	FeFeC2	FeFeC3	NiFe4c	NiFe4e	NiFe4f	NiFe4g	Fe	NiFe3a	NiFe3c	NiFe4h	NiFe4i	NiFe1d	NiFe1b	HydB	Mtd	Mer	McrA	CooS	CodH	FdhA	AcsB	NarG	NirB	NrfA	AprA	AsrA	DsrA	DmsA	CydA
MAG1						MAG1__44_36		MAG1__68_7
MAG10						MAG10__35_4,MAG10__139_30	MAG10__86_9	MAG10__144_49		MAG10__37_24
MAG101	MAG101__73_2							MAG101__154_11		MAG101__22_11	MAG101__108_14																			MAG101__108_15															MAG101__141_26
MAG102						MAG102__105_3,MAG102__202_3
MAG103						MAG103__65_3,MAG103__144_17				MAG103__74_1																																			MAG103__109_6
MAG104						MAG104__2_40,MAG104__47_72		MAG104__86_6		MAG104__41_93
MAG105						MAG105__143_8				MAG105__36_5														MAG105__45_5	MAG105__112_3,MAG105__28_17	MAG105__14_34,MAG105__44_11	MAG105__163_16				MAG105__57_19					MAG105__51_6
MAG106		MAG106__401_10		MAG106__315_4		MAG106__371_3	MAG106__52_10	MAG106__52_9,MAG106__258_2			MAG106__102_1																			MAG106__102_2
MAG107						MAG107__12_3,MAG107__129_2		MAG107__23_2		MAG107__190_54																																			MAG107__205_6
MAG108						MAG108__72_3	MAG108__41_5	MAG108__9_6																																					MAG108__116_10
MAG11						MAG11__14_115,MAG11__59_36	MAG11__30_3	MAG11__34_46		MAG11__32_68																																			MAG11__66_31
MAG110				MAG110__147_4			MAG110__113_2	MAG110__102_2			MAG110__200_1					MAG110__200_8														MAG110__200_2,MAG110__83_1
MAG111							MAG111__148_3	MAG111__50_10,MAG111__217_2			MAG111__64_12																			MAG111__64_11
MAG112								MAG112__13_11			MAG112__91_2																			MAG112__55_1
MAG113						MAG113__5_124					MAG113__7_1																			MAG113__7_2
MAG114										MAG114__42_10
MAG115						MAG115__14_30	MAG115__5_50	MAG115__5_49,MAG115__50_3
MAG116						MAG116__18_43,MAG116__34_39				MAG116__65_22																														MAG116__63_4
MAG117	MAG117__70_37	MAG117__70_36				MAG117__20_13		MAG117__36_33		MAG117__59_20	MAG117__6_15																			MAG117__6_16															MAG117__2_61
MAG118						MAG118__15_44,MAG118__46_14	MAG118__19_9	MAG118__2_13,MAG118__19_10																																					MAG118__17_4
MAG119						MAG119__29_23		MAG119__163_19		MAG119__60_18
MAG12	MAG12__206_34					MAG12__25_5		MAG12__4_3		MAG12__188_1	MAG12__56_10																			MAG12__56_11
MAG120											MAG120__103_4																			MAG120__248_2
MAG121				MAG121__29_4		MAG121__35_39	MAG121__13_18	MAG121__13_19,MAG121__118_23							MAG121__74_1							MAG121__60_4
MAG122	MAG122__49_15	MAG122__49_16				MAG122__168_12		MAG122__69_7		MAG122__33_1	MAG122__14_4																			MAG122__14_3															MAG122__64_9
MAG123						MAG123__35_34,MAG123__83_32	MAG123__65_12	MAG123__90_40		MAG123__98_3																																			MAG123__92_6
MAG124	MAG124__41_9	MAG124__47_57				MAG124__28_6		MAG124__30_71		MAG124__27_37	MAG124__72_7																			MAG124__72_6
MAG125											MAG125__144_5
MAG127			MAG127__180_11			MAG127__98_7	MAG127__41_8	MAG127__41_7		MAG127__44_6																								MAG127__90_13	MAG127__90_13	MAG127__98_12
MAG128											MAG128__81_1					MAG128__143_7														MAG128__125_2,MAG128__143_1
MAG129										MAG129__184_14														MAG129__94_7		MAG129__16_1	MAG129__128_14				MAG129__142_5	MAG129__23_4				MAG129__17_8
MAG13			MAG13__255_57	MAG13__50_16		MAG13__269_5		MAG13__71_5,MAG13__137_2							MAG13__13_23			MAG13__77_1
MAG130						MAG130__174_3	MAG130__83_9	MAG130__83_8,MAG130__240_2														MAG130__133_1
MAG131								MAG131__178_9					MAG131__86_2								MAG131__132_3
MAG132			MAG132__62_5				MAG132__143_2	MAG132__19_1							MAG132__108_1
MAG133											MAG133__38_12				MAG133__45_13		MAG133__45_11	MAG133__46_27												MAG133__38_11				MAG133__48_44	MAG133__48_44
MAG134				MAG134__27_9				MAG134__100_14							MAG134__139_7			MAG134__139_5
MAG135										MAG135__119_3
MAG136						MAG136__16_2	MAG136__107_5	MAG136__57_5,MAG136__107_4						MAG136__47_3	MAG136__6_12
MAG137														MAG137__62_3								MAG137__100_8
MAG138				MAG138__42_9
MAG139		MAG139__178_5				MAG139__203_3		MAG139__39_2,MAG139__115_2
MAG14						MAG14__11_5,MAG14__195_13				MAG14__159_46	MAG14__22_9																			MAG14__22_8
MAG140						MAG140__38_6					MAG140__59_12				MAG140__12_3															MAG140__59_11
MAG141						MAG141__8_2		MAG141__18_12			MAG141__102_6				MAG141__3_10		MAG141__3_12													MAG141__102_7
MAG142
MAG143						MAG143__42_7				MAG143__63_2
MAG144						MAG144__2_2
MAG145				MAG145__182_21				MAG145__69_11,MAG145__130_5
MAG146						MAG146__94_11					MAG146__36_10				MAG146__210_5			MAG146__224_1
MAG147						MAG147__30_12		MAG147__46_14			MAG147__46_22				MAG147__74_12		MAG147__46_17													MAG147__46_23
MAG148																														MAG148__70_7
MAG15						MAG15__34_3		MAG15__67_19			MAG15__161_7																			MAG15__161_8
MAG150	MAG150__23_4	MAG150__23_3	MAG150__35_22				MAG150__55_9	MAG150__36_5,MAG150__55_8							MAG150__35_49
MAG151				MAG151__1_4		MAG151__92_2
MAG152						MAG152__78_10		MAG152__109_2			MAG152__87_9			MAG152__169_4																MAG152__87_8
MAG153	MAG153__100_20	MAG153__100_19				MAG153__40_6	MAG153__120_4	MAG153__23_37,MAG153__120_5							MAG153__70_16,MAG153__124_2																										MAG153__5_26
MAG154						MAG154__71_7		MAG154__21_2		MAG154__56_1																																			MAG154__130_2,MAG154__134_7
MAG155
MAG156						MAG156__93_7	MAG156__82_6	MAG156__55_7
MAG157			MAG157__174_3			MAG157__22_3									MAG157__171_3
MAG158						MAG158__82_12		MAG158__77_25																													MAG158__67_7
MAG159											MAG159__29_1					MAG159__98_4
MAG16						MAG16__124_4		MAG16__237_3			MAG16__129_2				MAG16__174_5															MAG16__129_1,MAG16__158_22
MAG160							MAG160__24_3	MAG160__24_4,MAG160__120_12							MAG160__201_8			MAG160__184_9
MAG161											MAG161__55_2							MAG161__23_17
MAG162	MAG162__85_3	MAG162__85_2				MAG162__48_10		MAG162__48_9,MAG162__200_2							MAG162__70_4					MAG162__132_4
MAG163								MAG163__22_9,MAG163__48_3																						MAG163__166_1						MAG163__70_9,MAG163__14_5
MAG164				MAG164__47_15		MAG164__47_1		MAG164__55_9,MAG164__130_2																						MAG164__68_2						MAG164__47_41
MAG165						MAG165__80_12
MAG166				MAG166__70_3		MAG166__130_13		MAG166__50_7						MAG166__15_36	MAG166__99_4
MAG167						MAG167__49_4,MAG167__76_6																								MAG167__42_2
MAG168								MAG168__46_35			MAG168__16_2,MAG168__37_6																			MAG168__16_1,MAG168__3_34
MAG169				MAG169__200_1				MAG169__90_9,MAG169__291_1			MAG169__46_2											MAG169__102_1
MAG17				MAG17__10_16		MAG17__23_38	MAG17__45_70	MAG17__45_71,MAG17__50_33			MAG17__42_30							MAG17__43_30												MAG17__42_29
MAG170						MAG170__6_10										MAG170__45_2
MAG171								MAG171__248_2			MAG171__138_7
MAG172		MAG172__77_9				MAG172__258_1	MAG172__41_4	MAG172__120_7							MAG172__116_4					MAG172__64_12
MAG174	MAG174__38_6	MAG174__38_7					MAG174__66_11	MAG174__66_12,MAG174__122_1
MAG175															MAG175__123_1			MAG175__202_3																							MAG175__137_5
MAG176	MAG176__20_79	MAG176__20_78				MAG176__6_394	MAG176__20_9	MAG176__6_124,MAG176__20_8
MAG177											MAG177__41_81																			MAG177__41_82
MAG178					MAG178__98_1			MAG178__34_5	MAG178__174_4	MAG178__84_51	MAG178__84_55																	MAG178__72_17		MAG178__84_56				MAG178__70_3	MAG178__70_3			MAG178__134_2		MAG178__132_4	MAG178__43_8				MAG178__159_2
MAG179						MAG179__18_7		MAG179__146_8							MAG179__36_9																											MAG179__58_4
MAG18						MAG18__119_6	MAG18__83_22	MAG18__55_5,MAG18__97_1																																MAG18__107_20
MAG180											MAG180__1_15																			MAG180__1_14
MAG182																																													MAG182__4_1
MAG183						MAG183__63_4,MAG183__84_1		MAG183__10_2
MAG184								MAG184__90_3																					MAG184__35_2											MAG184__39_1					MAG184__121_9
MAG185			MAG185__5_2			MAG185__13_16	MAG185__69_3	MAG185__177_3,MAG185__224_2			MAG185__153_3																			MAG185__153_4
MAG187										MAG187__38_22													MAG187__23_1			MAG187__199_19						MAG187__161_12
MAG188						MAG188__102_2	MAG188__93_4	MAG188__8_7,MAG188__93_3		MAG188__22_26
MAG189			MAG189__123_7					MAG189__67_7																										MAG189__97_5	MAG189__97_5						MAG189__241_5
MAG19						MAG19__117_1,MAG19__138_1		MAG19__29_2,MAG19__75_32		MAG19__58_27																														MAG19__50_38					MAG19__121_66
MAG190								MAG190__27_15,MAG190__103_2																												MAG190__39_3
MAG191				MAG191__144_2																										MAG191__71_1
MAG192						MAG192__152_5				MAG192__114_3
MAG193								MAG193__41_3			MAG193__165_2																			MAG193__165_3
MAG194																		MAG194__188_1
MAG195						MAG195__92_4	MAG195__14_2			MAG195__68_12
MAG196	MAG196__128_6			MAG196__54_3		MAG196__26_13	MAG196__48_2	MAG196__187_4			MAG196__1_3				MAG196__1_7															MAG196__1_4						MAG196__103_4
MAG197								MAG197__35_6
MAG198	MAG198__83_11	MAG198__83_10				MAG198__159_1,MAG198__186_3
MAG199				MAG199__162_3				MAG199__69_1
MAG2				MAG2__78_6		MAG2__82_1		MAG2__239_21							MAG2__117_1		MAG2__265_23													MAG2__38_9
MAG20						MAG20__97_1		MAG20__165_40			MAG20__3_11																			MAG20__3_10
MAG200						MAG200__158_11		MAG200__127_2
MAG201								MAG201__20_2
MAG202				MAG202__139_6		MAG202__107_6	MAG202__176_3	MAG202__19_1							MAG202__150_2																											MAG202__208_2
MAG203						MAG203__178_4
MAG204											MAG204__41_16					MAG204__41_9														MAG204__41_15
MAG205								MAG205__119_5
MAG206	MAG206__29_6	MAG206__29_7						MAG206__79_6		MAG206__108_2																																			MAG206__38_17
MAG207				MAG207__116_1				MAG207__191_16			MAG207__140_1																			MAG207__32_1
MAG208				MAG208__72_50		MAG208__24_10,MAG208__98_1					MAG208__72_55				MAG208__117_6		MAG208__117_9													MAG208__72_56
MAG209							MAG209__364_1	MAG209__62_2,MAG209__364_2							MAG209__342_2																			MAG209__136_1,MAG209__304_3	MAG209__136_1,MAG209__304_3						MAG209__352_3
MAG21						MAG21__17_12		MAG21__35_2		MAG21__22_54																																			MAG21__31_4
MAG210																																													MAG210__158_3
MAG211								MAG211__112_2																												MAG211__165_2
MAG212						MAG212__9_22	MAG212__111_4	MAG212__71_27,MAG212__111_5							MAG212__103_5
MAG213						MAG213__27_2,MAG213__31_1	MAG213__188_15	MAG213__188_14						MAG213__45_6																				MAG213__86_5	MAG213__86_5
MAG214											MAG214__53_2							MAG214__234_2												MAG214__133_1,MAG214__175_4
MAG215				MAG215__106_1							MAG215__60_1
MAG216
MAG217						MAG217__89_3		MAG217__24_8
MAG218	MAG218__21_22	MAG218__21_23				MAG218__35_44	MAG218__59_43	MAG218__59_42,MAG218__59_47							MAG218__56_18
MAG219							MAG219__60_2	MAG219__50_2,MAG219__60_3
MAG22						MAG22__248_9,MAG22__337_3		MAG22__164_9		MAG22__260_8
MAG220						MAG220__20_1,MAG220__23_29				MAG220__16_40																																			MAG220__8_12
MAG221							MAG221__188_2	MAG221__13_8,MAG221__188_3								MAG221__10_4
MAG222			MAG222__227_4			MAG222__118_4	MAG222__118_2	MAG222__118_3
MAG223			MAG223__73_1					MAG223__71_3,MAG223__130_1							MAG223__5_7
MAG224				MAG224__157_3		MAG224__47_5,MAG224__152_1					MAG224__106_4			MAG224__185_3																MAG224__106_5
MAG225						MAG225__32_5	MAG225__163_3	MAG225__163_2		MAG225__167_1																																			MAG225__68_4
MAG226			MAG226__112_18	MAG226__154_3			MAG226__82_8	MAG226__82_7,MAG226__134_3																						MAG226__18_1
MAG227
MAG228								MAG228__130_10							MAG228__155_2					MAG228__70_6
MAG229						MAG229__30_14,MAG229__121_6					MAG229__128_7			MAG229__62_4																MAG229__115_14,MAG229__128_8
MAG23						MAG23__18_9,MAG23__18_11		MAG23__33_31		MAG23__69_5																																			MAG23__23_2
MAG230	MAG230__43_6																MAG230__103_2					MAG230__88_10
MAG231				MAG231__84_22		MAG231__153_8	MAG231__157_2	MAG231__157_1							MAG231__27_5
MAG232						MAG232__16_4		MAG232__67_3			MAG232__54_15																			MAG232__54_16
MAG233				MAG233__38_16			MAG233__127_7	MAG233__32_26,MAG233__127_8			MAG233__63_12				MAG233__63_9															MAG233__63_11						MAG233__131_23,MAG233__33_5
MAG234				MAG234__41_8							MAG234__69_4				MAG234__13_2															MAG234__69_3
MAG235				MAG235__156_17							MAG235__104_5							MAG235__55_22												MAG235__104_6
MAG236								MAG236__1_5							MAG236__202_3
MAG237				MAG237__26_29
MAG238											MAG238__55_6,MAG238__152_8																			MAG238__152_7,MAG238__55_4
MAG239															MAG239__56_3
MAG24	MAG24__31_5	MAG24__7_24				MAG24__36_10		MAG24__66_73		MAG24__37_1	MAG24__34_24																			MAG24__34_23
MAG240						MAG240__131_4				MAG240__118_1																MAG240__127_3										MAG240__110_6
MAG241				MAG241__154_7		MAG241__155_16
MAG242	MAG242__106_2	MAG242__469_15			MAG242__176_11	MAG242__414_6	MAG242__187_6	MAG242__187_5	MAG242__176_7																											MAG242__546_4		MAG242__499_8	MAG242__312_5					MAG242__471_5	MAG242__92_31,MAG242__520_20,MAG242__104_7
MAG243				MAG243__14_1,MAG243__31_21,MAG243__156_5		MAG243__6_22					MAG243__132_15				MAG243__62_39															MAG243__132_14
MAG244				MAG244__98_44			MAG244__25_5	MAG244__12_18,MAG244__25_4,MAG244__80_2			MAG244__66_3				MAG244__105_1
MAG245						MAG245__51_8	MAG245__89_2	MAG245__77_5,MAG245__89_3			MAG245__55_1			MAG245__41_6
MAG246				MAG246__76_10		MAG246__58_4					MAG246__104_4				MAG246__84_3															MAG246__104_3
MAG247						MAG247__177_1		MAG247__156_1
MAG248								MAG248__28_10		MAG248__69_12																																			MAG248__113_5
MAG249						MAG249__49_22,MAG249__78_14		MAG249__8_5
MAG25						MAG25__5_42		MAG25__14_120														MAG25__6_11
MAG250						MAG250__8_4		MAG250__53_2			MAG250__90_15																			MAG250__90_14
MAG251				MAG251__5_29			MAG251__53_31	MAG251__22_18,MAG251__53_32,MAG251__150_6			MAG251__85_2				MAG251__58_11															MAG251__108_13,MAG251__85_1						MAG251__90_19
MAG252			MAG252__183_3					MAG252__118_5			MAG252__159_8				MAG252__132_3															MAG252__159_7
MAG253				MAG253__42_15				MAG253__88_2
MAG254						MAG254__42_3		MAG254__41_7						MAG254__168_23	MAG254__60_7		MAG254__60_5													MAG254__158_11,MAG254__82_1
MAG255						MAG255__109_2		MAG255__29_2
MAG256	MAG256__22_4					MAG256__12_2		MAG256__67_8							MAG256__104_10							MAG256__188_13
MAG257																				MAG257__233_1,MAG257__63_1														MAG257__115_9	MAG257__115_9
MAG258						MAG258__72_7												MAG258__137_9												MAG258__274_24
MAG259							MAG259__1_10	MAG259__166_5												MAG259__113_2
MAG26						MAG26__57_10		MAG26__75_4		MAG26__44_11	MAG26__19_1																			MAG26__19_2
MAG260				MAG260__24_17,MAG260__47_2				MAG260__8_4,MAG260__18_12
MAG261							MAG261__2_1																		MAG261__136_1								MAG261__27_12,MAG261__27_13
MAG262	MAG262__42_14	MAG262__42_13		MAG262__22_2		MAG262__61_2	MAG262__3_2	MAG262__3_3												MAG262__83_3
MAG263						MAG263__29_3		MAG263__148_1		MAG263__72_14
MAG264	MAG264__63_97	MAG264__63_33,MAG264__63_96		MAG264__21_63			MAG264__12_8	MAG264__58_10						MAG264__51_2	MAG264__32_1	MAG264__67_21
MAG265								MAG265__3_12			MAG265__63_13																			MAG265__60_1,MAG265__63_14
MAG267						MAG267__30_6,MAG267__88_18		MAG267__191_6
MAG269					MAG269__42_3	MAG269__14_2,MAG269__109_2				MAG269__42_7
MAG27						MAG27__129_38				MAG27__147_6
MAG270						MAG270__194_4		MAG270__47_2							MAG270__177_16			MAG270__6_6
MAG272				MAG272__178_3				MAG272__77_5												MAG272__144_5
MAG273						MAG273__53_2	MAG273__12_11	MAG273__12_10
MAG274						MAG274__223_2,MAG274__296_2				MAG274__14_10
MAG275								MAG275__28_3							MAG275__65_5
MAG276							MAG276__152_2	MAG276__152_3	MAG276__20_9,MAG276__55_1
MAG278								MAG278__36_6,MAG278__147_5							MAG278__36_2
MAG279				MAG279__156_2				MAG279__29_12
MAG28								MAG28__200_2,MAG28__240_5		MAG28__230_3
MAG280								MAG280__186_7		MAG280__217_1
MAG281								MAG281__59_1
MAG282								MAG282__13_5	MAG282__45_8				MAG282__39_3								MAG282__148_4
MAG283				MAG283__52_2							MAG283__107_6																			MAG283__107_5
MAG284						MAG284__44_44		MAG284__55_34		MAG284__14_11
MAG285						MAG285__21_2,MAG285__26_26		MAG285__30_4		MAG285__42_29																																			MAG285__42_39
MAG286								MAG286__127_3
MAG287															MAG287__3_13
MAG288				MAG288__114_11																										MAG288__74_7
MAG289						MAG289__134_1					MAG289__4_2,MAG289__87_4																			MAG289__87_3
MAG29				MAG29__22_5,MAG29__37_16		MAG29__88_28	MAG29__54_32	MAG29__54_31,MAG29__85_13			MAG29__6_10							MAG29__60_21,MAG29__77_35												MAG29__6_9
MAG290															MAG290__15_3
MAG291				MAG291__30_6														MAG291__81_10
MAG292			MAG292__138_3	MAG292__21_2		MAG292__186_2	MAG292__21_6	MAG292__92_1
MAG293											MAG293__22_25																			MAG293__22_24
MAG294						MAG294__262_4												MAG294__72_2												MAG294__402_1
MAG295		MAG295__59_3												MAG295__63_1																MAG295__25_5
MAG296								MAG296__62_2							MAG296__213_5																					MAG296__396_28
MAG297						MAG297__30_14,MAG297__47_3					MAG297__153_7			MAG297__18_2																MAG297__54_1
MAG298						MAG298__83_9					MAG298__84_11					MAG298__84_4														MAG298__84_10,MAG298__95_7,MAG298__95_8
MAG299						MAG299__7_25	MAG299__48_3			MAG299__6_4																														MAG299__137_3					MAG299__120_2
MAG3						MAG3__42_3,MAG3__53_3		MAG3__55_3		MAG3__84_3																																			MAG3__222_10
MAG30				MAG30__11_3				MAG30__112_5			MAG30__73_5																			MAG30__73_6
MAG300						MAG300__31_15,MAG300__122_9																																							MAG300__104_3
MAG302						MAG302__35_7		MAG302__122_20		MAG302__72_4,MAG302__9_1
MAG303		MAG303__77_18		MAG303__45_43		MAG303__111_5	MAG303__84_5	MAG303__65_100,MAG303__84_6							MAG303__47_13							MAG303__113_7
MAG304						MAG304__159_4				MAG304__47_7																																			MAG304__122_3
MAG305
MAG306						MAG306__96_11		MAG306__123_15																						MAG306__86_1
MAG307		MAG307__40_8,MAG307__121_11		MAG307__95_17,MAG307__179_3		MAG307__125_1	MAG307__116_13	MAG307__93_5,MAG307__116_12						MAG307__64_2	MAG307__15_1					MAG307__52_5
MAG308						MAG308__134_5	MAG308__134_11	MAG308__70_4,MAG308__134_10							MAG308__153_10			MAG308__191_2		MAG308__71_6
MAG309	MAG309__81_5	MAG309__81_4			MAG309__20_13	MAG309__25_12		MAG309__38_5
MAG31						MAG31__154_9	MAG31__3_28	MAG31__72_4		MAG31__37_5
MAG310						MAG310__22_1,MAG310__102_8																								MAG310__75_2
MAG311	MAG311__121_1	MAG311__21_3						MAG311__188_9		MAG311__69_9	MAG311__144_3																			MAG311__147_1
MAG312							MAG312__62_7	MAG312__62_6,MAG312__70_5							MAG312__20_6
MAG313	MAG313__45_14	MAG313__45_15				MAG313__52_6	MAG313__49_1	MAG313__37_60,MAG313__49_2						MAG313__8_82	MAG313__95_16			MAG313__66_9		MAG313__95_5
MAG314						MAG314__75_3		MAG314__53_4,MAG314__212_5		MAG314__217_5
MAG315			MAG315__176_20			MAG315__273_3		MAG315__263_2										MAG315__176_7
MAG316						MAG316__164_2		MAG316__83_8		MAG316__15_2
MAG317						MAG317__43_6,MAG317__122_2,MAG317__125_3	MAG317__75_20	MAG317__75_21		MAG317__57_13
MAG318						MAG318__45_5		MAG318__104_11			MAG318__106_10																			MAG318__106_9,MAG318__120_4
MAG319			MAG319__145_4				MAG319__11_8	MAG319__11_7							MAG319__126_1
MAG32				MAG32__34_8,MAG32__91_14		MAG32__80_3	MAG32__1_15	MAG32__1_14,MAG32__112_8							MAG32__15_1,MAG32__125_3																										MAG32__106_23
MAG320					MAG320__60_3			MAG320__83_9			MAG320__8_1		MAG320__19_3																	MAG320__8_2				MAG320__24_4							MAG320__29_8				MAG320__83_15
MAG321						MAG321__2_8																																							MAG321__204_1
MAG322				MAG322__115_3		MAG322__130_5	MAG322__137_2	MAG322__14_8			MAG322__119_4				MAG322__87_2															MAG322__119_5
MAG323														MAG323__11_3																MAG323__22_2
MAG324						MAG324__146_1,MAG324__280_10
MAG325						MAG325__116_4		MAG325__60_4							MAG325__155_2															MAG325__155_4
MAG326				MAG326__63_4		MAG326__98_4		MAG326__75_2			MAG326__33_8																			MAG326__33_7
MAG327											MAG327__58_18																			MAG327__58_17
MAG328								MAG328__200_2										MAG328__299_5
MAG329						MAG329__44_1		MAG329__6_4
MAG33	MAG33__26_7	MAG33__26_8				MAG33__177_6		MAG33__98_3			MAG33__68_4				MAG33__182_1															MAG33__68_3
MAG330		MAG330__11_57		MAG330__36_6,MAG330__40_26		MAG330__4_5	MAG330__15_19	MAG330__11_27,MAG330__15_20					MAG330__63_6		MAG330__54_26					MAG330__13_92																						MAG330__31_24
MAG331	MAG331__72_5				MAG331__2_3					MAG331__173_4	MAG331__1_3				MAG331__108_6															MAG331__1_4
MAG332					MAG332__18_111
MAG333				MAG333__273_2		MAG333__329_2		MAG333__173_1																						MAG333__209_1
MAG334				MAG334__149_2				MAG334__125_43			MAG334__119_3																			MAG334__70_1
MAG335						MAG335__64_3		MAG335__87_22		MAG335__133_16
MAG336						MAG336__176_1					MAG336__187_2																			MAG336__187_1
MAG337						MAG337__152_8
MAG338						MAG338__22_10			MAG338__137_1																																				MAG338__113_4
MAG339				MAG339__22_6		MAG339__32_13		MAG339__78_8,MAG339__160_3						MAG339__138_9	MAG339__86_4																					MAG339__65_2
MAG34					MAG34__38_2	MAG34__51_2		MAG34__66_20	MAG34__14_26																			MAG34__37_61												MAG34__11_8
MAG340						MAG340__100_6	MAG340__5_2	MAG340__5_3						MAG340__191_1																				MAG340__134_6			MAG340__252_3
MAG341						MAG341__170_10
MAG342							MAG342__62_13	MAG342__62_12,MAG342__123_7			MAG342__13_1					MAG342__35_6
MAG343		MAG343__21_4				MAG343__65_2		MAG343__45_7
MAG344	MAG344__10_1					MAG344__51_1																																			MAG344__41_5
MAG345						MAG345__16_13
MAG346						MAG346__167_1		MAG346__191_3						MAG346__88_2
MAG347						MAG347__39_45,MAG347__88_8		MAG347__173_4		MAG347__39_24																																			MAG347__47_12
MAG348	MAG348__56_6,MAG348__108_34					MAG348__87_3
MAG349							MAG349__38_2	MAG349__124_6							MAG349__171_4
MAG35						MAG35__230_4	MAG35__24_3	MAG35__187_1		MAG35__227_1																																			MAG35__126_5
MAG350				MAG350__18_9
MAG351				MAG351__14_26
MAG352	MAG352__70_10	MAG352__70_9				MAG352__88_9		MAG352__43_8,MAG352__80_1			MAG352__54_10			MAG352__18_72																MAG352__54_11
MAG353						MAG353__79_1												MAG353__40_4
MAG354					MAG354__28_15			MAG354__128_5		MAG354__119_7																								MAG354__32_2	MAG354__32_2
MAG355	MAG355__190_5														MAG355__151_33					MAG355__78_5
MAG356		MAG356__94_6		MAG356__50_4			MAG356__36_11	MAG356__36_10,MAG356__98_2																												MAG356__53_12
MAG357						MAG357__13_9,MAG357__230_4																								MAG357__38_1
MAG358						MAG358__27_2					MAG358__37_9																			MAG358__37_8
MAG359		MAG359__42_2		MAG359__65_1		MAG359__54_6																MAG359__59_4
MAG36				MAG36__140_3		MAG36__75_1	MAG36__70_4	MAG36__70_3			MAG36__108_13					MAG36__108_6														MAG36__108_12,MAG36__140_1
MAG360								MAG360__49_4		MAG360__44_4																																			MAG360__49_10
MAG361															MAG361__120_16
MAG362						MAG362__42_5,MAG362__74_18				MAG362__3_14																														MAG362__51_13					MAG362__59_12
MAG363			MAG363__76_3			MAG363__131_2					MAG363__89_2				MAG363__154_6															MAG363__89_3
MAG364				MAG364__16_3,MAG364__147_19				MAG364__18_18,MAG364__51_2						MAG364__41_25	MAG364__123_2
MAG365						MAG365__53_11,MAG365__74_5				MAG365__25_5
MAG366						MAG366__236_3	MAG366__254_2	MAG366__236_2,MAG366__254_3							MAG366__76_8
MAG367						MAG367__54_11				MAG367__154_12
MAG369				MAG369__26_12,MAG369__182_8		MAG369__157_4									MAG369__138_3		MAG369__138_5
MAG37						MAG37__59_21		MAG37__38_4		MAG37__40_19	MAG37__71_18																			MAG37__71_17															MAG37__67_5
MAG370	MAG370__16_13,MAG370__49_6	MAG370__16_12						MAG370__113_4,MAG370__140_10							MAG370__9_5																										MAG370__7_3	MAG370__44_8
MAG371				MAG371__36_22,MAG371__45_16			MAG371__10_5	MAG371__10_4			MAG371__8_9							MAG371__106_5
MAG372						MAG372__164_7		MAG372__238_6
MAG373						MAG373__3_1				MAG373__124_5
MAG374	MAG374__41_15	MAG374__80_3						MAG374__63_3
MAG375																														MAG375__49_1
MAG376						MAG376__195_2				MAG376__62_5									MAG376__124_1																					MAG376__156_11		MAG376__28_3	MAG376__132_1		MAG376__54_3
MAG377			MAG377__14_28	MAG377__37_21		MAG377__11_2	MAG377__37_5	MAG377__35_85,MAG377__37_4			MAG377__28_128																			MAG377__28_129
MAG378								MAG378__11_1			MAG378__182_1
MAG379						MAG379__72_15		MAG379__129_10
MAG38								MAG38__194_1																						MAG38__81_2
MAG381				MAG381__124_2		MAG381__182_2		MAG381__28_7,MAG381__202_8
MAG382																		MAG382__161_6
MAG383				MAG383__173_3				MAG383__105_16
MAG384						MAG384__150_1		MAG384__181_10
MAG385						MAG385__32_15
MAG386		MAG386__163_1					MAG386__55_9	MAG386__55_8,MAG386__118_4							MAG386__146_3					MAG386__160_14
MAG387			MAG387__182_6	MAG387__141_2			MAG387__46_5	MAG387__103_2,MAG387__209_4
MAG388											MAG388__172_17																			MAG388__172_16
MAG389						MAG389__35_13,MAG389__74_32		MAG389__78_4		MAG389__16_53																														MAG389__109_53					MAG389__60_6
MAG39						MAG39__119_8,MAG39__173_5	MAG39__140_2	MAG39__29_13		MAG39__159_10
MAG390						MAG390__71_9
MAG391						MAG391__62_10		MAG391__206_4
MAG392								MAG392__50_2
MAG393															MAG393__48_2
MAG394						MAG394__12_34				MAG394__62_3																																			MAG394__96_3
MAG395				MAG395__60_45		MAG395__30_37
MAG396						MAG396__42_11
MAG397								MAG397__155_2			MAG397__217_7				MAG397__3_3															MAG397__217_6
MAG398				MAG398__82_56							MAG398__94_16																			MAG398__94_15
MAG399										MAG399__104_7																	MAG399__139_10				MAG399__54_5		MAG399__54_3,MAG399__54_4
MAG4						MAG4__67_14		MAG4__61_8		MAG4__152_5,MAG4__48_1
MAG40						MAG40__47_12,MAG40__105_16	MAG40__109_8	MAG40__103_9		MAG40__82_22																																			MAG40__35_30
MAG400								MAG400__42_20			MAG400__20_29																			MAG400__20_28				MAG400__35_31	MAG400__35_31		MAG400__35_29
MAG401						MAG401__39_13	MAG401__10_10	MAG401__86_34			MAG401__92_17																			MAG401__92_18
MAG402						MAG402__48_5						MAG402__89_5		MAG402__91_4
MAG403						MAG403__79_14,MAG403__173_2	MAG403__107_6	MAG403__98_11
MAG404						MAG404__37_1		MAG404__39_2			MAG404__5_19,MAG404__64_2,MAG404__71_4																			MAG404__64_3,MAG404__71_3
MAG405
MAG406																MAG406__126_3														MAG406__126_9
MAG407						MAG407__103_4
MAG408						MAG408__40_1,MAG408__40_3
MAG409				MAG409__168_14																										MAG409__174_4
MAG41	MAG41__29_33	MAG41__29_34		MAG41__24_59		MAG41__23_8	MAG41__3_9	MAG41__2_47,MAG41__3_10							MAG41__29_51
MAG410															MAG410__50_4
MAG411						MAG411__31_3
MAG412						MAG412__6_3
MAG413						MAG413__101_16,MAG413__202_1				MAG413__180_22
MAG414				MAG414__101_9			MAG414__106_7	MAG414__2_40,MAG414__106_8																																	MAG414__90_1
MAG415											MAG415__159_13				MAG415__168_17		MAG415__168_15	MAG415__76_4												MAG415__159_14				MAG415__86_3	MAG415__86_3
MAG416								MAG416__23_4			MAG416__58_3																			MAG416__58_4
MAG417															MAG417__30_3
MAG418						MAG418__110_1	MAG418__14_4	MAG418__3_15,MAG418__14_5												MAG418__34_15
MAG419						MAG419__60_7		MAG419__65_8																																					MAG419__93_4
MAG42		MAG42__166_4				MAG42__81_8		MAG42__16_16		MAG42__65_21	MAG42__14_8																			MAG42__14_9,MAG42__82_1
MAG420	MAG420__79_7							MAG420__195_6			MAG420__98_4
MAG421		MAG421__118_2		MAG421__85_5			MAG421__173_8	MAG421__188_16							MAG421__219_2		MAG421__219_4													MAG421__68_9
MAG422			MAG422__24_10	MAG422__99_11		MAG422__87_16	MAG422__51_44	MAG422__40_10,MAG422__51_43							MAG422__55_3			MAG422__36_4
MAG423		MAG423__121_17		MAG423__77_5				MAG423__56_6,MAG423__99_1							MAG423__119_19
MAG424				MAG424__116_2											MAG424__85_4
MAG425
MAG426						MAG426__193_2	MAG426__49_2	MAG426__49_3
MAG428						MAG428__75_8	MAG428__70_2
MAG429						MAG429__97_14									MAG429__182_8			MAG429__155_5
MAG43						MAG43__189_6		MAG43__69_2			MAG43__1_5																			MAG43__1_6										MAG43__70_4
MAG430						MAG430__55_4		MAG430__2_1
MAG431			MAG431__99_1	MAG431__60_15		MAG431__92_17		MAG431__175_4
MAG432								MAG432__70_6																																					MAG432__183_5
MAG44			MAG44__13_15	MAG44__10_4		MAG44__40_6	MAG44__59_30	MAG44__59_31			MAG44__33_15																			MAG44__33_16
MAG45						MAG45__234_34				MAG45__266_5
MAG46	MAG46__25_48	MAG46__15_13				MAG46__32_22		MAG46__32_73		MAG46__4_16	MAG46__32_104																			MAG46__32_103
MAG47						MAG47__2_9,MAG47__106_3	MAG47__103_71	MAG47__103_70		MAG47__75_12																																			MAG47__18_31
MAG48						MAG48__38_20		MAG48__20_18		MAG48__49_2
MAG49						MAG49__9_3,MAG49__50_32	MAG49__53_14	MAG49__10_8,MAG49__53_13		MAG49__2_1																																			MAG49__6_30
MAG5						MAG5__24_5,MAG5__24_7	MAG5__63_24	MAG5__9_4,MAG5__63_25																																					MAG5__8_32
MAG50								MAG50__35_11			MAG50__154_10																			MAG50__154_9
MAG51	MAG51__40_9	MAG51__40_10		MAG51__167_4		MAG51__40_15		MAG51__133_2,MAG51__189_2							MAG51__21_6,MAG51__54_4																										MAG51__124_18
MAG52						MAG52__43_16,MAG52__207_5				MAG52__124_3
MAG53						MAG53__7_36,MAG53__27_6	MAG53__102_8	MAG53__99_9		MAG53__80_4
MAG54						MAG54__37_1		MAG54__61_2			MAG54__205_5																			MAG54__189_7
MAG55						MAG55__139_3	MAG55__132_7								MAG55__35_11
MAG56						MAG56__102_1,MAG56__154_5,MAG56__250_1		MAG56__243_1		MAG56__207_3	MAG56__66_4																			MAG56__66_3
MAG57	MAG57__10_59	MAG57__10_58		MAG57__10_139		MAG57__17_158	MAG57__14_14	MAG57__14_15,MAG57__14_264						MAG57__17_274	MAG57__10_8			MAG57__18_74		MAG57__5_67
MAG58	MAG58__29_6	MAG58__29_7,MAG58__49_40						MAG58__27_20						MAG58__6_4	MAG58__22_31,MAG58__35_7	MAG58__24_29																										MAG58__35_9
MAG59				MAG59__4_5		MAG59__6_81		MAG59__31_104			MAG59__22_20																			MAG59__22_19
MAG6								MAG6__199_7			MAG6__114_11																			MAG6__114_10
MAG60				MAG60__46_16			MAG60__7_23	MAG60__29_45						MAG60__36_3						MAG60__43_65
MAG61						MAG61__22_10		MAG61__51_25																						MAG61__56_36
MAG62		MAG62__53_4		MAG62__25_11,MAG62__52_19		MAG62__37_28	MAG62__43_37	MAG62__43_36			MAG62__64_98		MAG62__51_9																	MAG62__64_97
MAG63				MAG63__15_5				MAG63__69_8										MAG63__97_10
MAG64		MAG64__49_12				MAG64__6_4	MAG64__5_8	MAG64__5_7,MAG64__13_15							MAG64__52_56					MAG64__52_47																						MAG64__39_17
MAG65			MAG65__43_171		MAG65__4_131	MAG65__36_5	MAG65__20_38	MAG65__20_39		MAG65__37_5
MAG66						MAG66__37_29,MAG66__38_41	MAG66__25_92	MAG66__19_4,MAG66__25_93		MAG66__59_33																														MAG66__59_80					MAG66__25_65
MAG67						MAG67__91_3	MAG67__50_15	MAG67__50_16		MAG67__95_47
MAG68	MAG68__88_5	MAG68__187_4				MAG68__151_23		MAG68__109_3		MAG68__38_5	MAG68__66_1																			MAG68__66_2
MAG69						MAG69__22_46	MAG69__20_164	MAG69__14_23,MAG69__20_165							MAG69__22_4					MAG69__3_15																					MAG69__7_36
MAG7						MAG7__104_11		MAG7__32_3		MAG7__157_15
MAG70						MAG70__62_32	MAG70__69_24	MAG70__67_4,MAG70__69_23		MAG70__49_8
MAG71	MAG71__46_9	MAG71__46_10				MAG71__30_39				MAG71__5_3	MAG71__47_33																			MAG71__47_32															MAG71__35_38
MAG72						MAG72__163_4		MAG72__275_3			MAG72__185_11																			MAG72__185_10
MAG73				MAG73__98_12		MAG73__12_7	MAG73__82_6	MAG73__52_2,MAG73__82_7,MAG73__158_15							MAG73__151_15																										MAG73__121_4	MAG73__32_22
MAG74						MAG74__251_10		MAG74__25_3
MAG75																														MAG75__177_1
MAG76	MAG76__65_23	MAG76__36_30				MAG76__30_12		MAG76__31_19		MAG76__70_38																				MAG76__16_78
MAG77						MAG77__17_56,MAG77__91_48	MAG77__6_79	MAG77__6_78,MAG77__42_83		MAG77__22_19,MAG77__75_9																																			MAG77__69_18
MAG78						MAG78__38_5	MAG78__91_1	MAG78__83_26,MAG78__91_2		MAG78__134_10																														MAG78__55_3					MAG78__64_11
MAG79	MAG79__24_10	MAG79__24_11	MAG79__13_4	MAG79__155_2		MAG79__168_23	MAG79__92_4	MAG79__92_5,MAG79__98_2							MAG79__20_5																										MAG79__143_28
MAG8						MAG8__40_14,MAG8__179_17	MAG8__211_31	MAG8__106_8		MAG8__165_19,MAG8__206_20																																			MAG8__33_11
MAG80						MAG80__3_74,MAG80__34_33	MAG80__54_1	MAG80__31_63		MAG80__59_66																																			MAG80__26_10
MAG81						MAG81__15_35,MAG81__52_3	MAG81__57_18	MAG81__31_6		MAG81__8_62																																			MAG81__11_26
MAG82	MAG82__52_2	MAG82__52_1				MAG82__216_7		MAG82__199_2		MAG82__10_2	MAG82__131_7																			MAG82__131_6															MAG82__106_14
MAG83						MAG83__260_5		MAG83__56_2		MAG83__86_8																																			MAG83__114_5
MAG84						MAG84__104_52,MAG84__105_3				MAG84__47_1
MAG85					MAG85__50_51	MAG85__59_18,MAG85__68_14		MAG85__27_6
MAG86						MAG86__59_1		MAG86__42_10			MAG86__111_6				MAG86__88_8															MAG86__111_7
MAG87	MAG87__41_14	MAG87__38_7									MAG87__92_6																			MAG87__146_1
MAG88	MAG88__11_50					MAG88__53_27		MAG88__79_9			MAG88__43_2																			MAG88__43_3
MAG89					MAG89__7_19	MAG89__69_2		MAG89__35_11	MAG89__49_29		MAG89__42_6		MAG89__118_14															MAG89__22_8		MAG89__42_7				MAG89__68_12	MAG89__68_12						MAG89__133_4,MAG89__77_36				MAG89__114_2
MAG9						MAG9__271_6																								MAG9__108_2				MAG9__309_2	MAG9__309_2		MAG9__236_2,MAG9__323_2
MAG90						MAG90__261_6		MAG90__139_22,MAG90__259_1		MAG90__182_1,MAG90__234_1
MAG91						MAG91__88_23	MAG91__52_15	MAG91__52_14,MAG91__63_29		MAG91__92_35
MAG92						MAG92__11_8,MAG92__23_68	MAG92__6_69	MAG92__6_70,MAG92__22_37		MAG92__30_11																																			MAG92__8_9
MAG93						MAG93__62_1	MAG93__33_13	MAG93__33_14,MAG93__57_1		MAG93__40_15
MAG94						MAG94__18_10,MAG94__71_1	MAG94__134_1	MAG94__89_13		MAG94__112_32																																			MAG94__1_2
MAG95				MAG95__238_2		MAG95__45_9	MAG95__41_3	MAG95__41_4,MAG95__284_2			MAG95__232_17																			MAG95__232_16
MAG96						MAG96__78_1	MAG96__35_38			MAG96__32_35
MAG97				MAG97__126_4		MAG97__57_7		MAG97__60_2			MAG97__161_8																			MAG97__161_7
MAG98				MAG98__61_4											MAG98__64_20
MAG99				MAG99__37_18		MAG99__117_3	MAG99__108_13	MAG99__108_12,MAG99__120_3			MAG99__69_7,MAG99__124_2																			MAG99__124_1,MAG99__69_6

## Sheet: electron transfer
MAG	gdhA	fabV	gltB	gltD	ACADS	LDH	mdh	paaH	frdA	SdhA
MAG1	1			1
MAG10	2		1	1					1	1
MAG101				1				1	1	1
MAG102	2
MAG103	2								1	1
MAG104	2			1					1	1
MAG105	1								1	1
MAG106	1		1	2	1	1
MAG107	2			1					1	1
MAG108	1		1	1
MAG11	2		1	1					1	1
MAG110			1	1		1
MAG111			1	2
MAG112				1
MAG113	1
MAG115	1		1	2
MAG116	2								1	1
MAG117	1			1	1			1	1	1
MAG118	2		1	2
MAG119	1			1					1	1
MAG12	1			1				1	1	1
MAG121	1		1	2		1
MAG122	1			1	1			1	1	1
MAG123	2		1	1					1	1
MAG124	1			1	1			1	1	1
MAG127	1	1	1	1					1	1
MAG13	1	1		2		1
MAG130	1		1	2
MAG131				1
MAG132		1	1	1
MAG134				1		1
MAG136	1		1	2
MAG138						1
MAG139	1			2	1
MAG14	2								1	1
MAG140	1
MAG141	1			1
MAG143	1								1	1
MAG144	1
MAG145				2		1
MAG146	1
MAG147	1			1
MAG15	1			1
MAG150		1	1	2	1			1
MAG151	1					1
MAG152	1			1
MAG153	1		1	2	1			1
MAG154	1			1					1	1
MAG156	1		1	1
MAG157	1	1
MAG158	1			1
MAG16	1			1
MAG160			1	2
MAG162	1			2	1			1
MAG163				2
MAG164	1			2		1
MAG165	1
MAG166	1			1		1
MAG167	2
MAG168				1
MAG169				2		1
MAG17	1		1	2		1
MAG170	1
MAG171				1
MAG172	1		1	1	1
MAG174			1	2	1			1
MAG176	1		1	2	1			1
MAG178				1			1		1	1
MAG179	1			1
MAG18	1		1	2
MAG183	2			1
MAG184				1
MAG185	1	1	1	2
MAG188	1		1	2					1	1
MAG189		1		1
MAG19	2			2					1	1
MAG190				2
MAG191						1
MAG192	1								1	1
MAG193				1
MAG195	1		1						1	1
MAG196	1		1	1		1		1
MAG197				1
MAG198	2				1			1
MAG199				1		1
MAG2	1			1		1
MAG20	1			1
MAG200	1			1
MAG201				1
MAG202	1		1	1		1
MAG203	1
MAG205				1
MAG206				1	1			1	1	1
MAG207				1		1
MAG208	2					1
MAG209			1	2
MAG21	1			1					1	1
MAG211				1
MAG212	1		1	2
MAG213	2		1	1
MAG215						1
MAG217	1			1
MAG218	1		1	2	1			1
MAG219			1	2
MAG22	2			1					1	1
MAG220	2								1	1
MAG221			1	2
MAG222	1	1	1	1
MAG223		1		2
MAG224	2					1
MAG225	1		1	1					1	1
MAG226		1	1	2		1
MAG228				1
MAG229	2
MAG23	2			1					1	1
MAG230								1
MAG231	1		1	1		1
MAG232	1			1
MAG233			1	2		1
MAG234						1
MAG235						1
MAG236				1
MAG237						1
MAG24	1			1	1			1	1	1
MAG240	1								1	1
MAG241	1					1
MAG242	1		1	1	1		1	1
MAG243	1					3
MAG244			1	3		1
MAG245	1		1	2
MAG246	1					1
MAG247	1			1
MAG248				1					1	1
MAG249	2			1
MAG25	1			1
MAG250	1			1
MAG251			1	3		1
MAG252		1		1
MAG253				1		1
MAG254	1			1
MAG255	1			1
MAG256	1			1				1
MAG258	1
MAG259			1	1
MAG26	1			1					1	1
MAG260				2		2
MAG261			1
MAG262	1		1	1	1	1		1
MAG263	1			1					1	1
MAG264			1	1	2	1		1
MAG265				1
MAG267	2			1
MAG269	2						1		1	1
MAG27	1								1	1
MAG270	1			1
MAG272				1		1
MAG273	1		1	1
MAG274	2								1	1
MAG275				1
MAG276			1	1
MAG278				2
MAG279				1		1
MAG28				2					1	1
MAG280				1					1	1
MAG281				1
MAG282				1
MAG283						1
MAG284	1			1					1	1
MAG285	2			1					1	1
MAG286				1
MAG288						1
MAG289	1
MAG29	1		1	2		2
MAG291						1
MAG292	1	1	1	1		1
MAG294	1
MAG296				1
MAG297	2
MAG298	1
MAG299	1		1						1	1
MAG3	2			1					1	1
MAG30				1		1
MAG300	2
MAG302	1			1					2	2
MAG303	1		1	2	1	1
MAG304	1								1	1
MAG306	1			1
MAG307	1		1	2	2	2
MAG308	1		1	2
MAG309	1			1	1		1	1
MAG31	1		1	1					1	1
MAG310	2
MAG311				1	1			1	1	1
MAG312			1	2
MAG313	1		1	2	1			1
MAG314	1			2					1	1
MAG315	1	1		1
MAG316	1			1					1	1
MAG317	3		1	1					1	1
MAG318	1			1
MAG319		1	1	1
MAG32	1		1	2		2
MAG320				1			1
MAG321	1
MAG322	1		1	1		1
MAG324	2
MAG325	1			1
MAG326	1			1		1
MAG328				1
MAG329	1			1
MAG33	1			1	1			1
MAG330	1		1	2	1	2
MAG331							1	1	1	1
MAG332							1
MAG333	1			1		1
MAG334				1		1
MAG335	1			1					1	1
MAG336	1
MAG337	1
MAG338	1
MAG339	1			2		1
MAG34	1			1			1
MAG340	1		1	1
MAG341	1
MAG342			1	2
MAG343	1			1	1
MAG344	1							1
MAG345	1
MAG346	1			1
MAG347	2			1					1	1
MAG348	1							2
MAG349			1	1
MAG35	1		1	1					1	1
MAG350						1
MAG351						1
MAG352	1			2	1			1
MAG353	1
MAG354				1			1		1	1
MAG355								1
MAG356			1	2	1	1
MAG357	2
MAG358	1
MAG359	1				1	1
MAG36	1		1	1		1
MAG360				1					1	1
MAG362	2								1	1
MAG363	1	1
MAG364				2		2
MAG365	2								1	1
MAG366	1		1	2
MAG367	1								1	1
MAG369	1					2
MAG37	1			1					1	1
MAG370				2	1			2
MAG371			1	1		2
MAG372	1			1
MAG373	1								1	1
MAG374				1	1			1
MAG376	1								1	1
MAG377	1	1	1	2		1
MAG378				1
MAG379	1			1
MAG38				1
MAG381	1			2		1
MAG383				1		1
MAG384	1			1
MAG385	1
MAG386			1	2	1
MAG387		1	1	2		1
MAG389	2			1					1	1
MAG39	2		1	1					1	1
MAG390	1
MAG391	1			1
MAG392				1
MAG394	1								1	1
MAG395	1					1
MAG396	1
MAG397				1
MAG398						1
MAG4	1			1					2	2
MAG40	2		1	1					1	1
MAG400				1
MAG401	1		1	1
MAG402	1
MAG403	2		1	1
MAG404	1			1
MAG407	1
MAG408	2
MAG409						1
MAG41	1		1	2	1	1		1
MAG411	1
MAG412	1
MAG413	2								1	1
MAG414			1	2		1
MAG416				1
MAG418	1		1	2
MAG419	1			1
MAG42	1			1	1				1	1
MAG420				1				1
MAG421			1	1	1	1
MAG422	1	1	1	2		1
MAG423				2	1	1
MAG424						1
MAG426	1		1	1
MAG428	1		1
MAG429	1
MAG43	1			1
MAG430	1			1
MAG431	1	1		1		1
MAG432				1
MAG44	1	1	1	1		1
MAG45	1								1	1
MAG46	1			1	1			1	1	1
MAG47	2		1	1					1	1
MAG48	1			1					1	1
MAG49	2		1	2					1	1
MAG5	2		1	2
MAG50				1
MAG51	1			2	1	1		1
MAG52	2								1	1
MAG53	2		1	1					1	1
MAG54	1			1
MAG55	1		1
MAG56	3			1					1	1
MAG57	1		1	2	1	1		1
MAG58				1	2			1
MAG59	1			1		1
MAG6				1
MAG60			1	1		1
MAG61	1			1
MAG62	1		1	1	1	2
MAG63				1		1
MAG64	1		1	2	1
MAG65	1	1	1	1			1		1	1
MAG66	2		1	2					1	1
MAG67	1		1	1					1	1
MAG68	1			1	1			1	1	1
MAG69	1		1	2
MAG7	1			1					1	1
MAG70	1		1	2					1	1
MAG71	1				1			1	1	1
MAG72	1			1
MAG73	1		1	3		1
MAG74	1			1
MAG76	1			1	1			1	1	1
MAG77	2		1	2					2	2
MAG78	1		1	2					1	1
MAG79	1	1	1	2	1	1		1
MAG8	2		1	1					2	2
MAG80	2		1	1					1	1
MAG81	2		1	1					1	1
MAG82	1			1	1			1	1	1
MAG83	1			1					1	1
MAG84	2								1	1
MAG85	2			1			1
MAG86	1			1
MAG87					1			1
MAG88	1			1				1
MAG89	1			1			1
MAG9	1
MAG90	1			2					2	2
MAG91	1		1	2					1	1
MAG92	2		1	2					1	1
MAG93	1		1	2					1	1
MAG94	2		1	1					1	1
MAG95	1		1	2		1
MAG96	1		1						1	1
MAG97	1			1		1
MAG98						1
MAG99	1		1	2		1
MAG114									1	1
MAG129									1	1
MAG135									1	1
MAG187									1	1
MAG399									1	1
MAG295					1

## Sheet: hydrogen metabolism
MAG	Fe	FeFeA1	FeFeA2	FeFeA3	FeFeA4	FeFeB	FeFeC1	FeFeC2	FeFeC3	hydB	NiFe1b	NiFe1d	NiFe3a	NiFe3c	NiFe4c	NiFe4e	NiFe4f	NiFe4g	NiFe4h	NiFe4i
MAG101				1						1
MAG105													1	2					2	1
MAG106				1						1
MAG110				1			1			2
MAG111				1						1
MAG112				1						1
MAG113				1						1
MAG117				1						1
MAG12				1						1
MAG120				1						1
MAG121						1												1
MAG122				1						1
MAG124				1						1
MAG125				1
MAG128				1			1			2
MAG129													1						1	1
MAG13						1		1
MAG130																		1
MAG131		1															1
MAG132						1
MAG133				1		1		1	1	1
MAG134						1		1
MAG136			1			1
MAG137			1															1
MAG14				1						1
MAG140				1		1				1
MAG141				1		1			1	1
MAG146				1		1		1
MAG147				1		1			1	1
MAG148										1
MAG15				1						1
MAG150						1
MAG152			1	1						1
MAG153						2
MAG157						1
MAG159				1			1
MAG16				1		1				2
MAG160						1		1
MAG161				1				1
MAG162						1										1
MAG163										1
MAG164										1
MAG166			1			1
MAG167										1
MAG168				2						2
MAG169				1														1
MAG17				1				1		1
MAG170							1
MAG171				1
MAG172						1										1
MAG175						1		1
MAG177				1						1
MAG178				1						1		1
MAG179						1
MAG180				1						1
MAG184											1
MAG185				1						1
MAG187	1																		1
MAG191										1
MAG193				1						1
MAG194								1
MAG196				1		1				1
MAG2						1			1	1
MAG20				1						1
MAG202						1
MAG204				1			1			1
MAG207				1						1
MAG208				1		1			1	1
MAG209						1
MAG212						1
MAG213			1
MAG214				1				1		2
MAG215				1
MAG218						1
MAG221							1
MAG223						1
MAG224			1	1						1
MAG226										1
MAG228						1										1
MAG229			1	1						2
MAG230									1									1
MAG231						1
MAG232				1						1
MAG233				1		1				1
MAG234				1		1				1
MAG235				1				1		1
MAG236						1
MAG238				2						2
MAG239						1
MAG24				1						1
MAG240																			1
MAG243				1		1				1
MAG244				1		1
MAG245			1	1
MAG246				1		1				1
MAG25																		1
MAG250				1						1
MAG251				1		1				2
MAG252				1		1				1
MAG254			1			1			1	2
MAG256						1												1
MAG257																2
MAG258								1		1
MAG259																1
MAG26				1						1
MAG261														1
MAG262																1
MAG264			1			1	1
MAG265				1						2
MAG270						1		1
MAG272																1
MAG275						1
MAG278						1
MAG282		1															1
MAG283				1						1
MAG287						1
MAG288										1
MAG289				2						1
MAG29				1				2		1
MAG290						1
MAG291								1
MAG293				1						1
MAG294								1		1
MAG295			1							1
MAG296						1
MAG297			1	1						1
MAG298				1			1			3
MAG30				1						1
MAG303						1												1
MAG306										1
MAG307			1			1										1
MAG308						1		1								1
MAG310										1
MAG311				1						1
MAG312						1
MAG313			1			1		1								1
MAG315								1
MAG318				1						2
MAG319						1
MAG32						2
MAG320		1		1						1
MAG322				1		1				1
MAG323			1							1
MAG325						1				1
MAG326				1						1
MAG327				1						1
MAG328								1
MAG33				1		1				1
MAG330		1				1										1
MAG331				1		1				1
MAG333										1
MAG334				1						1
MAG336				1						1
MAG339			1			1
MAG34												1
MAG340			1
MAG342				1			1
MAG346			1
MAG349						1
MAG352			1	1						1
MAG353								1
MAG355						1										1
MAG357										1
MAG358				1						1
MAG359																		1
MAG36				1			1			2
MAG361						1
MAG363				1		1				1
MAG364			1			1
MAG366						1
MAG369						1			1
MAG37				1						1
MAG370						1
MAG371				1				1
MAG375										1
MAG376															1
MAG377				1						1
MAG378				1
MAG38										1
MAG382								1
MAG386						1										1
MAG388				1						1
MAG393						1
MAG397				1		1				1
MAG398				1						1
MAG399																				1
MAG400				1						1
MAG401				1						1
MAG402			1		1
MAG404				3						2
MAG406							1			1
MAG409										1
MAG41						1
MAG410						1
MAG415				1		1		1	1	1
MAG416				1						1
MAG417						1
MAG418																1
MAG42				1						2
MAG420				1
MAG421						1			1	1
MAG422						1		1
MAG423						1
MAG424						1
MAG429						1		1
MAG43				1						1
MAG44				1						1
MAG46				1						1
MAG50				1						1
MAG51						2
MAG54				1						1
MAG55						1
MAG56				1						1
MAG57			1			1		1								1
MAG58			1			2	1
MAG59				1						1
MAG6				1						1
MAG60			1													1
MAG61										1
MAG62		1		1						1
MAG63								1
MAG64						1										1
MAG68				1						1
MAG69						1										1
MAG71				1						1
MAG72				1						1
MAG73						1
MAG75										1
MAG76										1
MAG79						1
MAG82				1						1
MAG86				1		1				1
MAG87				1						1
MAG88				1						1
MAG89		1		1						1		1
MAG9										1
MAG95				1						1
MAG97				1						1
MAG98						1
MAG99				2						2

## Sheet: methanogensis
MAG	McrA	mer	mtd
MAG105			1
MAG129		1	1
MAG187		1
MAG261	2
MAG399	2		1

## Sheet: reductive acetogenesis
MAG	AcsB	codH	CooS	fdhA
MAG105				1
MAG127		1	1	1
MAG129				1
MAG133		1	1
MAG158	1
MAG163				2
MAG164				1
MAG178		1	1
MAG189		1	1
MAG190				1
MAG196				1
MAG209		2	2
MAG211				1
MAG213		1	1
MAG233				2
MAG240				1
MAG242				1
MAG251				1
MAG257		1	1
MAG296				1
MAG320			1
MAG339				1
MAG340	1		1
MAG354		1	1
MAG356				1
MAG400	1	1	1
MAG415		1	1
MAG89		1	1
MAG9	2	1	1

## Sheet: nitrate ammonification
MAG	NarG	nirB	NrfA
MAG116			1
MAG178	1		1
MAG18			1
MAG184			1
MAG19			1
MAG242	1	1
MAG299			1
MAG34			1
MAG362			1
MAG376			1
MAG389			1
MAG43			1
MAG66			1
MAG78			1

## Sheet: sulfate reduction
MAG	aprA	AsrA	dmsA	DsrA
MAG153	1
MAG175	1
MAG178	1
MAG179		1
MAG189	1
MAG202		1
MAG209	1
MAG242			1
MAG32	1
MAG320	1
MAG330		1
MAG344	1
MAG370	1	1
MAG376		1		1
MAG414	1
MAG51	1
MAG58		1
MAG64		1
MAG69	1
MAG73	1	1
MAG79	1
MAG89	2
