# Supplementary material for: Distinct microbial hydrogen and reductant disposal pathways explain interbreed variations in ruminant methane yield
Source: Research Square preprint supplement (doi:10.21203/rs.3.rs-2831003/v1), 2024-04-11
Supplement: Supplementary file 11 [file ab40a0add6719e8a5c5acbd2.xlsx]

## Sheet: Sheet1
MAG	Jersey			Holstein			P	ADJ-P	Taxnonomy							Jersey	Jersey	Jersey	Jersey	Jersey	Jersey	Jersey	Jersey	Jersey	Jersey	Jersey	Jersey	Holstein	Holstein	Holstein	Holstein	Holstein	Holstein	Holstein	Holstein	Holstein	Holstein	Holstein	Holstein
	Average relative abundance	Standard deviation	Standard error of the mean	Average relative abundance	Standard deviation	Standard error of the mean			domain	phylum	class	order	family	genus	species	118	121	135	136	137	141	145	146	147	150	151	152	117	122	125	127	130	132	133	134	140	142	143	149
MAG1	3441.49	346.74	1201.15	2617.45	684.44	2370.97	0.119	0.162729	d__Bacteria	p__Firmicutes_A	c__Clostridia	o__Oscillospirales	f__Oscillospiraceae	g__CAG-110	s__	2891.07	5352.92	5512.19	1646.16	4069.47	3278.85	3127.18	3241.48	2307.13	3150.23	4469.3	2251.86	6123.85	2939.51	1101.85	790.78	834.38	7626.52	1337.9	412.29	726.61	3859.57	1444.8	4211.38
MAG10	6978.33	560.3	1940.94	4938.02	660.82	2289.14	0.0327	0.0526515	d__Bacteria	p__Bacteroidota	c__Bacteroidia	o__Bacteroidales	f__UBA932	g__RC9	s__	7940.95	7895.06	4135.5	4825.86	6244.18	6551.81	10110.1	10740.2	6610.46	6368.68	6619.86	5697.19	8892.11	4625.71	4497.38	2142.8	3666.3	7931.24	3047.46	2076.58	3357.14	7593.19	5075.84	6350.5
MAG100	3717.71	619.55	2146.19	546.57	197.47	684.04	0.0002	0.000712745	d__Bacteria	p__Firmicutes	c__Bacilli	o__Mycoplasmatales	f__Mycoplasmoidaceae	g__Malacoplasma_A	s__	5650.85	2109.58	2353.98	1364.26	3044.51	5196.59	1368.85	7253.56	5311.5	641.21	5411.23	4906.44	237.69	158.3	127.93	60.56	1593.5	455.8	75.57	358.81	62.74	1286.42	122.88	2018.65
MAG101	22191.1	2242.47	7768.14	8459.8	1557.54	5395.48	0.0002	0.000847995	d__Bacteria	p__Bacteroidota	c__Bacteroidia	o__Bacteroidales	f__Muribaculaceae	g__C941	s__C941 sp900320055	20789.9	20122.1	30380.4	16077.7	23928	39742.6	14131	25661.1	17011.4	27231.3	11993.8	19223.5	4267.26	11731.4	8048.04	3611.49	13150.2	2604.7	8913.95	2959.73	5548.59	21232.8	7893.89	11555.7
MAG102	11487.5	2687.43	9309.53	790.17	221.83	768.44	<.0001	0.000417244	d__Bacteria	p__Bacteroidota	c__Bacteroidia	o__Bacteroidales	f__UBA932	g__RC9	s__	17226.7	10526	4512.54	6489.02	6380.99	5162.88	4791.64	11216.4	28424.8	3012.86	30763.6	9342.42	565.2	539.45	621.9	211.87	1232.98	347.71	264.94	255.15	215.53	2672.2	678.39	1876.71
MAG103	6526.09	2027.65	7023.99	403.81	101.98	353.27	<.0001	0.000417244	d__Bacteria	p__Bacteroidota	c__Bacteroidia	o__Bacteroidales	f__UBA932	g__RC9	s__RC9 sp900320795	2195.24	22848.3	5752.71	2304.43	3080.27	2195.02	4027.03	2820.58	15995	1131.2	13704.3	2258.94	305.01	326.56	478.26	123.83	499.52	230.88	187.38	138.57	139.38	1365.04	309.67	741.63
MAG104	9327.43	1060.89	3675.02	1684.57	431.07	1493.25	<.0001	0.000417244	d__Bacteria	p__Bacteroidota	c__Bacteroidia	o__Bacteroidales	f__Bacteroidaceae	g__UBA4372	s__	9010.07	13353.5	5584.2	7644.38	8751.8	7879.5	6040.66	6183.33	16944.2	5828.15	10993.8	13715.5	1407.66	1617.51	1232.1	464.27	3119.02	1284.96	662.33	489.38	426.33	5286.89	859.92	3364.48
MAG105	2365.46	993.1	3440.22	232.02	117.66	407.6	0.0003	0.000944584	d__Archaea	p__Methanobacteriota	c__Methanobacteria	o__Methanobacteriales	f__Methanobacteriaceae	g__Methanobrevibacter_A	s__Methanobrevibacter_A sp900313645	454.29	876.77	1230.61	349.69	788.33	865.44	920.6	833.57	12100.8	924.62	5871.91	3168.8	65.49	90.96	90.88	59.95	161.32	123.18	62.52	66.26	58.15	1507.34	255.1	243.05
MAG106	8512.02	3078.56	10664.4	587.54	146.78	508.45	<.0001	0.000417244	d__Bacteria	p__Firmicutes_A	c__Clostridia	o__Lachnospirales	f__Lachnospiraceae	g__CAG-791	s__	3437.28	4107.34	5512.4	2338.81	1500.61	2030.71	38153.1	10762	18308	1112.53	11374	3507.47	499.11	432.8	575.37	60.95	544.26	619.72	280.37	223.34	286.31	2002.42	488.62	1037.24
MAG107	7170.98	861.28	2983.58	1450.84	463.3	1604.92	0.0001	0.000557131	d__Bacteria	p__Bacteroidota	c__Bacteroidia	o__Bacteroidales	f__UBA932	g__RC9	s__	8642.9	4740.19	6550.12	7924.16	5461.88	10340.8	4624.17	4571.63	14679.5	4716.38	7154.02	6645.97	699.43	643.14	1690.93	510.26	1898.82	1419.58	366.22	347.26	298.35	5912.22	790.87	2833.05
MAG108	20848	3342.7	11579.5	16834.6	5553	19236.2	0.1659	0.213244	d__Bacteria	p__Bacteroidota	c__Bacteroidia	o__Bacteroidales	f__Bacteroidaceae	g__Prevotella	s__	40679	8008.71	3060.66	12177	20436.2	9505.29	33526.3	33996.2	25786.2	24374.9	16053.1	22572.1	9849.81	10261.5	16154.8	4460.17	14782.8	6579.98	3462.45	13316	2911.67	73097.9	29654.5	17483.2
MAG109	3803.57	1871.61	6483.43	286.8	93.34	323.33	0.0003	0.00110952	d__Bacteria	p__Firmicutes	c__Bacilli	o__Mycoplasmatales	f__Mycoplasmoidaceae	g__Malacoplasma_A	s__Malacoplasma_A sp900316595	1505.91	1961.69	443.74	320.57	1261.52	1514.12	1051.25	2273.68	23024.5	530.22	2722.79	9032.89	83.78	78.26	198.45	57.56	241.13	617.47	93.72	152.36	64.75	1131.62	182.39	540.15
MAG11	3879.76	233.3	808.17	19377.6	9671.46	33502.9	0.1333	0.177222	d__Bacteria	p__Bacteroidota	c__Bacteroidia	o__Bacteroidales	f__Bacteroidaceae	g__Prevotella	s__Prevotella sp900314655	4739.61	4151.89	4411.93	5289.62	3590.59	4928.75	3145.19	2815.86	3585.17	3613.1	3126.76	3158.7	20436.6	2078.34	2377.31	20751.3	3929.52	4971.13	33309	121118	10563.7	3217.95	6569.21	3209.53
MAG110	5129.72	1397.01	4839.39	1426.24	536.05	1856.93	0.0022	0.00459767	d__Bacteria	p__Firmicutes_A	c__Clostridia	o__Oscillospirales	f__Acutalibacteraceae	g__Ruminococcus_E	s__Ruminococcus_E sp900316555	2359.84	1074.19	2922.54	3822.95	1662.65	3849.59	7794.43	3294.93	19266.4	3771.73	5934.57	5802.81	695.12	1281.79	724.65	41.26	3565.06	1639.67	138.92	87.55	98.06	6307.29	475.29	2060.21
MAG111	4560.5	1304.65	4519.42	750.13	131.76	456.42	<.0001	0.000480481	d__Bacteria	p__Firmicutes_A	c__Clostridia	o__Oscillospirales	f__Oscillospiraceae	g__UBA2922	s__	4348.02	6241.02	3323.72	1365.64	1749.47	4191.13	3804.35	2126.37	18134.9	1802.31	2686.63	4952.49	646.32	924.82	617.65	256.31	1026.2	364.16	542.41	505.25	472.32	1972.21	643.67	1030.25
MAG112	5258.31	687.62	2381.99	1623.47	250.67	868.35	<.0001	0.000480481	d__Bacteria	p__Firmicutes_A	c__Clostridia	o__Oscillospirales	f__Oscillospiraceae	g__CAG-110	s__CAG-110 sp900315595	3674.71	4456.27	7748.69	3890.91	3759.42	3956.12	2509.19	7187.9	10870	4827.25	6566.71	3652.58	2648.87	3162.9	968.95	1537.38	1254.24	1248.55	664.05	396.08	1166.45	2815.72	1678.96	1939.54
MAG113	251.34	28.94	100.27	895.21	779.79	2701.26	0.0094	0.0169452	d__Bacteria	p__Firmicutes	c__Bacilli	o__RFN20	f__CAG-826	g__UBA3207	s__UBA3207 sp900314585	255.36	386.36	113.27	154.69	404.6	177.3	191.57	286.93	398.58	183.41	192.73	271.24	30.35	173.34	88.15	17.36	159.4	150.12	97.21	56.96	10.55	376.75	115.19	9467.12
MAG114	9504.21	1080.74	3743.78	4035.82	658.57	2281.37	0.0003	0.000944584	d__Bacteria	p__Bacteroidota	c__Bacteroidia	o__Bacteroidales	f__UBA932	g__RC9	s__RC9 sp002396335	6986.13	8298.16	5258.25	9110.42	10379.7	10403.1	9692.76	9971.16	10246.1	5847.85	19982.4	7874.41	4543.3	3269.95	5666.44	1865.64	3020.29	1550.45	2190.92	3055.77	1804.3	5707.18	7585.08	8170.47
MAG115	2175.77	1235.64	4280.37	2498.49	601.24	2082.75	0.0833	0.119107	d__Bacteria	p__Firmicutes_A	c__Clostridia	o__Lachnospirales	f__Lachnospiraceae	g__UBA3212	s__UBA3212 sp002363615	329.16	334.67	15532.1	1413.68	1248.13	937.34	472.28	1675.32	28.43	2828.07	127.81	1182.22	3202.82	3632.19	3210.75	1128.36	2637.22	2631.38	1128.52	672.21	1089.71	698.69	1749.27	8200.77
MAG116	2049.93	159.75	553.39	4022.99	1485.35	5145.41	0.4189	0.48004	d__Bacteria	p__Bacteroidota	c__Bacteroidia	o__Bacteroidales	f__UBA932	g__RC9	s__	2121.68	3159.63	1578.07	1498.29	1784.81	2228.38	1576.81	1942.22	2391.24	1761.23	2972.43	1584.38	3931.34	2524.91	1599.57	1180.74	964.16	1521.39	2400.1	1967.12	3509.39	7485.24	1824.17	19367.8
MAG117	7110.8	1205.23	4175.03	7956.18	1771.03	6135.03	0.8174	0.840715	d__Bacteria	p__Bacteroidota	c__Bacteroidia	o__Bacteroidales	f__Muribaculaceae	g__C941	s__C941 sp900316835	6173.18	1522.1	2668.1	17436.8	8248.81	9070.05	6999.15	9460.59	6547.08	3009.05	8748.67	5446.06	1691.07	2312.51	3446.67	1588.75	11403.6	15305.6	5722.76	3348.24	11642.4	7717.62	10263.9	21031
MAG118	2975.94	400.64	1387.86	9363.69	4449.02	15411.9	0.6033	0.640391	d__Bacteria	p__Bacteroidota	c__Bacteroidia	o__Bacteroidales	f__Bacteroidaceae	g__Prevotella	s__	3290.85	3639.95	1262.4	3582.89	2539.99	1947.09	2992.67	6793.51	2667.81	2582.04	2411.64	2000.39	53576.3	11586.3	7551.39	425.22	3912.35	887.08	558.91	593.33	385	3674.41	6065.31	23148.5
MAG119	470.66	89.29	309.3	1848.92	290.35	1005.8	<.0001	0.000417244	d__Bacteria	p__Bacteroidota	c__Bacteroidia	o__Bacteroidales	f__UBA932	g__RC9	s__RC9 sp900320385	413.68	576.83	162.16	222.81	511.61	184.57	367.17	1242.66	305.87	678.17	246.32	736.1	1400.9	1348.28	817.26	1998.06	1110.92	2583.44	1292.81	1518.8	2093.17	1844.44	1516.31	4662.7
MAG12	8203.59	1651.23	5720.04	3652.59	721.19	2498.27	0.0067	0.0124489	d__Bacteria	p__Bacteroidota	c__Bacteroidia	o__Bacteroidales	f__P3	g__UBA1711	s__UBA1711 sp002372855	6017.33	24310.9	6341.21	3629.21	5734.26	3267.85	8105.84	10781	5494.26	11873.7	8337.42	4550.07	9429.96	6399.84	3309.19	1440.64	5983.45	3293.69	1708.93	1069.57	1463.86	3255.16	4079.69	2397.1
MAG120	4313.62	443.78	1537.3	1538.05	223.43	773.97	<.0001	0.00051826	d__Bacteria	p__Firmicutes_A	c__Clostridia	o__Oscillospirales	f__Oscillospiraceae	g__CAG-110	s__CAG-110 sp900315595	3327.77	3750.94	7814.26	3780.65	3027.87	3395.93	2426.46	5090.49	5583.99	4872.13	5684.58	3008.33	3098.38	2495.01	1106.63	1788.67	1067.71	1061.58	621.69	347.5	1751	1908.62	1389.16	1820.65
MAG121	10816.2	1970.86	6827.26	292.15	110.85	384.01	<.0001	0.000417244	d__Bacteria	p__Firmicutes_A	c__Clostridia	o__Oscillospirales	f__Oscillospiraceae	g__NK3B98	s__NK3B98 sp900314485	6220.56	2734.09	7000.47	14765.1	14984.3	16065	9188.16	6332.12	3263.32	25951.7	7119.81	16169.6	102.77	145.96	369.56	43.7	1168.98	95.46	58.19	60	93.37	1007.02	128.26	232.47
MAG122	1844.09	751.63	2603.73	365.33	66.04	228.77	0.0002	0.000712745	d__Bacteria	p__Bacteroidota	c__Bacteroidia	o__Bacteroidales	f__Muribaculaceae	g__C941	s__	804.64	954.67	1530.38	986.73	848.47	3614.1	717.6	621.68	839.22	9691.94	884.27	635.33	176.49	439.97	439.9	137.74	505.63	249.28	298.36	186.05	197.98	941.84	257.43	553.25
MAG123	13748	2480.97	8594.32	13371.7	3291.86	11403.3	0.6442	0.675437	d__Bacteria	p__Bacteroidota	c__Bacteroidia	o__Bacteroidales	f__Bacteroidaceae	g__Prevotella	s__	9379.98	11892.8	7740.48	9261.57	12383.7	21868	7350.47	7657.34	7281.27	35421.5	22376.1	12362.3	3588.92	16887.6	19729.8	3049.29	15299.1	10853.4	1926.46	3811.01	811.32	33922.8	31562.5	19017.7
MAG124	11529.9	3476.32	12042.3	494.47	99.62	345.1	<.0001	0.000417244	d__Bacteria	p__Bacteroidota	c__Bacteroidia	o__Bacteroidales	f__P3	g__UBA1711	s__	2071.55	3328.36	1447.84	1922.69	4999.63	4007.34	15650.7	15015.6	24829.7	2293.48	25709.5	37081.9	423.77	878.57	918.91	92.92	813.45	252.93	221.92	110.49	132.85	757.39	368.54	961.93
MAG125	6483.37	1303.77	4516.39	1236.95	272.99	945.65	<.0001	0.000417244	d__Bacteria	p__Firmicutes_A	c__Clostridia	o__Oscillospirales	f__Oscillospiraceae	g__CAG-110	s__	3580.38	6966.05	14595.3	2855.73	6895.94	4084.42	4060.22	4475.72	6464.65	3639.98	16679.2	3502.8	1982.08	1371.93	1329.5	319.72	651.56	762.75	518.29	242.44	600.37	2283.46	1347.08	3434.18
MAG126	5007.52	1023.72	3546.27	668.02	200.26	693.72	0.0001	0.000617624	d__Bacteria	p__Firmicutes	c__Bacilli	o__Mycoplasmatales	f__Mycoplasmoidaceae	g__Malacoplasma_A	s__	11129.9	3174.65	2038.06	2153.37	4471.56	5835.39	1591.6	6355.56	4570.96	1173.3	12148	5447.92	321.45	165.57	185.04	112.24	1747.85	1189.04	111.1	723.94	61.87	1075.65	264.6	2057.94
MAG127	12366.6	3072.78	10644.4	2693.44	1412.83	4894.19	0.0015	0.00336637	d__Bacteria	p__Proteobacteria	c__Gammaproteobacteria	o__Enterobacterales	f__Succinivibrionaceae	g__UBA2804	s__UBA2804 sp900319705	6326.48	22618.1	6818.92	29135.4	31802.1	2387.77	10434.5	2995.83	1604.17	13392.5	3383.37	17500	4830.99	362.79	1907.69	430.61	17346.3	110.18	443.33	945.63	593.28	4524.47	616.9	209.08
MAG128	6082	1135.56	3933.69	1736.33	732.01	2535.77	0.0018	0.00393711	d__Bacteria	p__Firmicutes_A	c__Clostridia	o__Oscillospirales	f__Acutalibacteraceae	g__Ruminococcus_E	s__Ruminococcus_E sp900316555	3021.88	1189.58	3957.39	5488.32	2130.98	5310.4	10982.2	4468.92	14827.1	4805.63	7972.42	8829.19	670.43	1166.09	998.87	16.11	5421.99	1701.16	117.3	60.95	82.48	8236.51	423.28	1940.8
MAG129	4767.4	909.77	3151.53	268.18	95.18	329.73	<.0001	0.000417244	d__Archaea	p__Methanobacteriota	c__Methanobacteria	o__Methanobacteriales	f__Methanobacteriaceae	g__Methanobrevibacter_A	s__Methanobrevibacter_A sp900319535	6582.67	3170.46	2829.85	2288.34	2202.4	5268.81	3866.94	3141.81	11165.4	1849.07	4284.29	10558.8	163.91	102.65	111.72	66.05	638.54	151.02	72.6	137.16	52.86	1180.82	212.51	328.35
MAG13	262.92	47.57	164.78	848.5	397.93	1378.46	0.0008	0.00202795	d__Bacteria	p__Firmicutes_A	c__Clostridia	o__Lachnospirales	f__Lachnospiraceae	g__TF01-11	s__	174.57	184.25	769.81	180.37	238.18	216.5	244.01	200.83	192.31	326.78	209.69	217.75	5202.15	549.97	367.75	405.06	380.93	410.08	327.67	495	408.81	229.25	657.7	747.59
MAG130	579.54	48.48	167.95	173.41	35.41	122.65	<.0001	0.00051826	d__Bacteria	p__Firmicutes_A	c__Clostridia	o__Lachnospirales	f__Lachnospiraceae	g__CAG-791	s__	534.32	510.81	585.72	409.3	644.43	942.53	488.65	394.94	721.38	648.05	353.07	721.23	102.27	123.54	164.27	54.94	265.36	134.43	68.62	67.58	105.35	401.8	185.45	407.32
MAG131	1115.43	239.72	830.4	240.34	71.94	249.19	0.0005	0.00147325	d__Bacteria	p__Firmicutes_C	c__Negativicutes	o__Selenomonadales	f__Selenomonadaceae	g__Anaerovibrio	s__	3338	204.34	1419.46	1754.66	905.71	510.59	739.48	989.87	603.07	687.09	1504.63	728.26	238.34	336	408.57	23.26	554.39	66.13	10.14	43.44	22.27	805.37	135.74	240.48
MAG132	209.06	51.91	179.83	315.52	85.55	296.35	0.6442	0.675437	d__Bacteria	p__Spirochaetota	c__Spirochaetia	o__Treponematales	f__Treponemataceae	g__Treponema_D	s__	32.14	345.83	176.92	88.96	615.53	133.08	168.12	267.98	19.24	125.97	88.1	446.9	263.14	768.07	526.54	38.98	503.01	843.15	50.09	88.72	17.69	159.83	58.92	468.13
MAG133	768.86	268.87	931.38	571.45	127.32	441.04	1	1	d__Bacteria	p__Firmicutes_A	c__Clostridia	o__Oscillospirales	f__Ruminococcaceae	g__Ruminococcus_D	s__	928.43	369.1	3396.82	1072.21	589.74	1366.42	165.69	203.13	47.7	780.01	89.59	217.44	1397.38	429.92	486.78	193.29	441.2	741.22	236.45	140.43	529.74	121.02	722.26	1417.71
MAG134	281.62	82.76	286.7	309.98	226.91	786.03	0.1333	0.177222	d__Bacteria	p__Firmicutes_A	c__Clostridia	o__Oscillospirales	f__Ruminococcaceae	g__CAG-353	s__	246.21	787.47	404.38	770.29	596.16	88.96	87.99	37.72	31.18	182.6	53.78	92.74	150.47	88.74	182.71	13.94	182.9	2796.4	12.93	7.83	17.25	35.18	74.94	156.43
MAG135	1997.71	519.44	1799.39	178.27	64.7	224.12	0.0002	0.000847995	d__Bacteria	p__Proteobacteria	c__Gammaproteobacteria	o__Enterobacterales	f__Succinivibrionaceae	g__Succinivibrio	s__Succinivibrio sp900317105	3324.18	3986.04	774.94	3617.92	3210.54	393.59	207.99	662.07	830.9	1099.35	399.18	5465.78	185.58	137.51	359.51	12.13	735.18	43.03	10.4	19.65	7.21	432.85	69.42	126.78
MAG136	22.5	3.71	12.84	512.36	140.59	487.03	<.0001	0.000417244	d__Bacteria	p__Firmicutes_A	c__Clostridia	o__Lachnospirales	f__Lachnospiraceae	g__Lachnospira	s__Lachnospira eligens_B	15.33	22.05	40.94	17.56	19.33	35.83	28.46	12.43	8.74	47.16	8.38	13.78	179.55	41.29	1634.95	863.08	257.7	138.93	801.12	393	1087.62	164.31	146.09	440.68
MAG137	765.18	153.89	533.09	130.42	26.99	93.5	<.0001	0.000417244	d__Bacteria	p__Firmicutes_A	c__Clostridia	o__Lachnospirales	f__Lachnospiraceae	g__	s__	656.64	587.53	786.84	740.53	430.41	2311.34	681.61	412.02	945.29	243.79	950.49	435.7	172.01	121.4	157.98	28.17	139.77	250.7	50.12	24	44	295.34	51.52	230.01
MAG138	1291.76	187.25	648.65	1933.98	236.3	818.56	0.0647	0.0970075	d__Bacteria	p__Firmicutes_A	c__Clostridia	o__TANB77	f__CAG-508	g__CAG-793	s__	930.27	378.32	1015.31	757.56	1108.16	2235.72	1835.93	1672.35	2132.46	1023.25	450.22	1961.54	1887.74	1882.7	3332.65	1386.43	1768.73	1409.91	1398.57	3125.09	1240.23	2574.35	2597.88	603.5
MAG139	556.5	44.06	152.63	173.52	27.95	96.84	<.0001	0.000417244	d__Bacteria	p__Firmicutes_A	c__Clostridia	o__Lachnospirales	f__Lachnospiraceae	g__CAG-791	s__CAG-791 sp002449595	599.79	320.64	488.33	469.51	800.21	739.92	435.53	533.13	545.47	512.62	430.55	802.25	116.12	132.22	125.39	63.62	172.69	118.82	111.77	83.16	385.47	299.06	232.09	241.85
MAG14	4462.71	921.31	3191.51	3112.43	487.05	1687.2	0.3556	0.422044	d__Bacteria	p__Bacteroidota	c__Bacteroidia	o__Bacteroidales	f__UBA932	g__RC9	s__	3701.59	4201.91	2556.33	1619.92	4869.18	1864.76	11761.2	9620.8	1449.33	3195.83	5400.82	3310.93	4580.51	3275.39	2880.2	1073.05	3924.25	2024.07	2681.91	944.97	1123.55	5159.57	3414.24	6267.42
MAG140	2365.04	323.25	1119.76	267.35	58.47	202.54	<.0001	0.000417244	d__Bacteria	p__Firmicutes_A	c__Clostridia	o__Oscillospirales	f__Oscillospiraceae	g__UBA1777	s__	869.67	3616.56	4330.72	3138.25	1358.59	1308.33	3372.56	1573.91	3097.22	1554.14	2528.6	1631.98	129.66	172.2	526.72	65.37	213.33	129.65	67.43	323.88	174.71	418.79	251.85	734.66
MAG141	818.53	306.09	1060.34	533.43	180.94	626.79	0.6442	0.675437	d__Bacteria	p__Eremiobacterota	c__UBP9	o__UBA4705	f__UBA4705	g__UBA4705	s__UBA4705 sp900313515	976.22	509.81	288.91	22.33	1325.73	6.81	1323.84	951.5	14.83	3800.07	492.05	110.2	450.76	68.93	239.85	134.79	2379.48	853.13	430.51	189.99	177.64	415.97	336.61	723.45
MAG142	1089.18	88.35	306.05	345.64	54.45	188.63	<.0001	0.000417244	d__Bacteria	p__Firmicutes_A	c__Clostridia	o__Oscillospirales	f__Oscillospiraceae	g__	s__	1021.63	1387.75	1295.09	597.9	892.32	1464.26	968.2	944.29	1619.17	758.41	1211.98	909.1	467.99	447.27	245.95	84.82	327.98	398.75	219.48	110.11	246.99	721.38	287.68	589.24
MAG143	559.37	115.5	400.09	383.67	48.74	168.84	0.4529	0.510866	d__Bacteria	p__Bacteroidota	c__Bacteroidia	o__Bacteroidales	f__UBA932	g__RC9	s__RC9 sp002350615	343.22	598.1	225.07	132.43	567.04	331.41	1157.95	1394.74	185.51	692.35	266.29	818.3	144.65	609.87	225.83	325.83	681.91	566.32	333.77	403.95	379.49	185.81	452.16	294.47
MAG144	932.68	211.35	732.14	31.25	16.97	58.79	<.0001	0.000417244	d__Bacteria	p__Firmicutes_A	c__Clostridia	o__Oscillospirales	f__Acutalibacteraceae	g__RUG592	s__RUG592 sp900320535	941.16	1363.15	438.36	2300.43	849.2	1579.47	593.62	177.63	232.55	270.57	2056.18	389.85	16.08	9.86	13.13	4.79	24.56	14.79	4.2	1.85	4.58	214.48	26.34	40.28
MAG145	1029.1	326.03	1129.39	98.52	15.78	54.67	<.0001	0.000417244	d__Bacteria	p__Firmicutes_A	c__Clostridia	o__Lachnospirales	f__Lachnospiraceae	g__Eubacterium_Q	s__Eubacterium_Q ruminantium	741.51	328.29	2521.67	1240.61	245.96	3943.77	655.75	882.18	165.47	1082.61	359.86	181.57	85.15	135.89	214.96	70.83	63.02	107.58	56.37	35.78	37.58	74.65	162.19	138.27
MAG146	774.9	138.93	481.28	478.42	141.39	489.79	0.0496	0.0760553	d__Bacteria	p__Firmicutes_A	c__Clostridia	o__Lachnospirales	f__Lachnospiraceae	g__AC2028	s__	788.11	694.97	1983.62	683.54	916.91	1397.68	621.22	421.9	423.53	657.74	467.89	241.68	766.32	407.96	250.33	83.15	263.01	1574.25	144.03	36.56	55.67	649.66	292.81	1217.31
MAG147	782.29	148.24	513.5	279.63	53.92	186.8	0.0015	0.00336637	d__Bacteria	p__Firmicutes	c__Bacilli	o__Erysipelotrichales	f__Erysipelotrichaceae	g__	s__	760.37	196.83	358.01	497.32	719.09	1898.12	559.1	493.45	1594.79	382.15	1081.09	847.21	268.47	177.1	178.64	155.11	202.78	337.48	206.76	139.15	198.51	813.63	254.12	423.84
MAG148	698.7	97.22	336.77	338.86	73.81	255.7	0.0047	0.00900475	d__Bacteria	p__Firmicutes_A	c__Clostridia	o__Lachnospirales	f__Lachnospiraceae	g__UBA1267	s__	978.49	1141.28	1266.6	230.07	593.98	436.34	258.12	507.89	874.02	453.96	823.28	820.31	714.99	371.81	150.64	115.43	202.96	386.53	329.8	103.59	170	935.04	176.7	408.84
MAG149	471.77	149.02	516.22	190.79	147.55	511.13	0.0018	0.00393711	d__Bacteria	p__Proteobacteria	c__Alphaproteobacteria	o__UBA3830	f__UBA3830	g__UBA3830	s__	1585.52	353.95	68.16	188.53	619.41	1428.35	120.59	142.47	66.98	158.89	422.67	505.72	38.29	1807.79	105.52	10.37	31.82	23.66	10.12	12.81	2.77	153.61	50.81	41.9
MAG15	4207.06	765.75	2652.63	1100.9	218.54	757.03	0.0002	0.000712745	d__Bacteria	p__Bacteroidota	c__Bacteroidia	o__Bacteroidales	f__UBA932	g__RC9	s__RC9 sp900320185	8593.29	2787.16	1757.22	1575.37	9830.84	3136.31	5765.24	4920.38	2435.38	4079.92	2352.61	3250.98	532.22	677.26	1605.06	503.58	3139.8	1416.72	706.19	506.05	537.15	1255.23	973.9	1357.68
MAG150	124.78	42.97	148.86	460.33	111.49	386.2	0.0047	0.00900475	d__Bacteria	p__Firmicutes_A	c__Clostridia	o__Lachnospirales	f__Lachnospiraceae	g__CAG-590	s__	119.39	56.39	423.78	48.58	115.36	134.25	28.23	30.1	15.27	439.87	24.02	62.08	754.6	449.4	243.86	222.28	114.65	1111.92	383.57	87.37	206.26	63.77	1134.61	751.72
MAG151	7.41	1.59	5.5	300.3	156.48	542.06	0.0734	0.108351	d__Bacteria	p__Actinobacteriota	c__Actinomycetia	o__Actinomycetales	f__Bifidobacteriaceae	g__Pseudoscardovia	s__Pseudoscardovia suis	16.02	15.98	5.42	1.63	5.76	9.78	3.06	2.64	4.12	15.6	3.44	5.42	1753.56	75.38	4.27	2.14	683.73	7.57	863.83	29.4	1.43	48.94	128.43	4.86
MAG152	670.75	106.96	370.5	633.17	82	284.05	0.954	0.958397	d__Bacteria	p__Firmicutes_A	c__Clostridia	o__Oscillospirales	f__Acutalibacteraceae	g__	s__	411.26	829.38	1654.13	196.09	876.48	415.66	533.74	662.81	376.75	779.68	645.74	667.32	876.44	1067.24	581.58	536.24	745.61	330.45	559.83	222.3	420.17	733.01	401.69	1123.53
MAG153	34.99	3.12	10.8	437.89	158.88	550.36	<.0001	0.000417244	d__Bacteria	p__Firmicutes_A	c__Clostridia	o__Lachnospirales	f__Lachnospiraceae	g__Lachnobacterium	s__	42.86	16.21	41.74	29.93	28.19	44.14	35.21	23.71	48.11	52.04	29.93	27.82	877.66	293.21	140.03	514.53	56.44	203.44	459.62	204.17	74.02	46.29	2011.9	373.35
MAG154	2589.62	334.43	1158.49	430.78	181.44	628.53	0.0001	0.000617624	d__Bacteria	p__Bacteroidota	c__Bacteroidia	o__Bacteroidales	f__Muribaculaceae	g__C941	s__	4790.05	2933.86	4257.6	1911.78	1809.09	2454.83	1343.94	1977.52	2638.71	1094.27	3807.8	2055.97	103.63	259.73	555.19	60.46	705.43	82.87	141.24	92.92	83.29	2271.89	132	680.72
MAG155	2386.94	598.22	2072.28	80.25	33.31	115.38	<.0001	0.000417244	d__Bacteria	p__Spirochaetota	c__Spirochaetia	o__Treponematales	f__Treponemataceae	g__Treponema_D	s__	1586.97	1506.44	783.01	2177.43	1464.08	556.75	8027.6	3784.69	970.38	1419.4	3898.54	2467.95	52.65	24.52	48.31	2.84	160.82	307.43	5.05	9.67	5.03	310.75	6.65	29.23
MAG156	958.5	183.99	637.35	536.92	71.09	246.25	0.0833	0.119107	d__Bacteria	p__Bacteroidota	c__Bacteroidia	o__Bacteroidales	f__UBA932	g__RC9	s__	1219	725.92	264.98	847.63	2056.57	396.86	822.31	1526.83	412.6	620.75	485.94	2122.57	501.26	538.49	1015.96	379.95	599.83	1036.59	429.92	467.31	343.27	242.39	453.98	434.05
MAG157	93.25	9.89	34.27	334.15	62.84	217.69	0.0001	0.000617624	d__Bacteria	p__Spirochaetota	c__Spirochaetia	o__Treponematales	f__Treponemataceae	g__Treponema_D	s__Treponema_D sp003447785	69.3	134.82	83.65	82.43	149.81	78.1	129.32	118.31	47.97	61.12	52.81	111.4	123	490.05	180.25	623.32	120.82	435	393.88	795.93	291.43	160.65	156.25	239.16
MAG158	473.95	50.57	175.19	271.72	42.03	145.61	0.013	0.0230917	d__Bacteria	p__Firmicutes_A	c__Clostridia	o__Peptostreptococcales	f__Anaerovoracaceae	g__UBA1764	s__	369.73	151.63	357.56	250.72	473.29	800.95	556.49	545.26	651.55	568.24	488.61	473.38	279.37	229.34	241.58	168.16	191.06	267.13	158.02	120.61	191.64	370.76	386.44	656.51
MAG159	956.79	149.21	516.86	190.59	50.73	175.73	0.0001	0.000617624	d__Bacteria	p__Firmicutes_A	c__Clostridia	o__Lachnospirales	f__Lachnospiraceae	g__UBA3774	s__	710.33	837.38	1907.37	713.95	581.64	1445.05	609.46	399.25	1576.1	401.05	1552.09	747.84	203.37	169.71	174	41.09	192.64	98.5	76.37	22.18	54.7	452.73	187.68	614.13
MAG16	6750.09	792.06	2743.77	1630.82	214.53	743.16	<.0001	0.000417244	d__Bacteria	p__Firmicutes_A	c__Clostridia	o__Oscillospirales	f__Oscillospiraceae	g__CAG-110	s__CAG-110 sp900315595	12262.4	6203.96	10512	6724.53	4394.72	8871.03	3570.99	5269.27	7385.76	4368.81	7645.98	3791.69	2745.28	2720.44	1370.7	1401.68	1466.08	1281.21	705.38	394.13	1597.05	2360.07	1304.52	2223.32
MAG160	102.34	13.43	46.53	1279.89	263.49	912.74	0.0003	0.000944584	d__Bacteria	p__Firmicutes_A	c__Clostridia	o__Lachnospirales	f__Lachnospiraceae	g__Agathobacter	s__Agathobacter sp900552085	61.41	72.89	86.78	97.87	59.02	104.67	110.92	147.9	205.62	150.28	40.05	90.69	1403.34	158.78	2074.78	1343.75	633.38	3403.51	1448.3	1266.02	957.97	78.48	1908.47	681.88
MAG161	363.76	104.79	363	2698.74	939.01	3252.82	0.0003	0.00110952	d__Bacteria	p__Firmicutes_A	c__Clostridia	o__Oscillospirales	f__Ruminococcaceae	g__Ruminococcus_D	s__	247.35	232.94	1126.58	198.83	126.8	297.5	292.75	483.14	51	1076.25	144.56	87.38	7942.22	3005.38	1545.49	1033.69	792.23	868.62	1151.67	998.96	1594.53	863.2	1712.66	10876.2
MAG162	203.27	52.18	180.77	253.6	65.65	227.41	0.6442	0.675437	d__Bacteria	p__Firmicutes_A	c__Clostridia	o__Lachnospirales	f__Lachnospiraceae	g__NK4A136	s__	50.93	322.3	578.01	350.67	401.05	111.42	79.74	63.24	24.74	304.76	37.14	115.26	406.52	226.12	235.11	43.81	273.48	209.94	102.05	62.93	47.56	82.44	744.15	609.1
MAG163	449.93	70.88	245.53	370.92	75.55	261.73	0.3263	0.390533	d__Bacteria	p__Firmicutes_A	c__Clostridia	o__Lachnospirales	f__Lachnospiraceae	g__Eubacterium_Q	s__	414.98	352.06	644.4	842.73	465.31	605.53	149.5	418.05	62.23	838.48	304.61	301.26	168.57	688.46	383.32	479.26	303.77	275.63	175.61	90.71	187.27	323.82	345.64	1028.95
MAG164	747.08	113.64	393.67	713.2	217.46	753.3	0.2987	0.361449	d__Bacteria	p__Firmicutes_A	c__Clostridia	o__Lachnospirales	f__Lachnospiraceae	g__Eubacterium_Q	s__	1039.43	1107.63	1275.75	1139.57	592.42	915.38	244.45	548.58	210.25	415	1133.71	342.74	981.48	695.03	353.49	13.32	151.6	1562.97	369.25	494.29	1035.52	210.09	82.77	2608.55
MAG165	1575.16	104.89	363.37	874.2	94.79	328.35	0.0007	0.00172365	d__Bacteria	p__Bacteroidota	c__Bacteroidia	o__Bacteroidales	f__UBA932	g__RC9	s__	1803.49	1243.52	1066.66	1343.79	2136.1	1172.34	1825.97	1885.58	1340.92	1527.46	1459.83	2096.24	1254.1	965.19	1420.07	605.82	615.31	988.87	561.54	444.21	675.17	850.68	742.32	1367.09
MAG166	752.85	79.2	274.34	355.6	43.21	149.69	0.001	0.00245132	d__Bacteria	p__Firmicutes_A	c__Clostridia	o__Oscillospirales	f__Oscillospiraceae	g__CAG-170	s__	1084.85	485.27	384.07	366.97	838	922.58	1198.85	910.61	907.73	811.99	542.91	580.35	479.68	276.33	430.88	124.59	310.67	399.53	344.45	91.88	259.29	561.63	462.21	526.06
MAG167	549.27	71.45	247.5	201.12	39.48	136.76	0.0008	0.00202795	d__Bacteria	p__Firmicutes	c__Bacilli	o__Erysipelotrichales	f__Erysipelotrichaceae	g__RUG521	s__	413.73	228.91	760.43	243.45	522.64	699.55	273.5	377.52	794.76	864.44	509.93	902.42	129.07	129.79	231.52	112.34	119.01	145.44	123.01	111.05	107.4	341.11	314.09	549.6
MAG168	2223.57	240.88	834.44	917.7	242.54	840.19	0.0018	0.00393711	d__Bacteria	p__Firmicutes_A	c__Clostridia	o__Oscillospirales	f__Oscillospiraceae	g__ER4	s__	2415.21	1294.73	2325.72	1037.94	2689.53	1760.53	3941.6	3232.61	2284.66	1473.75	1693.76	2532.75	514.72	829.23	2208.58	180.23	669.38	273.42	208.39	206.41	377.56	1412.25	1464.18	2668.07
MAG169	545.72	266.76	924.08	249.72	38.59	133.68	0.3865	0.45246	d__Bacteria	p__Firmicutes_A	c__Clostridia	o__Lachnospirales	f__Lachnospiraceae	g__Eubacterium_Q	s__	470.62	307.4	3445.88	411.1	319.75	457.5	111.81	135.35	174.15	438.98	184.28	91.87	264.06	135.79	459.19	88.35	232.48	431.69	172.07	167.13	443.75	114.84	168.52	318.82
MAG17	1970.54	748.63	2593.33	6067.95	1583.22	5484.42	0.0012	0.0028435	d__Bacteria	p__Firmicutes_A	c__Clostridia	o__Oscillospirales	f__Ruminococcaceae	g__Ruminococcus	s__	1484.32	1647.18	9832.61	1990.99	1542.18	1685.84	424.95	430.76	95.08	2688.25	398.14	1426.21	11750.7	21216.7	7202.58	2715.11	3784.43	3887.68	6373.8	3075.34	3173.91	1451.94	3938.1	4245.1
MAG170	1376.03	324.85	1125.33	130.45	55.47	192.14	0.0001	0.000557131	d__Bacteria	p__Firmicutes_A	c__Clostridia	o__Oscillospirales	f__Acutalibacteraceae	g__Ruminococcus_E	s__Ruminococcus_E sp900315785	1325.42	277.65	1863.83	685.68	671.88	1715.19	1100.82	425.78	461.81	4410.64	1918.51	1655.19	72.8	95.52	83.67	18.65	127.19	33.66	29.33	58.58	41.37	725.17	152.15	127.36
MAG171	692.57	272.83	945.1	468.1	296.05	1025.56	0.0056	0.0105333	d__Bacteria	p__Verrucomicrobiota	c__Kiritimatiellae	o__RFP12	f__	g__	s__	644.06	3595.97	952.5	240.99	480.25	386.26	247.22	237.92	494.46	117.94	676.83	236.43	110.07	89.64	35.69	9.52	126.84	177.55	28.58	13.29	20.04	1532.23	41.67	3432.02
MAG172	1076.65	140.24	485.81	760.13	148.36	513.93	0.0496	0.0760553	d__Bacteria	p__Firmicutes_A	c__Clostridia	o__Lachnospirales	f__Lachnospiraceae	g__Butyrivibrio	s__Butyrivibrio fibrisolvens_C	1218.13	840.34	2334.56	527.71	679.56	1289.54	624.55	1193.53	945.61	727.36	1237.78	1301.14	574.38	1060.17	534.18	274.36	655.22	828.92	679.82	335.5	277.78	2188.31	843.06	869.87
MAG173	661.63	283.88	983.41	1115.86	225.89	782.51	0.0567	0.0863191	d__Bacteria	p__Firmicutes	c__Bacilli	o__RFN20	f__CAG-826	g__UBA4951	s__UBA4951 sp900320745	12.42	11.2	19.87	10.99	22.01	23.16	1286.56	2176.79	25.48	1980.02	10.05	2360.99	271.66	946.95	912.42	1122.01	1213.01	137.14	742.68	2310.19	938.12	1998.58	2505.35	292.2
MAG174	302.16	82.11	284.42	615.58	181.56	628.94	0.1659	0.213244	d__Bacteria	p__Firmicutes_A	c__Clostridia	o__Lachnospirales	f__Lachnospiraceae	g__Eubacterium_Q	s__	158.9	248.65	1008.83	489.61	459.7	310.19	95.68	136.67	23.51	541.62	76.22	76.3	1092.18	2028.79	577.67	84.46	352.62	424.07	238.88	186.18	278.28	83.88	433.55	1606.37
MAG175	362.92	54.12	187.48	224.49	55.14	191	0.0647	0.0970075	d__Bacteria	p__Spirochaetota	c__Spirochaetia	o__Treponematales	f__Treponemataceae	g__Treponema_D	s__Treponema_D sp002369025	485.25	606.04	197.29	171.73	514.94	133.09	507	471.05	208.57	272.6	163.15	624.28	96.37	660.66	192.74	86.81	355.46	151.66	55.58	213.83	31.21	491.82	106.11	251.61
MAG176	272.42	76.4	264.65	787.58	150.99	523.05	0.0012	0.0028435	d__Bacteria	p__Firmicutes_A	c__Clostridia	o__Lachnospirales	f__Lachnospiraceae	g__FD2005	s__	155.35	139.76	1021.94	192.64	290.31	183.69	29.99	256.17	38.06	481.46	201.02	278.67	198.84	955.67	555.56	1081.11	545.44	497.92	623.21	373.53	556.92	2224.38	944.97	893.45
MAG177	26.36	3.49	12.09	944.9	937.04	3245.99	0.0007	0.00172365	d__Bacteria	p__Firmicutes_A	c__Clostridia	o__Oscillospirales	f__CAG-272	g__CAG-724	s__	24.42	48.92	49.94	12.07	24.93	27.15	15.52	15.63	26.92	19.53	30.74	20.56	10.94	9.56	7.54	3.94	4.83	10.57	5.23	3.39	4.75	11252.3	10.74	14.99
MAG178	153.55	23.85	82.63	568.09	92.76	321.34	0.0001	0.000617624	d__Bacteria	p__Firmicutes_C	c__Negativicutes	o__Selenomonadales	f__Selenomonadaceae	g__Mitsuokella	s__Mitsuokella multacida	317.23	59.27	171.89	308.75	117.82	128.1	121.18	169.92	62.64	114.6	161.44	109.74	702.19	369.07	470.21	356.82	341.49	374.83	1009.77	912.41	1191.7	123.85	584.27	380.49
MAG179	2171.64	428.62	1484.77	166.41	41.34	143.22	0.0003	0.000944584	d__Bacteria	p__Firmicutes_A	c__Clostridia	o__Lachnospirales	f__Lachnospiraceae	g__TWA4	s__	1796.09	1997.86	1245.79	30.47	755.66	2531.6	4190.25	3377.78	663.71	1597.06	4970.62	2902.82	194.7	311.1	432.39	16.74	171.29	19.81	60.31	21.29	45.08	370.53	189.07	164.55
MAG18	18927.9	1038.2	3596.43	8451.27	1704.42	5904.29	0.0005	0.00147325	d__Bacteria	p__Bacteroidota	c__Bacteroidia	o__Bacteroidales	f__Bacteroidaceae	g__Prevotella	s__Prevotella sp900316285	23493.2	14654.7	20264.5	19512.9	19998	26288	18121.1	17174.9	16575	20816.6	16510	13726.2	2862.67	11683	6286.18	5251.69	8939.45	22060.6	3977.34	2494.78	7075.46	12558.9	3355.98	14869.2
MAG180	1008.29	152.63	528.74	205.2	91.15	315.76	0.0003	0.00110952	d__Bacteria	p__Firmicutes_A	c__Clostridia	o__Oscillospirales	f__CAG-272	g__CAG-390	s__	1190.92	2233.17	773.79	716.29	846.38	1027.68	845.55	459.23	1259.55	288.03	1657.83	801.1	170.22	189.69	91.29	8.24	65.27	340.29	64.99	24.98	12.9	1136.56	24.46	333.52
MAG181	757.04	178.45	618.17	155.17	46.86	162.32	0.0007	0.00172365	d__Bacteria	p__Firmicutes_A	c__Clostridia	o__Lachnospirales	f__Lachnospiraceae	g__	s__	651.3	522.76	1882.2	604.32	368.94	1946.03	329.89	238.37	891.55	179.42	1224.55	245.14	242.53	213.42	62.53	62.58	124.99	16.65	119.5	23.08	39.55	348.32	51.83	557.01
MAG182	1376.22	257.02	890.34	175.83	35.64	123.45	<.0001	0.000417244	d__Bacteria	p__Bacteroidota	c__Bacteroidia	o__Bacteroidales	f__Bacteroidaceae	g__Phocaeicola	s__	972.67	3728.33	1002.33	1549.36	2046.92	707.12	768.89	529.41	1219.61	600.13	1838.66	1551.22	129.4	187.18	224.97	71.67	158.89	121.64	101.36	206.45	29.76	523.29	165.29	190.11
MAG183	236.62	36.15	125.24	280.19	36.02	124.76	0.6033	0.640391	d__Bacteria	p__Firmicutes_A	c__Clostridia	o__Lachnospirales	f__UBA1390	g__RUG760	s__	321.06	33.25	82.22	250.51	264.66	476.32	301.01	279.72	74.51	277.79	176.87	301.57	300.99	239.04	96.5	238.01	270.15	514.4	336.74	104.02	221.11	434.95	392.3	214.08
MAG184	639.02	82.38	285.36	73.31	24.23	83.93	<.0001	0.000417244	d__Bacteria	p__Desulfobacterota	c__Desulfovibrionia	o__Desulfovibrionales	f__Desulfovibrionaceae	g__Mailhella	s__	826.68	918.12	844.91	491.37	647.88	1269.22	394.77	249.67	629.34	399.68	578.78	417.78	42.26	56.53	63.82	10.45	78.09	95.25	12.33	9.24	6.09	276.92	29.15	199.6
MAG185	649.56	173.63	601.48	338.18	209.19	724.65	0.0209	0.0354432	d__Bacteria	p__Firmicutes_A	c__Clostridia	o__Oscillospirales	f__Acutalibacteraceae	g__UBA1213	s__UBA1213 sp900322105	386.89	528.96	195.05	1594.32	871.42	946.11	308.9	190.4	16.12	243.7	538.64	1974.18	302.14	86.4	67.43	0.98	135.78	346.61	25.41	30.47	8.47	460.67	6.67	2587.07
MAG186	1671.28	142.65	494.15	745.3	143.08	495.63	0.0004	0.0012857	d__Bacteria	p__Firmicutes_A	c__Clostridia	o__Oscillospirales	f__Oscillospiraceae	g__UBA1777	s__	1192.09	1921.49	2712.89	938.25	1374.6	1746.52	1700.08	1482.02	1673.74	2408.44	1485.22	1420.05	912.64	1180.67	1183.36	187	483.13	457.4	265.37	145.98	284.84	1536.99	968.08	1338.14
MAG187	3300.12	935.57	3240.9	145.87	61.59	213.36	<.0001	0.000417244	d__Archaea	p__Methanobacteriota	c__Methanobacteria	o__Methanobacteriales	f__Methanobacteriaceae	g__Methanobrevibacter_A	s__Methanobrevibacter_A sp900319535	3465.16	1853.19	1754.03	1237.25	1198.24	3038.31	1796.61	1655.43	12404.2	1162.28	3611.29	6425.36	73.93	50.41	36.74	13.8	282.45	128.66	22.03	34.98	10.45	766.51	109.37	221.12
MAG188	575.47	134.69	466.59	363.42	98.19	340.13	0.0941	0.13237	d__Bacteria	p__Bacteroidota	c__Bacteroidia	o__Bacteroidales	f__Bacteroidaceae	g__UBA1786	s__	625.12	1962.89	574.8	314.84	599.9	370.44	167.87	311.09	337.89	500.59	398.9	741.36	1032.08	964.84	241.77	82.12	275.75	416.16	69.88	70	46.53	330.59	215.48	615.79
MAG189	46.26	10.08	34.92	307.07	53.78	186.29	0.0005	0.00147325	d__Bacteria	p__Firmicutes_A	c__Clostridia	o__Lachnospirales	f__Lachnospiraceae	g__TF01-11	s__	15.34	29.37	122.37	47.5	62.62	51.94	29.99	104.58	12.52	33.6	23.05	22.22	178.05	395.53	321.23	147.92	65.98	421.48	224.28	420.29	379.79	21.8	427.7	680.75
MAG19	16012.3	1560.29	5405	13827.2	2909.3	10078.1	0.2987	0.361449	d__Bacteria	p__Bacteroidota	c__Bacteroidia	o__Bacteroidales	f__Bacteroidaceae	g__Prevotella	s__	19614.2	25652.1	6917.96	24234.4	15527.1	10074.2	17445.2	14658.5	16289	13577.8	16556.8	11600.6	12523.4	36075	22132.9	2754.39	15998.4	8781.84	4632.7	7207.31	3021.42	23102.4	9122.36	20575
MAG190	205.14	68.04	235.7	353.84	116.09	402.13	0.1489	0.193768	d__Bacteria	p__Firmicutes_A	c__Clostridia	o__Lachnospirales	f__Lachnospiraceae	g__Eubacterium_F	s__Eubacterium_F xylanophilum	102.19	211.59	885.41	248.5	333.26	251.42	35.37	61.04	31.72	142.5	47.8	110.83	473.13	283.98	321.86	89.88	252.88	431.58	76.56	83.55	322.64	24.41	343.02	1542.63
MAG191	1542.06	95.68	331.44	372.89	103.24	357.64	<.0001	0.000417244	d__Bacteria	p__Firmicutes	c__Bacilli	o__Acholeplasmatales	f__Anaeroplasmataceae	g__Anaeroplasma	s__	1365.06	1888.32	1167.61	1656.8	2421.78	1538.15	1358.45	1430.79	1319.42	1420.98	1402.45	1534.9	73.5	197.11	248.67	65.23	769.53	502.17	111.88	541.05	50.49	1153.69	70.71	690.7
MAG192	100.87	9.33	32.32	560.41	102.59	355.39	<.0001	0.000417244	d__Bacteria	p__Bacteroidota	c__Bacteroidia	o__Bacteroidales	f__Bacteroidaceae	g__RUG210	s__	114.16	156.5	173.22	95.22	82.77	80.08	78.95	72.38	102.19	76.04	92.81	86.13	267.91	889.43	545.65	1012.46	169.19	829.63	1199.6	669.65	218.88	417.84	157.09	347.64
MAG193	958.49	190.97	661.54	731.93	307.48	1065.14	0.0941	0.13237	d__Bacteria	p__Firmicutes_A	c__Clostridia_A	o__Christensenellales	f__CAG-138	g__UBA3792	s__	329.5	2599.83	1483.93	215.76	860.16	474.43	700.7	927.85	1335.81	574.12	1381.8	617.96	1470	83.79	139.1	15.95	95.51	175.01	1139.93	15.75	26.42	3506.12	405.83	1709.77
MAG194	314.52	64.84	224.61	357.02	70.34	243.67	0.5254	0.577509	d__Bacteria	p__Firmicutes_A	c__Clostridia	o__Lachnospirales	f__Lachnospiraceae	g__Eubacterium_Q	s__	527.17	220.74	530.86	279.14	267.39	856.76	140.63	188.42	56.69	362.39	195.51	148.54	227.87	365.23	287.42	276.91	440.77	554.37	211.49	66.53	217.36	138.51	526.15	971.63
MAG195	802.14	128.48	445.08	383.46	142.01	491.92	0.0243	0.0406036	d__Bacteria	p__Bacteroidota	c__Bacteroidia	o__Bacteroidales	f__UBA932	g__RC9	s__RC9 sp900167925	581.51	1319.89	612.18	795.6	894.92	1877.94	304.15	753.14	1009.83	270.74	652.53	553.2	52.59	834.56	159.45	5.78	489.39	25.01	84.23	30.81	7.72	1036.2	380.92	1494.87
MAG196	995.28	347.76	1204.68	256.65	61.03	211.41	0.0032	0.00644001	d__Bacteria	p__Firmicutes_A	c__Clostridia	o__Lachnospirales	f__Lachnospiraceae	g__CAG-127	s__	860.24	512.1	4556.62	441.81	544.38	1821.21	355.1	441.17	141.08	1014.46	872.25	382.91	709.45	280.7	373.48	33.36	248.86	185.19	54.75	35.94	44.64	366.34	225.88	521.16
MAG197	337.38	42.43	146.96	251.33	57.47	199.09	0.1489	0.193768	d__Bacteria	p__Firmicutes	c__Bacilli	o__RFN20	f__CAG-449	g__UBA3210	s__	285.53	462.36	147.62	221.68	355.55	199.39	581.33	614.14	330.5	227.13	290.73	332.59	39.75	451.15	235.18	64.27	185.65	585.55	170.58	121.15	25.99	601.58	231.62	303.54
MAG198	499.75	43.12	149.38	248.29	63.63	220.43	0.0008	0.00202795	d__Bacteria	p__Firmicutes_A	c__Clostridia	o__Lachnospirales	f__Lachnospiraceae	g__	s__	427.78	301.03	587.06	344.35	397.81	626.55	836.1	399.95	627.08	444.34	511.57	493.33	150.8	340.46	264.83	47.94	281.09	282.93	59.78	57.55	104.63	340.86	192.38	856.19
MAG199	1162.49	186.96	647.65	130.9	54.04	187.19	<.0001	0.000480481	d__Bacteria	p__Firmicutes_A	c__Clostridia	o__Lachnospirales	f__Lachnospiraceae	g__ISDg	s__	1953.81	2371.9	1412.51	1302.08	947.98	1842	846.21	633.42	427.68	425.21	1297.99	489.04	23	357.4	155.56	2.41	88.36	12.25	13.22	5.56	12.14	592.78	28.78	279.38
MAG2	1605.5	170	588.88	2588.69	579.25	2006.59	0.3865	0.45246	d__Bacteria	p__Firmicutes_A	c__Clostridia	o__Lachnospirales	f__Lachnospiraceae	g__Eubacterium_S	s__	2539.96	2153.52	2411.19	1684.71	1950.51	1087.59	1266.82	1545.36	751.18	788.42	1736.78	1349.9	7123.42	4372.7	976.46	2071.66	2355.9	2084	2973.48	1243.92	991.25	441.48	1283	5146.97
MAG20	419.73	191.1	661.99	892.83	479.98	1662.7	0.6442	0.675437	d__Bacteria	p__Cyanobacteria	c__Vampirovibrionia	o__Gastranaerophilales	f__Gastranaerophilaceae	g__UBA1221	s__	120.32	2224.25	1298.89	156.47	265.85	64.23	182.52	102.85	24.48	322.45	125.63	148.8	723.99	5735.82	698.05	113.47	209.19	205.93	102.57	237.96	36.43	112.68	114.75	2423.11
MAG200	1301.2	622.09	2155	415.17	85.05	294.63	0.0209	0.0354432	d__Bacteria	p__Verrucomicrobiota	c__Kiritimatiellae	o__RFP12	f__UBA1067	g__UBA1067	s__UBA1067 sp002395905	893.67	8060.56	968.81	770.64	1537.46	692.67	393.03	370.24	453.48	349.43	599.36	525.07	256.6	771.74	371.63	82.2	1014.3	755.77	111.26	277.06	173.87	553.9	271.67	342
MAG201	687.45	268.34	929.57	278.96	54.5	188.79	0.1489	0.193768	d__Bacteria	p__Firmicutes_A	c__Clostridia	o__Oscillospirales	f__Acutalibacteraceae	g__UBA737	s__	331.6	954.78	3462.77	8.57	151.95	108.91	138.89	550.77	311.21	703.36	606.21	920.36	473.83	80.59	101.95	124.81	153.09	31.98	522.92	521.54	221.21	371.78	504.59	239.19
MAG202	278.22	108.2	374.83	500.76	144.31	499.89	0.0153	0.0263569	d__Bacteria	p__Actinobacteriota	c__Coriobacteriia	o__Coriobacteriales	f__Atopobiaceae	g__Olsenella	s__Olsenella umbonata	222.7	182.6	74.05	62.57	75.96	105.51	1406.23	256.85	265.58	479.16	102.37	105.03	255.27	511.55	360.43	344.12	692.75	488.88	567.1	113	203.86	1991.85	189.65	290.71
MAG203	2164.12	208.44	722.04	461.51	112.09	388.28	<.0001	0.000480481	d__Bacteria	p__Firmicutes_A	c__Clostridia	o__Oscillospirales	f__Oscillospiraceae	g__UBA738	s__	3291.74	1849.69	2261.4	1163.36	1672.29	3186.11	2111.37	1499.56	3041.9	1291.56	2464.14	2136.35	419.6	407.31	376.57	175.48	435.45	451.51	240.29	109.58	185.47	1569.3	413.84	753.7
MAG204	299.25	44.22	153.19	625.06	149.92	519.34	0.1489	0.193768	d__Bacteria	p__Firmicutes_A	c__Clostridia	o__Oscillospirales	f__Acutalibacteraceae	g__DTU089_A	s__	206.86	351.85	705.99	228.13	187.68	295.4	158.13	322.49	151.95	410.42	353.24	218.86	1562.63	288.68	665.83	8.42	130.01	161.86	818.28	744.51	1556.13	335.43	358.99	869.94
MAG205	713.66	166.11	575.43	146.58	28.29	98	0.0004	0.0012857	d__Bacteria	p__Firmicutes	c__Bacilli	o__RF39	f__CAG-611	g__UBA3789	s__	447.34	907.18	1576.88	281.25	310.27	1652.34	1351.73	245.07	167.17	1143.68	238.75	242.28	175.69	392.06	79.15	14.16	174.51	106.83	24.87	103.72	192.86	167.59	152.01	175.45
MAG206	968.24	165.49	573.26	334.08	100.91	349.56	0.0018	0.00393711	d__Bacteria	p__Bacteroidota	c__Bacteroidia	o__Bacteroidales	f__Muribaculaceae	g__C941	s__	1663.39	844.49	1017.24	807.31	967.24	2427.26	822.01	1094.5	558.94	377.36	482.82	556.3	101.71	444.65	405.64	78.73	484.39	71.7	199.63	77.48	119	586.01	161.19	1278.84
MAG207	583.07	86.71	300.38	334.05	103.79	359.54	0.0377	0.0596048	d__Bacteria	p__Firmicutes_A	c__Clostridia	o__Oscillospirales	f__Acutalibacteraceae	g__Ruminococcus_E	s__	581.34	215.57	268	612.2	419.99	969.17	1228.79	649.12	560.53	310.1	797.47	384.6	279.04	357.83	201.45	4.83	214.99	975.34	57.73	40.82	8.19	974.27	161.49	732.57
MAG208	92.54	5.86	20.3	750.68	247.26	856.52	0.0012	0.0028435	d__Bacteria	p__Spirochaetota	c__Spirochaetia	o__Sphaerochaetales	f__Sphaerochaetaceae	g__RUG023	s__RUG023 sp900315435	88.84	138.25	118.13	83.78	85.38	111.4	84.07	70.46	85.97	69.21	94.4	80.64	269.62	824.47	494.92	814.92	84.84	832.88	891.14	3282.71	830.76	83.11	191.94	406.81
MAG209	269.17	151.68	525.43	218.23	147.34	510.39	0.0833	0.119107	d__Bacteria	p__Firmicutes_A	c__Clostridia	o__Lachnospirales	f__Lachnospiraceae	g__CAG-411	s__	120.22	1927.43	146.96	120.68	239.09	180.05	73.7	142.15	55.56	52.85	135.26	36.04	245.73	62.99	65.22	61.81	80.34	1827.8	55.48	25.12	20.08	22.96	99.65	51.6
MAG21	475.6	34.01	117.81	2371.87	936.2	3243.11	0.1659	0.213244	d__Bacteria	p__Bacteroidota	c__Bacteroidia	o__Bacteroidales	f__Bacteroidaceae	g__Prevotella	s__	557.8	640.98	288.47	716.59	487.52	354.37	477.58	438.06	482.28	415.43	413.44	434.63	470.83	7029.58	657.8	1610.09	461.27	270.85	664.58	7989.35	8091.59	492.42	304.95	419.12
MAG210	2351.04	237.14	821.49	538.89	170.86	591.89	0.0001	0.000557131	d__Bacteria	p__Bacteroidota	c__Bacteroidia	o__Bacteroidales	f__Bacteroidaceae	g__UBA4372	s__	2914.2	3469.36	1740.52	2345.27	2705.64	4074.23	1462.03	1290	2202.25	1959.15	2228.69	1821.09	266.08	629.96	684.92	53.62	966.76	113.94	74.67	82.37	46.49	1885.68	331.36	1330.83
MAG211	467.48	61.3	212.35	682.71	152.82	529.38	0.4529	0.510866	d__Bacteria	p__Firmicutes_A	c__Clostridia	o__Lachnospirales	f__Lachnospiraceae	g__Eubacterium_Q	s__	468.56	217.27	804.64	539.03	284.28	843.14	431.2	523.76	136.82	584.02	383.66	393.4	295.42	1929.77	511.32	651.29	642.7	398.9	278.25	132.43	222.48	798.68	1396.85	934.48
MAG212	3841.68	871.32	3018.35	42.03	9.02	31.25	<.0001	0.000417244	d__Bacteria	p__Firmicutes_A	c__Clostridia	o__Lachnospirales	f__Lachnospiraceae	g__	s__	2562.28	670.37	1041.41	4804.24	1236.8	4675.03	3702.34	2279.05	11710.2	5708.39	2369.7	5340.32	31.01	45.43	40.46	18.2	34.95	32.54	20.25	18.29	27.7	133.03	41.13	61.31
MAG213	1010.22	139.14	482	317.67	58.45	202.49	0.0001	0.000557131	d__Bacteria	p__Firmicutes_A	c__Clostridia	o__Oscillospirales	f__Oscillospiraceae	g__UBA1774	s__	1240.72	2354.52	734.61	859.31	1158.18	870.27	1055.05	572.98	457.35	801.78	929.18	1088.7	590.34	507.87	247.3	56.19	310.33	401.07	163.95	56.38	77.82	632.59	420.95	347.22
MAG214	480.38	165.72	574.06	188.54	50.9	176.34	0.0567	0.0863191	d__Bacteria	p__Firmicutes_A	c__Clostridia	o__Oscillospirales	f__Ruminococcaceae	g__Firm-04	s__Firm-04 sp001603005	404.87	422.4	1001.11	357.72	379.3	2137.58	240.75	169.68	85.08	206.46	239.82	119.74	286.09	89.74	87.92	34.52	126.29	526.24	47.28	18.28	76.71	140.06	365.07	464.31
MAG215	2009.74	382.48	1324.93	77.67	28.5	98.73	<.0001	0.000417244	d__Bacteria	p__Firmicutes_A	c__Clostridia	o__Oscillospirales	f__Acutalibacteraceae	g__RUG762	s__	1461.37	3841.1	3544.7	2506.96	1080.98	3195.84	214.86	1120.48	1261.34	1156.87	749.3	3983.07	143.2	28.77	57.98	7.27	201.28	28.77	9.22	7.77	10.62	320.07	13.97	103.09
MAG216	334.77	85.47	296.09	189.51	69.06	239.22	0.1842	0.234054	d__Bacteria	p__Firmicutes_A	c__Clostridia	o__Oscillospirales	f__Acutalibacteraceae	g__UMGS1858	s__	324.3	101.72	103.18	35.91	57.27	833.94	706.35	115.7	636.26	291.82	681.07	129.7	57.66	241.37	707.94	27.63	57.34	658.59	49.27	59.7	141.53	151.02	18.68	103.34
MAG217	186.71	27.28	94.51	272.61	51.2	177.36	0.1842	0.234054	d__Bacteria	p__Firmicutes_A	c__Clostridia	o__Lachnospirales	f__Lachnospiraceae	g__UBA629	s__	109.86	116.83	386.47	71.81	120.01	294.48	249.88	231.24	222.49	140.27	203.28	93.88	119.77	636.35	179.06	297.16	223.76	203.62	158.84	142.67	121.51	530.26	484.77	173.57
MAG218	334.35	91.53	317.06	490.83	162.11	561.55	0.5637	0.607281	d__Bacteria	p__Firmicutes_A	c__Clostridia	o__Lachnospirales	f__Lachnospiraceae	g__Lachnobacterium	s__Lachnobacterium bovis	331.76	125.78	1267.24	198.82	238.43	284.59	232.47	230.88	178.72	225.05	120.9	577.6	270.21	1044.32	454.29	331.4	62.69	234.32	273.79	139.99	46.02	2007.2	221.77	803.94
MAG219	609.99	79.31	274.74	221.13	39.17	135.68	0.0003	0.00110952	d__Bacteria	p__Firmicutes_A	c__Clostridia	o__Lachnospirales	f__Lachnospiraceae	g__UBA1201_A	s__	595.39	971.49	455.78	781.01	450.75	660.81	340.74	438.45	1204.82	518.31	679	223.29	374.24	341.61	417.43	28.5	79.62	238.1	88.12	81.61	151.26	297.24	193.27	362.53
MAG22	3135.12	575.15	1992.39	2908.06	784.39	2717.19	0.6033	0.640391	d__Bacteria	p__Bacteroidota	c__Bacteroidia	o__Bacteroidales	f__Bacteroidaceae	g__Ga6A1	s__Ga6A1 sp900102385	2069.79	2686.2	2247.6	4167.91	2880.35	833.07	6585.04	6710.21	944.79	3841.96	944.33	3710.17	350.59	7154.81	6601.89	962.82	3418.57	1756	1009.61	1295.54	417.06	2795.05	7705.37	1429.39
MAG220	883.53	76.59	265.32	34567.5	10625.8	36808.7	0.0003	0.000944584	d__Bacteria	p__Bacteroidota	c__Bacteroidia	o__Bacteroidales	f__Bacteroidaceae	g__Prevotella	s__Prevotella sp900319905	1023.12	1476.86	616.26	1322.89	934.3	767.14	750.76	728.76	791.95	699.34	755.8	735.21	19106.9	18141.7	17875.3	100708	1207.26	32349.6	98407.9	49099.4	70042	882.44	6036.2	953.35
MAG221	468.37	73.62	255.03	363.12	80.64	279.36	0.2482	0.308127	d__Bacteria	p__Firmicutes_A	c__Clostridia	o__Lachnospirales	f__Lachnospiraceae	g__UBA3766	s__	472.21	724.3	1006.21	245.55	650.97	505.39	488.7	375.86	160.87	592.29	120.51	277.55	284.97	580.91	444.98	7.33	233.6	205.03	202.65	201.94	70.15	417.78	914.53	793.53
MAG222	93.28	26.14	90.56	465.73	150.29	520.61	0.0079	0.0145442	d__Bacteria	p__Proteobacteria	c__Gammaproteobacteria	o__Enterobacterales	f__Succinivibrionaceae	g__Succinivibrio	s__Succinivibrio sp000431835	43.52	66.78	75.93	80.65	108.18	11.38	13.66	129.62	33.6	237.61	19.73	298.65	391.21	107.15	974.47	298.23	291.19	648.76	26.42	473.54	124.2	39.98	1876.05	337.56
MAG223	405.44	53.18	184.21	1566.23	327.62	1134.89	0.0002	0.000712745	d__Bacteria	p__Spirochaetota	c__Spirochaetia	o__Treponematales	f__Treponemataceae	g__Treponema_D	s__Treponema_D sp002350445	251.44	465.47	323.7	226.38	712.66	382.23	515.32	623.7	105.34	398.42	255.39	605.28	1431.13	2512.55	1242.84	776.91	1720.33	4456.99	843.61	2576.06	330.39	963.44	1010.02	930.46
MAG224	148.44	31.68	109.75	297.23	60.61	209.96	0.0433	0.067299	d__Bacteria	p__Firmicutes_A	c__Clostridia	o__Oscillospirales	f__Acutalibacteraceae	g__CAG-180	s__	106.07	131.82	372.12	42.79	128.48	176.53	38.82	343.58	22.47	147.96	164.87	105.82	694.85	196.98	109.28	145.09	119.28	481.53	214.21	108.44	598.41	288.2	133.18	477.35
MAG225	1419.06	165.83	574.45	449.99	121.05	419.32	0.0008	0.00202795	d__Bacteria	p__Bacteroidota	c__Bacteroidia	o__Bacteroidales	f__Bacteroidaceae	g__Prevotella	s__Prevotella sp900315075	1733.47	1484.18	484.13	980.79	949.75	2558.02	1248.26	1272.43	1197.74	2224.69	1758.15	1137.12	674.02	416.74	560.95	72.65	501.16	197.22	82.94	114.37	64.7	1288.41	252.92	1173.85
MAG226	379.18	54.18	187.69	576.51	385.63	1335.87	0.0433	0.067299	d__Bacteria	p__Firmicutes_A	c__Clostridia	o__Oscillospirales	f__Acutalibacteraceae	g__UBA1213	s__UBA1213 sp002351795	373.19	448.94	804.62	280.78	334.64	385.99	353.96	226.85	87.96	568.21	488.83	196.2	829.6	186.52	171.75	46.92	108.68	4756.26	60.94	26.56	39.79	158.22	97.71	435.18
MAG227	2032.59	717.24	2484.58	309.15	73.83	255.75	0.0001	0.000557131	d__Bacteria	p__Verrucomicrobiota	c__Kiritimatiellae	o__RFP12	f__UBA1067	g__UBA1067	s__	1922.75	9683.05	1611.72	1677.11	2482.08	1581.45	862.1	705.9	747.11	444.02	901.25	1772.49	375.84	351.51	239.1	49.99	570.14	851.53	120.7	94.63	60.94	627.1	142.87	225.48
MAG228	387.55	54.45	188.63	408.41	125.66	435.31	0.2727	0.3375	d__Bacteria	p__Firmicutes_A	c__Clostridia	o__Lachnospirales	f__Lachnospiraceae	g__RUG306	s__RUG306 sp900313435	279.81	415.44	517.76	69.82	311.89	352.35	140.94	375.03	364.01	454.16	760.69	608.74	476.37	313.86	274.25	34.98	182.54	178.21	290.31	89.44	181.53	1521.56	320.59	1037.22
MAG229	727.5	167.93	581.72	316.5	59.75	206.99	0.0647	0.0970075	d__Bacteria	p__Firmicutes_A	c__Clostridia	o__Oscillospirales	f__Acutalibacteraceae	g__CAG-177	s__	724.2	127.2	209.25	902.35	476.6	1505.53	1275.32	1870.63	61.31	486.76	214	876.88	572.59	636.11	362.94	107.17	373.65	116.14	229.46	81.18	176.73	582.01	108.92	451.07
MAG23	10642.6	1728.54	5987.82	6079.91	811.61	2811.5	0.0433	0.067299	d__Bacteria	p__Bacteroidota	c__Bacteroidia	o__Bacteroidales	f__Bacteroidaceae	g__UBA4293	s__UBA4293 sp002395835	16360.6	3354.24	2827.02	6607.37	12432.9	5027.38	10280	9351.28	9537.7	17038.7	11972.1	22921.8	2557.4	7410.77	12757.2	6560.48	7619.4	5797.55	6169.19	5623.59	3287.66	2955.23	8075.68	4144.8
MAG230	3399.62	426.36	1476.94	859.06	194.19	672.69	<.0001	0.00051826	d__Bacteria	p__Firmicutes_A	c__Clostridia	o__Oscillospirales	f__Oscillospiraceae	g__CAG-83	s__	2985.68	3346.55	6948.92	1694.47	3076.83	3885.41	2274.99	2663.94	5447.77	2171.73	3562.93	2736.26	1017.36	713.4	1120.02	216.69	607.85	421.81	364.25	245.55	425.9	2288.3	868.99	2018.65
MAG231	53.15	14.46	50.07	422.97	390.84	1353.9	0.954	0.958397	d__Bacteria	p__Firmicutes_A	c__Clostridia	o__Lachnospirales	f__Lachnospiraceae	g__	s__	22.68	149.18	67.3	31.75	30.72	163.69	17.13	42.12	23.78	38.83	22.6	28.02	52.34	28.47	33.96	30.49	20.13	4722.07	24.84	16.84	23.7	43.85	39.53	39.43
MAG232	947.24	218.01	755.21	216.15	64.95	224.98	0.0004	0.0012857	d__Bacteria	p__Firmicutes_A	c__Clostridia	o__Oscillospirales	f__CAG-382	g__UBA1752	s__	876.07	3191.89	1223.84	592.72	781.24	1031.75	475.35	414.32	967.01	555.63	883.28	373.74	687.03	267.06	117.03	8.85	109.17	179.86	93.81	10.07	19.84	477.54	106.47	517.07
MAG233	276.81	56.41	195.41	398.4	72.76	252.06	0.1842	0.234054	d__Bacteria	p__Firmicutes_A	c__Clostridia	o__Lachnospirales	f__Lachnospiraceae	g__CAG-127	s__CAG-127 sp900321145	264.57	76.62	337.58	196.83	53.88	411.86	590.3	377.44	55.55	616.46	226.8	113.84	712.76	309.19	494.83	395.59	172.19	488	141.71	62.78	203.02	433.74	415.99	950.99
MAG234	780.05	335.06	1160.69	91.62	39.66	137.4	0.0003	0.00110952	d__Bacteria	p__Proteobacteria	c__Alphaproteobacteria	o__RF32	f__CAG-239	g__51-20	s__	364.81	1304.91	110.22	348.86	756.83	312.56	566.63	345.13	130.79	209.29	594.74	4315.78	97.03	58.86	58.83	7.39	87.47	44.35	11.46	8.77	4.94	228.26	12.59	479.45
MAG235	525.82	95.55	330.98	371.09	125.03	433.13	0.106	0.146257	d__Bacteria	p__Firmicutes_A	c__Clostridia	o__Oscillospirales	f__Ruminococcaceae	g__Ruminococcus_D	s__	305.78	856.99	1133.81	561.66	428.28	715.91	703.53	213.49	89.19	865.18	272.3	163.68	1545.16	226.41	190.33	88.5	125.26	792.91	65.88	59.2	444.27	178.59	167.66	568.86
MAG236	1765.49	287.15	994.7	403.31	76.66	265.55	<.0001	0.000480481	d__Bacteria	p__Firmicutes_A	c__Clostridia_A	o__Christensenellales	f__CAG-74	g__UBA2943	s__UBA2943 sp002350845	1532.48	1140.8	2774.35	1089.5	785.13	2069.1	927.27	1103.75	3323.93	959.13	1793.8	3686.66	255.86	231.76	298.37	134.29	906.5	275.12	210.84	350.81	245.58	798.17	344.97	787.4
MAG237	518.57	56.52	195.79	536.42	139.6	483.6	0.119	0.162729	d__Bacteria	p__Patescibacteria	c__Saccharimonadia	o__Saccharimonadales	f__Saccharimonadaceae	g__UBA2866	s__	514.61	739.94	568.69	520.82	770.24	620.6	563.89	504.6	123.11	493.08	167.38	635.9	533.73	1331.99	464.23	69.14	366.26	322.58	228.32	502.61	122.18	316.23	492.99	1686.8
MAG238	1670.51	293.57	1016.97	2039.9	519.16	1798.41	0.8625	0.880841	d__Bacteria	p__Firmicutes_A	c__Clostridia	o__TANB77	f__CAG-508	g__	s__	1796.44	788.07	1246.07	1767.54	1359.97	1619.63	696.45	1330.52	1113.44	1700.5	1987.65	4639.87	1679.2	1848.3	721.19	683.33	2009.52	3264.65	642.19	1829.76	179.04	6391.61	991.68	4238.36
MAG239	465.89	61.18	211.93	273.6	87.7	303.8	0.0243	0.0406036	d__Bacteria	p__Firmicutes	c__Bacilli	o__RFN20	f__CAG-826	g__UBA733	s__	301.24	460.83	162.21	417.61	686.85	319.9	644.32	923.96	580.56	422.91	259.68	410.66	29.75	290.6	313.76	12.41	371.52	305.01	77.92	200.61	27.3	1101.14	69.32	483.87
MAG24	1014	133.65	462.99	3503.69	940.47	3257.89	0.0003	0.000944584	d__Bacteria	p__Bacteroidota	c__Bacteroidia	o__Bacteroidales	f__P3	g__UBA1217	s__	670.21	1169.51	588.47	720.54	768.63	605.45	1160.9	1454.68	786.41	2161.43	780.5	1301.29	6008.19	12626.5	2585.24	1183.71	1394.17	1464.88	2492.43	5378.33	2015.61	2900.57	2616.65	1377.97
MAG240	1438.02	581.38	2013.96	134.98	78.74	272.78	0.0003	0.000944584	d__Archaea	p__Methanobacteriota	c__Methanobacteria	o__Methanobacteriales	f__Methanobacteriaceae	g__Methanobrevibacter_A	s__Methanobrevibacter_A sp900313645	393.69	553.09	826.73	126.09	617.69	462.42	381.41	516.74	6877.96	504.87	3927.46	2068.1	88.54	53.97	26.72	26.36	46.49	79.03	39.28	41.54	21.98	996.44	101.91	97.5
MAG241	353.16	106.07	367.43	350.55	152.79	529.29	0.106	0.146257	d__Bacteria	p__Firmicutes_A	c__Clostridia	o__Oscillospirales	f__Acutalibacteraceae	g__Eubacterium_R	s__	323.78	178.25	237.88	131.88	189.09	327.88	138.99	687.16	17.19	311.67	1396.55	297.61	131.45	174.08	108.22	73.3	84.86	108.9	90.86	63.94	34.41	1767.45	556.47	1012.6
MAG242	476.89	113.74	394	288.94	50.2	173.9	0.4529	0.510866	d__Bacteria	p__Proteobacteria	c__Gammaproteobacteria	o__Burkholderiales	f__Burkholderiaceae	g__Achromobacter	s__Achromobacter dolens	367.14	810.81	492.71	1201.57	1023.57	832.95	337.17	175.7	77.58	222.39	93.05	88.03	205.18	342.4	204	223.37	525.91	168.59	159.15	208.23	124.56	622.24	533.58	150.04
MAG243	902.77	73.17	253.47	481.74	73.14	253.37	0.0027	0.00546148	d__Bacteria	p__Firmicutes_A	c__Clostridia	o__Oscillospirales	f__Butyricicoccaceae	g__UMGS1384	s__	945.65	1062.51	724.76	924.54	933.46	736.92	1243.47	1034.06	257.15	1130.6	1009.82	830.29	1001.75	467.68	423.24	169.71	316.45	244.89	428.66	294.15	282.97	741.48	763.08	646.77
MAG244	162.11	28.69	99.39	709.59	275.66	954.92	0.0153	0.0263569	d__Bacteria	p__Firmicutes_A	c__Clostridia	o__Lachnospirales	f__Lachnospiraceae	g__Eubacterium_Q	s__	178.05	327.72	235.69	291.07	99.78	228.92	49.22	119.56	52.52	78.34	232.32	52.18	753.75	552.67	424.91	8.98	87.39	3548.73	347.04	454.45	869.47	92.96	251	1123.78
MAG245	441.29	144.08	499.11	647.12	182.31	631.54	0.204	0.256216	d__Bacteria	p__Firmicutes_A	c__Clostridia	o__Saccharofermentanales	f__Saccharofermentanaceae	g__Saccharofermentans	s__	236.57	918.19	1483.78	126.79	1247.36	191.18	96.61	143.53	59.9	547.02	71.43	173.09	965.14	2217.6	402.76	144.5	648.62	814.88	200.53	169.05	246.37	72.63	501.69	1381.61
MAG246	582.17	167.88	581.54	354.34	147.25	510.08	0.1489	0.193768	d__Bacteria	p__Firmicutes	c__Bacilli	o__RFN20	f__CAG-288	g__UBA7642	s__	201.42	60.33	112.45	622.16	559.52	165.78	684.25	1752.69	62.98	979.34	219.45	1565.67	24.43	481.7	366.65	26.88	620.42	27.63	49.53	201.37	8.47	1836.6	220.53	387.84
MAG247	841.55	153.6	532.09	152.82	38.73	134.18	0.0001	0.000557131	d__Bacteria	p__Spirochaetota	c__Spirochaetia	o__Treponematales	f__Treponemataceae	g__Treponema_D	s__	467.75	768.58	809.2	1090.76	1563.15	920	884.43	595.15	276.2	388.34	278.88	2056.1	157.92	221.5	202.7	9.09	330.01	423.42	32.62	39.63	14.56	234.25	44.86	123.27
MAG248	1279.76	155.08	537.23	354.15	107.13	371.12	0.0004	0.0012857	d__Bacteria	p__Bacteroidota	c__Bacteroidia	o__Bacteroidales	f__Bacteroidaceae	g__Prevotella	s__	1063.88	556.89	1961.35	725.64	1149.81	2413.21	1200.74	1748.3	950.69	1203.93	1488.81	893.89	115.79	348.6	573.88	70.34	299.75	275.93	93.61	76.61	73.96	1246.09	195.59	879.68
MAG249	334.88	101.19	350.52	463.92	135.26	468.56	0.9081	0.923029	d__Bacteria	p__Bacteroidota	c__Bacteroidia	o__Bacteroidales	f__UBA932	g__RC9	s__	139.79	1303.41	186.46	337.44	211.94	234.91	98.55	296.29	159.94	91.66	214.93	743.22	91.54	423.97	958.22	29.43	338.46	1191.78	112.25	179.8	33.34	1098.45	61.36	1048.43
MAG25	15780.1	2268.14	7857.07	9088.72	2888.26	10005.2	0.0377	0.0596048	d__Bacteria	p__Firmicutes_A	c__Clostridia	o__Oscillospirales	f__Oscillospiraceae	g__UBA1777	s__	9513.73	14964.7	19928.5	7731.45	17905.5	14364.6	10211	12154.4	18021.8	8241.65	36468.4	19855.2	2364.6	18316.5	33590.4	1483.23	14035.4	3554.38	1458.09	1127.35	943.53	15789.7	4803.92	11597.6
MAG250	810.5	107.33	371.79	145.06	54.66	189.33	<.0001	0.00051826	d__Bacteria	p__Firmicutes_A	c__Clostridia	o__Oscillospirales	f__CAG-382	g__UBA1206	s__	1007.98	449.85	1179.48	854.37	705.36	773.46	366.06	970.74	729.19	377.7	633.78	1678.02	124.2	167.15	44.62	45.42	60.92	110.72	114.9	23.04	16.69	671.34	17.63	344.13
MAG251	397.71	69.43	240.52	383.32	136.06	471.33	0.2482	0.308127	d__Bacteria	p__Firmicutes_A	c__Clostridia	o__Lachnospirales	f__Lachnospiraceae	g__Eubacterium_Q	s__	312.23	550.36	886.38	540.73	295.98	615.7	144.5	307.71	67.21	298.31	596.28	157.15	479.61	252.06	409.62	55.07	40.25	1505.48	127.65	145.17	316.47	20.63	95.76	1152.06
MAG252	308.23	71.13	246.41	1567.92	292.15	1012.02	0.0005	0.00147325	d__Bacteria	p__Firmicutes_A	c__Clostridia	o__Lachnospirales	f__Lachnospiraceae	g__CAG-590	s__	164.24	242.31	1051.38	240.93	407	272.48	188.96	247.13	101.26	329.31	242.68	211.03	2857.97	1398.9	1162.9	1607.36	513.42	2175.77	2258.73	565.71	1235.76	185.3	3640.67	1212.54
MAG253	450.07	249.6	864.63	412.13	132.89	460.36	0.6033	0.640391	d__Bacteria	p__Firmicutes_A	c__Clostridia	o__Lachnospirales	f__Lachnospiraceae	g__Eubacterium_S	s__	143.31	3101.99	183.5	225.82	907.98	145.97	97.77	112.16	100.61	131.73	119.18	130.83	990.86	1405.45	207.84	172.47	128.4	409.08	202.78	126.89	58.72	121.06	86.23	1035.78
MAG254	1582.84	216.8	751.03	544.39	131.08	454.07	0.0007	0.00172365	d__Bacteria	p__Firmicutes_A	c__Clostridia	o__Lachnospirales	f__Lachnospiraceae	g__Clostridium_R	s__Clostridium_R sp003445895	1325.69	881.22	2159.6	1182.92	1637.29	3581.02	881.49	997.11	1309.12	1810.38	1302.57	1925.68	202.75	284.98	394.93	216.82	1023.25	511.41	153.84	196.11	422.91	895.91	540.08	1689.73
MAG255	796.19	143.23	496.16	780.79	76.06	263.47	0.6861	0.714212	d__Bacteria	p__Bacteroidota	c__Bacteroidia	o__Bacteroidales	f__UBA932	g__RC9	s__	627.99	698.3	285.7	295.75	1281.38	277.98	622.79	874.43	867.97	1133.85	585.54	2002.55	732.87	633.4	1123.96	440.09	814.73	1026.65	762.81	471.72	1105.61	770.34	397.34	1089.97
MAG256	227.78	23.34	80.84	384.55	67.11	232.46	0.0941	0.13237	d__Bacteria	p__Firmicutes_A	c__Clostridia	o__Peptostreptococcales	f__Anaerovoracaceae	g__UBA1764	s__	151.43	223.57	293.18	105.16	135.27	285.86	262.84	323.14	182.79	239.03	166.9	364.2	520.62	483.26	220.7	155.59	138.4	541.24	400.09	133.5	474.77	362.49	242.85	941.13
MAG257	1381.55	401.4	1390.49	1018.15	191.5	663.39	0.8625	0.880841	d__Bacteria	p__Firmicutes_A	c__Clostridia	o__Lachnospirales	f__Lachnospiraceae	g__Butyrivibrio	s__Butyrivibrio hungatei_B	998.68	1843	4532.29	369.4	1256.22	3862.06	367.98	476.02	974.51	789.21	386.06	723.2	1592.24	2617.06	888.49	483.63	586.87	1768.59	667.47	548.94	326.96	739.77	953.7	1044.05
MAG258	1517.83	367.2	1272.01	704.5	137.52	476.4	0.0022	0.00459767	d__Bacteria	p__Firmicutes_A	c__Clostridia	o__Oscillospirales	f__Ruminococcaceae	g__Firm-04	s__	1547.41	1030.25	1589.99	1069.54	1399.99	5433.91	1086.34	1398.71	927.18	730.73	1386.35	613.54	784.48	641.78	711.16	442.73	602.99	329.41	294.24	246.3	593.4	898.32	857.5	2051.74
MAG259	322.42	74.85	259.3	860.29	287.66	996.47	0.0735	0.108351	d__Bacteria	p__Firmicutes_A	c__Clostridia	o__Lachnospirales	f__Lachnospiraceae	g__Agathobacter	s__	534.32	207.28	835.48	56.59	376.76	527.9	409.13	569.26	33.68	84.89	186.42	47.36	1515.87	373.28	638.94	112.77	215.79	3615.33	508.85	253.7	717.71	710.21	1574.18	86.89
MAG26	4050.41	715.14	2477.32	1249.61	257.52	892.08	0.0004	0.0012857	d__Bacteria	p__Bacteroidota	c__Bacteroidia	o__Bacteroidales	f__UBA932	g__RC9	s__RC9 sp900320185	5521.45	2534.65	1627.23	1603.26	10238.9	3097.86	6122.82	5269.23	2316.32	4359.19	2362.18	3551.79	591.9	732.03	2565.48	523.19	3346.06	1550	669.9	558.93	598.74	1287.41	1101.21	1470.45
MAG260	484.72	154.9	536.6	734.72	124.6	431.64	0.0735	0.108351	d__Bacteria	p__Firmicutes_A	c__Clostridia	o__Oscillospirales	f__Ruminococcaceae	g__Ruminococcus	s__Ruminococcus flavefaciens_B	411.09	386.16	2001.35	837.62	265.64	704.65	116.6	158.19	21.98	507.51	114.69	291.2	1542.5	1154.17	1046.3	415.72	303.72	714.61	688.19	115.42	1054.63	181.29	928.74	671.31
MAG261	95.35	14.63	50.68	340.51	227.95	789.64	0.2987	0.361449	d__Archaea	p__Thermoplasmatota	c__Thermoplasmata	o__Methanomassiliicoccales	f__Methanomethylophilaceae	g__Methanomethylophilus	s__Methanomethylophilus sp001481295	117.76	233.34	75.85	77.91	94.59	102.47	37.88	57.73	67.95	52.18	111.89	114.63	44.62	52.56	32.59	52.99	39.14	134.35	401.64	2806.81	423.2	40.18	20.15	37.84
MAG262	496.77	149.31	517.22	504.86	68.6	237.65	0.2987	0.361449	d__Bacteria	p__Firmicutes_A	c__Clostridia	o__Lachnospirales	f__Lachnospiraceae	g__XBD2001	s__XBD2001 sp900116395	377.55	739.85	1983.8	402.94	611.9	457.2	104.56	118.4	51.13	375.72	155.03	583.14	262.76	486.35	650.75	251.35	633.32	674.06	274.68	451.42	104.86	888.15	685.34	695.3
MAG263	2652.25	264.59	916.56	1129.06	233.23	807.93	0.0008	0.00202795	d__Bacteria	p__Bacteroidota	c__Bacteroidia	o__Bacteroidales	f__Bacteroidaceae	g__UBA1786	s__	3873.13	3640.02	595.01	2276.89	3900.17	2757.34	2560.54	2600.55	1802.86	2708.43	2357.37	2754.71	2484.46	2337.15	578.24	250.64	1598.6	753.86	635.6	375.56	347.08	2131.1	1018.55	1037.92
MAG264	133.13	59.51	206.16	1377.27	355.63	1231.95	0.0003	0.000944584	d__Bacteria	p__Firmicutes_C	c__Negativicutes	o__Acidaminococcales	f__Acidaminococcaceae	g__Acidaminococcus	s__Acidaminococcus sp900315205	47.43	16.75	208.88	32.78	20.4	69.24	24.11	44.66	32.02	694.53	31.54	375.19	1382.51	372.89	693.22	1031.02	1032.06	455.84	591.83	2344.5	4471.84	58.69	1617.97	2474.81
MAG265	168.15	43.04	149.1	638.87	286.14	991.21	0.1659	0.213244	d__Bacteria	p__Firmicutes_A	c__Clostridia	o__Oscillospirales	f__Ruminococcaceae	g__Firm-04	s__	143.48	264.9	574.67	170.82	128.55	281.55	56.91	70.22	49.71	122.73	88.47	65.82	3117.56	309.71	218.03	128.37	47.34	728.57	192.52	298.13	2259.85	46	101.88	218.45
MAG266	3777.67	387.18	1341.23	1716.83	267.37	926.2	0.0003	0.000944584	d__Bacteria	p__Firmicutes_A	c__Clostridia	o__TANB77	f__CAG-508	g__CAG-269	s__	7158.34	3386.19	3227.09	2712.84	2775.58	5687.54	3534.67	3419.86	3062.06	2600.81	3955.55	3811.49	1716.29	1395.47	1999.8	1254.49	2091.56	1025.42	459.81	3331.68	323.03	1626.37	3131.59	2246.39
MAG267	495.9	81.28	281.56	622.95	101.74	352.43	0.5637	0.607281	d__Bacteria	p__Bacteroidota	c__Bacteroidia	o__Bacteroidales	f__UBA932	g__RC9	s__	618.68	291.75	81.39	461.83	550.7	213.46	419.86	920.14	133.24	921.01	643.38	695.3	340.46	667.04	1541.07	572.13	860.08	217.94	428.86	605.19	577.96	367.09	885.37	412.22
MAG268	249.66	114.75	397.5	349.19	103.62	358.96	0.1333	0.177222	d__Bacteria	p__Proteobacteria	c__Alphaproteobacteria	o__RF32	f__CAG-239	g__RUG410	s__RUG410 sp900313185	110.16	427.62	73.75	14.85	147.21	27.61	99.95	257.22	26.42	244.75	112.56	1453.8	451.43	345.95	249.16	421.88	414.17	1403.63	259.46	69.3	100.09	50.45	197.13	227.67
MAG269	1392.61	214.18	741.94	557.31	145.26	503.18	0.0012	0.0028435	d__Bacteria	p__Bacteroidota	c__Bacteroidia	o__Bacteroidales	f__UBA932	g__	s__	2671.93	774.47	630.82	1016.88	1983.34	2768.38	1107.58	1011.31	633.49	1288.44	1052.65	1772.05	584.15	384.86	418.04	101.59	556.71	1670.11	143.46	116.2	163.12	597.87	519.75	1431.91
MAG27	730.36	126.67	438.81	1422.95	403.68	1398.38	0.0833	0.119107	d__Bacteria	p__Bacteroidota	c__Bacteroidia	o__Bacteroidales	f__UBA932	g__RC9	s__RC9 sp900316675	534.34	1432.25	457.47	572.48	376.9	214.42	1071.41	1323.78	253.89	1334.58	592.6	600.23	1645.98	2391.23	5369.8	460.3	762.85	1986.61	939.9	636.42	242.19	697.39	765.57	1177.11
MAG270	669.93	101.58	351.88	597.71	335.44	1162	0.0377	0.0596048	d__Bacteria	p__Firmicutes_A	c__Clostridia	o__Lachnospirales	f__Lachnospiraceae	g__NK4A136	s__	976.5	831.04	1263.3	696.61	650.92	1238.16	639.98	302.12	247.25	535.09	346.56	311.6	728.07	365.29	156.45	33.82	171.49	4199.25	101.47	19.98	26.86	760.41	226.69	382.68
MAG271	852.7	136.88	474.16	717.26	187.66	650.08	0.2482	0.308127	d__Bacteria	p__Spirochaetota	c__Spirochaetia	o__Treponematales	f__Treponemataceae	g__Treponema_D	s__	472.7	1764.11	533.05	1607.13	1212.16	719.3	573.15	1107.17	374.1	766.1	307.7	795.77	365.52	1548.61	948.37	250.29	2306.96	309.1	171.42	647.65	172.42	230.47	888.64	767.68
MAG272	89.38	29.71	102.93	280.43	48.81	169.07	0.0027	0.00546148	d__Bacteria	p__Firmicutes_A	c__Clostridia	o__Lachnospirales	f__Lachnospiraceae	g__Lachnospira	s__Lachnospira multipara	55.89	69.95	74.83	32.59	89.28	62.1	30.75	48.25	410.31	62.89	44.28	91.46	575.61	284.54	304.76	207.02	28.47	434.54	551.36	266.91	105.6	275.57	206.68	124.05
MAG273	8225.79	1516.2	5252.28	5443.26	1165.92	4038.87	0.119	0.162729	d__Bacteria	p__Bacteroidota	c__Bacteroidia	o__Bacteroidales	f__Bacteroidaceae	g__Prevotella	s__Prevotella sp900316295	5521.17	4377.81	13231.9	12043.4	11584.7	12017.2	3765.32	4633.61	1891.34	19165	3565.11	6912.83	8540.12	6146.68	3800.63	778.34	11444.5	4070.6	1506.9	1644.3	838.01	9777.64	5242.87	11528.5
MAG274	1785.26	122.78	425.32	549.27	103.64	359.03	<.0001	0.000417244	d__Bacteria	p__Bacteroidota	c__Bacteroidia	o__Bacteroidales	f__UBA932	g__RC9	s__	2055.11	2009.07	1593.89	1515.47	1655.51	2674.13	1507.62	1515	2192.31	1248.1	2140.63	1316.23	380.14	477.44	608.21	162.36	971.88	1000.32	193.8	206.4	238.64	1216.64	390.89	744.47
MAG275	563.23	95	329.09	1027.45	232.14	804.15	0.0377	0.0596048	d__Bacteria	p__Firmicutes_A	c__Clostridia	o__Lachnospirales	f__Lachnospiraceae	g__	s__	471.3	276.71	1488.38	387.87	409.54	677.79	531.49	507.87	295.08	727.62	313.22	671.94	483.56	1039.88	1268.98	393.77	702.33	843.03	812.02	530.76	370.08	1290.01	3345.7	1249.3
MAG276	173.93	81.35	281.8	428.96	128.71	445.86	0.0496	0.0760553	d__Bacteria	p__Proteobacteria	c__Alphaproteobacteria	o__Acetobacterales	f__Acetobacteraceae	g__Acetobacter	s__Acetobacter pasteurianus_B	182.32	78.21	61.94	891.45	313.01	548.3	2.29	1.19	2.66	1.5	2.32	1.94	212.55	1155.15	430.63	460.38	1439.39	327.65	247.78	467.24	398.61	1.79	2.75	3.59
MAG277	22.55	7.88	27.28	344.03	55.24	191.35	<.0001	0.000417244	d__Bacteria	p__Firmicutes_C	c__Negativicutes	o__Veillonellales	f__Dialisteraceae	g__Allisonella	s__Allisonella histaminiformans	7.17	7.81	99.42	27.23	14.68	39.12	6.92	13.48	4.46	38.35	3.29	8.64	267.87	326.05	396.47	611.87	457.37	218.51	739.88	189.68	300.97	71.97	390.76	157.01
MAG278	515.81	99.32	344.07	484.07	89.5	310.05	0.9081	0.923029	d__Bacteria	p__Firmicutes_A	c__Clostridia	o__Lachnospirales	f__Lachnospiraceae	g__AC2028	s__	641.74	383.54	1115.7	499.94	605.05	1126.53	171.79	270.55	54.75	698.01	211.84	410.24	878.93	698.79	335.44	72.69	271.38	857.16	183.24	442.71	201.16	339.93	508.47	1018.88
MAG279	1616.11	209.97	727.37	1061.43	91.26	316.15	0.0153	0.0263569	d__Bacteria	p__Firmicutes_A	c__Clostridia	o__Saccharofermentanales	f__Saccharofermentanaceae	g__Saccharofermentans	s__	1607.24	1718.73	2926.42	1061.97	1539.84	3219.67	1336.51	1605.52	1245.96	1120.41	980.51	1030.5	1184.18	1293.08	718.83	865.58	851.04	773.5	1118.6	801.27	957.21	1141.9	1165.01	1866.92
MAG28	2552.11	298.51	1034.07	2481.73	504.58	1747.92	0.5637	0.607281	d__Bacteria	p__Bacteroidota	c__Bacteroidia	o__Bacteroidales	f__Bacteroidaceae	g__UBA4334	s__UBA4334 sp900316975	3006.1	3466.77	1370.38	3022.78	2230.26	1822.47	1741.16	3850.79	1233.88	3015.18	1540.02	4325.5	4904.94	4926.31	3388.26	2416.53	5467.66	796.51	877.61	1385.74	752.46	1584.96	1949.12	1330.64
MAG280	4398.14	318.05	1101.76	3049.49	392.35	1359.13	0.0282	0.0463872	d__Bacteria	p__Bacteroidota	c__Bacteroidia	o__Bacteroidales	f__UBA932	g__RC9	s__	5013.47	5136.36	2806.93	2941.66	3923.92	4307.4	6136.03	6333.75	4145.96	3987.47	4383.74	3661	4847.77	2940.75	2832.39	1357.22	2293.22	5394.18	1884.51	1318.59	2205.16	4543.66	3035.6	3940.88
MAG281	622.56	178.28	617.58	1217.2	426.25	1476.58	0.0941	0.13237	d__Bacteria	p__Firmicutes_A	c__Clostridia	o__Oscillospirales	f__Ruminococcaceae	g__Ruminococcus	s__Ruminococcus flavefaciens_L	308.23	620.43	608.79	1726.49	1403.93	322.37	107.83	105.66	55.99	1624.49	66.04	520.49	760.92	636.21	398.18	5584.55	756.55	368.68	769.89	395.79	1547.38	133.86	1992.71	1261.68
MAG282	2852.01	323.82	1121.75	894.55	267.21	925.64	0.0007	0.00172365	d__Bacteria	p__Firmicutes_C	c__Negativicutes	o__Selenomonadales	f__Selenomonadaceae	g__Anaerovibrio	s__	4677.54	1180.32	5042.63	2554.03	2392.3	1858.4	2779.2	2091.3	2598	3496.25	3303.14	2251.04	312.93	1277.66	966.07	96.08	2369.57	462.94	155.42	93.89	96.27	2913.86	914.69	1075.27
MAG283	248.5	109.93	380.81	630.77	184.83	640.26	0.0327	0.0526515	d__Bacteria	p__Firmicutes_A	c__Clostridia	o__Oscillospirales	f__Ruminococcaceae	g__Ruminococcus_D	s__	87.03	90.47	1354.94	68.18	138.04	98.98	259.65	205.02	14.27	580.88	56.14	28.37	1530.07	741.26	265.21	146.95	2124.29	57.68	1006.15	89.64	124	560.1	529.16	394.7
MAG284	9157.52	2704.6	9369	20922.9	9019.93	31246	0.3865	0.45246	d__Bacteria	p__Bacteroidota	c__Bacteroidia	o__Bacteroidales	f__Bacteroidaceae	g__UBA3839	s__	8833.99	5068.14	10511.2	9106.75	5748.55	38135.2	3057.75	5891.54	4713.46	7691.5	5589.49	5542.71	6627.11	12215.4	108208	55949.2	2501.95	6621.44	7202.08	24303.7	14205.5	3519.92	3120.49	6599.75
MAG285	199.17	19.53	67.64	789.22	525.63	1820.83	0.4884	0.542412	d__Bacteria	p__Bacteroidota	c__Bacteroidia	o__Bacteroidales	f__Bacteroidaceae	g__RUG210	s__	226.44	308.71	337.43	253.73	180.85	124.58	154.41	158.22	150.42	160.6	169.93	164.66	138.34	448.75	1432.9	36.56	146.72	80.99	45.56	164.92	120.77	199.2	212.9	6442.99
MAG286	2052.73	274.94	952.4	1308.78	233.11	807.5	0.0833	0.119107	d__Bacteria	p__Bacteroidota	c__Bacteroidia	o__Bacteroidales	f__Bacteroidaceae	g__Prevotella	s__Prevotella sp900314915	1676.91	1444.15	1712.22	1579.01	1509.46	2326.97	2495.42	2504.13	1511.34	4796.97	1505.69	1570.52	1900.55	1687.17	1776.95	1244.62	818.27	468.36	578.12	654.26	560.04	3026.05	799.96	2190.97
MAG287	412.06	178.31	617.7	563.37	178.4	618.01	0.3263	0.390533	d__Bacteria	p__Proteobacteria	c__Alphaproteobacteria	o__RF32	f__CAG-239	g__RUG410	s__RUG410 sp900313155	182.9	199.63	45.49	58.2	262.86	6.48	93.66	668.34	345.22	677.79	162.18	2241.96	248.54	698.71	426.05	37.99	652.17	299.44	67.68	235.72	63.89	432.6	1938.86	1658.74
MAG288	277.14	36.06	124.93	469.05	102.62	355.49	0.2987	0.361449	d__Bacteria	p__Firmicutes	c__Bacilli	o__RFN20	f__CAG-826	g__UBA733	s__	129.6	366.57	168.43	110.93	347.91	319.88	294.03	515.47	341.94	100.24	307.23	323.43	102.87	750.71	141.44	297.01	105.9	527.52	604.68	1282.15	191.22	568.47	272.53	784.13
MAG289	1861.96	450.77	1561.52	541.22	151.78	525.8	0.0018	0.00393711	d__Bacteria	p__Firmicutes_A	c__Clostridia	o__Lachnospirales	f__Lachnospiraceae	g__UBA6987	s__	1989.77	2040.14	5796.46	1105.65	765.33	2660.51	957.57	1143.48	1301.1	453.54	3672.19	457.78	944.13	319.5	262.63	234.61	232.44	743	307	130.6	123.56	1164.87	214.95	1817.39
MAG29	325.85	101.91	353.02	1717.17	315.73	1093.71	0.0007	0.00172365	d__Bacteria	p__Firmicutes_A	c__Clostridia	o__Oscillospirales	f__Ruminococcaceae	g__Ruminococcus	s__Ruminococcus sp900319195	258.83	116.9	1235.34	377.41	353.16	137.92	126.85	203.54	35.9	806.91	61.5	195.91	2073.36	1401.74	1938.59	4129.42	835.73	328.38	2824.18	1945.52	2103.25	169.98	997.57	1858.35
MAG290	452.47	71.67	248.28	432	133.06	460.92	0.4189	0.48004	d__Bacteria	p__Firmicutes_A	c__Clostridia	o__Saccharofermentanales	f__Saccharofermentanaceae	g__Saccharofermentans	s__Saccharofermentans sp900111435	874.48	413.02	788.86	545.24	452.49	736.58	367.34	355.24	89.79	441.44	212.99	152.11	378.5	583.96	571.38	116.6	442.21	1775.02	108.69	103.64	35.34	326.78	368.39	373.49
MAG291	523.04	109.71	380.03	2308.03	456.54	1581.49	0.001	0.00245132	d__Bacteria	p__Firmicutes_A	c__Clostridia	o__Oscillospirales	f__Ruminococcaceae	g__Ruminococcus_D	s__	460	404.49	1041.93	375.26	268.53	619.66	224.84	530.86	94.28	1408.58	170.25	677.85	3216.95	3861.82	1017.77	1581.02	2251.15	798.65	1141.21	834.8	3720.68	372.55	3628.63	5271.08
MAG292	201.21	15.99	55.38	369.52	307.14	1063.95	0.0022	0.00459767	d__Bacteria	p__Firmicutes_A	c__Clostridia	o__Oscillospirales	f__Acutalibacteraceae	g__UBA1213	s__	138.54	193.29	255.29	248.16	107.23	188.74	232.52	138.68	224.5	199.68	301.14	186.72	123.7	48.96	38.28	11.98	185.19	3742.83	14.51	9.65	8.13	141.42	25.31	84.28
MAG293	1082.8	85.78	297.15	453.54	74.09	256.65	0.0001	0.000617624	d__Bacteria	p__Firmicutes_A	c__Clostridia	o__Oscillospirales	f__Oscillospiraceae	g__	s__	938.14	1499.08	1328.97	627.74	904.25	1435.27	982.21	921.62	1485.27	786.23	1221.25	863.53	758.64	592.31	338.44	103.45	384.17	510.7	287.39	128.43	307.72	874.13	348.78	808.32
MAG294	496.85	160.15	554.79	242.91	66.27	229.58	0.0833	0.119107	d__Bacteria	p__Firmicutes_A	c__Clostridia	o__Oscillospirales	f__Ruminococcaceae	g__Firm-04	s__Firm-04 sp001603005	427.33	461.21	1069.93	406.02	400.97	2061.39	242.82	193.57	100.99	199.86	259.04	139.05	365.61	118.12	119.96	37.89	143.53	698.81	59.09	34	111.26	172.55	446.14	607.95
MAG295	782.74	103.18	357.44	1121.02	264.06	914.72	0.5637	0.607281	d__Bacteria	p__Firmicutes_A	c__Clostridia	o__Peptostreptococcales	f__Anaerovoracaceae	g__RUG754	s__RUG754 sp900315895	1103.5	549.12	644.61	287.61	899.82	1372.58	412.56	480.07	514.9	1252.51	775.17	1100.42	2341.13	1252.99	316.46	406.98	804.67	925.87	3424.26	447.36	810.42	1166.44	384.38	1171.24
MAG296	635.28	104.99	363.71	703.92	95.06	329.31	0.4884	0.542412	d__Bacteria	p__Firmicutes_A	c__Clostridia	o__Lachnospirales	f__Lachnospiraceae	g__NK4A136	s__NK4A136 sp002393955	730.65	599.04	1540.19	550.07	578.06	810.09	347.57	466.56	148.36	1013.2	438.43	401.08	970.12	972.09	657.58	178.4	739.43	1164.89	406.7	297.13	493.25	519.69	921.1	1126.68
MAG297	377.91	68.6	237.63	330.19	66.72	231.13	0.4884	0.542412	d__Bacteria	p__Firmicutes_A	c__Clostridia	o__Oscillospirales	f__Acutalibacteraceae	g__CAG-177	s__	322.77	157.7	263.51	408.91	228.52	687.22	572.48	842.74	75.73	273.26	151.13	550.96	803.39	610.02	256.16	191.51	216.65	214.21	523.52	89.19	170.11	533.14	64.77	289.65
MAG298	596.39	92.86	321.66	460.34	61.68	213.67	0.204	0.256216	d__Bacteria	p__Firmicutes_A	c__Clostridia	o__Lachnospirales	f__Lachnospiraceae	g__	s__	681.4	370.16	710.57	425.6	414.26	1506.57	717.97	656.74	373.85	490.01	512.55	297.02	614.61	454.83	626.28	314.97	324.43	623.15	281.8	99.73	316.9	606.84	382.2	878.29
MAG299	67.27	5.46	18.9	837.61	237.01	821.04	0.0001	0.000557131	d__Bacteria	p__Bacteroidota	c__Bacteroidia	o__Bacteroidales	f__Bacteroidaceae	g__UBA6398	s__UBA6398 sp900314335	91.49	112.25	54.06	85.06	66.23	59.04	56.41	52.98	55.93	62.97	53.56	57.2	892.89	510.43	452.71	1642.82	123.98	185.1	1139.2	1522.88	2813.63	60.31	487.54	219.88
MAG3	795.39	83.93	290.74	1207.58	186.99	647.74	0.0243	0.0406036	d__Bacteria	p__Bacteroidota	c__Bacteroidia	o__Bacteroidales	f__Bacteroidaceae	g__Phocaeicola	s__	940.13	927.33	279.04	899.79	910.76	445.56	664.75	912.93	501.36	1115.78	661.57	1285.65	3101.52	1274.79	1255.56	1288.26	1281.12	1249.32	1073.43	987.8	538.51	722.82	947.29	770.51
MAG30	2414.51	353.91	1225.98	2115.35	318.89	1104.66	0.3263	0.390533	d__Bacteria	p__Firmicutes_A	c__Clostridia	o__Saccharofermentanales	f__Saccharofermentanaceae	g__Saccharofermentans	s__	2496.66	1603.34	2790.64	1797.33	2296.36	5982.67	2156.62	2261.68	1431.73	2926.2	1561.43	1669.42	1383.54	3764.55	1522.6	3201.82	1841.82	1522.44	1217.7	633.32	1312.71	3389.94	1794.48	3799.26
MAG300	2180.22	342.76	1187.36	911.7	167.94	581.78	0.0005	0.00147325	d__Bacteria	p__Bacteroidota	c__Bacteroidia	o__Bacteroidales	f__Bacteroidaceae	g__Prevotella	s__Prevotella sp900317305	2211.33	2274.3	1250.97	2016.41	1762.86	5804.22	1414.51	1670.8	2166.21	1569.41	2120.2	1901.43	650.41	906.23	1437.23	632.2	1084.7	1683.16	232.04	377.74	216.54	1391.95	426.81	1901.33
MAG301	589.22	46.47	160.99	356.41	46.15	159.86	0.0022	0.00459767	d__Bacteria	p__Firmicutes_A	c__Clostridia	o__Peptostreptococcales	f__Anaerovoracaceae	g__UBA1764	s__	412.11	460.7	674.88	450.6	911.06	702.57	621.49	540.58	429.3	645.33	436.15	785.83	253.96	302.08	558.04	169.83	345.24	374.8	254.5	157.59	267.89	365.71	585.91	641.42
MAG302	2192.16	281.7	975.82	492.51	245.74	851.28	0.0003	0.000944584	d__Bacteria	p__Bacteroidota	c__Bacteroidia	o__Bacteroidales	f__Muribaculaceae	g__C941	s__	4015.65	2664.63	3540.29	1594.55	1505.64	2208.85	1143.61	1634.24	2301.45	877.33	3128.77	1690.86	81.89	234.55	480.3	47.99	738.83	50.54	160.69	66.75	77.54	3053.74	100.26	816.99
MAG303	33.24	4.76	16.47	1094.63	346.87	1201.6	0.0001	0.000557131	d__Bacteria	p__Firmicutes_A	c__Clostridia	o__Lachnospirales	f__Lachnospiraceae	g__CAG-791	s__CAG-791 sp900317475	28.57	29.9	50.43	17.44	30.25	78.77	26.8	22.43	26.53	23.71	28.24	35.78	82.06	1319.46	3535.38	1280.38	30.74	326.81	570.03	474.22	2478.75	40.3	2739.51	257.97
MAG304	5082.48	927.42	3212.67	1534.92	371.65	1287.44	0.0022	0.00459767	d__Bacteria	p__Bacteroidota	c__Bacteroidia	o__Bacteroidales	f__Bacteroidaceae	g__UBA4372	s__	10730.2	3813.93	1466.08	4018.34	2415.63	7521.9	7689.58	10058.9	5084.16	2426.35	4375.09	1389.63	2453.49	3684.52	592.13	201.16	1740.78	1853.42	533.38	284.17	467.69	3943.13	903.29	1761.87
MAG305	1126.89	97.64	338.23	1232.96	250.58	868.05	0.4884	0.542412	d__Bacteria	p__Firmicutes_A	c__Clostridia	o__TANB77	f__CAG-508	g__CAG-269	s__CAG-269 sp001916005	1468.41	707.45	925.63	958.8	959.92	1659.53	952.91	963.92	1732.42	775.7	1096.83	1321.19	808.11	2428.95	2071.96	1194.47	428.94	670.28	650.63	1601.78	270.04	834.3	797.95	3038.16
MAG306	1247.69	221.15	766.09	562.17	99.22	343.71	0.0018	0.00393711	d__Bacteria	p__Firmicutes_A	c__Clostridia	o__Lachnospirales	f__Lachnospiraceae	g__	s__	992.5	782.32	2950.69	634.12	624.3	1872.15	1442.43	855.03	800.87	855.38	2403.03	759.42	711.07	461.97	533.76	295.65	417.56	503.06	381.13	149.93	502.33	1013.42	364.31	1411.86
MAG307	59.77	7.32	25.36	368.9	102.17	353.94	0.0433	0.067299	d__Bacteria	p__Firmicutes_A	c__Clostridia	o__Lachnospirales	f__Lachnospiraceae	g__CAG-791	s__CAG-791 sp900317555	50.08	49.78	120.45	44.1	40.41	95.57	48.92	37.22	71.05	36.72	62.96	60	39.43	51.56	114.6	346.53	70.87	708.9	921.27	806.27	782.54	41.3	501.39	42.16
MAG308	547.38	218.89	758.24	1073.19	277.42	961.02	0.1333	0.177222	d__Bacteria	p__Firmicutes_A	c__Clostridia	o__Lachnospirales	f__Lachnospiraceae	g__	s__	104.56	1277.5	1415.61	158.5	2453.7	218.01	112.79	315.55	120.65	107.55	161.29	122.8	3254.06	88.57	389.61	140.34	1214.59	1919.44	448.79	646.43	1672.36	113.03	1221.45	1769.58
MAG309	79.44	17.99	62.33	466.54	222.3	770.06	0.2987	0.361449	d__Bacteria	p__Bacteroidota	c__Bacteroidia	o__Bacteroidales	f__Paludibacteraceae	g__RF16	s__	105.04	269.03	57.25	54.36	80.47	46.41	57.32	51.03	40.61	79.21	51.84	60.66	180.81	796.98	26.5	44.09	132.49	772.66	17.49	68.89	18.47	584.61	225.77	2729.77
MAG31	5978.29	1452.89	5032.95	19830.3	3570.71	12369.3	0.0015	0.00336637	d__Bacteria	p__Bacteroidota	c__Bacteroidia	o__Bacteroidales	f__Bacteroidaceae	g__Prevotella	s__Prevotella bryantii	5073.99	4621.97	3838.19	17786.8	13587.3	1068.58	3320.77	7470.31	783.68	4835.47	2556.58	6795.79	11568.4	22101.1	38456.5	14188.2	38012.4	10738	39746.5	20972.8	9310.34	4178.68	15720.1	12970.5
MAG310	136.35	24.84	86.06	458.36	213.46	739.46	0.5637	0.607281	d__Bacteria	p__Firmicutes_A	c__Clostridia	o__Oscillospirales	f__Acutalibacteraceae	g__Eubacterium_R	s__	381.51	101.29	154.62	111.11	108.96	137.21	51.27	127.08	32.75	151.58	132.35	146.44	69.13	367.19	114.12	973.61	42.04	2584.95	825.91	107.08	21.98	161.51	69.79	162.95
MAG311	3113.17	407.61	1412	669.13	220.25	762.97	0.0002	0.000712745	d__Bacteria	p__Bacteroidota	c__Bacteroidia	o__Bacteroidales	f__P3	g__UBA1711	s__UBA1711 sp002368955	2399.08	2360.92	2229.08	6328.86	2809.69	5375.5	3595.06	2084.57	2119.66	2162.38	2144.68	3748.53	176.81	1160.83	392.43	86.04	1539.86	2596.08	139.24	136.97	56.04	760.94	391.29	593.05
MAG312	200.45	56.57	195.98	708.7	95.96	332.41	0.0004	0.0012857	d__Bacteria	p__Firmicutes_A	c__Clostridia	o__Lachnospirales	f__Lachnospiraceae	g__CAG-127	s__	88.54	91.06	556.18	43.89	157.89	194.79	127.61	337.27	29.57	604.1	46.52	127.97	404.31	574.26	698.23	1133.06	1077.72	783.75	909.79	628.64	193.39	377.97	465.31	1257.99
MAG313	626.74	146.59	507.81	748.13	190.89	661.27	0.954	0.958397	d__Bacteria	p__Firmicutes_A	c__Clostridia	o__Lachnospirales	f__Lachnospiraceae	g__FD2005	s__	272.92	503.59	992.37	279.36	429.13	501.56	529.32	1136.34	16.96	1863.71	195.5	800.13	1671.52	1065.39	736.47	253.98	230.77	95.43	387.01	191.34	175.8	1943.28	635.93	1590.64
MAG314	251.37	23.7	82.09	365.72	33.36	115.56	0.0209	0.0354432	d__Bacteria	p__Bacteroidota	c__Bacteroidia	o__Bacteroidales	f__UBA932	g__RC9	s__	218.45	417.95	153.37	127.1	229.95	204.68	314.25	340.35	233.96	266.77	203.97	305.64	343.15	594.64	375.26	321.35	302.6	523.33	339.23	444.28	372.67	196.72	375.6	199.81
MAG315	46.05	6.02	20.85	257.03	76	263.27	0.0022	0.00459767	d__Bacteria	p__Firmicutes_A	c__Clostridia	o__Lachnospirales	f__Lachnospiraceae	g__TF01-11	s__TF01-11 sp000436755	37.91	54.29	98.15	56.69	47.89	58.16	31.93	31.03	15.42	35.59	52.14	33.4	590.75	401.34	97.32	322.9	33.69	153.6	265.22	897.95	75.63	35.13	125.64	85.21
MAG316	1265.39	147.24	510.05	570.14	128.13	443.86	0.0022	0.00459767	d__Bacteria	p__Bacteroidota	c__Bacteroidia	o__Bacteroidales	f__Bacteroidaceae	g__UBA4372	s__UBA4372 sp900320715	1102.13	1865.05	900.98	915.92	1000.4	384.88	1638.58	1011.9	2222.59	1684.73	1032.94	1424.61	652.09	758.54	826.96	71.78	283.83	155.54	215.94	391.7	209.28	1407.59	545.09	1323.3
MAG317	2091.63	163.89	567.72	2262	405.35	1404.19	0.954	0.958397	d__Bacteria	p__Bacteroidota	c__Bacteroidia	o__Bacteroidales	f__Bacteroidaceae	g__Prevotella	s__	2403.94	2737.78	1103.41	3152.01	1949.43	1568.8	2094.96	1987.75	1908.74	2596.95	2083.91	1511.84	2448.74	3379.9	2016.15	743.62	4322.53	801.01	499.04	1384.19	1388.55	2109.1	4647.28	3403.91
MAG318	264.11	26.61	92.2	555.31	107.02	370.73	0.0153	0.0263569	d__Bacteria	p__Firmicutes_A	c__Clostridia_A	o__Christensenellales	f__UMGS416	g__	s__	239.77	410.23	379.65	157.85	217.35	363.95	200.69	162.29	359.83	160.46	272.9	244.34	1408.02	821.78	543.62	95.93	172.86	456.09	459.27	355.92	589.31	347.51	384.81	1028.63
MAG319	151.48	58.14	201.39	440.42	148.62	514.85	0.0327	0.0526515	d__Bacteria	p__Firmicutes_A	c__Clostridia	o__Lachnospirales	f__Lachnospiraceae	g__Eubacterium_F	s__	64.17	561.24	585.47	113.58	160.25	53.19	18.51	61.63	10	45.01	45.48	99.18	1447.18	204.95	80.05	61.47	199.63	833.99	174.13	274.71	1437.55	38.76	114.95	417.69
MAG32	173.68	19.52	67.62	1591.31	351.81	1218.7	0.0005	0.00147325	d__Bacteria	p__Firmicutes_A	c__Clostridia	o__Lachnospirales	f__Lachnospiraceae	g__Agathobacter	s__Agathobacter faecis	117.11	103.94	219.91	281.92	126.39	208.47	144.14	302.58	134.95	199.24	115.83	129.62	1667.11	575.15	1129.12	4577.64	663.75	667.58	1903.12	905.56	1973.49	103.43	2457.85	2471.89
MAG320	275.81	117.59	407.33	3751.37	914.54	3168.07	0.0002	0.000712745	d__Bacteria	p__Firmicutes_C	c__Negativicutes	o__Selenomonadales	f__Selenomonadaceae	g__Selenomonas_C	s__Selenomonas_C sp002351185	203.25	127.87	1537.39	165.12	131.57	373.03	87.31	160.78	29.9	269.73	91.79	131.95	5715.46	2145.53	2336.38	5452.67	1665.02	3942.17	8513.23	2170.35	10372.7	151.79	1748.89	802.28
MAG321	504.46	78.61	272.31	822.14	102.86	356.33	0.0282	0.0463872	d__Bacteria	p__Bacteroidota	c__Bacteroidia	o__Bacteroidales	f__Bacteroidaceae	g__Phocaeicola	s__	646.56	400.15	134.35	545.87	563.69	214.4	446.78	705.58	169.93	885.9	352.2	988.1	1683.07	962.16	1021.08	752.35	1030.81	794.55	673.54	872.17	299.07	504.07	834.82	437.99
MAG322	192.38	46.77	162	1076.08	131.43	455.27	0.0002	0.000847995	d__Bacteria	p__Firmicutes_A	c__Clostridia	o__Lachnospirales	f__Lachnospiraceae	g__Oribacterium	s__Oribacterium sp900318695	124.33	169.1	637.28	275.03	159.59	159.84	77.01	134.23	37.2	331.6	100.08	103.25	1561.26	1640.27	1425.92	1228.16	887.36	1292.54	1423.09	685.76	800.49	126.48	1236.69	604.88
MAG323	1167.04	213.89	740.94	511.55	217.5	753.43	0.0056	0.0105333	d__Bacteria	p__Firmicutes_A	c__Clostridia	o__Peptostreptococcales	f__Anaerovoracaceae	g__RUG754	s__	1956.32	902.9	1350.21	294.21	1194.79	737.08	454.85	796.68	524.37	2566.48	923.75	2302.88	275.37	1070.3	301.28	111.78	470.7	293.19	94.19	20.41	66.07	2736.72	398.76	299.82
MAG324	3798.69	354.94	1229.56	1940.13	275.23	953.42	0.0027	0.00546148	d__Bacteria	p__Bacteroidota	c__Bacteroidia	o__Bacteroidales	f__Bacteroidaceae	g__UBA4372	s__	3403.15	4843.04	2604.34	3047.75	5491.58	2342.74	4475.96	3279.49	3470.89	5535.75	2057.37	5032.16	2037.28	2673.64	2715.92	713.23	3531.28	1237.55	789.92	925.46	1033.43	2411.46	2738.51	2473.89
MAG325	889.87	209.25	724.87	541.47	106.26	368.08	0.1333	0.177222	d__Bacteria	p__Firmicutes	c__Bacilli	o__RFN20	f__CAG-288	g__UBA7642	s__UBA7642 sp900313465	654.07	723.35	197.54	346.47	872.36	705.48	584.27	1430.01	2939.21	348.58	888.97	988.17	37.71	872.69	286.25	475	633.58	803.44	647.64	695.36	198.27	1314.31	67.76	465.6
MAG326	4003.2	842.5	2918.49	1042.2	367.82	1274.17	0.0003	0.000944584	d__Bacteria	p__Firmicutes_A	c__Clostridia	o__Oscillospirales	f__Acutalibacteraceae	g__RUG420	s__RUG420 sp900317085	11853.2	2976.86	1801.76	1758.01	1736.81	5713.56	3911.35	3045.18	5528.61	1328.92	5330.44	3053.71	1092.94	1402.06	450.93	454.23	1105.84	498	529.89	381.96	529.65	4943.14	352.27	765.5
MAG327	548.94	114.66	397.18	1636.9	315.67	1093.52	0.013	0.0230917	d__Bacteria	p__Firmicutes_A	c__Clostridia	o__TANB77	f__CAG-508	g__	s__	414.3	266.15	620.54	185.18	384	345.92	472.76	1253.14	342.85	1465.82	339.69	496.92	2244.09	2978.06	1285.56	275	514.27	536.96	2159.81	1845.09	245.67	1379.7	3075.64	3102.98
MAG328	1265.31	186.81	647.13	1112.97	212.61	736.51	0.5254	0.577509	d__Bacteria	p__Firmicutes_A	c__Clostridia	o__Oscillospirales	f__Ruminococcaceae	g__Ruminococcus	s__	912.84	929.04	2790.38	916.32	1225.88	2043.83	1471.97	1348.99	373.63	744.13	1523.31	903.38	601.6	2154.16	1974.31	530.74	1342.39	451.55	748.5	164.64	444.8	2238.49	1660.86	1043.59
MAG329	832.42	197.71	684.88	585.75	202.69	702.14	0.1333	0.177222	d__Bacteria	p__Firmicutes_A	c__Clostridia	o__Oscillospirales	f__Acutalibacteraceae	g__UBA737	s__UBA737 sp002371985	628.03	727.09	620.23	118.98	2602.77	838.2	138.53	703.63	93.22	1297.27	1151.02	1070.09	88.68	587.25	606.67	344.55	395.08	47.32	318.69	149.85	206.07	2641	979.98	663.83
MAG33	10766.2	1714	5937.47	5159.06	751.85	2604.47	0.0039	0.00771341	d__Bacteria	p__Firmicutes_A	c__Clostridia	o__Oscillospirales	f__Oscillospiraceae	g__CAG-83	s__	6199.32	5354.13	26936.7	3563.83	9979.84	8902.96	10197.5	14303.6	8795.12	10875.3	11730.6	12355.8	7851.85	3742.38	5845.14	3445.48	2894.09	3838.73	4985.36	1880.77	4333.09	9113.35	3727.2	10251.3
MAG330	116.34	13.68	47.38	798.53	256.65	889.06	0.0153	0.0263569	d__Bacteria	p__Firmicutes_A	c__Clostridia	o__Lachnospirales	f__Lachnospiraceae	g__Eubacterium_H	s__Eubacterium_H sp900318405	119.82	61.52	94.48	73.13	66.34	145.52	156.11	103.86	229.95	86.24	123.08	136.01	1476.19	2183.26	1433.9	2577.96	54.01	128.99	534.83	193.74	294.15	85.16	496.77	123.42
MAG331	2214.44	155.56	538.87	897.35	200.59	694.85	0.0003	0.00110952	d__Bacteria	p__Bacteroidota	c__Bacteroidia	o__Bacteroidales	f__UBA932	g__UBA1232	s__	1798.18	2826.98	2455.05	1773.63	1992.53	1377.06	3054.32	2990.64	1726.8	2235.12	1955.51	2387.5	1062.18	758.65	724.29	321.86	878.94	1088.57	452.19	416.92	448.97	2941.71	679.09	994.79
MAG332	187.58	13.64	47.26	1935.85	806.79	2794.8	0.0012	0.0028435	d__Bacteria	p__Bacteroidota	c__Bacteroidia	o__Bacteroidales	f__Paludibacteraceae	g__UBA4363	s__UBA4363 sp002393965	252.12	204.79	99.73	241.99	155.22	124.68	187.69	168.22	213.2	193.58	241.98	167.72	1248.31	1566.98	594.28	1745.1	412.41	794.98	2010.46	3133.15	1003.33	165.21	175.58	10380.4
MAG333	2112.62	244.02	845.31	525.44	153.98	533.4	0.0001	0.000617624	d__Bacteria	p__Firmicutes_A	c__Clostridia	o__Oscillospirales	f__CAG-272	g__UMGS1696	s__	3399.35	2117.22	895.02	1812.87	1448.86	2971.05	2607.45	2333.8	2181.53	641.21	3077.03	1866.03	546.94	777.32	380.37	130.82	351.43	507.83	241.77	38.18	162.4	2075.92	501.79	590.46
MAG334	1374.54	520.86	1804.32	601.82	160.52	556.06	0.3263	0.390533	d__Bacteria	p__Firmicutes_A	c__Clostridia	o__Oscillospirales	f__Ruminococcaceae	g__Ruminococcus	s__Ruminococcus flavefaciens_H	877.32	1552.78	6571.09	1783.02	1003.5	1244.42	219.94	225.79	42.34	2473.01	98.43	402.83	555.56	1293.41	487.77	118.03	341.22	687.69	144.99	59.93	202.7	232.01	1500.53	1597.99
MAG335	989.35	103.22	357.57	696.6	80.15	277.63	0.0282	0.0463872	d__Bacteria	p__Bacteroidota	c__Bacteroidia	o__Bacteroidales	f__UBA932	g__RC9	s__	1283.45	1881.13	698.43	662.83	960.08	1189.69	654.95	751.37	1018.2	666.17	1125.65	980.28	670.08	528.32	867.1	318.13	862.15	1343.22	484.6	584.29	442.26	908.93	547.06	803.1
MAG336	1811.13	522.73	1810.77	317.9	72.31	250.48	<.0001	0.000417244	d__Bacteria	p__Verrucomicrobiota	c__Kiritimatiellae	o__RFP12	f__UBA1067	g__UBA1067	s__	1476.49	7369.04	1799.47	1198.6	2418.57	1162.22	1462.53	670.98	1002.1	773.24	1212.46	1187.82	363.77	506.81	399.06	25.33	568.28	252.72	49.26	131.27	71.62	881.75	231.74	333.24
MAG337	2105.43	263.73	913.59	1943.04	414.04	1434.27	0.3865	0.45246	d__Bacteria	p__Bacteroidota	c__Bacteroidia	o__Bacteroidales	f__UBA932	g__RC9	s__	2727.5	1903.22	897.01	879.76	2119.6	1430.69	1604.88	2692.47	4128.45	2815.85	2289.93	1775.81	1794.94	1041.22	2522.61	631.64	2879.16	1211.97	683.35	996.87	1270.48	5361.28	1202.38	3720.53
MAG338	7559.63	1614.2	5591.75	1121.27	280.12	970.36	<.0001	0.000417244	d__Bacteria	p__Bacteroidota	c__Bacteroidia	o__Bacteroidales	f__Muribaculaceae	g__C941	s__C941 sp900318065	5317.6	7661.46	22994.9	5511.25	11180	11559	5107.14	3533.65	4370.01	6503.31	4081.38	2895.87	786.5	862.33	1662.33	766.2	1467.19	234.37	874.3	896.51	392.92	3841.63	266.43	1404.47
MAG339	810.42	100.66	348.69	558.87	82.98	287.46	0.0496	0.0760553	d__Bacteria	p__Firmicutes_A	c__Clostridia	o__Saccharofermentanales	f__Saccharofermentanaceae	g__Saccharofermentans	s__	891.69	281.56	1052.44	822.97	358.22	1510.8	748.11	879.91	1256.81	686.9	619.07	616.58	608.77	477.52	221.43	722.49	1159.34	350.66	349.03	236.08	567.79	635.37	399.74	978.17
MAG34	16.52	3.05	10.57	1663.68	413.92	1433.85	<.0001	0.000417244	d__Bacteria	p__Firmicutes_C	c__Negativicutes	o__Selenomonadales	f__Selenomonadaceae	g__RUG114	s__RUG114 sp900315615	34.27	6.53	39.43	19.69	10.72	19.83	9.94	14.31	6.14	16.47	12.12	8.8	1748.74	1229	3237.75	4715.54	135.37	689.23	3545.85	862.11	1237.95	33.6	1271.13	1257.89
MAG340	1155.38	150.71	522.06	461.74	90.65	314.01	0.0007	0.00172365	d__Bacteria	p__Firmicutes_A	c__Clostridia	o__Oscillospirales	f__Oscillospiraceae	g__UBA1774	s__	1308.8	2557	819.17	903.41	1341.04	936.97	1348.62	667.38	488.67	1086.14	1099.26	1308.15	950.08	796.85	322.59	69.3	454.08	452.73	263.94	75.04	94.56	922.02	597.99	541.74
MAG341	2772.58	523.02	1811.78	901.28	180.42	625	0.0005	0.00147325	d__Bacteria	p__Bacteroidota	c__Bacteroidia	o__Bacteroidales	f__UBA932	g__RC9	s__RC9 sp900320185	3744.36	1537.26	966.29	1101.21	7240.95	1996.69	4396.52	3736.71	1444.83	3058.47	1533.59	2514.05	421.59	544.23	1356.36	450.8	2574.29	1252.67	516.84	423.55	464.88	887.63	832.73	1089.73
MAG342	841.78	177.63	615.32	754.81	236.33	818.67	0.4884	0.542412	d__Bacteria	p__Firmicutes_A	c__Clostridia	o__Lachnospirales	f__Lachnospiraceae	g__UBA3766	s__	889.19	1662.99	2027.6	338.57	1271.09	1330.93	427.73	341.77	178.1	948.51	213.49	471.42	718.48	1147.21	435.62	12.71	440.57	106.77	296.23	239.48	413.31	846.3	2995.77	1405.26
MAG343	1112.34	123.79	428.84	1844.64	293.06	1015.19	0.0647	0.0970075	d__Bacteria	p__Bacteroidota	c__Bacteroidia	o__Bacteroidales	f__P3	g__UBA1217	s__UBA1217 sp002371315	673.24	1059.7	544.38	1336.92	1177.34	960.32	1241.01	1936.19	947.78	1788.93	617.83	1064.45	2894.75	2598.07	2633.73	1149.06	3807.88	431.74	1093.44	1538.68	981.3	769.59	2117.69	2119.71
MAG344	232.27	82.59	286.11	1049.34	196.35	680.17	0.0032	0.00644001	d__Bacteria	p__Firmicutes_C	c__Negativicutes	o__Veillonellales	f__Megasphaeraceae	g__Megasphaera	s__Megasphaera elsdenii	338.5	60.04	754.65	290.91	89.34	857.04	64.78	51.7	5.65	99.64	66.52	108.43	1630.24	878.3	1148.74	585.53	1280.62	573.97	1428.3	648.95	1943.17	25.54	222.97	2225.7
MAG345	1761.23	128.21	444.14	1138.37	134.54	466.07	0.0047	0.00900475	d__Bacteria	p__Bacteroidota	c__Bacteroidia	o__Bacteroidales	f__UBA932	g__RC9	s__	1933.11	1517.91	1167.17	1354.74	2281.28	1309.33	1935.77	2636.43	1495.06	1648.27	1651.48	2204.15	1705.01	1145.29	2077.4	874.93	866.8	1155.89	820.94	561.22	871.01	979.42	822	1780.54
MAG346	3411.3	354.42	1227.74	2027.04	272.89	945.33	0.0079	0.0145442	d__Bacteria	p__Firmicutes_A	c__Clostridia	o__Lachnospirales	f__UBA1390	g__RUG760	s__RUG760 sp900322165	3694.15	1153.57	5579.72	3824.33	3963.88	5117.42	3581.08	3324.94	2012.14	3475.41	2689.84	2519.13	3081.49	2345.71	2379.26	1027.05	1850.38	2540.86	1439.38	819.64	1310.48	4160.12	1464.9	1905.25
MAG347	412.39	39.77	137.78	556.21	129.25	447.73	0.5637	0.607281	d__Bacteria	p__Bacteroidota	c__Bacteroidia	o__Bacteroidales	f__Bacteroidaceae	g__UBA1786	s__	363.27	757.79	288.46	378.74	488.51	237.54	392.23	281.03	392.9	392.61	534.84	440.73	583.29	684.75	344.45	427.47	263.5	156.6	1834.11	298.23	523.32	299.62	857.4	401.75
MAG348	5939.23	609.19	2110.29	1581.74	346.27	1199.52	<.0001	0.00051826	d__Bacteria	p__Bacteroidota	c__Bacteroidia	o__Bacteroidales	f__P3	g__UBA1711	s__UBA1711 sp900314925	3250.87	10281.5	2582.05	8597.48	6800.32	4632.04	5187.42	4940.53	6527.15	6351.54	6129.93	5989.93	1196.33	3029.07	4101.86	351.05	3037.46	738.05	729.11	510.76	595.31	1513.85	1722.91	1455.12
MAG349	3501.97	378.13	1309.9	1583.44	302.37	1047.46	0.0032	0.00644001	d__Bacteria	p__Firmicutes_A	c__Clostridia	o__Lachnospirales	f__Lachnospiraceae	g__	s__	3447.17	2223.19	5234.03	3309.11	2187.58	4942.05	1602.74	2092.45	3929.86	4083.07	3403.3	5569.06	760.2	1064.95	924.48	818.83	2347.49	2750.78	442.85	503.79	2244.04	2923.18	905.4	3315.29
MAG35	11184.3	1995.51	6912.65	8149.3	1008.75	3494.4	0.4189	0.48004	d__Bacteria	p__Bacteroidota	c__Bacteroidia	o__Bacteroidales	f__Bacteroidaceae	g__Prevotella	s__	11163.9	8752.5	9679.9	8794.26	12670.1	7091.14	30172.2	17771.3	5362.9	5865.15	10858.5	6030.27	6813.38	6595.92	9698.78	9106.23	9455.56	5959.68	9566.71	2401.54	2836.53	14713.2	8820.83	11823.2
MAG350	213.33	25.55	88.5	1651.85	522.59	1810.31	0.0002	0.000712745	d__Bacteria	p__Patescibacteria	c__Saccharimonadia	o__Saccharimonadales	f__Saccharimonadaceae	g__UBA2834	s__	211.95	373.3	273.31	123.67	239.33	244.59	146.85	290.86	59.64	289.28	141.17	166	2190.6	6286.67	919.28	635.39	762.06	418.79	612.82	3594.58	601.01	205.66	2870.85	724.49
MAG351	616.5	95.56	331.03	629	126.56	438.42	0.8174	0.840715	d__Bacteria	p__Spirochaetota	c__Spirochaetia	o__Treponematales	f__Treponemataceae	g__Treponema_D	s__Treponema_D sp002394685	498.52	288.15	307.44	685.7	465.63	890.35	1352.62	1002.83	237.84	408.56	569.02	691.31	294.8	1120.26	521.15	706.34	473.41	1734.77	247.49	647.82	263.49	844.9	422.12	271.41
MAG352	8519.32	2296.3	7954.62	1712.93	1262.12	4372.12	0.0008	0.00202795	d__Bacteria	p__Firmicutes_A	c__Clostridia	o__Oscillospirales	f__Butyricicoccaceae	g__UBA4644	s__	2083.38	10855.9	6321.22	667.56	7801.74	3174.48	9090.35	5961.93	9638.36	8279.95	31791.6	6565.43	128.16	164.19	603.55	35.3	129.02	109.95	70.17	40.09	60.34	15169.4	186.83	3858.2
MAG353	349.14	50.56	175.14	298.32	71.59	248	0.2987	0.361449	d__Bacteria	p__Spirochaetota	c__Spirochaetia	o__Treponematales	f__Treponemataceae	g__Treponema_D	s__Treponema_D sp002369025	446.63	580.25	188.33	164.06	498.99	141.08	503.81	446.08	204.67	267.87	165.8	582.05	130.28	868.14	245.37	114.29	452.46	200.55	81.01	289.41	45.16	643.42	156.41	353.31
MAG354	833.86	207.62	719.21	464.93	165.23	572.37	0.0433	0.067299	d__Bacteria	p__Planctomycetota	c__Planctomycetes	o__Pirellulales	f__Thermoguttaceae	g__RUG369	s__	2765.99	565.03	259.54	551.07	966.95	978.99	1437.69	1087.99	434.34	496.23	172.57	289.94	631.56	455.4	99.43	250.04	46	1908.33	454.9	68.89	142.25	1268.18	163.16	91.04
MAG355	651.56	193.83	671.43	903.37	152.45	528.11	0.0735	0.108351	d__Bacteria	p__Firmicutes_A	c__Clostridia	o__Lachnospirales	f__Lachnospiraceae	g__NK4A136	s__NK4A136 sp000421045	259.5	1025.8	2428.02	553.08	1413.82	537.49	286.63	290.4	191.11	359.67	220.71	252.46	2082.09	1318.13	556.12	439.34	883.5	825.33	808.29	544.72	596.12	234.66	954.31	1597.78
MAG356	236.38	56.82	196.82	643.16	114.58	396.93	0.0079	0.0145442	d__Bacteria	p__Firmicutes_A	c__Clostridia	o__Lachnospirales	f__Lachnospiraceae	g__Eubacterium_Q	s__	160.93	180.57	707.67	236.35	374.17	452.45	62.93	108.52	21.94	302.58	76.38	152.04	456.47	1293.14	670.36	653.31	795.54	525.59	540.67	141.85	287.67	91.62	943.92	1317.73
MAG357	627.27	153.02	530.08	572.97	134.19	464.84	0.954	0.958397	d__Bacteria	p__Firmicutes_A	c__Clostridia	o__Oscillospirales	f__Ruminococcaceae	g__Firm-04	s__	389.43	490.39	1094.17	1054.42	492.16	1600.27	194.06	195.58	79.42	1448.28	311.27	177.78	1892.67	288.54	339.53	804.54	368.87	374.91	303.16	179.99	810.72	305.3	540.46	666.91
MAG358	34.83	4.08	14.15	671.79	438.36	1518.52	0.0056	0.0105333	d__Bacteria	p__Firmicutes	c__Bacilli	o__RFN20	f__CAG-288	g__UBA6879	s__	26.88	56.99	16.86	17.13	40.56	31.83	30.83	39.68	61.37	26.68	25.67	43.48	27.71	595.7	7.95	108.03	5434.33	307.46	125.25	98.83	32.48	730.69	137.5	455.5
MAG359	176.13	15.26	52.87	515.37	263.62	913.2	0.4189	0.48004	d__Bacteria	p__Firmicutes_A	c__Clostridia	o__Oscillospirales	f__Oscillospiraceae	g__NK3B98	s__	129.56	166.02	227.41	271.45	157.91	262.75	145.17	105.06	144.79	182.4	134.04	187.03	37.39	3024.11	1592.14	43.13	33.97	34.69	12.43	290.1	720.77	68.66	243.51	83.59
MAG36	808.53	60.33	209	771.2	248.8	861.88	0.0327	0.0526515	d__Bacteria	p__Firmicutes_A	c__Clostridia	o__Oscillospirales	f__Acutalibacteraceae	g__Ruminococcus_E	s__	973.83	577.02	905.15	543.42	528.87	946.63	993.91	899.52	486.26	919.56	876.25	1051.91	392.04	485.34	403.69	3299.35	557.82	802.95	234.06	312.57	214.99	1437.34	436.76	677.47
MAG360	554.67	114.53	396.73	1671.56	326.98	1132.69	0.0012	0.0028435	d__Bacteria	p__Bacteroidota	c__Bacteroidia	o__Bacteroidales	f__Muribaculaceae	g__	s__	520.88	606.45	1017.59	555.54	366.63	263.24	407.1	314.92	317.13	1626.42	392.12	267.99	2394.68	2358.7	731.33	410.48	528.35	3970.14	1008.19	1092.06	697.86	3172.62	1931.72	1762.53
MAG361	1261.94	248.45	860.66	1824.93	315.23	1091.98	0.1489	0.193768	d__Bacteria	p__Firmicutes_A	c__Clostridia	o__Lachnospirales	f__Lachnospiraceae	g__NK4A136	s__NK4A136 sp900102065	1214.51	852.97	3065.54	725.52	1195.72	1565.21	521.86	1459.15	304.42	2722.28	443.67	1072.39	2778.21	3395.73	1279.3	880.1	1662.18	1176.3	945.92	864.82	914.42	1154.03	3338.66	3509.5
MAG362	399.88	25.32	87.7	43831	13657.7	47311.7	<.0001	0.000417244	d__Bacteria	p__Bacteroidota	c__Bacteroidia	o__Bacteroidales	f__Bacteroidaceae	g__Prevotella	s__Prevotella sp900319905	454.04	507.06	327.41	610.63	366.89	402.02	396.03	387.95	383.58	306.84	325.43	330.65	23592.4	22321.2	22354.3	128283	1137.72	41131.6	124342	61515.8	93150.2	461.93	7022.19	659.79
MAG363	83.53	9.71	33.64	344.66	63.65	220.5	<.0001	0.000417244	d__Bacteria	p__Spirochaetota	c__Spirochaetia	o__Treponematales	f__Treponemataceae	g__Treponema_D	s__Treponema_D sp003447785	58.2	105.39	87.03	84.24	147.64	60.09	117.92	103.86	33.43	60.32	42.54	101.7	128.15	506.54	189.2	655.63	145.05	376.89	411.01	814.01	326.95	158.29	161.5	262.67
MAG364	764.33	142.27	492.84	1107.53	219.82	761.47	0.106	0.146257	d__Bacteria	p__Firmicutes_A	c__Clostridia	o__Lachnospirales	f__Lachnospiraceae	g__Eubacterium_Q	s__Eubacterium_Q sp900321215	677.26	472.97	1961.88	462.81	481.04	780.22	810.68	702.57	200.99	943.29	1390.11	288.09	961.71	1172.53	867.05	1333.16	474.79	3317.17	1290.33	540.63	559.37	1000.49	572.94	1200.17
MAG365	3722.97	1147.42	3974.79	511.54	120.53	417.53	0.0003	0.000944584	d__Bacteria	p__Bacteroidota	c__Bacteroidia	o__Bacteroidales	f__Bacteroidaceae	g__UBA4372	s__UBA4372 sp002450165	14966.1	3499.59	2475.27	465.28	4215.48	2928.01	1509.59	724.52	1417.67	1980.22	3323.31	7170.6	232.29	244.03	223.53	751.81	687.27	1084.55	960.34	258.11	17.24	1257.4	108	313.91
MAG366	1038.13	139.27	482.46	909.48	115.51	400.14	0.4189	0.48004	d__Bacteria	p__Firmicutes_A	c__Clostridia	o__Lachnospirales	f__Lachnospiraceae	g__Eubacterium_Q	s__	872.69	572.53	1924.41	1099.62	600.18	1430.57	1615.61	1202.48	494.92	716.33	1417.53	510.74	1121.93	1160.67	1160.78	1505.88	535.22	1360.07	674.19	291.06	448.58	1014.43	493.42	1147.55
MAG367	2736.89	398.38	1380.02	617.07	149.77	518.82	<.0001	0.000480481	d__Bacteria	p__Bacteroidota	c__Bacteroidia	o__Bacteroidales	f__UBA932	g__RC9	s__	2036.46	6307.74	2117.34	972.68	1853.19	2602.08	2059.44	2259.66	4236.4	3207.95	2922.38	2267.41	570.03	460.94	1014.65	152.91	490.43	792.91	266.7	165.61	158.62	1819.94	260.23	1251.82
MAG368	2445.09	395.51	1370.08	624.97	139.63	483.7	0.0002	0.000847995	d__Bacteria	p__Firmicutes	c__Bacilli	o__Erysipelotrichales	f__Erysipelotrichaceae	g__UBA636	s__UBA636 sp900321955	1530.97	1567.35	2434.88	1333.48	3240.98	4223.03	901.59	1075.88	4728.18	2342.38	1574.64	4387.77	289.63	471.49	337.59	166.76	890.92	680.41	214.36	212.41	211.89	1228.21	1360.42	1435.54
MAG369	1627.95	101.18	350.49	452.9	123.89	429.17	<.0001	0.000417244	d__Bacteria	p__Firmicutes	c__Bacilli	o__Acholeplasmatales	f__Anaeroplasmataceae	g__Anaeroplasma	s__	1473.11	1975.06	1278.68	1721.01	2582.8	1581.49	1396.15	1555.51	1389.76	1460.29	1492.2	1629.37	86.45	241.2	307.59	82.12	928.96	611.12	142.7	645.57	57.64	1373.55	92.81	865.04
MAG37	150.61	6	20.78	2118.35	761.61	2638.3	0.0005	0.00147325	d__Bacteria	p__Bacteroidota	c__Bacteroidia	o__Bacteroidales	f__UBA932	g__RC9	s__RC9 sp900316045	172.85	191.47	146.19	180.96	155.12	144.23	131.06	126.85	141.1	145.02	143.46	129.05	356.21	540.67	1354.97	4546.09	703.25	504.54	2244.72	8889.9	4636.9	124.84	700.65	817.44
MAG370	301.29	121.56	421.09	805.06	162.2	561.86	0.0179	0.0307309	d__Bacteria	p__Firmicutes_A	c__Clostridia	o__Lachnospirales	f__Lachnospiraceae	g__Weimerbacter	s__	49.87	302.3	1576.63	344.48	302.36	152.92	41.98	359.69	21.42	191.26	32.99	239.63	288.75	527.37	1198.44	432.97	1006.93	1601.35	1621.51	138.76	243.15	176.13	1154.67	1270.68
MAG371	376.06	90.57	313.76	1191.53	149.36	517.41	0.0005	0.00147325	d__Bacteria	p__Firmicutes_A	c__Clostridia	o__Oscillospirales	f__Ruminococcaceae	g__Ruminococcus	s__Ruminococcus sp900315975	300.01	123.97	757.99	496.92	585.4	354.45	189.6	170.76	31.03	1095.47	69.81	337.33	841.25	1893.82	1593.43	1314.7	1102.75	1281.57	1222.49	665.17	993.68	172.79	2074.08	1142.61
MAG372	2780.76	239.75	830.52	1999.69	283.52	982.15	0.0377	0.0596048	d__Bacteria	p__Bacteroidota	c__Bacteroidia	o__Bacteroidales	f__Bacteroidaceae	g__UBA2918	s__	3277.83	4019.03	1219.98	3460.74	3353.87	1296.54	2572.9	2602.23	2791.52	2586.03	3278.17	2910.3	1861.06	2724.44	3105.34	944.29	2234.75	2520.95	839.56	1062.55	651.32	3294.46	1543.02	3214.55
MAG373	606.97	69.86	242	878.31	204.05	706.84	0.3556	0.422044	d__Bacteria	p__Bacteroidota	c__Bacteroidia	o__Bacteroidales	f__Bacteroidaceae	g__UBA4334	s__	482.38	742.64	461.72	670.81	605.53	298.97	691.45	1254.93	472.38	461.15	467.8	673.86	733.38	1229.9	1031.78	262.67	775.94	2697.96	619.33	227.57	107.38	898.58	466.77	1488.51
MAG374	2807.67	614.21	2127.68	836.06	320.52	1110.3	0.0012	0.0028435	d__Bacteria	p__Firmicutes_A	c__Clostridia_A	o__Christensenellales	f__CAG-138	g__UBA3857	s__	3693.58	3441.74	8844.82	1070.31	1297.62	1248.87	2980.57	1411.64	1868.74	1628.75	3031.51	3173.89	1644.31	1062.41	261.34	10.3	393	342.71	591.93	129.41	891.85	4037.16	120.73	547.56
MAG375	394.41	90.74	314.32	730.7	214.77	743.97	0.6033	0.640391	d__Bacteria	p__Firmicutes	c__Bacilli	o__RFN20	f__CAG-826	g__UBA3207	s__	339.1	888.72	137.04	81.9	273	297.44	180.64	621.23	1103.15	275.15	214.96	320.58	140.82	2273.49	179.49	161.1	539.32	843.27	613.5	141.93	17.32	1409.7	566.47	1881.97
MAG376	314.41	48.99	169.7	368.27	55.54	192.4	0.6033	0.640391	d__Bacteria	p__Desulfobacterota	c__Desulfovibrionia	o__Desulfovibrionales	f__Desulfovibrionaceae	g__Desulfovibrio	s__Desulfovibrio sp900319575	203.76	296.1	379.7	172.86	174.64	364.05	152.02	277.62	293.87	505.6	211.04	741.62	192.63	344.76	379.62	198.53	653.78	254.57	168.7	236.45	208.25	633.25	489.32	659.34
MAG377	63.96	12.96	44.91	721.91	706.72	2448.15	0.0018	0.00393711	d__Bacteria	p__Firmicutes_A	c__Clostridia	o__Oscillospirales	f__Acutalibacteraceae	g__UBA1213	s__	39.46	182.49	117.51	55.4	42.55	70.79	40.86	33.39	24.44	33.04	70.94	56.65	18.68	9.41	7.89	4.37	16.98	8495.72	7.34	6.83	7.43	39.05	10.41	38.77
MAG378	760.59	213.1	738.19	533.25	131.44	455.31	0.729	0.755259	d__Bacteria	p__Firmicutes_A	c__Clostridia	o__Lachnospirales	f__Lachnospiraceae	g__UBA3766	s__UBA3766 sp002369155	772.27	1259.22	2367.43	425.45	861.43	1848.04	104.26	190.49	53.75	811.21	149.77	283.71	1095.61	894.96	307.14	100.77	197.13	451.49	256.58	183.05	84.48	328.06	1302.81	1196.97
MAG379	2992.05	378.83	1312.3	922.72	136.41	472.56	0.0001	0.000557131	d__Bacteria	p__Bacteroidota	c__Bacteroidia	o__Bacteroidales	f__UBA932	g__RC9	s__RC9 sp900320965	4114.18	1384.4	2615.51	5884.73	2795.31	4399.32	1854.81	1605.45	2968.09	1967.89	3511.76	2803.15	1241.15	594.42	879.26	450.74	1271.65	888.47	688.78	398.17	575.37	1972.85	661.65	1450.14
MAG38	4044.35	399.6	1384.27	1566.72	236.55	819.44	0.0001	0.000557131	d__Bacteria	p__Firmicutes_A	c__Clostridia	o__Oscillospirales	f__Oscillospiraceae	g__CAG-110	s__CAG-110 sp900315595	3704.76	4008.9	7473.33	3787.61	2958.55	3920.26	2408.48	4687.64	4437.65	3221.82	5377.37	2545.86	2403.41	2691.44	1091.59	1278.74	3030.38	1110.85	550.36	394.4	1326.49	1962.14	1229.19	1731.61
MAG380	530.28	61.2	212.02	976.14	215.25	745.67	0.106	0.146257	d__Bacteria	p__Firmicutes	c__Bacilli	o__RF39	f__CAG-1000	g__	s__	556.55	799.03	459.33	512.7	914.52	513.14	306.33	530.54	261.42	412.87	292.12	804.75	525.59	1093.76	880.03	364.68	1683.53	1673.58	77	2714.8	296.35	925.04	493.24	986.09
MAG381	1067.07	425.35	1473.47	82.79	26.83	92.96	0.0032	0.00644001	d__Bacteria	p__Firmicutes_A	c__Clostridia	o__Oscillospirales	f__Acutalibacteraceae	g__Ruminococcus_E	s__Ruminococcus_E sp900315605	3106.38	80.5	96.86	627.02	78.79	2016.91	676.95	131.38	178.29	126.27	1008.69	4676.81	43.15	127.16	28.11	8.22	66.63	28.98	11.93	22.04	4.81	301.01	183.59	167.8
MAG382	489.44	72.43	250.9	202.87	50.63	175.4	0.0027	0.00546148	d__Bacteria	p__Spirochaetota	c__Spirochaetia	o__Treponematales	f__Treponemataceae	g__Treponema_D	s__Treponema_D sp002369025	664.5	830.01	263.03	246.91	679.83	183.35	690.34	617.6	293.25	349.08	221.2	834.2	87.48	594.03	171.15	71.74	308.06	134.8	48.29	186.66	32.21	471.4	94.24	234.41
MAG383	1861.32	274.27	950.11	499.44	85.44	295.98	<.0001	0.000417244	d__Bacteria	p__Firmicutes	c__Bacilli	o__RF39	f__CAG-611	g__UBA3789	s__	1584.39	2433.84	1060.37	958.87	1802.13	1242.32	1336.89	1441.26	3887.9	1096.16	2048.05	3443.67	397.12	517.37	424.56	102.6	887.56	698.84	112.8	323.98	150.84	950.83	679.73	747.04
MAG384	2968.22	565.51	1958.97	818.3	168.53	583.8	0.0002	0.000847995	d__Bacteria	p__Bacteroidota	c__Bacteroidia	o__Bacteroidales	f__UBA932	g__RC9	s__RC9 sp900320185	4008.29	1684.29	1131.72	1133.4	7909	2205.97	4678.84	3903.12	1612.86	3210.1	1599.33	2541.73	377.64	472.11	1288.75	364.43	2381.46	1085.15	473.07	387.48	419.78	841.2	753.23	975.32
MAG385	2007.2	125.04	433.16	864.11	94.09	325.94	<.0001	0.000417244	d__Bacteria	p__Bacteroidota	c__Bacteroidia	o__Bacteroidales	f__UBA932	g__RC9	s__	2502.11	1685.89	1387.39	1739.55	2764.7	1593.82	2322.48	1839.95	1757.68	1950.08	1969.06	2573.69	1158.29	1090.16	1089.93	481.49	573.58	1105.31	444.4	437.84	707.86	1054.05	840.7	1385.72
MAG386	1308.16	353.04	1222.97	433.53	106.63	369.37	0.0111	0.019934	d__Bacteria	p__Firmicutes_A	c__Clostridia	o__Lachnospirales	f__Lachnospiraceae	g__Agathobacter	s__Agathobacter ruminis	567.29	703.33	3605.37	555.29	963.12	3898.22	1302.93	603.12	247.24	719.61	1934.6	597.82	391.42	171.26	711.21	55.58	123.46	792.68	148.43	147.52	501.27	1289.57	229.21	640.77
MAG387	1184.09	203.23	704.01	140.01	39.25	135.96	0.0001	0.000617624	d__Bacteria	p__Spirochaetota	c__Spirochaetia	o__Treponematales	f__Treponemataceae	g__Treponema_D	s__	632.11	698.94	693.09	1536.59	2138.42	1549.78	2493.54	1721.67	117.51	1058.72	897.2	671.52	403.43	200.11	264.12	7.12	301.88	139.68	15.18	16.48	9.5	210.71	10.86	101.05
MAG388	1172.87	91.2	315.93	330.54	53.12	184.01	<.0001	0.000417244	d__Bacteria	p__Firmicutes_A	c__Clostridia	o__Oscillospirales	f__Oscillospiraceae	g__	s__	1031.49	1356.3	1474.47	702.36	1017.69	1576.66	1008.14	1032.08	1702.94	837.61	1395.82	938.86	440.68	433.36	244.51	77.96	310.79	368.01	203.69	100.46	240.3	704.06	273.7	568.98
MAG389	3480.44	531.92	1842.61	672.18	127.43	441.44	<.0001	0.000417244	d__Bacteria	p__Bacteroidota	c__Bacteroidia	o__Bacteroidales	f__Bacteroidaceae	g__Prevotella	s__	6074.87	2999.19	1877.1	6172.8	3535.64	7031.7	2136.21	2095.3	2514.17	2293.78	2634.84	2399.62	436.28	895.74	1167.6	203.04	1091.75	382.78	207.42	288.59	157.28	1350.88	745.37	1139.48
MAG39	6224.15	1390.89	4818.18	3551.06	819.92	2840.3	0.0833	0.119107	d__Bacteria	p__Bacteroidota	c__Bacteroidia	o__Bacteroidales	f__Bacteroidaceae	g__Prevotella	s__Prevotella sp900315775	6506.27	8660.96	1405.03	19080.3	9771.36	1983.48	3369.34	4691.76	3559.35	7200.01	2856.78	5605.07	2141.61	3814.5	4551.59	1588.97	9374.95	8559.54	805.16	1888.67	632.21	2015.61	4525.67	2714.28
MAG390	2461	318.41	1103	553.66	80.46	278.72	<.0001	0.000417244	d__Bacteria	p__Bacteroidota	c__Bacteroidia	o__Bacteroidales	f__UBA932	g__RC9	s__RC9 sp900320965	2400.72	1301.79	2469.5	4859.65	1945.75	4206.42	1868.02	1134.63	2908.7	1741.09	2587.17	2108.59	824.11	378.49	761.7	226.69	741.55	484.28	372	207.86	326.55	1064.49	422.88	833.33
MAG391	1176.8	194.09	672.36	158.71	65.48	226.84	<.0001	0.00051826	d__Bacteria	p__Firmicutes_A	c__Clostridia	o__Lachnospirales	f__Lachnospiraceae	g__	s__	1040.19	857.74	1508.87	435.41	810.27	1266.46	945.19	605.71	2235.58	531.45	2635.39	1249.31	53.43	182.93	166.95	15.54	105.15	18.89	36.35	4.66	9.43	512.57	75.75	722.87
MAG392	1388.9	264.34	915.7	301.84	89.75	310.89	0.0002	0.000712745	d__Bacteria	p__Firmicutes_A	c__Clostridia_A	o__Christensenellales	f__Christensenellaceae	g__QANA01	s__	668.85	1346.55	2473.18	822.88	915.5	3628.87	765.06	1000.02	1833.96	622.86	1852.51	736.6	425.81	290.52	220.13	78.34	112.04	253.9	183.37	77.72	131.33	599.38	94.51	1154.98
MAG393	2554.96	399.95	1385.48	589.03	131.53	455.63	0.0001	0.000617624	d__Bacteria	p__Firmicutes	c__Bacilli	o__Erysipelotrichales	f__Erysipelotrichaceae	g__UBA636	s__UBA636 sp900321955	1566.24	1687.26	2545.05	1465.03	3365.33	4482.89	1021.08	1088.87	4703.55	2454.56	1723.79	4555.81	270.45	435.72	339.77	159.2	828.82	660.66	190.52	197.44	190.45	1237.54	1225.71	1332.06
MAG394	1918.67	362.15	1254.53	519.1	177.69	615.53	0.001	0.00245132	d__Bacteria	p__Bacteroidota	c__Bacteroidia	o__Bacteroidales	f__Bacteroidaceae	g__Prevotella	s__Prevotella sp900313805	2197.67	4627.67	1721.83	817.19	2116.25	1572.22	2422.28	560.68	1218.51	3831.47	1435.21	503	285.85	456.32	836.04	129.21	658.13	295.57	141.74	150.65	129.08	2334.13	269.48	543.03
MAG395	1180.94	222.18	769.65	1314.34	479.12	1659.71	0.4189	0.48004	d__Bacteria	p__Firmicutes	c__Bacilli	o__Erysipelotrichales	f__Erysipelotrichaceae	g__UBA1783	s__	971.58	1160.45	2895.72	338.2	1033.56	155.55	1378.93	2162	423.44	1511.58	931.31	1208.92	1578.35	974.25	364.93	290.04	351.65	616.09	1287.8	151.97	354.23	4572.63	326.27	4903.81
MAG396	2287.77	191.85	664.6	1411.76	181.76	629.64	0.0032	0.00644001	d__Bacteria	p__Bacteroidota	c__Bacteroidia	o__Bacteroidales	f__UBA932	g__RC9	s__	1853.79	2502.18	1383.11	2545.73	2711.46	2030.86	2023.04	2091.4	1537.91	3145.82	3689.43	1938.55	1878.97	1514.29	1826.22	759.62	752.17	1041.75	994.2	639.39	1128.34	1937.63	1743.22	2725.33
MAG397	1292	212.91	737.55	139.45	51.74	179.24	<.0001	0.000417244	d__Bacteria	p__Firmicutes_A	c__Clostridia	o__Lachnospirales	f__UBA1390	g__	s__	1047.1	1323.09	1629.51	1031.35	842.03	2844.29	766.28	596.85	1724.09	623.95	2436.48	638.96	62.71	113.82	135.74	22.04	115.49	58.7	33.28	21.19	30.15	393.39	77.92	609.01
MAG398	3172.03	1140.24	3949.91	603.68	110.93	384.26	0.0015	0.00336637	d__Bacteria	p__Firmicutes_A	c__Clostridia	o__TANB77	f__CAG-508	g__CAG-269	s__	1711.01	577.26	846.38	1116.74	8674.59	935.94	1990.38	953.76	13126.7	2177.49	593.37	5360.82	424.67	643.76	970.34	229.02	1568.46	474.9	358.7	413.49	119.65	697.97	572.11	771.1
MAG399	1233.49	391.16	1355.03	73.33	17.65	61.15	<.0001	0.000417244	d__Archaea	p__Methanobacteriota	c__Methanobacteria	o__Methanobacteriales	f__Methanobacteriaceae	g__Methanobrevibacter_A	s__	605.93	827.05	1180.28	211.89	311.47	831.18	627.99	342.5	4131.54	784.59	933.83	4013.64	64.38	59.5	30.49	20.96	64.38	57.82	34.04	36.68	13.47	204.85	173.45	119.96
MAG4	2748.43	199.03	689.46	1734.89	218.12	755.6	0.0047	0.00900475	d__Bacteria	p__Bacteroidota	c__Bacteroidia	o__Bacteroidales	f__UBA932	g__RC9	s__	3051.7	2265.42	1798.4	2174.77	3561.15	2038.5	2995.77	4006.3	2380.21	2624.02	2522.78	3562.12	3035.93	1683.3	3101.61	1308.28	1275.89	1726.51	1245	852.63	1267.11	1476.73	1233.71	2611.95
MAG40	15474.5	2758.58	9556.01	30609.6	12473.7	43210.2	0.4189	0.48004	d__Bacteria	p__Bacteroidota	c__Bacteroidia	o__Bacteroidales	f__Bacteroidaceae	g__Prevotella	s__Prevotella sp900314755	19727.9	8636.77	3747.82	12202.9	9041.4	5089.71	17886.7	37195.8	13993.9	23261.8	10603	24306	13482.5	45882.8	10900.8	16693.4	161997	13746.7	3196.07	34327.1	6226.1	14911.1	14040.5	31910.6
MAG400	1380.53	164.73	570.64	365.14	65.62	227.32	<.0001	0.000417244	d__Bacteria	p__Firmicutes_A	c__Clostridia	o__Oscillospirales	f__Acutalibacteraceae	g__RUG612	s__RUG612 sp900320605	879.93	794.16	2105.9	946.74	1388.32	2594.71	1241.69	1271.37	1690.07	882.46	1845.84	925.19	629.16	410.64	499.35	47.89	216.42	311.02	177.01	126.8	176.72	737.36	390.97	658.39
MAG401	2589.52	691.1	2394.05	360.02	83.63	289.69	<.0001	0.000417244	d__Bacteria	p__Verrucomicrobiota	c__Kiritimatiellae	o__RFP12	f__UBA1067	g__UBA1067	s__	2462.58	9899.54	2497.81	1773.71	3365.86	1689.13	2355.42	1046.26	1526.93	1114.79	1472.68	1869.48	417.02	561.98	444.44	33.7	634.24	273.8	68.07	140.58	77.32	1036.86	254.56	377.69
MAG402	1607.69	466.79	1617	237.39	160.68	556.61	0.0005	0.00147325	d__Bacteria	p__Firmicutes_A	c__Clostridia	o__Lachnospirales	f__Lachnospiraceae	g__UBA3633	s__	2528.01	1864.7	1639.89	917.54	761.29	619.84	6375.39	405.24	1355.87	1205.58	845.58	773.34	48.76	70.18	61.33	5.7	643.24	17.89	4.73	3.12	0.61	1911.74	19.3	62.08
MAG403	997.07	178.53	618.44	419.57	49.04	169.89	0.0015	0.00336637	d__Bacteria	p__Bacteroidota	c__Bacteroidia	o__Bacteroidales	f__UBA932	g__RC9	s__	1191.11	874.33	322.63	814.1	2339.05	489.91	833.79	1387.45	490.93	686.08	585.94	1949.46	408.19	416.54	763.39	287.42	477.61	751.39	349.01	354.51	275.68	251.57	336.95	362.58
MAG404	1813.5	248.14	859.58	567.7	120.85	418.65	0.0003	0.000944584	d__Bacteria	p__Firmicutes_A	c__Clostridia	o__Lachnospirales	f__Lachnospiraceae	g__UBA6987	s__	1557.23	1800.48	3257.73	1334.09	1288.37	3508.87	2284.46	1485.01	1372.11	906.8	2201.66	765.21	1161.65	405.68	621.55	184.04	301.19	835.26	239.33	64.46	510.33	1350.23	195.54	943.14
MAG405	568.21	206.47	715.22	125.56	27.74	96.11	0.0012	0.0028435	d__Bacteria	p__Firmicutes_A	c__Clostridia	o__Oscillospirales	f__Ruminococcaceae	g__Firm-04	s__Firm-04 sp001603005	486.32	479.13	1130.33	377.97	384.46	2678.65	253.95	225.14	142.61	236.66	284.51	138.84	163.28	71.16	82.95	28.52	102.17	276.91	30.94	24.04	66.11	141.47	217.36	301.82
MAG406	1247.91	164.86	571.09	253.85	86.33	299.04	0.0001	0.000617624	d__Bacteria	p__Firmicutes_A	c__Clostridia	o__Oscillospirales	f__Acutalibacteraceae	g__Ruminococcus_E	s__Ruminococcus_E sp900317875	1161.53	901.74	973.89	709.94	423.59	1193.98	2146.13	750.92	1774.52	1477.71	2261.37	1199.6	110.64	437.86	98.52	10.09	377.5	103.36	36.42	59.14	7.39	922.78	172.76	709.75
MAG407	849.76	183.92	637.1	1242.83	230.73	799.29	0.106	0.146257	d__Bacteria	p__Bacteroidota	c__Bacteroidia	o__Bacteroidales	f__UBA932	g__RC9	s__RC9 sp900316675	566.21	1743.16	555.42	613.87	330.04	125.58	1300.26	1704.49	128.07	1889.14	550.93	689.96	1757.32	2753.67	2217.48	528.62	869.84	2240.25	815.6	712.5	256.7	776.17	761.38	1224.47
MAG408	4986.25	441.32	1528.78	786.16	113.62	393.6	<.0001	0.000417244	d__Bacteria	p__Bacteroidota	c__Bacteroidia	o__Bacteroidales	f__Bacteroidaceae	g__UBA4293	s__UBA4293 sp900316585	6276.45	6626.47	3226.29	6368.56	5452.67	3317.34	3725.08	4036.96	7791.17	3487.56	5328.05	4198.43	757.38	1187.84	1103.97	353.7	1060.41	502.24	393.75	467.32	242.81	1495.37	923.14	945.95
MAG409	1404.27	173.73	601.82	278.11	72.09	249.72	<.0001	0.00051826	d__Bacteria	p__Firmicutes_A	c__Clostridia	o__TANB77	f__CAG-508	g__	s__	823.36	2083.62	1588.74	652.54	1574.2	1680.22	735.83	840.97	2041.87	989.86	1369.26	2470.73	166.22	339.53	187.06	54.35	319.37	271.28	72.82	154.16	44.42	924.03	244.68	559.42
MAG41	19972.2	5642.73	19547	2632.46	1384.48	4795.97	0.0004	0.0012857	d__Bacteria	p__Firmicutes_A	c__Clostridia	o__Lachnospirales	f__Lachnospiraceae	g__CAG-603	s__CAG-603 sp900314525	14679.4	673.95	11013.5	6094.55	20027.7	45193.6	65726	22180.4	7469.49	35149.3	4532.66	6926.36	316.31	512.38	3191.08	485.77	16819.9	6078.77	647.91	471.2	228.68	2143.48	340.32	353.67
MAG410	2324.4	278.98	966.42	624.31	136.8	473.88	<.0001	0.00051826	d__Bacteria	p__Firmicutes_A	c__Clostridia	o__Peptostreptococcales	f__Anaerovoracaceae	g__UBA1764	s__	2055.71	1832.84	4581.03	1310.05	1526.31	3525.25	1940.39	1826.72	3024.19	1788.3	2776.45	1705.59	788.92	549.04	609.83	115.13	539.48	447.57	321.91	155.81	351.54	1750.69	545.27	1316.53
MAG411	1179.68	263.37	912.35	493.3	151.95	526.37	0.0153	0.0263569	d__Bacteria	p__Firmicutes	c__Bacilli	o__Acholeplasmatales	f__Anaeroplasmataceae	g__	s__	968.53	433.71	361.92	767.95	864.46	1331.09	1023.28	1666	3427.42	86.62	1016.13	2209.1	64.89	1600.76	360.24	185.41	318.9	1313.45	690.15	25.22	49.77	860.92	14.74	435.17
MAG412	1003.45	171.09	592.68	751.81	71.12	246.37	0.4189	0.48004	d__Bacteria	p__Bacteroidota	c__Bacteroidia	o__Bacteroidales	f__UBA932	g__RC9	s__	798.56	884.65	349.28	411.12	1715.88	357.7	839.32	1084.92	1079.44	1409.29	752.26	2358.97	702.58	594.37	1090.98	431.32	806.16	990.48	722.36	466.11	962.76	767.36	400.54	1086.73
MAG413	3188.37	278.59	965.06	725.72	157.47	545.5	<.0001	0.000417244	d__Bacteria	p__Bacteroidota	c__Bacteroidia	o__Bacteroidales	f__UBA932	g__RC9	s__	2807.44	4473.45	3007.42	2078.36	3913.92	5070.48	2427.9	3071.46	2770.44	1708.86	3517.67	3413.04	527.9	534.38	834.14	244.45	713.77	831.9	490.34	250.39	172.3	1527.23	558.15	2023.64
MAG414	1285.79	632.36	2190.55	585.07	274.45	950.72	1	1	d__Bacteria	p__Firmicutes_A	c__Clostridia	o__Oscillospirales	f__Ruminococcaceae	g__Ruminococcus	s__Ruminococcus sp003488415	171.1	5007.41	1745.11	138.23	6605.09	473.2	222.81	210.98	21.4	707.73	74.93	51.52	449.09	510.33	477.62	61.53	785.06	471.48	128.91	23.14	76.73	3515.4	277.38	244.15
MAG415	1273.24	512.44	1775.13	252.38	66.32	229.73	0.0282	0.0463872	d__Bacteria	p__Firmicutes_A	c__Clostridia	o__Oscillospirales	f__Ruminococcaceae	g__Ruminococcus_D	s__Ruminococcus_D albus_A	1390.84	1351.13	6533.84	2050.27	641.86	1331.94	125.96	196.85	51.53	1007.46	188.34	408.87	137	251.27	517.52	64.54	522.45	218.96	59.87	32.2	54.08	112.31	317.2	741.15
MAG416	1176.4	318.37	1102.86	485	185.99	644.3	0.0243	0.0406036	d__Bacteria	p__Firmicutes_A	c__Clostridia	o__Oscillospirales	f__Acutalibacteraceae	g__UBA737	s__UBA737 sp002371985	881.59	784.33	699	178.55	4262.96	1464.72	191.4	965.83	208.74	1462.08	1669.41	1348.23	72.49	360.49	483.4	244.08	395.9	50.66	233.96	100.02	138.23	2410.12	773.59	557.07
MAG417	1702.29	177	613.16	2559.71	532.81	1845.72	0.2987	0.361449	d__Bacteria	p__Firmicutes	c__Bacilli	o__RFN20	f__CAG-826	g__UBA733	s__UBA733 sp900316365	1098.72	2485.81	1067.78	1011.79	1842.88	1590.25	2108.4	2930.61	1605.93	1984.8	1007.44	1693.03	231.94	6649.15	1905.67	992.6	4220.99	2865.16	1187.03	1985.52	680.43	3793.69	2170.03	4034.28
MAG418	1997.97	472.75	1637.64	737.54	234.03	810.7	0.0067	0.0124489	d__Bacteria	p__Firmicutes_A	c__Clostridia	o__Lachnospirales	f__Lachnospiraceae	g__CAG-603	s__CAG-603 sp900315425	1983.58	522.11	977.52	2661.82	708.66	2841.01	490.95	1403.84	556.53	2520.5	6133.97	3175.09	429.28	369.62	503.65	405.99	843.58	1639.05	320.9	246.74	108.04	2961.32	235.26	787.05
MAG419	1843.72	223.74	775.06	3527.86	1563.75	5417	0.8625	0.880841	d__Bacteria	p__Bacteroidota	c__Bacteroidia	o__Bacteroidales	f__Bacteroidaceae	g__Prevotella	s__	1951.93	2036.48	864.48	2005.82	1641.01	1489.44	2044.86	4007.91	1559.11	1918.99	1373.9	1230.76	18896.3	4243.37	3194.67	150.31	1802.35	416.37	191.59	261.55	152.52	2106.75	2358.37	8560.21
MAG42	11013.5	1181.84	4094	3745.82	1098.5	3805.31	0.0012	0.0028435	d__Bacteria	p__Bacteroidota	c__Bacteroidia	o__Bacteroidales	f__P3	g__	s__	7133.61	13047.6	6217.39	15606.9	14336.6	8633.49	12448.6	11667.9	7129.71	18838.2	5958.46	11143.4	3012.33	11182.7	7827.91	721.12	9133.95	527.71	403.98	799.51	1005.19	2252.38	1983.23	6099.83
MAG420	3226.24	440.27	1525.16	419.11	137.39	475.94	<.0001	0.000417244	d__Bacteria	p__Firmicutes_A	c__Clostridia	o__Oscillospirales	f__Oscillospiraceae	g__	s__	2565.06	2365.97	5717.19	1883.55	2274.82	3306.9	2688.84	2666	6753.82	1898.92	3876.7	2717.15	237.51	339.95	435.86	76.31	346.33	178.45	183.25	107.58	216.29	1809.75	314.41	783.57
MAG421	1125.23	229.14	793.77	927.72	197.46	684.01	0.3865	0.45246	d__Bacteria	p__Firmicutes_A	c__Clostridia	o__Lachnospirales	f__Lachnospiraceae	g__Eubacterium_Q	s__Eubacterium_Q sp900316715	1309.28	535.95	1706.94	558.77	737.9	3364.25	1019.03	1232.27	424.13	798.36	984	831.88	612.51	2309.42	427.27	572.31	564.65	881.87	327.96	378.26	278.95	1216.04	1821.62	1741.76
MAG422	1305.41	179.16	620.62	124.4	52.44	181.66	<.0001	0.000417244	d__Bacteria	p__Spirochaetota	c__Spirochaetia	o__Treponematales	f__Treponemataceae	g__Treponema_D	s__	883.05	2166.56	938.18	1185.68	2273.95	1519.29	1616.48	1545.51	297.01	403.26	1712.36	1123.58	162.62	71.93	190.55	16.5	113.28	65.57	22.15	43.75	13.07	671.95	29.72	91.69
MAG423	2742.01	1208.14	4185.12	371.05	138.23	478.85	0.0003	0.00110952	d__Bacteria	p__Firmicutes_A	c__Clostridia	o__Lachnospirales	f__Lachnospiraceae	g__Eubacterium_Q	s__	1514.41	471.74	15897.5	2071.71	1106.4	1543.75	2190.98	871.52	1890.14	2630.85	1404.22	1310.86	115.56	234.7	885.25	115.06	655.06	104.69	65.11	27.34	67.88	1647.67	297.66	236.66
MAG424	1124.2	268.27	929.32	1322.02	246.37	853.44	0.3556	0.422044	d__Bacteria	p__Firmicutes_A	c__Clostridia	o__Lachnospirales	f__Lachnospiraceae	g__Eubacterium_Q	s__Eubacterium_Q sp002371025	999.91	323.01	3072.04	350.92	313.41	2391.51	1060.71	1297.41	232.72	2012.1	1065.19	371.5	769.54	1260.31	1298.65	1311.02	1325.26	802.34	679.18	235.36	616.45	1820.98	3248.66	2496.52
MAG425	2611.67	1499.55	5194.58	421.14	94.07	325.86	0.0047	0.00900475	d__Bacteria	p__Verrucomicrobiota	c__Kiritimatiellae	o__RFP12	f__UBA1067	g__UBA1067	s__	2210.53	18913.5	2529.93	989.68	2357.59	1150.19	445.75	465.32	388.7	483.08	616.27	789.46	417.33	555.71	358.4	39.79	1027.38	1027.18	93.15	245	199.09	573.99	231.14	285.52
MAG426	1191.61	159.26	551.71	316.05	56.02	194.07	<.0001	0.000417244	d__Bacteria	p__Firmicutes_A	c__Clostridia	o__Oscillospirales	f__Oscillospiraceae	g__UBA1774	s__	1506.33	2675.08	896.72	1147.54	1338.59	1125.26	1222.81	672.18	466.02	845.96	1110.17	1292.65	548.75	460.55	286.11	54.68	297.81	437.51	162.89	59.52	83.77	620.5	453.73	326.81
MAG427	3047.56	591.45	2048.83	372.48	123.73	428.6	0.0001	0.000617624	d__Bacteria	p__Firmicutes	c__Bacilli	o__Mycoplasmatales	f__Mycoplasmoidaceae	g__Malacoplasma_A	s__	5669.39	1865.07	1378.12	1336.22	2310.22	6701.83	841.39	3716.59	3303.97	448.15	5483.07	3516.68	169.52	82.34	91.8	58.69	1080.09	462.35	58.83	358.21	47.53	667.77	101.3	1291.36
MAG428	4027.79	483.87	1676.19	657.56	105.29	364.74	<.0001	0.000417244	d__Bacteria	p__Bacteroidota	c__Bacteroidia	o__Bacteroidales	f__UBA932	g__RC9	s__	5289.48	2250.85	1444.06	7482.21	4427.13	5151.62	3455.72	3946.62	2826.6	4112.16	2501.21	5445.87	617.74	366	1367.22	424.11	1079.38	539.64	193.65	189.51	520.58	937.74	690.66	964.54
MAG429	550.57	95.06	329.29	681	139	481.5	0.4884	0.542412	d__Bacteria	p__Firmicutes_A	c__Clostridia	o__Lachnospirales	f__Lachnospiraceae	g__XBD2001	s__	388.7	316.46	1233.63	375.41	755.03	832.55	337.29	805.25	154.24	839.72	296.5	272.05	403.85	84.76	757.22	609.1	761.16	417.3	599.46	1423.56	109.28	818.6	1720.84	466.88
MAG43	3707.29	685.5	2374.65	1163.12	275.81	955.42	0.0004	0.0012857	d__Bacteria	p__Bacteroidota	c__Bacteroidia	o__Bacteroidales	f__UBA932	g__RC9	s__RC9 sp900320185	5004.88	2164.14	1421.76	1392.18	9567.7	2698.44	5880.49	4927.71	2027.6	4081.94	2089.54	3231.11	507.25	673.78	1644.07	533.21	3894.66	1521.54	625.78	504.36	547.2	1162.01	1011.55	1332.02
MAG430	2512.26	294.39	1019.8	282.99	93.88	325.22	<.0001	0.000417244	d__Bacteria	p__Bacteroidota	c__Bacteroidia	o__Bacteroidales	f__UBA932	g__RC9	s__	2536.84	1863.71	1960.1	1314.9	2981.18	4240.28	1137.68	2270.74	2118.32	3227.24	4338.29	2157.84	121.72	117.93	221.29	138.59	492.24	109.23	119.83	81.22	106.09	1230.06	405.5	252.18
MAG431	1190.99	186.03	644.43	845.77	168.85	584.91	0.0941	0.13237	d__Bacteria	p__Spirochaetota	c__Spirochaetia	o__Treponematales	f__Treponemataceae	g__Treponema_D	s__Treponema_D sp002394685	980.94	476.4	601.95	1489.86	985.1	1742.12	2517.38	1819.56	368.25	637.03	1177.84	1495.39	361.88	1480.52	781.96	944.19	634.81	2313.44	323.68	776.14	395.35	1196.31	591.08	349.91
MAG432	6591.22	548.2	1899.03	2878.34	681.59	2361.08	0.0008	0.00202795	d__Bacteria	p__Bacteroidota	c__Bacteroidia	o__Bacteroidales	f__Bacteroidaceae	g__Prevotella	s__	8183.93	9157.79	3339.41	7598.13	5917.7	6250.28	6761.71	5923.31	5293.87	4787.95	10101	5779.53	2308.61	3730.98	3916.7	491.11	4597.78	1707.34	692.61	1132.53	393.49	8502.33	2376.07	4690.54
MAG44	114.71	17.46	60.47	1229.79	1153.65	3996.36	0.1489	0.193768	d__Bacteria	p__Firmicutes_A	c__Clostridia	o__Oscillospirales	f__Acutalibacteraceae	g__UBA1213	s__	91.27	208.45	233.69	114.44	86.76	136.56	77.26	54.47	45.56	79.74	170.3	77.98	164.6	25.45	22.47	3.87	106.64	13915.4	21.95	5.79	3.77	104.86	9.94	372.75
MAG45	1752.67	142.82	494.73	990.31	337.57	1169.39	0.0007	0.00172365	d__Bacteria	p__Bacteroidota	c__Bacteroidia	o__Bacteroidales	f__UBA932	g__RC9	s__	2177.68	2953.91	1145.17	1190.46	1967.71	1899.72	1470.64	1527.79	1688.63	1346.88	1878.22	1785.18	607.24	711.67	690.22	708.32	644.21	4626.4	467.5	316.18	350.66	1182.61	627.29	951.46
MAG46	114.36	23.64	81.91	36035.3	6773.36	23463.6	0.0003	0.000944584	d__Bacteria	p__Bacteroidota	c__Bacteroidia	o__Bacteroidales	f__P3	g__Phil12	s__Phil12 sp900314725	167.06	82.42	320.06	113.18	55.1	215.89	97.26	67.07	44.24	87.14	67.8	55.09	40018.2	40095.5	23540.1	17402.9	64.51	34871.3	43583.3	27503.9	14224	92265.8	42390.8	56463.3
MAG47	4762.13	287.69	996.59	9251.39	3543.19	12274	0.7728	0.798714	d__Bacteria	p__Bacteroidota	c__Bacteroidia	o__Bacteroidales	f__Bacteroidaceae	g__Prevotella	s__Prevotella sp900314655	5764.92	5519.62	2890.34	6624.78	4584.39	5302.42	4214.77	3929.77	5391.68	4459.48	4286.66	4176.75	3255.81	3462.65	3398.04	2359.61	5114.9	45256.8	3105.68	10588.4	19127	4539.95	6737.3	4070.64
MAG48	554.26	72.28	250.39	1802.1	427.98	1482.57	0.0002	0.000847995	d__Bacteria	p__Bacteroidota	c__Bacteroidia	o__Bacteroidales	f__UBA932	g__RC9	s__RC9 sp900320385	522.48	807.44	280.81	232.24	545.84	420.75	399.74	1166.54	491.32	650.91	477.63	655.45	1154.58	1251.77	646.45	1938.44	738.18	6114.11	1165.47	1180.09	1936.22	1482.57	1178.27	2839.02
MAG49	6387.26	670.1	2321.3	6558.87	1636.25	5668.12	0.6861	0.714212	d__Bacteria	p__Bacteroidota	c__Bacteroidia	o__Bacteroidales	f__Bacteroidaceae	g__Prevotella	s__	7567.56	10820	3121.78	10442.9	6420.14	3716.9	6593.15	5526.05	5795.05	5742.64	6034.45	4866.53	3994.29	6015.51	11004.3	914.7	6957.25	13043.4	1174.15	1878.54	730.31	9136.28	4734.56	19123.2
MAG5	3728.03	736.64	2551.81	3105	660.36	2287.54	0.6861	0.714212	d__Bacteria	p__Bacteroidota	c__Bacteroidia	o__Bacteroidales	f__Bacteroidaceae	g__UBA3839	s__UBA3839 sp900321835	5127.98	6404.53	6218.24	2933.71	2477.82	1867.38	931.6	2253.23	1289.4	9476.66	3205.14	2550.63	7051.81	4793.75	6846.78	606.02	3154.25	412.91	1325.34	1982.39	565.3	3918.88	3400.45	3202.13
MAG50	3588.23	387.37	1341.89	2512.7	878.88	3044.53	0.0327	0.0526515	d__Bacteria	p__Firmicutes_A	c__Clostridia	o__Oscillospirales	f__Oscillospiraceae	g__CAG-110	s__	3119.84	5847.46	5184.44	1579.77	4568.78	3063.24	3604.17	3773.09	2147.27	3061.05	5016.7	2092.95	3602.54	2255.92	967.21	728.4	628.74	11204.9	886.8	287.94	628.51	3280.87	1411.41	4269.1
MAG51	298.05	115.01	398.41	1348.7	460.68	1595.86	0.0094	0.0169452	d__Bacteria	p__Firmicutes_A	c__Clostridia	o__Lachnospirales	f__Lachnospiraceae	g__CAG-411	s__	80.73	157.72	1499.1	433.95	105.77	287.94	250.16	389.29	128.29	94.49	61.42	87.76	1061.94	556.73	1278.92	2241.51	348.63	5786.32	410.91	1405.07	162.9	60.57	474.39	2396.52
MAG52	2964.14	178.5	618.35	1990.19	392.73	1360.47	0.0012	0.0028435	d__Bacteria	p__Bacteroidota	c__Bacteroidia	o__Bacteroidales	f__UBA932	g__RC9	s__RC9 sp900319855	3545.61	4172.77	1906.6	2269.27	3335.77	3095.62	3230.05	2388.69	2606.03	2732.84	3106.23	3180.18	1198.1	1341.63	2456.77	1767.16	1380.09	6124.34	1652.54	1090.57	1897.66	1299.84	2086.93	1586.62
MAG53	2918.63	518.12	1794.83	2544.69	520.35	1802.53	0.4529	0.510866	d__Bacteria	p__Bacteroidota	c__Bacteroidia	o__Bacteroidales	f__Bacteroidaceae	g__UBA1179	s__UBA1179 sp900318995	2260.95	7769.35	1378.65	1269.77	3392.91	1317.18	3490.13	3572.64	2469.7	2428.75	1744.83	3928.65	1332.43	4424.73	1600.39	893.44	1840.8	7251.66	1332.74	2913.06	930.16	2320.85	2951.97	2744.06
MAG54	3507.01	645.06	2234.55	1171.19	240.82	834.24	0.0008	0.00202795	d__Bacteria	p__Bacteroidota	c__Bacteroidia	o__Bacteroidales	f__UBA932	g__RC9	s__RC9 sp900320185	4713.46	2037.03	1362.51	1378.72	8981.92	2603.71	5616.21	4750.4	1983.57	3832.54	1878.04	2946.03	540.26	708.93	1548.62	634.2	3206.42	2325.42	635.42	524.54	561.53	1094.79	973.55	1300.57
MAG55	856.65	245.61	850.81	4675.28	1011.35	3503.43	0.0022	0.00459767	d__Bacteria	p__Firmicutes_A	c__Clostridia	o__Lachnospirales	f__Lachnospiraceae	g__UBA9722	s__UBA9722 sp900315015	238.83	725.28	2066.17	2711.06	1678.62	277.95	239.48	440.25	118.52	847.91	114.37	821.36	7825.94	4396.38	1785.89	9890.03	1635.68	3187.44	8802.35	9436.44	5496.73	228.47	1343.51	2074.48
MAG56	944.5	96.22	333.33	2623.53	825.55	2859.81	0.0056	0.0105333	d__Bacteria	p__Bacteroidota	c__Bacteroidia	o__Bacteroidales	f__UBA932	g__RC9	s__	918.31	1751.8	718.21	492.49	849.35	1021.21	721.89	1122.73	1048.92	673.14	1258.35	757.55	10910.9	2703.69	904.62	774.86	2292.8	1214.8	5048.95	1826.94	886.77	1200.78	1656.47	2060.76
MAG57	575.67	102.59	355.37	1378.25	536.91	1859.9	0.0735	0.108351	d__Bacteria	p__Firmicutes_A	c__Clostridia	o__Lachnospirales	f__Lachnospiraceae	g__XBD2001	s__	410.67	353.29	1178.89	435.91	663.28	893.66	304.44	702.25	195.59	1213.67	311.54	244.85	437	282.23	866.94	1287.54	1251.74	466.95	778.76	7016.58	316.43	876.42	2284.9	673.56
MAG58	77.69	13.44	46.57	1172.91	463.66	1606.17	0.0001	0.000557131	d__Bacteria	p__Firmicutes_C	c__Negativicutes	o__Acidaminococcales	f__Acidaminococcaceae	g__Acidaminococcus	s__Acidaminococcus fermentans	65.13	56.03	220.25	71.09	47.46	90.9	56.57	65.69	83.63	62.02	60.47	53.04	312.56	148.04	473.76	481.41	312.8	320.46	940.9	4665.96	4388.12	67.78	1346.41	616.67
MAG59	298.43	79.96	276.99	3744.71	1755.36	6080.76	0.013	0.0230917	d__Bacteria	p__Cyanobacteria	c__Vampirovibrionia	o__Gastranaerophilales	f__Gastranaerophilaceae	g__Zag111	s__	149.43	1043.93	428.49	187.53	398.56	72.94	167.02	156.75	18.07	464.96	130.78	362.68	3057.57	594.98	903.54	5183.4	290.64	8552.27	3754.94	21202.2	358.11	62.06	213.52	763.27
MAG6	5506.2	737.57	2555.02	2607.97	558.24	1933.8	0.0018	0.00393711	d__Bacteria	p__Firmicutes_A	c__Clostridia	o__Oscillospirales	f__Oscillospiraceae	g__CAG-110	s__CAG-110 sp900315595	4725.15	4715.35	12938	5945.93	4385.73	4232.86	3611.42	5710.68	4155.9	5014.07	7123.17	3516.14	7475.74	2789.62	2068.93	4073.7	1337.45	1393.65	988.47	535.75	4475.86	1678.8	1827.92	2649.75
MAG60	837.73	126.74	439.05	7300.17	2854.2	9887.25	0.4529	0.510866	d__Bacteria	p__Firmicutes_C	c__Negativicutes	o__Acidaminococcales	f__Acidaminococcaceae	g__Succiniclasticum	s__Succiniclasticum sp900315805	717.63	544.04	1980.04	639.34	580.66	1276.53	626.7	826.04	1104.97	506.18	849.62	400.99	692.88	431.72	329.99	14585.2	334.02	4074.91	21572.2	15695.4	27774.1	829.28	582.77	699.53
MAG61	217.6	59.93	207.59	896.49	350.48	1214.09	0.013	0.0230917	d__Bacteria	p__Cyanobacteria	c__Vampirovibrionia	o__Gastranaerophilales	f__Gastranaerophilaceae	g__UBA1221	s__	154.13	826.39	178.74	162.68	290.89	41.36	69.41	104.63	213.39	229.97	72.4	267.24	1920.75	681.96	395.46	910.48	77.31	675.02	607.56	4417.13	482.77	75.2	201.59	312.67
MAG62	38.23	15.69	54.35	1320.61	469.68	1627.02	0.0056	0.0105333	d__Bacteria	p__Firmicutes	c__Bacilli	o__Erysipelotrichales	f__Erysipelotrichaceae	g__Bulleidia	s__Bulleidia massiliensis	15.88	15.85	201.49	30.87	16.47	77.17	13.56	14.73	20.97	14.22	18.09	19.46	209.52	253.01	194.55	2543.16	8.65	1183.9	3179.85	5028.63	2465.85	16.07	743.23	20.88
MAG63	3742.29	848.7	2939.99	7065.27	1899.63	6580.53	0.1333	0.177222	d__Bacteria	p__Firmicutes_A	c__Clostridia	o__Oscillospirales	f__Ruminococcaceae	g__Ruminococcus_D	s__	5011.59	4673.38	12058.8	1909.56	2349.03	5327	1760.44	3245.36	1431.35	2811.58	2529.52	1799.88	23278.2	5921.66	5138.26	15282.8	3914.02	1370.56	4018.77	4818.46	1551.49	2856.83	4254.27	12377.8
MAG64	944.89	252.89	876.03	5719.33	1044.41	3617.93	0.0003	0.00110952	d__Bacteria	p__Firmicutes_A	c__Clostridia	o__Lachnospirales	f__Lachnospiraceae	g__UBA629	s__UBA629 sp900317915	789	110.91	1104.66	138.05	1706.86	424.45	1114.96	2296.57	63.8	2635.92	113.58	839.9	720	11522.1	6163.05	8530.26	3645.58	3733.59	6092.93	4436.64	2024.37	12136.6	2498.74	7128.04
MAG65	579.67	213	737.86	1100.97	532.47	1844.52	0.4529	0.510866	d__Bacteria	p__Fibrobacterota	c__Fibrobacteria	o__Fibrobacterales	f__Fibrobacteraceae	g__Fibrobacter_A	s__Fibrobacter_A sp002390045	307.5	2685.17	623.17	576.74	1249.78	439.68	111.35	364.4	87.14	165.74	180.96	164.43	402.79	559.85	531.09	270.6	3023.67	427.52	295.48	6418.12	592.87	105.18	317.23	267.19
MAG66	601.3	62.12	215.17	10194.2	2239.01	7756.16	<.0001	0.000417244	d__Bacteria	p__Bacteroidota	c__Bacteroidia	o__Bacteroidales	f__Bacteroidaceae	g__Prevotella	s__Prevotella sp002481295	673.2	989.45	435.39	1067.6	573.84	389.59	517.28	607.17	531.23	427.37	522.26	481.18	12644.5	20167.2	6576.39	19092.7	6096.28	3840.89	25446.3	9723.19	10782.9	1388.67	2708.2	3863.89
MAG67	2448.63	265.69	920.36	2218.73	381.43	1321.3	0.5254	0.577509	d__Bacteria	p__Bacteroidota	c__Bacteroidia	o__Bacteroidales	f__Bacteroidaceae	g__UBA4334	s__UBA4334 sp900316975	3059.42	3299.13	1288.12	3038.89	2061.89	1658.15	1442.96	3468.88	1775.56	2663.34	1602.41	4024.77	4048.85	3068.77	2002.19	1643.84	4126.69	385.85	1938.77	4248.54	1435.31	1302.6	1405.7	1017.66
MAG68	1496	171.63	594.53	3023.65	462.02	1600.49	0.0079	0.0145442	d__Bacteria	p__Bacteroidota	c__Bacteroidia	o__Bacteroidales	f__P3	g__UBA1217	s__UBA1217 sp002371315	865.27	1606.44	697.62	1707.21	1443.88	1208.44	1638.95	2818.22	1338.45	2269.46	936.17	1421.94	4847.85	4040.28	4151.76	1971.37	6074.18	734.18	1783.58	2869.79	1675.71	1249.4	3516.01	3369.68
MAG69	4158.29	1069.09	3703.43	11195.7	2571.39	8907.56	0.0094	0.0169452	d__Bacteria	p__Firmicutes_A	c__Clostridia	o__Lachnospirales	f__Lachnospiraceae	g__	s__	1568.42	354.95	4527.81	854.25	1697.27	4905.43	8169.46	4082.19	3260.21	13839.3	3308.77	3331.4	3916.8	5340.28	8990.42	7452.44	1939.11	3734.65	9134.57	23122	7087.74	11327.8	23451.2	28851.3
MAG7	2784.78	490.5	1699.15	1916.01	338.64	1173.08	0.1842	0.234054	d__Bacteria	p__Bacteroidota	c__Bacteroidia	o__Bacteroidales	f__UBA932	g__RC9	s__RC9 sp900318565	6310.9	4579.06	1441.29	1056.7	2627.55	810.98	3487.23	4610.12	1274.46	1734.98	3043.27	2440.83	4448.41	2835.31	2073.51	923.57	1737.86	1349.23	852.6	793.75	889.58	2064.28	1430.3	3593.68
MAG70	2275.52	472.8	1637.83	4082.45	322.07	1115.67	0.0047	0.00900475	d__Bacteria	p__Bacteroidota	c__Bacteroidia	o__Bacteroidales	f__Bacteroidaceae	g__UBA6382	s__UBA6382 sp002372095	1185.07	3311.87	1422.81	2706.27	2848.13	890.54	1073.22	2643.74	584.46	2796.13	1280.83	6563.2	4213.48	6032.61	3974.97	5172.77	4655.8	3236.96	3718.99	4607.97	2484.01	2158.07	3734.69	4999.11
MAG71	7158.43	3571.22	12371.1	683.86	217.7	754.14	<.0001	0.00051826	d__Bacteria	p__Bacteroidota	c__Bacteroidia	o__Bacteroidales	f__Muribaculaceae	g__C941	s__	2309.77	2554.51	46095.6	3293.13	3482.53	5979.62	3164.67	2372.62	5983.65	2857.6	6444.28	1363.19	227.93	723.75	692.2	149.32	895.03	392.06	284.98	159.44	262.13	2846.72	386.34	1186.42
MAG72	4970.74	588.03	2037	1399.34	199.19	690.02	<.0001	0.000417244	d__Bacteria	p__Firmicutes_A	c__Clostridia	o__Oscillospirales	f__Oscillospiraceae	g__CAG-110	s__CAG-110 sp900315595	5285.25	4614.46	9829.55	6751.46	3131.59	4910.19	2753.59	4377.48	4803.99	3464.2	6821.13	2906.03	2854.11	2039.94	1205.98	1607.07	1127.76	916.83	542.68	319.36	1789.63	1606.3	1053.52	1728.89
MAG73	12188.5	9303.38	32227.8	251.18	92.82	321.54	<.0001	0.00051826	d__Bacteria	p__Firmicutes_A	c__Clostridia	o__Lachnospirales	f__Lachnospiraceae	g__CAG-603	s__CAG-603 sp900321855	2518.05	996.52	3042.78	113824	1636.31	3508.85	2929.26	1247.61	613.73	14440.8	641.89	861.74	172.59	154.95	402.31	63.06	1207.98	183.68	55.87	64.82	49.11	331.02	99.41	229.4
MAG74	3998.27	531.19	1840.1	1027.59	139.25	482.37	<.0001	0.000417244	d__Bacteria	p__Bacteroidota	c__Bacteroidia	o__Bacteroidales	f__UBA932	g__RC9	s__RC9 sp900320965	4265.7	2263.58	3675.6	8593.74	3324.04	6252.49	2814.34	2035.24	4436.96	2731.1	4159.97	3426.48	1427	732.1	1267.19	457.15	1336.59	1054.08	700.18	420.51	637.38	1948.34	778.94	1571.64
MAG75	4476.12	468.8	1623.96	1496.54	218.03	755.29	<.0001	0.000417244	d__Bacteria	p__Firmicutes_A	c__Clostridia	o__Oscillospirales	f__Oscillospiraceae	g__CAG-110	s__CAG-110 sp900315595	3751.73	3931.07	8370.28	4079.5	4450.37	3792.73	2407.41	5649.49	4860.92	3438.82	6151.55	2829.6	3119.52	2098.2	1183.98	1595.97	1135.18	1016.3	590.04	336.72	1810.12	2110.07	1191.21	1771.15
MAG76	6103.96	1418.54	4913.96	657.03	135.19	468.3	<.0001	0.000417244	d__Bacteria	p__Bacteroidota	c__Bacteroidia	o__Bacteroidales	f__P3	g__UBA1711	s__	1980.51	3462.65	1610.63	2661.59	15933.1	2436	5245.5	5081.82	11915.2	2592.27	7108.14	13220	527.27	1118.23	1113.87	143.75	1019.59	335.29	185.89	157.06	201.77	1261.94	520.83	1298.92
MAG77	9307.72	1281.98	4440.89	38065.6	9103.14	31534.2	0.0001	0.000557131	d__Bacteria	p__Bacteroidota	c__Bacteroidia	o__Bacteroidales	f__Bacteroidaceae	g__Prevotella	s__	9717.09	7993.11	5802.31	16819.2	5507.62	5728.85	16532.3	14303.4	5783.67	11665.2	5212.49	6627.47	37187.7	18575.1	18802.5	74816.9	28279.4	13880.4	65321.7	27705.1	16839.2	15355.3	116368	23656.1
MAG78	318.2	19.07	66.06	15627.7	3694.23	12797.2	<.0001	0.00051826	d__Bacteria	p__Bacteroidota	c__Bacteroidia	o__Bacteroidales	f__Bacteroidaceae	g__Prevotella	s__Prevotella sp900315835	360.83	412.83	261.14	458.2	266.3	315.59	330.43	316.13	315.68	255.13	290.05	236.1	12935.9	26064.9	22636.7	29395	2164.93	5448.47	10441	16698	15164.1	319.16	42962.5	3301.61
MAG79	45.04	7.87	27.26	691.98	582.71	2018.58	0.0094	0.0169452	d__Bacteria	p__Firmicutes_A	c__Clostridia	o__Lachnospirales	f__Lachnospiraceae	g__TF01-11	s__	35.94	58.4	113.41	44.63	44.56	77.62	26.95	29.28	16.23	41.88	28.8	22.77	66.05	67.72	56.73	184.45	31.01	52.29	366.43	195.72	7094.47	32.87	81.24	74.83
MAG8	10910.7	1352.02	4683.53	9269.72	1105.85	3830.76	0.729	0.755259	d__Bacteria	p__Bacteroidota	c__Bacteroidia	o__Bacteroidales	f__Bacteroidaceae	g__Prevotella	s__	13023.1	9500.54	7281.06	9765.66	12349.2	7791.31	22565.2	16265.7	5887.5	7841.76	10811.4	7846.17	11695	7783.21	14143.5	8301.36	8563.41	9632.4	10458.3	2491.48	3247.63	15672.6	8371.24	10876.5
MAG80	11333.3	1760.99	6100.25	28569.5	3345.61	11589.5	0.0004	0.0012857	d__Bacteria	p__Bacteroidota	c__Bacteroidia	o__Bacteroidales	f__Bacteroidaceae	g__Prevotella	s__	12190	11352.5	3254.07	14994.4	11160.1	4640.76	23914	20651.1	7226.33	9726.5	9837.61	7052.01	44362	36192.9	29464	14731.6	24650.9	34587.6	11652	28365.6	47209.4	13328.5	34597.9	23692.1
MAG81	16858.6	2475.14	8574.15	29073	7529.96	26084.5	0.2482	0.308127	d__Bacteria	p__Bacteroidota	c__Bacteroidia	o__Bacteroidales	f__Bacteroidaceae	g__Prevotella	s__Prevotella sp900314755	21239.3	11515	4506.12	15511.6	11154.1	6620.11	19033.8	35434.1	16575.2	23506.3	12729.5	24478.6	28496.5	14721.6	12112	30813.4	33316.8	101806	20548.2	12502	53576	17160.2	11268.4	12555.7
MAG82	2100.27	1040.95	3605.96	328.57	55.12	190.95	0.0001	0.000617624	d__Bacteria	p__Bacteroidota	c__Bacteroidia	o__Bacteroidales	f__Muribaculaceae	g__C941	s__	795.44	874.9	1473.03	926.65	801.96	13205.4	666.27	568.67	750.04	3769.89	812.37	558.59	161.14	381.34	382.6	137.74	466.26	221.74	298.85	172.68	198.66	804.9	236.38	480.54
MAG83	2077.07	251.13	869.93	529.04	309.97	1073.75	0.0005	0.00147325	d__Bacteria	p__Bacteroidota	c__Bacteroidia	o__Bacteroidales	f__Muribaculaceae	g__C941	s__	3579.7	2728.5	3318.99	1589.81	1433.74	2078.6	1077.36	1570.12	2388.58	892.46	2719	1548.02	97.39	219.97	375.35	45.2	558.84	57.1	166.68	57.2	82.81	3870.63	116.28	700.99
MAG84	3387.83	1875.74	6497.76	1334.22	1065.1	3689.62	0.0005	0.00147325	d__Bacteria	p__Bacteroidota	c__Bacteroidia	o__Bacteroidales	f__UBA932	g__RC9	s__RC9 sp002371115	2528.88	2111.11	903.53	1566.18	1217.35	1106.43	1055.62	1324.74	23943.8	764.9	2199.22	1932.14	277.62	286.77	298.61	103.98	451.88	181.22	139.82	113.18	113.98	13034	212.92	796.58
MAG85	11937.1	2120.09	7344.21	2976.23	1179.47	4085.79	0.0007	0.00172365	d__Bacteria	p__Bacteroidota	c__Bacteroidia	o__Bacteroidales	f__Paludibacteraceae	g__RF16	s__RF16 sp900320865	18310.9	17528.5	5185.88	20131.2	22240.5	1324.35	3784.31	6930.49	9137.3	8481.47	9680.22	20510.5	779.69	2956.51	1745.68	982.36	3676.04	1051.95	1268.14	927.04	227.32	15358.1	4013.59	2728.34
MAG86	4478.94	473.36	1639.78	1816.08	330.42	1144.62	0.0004	0.0012857	d__Bacteria	p__Firmicutes_A	c__Clostridia	o__Oscillospirales	f__Oscillospiraceae	g__CAG-110	s__CAG-110 sp900315595	3094.02	3786.97	7410.9	3274.2	3731.64	3786.51	2461.57	6694.29	6054.05	3869.66	6218.21	3365.3	2583.5	2745.18	1240.05	1259.01	1243.5	1281.36	747.73	396.17	1572.13	4649.37	1612.64	2462.33
MAG87	1092.05	423.16	1465.87	990.2	858.66	2974.48	0.0015	0.00336637	d__Bacteria	p__Firmicutes_A	c__Clostridia_A	o__Christensenellales	f__CAG-138	g__UBA3857	s__	575.64	5534.06	1587.02	238.07	674.14	478.19	491.78	387.5	932.2	300.81	1484.23	420.9	178.05	125.55	76.02	18.61	70.96	416.55	86.5	24.95	82.49	10427.5	48.41	326.88
MAG88	1006.48	176.55	611.59	2766.29	760.96	2636.03	0.0153	0.0263569	d__Bacteria	p__Bacteroidota	c__Bacteroidia	o__Bacteroidales	f__P3	g__UBA1217	s__	507	931.05	535.72	619.3	685.1	588.77	1166.64	1472.03	663.37	2414.17	633.97	1860.62	3313.61	2687.83	878.76	601.21	1800.05	1045.69	1223.16	1220.16	935.41	7180.75	8744.29	3564.58
MAG89	2623.31	1333.56	4619.58	54114.4	9252.97	32053.2	0.0001	0.000557131	d__Bacteria	p__Firmicutes_C	c__Negativicutes	o__Selenomonadales	f__Selenomonadaceae	g__Selenomonas_C	s__Selenomonas_C bovis	981.77	612.22	1615.39	784.07	563.86	830.6	1099.78	6124.96	531.57	16452.9	567.58	1315.05	86446.3	39201.8	97691.5	58873.6	73744.3	79315.9	85233	40353.5	55663.5	1539.36	25882.8	5427.61
MAG9	2960.74	349.37	1210.26	2304.02	535.43	1854.8	0.0833	0.119107	d__Bacteria	p__Firmicutes_A	c__Clostridia	o__Oscillospirales	f__Oscillospiraceae	g__	s__	3049.3	6132.85	3723.82	1678.06	2348.27	3501.39	2568.79	1989.32	2638.11	2252.52	3661.71	1984.79	7467.97	3282.46	1505.12	727.58	962.99	2982.13	1378.55	737.29	1265.21	2439.24	2010.15	2889.55
MAG90	3336.09	459.72	1592.53	15205	2440.01	8452.43	0.0002	0.000712745	d__Bacteria	p__Bacteroidota	c__Bacteroidia	o__Bacteroidales	f__Bacteroidaceae	g__Prevotella	s__Prevotella sp002391185	2309.13	4687.57	1947.09	5119.89	4328.41	1846.9	2673.89	6602.65	1254.05	3009.42	2397.36	3856.71	5209	17656.7	22808	25412.4	24323	10703.3	15364.3	28312.7	10719.6	3522.25	11890.9	6537.71
MAG91	6812.6	1623.37	5623.53	6295.31	1971.85	6830.7	0.5637	0.607281	d__Bacteria	p__Bacteroidota	c__Bacteroidia	o__Bacteroidales	f__Bacteroidaceae	g__Prevotella	s__Prevotella sp002373375	7842.35	5551.78	1638.83	23230.5	7017.3	1783.26	2972.27	6952.21	5060.6	5235.94	6031.77	8434.44	9073.34	6613.02	9064.88	1898.02	24025.8	1083.95	1856.68	2949.44	1520.53	1922.66	13233.1	2302.36
MAG92	3787.8	255.93	886.58	24166.7	13512.4	46808.2	0.204	0.256216	d__Bacteria	p__Bacteroidota	c__Bacteroidia	o__Bacteroidales	f__Bacteroidaceae	g__Prevotella	s__Prevotella sp900314655	4446.52	4148.06	2728.52	4597.58	3634.27	5887.46	3116.44	2949.15	3641.5	3884.81	3111.59	3307.71	3536.29	4397.32	2843.83	2397.77	4992.46	6580.45	4375.95	19909	156995	3291.35	76857.9	3822.56
MAG93	4462.63	457.17	1583.67	5163.72	2230.99	7728.39	0.106	0.146257	d__Bacteria	p__Bacteroidota	c__Bacteroidia	o__Bacteroidales	f__Bacteroidaceae	g__UBA4334	s__UBA4334 sp900318775	5040.17	7982.85	1967.37	6214.61	4622.96	2566.52	3871.71	5098.7	3583.93	4540.81	3887.11	4174.79	1876.32	4278.42	2891.95	815.63	7297.94	1762.45	2866.44	1582.78	1052.26	4083.4	29007.9	4449.11
MAG94	471.33	38.49	133.34	24881.3	10429.3	36128.2	0.5254	0.577509	d__Bacteria	p__Bacteroidota	c__Bacteroidia	o__Bacteroidales	f__Bacteroidaceae	g__Prevotella	s__Prevotella sp900315635	505.15	545.72	559.38	817.4	467.23	433.63	367.83	384.17	475.98	298.93	370.33	430.22	241.09	410.22	433.35	60884	408.68	410.15	62637.4	92052.8	75200.1	451.55	5150.66	295.75
MAG95	1051.65	204.93	709.89	2128.38	547.75	1897.45	0.1333	0.177222	d__Bacteria	p__Firmicutes_A	c__Clostridia	o__Lachnospirales	f__Lachnospiraceae	g__Eubacterium_S	s__Eubacterium_S uniforme	485.91	1497.99	3020.1	813.78	1523.17	871.04	529.35	896.18	999.83	848.35	450.46	683.68	2138.71	5587.14	1347.38	480.02	995.64	1751.99	1369.71	484.42	1386.44	582.54	6004.14	3412.44
MAG96	1923.56	276.13	956.55	2156	571.9	1981.13	0.5637	0.607281	d__Bacteria	p__Bacteroidota	c__Bacteroidia	o__Bacteroidales	f__Bacteroidaceae	g__UBA4334	s__UBA4334 sp900316975	2221.39	2734.48	980.97	2379.98	1587.61	1290.26	1042.78	3242.97	699.69	2327.08	1010	3565.47	3973.75	3047.29	2358.79	1428.99	4952.36	620	449.3	799.34	411.91	848.1	6252.95	729.19
MAG97	1320.18	337.12	1167.82	2261.89	615.54	2132.29	0.204	0.256216	d__Bacteria	p__Cyanobacteria	c__Vampirovibrionia	o__Gastranaerophilales	f__Gastranaerophilaceae	g__UBA2813	s__	953.41	1939.32	594.76	1371.93	2782.28	359.86	508.65	558.98	102.7	2651.9	358.14	3660.23	1859.28	1619.59	2015.89	1398.33	1989.41	7702.59	517.63	1659.21	632.93	298.63	5268.04	2181.14
MAG98	66.34	17.06	59.11	680.83	502.67	1741.3	0.1333	0.177222	d__Bacteria	p__Proteobacteria	c__Alphaproteobacteria	o__RF32	f__CAG-239	g__RUG410	s__	71.44	172.72	38.42	4.43	87.35	6.9	38.47	78.14	7.95	57.22	49.26	183.82	93.26	808.18	117.23	26.41	72.87	164.01	198.91	18.29	11.77	23.77	6159.59	475.68
MAG99	893.98	155.91	540.1	1729.72	446.12	1545.39	0.0833	0.119107	d__Bacteria	p__Firmicutes_A	c__Clostridia	o__Saccharofermentanales	f__Saccharofermentanaceae	g__Saccharofermentans	s__	874.11	689.82	1657.56	286.83	908.28	2069.61	993.29	1207.57	411.13	813.7	328.92	486.93	2071.84	4482.15	1276.46	516.76	992.79	732.62	668.5	1395.8	911.86	883.28	5293.57	1531.02
