# Supplementary material for: Distinct microbial hydrogen and reductant disposal pathways explain interbreed variations in ruminant methane yield
Source: Research Square preprint supplement (doi:10.21203/rs.3.rs-2831003/v1), 2024-04-11
Supplement: Supplementary file 12 [file fea7f9d088f2a94f29b2fc55.xlsx]

## Sheet: MG
Gene name	Jersey			Holstein			P	Adjust-P	Holstein	Holstein	Holstein	Holstein	Holstein	Holstein	Holstein	Holstein	Holstein	Holstein	Holstein	Holstein	Jersey	Jersey	Jersey	Jersey	Jersey	Jersey	Jersey	Jersey	Jersey	Jersey	Jersey	Jersey
	Average relative abundance	Standard deviation	Standard error of the mean	Average relative abundance	Standard deviation	Standard error of the mean			127	134	133	143	140	122	125	117	149	132	130	142	145	152	118	147	121	151	135	136	150	146	141	137
Acetoacetyl-CoA reductase-PaaH	4.62705	0.57497	1.99177	9.45255	0.70101	2.42838	0.0003	0.000936874	8.87771	6.55123	12.4102	7.67995	9.75599	9.33211	7.76296	13.0858	8.73055	12.1333	5.49352	11.6174	2.90991	2.82214	2.38617	3.3526	5.2511	4.19183	9.13116	6.6074	5.81645	3.01007	5.93289	4.11288
Adenylylsulfate reductase--AprA	3.78668	0.79232	2.74469	7.926	0.998	3.45717	0.0094	0.0148182	9.16236	7.34191	10.6662	4.48771	13.6798	4.82115	10.6724	10.3629	3.75191	9.70224	8.30976	2.15372	1.69748	2.44679	2.95256	1.44068	4.61568	1.79537	4.48264	11.4113	4.82387	1.9644	2.7192	5.09024
Bifurcating hydrogenases-FeFeA3	33.0315	2.40062	8.316	35.6854	2.5601	8.86846	0.204	0.256338	30.4935	17.4433	39.2892	30.1935	45.0058	33.0889	32.3247	51.9964	38.0267	42.3645	29.7841	38.2138	30.0704	26.7139	23.0098	29.2622	34.2374	38.4216	54.2847	26.5483	37.0023	30.9761	38.0802	27.7713
Bifurcating hydrogenases-FeFeA4	0.3467	0.05223	0.18093	0.04055	0.02157	0.07471	<.0001	<.0001	0	0	0	0.0313	0	0	0.08676	0.043093	0	0	0.068444	0.257059	0.832977	0.390077	0.483825	0.254599	0.179085	0.272626	0.209283	0.158303	0.38831	0.327089	0.376542	0.287712
Acyl-CoA dehydrogenase-ACADS	4.06086	0.34052	1.1796	6.67238	0.56534	1.95838	0.0008	0.00198969	4.08616	4.74673	10.3552	5.7419	6.89872	6.29179	5.25518	9.41492	6.59201	7.48406	4.73537	8.46657	3.55461	3.14673	2.13788	3.75964	5.10445	3.63151	6.39612	3.3247	5.73736	3.73414	4.4451	3.75812
Crotonoyl-CoA reductase-FabV	2.46771	0.30689	1.06308	21.3348	5.48528	19.0016	0.0001	0.000596824	27.9825	41.7081	24.2186	21.689	70.6684	13.4672	16.9236	12.774	7.2642	12.2423	4.41482	2.66499	1.91677	2.7677	1.09981	0.687838	3.6262	2.59005	3.20222	3.56003	1.8729	1.67719	2.43261	4.17922
Dimethyl sulfoxide reductase-DmsA	0.01139	0.0077	0.02668	0.01773	0.00931	0.03225	0.5693	0.633996	0.080016	0.067401	0	0	0	0	0	0	0	0	0	0.06532	0	0	0	0	0	0	0.073227	0	0	0	0	0.063434
Energy-converting hydrogenases-NiFec	0.19725	0.04725	0.16367	0.03849	0.02853	0.09882	0.0013	0.00299819	0	0	0	0	0	0	0	0	0.089523	0.031467	0	0.340881	0.290929	0.149986	0.034586	0.140629	0.178023	0.210049	0.345427	0.202529	0.08195	0	0.613438	0.119404
Energy-converting hydrogenases-NiFe4d	0.04097	0.0313	0.10842	0.27225	0.07642	0.26472	0.002	0.00379762	0.255778	0.233801	0.817233	0.037975	0.054912	0.357926	0.736483	0.216026	0.036999	0.344184	0.17572	0	0	0.018769	0.022376	0	0.381801	0	0	0.049557	0	0	0	0.01908
Energy-converting hydrogenases-NiFe4e	3.46586	0.32109	1.1123	5.54767	0.41736	1.44577	0.0015	0.00305467	5.21549	4.7707	6.88634	6.678	8.63653	4.12652	4.5898	5.04267	6.70715	4.97768	3.35563	5.58556	3.57992	2.508	2.78587	3.52159	1.53626	3.63858	5.63003	2.82428	4.38584	4.21393	4.47254	2.49348
Energy-converting hydrogenases-NiFe4f	1.06126	0.17046	0.59051	0.82862	0.12234	0.42378	0.3865	0.450889	0.465223	0.421153	0.351742	0.609896	0.60653	0.995969	1.1303	0.827522	1.0336	0.421202	1.62135	1.45901	0.705599	0.768528	2.01765	0.312204	0.231123	1.82933	1.53585	1.75385	0.818465	1.09249	0.808431	0.861589
Energy-converting hydrogenases-NiFe4g	5.54596	0.46298	1.60382	3.39636	0.29916	1.03633	0.0039	0.00657684	2.10298	1.35657	2.65645	3.16166	2.74904	3.68993	4.08121	4.11563	4.50197	4.24991	3.30643	4.78452	4.62535	6.6571	4.18609	7.63681	3.63588	6.77652	7.43138	3.875	7.28477	3.55894	6.3046	4.57909
Fermentative hydrogenases-FeFeA1	20.2246	2.53832	8.79299	6.85324	0.97272	3.3696	0.0002	0.00071412	7.56626	4.49238	11.1734	2.27153	11.1164	3.2403	7.10324	10.7606	3.12598	8.45045	9.28538	3.65299	21.874	17.7476	35.0761	14.0456	11.2772	26.6687	21.4477	19.4401	5.86919	20.7459	34.7491	13.7535
Fermentative hydrogenases-FeFeA2	2.88407	0.26333	0.9122	2.76137	0.29771	1.0313	0.6033	0.656961	1.65043	1.40877	2.97149	2.48128	4.60151	1.92119	2.39036	3.30516	4.07645	2.67894	1.7664	3.8845	4.38243	1.92539	1.95048	2.69702	1.63184	3.12938	4.35003	2.07304	3.27581	3.49979	3.08353	2.61011
Fermentative hydrogenases-FeFeB	9.76564	0.80431	2.78622	11.2986	0.75486	2.61491	0.2253	0.276048	10.8061	9.68755	10.2082	12.9735	15.8702	9.85727	8.62076	15.516	13.0851	12.1034	8.18158	8.6731	13.2252	7.83847	6.36442	11.5132	6.16454	10.2612	15.459	9.16849	10.6417	9.32637	10.2688	6.95648
Glutamate synthase-GdhA	41.6334	2.36323	8.18646	109.599	13.7601	47.6665	<.0001	<.0001	139.128	128.054	156.564	86.3879	227.559	82.7886	102.625	103.649	69.9705	93.9813	65.2556	59.2203	43.3599	29.7514	42.106	28.9192	41.7939	45.9997	43.0902	61.0721	44.7045	40.8261	36.9865	40.9915
Glutamate synthase-GltB	7.04152	0.69827	2.41888	37.8502	9.71484	33.6532	<.0001	<.0001	54.0381	56.7366	55.6675	33.705	129.648	16.8767	26.2452	25.6062	14.1235	19.8951	12.8068	8.85413	5.40023	5.39529	6.39833	7.14312	4.36745	6.66173	7.33561	13.6821	9.24491	6.78603	5.78225	6.30118
Glutamate synthase-GltD	27.2897	2.28112	7.90203	85.9837	11.998	41.5624	<.0001	<.0001	122.262	97.2324	120.073	75.5677	189.068	61.495	82.0582	73.9238	46.8888	69.7625	50.5735	42.8989	26.6118	19.1768	23.0491	21.5638	27.6188	28.2666	28.4884	49.3954	31.1355	27.089	19.4817	25.5988
Hydrogenase-associated diaphorases-HydB	79.2001	4.94758	17.1389	71.9475	5.27672	18.2791	0.3865	0.450889	56.1248	36.218	70.3328	62.6442	67.8466	80.6058	63.3698	98.9501	91.281	92.5947	58.1999	85.2018	74.2646	68.7757	57.4865	88.425	102.526	86.8211	113.468	57.4957	81.8153	64.6317	83.1806	71.5109
Lactate dehydrogenase-LDH	3.06538	0.58631	2.03103	8.62305	0.99795	3.457	<.0001	0.000936874	12.4053	10.3833	9.68371	7.91584	11.675	9.43245	5.17733	8.88357	5.4096	14.5699	4.84497	3.0955	2.75702	2.35275	2.81512	1.47916	1.88636	1.25912	5.75722	8.33366	3.47197	2.02433	2.01399	2.63383
Malate dehydrogenase-Mdh	6.53647	0.82174	2.8466	1.67139	0.15565	0.53919	<.0001	0.000679529	1.31538	1.70913	1.23017	1.16476	1.09438	1.28323	1.5716	1.37254	1.85954	2.57435	2.46167	2.41995	6.74311	4.99667	12.8982	4.83846	7.20425	8.69009	6.34492	5.89419	1.49137	5.58652	9.24652	4.50345
Methanogenesis-Mer	0.07579	0.02372	0.08217	0.00894	0.00676	0.02342	0.0202	0.0290264	0	0	0	0	0	0	0	0	0	0.028794	0	0.078512	0.184785	0.090945	0	0.224627	0	0.125617	0.166351	0	0	0	0.060769	0.056394
Methanogenesis-McrA	1.08752	0.21959	0.76068	0.40951	0.06458	0.22371	0.0022	0.00387396	0.167589	0.694582	0.193283	0.598978	0.192202	0.254595	0.456114	0.528818	0.248927	0.547417	0.221659	0.809922	0.492615	2.08712	0.626169	2.93926	1.03861	1.68738	0.801318	0.510252	0.686754	0.692129	0.886005	0.602597
Methanogenesis-Mtd	0.18839	0.05846	0.20252	0.04671	0.01114	0.03859	0.0174	0.0258819	0	0.096509	0.062944	0.089697	0	0.053035	0.06036	0.031336	0.110592	0.029328	0	0.026685	0.10188	0.697176	0.232182	0.456461	0.035895	0.126212	0.13545	0	0.195115	0.088145	0	0.19222
Methanogenic hydrogenases-Fe	0.19798	0.08035	0.27833	0.02549	0.01235	0.04278	0.0207	0.0290264	0	0.014645	0	0.147239	0	0	0	0.034929	0.035362	0.016206	0	0.057451	0.054126	0.544385	0.159488	0.941524	0.195828	0.214199	0	0.040564	0.112506	0	0.113194	0
Methanogenic hydrogenases-NiFe3a	0.73917	0.19746	0.68403	0.32734	0.06467	0.22402	0.119	0.15349	0.060517	0.261153	0.130786	0.610314	0.088263	0.307364	0.22892	0.344472	0.102669	0.706868	0.57765	0.509066	0.543936	2.11844	0.185209	1.89022	0.316272	0.557998	0.328642	0.141205	0.744438	0.666554	1.3314	0.045731
Methanogenic hydrogenases-NiFe3c	1.124	0.24502	0.84879	0.33077	0.06662	0.23078	0.0015	0.00305467	0.081346	0.8775	0.296065	0.447181	0.505079	0.490875	0.110817	0.322952	0.316675	0.109821	0.093397	0.317523	0.509801	2.49369	0.482371	2.85938	0.644827	1.56776	0.806704	0.590349	1.13131	0.501716	1.65311	0.246998
Methanogenic hydrogenases-NiFe4h	0.44626	0.12437	0.43082	0.12598	0.03142	0.10885	0.013	0.0199714	0.071734	0.0608	0.027849	0.2043	0.034565	0.14762	0.026635	0.130589	0.225305	0.226622	0	0.355767	0.148254	1.15638	0.126464	1.37892	0.101476	0.742871	0.461873	0.141549	0.264068	0.334209	0.412832	0.086247
Methanogenic hydrogenases-NiFe4i	0.57065	0.18758	0.64981	0.13422	0.05888	0.20395	0.0046	0.00756776	0.016864	0.015409	0.080889	0.656698	0	0	0	0.091659	0.391161	0.082022	0.017133	0.258849	0.043795	1.23755	0.275933	2.30617	0.094144	0.858119	0.458828	0.319775	0.172427	0.253561	0.66881	0.158684
Nitrate reduction-NapA	0.38396	0.07381	0.25568	0.4907	0.13154	0.45565	0.7728	0.788931	0.019645	0.105974	0.068707	0.334781	0.116818	0.550878	0.660569	0.543962	1.64811	0.740751	0.801605	0.296657	0.333382	0.152949	0.988475	0.129335	0.476335	0.569205	0.148038	0.531711	0.240804	0.406419	0.112736	0.518161
Nitrate reduction-NarG	0.78961	0.18009	0.62386	13.5047	3.98999	13.8217	0.0003	0.000899979	29.4534	15.5248	31.0155	2.84742	43.3454	4.00707	7.99372	9.81024	1.50262	11.5844	4.42806	0.544124	0.37113	0.166093	1.67861	0.282306	0.182837	0.795983	0.643667	2.19925	0.604168	0.483432	1.18486	0.882975
Nitrite reduction to ammonium-NrfA	40.2239	2.90592	10.0664	53.913	2.41069	8.35089	0.0018	0.00357256	49.6297	39.7543	51.8116	40.4076	58.3015	55.4945	64.3709	53.0413	49.3639	57.7715	65.7427	61.2665	45.8027	30.0374	39.0365	31.8254	39.2926	48.2754	26.6971	64.4517	44.5258	40.2044	32.924	39.6138
Nitrous oxide reduction-NosZ	0.16621	0.05682	0.19684	0.3011	0.12478	0.43226	0.7068	0.736924	0	0.077414	0	0	0.099881	0.917657	0.008805	0.113187	1.02981	1.07883	0.086691	0.200907	0.408907	0.047452	0.046012	0.450751	0.033854	0.009441	0.020903	0.390523	0.470682	0.041765	0	0.074281
Respiratory hydrogenases-NiFe1b	0.14778	0.03652	0.1265	0.01892	0.00986	0.03416	0.0002	0.00071412	0	0	0	0	0	0	0.06153	0	0.027464	0	0.029845	0.108169	0.032047	0.08372	0.162914	0.262395	0.144154	0.095645	0.171047	0.070716	0.05375	0.087598	0.497375	0.111985
Respiratory hydrogenases-NiFe1d	2.01279	0.19193	0.66487	8.07253	1.21903	4.22285	0.0001	0.000596824	9.51697	5.39453	13.9556	4.67099	13.7893	3.72457	9.33183	13.1826	3.18749	10.1573	7.63395	2.32526	2.07137	2.52895	2.03707	1.74199	0.52565	2.0419	2.48415	2.95828	2.36195	2.57499	1.28285	1.5443
Sensory hydrogenases-FeFeC1	0.76611	0.13364	0.46293	0.75002	0.13515	0.46819	0.8174	0.817361	0.305959	0.683509	0.465734	1.01746	1.93745	0.415218	0.272986	0.488057	0.82154	0.528573	0.917911	1.14582	1.94691	0.845838	0.601253	1.05606	0.095617	0.943958	0.404688	0.673121	0.800371	0.851004	0.661953	0.312563
Sensory hydrogenases-FeFeC2	0.95154	0.17993	0.62331	3.08887	0.3152	1.09189	<.0001	0.000493344	3.42313	2.72659	2.69532	3.37993	3.17759	3.70558	1.7557	5.84065	3.04302	3.39851	2.31264	1.60778	0.687422	0.442102	0.459067	0.457966	0.453887	0.837694	2.52213	0.700011	1.57186	0.845819	1.4724	0.968164
Sensory hydrogenases-FeFeC3	1.50142	0.18384	0.63685	1.40343	0.16306	0.56485	0.5637	0.633996	0.929072	0.835793	1.36194	1.74424	0.82756	1.52029	1.56109	2.59308	2.23945	1.23423	0.970088	1.02429	1.3886	1.75599	1.16195	2.64897	1.37194	1.08036	2.44108	0.9979	0.973454	0.856196	2.32949	1.01108
Sulfite reductase-AsrA	2.1296	0.29615	1.0259	1.83012	0.15029	0.52063	0.6442	0.686178	2.54649	1.5921	2.28504	1.30102	1.99014	2.14242	0.886429	2.10351	2.44757	1.3302	1.39175	1.94473	1.70279	2.56682	1.42607	3.00837	1.20341	1.53873	2.18105	4.94821	2.09077	1.73942	1.65539	1.49419
Sulfite reductase-DsrA	0.32364	0.0636	0.22033	0.02226	0.00908	0.03146	0.0003	0.000911418	0	0.025772	0	0	0	0.038521	0.042214	0	0	0.081249	0	0.079401	0.140526	0.318204	0.114606	0.274146	0.447836	0.616796	0.448055	0.280016	0.075731	0	0.714	0.453801
Wood-Ljungdahl-AcsB	5.17528	0.27081	0.93811	4.23004	0.65516	2.26953	0.0327	0.0444586	2.34897	1.17784	3.40235	3.87719	3.58189	4.92104	4.22569	9.91297	4.35461	5.96654	1.80872	5.18264	5.2956	5.413	4.81772	5.41907	5.59911	6.03262	6.22575	2.76085	5.61402	4.6082	5.88671	4.43069
Wood-Ljungdahl-CODH	3.70682	0.2635	0.9128	22.5704	5.97914	20.7124	0.0004	0.00110525	28.4607	29.9925	32.4187	19.3907	80.1766	9.19101	22.5939	21.2961	5.45444	9.51169	9.512	2.84671	2.81757	3.22472	3.0705	4.78926	3.41933	4.02669	2.7648	5.92506	3.65539	4.1757	3.18505	3.42777
Wood-Ljungdahl-CooS	6.92694	0.37326	1.29302	25.5123	5.76975	19.987	0.0003	0.000899979	30.8299	31.0443	34.6574	23.3466	81.3542	12.732	25.7294	25.2082	8.61049	14.3851	12.1817	6.06775	5.82626	5.50167	7.83273	7.45233	5.10009	8.52488	7.08857	9.33892	6.6512	6.50821	7.62685	5.67162
Wood-Ljungdahl-FdhA	0.68582	0.1122	0.38867	0.44246	0.10205	0.3535	0.0833	0.110269	0.098372	0.125794	0.31788	0.162861	0.4549	0.091521	0.310609	0.738256	0.264328	0.773945	1.21194	0.75913	0.413087	1.16657	0.336323	1.45427	0.446409	0.521102	0.551317	1.07279	0.636902	0.268573	0.353559	1.00891
Succinate dehydrogenase-SdhA, FrdA	14.8018	1.27145	4.40444	29.5468	5.87507	20.3518	0.0022	0.00387396	30.5423	39.2309	27.8955	32.5353	88.5501	17.077	30.7403	25.0625	17.2166	11.7623	15.1231	18.8254	9.25183	13.4272	14.8868	14.3936	26.931	13.3197	15.3084	14.6579	17.5164	10.4815	12.589	14.858

## Sheet: MT
Gene name	Jersey			Holstein			P	Adjust-P	Holstein	Holstein	Holstein	Holstein	Holstein	Holstein	Holstein	Holstein	Holstein	Holstein	Holstein	Holstein	Jersey	Jersey	Jersey	Jersey	Jersey	Jersey	Jersey	Jersey	Jersey	Jersey	Jersey	Jersey
	Average relative abundance	Standard deviation	Standard error of the mean	Average relative abundance	Standard deviation	Standard error of the mean			127	134	133	143	140	122	125	117	149	132	130	142	145	152	118	147	121	151	135	136	150	146	141	137
Acetoacetyl-CoA reductase-PaaH	32.6309	7.592	26.2991	96.7676	24.249	84.0012	0.0079	0.0288215	39.02	46.1125	234.063	46.3146	291.986	52.0395	75.7202	61.8743	51.6742	150.906	45.2243	66.2776	16.554	7.17142	23.1951	26.2138	47.2074	82.0079	16.1789	48.3585	80.6719	23.2088	7.43125	13.3724
Adenylylsulfate reductase--AprA	7.8426	2.291	7.9351	9.3776	3.6	12.4703	0.8625	0.935894	8.22702	44.9498	3.54447	2.73589	6.25024	0.761099	0.368593	18.3242	14.3185	1.53466	7.80628	3.71038	3.26631	3.30256	4.96992	9.82335	6.33843	3.20253	24.9026	23.619	3.25458	1.9388	4.94819	4.54472
Bifurcating hydrogenases-FeFeA3	227.283	42.921	148.684	109.675	16.002	55.4318	0.0282	0.0654663	39.8884	61.698	128.889	83.6945	202.5	56.761	59.3787	89.9232	102.229	188.962	123.936	178.246	99.881	106.035	257.823	240.615	429.929	549.529	167.864	248.593	328.33	119.067	54.1533	125.576
Bifurcating hydrogenases-FeFeA4	0.5368	0.29	1.004	0.1904	0.128	0.445	0.2501	0.354357	0	0	0	0	0	0	1.09641	0	0	0	0	1.18805	0	0	0.780047	0	0.713079	0	3.46529	0	0	0	0.340904	1.14257
Acyl-CoA dehydrogenase-ACADS	19.7033	4.148	14.3689	11.4562	1.727	5.9818	0.204	0.310858	7.09761	7.56722	20.3874	5.71715	13.6999	3.3794	4.54669	13.4077	10.3761	13.7973	16.3063	21.1922	7.5494	6.36869	20.0335	16.3747	42.3646	44.4876	15.6612	35.7879	26.105	9.75367	3.26092	8.69268
Crotonoyl-CoA reductase-FabV	15.1313	2.786	9.6498	61.0857	9.644	33.4072	0.0007	0.00671504	114.558	79.9639	83.6135	65.5457	22.2057	58.1673	109.481	70.7093	54.805	43.9217	16.033	14.0247	18.8824	13.2414	5.45297	3.27297	4.74529	22.0259	10.2278	10.7656	16.5537	21.3541	16.9006	38.1529
Dimethyl sulfoxide reductase-DmsA	0	0	0	0	0	0	1	1	0	0	0	0	0	0	0	0	0	0	0	0	0	0	0	0	0	0	0	0	0	0	0	0
Energy-converting hydrogenases-NiFec	0.3349	0.107	0.3694	0.0545	0.047	0.1629	0.024	0.0612404	0	0	0	0	0	0.088119	0.565413	0	0	0	0	0	0	0	0.300048	0.309304	0	0.303952	0.566235	1.09038	0	0.654601	0	0.793921
Energy-converting hydrogenases-NiFe4d	2.3927	0.648	2.2452	2.0739	0.51	1.7673	0.931	0.968971	0.128905	0	0.757115	0.784943	3.97313	3.46257	2.08343	2.8353	0.281421	3.00031	1.9454	5.63422	5.00256	3.3634	6.63707	2.48006	4.97857	1.8374	0.741092	0	0.210757	0.332557	0.176885	2.95225
Energy-converting hydrogenases-NiFe4e	1.3838	0.311	1.0769	2.2395	0.382	1.3238	0.094	0.184379	1.19935	0.877022	1.58814	1.87558	4.46988	2.9539	1.01278	1.50329	0.598416	3.53472	3.56479	3.6963	3.25109	1.0964	1.76411	1.39045	0.994164	0.956699	0	3.50628	1.58588	1.2334	0.8273	0
Energy-converting hydrogenases-NiFe4f	0.0195	0.02	0.0676	0.024	0.022	0.0754	0.5468	0.697116	0	0	0.025903	0	0	0.262326	0	0	0	0	0	0	0.234015	0	0	0	0	0	0	0	0	0	0	0
Energy-converting hydrogenases-NiFe4g	2.1232	0.585	2.0264	1.5469	0.255	0.8848	0.9081	0.964806	1.05102	1.47217	1.34256	1.34979	1.42403	0.795966	0.92203	1.73779	2.43789	3.96955	0.833622	1.2268	0.180717	1.15274	0	3.6428	2.58034	1.76509	3.91909	4.37498	0	0.624746	6.2436	0.994563
Fermentative hydrogenases-FeFeA1	10.4578	2.167	7.5073	1.5279	0.564	1.9521	0.0002	0.0028031	1.09008	0.643454	1.5054	0.423576	0.588605	1.44651	1.08607	0.273516	6.91965	0.263733	0.335948	3.75857	2.43984	11.5396	15.1666	4.81765	14.5202	4.1499	18.4348	4.26824	2.52962	4.9131	23.7107	19.0039
Fermentative hydrogenases-FeFeA2	0.6843	0.17	0.5873	1.2016	0.326	1.1283	0.3263	0.426763	1.29768	1.68938	1.69206	2.05922	3.34949	0.133447	0.446994	0.142741	0.172579	0.342212	2.83138	0.262579	0.891979	0.241453	0.100559	0.900371	1.32985	1.78	0.437904	1.51278	0.295106	0.435988	0.184457	0.10116
Fermentative hydrogenases-FeFeB	4.2558	0.59	2.044	7.2583	0.939	3.254	0.0153	0.0459415	6.22208	5.07789	5.84686	7.32215	7.43864	7.31954	9.59985	13.0833	4.42231	13.1538	2.67355	4.93912	4.80382	7.49336	2.14402	1.02041	3.38463	4.24954	7.26406	5.24184	1.82284	5.82436	4.56159	3.25889
Glutamate synthase-GdhA	288.69	39.086	135.399	831.121	134.994	467.632	0.0002	0.0028031	637.514	914.742	1609.28	519.879	1890.98	400.159	616.463	851.509	480.842	918.549	438.369	695.167	241.75	128.666	241.041	273.093	486.645	569.224	313.028	330.148	361.73	232.256	129.661	157.042
Glutamate synthase-GltB	0.3073	0.069	0.2401	16.6867	4.372	15.1463	0.0002	0.0028031	23.2619	25.3123	17.8195	14.888	6.38992	24.4021	55.1827	17.0225	12.9893	1.59203	1.17814	0.2026	0.234047	0.071838	0.477207	0.209366	0.958949	0.137731	0.161921	0.348868	0.289361	0.114925	0.243826	0.439394
Glutamate synthase-GltD	47.6045	3.826	13.2528	81.2187	5.13	17.7704	0.0001	0.0028031	66.46	88.8188	77.8958	89.8136	90.2421	74.039	124.987	82.0554	51.8166	83.4767	77.1222	67.8973	70.1093	33.4369	54.9076	43.825	43.6659	50.22	35.1304	64.8396	46.111	62.8886	29.6498	36.4701
Hydrogenase-associated diaphorases-HydB	333.557	50.062	173.419	165.158	21.258	73.641	0.0047	0.0198438	59.4383	89.2322	162.368	154.082	277.6	89.8561	82.2787	188.43	200.867	250.613	171.185	255.949	171.943	200.985	378.95	334.816	561.509	721.705	290.26	358.93	430.401	194.551	136.678	221.954
Lactate dehydrogenase-LDH	6.3808	0.793	2.7465	13.907	2.817	9.7578	0.013	0.0443446	16.4587	7.45379	12.9922	7.76635	33.0771	14.1457	11.0695	12.0331	6.65675	33.7791	6.06364	5.38809	7.21115	6.45333	6.82047	3.05244	1.88339	5.46435	10.0254	6.9103	2.99631	10.8391	8.62569	6.28775
Malate dehydrogenase-Mdh	28.6916	3.088	10.6975	13.3379	2.226	7.7094	0.0012	0.0104064	5.14593	7.61467	4.53552	11.2684	8.53561	11.4936	11.615	19.7195	10.1262	15.6468	25.8846	28.4686	14.0965	49.3723	32.7937	28.4843	40.5065	24.3924	33.597	17.679	20.9901	25.0086	18.0845	39.2943
Methanogenesis-Mer	3.6705	1.255	4.3459	0.6588	0.255	0.8824	0.0032	0.0149982	0	0.417606	0.877806	0.221227	0.345683	0.12776	0.403481	0.375188	0.198473	2.24127	0	2.69756	1.0076	3.84163	1.65518	3.55025	16.2601	4.1735	6.22307	3.29256	0.537215	1.25158	0	2.25285
Methanogenesis-McrA	123.056	26.978	93.4553	109.741	38.992	135.072	0.2253	0.328361	79.8635	95.5976	35.1714	48.1272	66.2951	28.8379	73.0385	449.575	327.693	44.6038	4.31899	63.7726	46.1947	335.652	60.0018	83.5583	109.755	84.0061	260.911	33.115	61.031	73.3366	185.453	143.658
Methanogenesis-Mtd	4.3993	0.936	3.242	2.87	0.947	3.2789	0.0433	0.0920298	0.368752	0.618033	8.62841	1.12559	4.90111	0.515818	0.411563	1.10772	1.21186	8.20911	0.558064	6.78395	2.96515	6.91873	2.65575	1.93844	2.32878	4.46161	1.65062	11.0087	5.22702	1.97491	1.83598	9.82622
Methanogenic hydrogenases-Fe	0.387	0.14	0.4849	0.0534	0.051	0.1772	0.024	0.0612404	0	0	0	0	0	0.02574	0	0	0	0	0	0.615645	0.153363	0.227898	1.2833	0.789043	0	0.925908	0	1.06913	0	0	0.195022	0
Methanogenic hydrogenases-NiFe3a	21.6138	4.441	15.3835	14.2487	4.498	15.5799	0.1333	0.226656	3.25949	4.48457	16.6717	6.64438	21.6589	4.67307	3.28951	3.76944	13.7936	42.625	2.9819	47.1332	26.7098	47.926	10.7178	2.0895	9.18403	7.91821	23.2143	46.5269	14.6254	11.8494	20.4344	38.1695
Methanogenic hydrogenases-NiFe3c	30.8091	5.152	17.8487	27.7696	5.133	17.7799	0.6861	0.832867	15.5829	36.8009	14.1022	17.0407	30.3116	5.8687	20.9179	51.2463	58.9186	38.044	3.18353	41.2181	21.3197	62.6639	10.2025	23.0559	42.8192	16.8372	54.5692	26.2135	11.1338	15.3689	49.0227	36.503
Methanogenic hydrogenases-NiFe4h	0.3148	0.17	0.5879	0.1136	0.079	0.2728	0.2072	0.310858	0	0.18232	0.242315	0	0.939027	0	0	0	0	0	0	0	0	0	0.24959	0	0	0.178424	0	0.833425	0.271804	0	0.225124	2.01956
Methanogenic hydrogenases-NiFe4i	0.0279	0.028	0.0968	0.0775	0.057	0.1977	0.3066	0.422608	0	0	0.245498	0	0	0.019855	0	0	0	0	0	0.664132	0	0	0	0	0	0	0	0	0	0	0	0.335274
Nitrate reduction-NapA	1.134	0.384	1.3288	0.2124	0.112	0.388	0.0881	0.17963	0	0.497156	0	0	0	0.174028	0	0.190942	1.35029	0.211225	0	0.125548	2.86377	3.87447	0.093621	1.32773	2.01536	2.21571	0.089356	0	0	0.128549	0.066754	0.933222
Nitrate reduction-NarG	0.0486	0.049	0.1682	0.3782	0.105	0.3654	0.0022	0.0124608	0.484126	0.65596	1.01616	0.034105	0.90115	0.138841	0.33685	0	0	0.673058	0.298481	0	0.582733	0	0	0	0	0	0	0	0	0	0	0
Nitrite reduction to ammonium-NrfA	97.2739	15.147	52.4721	47.676	11.836	41.0022	0.0179	0.0507913	25.6933	109.651	34.1627	19.1194	10.6482	13.4931	35.7464	149.288	36.4058	41.6482	47.8503	48.405	51.9289	33.602	177.738	123.94	168.144	95.8123	144.968	93.6403	80.558	57.3727	13.6844	125.899
Nitrous oxide reduction-NosZ	0.0061	0.006	0.0211	0.0403	0.021	0.0727	0.1224	0.223003	0.114262	0.183397	0	0	0	0.010333	0	0.175493	0	0	0	0	0	0	0	0	0	0	0	0	0	0.072926	0	0
Respiratory hydrogenases-NiFe1b	0.5323	0.274	0.95	0.0223	0.017	0.0594	0.014	0.0447808	0	0	0	0	0	0.066389	0	0	0.200795	0	0	0	0.274319	0	0	2.05343	0.273663	0.289288	2.95435	0	0	0	0.250952	0.291016
Respiratory hydrogenases-NiFe1d	2.1935	0.448	1.5506	2.2747	0.77	2.6668	0.6442	0.801281	1.04353	1.73809	1.28476	2.85981	0.446958	0.794965	1.08834	2.43051	1.32695	0.236851	4.02268	10.0229	1.15989	1.691	4.08722	3.77408	2.61619	0.669593	0.485101	2.82922	0.143748	2.87815	1.0879	4.90029
Sensory hydrogenases-FeFeC1	0.1979	0.102	0.3525	0.1829	0.086	0.2987	0.7344	0.851182	0	0	0.0931	0	0	0.038509	0.258857	1.03405	0.231974	0.132121	0.405989	0	0.395289	0	0	0	0	0.192769	0	0.463406	0	1.18752	0.135304	0
Sensory hydrogenases-FeFeC2	0.5091	0.141	0.4881	1.5799	0.289	1.0027	0.0056	0.0218644	0.066614	1.18068	1.66354	1.43566	0.335493	1.93913	3.48208	2.32357	0.749254	2.97051	1.56478	1.24774	0.71659	0	0.296739	0.105705	0	1.40581	0.33666	0.578646	0.375381	0.850312	0.094012	1.34913
Sensory hydrogenases-FeFeC3	0.2749	0.082	0.2826	1.0753	0.37	1.2812	0.0375	0.0831538	0.9418	0.202757	3.65157	0.229618	3.57323	0.466312	0.276161	1.76916	0.137046	0.958191	0.697566	0	0.271127	0.198658	0.376505	0.581645	0.412738	0.982205	0.096551	0	0.131578	0	0.117496	0.12998
Sulfite reductase-AsrA	0.4745	0.16	0.5544	0.3411	0.081	0.2812	0.7022	0.832867	0.264256	0.635211	0.56662	0.344131	0.248949	0.152013	0.72888	0	0	0.385979	0	0.76671	0.409164	0.419164	0.345944	0.870022	0	0	1.05455	1.7351	0	0	0.860262	0
Sulfite reductase-DsrA	1.8745	0.487	1.6854	0.8207	0.286	0.9901	0.1162	0.219525	0.917717	2.24809	0.136835	0	0	0.090497	0	2.23861	2.55875	0	0.754776	0.903256	0.256224	0.777283	0.764237	1.97206	3.07816	1.2647	4.94455	4.45075	0	0	2.99656	1.98905
Wood-Ljungdahl-AcsB	6.9975	1.298	4.4956	6.0526	1.962	6.7958	0.1842	0.303054	1.67886	2.4851	1.98838	5.14548	3.68287	1.92497	3.02809	1.91241	5.16227	10.7593	25.4305	9.43321	10.0007	0.228587	5.20236	8.42482	11.7858	5.39337	2.4447	17.3268	5.74208	7.3249	5.00257	5.09279
Wood-Ljungdahl-CODH	4.2167	0.733	2.5384	2.6649	0.729	2.5249	0.0282	0.0654663	1.1238	1.64348	2.16279	6.21634	0.549993	2.36581	3.00623	2.09056	1.03212	0.909899	9.16051	1.71709	10.0219	1.78276	6.97591	3.66231	5.29984	2.11888	3.96149	2.88658	1.64715	3.3737	2.37162	6.49851
Wood-Ljungdahl-CooS	1.2921	0.327	1.1325	0.6827	0.175	0.6049	0.1905	0.303644	0.587331	0	0.341074	0.723993	0	0.568179	0.889591	0	0.429086	1.31787	1.53307	1.80179	0.849661	0	2.50128	1.77722	3.67068	1.56916	1.47139	2.15659	0	0.516324	0	0.992882
Wood-Ljungdahl-FdhA	5.5587	0.925	3.2053	1.6008	0.889	3.0793	0.0015	0.0109006	0.215489	0.267795	0.341095	0.048071	0.498448	0.150012	0.642527	10.7037	0.435823	0.404862	1.32357	4.17797	7.26127	10.8093	7.17847	5.20633	2.94633	0.952124	6.92577	1.83284	1.29417	5.32702	9.04728	7.9236
Succinate dehydrogenase-SdhA, FrdA	235.761	24.412	84.5668	245.32	27.573	95.5171	0.7728	0.875874	336.608	283.301	227.496	443.106	159.081	203.335	260.208	354.045	166.538	144.724	129.154	236.246	194.153	387.885	286.832	301.217	330.772	304.58	142.836	149.932	221.571	219.247	134.897	155.209

## Sheet: MT vs MG
Gene name	Holstein	Holstein	Holstein	Holstein	Holstein	Holstein	Holstein	Holstein	Holstein	Holstein	Holstein	Holstein	Jersey	Jersey	Jersey	Jersey	Jersey	Jersey	Jersey	Jersey	Jersey	Jersey	Jersey	Jersey
	127	134	133	143	140	122	125	117	149	132	130	142	145	152	118	147	121	151	135	136	150	146	141	137
Acetoacetyl-CoA reductase-PaaH	4.39528	7.03875	18.8605	6.03059	29.9289	5.57639	9.75404	4.72836	5.91878	12.4374	8.2323	5.70505	5.68882	2.54112	9.72064	7.81892	8.98999	19.5638	1.77184	7.31885	13.8696	7.71038	1.25255	3.25135
Adenylylsulfate reductase--AprA	0.897915	6.12236	0.332307	0.609642	0.456895	0.157867	0.0345372	1.76826	3.81633	0.158176	0.939411	1.72278	1.92421	1.34975	1.68326	6.81856	1.37324	1.78377	5.55533	2.06979	0.674682	0.986967	1.81973	0.892832
Bifurcating hydrogenases-FeFeA3	1.30809	3.53706	3.28051	2.77194	4.49942	1.71541	1.83695	1.72941	2.68836	4.46037	4.16115	4.66445	3.32157	3.96928	11.2049	8.22272	12.5573	14.3026	3.09229	9.36383	8.87323	3.84383	1.42209	4.52179
Bifurcating hydrogenases-FeFeA4	0	0	0	0	0	0	12.6372	0	0	0	0	4.6217	0	0	1.61225	0	3.98179	0	16.5579	0	0	0	0.905355	3.97125
Acyl-CoA dehydrogenase-ACADS	1.73699	1.5942	1.96881	0.99569	1.98586	0.537113	0.865183	1.42409	1.57404	1.84355	3.44351	2.50304	2.12384	2.0239	9.37074	4.35539	8.29953	12.2505	2.44854	10.7643	4.55	2.61202	0.733598	2.31304
Crotonoyl-CoA reductase-FabV	4.09391	1.91723	3.45245	3.02207	0.314224	4.31917	6.46914	5.53542	7.54454	3.58769	3.63163	5.26256	9.85118	4.78425	4.95808	4.75834	1.30861	8.50403	3.19397	3.02402	8.83853	12.7321	6.9475	9.12919
Dimethyl sulfoxide reductase-DmsA	0	0	0	0	0	0	0	0	0	0	0	0	0	0	0	0	0	0	0	0	0	0	0	0
Energy-converting hydrogenases-NiFec	0	0	0	0	0	0	0	0	0	0	0	0	0	0	8.67542	2.19943	0	1.44705	1.63923	5.38382	0	0	0	6.64903
Energy-converting hydrogenases-NiFe4d	0.503972	0	0.926437	20.67	72.3544	9.674	2.82889	13.1248	7.60618	8.71717	11.071	0	0	179.2	296.616	0	13.0397	0	0	0	0	0	0	154.73
Energy-converting hydrogenases-NiFe4e	0.22996	0.183835	0.230622	0.28086	0.517555	0.715833	0.22066	0.298114	0.0892206	0.710114	1.06233	0.661759	0.908146	0.437161	0.633237	0.394836	0.647134	0.262932	0	1.24148	0.361592	0.292697	0.184973	0
Energy-converting hydrogenases-NiFe4f	0	0	0.073642	0	0	0.263388	0	0	0	0	0	0	0.331654	0	0	0	0	0	0	0	0	0	0	0
Energy-converting hydrogenases-NiFe4g	0.499774	1.08521	0.505397	0.426925	0.518009	0.215713	0.225921	0.422242	0.541516	0.934032	0.252122	0.25641	0.039071	0.17316	0	0.477005	0.709689	0.260472	0.52737	1.12902	0	0.175543	0.990325	0.217197
Fermentative hydrogenases-FeFeA1	0.144071	0.143232	0.134731	0.186472	0.0529493	0.446412	0.152898	0.0254182	2.2136	0.0312093	0.0361803	1.0289	0.111541	0.650206	0.432391	0.343001	1.28757	0.155609	0.859524	0.219559	0.431	0.236823	0.682339	1.38176
Fermentative hydrogenases-FeFeA2	0.786267	1.19919	0.569432	0.829902	0.727912	0.0694606	0.186999	0.0431873	0.0423356	0.127742	1.60292	0.0675967	0.203535	0.125405	0.0515559	0.333839	0.814937	0.568802	0.100667	0.729742	0.0900864	0.124575	0.05982	0.0387569
Fermentative hydrogenases-FeFeB	0.575793	0.524167	0.572763	0.564392	0.468717	0.742553	1.11357	0.843209	0.337966	1.08678	0.326777	0.569476	0.363233	0.955972	0.336876	0.0886296	0.549048	0.414137	0.469893	0.571723	0.171293	0.624504	0.44422	0.468468
Glutamate synthase-GdhA	4.58222	7.14341	10.2788	6.01795	8.30983	4.8335	6.00693	8.21532	6.87206	9.77375	6.71773	11.7387	5.57542	4.32471	5.72462	9.44328	11.6439	12.3745	7.2645	5.40587	8.09157	5.68891	3.50562	3.8311
Glutamate synthase-GltB	0.430473	0.446136	0.320105	0.441714	0.0492869	1.4459	2.10258	0.664779	0.919699	0.0800212	0.091993	0.022882	0.0433402	0.013315	0.0745831	0.0293102	0.219567	0.020675	0.0220733	0.0254981	0.0312995	0.0169355	0.042168	0.069732
Glutamate synthase-GltD	0.543586	0.913469	0.648736	1.18852	0.477301	1.20399	1.52315	1.11	1.1051	1.19658	1.52495	1.58273	2.63452	1.74361	2.3822	2.03234	1.58102	1.77666	1.23315	1.31266	1.48098	2.32155	1.52193	1.42468
Hydrogenase-associated diaphorases-HydB	1.05904	2.46375	2.30856	2.45963	4.09158	1.11476	1.29839	1.90429	2.20054	2.70656	2.94133	3.00403	2.31527	2.92232	6.59198	3.78644	5.47675	8.31255	2.55809	6.24273	5.26064	3.01015	1.64314	3.10378
Lactate dehydrogenase-LDH	1.32675	0.717863	1.34165	0.981116	2.83314	1.49968	2.13807	1.35454	1.23054	2.31841	1.25153	1.74062	2.61556	2.74288	2.42279	2.06363	0.998427	4.33981	1.74136	0.829203	0.863001	5.35439	4.28288	2.38731
Malate dehydrogenase-Mdh	3.91212	4.45529	3.6869	9.67446	7.79948	8.95682	7.39059	14.3671	5.44552	6.07794	10.5151	11.7642	2.0905	9.88104	2.54251	5.88706	5.62259	2.80692	5.2951	2.99939	14.0744	4.4766	1.95582	8.72538
Methanogenesis-Mer	0	0	0	0	0	0	0	0	0	77.8382	0	34.3586	5.45283	42.2412	0	15.8051	0	33.224	37.4093	0	0	0	0	39.9484
Methanogenesis-McrA	476.544	137.633	181.969	80.3489	344.924	113.27	160.132	850.15	1316.42	81.4804	19.4848	78.7392	93.7744	160.82	95.8237	28.4283	105.675	49.7849	325.603	64.8993	88.8688	105.958	209.313	238.398
Methanogenesis-Mtd	0	6.40389	137.081	12.5488	0	9.72599	6.81847	35.3496	10.9579	279.907	0	254.223	29.1043	9.92394	11.4382	4.24666	64.8775	35.3501	12.1862	0	26.7894	22.4052	0	51.1197
Methanogenic hydrogenases-Fe	0	0	0	0	0	0	0	0	0	0	0	10.716	2.83344	0.418634	8.0464	0.838049	0	4.32265	0	26.3567	0	0	1.7229	0
Methanogenic hydrogenases-NiFe3a	53.8607	17.1722	127.473	10.8868	245.39	15.2037	14.3697	10.9427	134.35	60.3013	5.16213	92.5877	49.1047	22.6233	57.8686	1.10543	29.0384	14.1904	70.6371	329.499	19.6462	17.7771	15.3481	834.652
Methanogenic hydrogenases-NiFe3c	191.563	41.9384	47.632	38.107	60.0136	11.9556	188.761	158.681	186.054	346.418	34.086	129.812	41.8196	25.129	21.1507	8.06325	66.4042	10.7397	67.6447	44.4035	9.84147	30.6327	29.6548	147.787
Methanogenic hydrogenases-NiFe4h	0	2.99868	8.70103	0	27.167	0	0	0	0	0	0	0	0	0	1.97361	0	0	0.240182	0	5.88789	1.0293	0	0.545316	23.416
Methanogenic hydrogenases-NiFe4i	0	0	3.035	0	0	0	0	0	0	0	0	2.56571	0	0	0	0	0	0	0	0	0	0	0	2.11284
Nitrate reduction-NapA	0	4.6913	0	0	0	0.31591	0	0.351021	0.819298	0.28515	0	0.423209	8.59005	25.3318	0.0947126	10.2658	4.23097	3.89264	0.603602	0	0	0.316297	0.592127	1.80103
Nitrate reduction-NarG	0.016437	0.0422524	0.032763	0.0119775	0.02079	0.034649	0.0421393	0	0	0.0581004	0.0674067	0	1.57016	0	0	0	0	0	0	0	0	0	0	0
Nitrite reduction to ammonium-NrfA	0.517699	2.75822	0.659363	0.473165	0.18264	0.243143	0.55532	2.81456	0.737499	0.720913	0.727843	0.790074	1.13375	1.11867	4.55312	3.89439	4.27927	1.9847	5.43009	1.45287	1.80924	1.42703	0.415635	3.17816
Nitrous oxide reduction-NosZ	0	2.36904	0	0	0	0.0112602	0	1.55047	0	0	0	0	0	0	0	0	0	0	0	0	0	1.7461	0	0
Respiratory hydrogenases-NiFe1b	0	0	0	0	0	0	0	0	7.31121	0	0	0	8.5599	0	0	7.82574	1.89841	3.0246	17.2721	0	0	0	0.504553	2.59871
Respiratory hydrogenases-NiFe1d	0.109649	0.322195	0.0920603	0.612249	0.0324134	0.213438	0.116627	0.184373	0.4163	0.0233184	0.526947	4.31046	0.559963	0.668659	2.00642	2.16654	4.97706	0.327926	0.195279	0.956374	0.06086	1.11773	0.84803	3.17315
Sensory hydrogenases-FeFeC1	0	0	0.1999	0	0	0.0927441	0.948243	2.11872	0.282365	0.249958	0.442297	0	0.203034	0	0	0	0	0.204214	0	0.688444	0	1.39543	0.204401	0
Sensory hydrogenases-FeFeC2	0.01946	0.433026	0.617196	0.424759	0.105581	0.523301	1.9833	0.397828	0.246221	0.874062	0.676619	0.776062	1.04243	0	0.646396	0.230814	0	1.6782	0.133483	0.826624	0.238812	1.00531	0.0638496	1.3935
Sensory hydrogenases-FeFeC3	1.0137	0.242592	2.68116	0.131644	4.31779	0.306726	0.176903	0.682263	0.0611964	0.77635	0.719075	0	0.195253	0.113132	0.324028	0.219574	0.300843	0.909145	0.0395525	0	0.135166	0	0.0504385	0.128555
Sulfite reductase-AsrA	0.103773	0.398977	0.247969	0.26451	0.125091	0.0709538	0.822266	0	0	0.290165	0	0.39425	0.24029	0.163301	0.242586	0.2892	0	0	0.483505	0.350653	0	0	0.519673	0
Sulfite reductase-DsrA	0	87.2298	0	0	0	2.34929	0	0	0	0	0	11.3759	1.82332	2.44272	6.66839	7.19346	6.87341	2.05043	11.0356	15.8946	0	0	4.19686	4.38309
Wood-Ljungdahl-AcsB	0.714721	2.10987	0.584412	1.32712	1.02819	0.391172	0.71659	0.19292	1.18547	1.80327	14.06	1.82016	1.8885	0.0422292	1.07984	1.55466	2.10493	0.894033	0.392675	6.2759	1.02281	1.58953	0.849808	1.14943
Wood-Ljungdahl-CODH	0.0394862	0.0547963	0.0667142	0.320584	0.00685977	0.257405	0.133055	0.0981659	0.189225	0.0956611	0.963048	0.603184	3.55692	0.552842	2.27191	0.764692	1.54996	0.526209	1.43283	0.487181	0.450608	0.807935	0.744608	1.89584
Wood-Ljungdahl-CooS	0.0190507	0	0.00984132	0.0310106	0	0.0446261	0.0345749	0	0.0498329	0.0916136	0.12585	0.296946	0.145833	0	0.319337	0.238478	0.719728	0.184068	0.207572	0.230925	0	0.0793343	0	0.175061
Wood-Ljungdahl-FdhA	2.19055	2.12884	1.07303	0.295166	1.09573	1.6391	2.0686	14.4986	1.6488	0.523115	1.09211	5.50363	17.5781	9.26594	21.344	3.58002	6.60006	1.82714	12.5622	1.70849	2.03197	19.8345	25.5892	7.85365
Succinate dehydrogenase-SdhA, FrdA	11.021	7.22137	8.15531	13.6192	1.79651	11.907	8.46473	14.1264	9.67307	12.304	8.54021	12.5493	20.9854	28.888	19.2675	20.9272	12.2822	22.8669	9.33053	10.2287	12.6493	20.9175	10.7154	10.4462
